# Supplementary material
Source: PubMed Central journal article supplement (PMC2556828)
Supplement: pp.108.125633_1.pdf [file pp.108.125633_1.pdf]

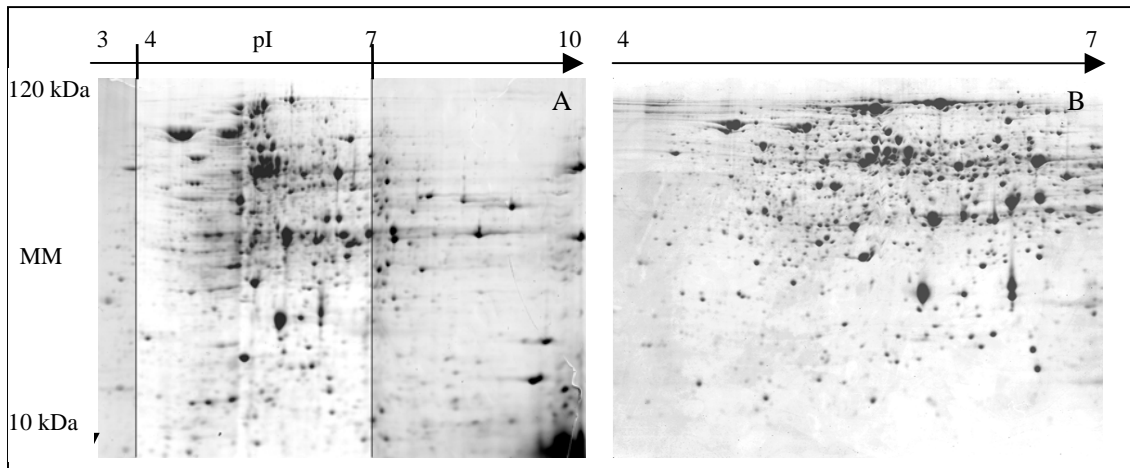

**Figure S1.** Comparison of 2-DE images between pH3-10 and pH4-7 IPG stripes. Proteins were separated by 2-D PAGE and stained by CBB. A, a representative 2-DE image using pH3-10 IPG strip. A mean of  $936 \pm 42$  spots was detected from triplicates, of them  $759 \pm 37$  distributed around pH 4-7. B, a representative 2-DE image using pH4-7 IPG strip. A mean of  $1056 \pm 75$  spots was detected from triplicates. MM in kilodaltons and pI of proteins shown on the left and top of each image, respectively.
