# Supplementary material
Source: PubMed Central journal article supplement (PMC2556828)
Supplement: pp.108.125633_2.pdf [file pp.108.125633_2.pdf]

## Supplementary Figure S2

**PMF-based identifications:** The MS spectra were created on Ultroflex II MALDI TOF/TOF mass spectrometer (Bruker Daltonics, Germany) with flexanalysis 2.4 software. The external calibration of the Ultroflex spectrometer itself and a two-point internal calibration for each spectrum were performed as described previously (Dai et al. 2007). PMFs were searched against the NCBI nr (<http://www.ncbi.nlm.nih.gov/>) and MSDB (<ftp://ftp.ncbi.nih.gov/repository/MSDB>) protein database using the MASCOT v.2.1 ([www.matrixscience.com](http://www.matrixscience.com); Matrix Science, London, UK) search engine. *Oryza sativa* (66,973 sequence entries in NCBI in February 2006; 66,430 sequence entries in MSDB in December 2006) was chosen as the taxonomic category. All peptide masses were supposed as mono-isotopic and  $[M+H]^+$  (protonated molecular ions). Searches involved use of mass accuracy of  $\pm 200$  ppm and one missing cleavage site was allowed for each search. Carbamidomethyl (C) was set as a fixed modification, and oxidation (M), pyro-glu (N-term Q) and Acetyl (N-term) were set as variable modifications.

# Spot 1193

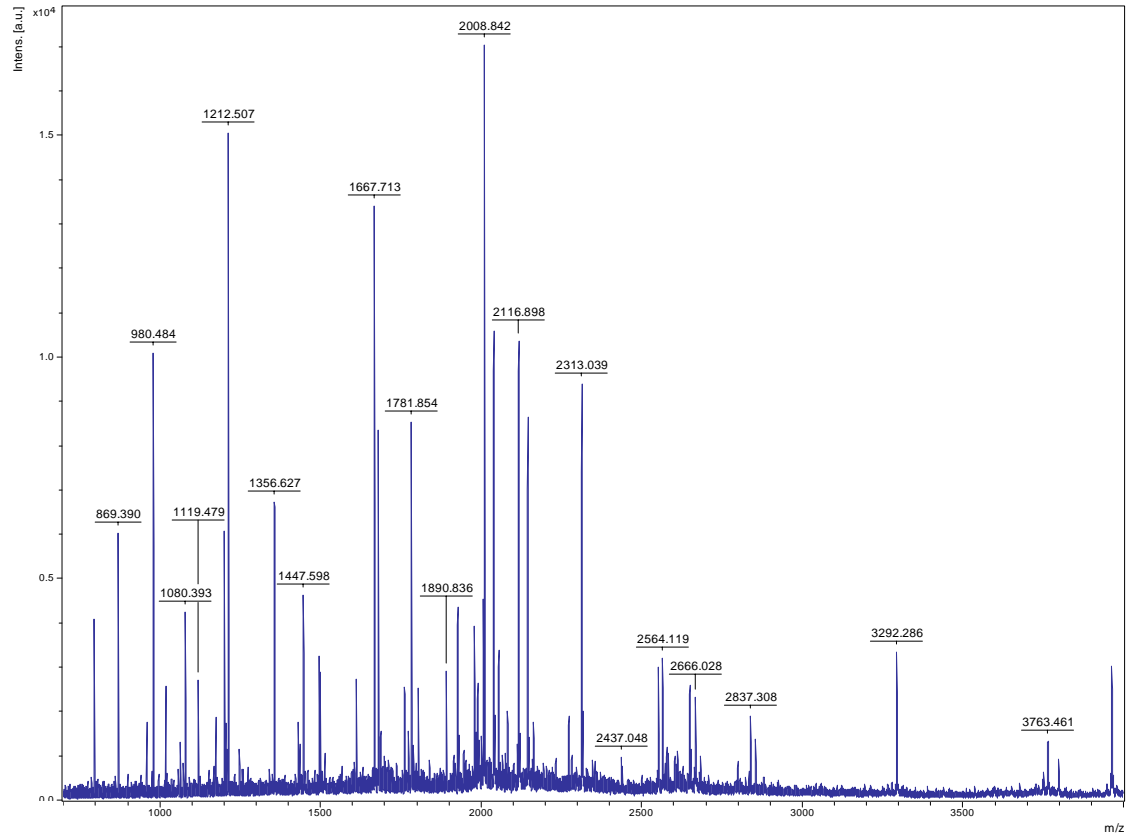

Match to: gi|50930099 Score: 177 Expect: 1.3e-13

## Matched peptides:

| Start - End | Observed  | Mr (expt) | Mr (calc) | Delta   | Miss Sequence                                           |
|-------------|-----------|-----------|-----------|---------|---------------------------------------------------------|
| 19 - 38     | 2132.1197 | 2131.1124 | 2131.1465 | -0.0341 | 0 R.WLAAFFSSVDVAIVAGLPR.V Acetyl (N-term)               |
| 45 - 58     | 1513.7661 | 1512.7588 | 1512.6602 | 0.0987  | 0 R.DAPTCGMWGPVSR.C                                     |
| 87 - 106    | 2313.1862 | 2312.1789 | 2312.1437 | 0.0353  | 0 R.SLIAWNVDQDTSLFLYASR.D                               |
| 107 - 123   | 1803.8428 | 1802.8355 | 1802.7893 | 0.0462  | 0 R.DATMHVSDGAIHGYDSK.I                                 |
| 124 - 140   | 1890.9597 | 1889.9524 | 1889.9370 | 0.0154  | 0 K.IELEPEHASLPDVAEK.F                                  |
| 124 - 145   | 2551.3464 | 2550.3391 | 2550.3118 | 0.0274  | 1 K.IELEPEHASLPDVAEKFPFIR.S                             |
| 164 - 176   | 1447.7058 | 1446.6985 | 1446.6674 | 0.0312  | 0 K.CQLAVASYDAHGR.H Carbamidomethyl (C)                 |
| 207 - 221   | 1761.9167 | 1760.9094 | 1760.8733 | 0.0361  | 0 K.DVDLYLWAPTAQDVR.V                                   |
| 222 - 239   | 1991.0162 | 1990.0089 | 1990.0233 | -0.0144 | 0 R.VCFYDGPAGPLLQTVQLKE Acetyl (N-term)                 |
| 240 - 251   | 1356.7150 | 1355.7077 | 1355.7197 | -0.0120 | 0 K.ELNGVWVSTVPR.Y                                      |
| 252 - 263   | 1667.8285 | 1666.8212 | 1666.7991 | 0.0222  | 1 R.YRENGYYLYEVK.V                                      |
| 275 - 283   | 1080.4097 | 1079.4024 | 1079.4706 | -0.0682 | 0 K.CLADDPYAR.G Carbamidomethyl (C)                     |
| 332 - 345   | 1610.6838 | 1609.6765 | 1609.6427 | 0.0338  | 0 R.DFSAHDSTVDCNSR.G Carbamidomethyl (C)                |
| 350 - 360   | 1212.5682 | 1211.5609 | 1211.5934 | -0.0325 | 0 R.AFTFQDSAGIR.H                                       |
| 402 - 435   | 3796.8977 | 3795.8904 | 3795.8420 | 0.0485  | 0 K.LPPGSDQQAAIVSIQEDPYNWGYDPLVWGVPK.G                  |
| 436 - 447   | 1207.4965 | 1206.4892 | 1206.5265 | -0.0373 | 0 K.GSYASNPDPGPR.I                                      |
| 453 - 460   | 959.4373  | 958.4300  | 958.5018  | -0.0718 | 0 R.QMVQALNR.I                                          |
| 489 - 496   | 980.4796  | 979.4723  | 979.5491  | -0.0767 | 0 K.IVPGYYLR.R                                          |
| 498 - 521   | 2649.2210 | 2648.2137 | 2648.1707 | 0.0431  | 0 R.NVNGQIENSAAMNNTASEHFMVDR.L                          |
| 498 - 521   | 2665.1912 | 2664.1839 | 2664.1656 | 0.0184  | 0 R.NVNGQIENSAAMNNTASEHFMVDR.L Oxidation (M)            |
| 574 - 590   | 1988.9830 | 1987.9757 | 1987.9315 | 0.0442  | 0 K.IYLYGEGWDFGEVAQNK.R                                 |
| 574 - 591   | 2145.0954 | 2144.0881 | 2144.0326 | 0.0555  | 1 K.IYLYGEGWDFGEVAQNK.R.G                               |
| 592 - 611   | 2039.0040 | 2037.9967 | 2037.9537 | 0.0430  | 0 R.GINASQINMSGTGIGSFNDR.I                              |
| 592 - 611   | 2055.0172 | 2054.0099 | 2053.9486 | 0.0613  | 0 R.GINASQINMSGTGIGSFNDR.I Oxidation (M)                |
| 614 - 650   | 3960.8727 | 3959.8654 | 3959.7985 | 0.0669  | 0 R.DSVNNGNPNPLQGGFSTGLFLEPNNGYYQGNEADTR.R              |
| 651 - 669   | 2083.1583 | 2082.1510 | 2082.1221 | 0.0289  | 1 R.RELATYADHIQIAGNLK.D                                 |
| 652 - 669   | 1927.0475 | 1926.0402 | 1926.0210 | 0.0192  | 0 R.RELATYADHIQIAGNLK.D                                 |
| 723 - 732   | 1072.5482 | 1071.5409 | 1071.5812 | -0.0402 | 0 K.TPIGLSIDEK.C                                        |
| 723 - 734   | 1430.6544 | 1429.6471 | 1429.7235 | -0.0764 | 1 K.TPIGLSIDEKCR.I Acetyl (N-term); Carbamidomethyl (C) |
| 735 - 760   | 2853.5111 | 2852.5038 | 2852.4642 | 0.0396  | 0 R.INHLASSMIALSQIPFFHAGDEILR.S Oxidation (M)           |
| 767 - 794   | 3292.5288 | 3291.5215 | 3291.4897 | 0.0319  | 1 R.DSYNSGDWFKLDFYETNNWGVGLPPR.D                        |
| 778 - 794   | 1978.9854 | 1977.9781 | 1977.9584 | 0.0197  | 0 K.LDFTYETNNWGVGLPPR.D                                 |
| 795 - 807   | 1678.8997 | 1677.8924 | 1677.8587 | 0.0338  | 1 R.DKNEENWHLIKPR.L                                     |
| 797 - 807   | 1435.7536 | 1434.7463 | 1434.7368 | 0.0096  | 0 K.NEENWHLIKPR.L                                       |
| 808 - 817   | 1200.6450 | 1199.6377 | 1199.6662 | -0.0285 | 0 R.LENPSRPLK.N                                         |
| 818 - 832   | 1773.9633 | 1772.9560 | 1772.9461 | 0.0100  | 0 K.NHILSVDFNFVILK.I                                    |
| 842 - 851   | 1119.5175 | 1118.5102 | 1118.5567 | -0.0465 | 0 R.LSTASDIEQR.V                                        |
| 854 - 871   | 1971.9996 | 1970.9923 | 1970.9957 | -0.0034 | 0 R.FHNTGPSMPVGVIVMSIK.D Acetyl (N-term); Oxidation (M) |
| 944 - 953   | 1174.6285 | 1173.6212 | 1173.6618 | -0.0406 | 1 R.RTTAVFVQPR.C                                        |
| 945 - 953   | 1018.5084 | 1017.5011 | 1017.5607 | -0.0596 | 0 R.RTTAVFVQPR.C                                        |

# Spot 1196

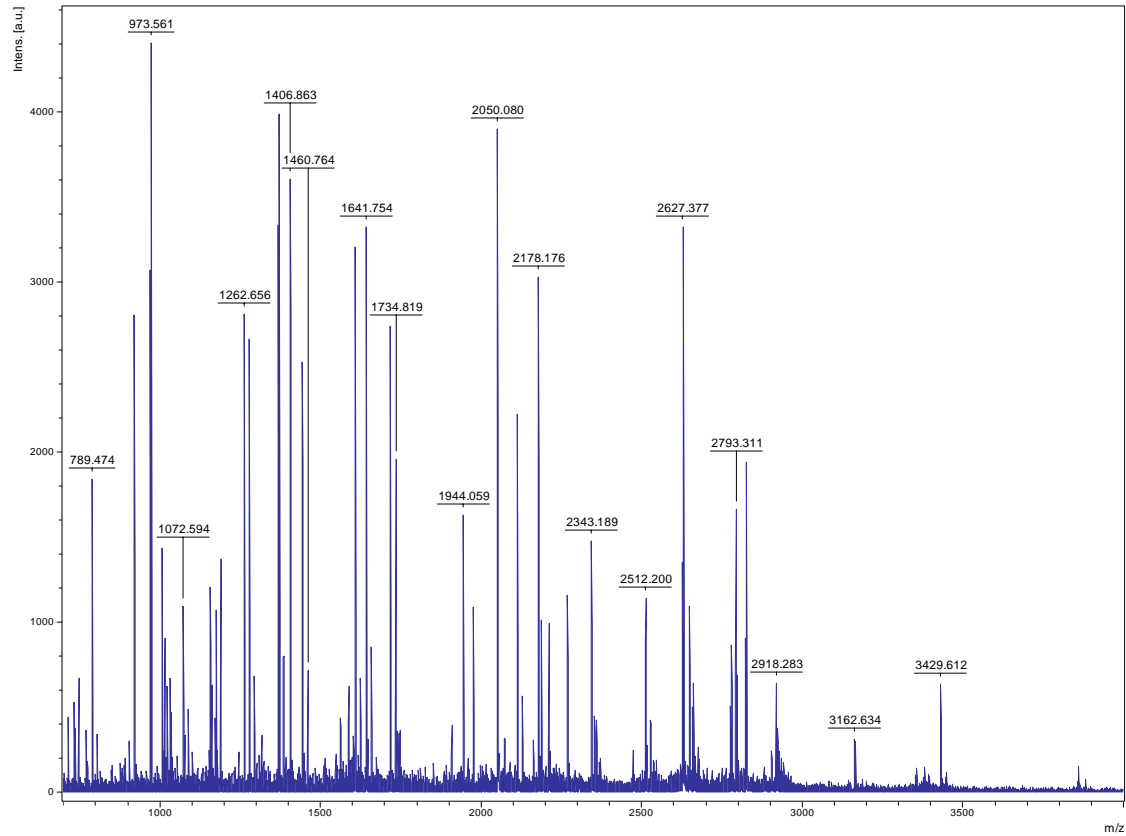

Match to: gi|50878307 Score: 165 Expect: 2.1e-12

## Matched peptides:

| Start - End | Observed  | Mr (expt) | Mr (calc) | Delta   | Miss Sequence                                                     |
|-------------|-----------|-----------|-----------|---------|-------------------------------------------------------------------|
| 1 - 6       | 734.2758  | 733.2685  | 733.3428  | -0.0743 | 0 -.MPSVSR.A Acetyl (N-term); Oxidation (M)                       |
| 49 - 64     | 1527.7592 | 1526.7519 | 1526.7007 | 0.0512  | 1 R.SGGGSARGGHCSPLR.A Acetyl (N-term)                             |
| 156 - 168   | 1406.8801 | 1405.8728 | 1405.8405 | 0.0323  | 0 R.LGDPARPLLLSVR.S                                               |
| 169 - 198   | 2903.3825 | 2902.3752 | 2902.4237 | -0.0485 | 0 R.SGAAVSMPGMDTVLNLGLNDEVAAGLAAK.S                               |
| 203 - 209   | 921.3396  | 920.3323  | 920.4028  | -0.0705 | 0 R.FAYDSYR.R                                                     |
| 211 - 230   | 2352.1493 | 2351.1420 | 2351.1329 | 0.0091  | 0 R.FLDMFGNVVMDIPHALFEEK.L                                        |
| 211 - 235   | 2924.4480 | 2923.4407 | 2923.4321 | 0.0086  | 1 R.FLDMFGNVVMDIPHALFEEKLEAMK.A                                   |
| 276 - 293   | 2072.1409 | 2071.1336 | 2071.1214 | 0.0122  | 1 K.KQLQLAVLAVFNWSWDSR.A                                          |
| 277 - 293   | 1944.0712 | 1943.0639 | 1943.0264 | 0.0375  | 0 K.QLQLAVLAVFNWSWDSR.A                                           |
| 308 - 333   | 2659.3088 | 2658.3015 | 2658.2893 | 0.0122  | 0 K.GTAVNVQTMVFGNMGNTSGTGVLFTR.N                                  |
| 308 - 333   | 2675.3030 | 2674.2957 | 2674.2842 | 0.0115  | 0 K.GTAVNVQTMVFGNMGNTSGTGVLFTR.N Oxidation (M)                    |
| 341 - 360   | 2178.1880 | 2177.1807 | 2177.1479 | 0.0328  | 1 K.KLYGEFLVNAQGEDVVAGIR.T                                        |
| 342 - 360   | 2050.0821 | 2049.0748 | 2049.0530 | 0.0218  | 0 K.LYGEFLVNAQGEDVVAGIR.T                                         |
| 361 - 384   | 2918.2739 | 2917.2666 | 2917.2568 | 0.0098  | 1 R.TPEDLDAMRDHMPPEYEELVENCK.I Carbamidomethyl (C)                |
| 361 - 384   | 2934.2204 | 2933.2131 | 2933.2517 | -0.0386 | 1 R.TPEDLDAMRDHMPPEYEELVENCK.I Carbamidomethyl (C); Oxidation (M) |
| 385 - 404   | 2512.1881 | 2511.1808 | 2511.1773 | 0.0035  | 1 K.ILESHYKEMMDIEFTVQENR.L                                        |
| 385 - 404   | 2528.1973 | 2527.1900 | 2527.1722 | 0.0178  | 1 K.ILESHYKEMMDIEFTVQENR.L Oxidation (M)                          |
| 385 - 404   | 2544.1588 | 2543.1515 | 2543.1672 | -0.0156 | 1 K.ILESHYKEMMDIEFTVQENR.L 2 Oxidation (M)                        |
| 392 - 404   | 1641.7666 | 1640.7593 | 1640.7174 | 0.0419  | 0 K.EMMDIEFTVQENR.L                                               |
| 392 - 404   | 1673.7776 | 1672.7703 | 1672.7072 | 0.0631  | 0 K.EMMDIEFTVQENR.L 2 Oxidation (M)                               |
| 405 - 411   | 1006.4495 | 1005.4422 | 1005.4888 | -0.0466 | 0 R.LWMLQCR.T Carbamidomethyl (C)                                 |
| 405 - 411   | 1022.4581 | 1021.4508 | 1021.4837 | -0.0329 | 0 R.LWMLQCR.T Carbamidomethyl (C); Oxidation (M)                  |
| 423 - 435   | 1444.7677 | 1443.7604 | 1443.7391 | 0.0213  | 0 K.IAVDMVNEGLVER.R                                               |
| 423 - 435   | 1460.7675 | 1459.7602 | 1459.7340 | 0.0262  | 0 K.IAVDMVNEGLVER.R Oxidation (M)                                 |
| 423 - 436   | 1600.8816 | 1599.8743 | 1599.8402 | 0.0341  | 1 K.IAVDMVNEGLVERR.T                                              |
| 441 - 462   | 2536.1773 | 2535.1700 | 2535.2216 | -0.0515 | 0 K.MVEPGHLDQLLHPQFENPSGYK.D                                      |
| 503 - 523   | 2112.0684 | 2111.0611 | 2111.0316 | 0.0295  | 0 R.TETSPEDVGGMHAAVGLTAR.G                                        |
| 503 - 523   | 2128.0312 | 2127.0239 | 2127.0266 | -0.0026 | 0 R.TETSPEDVGGMHAAVGLTAR.G Oxidation (M)                          |
| 584 - 606   | 2647.2596 | 2646.2523 | 2646.2458 | 0.0066  | 0 K.QPLCPPALSGDLTFMSWVDEV.R.K Carbamidomethyl (C)                 |
| 610 - 624   | 1562.7393 | 1561.7320 | 1561.7042 | 0.0278  | 0 K.VMANADTPEDATTAR.Q                                             |
| 625 - 635   | 1174.5646 | 1173.5573 | 1173.5560 | 0.0013  | 0 R.QNGAEGIGLCR.T Carbamidomethyl (C)                             |
| 636 - 646   | 1385.6002 | 1384.5929 | 1384.5717 | 0.0212  | 0 R.TEHMFFASDER.I Oxidation (M)                                   |
| 652 - 662   | 1294.6495 | 1293.6422 | 1293.6421 | 0.0002  | 0 R.QMIMASSEL.R.Q Oxidation (M)                                   |
| 683 - 692   | 1072.5575 | 1071.5502 | 1071.5746 | -0.0244 | 0 R.AMDGLPVTIR.L                                                  |
| 693 - 712   | 2343.1911 | 2342.1838 | 2342.1728 | 0.0110  | 0 R.LLDPLHEFLPEGHVEDMVR.E                                         |
| 693 - 712   | 2359.1763 | 2358.1690 | 2358.1678 | 0.0013  | 0 R.LLDPLHEFLPEGHVEDMVR.E Oxidation (M)                           |
| 713 - 728   | 1734.8443 | 1733.8370 | 1733.7890 | 0.0480  | 0 R.ELCSETGAAQDDVLR.V Carbamidomethyl (C)                         |
| 732 - 742   | 1262.6650 | 1261.6577 | 1261.6488 | 0.0089  | 0 K.LESEVNPMLGFR.G                                                |
| 746 - 759   | 1607.8611 | 1606.8538 | 1606.8024 | 0.0514  | 0 R.LGISYPELTEMQAR.A                                              |
| 816 - 824   | 1015.5289 | 1014.5216 | 1014.5532 | -0.0315 | 0 K.VGTMIEIPR.A                                                   |
| 904 - 922   | 1974.9979 | 1973.9906 | 1973.9668 | 0.0238  | 0 K.VGICGEGHGPELVSFAFAK.A Carbamidomethyl (C)                     |
| 923 - 939   | 1907.9746 | 1906.9673 | 1906.9723 | -0.0050 | 1 K.AGLDYVSCSPFRVPIAR.L Carbamidomethyl (C)                       |

# Spot 1197

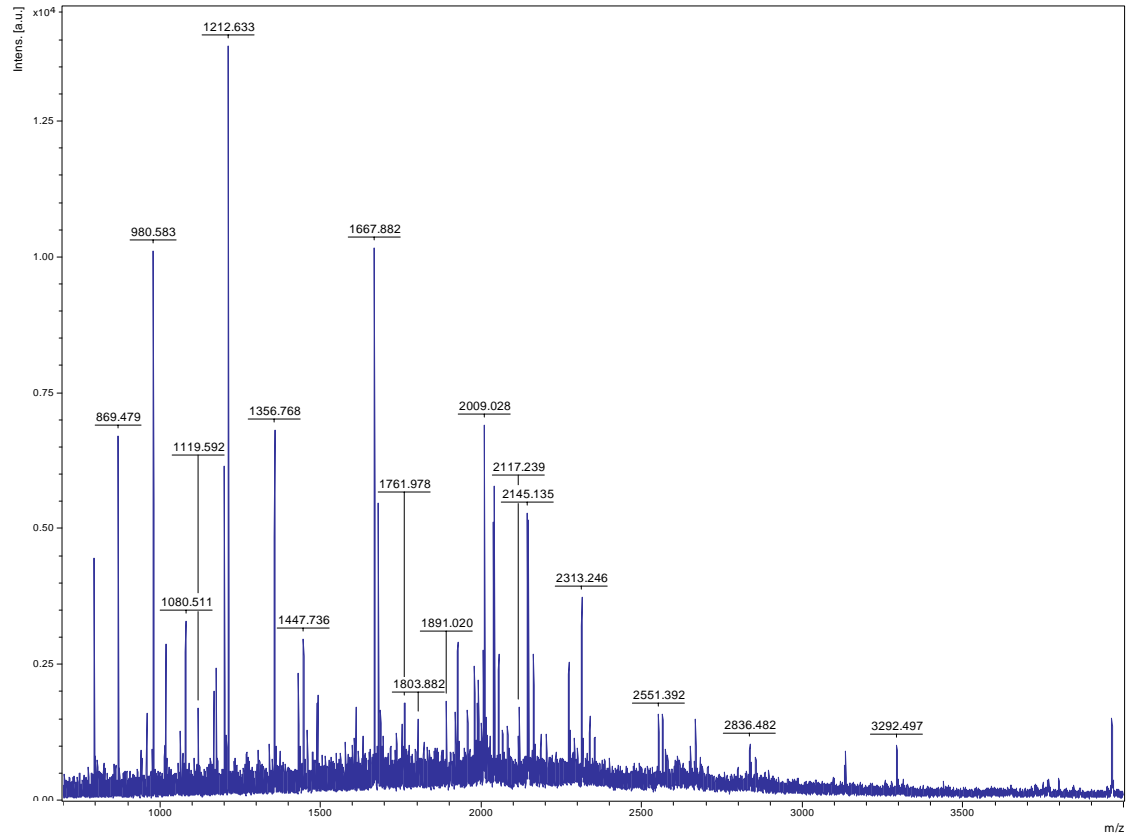

Match to: gi|50930099 Score: 150 Expect: 6.7e-11

## Matched peptides:

| Start - End | Observed  | Mr (expt) | Mr (calc) | Delta   | Miss Sequence                                           |
|-------------|-----------|-----------|-----------|---------|---------------------------------------------------------|
| 87 - 106    | 2313.2456 | 2312.2383 | 2312.1437 | 0.0947  | 0 R.SLIAWNVDQDTSFLYASR.D                                |
| 124 - 140   | 1891.0195 | 1890.0123 | 1889.9370 | 0.0752  | 0 K.IELEPEHASLPDVAEK.F                                  |
| 124 - 145   | 2551.3921 | 2550.3848 | 2550.3118 | 0.0731  | 1 K.IELEPEHASLPDVAEKFPFIR.S                             |
| 152 - 163   | 1200.6992 | 1199.6919 | 1199.6761 | 0.0158  | 0 R.VPSSVDVASLVK.C                                      |
| 164 - 176   | 1447.7360 | 1446.7287 | 1446.6674 | 0.0613  | 0 K.CQLAVASYDAHGR.H Carbamidomethyl (C)                 |
| 207 - 221   | 1761.9781 | 1760.9709 | 1760.8733 | 0.0976  | 0 K.DVDLYLWAPTAQDVR.V                                   |
| 207 - 221   | 1803.8820 | 1802.8747 | 1802.8839 | -0.0092 | 0 K.DVDLYLWAPTAQDVR.V Acetyl (N-term)                   |
| 222 - 239   | 2006.1146 | 2005.1073 | 2005.0342 | 0.0731  | 0 R.VCFYDGPAGPLLQTVQLK.E Carbamidomethyl (C)            |
| 240 - 251   | 1356.7678 | 1355.7605 | 1355.7197 | 0.0408  | 0 K.ELNGVWVSYVPR.Y                                      |
| 252 - 263   | 1667.8822 | 1666.8749 | 1666.7991 | 0.0759  | 1 R.YRENQYYLYEVK.V                                      |
| 275 - 283   | 1080.5106 | 1079.5033 | 1079.4706 | 0.0328  | 0 K.CLADDPYAR.G Carbamidomethyl (C)                     |
| 332 - 345   | 1610.7153 | 1609.7081 | 1609.6427 | 0.0654  | 0 R.DFSAHDSTVDCNSR.G Carbamidomethyl (C)                |
| 350 - 360   | 1212.6326 | 1211.6253 | 1211.5934 | 0.0318  | 0 R.AFTFQDSAGIR.H                                       |
| 436 - 447   | 1207.5654 | 1206.5582 | 1206.5265 | 0.0317  | 0 K.GSYASNPDPGPR.I                                      |
| 453 - 460   | 959.5280  | 958.5207  | 958.5018  | 0.0189  | 0 R.QMVQALNR.I                                          |
| 453 - 460   | 975.5393  | 974.5320  | 974.4967  | 0.0353  | 0 R.QMVQALNR.I Oxidation (M)                            |
| 489 - 496   | 980.5827  | 979.5754  | 979.5491  | 0.0264  | 0 K.IVPGYYLR.R                                          |
| 574 - 590   | 1989.0208 | 1988.0135 | 1987.9315 | 0.0820  | 0 K.IYLYGEGWDFGEVAQNK.R                                 |
| 574 - 591   | 2145.1353 | 2144.1280 | 2144.0326 | 0.0954  | 1 K.IYLYGEGWDFGEVAQNK.R.G                               |
| 652 - 669   | 1927.0967 | 1926.0894 | 1926.0210 | 0.0684  | 0 R.ELATYADHIQIAGLNK.D                                  |
| 723 - 732   | 1072.6217 | 1071.6144 | 1071.5812 | 0.0333  | 0 K.TPIGLSIDEK.C                                        |
| 723 - 734   | 1430.7051 | 1429.6978 | 1429.7235 | -0.0257 | 1 K.TPIGLSIDEKCR.I Acetyl (N-term); Carbamidomethyl (C) |
| 767 - 794   | 3292.4973 | 3291.4900 | 3291.4897 | 0.0004  | 1 R.DSYNSGDWFNKLDFYETNNWGVGLPPR.D                       |
| 778 - 794   | 1979.0348 | 1978.0275 | 1977.9584 | 0.0691  | 0 K.LDFTYETNNWGVGLPPR.D                                 |
| 795 - 807   | 1678.9416 | 1677.9344 | 1677.8587 | 0.0757  | 1 R.DKNEENWHLIKPR.L                                     |
| 835 - 841   | 869.4790  | 868.4717  | 868.4443  | 0.0275  | 0 R.YSSPLFR.L                                           |
| 842 - 851   | 1119.5917 | 1118.5844 | 1118.5567 | 0.0277  | 0 R.LSTASDIQR.V                                         |
| 944 - 953   | 1174.6990 | 1173.6917 | 1173.6618 | 0.0299  | 1 R.RTTAVFVQPR.C                                        |
| 945 - 953   | 1018.5923 | 1017.5850 | 1017.5607 | 0.0243  | 0 R.TTAVFVQPR.C                                         |

# Spot 1198

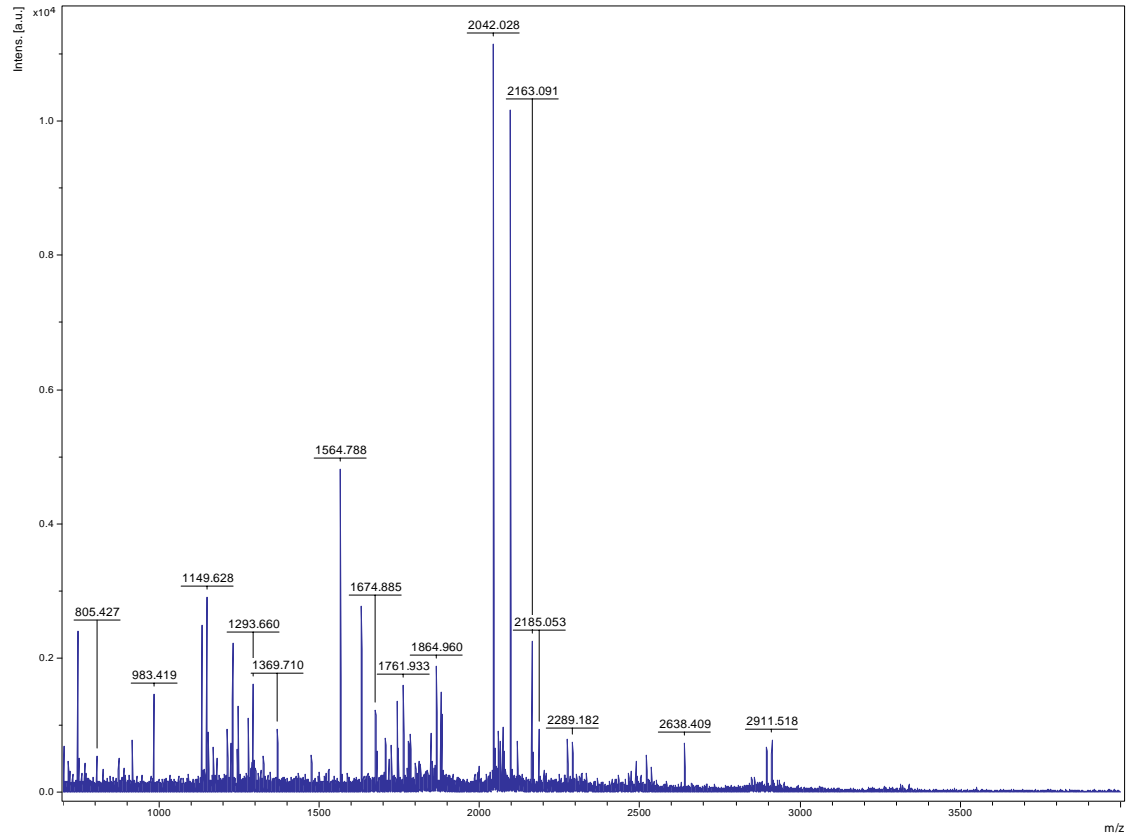

Match to: gi|51090952 Score: 269 Expect: 1.3e-23

## Matched peptides:

| Start - End | Observed  | Mr (expt) | Mr (calc) | Delta   | Miss Sequence                     |                     |
|-------------|-----------|-----------|-----------|---------|-----------------------------------|---------------------|
| 51 - 72     | 2488.2319 | 2487.2247 | 2487.1964 | 0.0282  | 0 R.HSDGLPHLNQAEAEATWMGLLPR.R     | Oxidation (M)       |
| 74 - 87     | 1674.8853 | 1673.8780 | 1673.8525 | 0.0255  | 1 R.AGPRDELDWLALYR.S              |                     |
| 78 - 87     | 1293.6597 | 1292.6524 | 1292.6401 | 0.0123  | 0 R.DELDWLALYR.S                  |                     |
| 92 - 113    | 2095.0576 | 2094.0503 | 2094.0129 | 0.0374  | 0 R.GGGDVGGEPAGFLSPASLHDVR.V      |                     |
| 151 - 169   | 2042.0276 | 2041.0203 | 2040.9904 | 0.0299  | 0 K.LPTVGPYPYGGWEAPDQGLR.G        |                     |
| 199 - 208   | 1224.6372 | 1223.6299 | 1223.6220 | 0.0080  | 0 K.VVDILYSCQK.K                  | Carbamidomethyl (C) |
| 242 - 257   | 1761.9335 | 1760.9262 | 1760.9131 | 0.0131  | 0 K.IMQGLLDQYTLAGNPK.G            |                     |
| 242 - 257   | 1777.9369 | 1776.9296 | 1776.9080 | 0.0216  | 0 K.IMQGLLDQYTLAGNPK.G            | Oxidation (M)       |
| 275 - 284   | 1277.7172 | 1276.7099 | 1276.7139 | -0.0040 | 1 K.KLIQEYSIQR.H                  |                     |
| 276 - 284   | 1149.6276 | 1148.6203 | 1148.6189 | 0.0013  | 0 K.KLIQEYSIQR.H                  |                     |
| 353 - 363   | 1369.7101 | 1368.7028 | 1368.7037 | -0.0009 | 1 K.RYEVVGDQLYK.E                 |                     |
| 354 - 363   | 1213.6185 | 1212.6113 | 1212.6026 | 0.0087  | 0 R.YEVVGDQLYK.E                  |                     |
| 402 - 416   | 1742.8546 | 1741.8473 | 1741.8192 | 0.0281  | 0 K.ISSNEETCATYNLLK.V             | Carbamidomethyl (C) |
| 430 - 436   | 983.4193  | 982.4120  | 982.4144  | -0.0025 | 0 K.YTDHYER.L                     |                     |
| 437 - 447   | 1228.6736 | 1227.6663 | 1227.6757 | -0.0094 | 0 R.LLINGIMGNQR.G                 |                     |
| 437 - 447   | 1244.6730 | 1243.6657 | 1243.6706 | -0.0049 | 0 R.LLINGIMGNQR.G                 | Oxidation (M)       |
| 448 - 464   | 1848.9689 | 1847.9616 | 1847.9425 | 0.0191  | 1 R.GKPEGVMIYFLPMGPGR.S           |                     |
| 448 - 464   | 1864.9600 | 1863.9527 | 1863.9375 | 0.0152  | 1 R.GKPEGVMIYFLPMGPGR.S           | Oxidation (M)       |
| 448 - 464   | 1880.9478 | 1879.9405 | 1879.9324 | 0.0081  | 1 R.GKPEGVMIYFLPMGPGR.S           | 2 Oxidation (M)     |
| 563 - 573   | 1168.6213 | 1167.6141 | 1167.6108 | 0.0033  | 0 K.GDARPANVVR.I                  |                     |
| 606 - 615   | 1147.5936 | 1146.5864 | 1146.5921 | -0.0057 | 0 K.LWGDDTLSLK.F                  |                     |
| 743 - 759   | 1631.7963 | 1630.7890 | 1630.7699 | 0.0191  | 0 R.AYHSPSGASIDAATGR.L            |                     |
| 764 - 791   | 2895.5188 | 2894.5115 | 2894.4708 | 0.0407  | 0 R.DVALEPFDRPMAVTDALSVGRPGPATR.F |                     |
| 764 - 791   | 2911.5178 | 2910.5105 | 2910.4657 | 0.0448  | 0 R.DVALEPFDRPMAVTDALSVGRPGPATR.F | Oxidation (M)       |
| 836 - 852   | 1722.7678 | 1721.7605 | 1721.7492 | 0.0113  | 0 R.KPTAAGGGEDDDDTAFRR.R          |                     |
| 836 - 853   | 1878.8820 | 1877.8747 | 1877.8503 | 0.0244  | 1 R.KPTAAGGGEDDDDTAFRR.A          |                     |
| 853 - 864   | 1288.6746 | 1287.6673 | 1287.7047 | -0.0374 | 1 R.RAASFTQAAPLR.L                |                     |
| 854 - 864   | 1132.6162 | 1131.6089 | 1131.6036 | 0.0053  | 0 R.AASFTQAAPLR.L                 |                     |
| 865 - 878   | 1564.7880 | 1563.7807 | 1563.7681 | 0.0126  | 0 R.LYHPLSFSATGTDR.N              |                     |

# Spot 1202

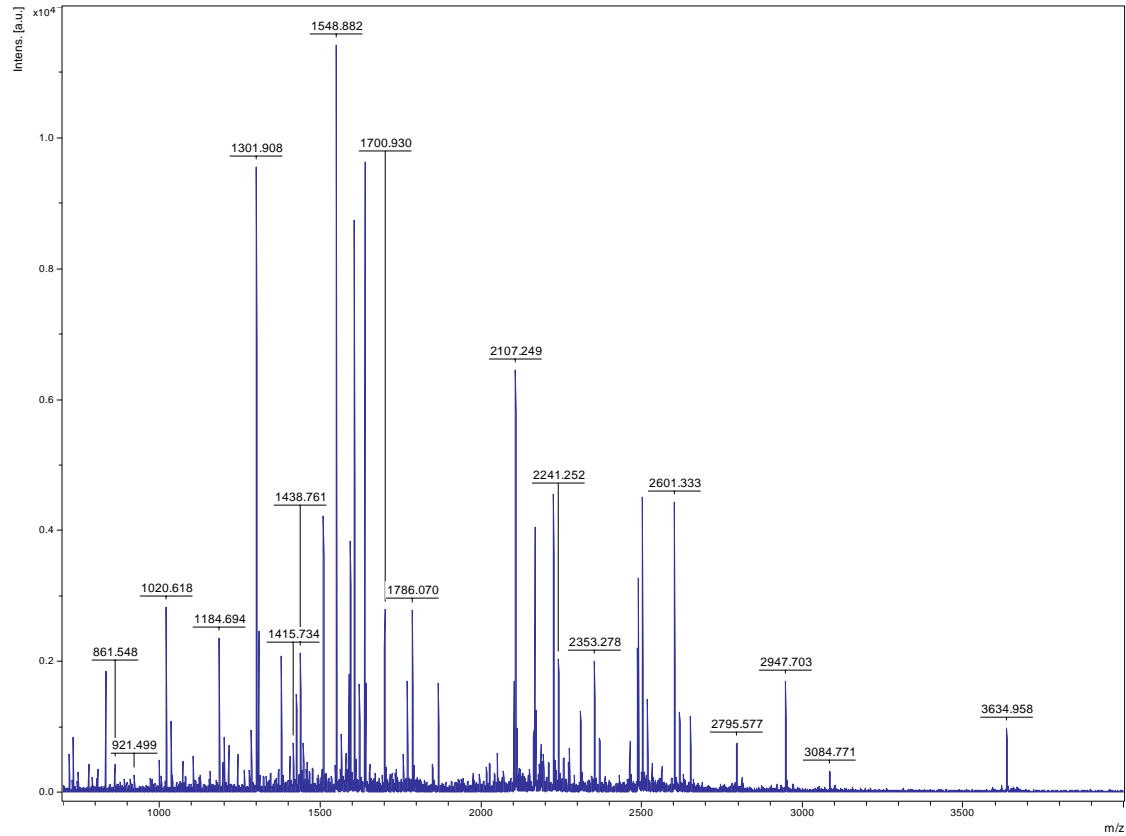

Match to: gj|13195430 Score: 304 Expect: 5.3e-26

## Matched peptides:

| Start - End | Observed  | Mr (expt) | Mr (calc) | ppm | Miss Sequence                                      |
|-------------|-----------|-----------|-----------|-----|----------------------------------------------------|
| 8 - 36      | 2947.7031 | 2946.6959 | 2946.4669 | 78  | 0 R.GVQGSVPPEEIESSVLNSIDSSSTIASNIK.H               |
| 62 - 80     | 2353.2780 | 2352.2707 | 2352.0732 | 84  | 0 K.SVLDTLIMNWNATYDYDR.T                           |
| 62 - 84     | 2795.5773 | 2794.5700 | 2794.3272 | 87  | 1 K.SVLDTLIMNWNATYDYDRNVK.Q                        |
| 85 - 97     | 1588.8879 | 1587.8806 | 1587.7392 | 89  | 0 K.QAYYLSMEFLQGR.A Gln->pyro-Glu (N-term Q)       |
| 85 - 97     | 1605.9169 | 1604.9096 | 1604.7657 | 90  | 0 K.QAYYLSMEFLQGR.A                                |
| 167 - 176   | 1184.6940 | 1183.6867 | 1183.7077 | -18 | 1 K.HGLFKQITK.D                                    |
| 172 - 197   | 3084.7708 | 3083.7635 | 3083.5022 | 85  | 1 K.QIITKDGQEEVAENWLEMGNPWEIVR.T                   |
| 177 - 197   | 2501.3504 | 2500.3431 | 2500.1329 | 84  | 0 K.DGQEEVAENWLEMGNPWEIVR.T                        |
| 242 - 247   | 718.4656  | 717.4583  | 717.3769  | 113 | 0 K.TTNLRL                                         |
| 248 - 280   | 3634.9582 | 3633.9509 | 3633.6648 | 79  | 0 R.LWSTTVPSQDFDLEAFNAGDHASAYEAHLNAEK.I            |
| 299 - 316   | 2109.3048 | 2108.2975 | 2108.0936 | 97  | 1 R.LKQYTLCSASLQDIHAR.F Carboxymethyl (C)          |
| 301 - 319   | 2225.2689 | 2224.2616 | 2224.0946 | 75  | 1 K.QQYTLCSASLQDIHARFER.R Gln->pyro-Glu (N-term Q) |
| 321 - 333   | 1438.7610 | 1437.7538 | 1437.6412 | 78  | 0 R.AGDSLWEDFPSK.V                                 |
| 359 - 371   | 1548.8824 | 1547.8751 | 1547.7368 | 89  | 0 K.GLSWNEAWSITER.T                                |
| 372 - 387   | 1786.0697 | 1785.0624 | 1784.9308 | 74  | 0 R.TVAYTNHTVLEPALEK.W                             |
| 388 - 395   | 1020.6175 | 1019.6103 | 1019.5110 | 97  | 0 K.WSLDIMQK.L                                     |
| 436 - 448   | 1426.8910 | 1425.8838 | 1425.7715 | 79  | 0 R.ILDNIDLPSIAK.L                                 |
| 471 - 481   | 1215.7430 | 1214.7357 | 1214.6394 | 79  | 0 K.SLEPSVVVEEK.T                                  |
| 595 - 612   | 2103.2271 | 2102.2198 | 2102.0684 | 72  | 1 K.WIGSDDWVLTDKLAEK.K                             |
| 613 - 625   | 1638.8885 | 1637.8812 | 1637.7321 | 91  | 1 K.KFADDEDLQSEWR.A                                |
| 614 - 625   | 1510.7778 | 1509.7705 | 1509.6372 | 88  | 0 K.KFADDEDLQSEWR.A                                |
| 641 - 658   | 2027.1710 | 2026.1637 | 2026.0081 | 77  | 1 R.EKTGYIVSPDAMFDVQVK.R                           |
| 643 - 658   | 1770.0192 | 1769.0119 | 1768.8706 | 80  | 0 K.TGYIVSPDAMFDVQVK.R                             |
| 666 - 676   | 1284.8866 | 1283.8793 | 1283.7601 | 93  | 0 R.QLLNILGIVYR.Y Gln->pyro-Glu (N-term Q)         |
| 666 - 676   | 1301.9077 | 1300.9004 | 1300.7867 | 87  | 0 R.QLLNILGIVYR.Y                                  |
| 687 - 695   | 1103.7009 | 1102.6936 | 1102.5883 | 95  | 1 K.DRINSFVPR.V                                    |
| 689 - 695   | 832.5579  | 831.5506  | 831.4603  | 109 | 0 R.INSFVPR.V                                      |
| 689 - 702   | 1594.8916 | 1593.8843 | 1593.8337 | 32  | 1 R.INSFVPRVCIFGK.A Carboxymethyl (C)              |
| 703 - 711   | 998.6255  | 997.6183  | 997.5233  | 95  | 0 K.AFATYVQAK.R                                    |
| 716 - 735   | 2168.2822 | 2167.2749 | 2167.1161 | 73  | 0 K.FITDVAATVNHDPDGLL.V                            |
| 775 - 794   | 2107.2493 | 2106.2421 | 2106.0602 | 86  | 0 K.FAMNGCILGTLGDGANVEIR.E                         |
| 795 - 816   | 2464.3854 | 2463.3781 | 2463.1706 | 84  | 0 R.EEVGEENFLFGAEAEHIALGR.K                        |
| 824 - 829   | 730.4733  | 729.4660  | 729.3810  | 117 | 0 K.FVPDPR.F                                       |
| 830 - 835   | 807.5248  | 806.5176  | 806.4286  | 110 | 1 R.FEEVRR.F                                       |
| 839 - 862   | 2601.3331 | 2600.3258 | 2600.1125 | 82  | 0 R.SGVFGTYNYDDLMSLEGNEGYGR.A                      |
| 871 - 884   | 1700.9304 | 1699.9232 | 1699.7763 | 86  | 1 K.DFPSYIECQEKVDK.A                               |
| 895 - 910   | 1757.9279 | 1756.9207 | 1756.8414 | 45  | 1 R.MSILNTASSSKFNSDR.T                             |
| 911 - 917   | 861.5482  | 860.5409  | 860.4392  | 118 | 0 R.THEYAK.D                                       |
| 918 - 928   | 1308.8492 | 1307.8420 | 1307.7489 | 71  | 0 K.DIWDIKPVILP.-                                  |

## Spot 1203

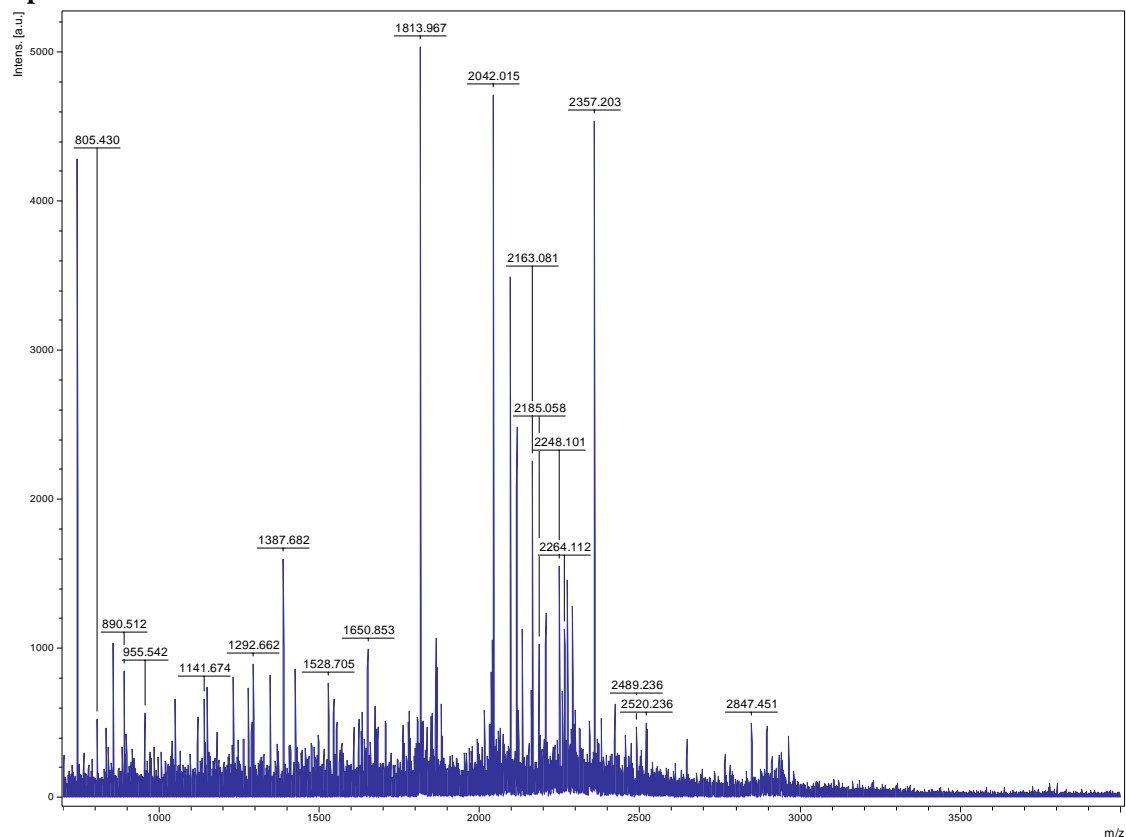

Match to: gi|38344860; Score: 163 Expect: 2.4e-11

### Matched peptides:

| Start - End | Observed | Mr (expt) | Mr (calc) | Delta | Miss Sequence                          |
|-------------|----------|-----------|-----------|-------|----------------------------------------|
| 2 - 10      | 1120.63  | 1119.62   | 1119.63   | -0.00 | 1 VKFTVEELR                            |
| 4 - 11      | 1049.58  | 1048.58   | 1048.57   | 0.01  | 1 FTVEELRR                             |
| 33 - 55     | 2257.18  | 2256.18   | 2256.20   | -0.02 | 0 STLTDLSLVAAAGHIAQEVAGDVR             |
| 151 - 159   | 1039.64  | 1038.64   | 1038.65   | -0.02 | 0 IRPVLTVNK                            |
| 163 - 180   | 2206.04  | 2205.03   | 2205.00   | 0.03  | 0 CFLELQVEGEEAYQTFSR                   |
| 244 - 255   | 1424.69  | 1423.69   | 1423.68   | 0.01  | 0 LWGENFFDPATK                         |
| 244 - 256   | 1552.78  | 1551.78   | 1551.77   | 0.01  | 1 LWGENFFDPATK                         |
| 269 - 280   | 1543.78  | 1542.78   | 1542.77   | 0.02  | 1 RGFVQFCYEPIK                         |
| 270 - 280   | 1387.68  | 1386.68   | 1386.66   | 0.02  | 0 GGFVQFCYEPIK                         |
| 349 - 368   | 2357.20  | 2356.20   | 2356.17   | 0.03  | 1 YRVENLYEGPLDDVYATAIR                 |
| 351 - 368   | 2038.03  | 2037.03   | 2037.01   | 0.03  | 0 VENLYEGPLDDVYATAIR                   |
| 432 - 438   | 834.46   | 833.46    | 833.45    | 0.01  | 0 TVIWMGK                              |
| 472 - 482   | 1277.72  | 1276.71   | 1276.59   | 0.12  | 1 EADACPIRAMK Oxidation (M)            |
| 483 - 490   | 890.51   | 889.51    | 889.50    | 0.01  | 0 FSVSPVVR                             |
| 544 - 565   | 2422.20  | 2421.19   | 2421.19   | 0.00  | 0 DLQEDFMGGAEIIVSPPVVSFR Oxidation (M) |
| 587 - 606   | 2248.10  | 2247.10   | 2247.08   | 0.01  | 0 LYMEARPLEEGLAEIIDDGR                 |
| 587 - 606   | 2264.11  | 2263.11   | 2263.08   | 0.03  | 0 LYMEARPLEEGLAEIIDDGR Oxidation (M)   |
| 619 - 632   | 1650.85  | 1649.85   | 1649.83   | 0.02  | 1 ILSEEFGWKDLAK                        |
| 662 - 673   | 1294.66  | 1293.65   | 1293.64   | 0.02  | 0 DSVVAGFWASK                          |
| 702 - 711   | 955.54   | 954.54    | 954.52    | 0.02  | 0 GGGQVIPTAR                           |
| 713 - 724   | 1346.78  | 1345.78   | 1345.77   | 0.01  | 0 VIYASQLTAKPR                         |
| 753 - 770   | 2116.08  | 2115.08   | 2115.06   | 0.03  | 0 GHVFEEMQRPGTPLYNIK                   |
| 753 - 770   | 2132.07  | 2131.07   | 2131.05   | 0.02  | 0 GHVFEEMQRPGTPLYNIK Oxidation (M)     |
| 771 - 786   | 1813.97  | 1812.96   | 1812.94   | 0.02  | 0 AYLPIESFGFSSQLR                      |

## Spot 1213

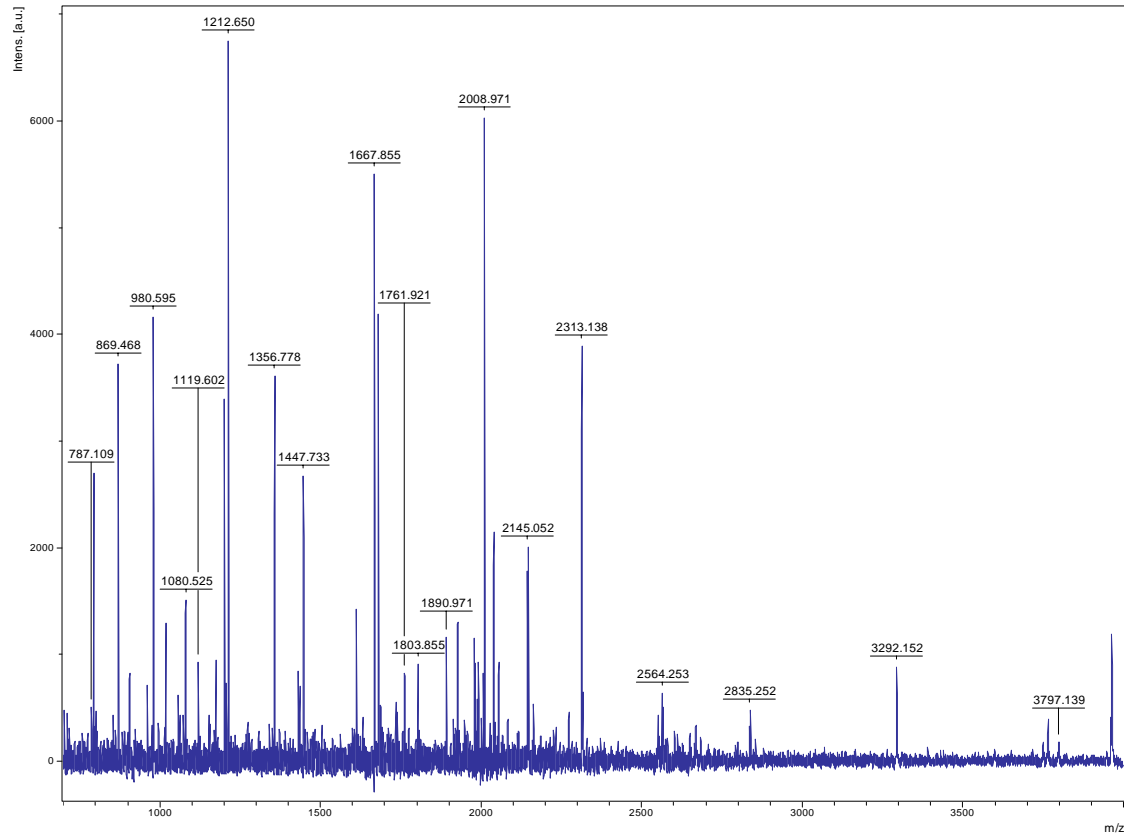

Match to: gi|50930099 Score: 181 Expect: 5.3e-14

### Matched peptides:

| Start - End | Observed  | Mr (expt) | Mr (calc) | Delta   | Miss Sequence                                           |
|-------------|-----------|-----------|-----------|---------|---------------------------------------------------------|
| 81 - 86     | 795.3319  | 794.3246  | 794.4075  | -0.0829 | 0 R.AYWVTR.S                                            |
| 87 - 106    | 2313.1133 | 2312.1060 | 2312.1437 | -0.0376 | 0 R.SLIAWNVDQDTSFLFYASR.D                               |
| 107 - 123   | 1803.8219 | 1802.8146 | 1802.7893 | 0.0253  | 0 R.DATMHVSDGAIHGYSK.I                                  |
| 124 - 140   | 1890.9245 | 1889.9172 | 1889.9370 | -0.0198 | 0 K.IELEPEHASLPDVAEK.F                                  |
| 152 - 163   | 1200.6940 | 1199.6867 | 1199.6761 | 0.0106  | 0 R.VPSSVDVASLVK.C                                      |
| 207 - 221   | 1761.9006 | 1760.8933 | 1760.8733 | 0.0200  | 0 K.DVDLYLWAPTAQDVR.V                                   |
| 240 - 251   | 1356.7431 | 1355.7358 | 1355.7197 | 0.0161  | 0 K.ELNGVWVSTVPR.Y                                      |
| 252 - 263   | 1667.8212 | 1666.8139 | 1666.7991 | 0.0149  | 1 R.YRENQYYLYEVK.V                                      |
| 275 - 283   | 1080.4622 | 1079.4549 | 1079.4706 | -0.0157 | 0 K.CLADDPYAR.G Carbamidomethyl (C)                     |
| 332 - 345   | 1610.6633 | 1609.6560 | 1609.6427 | 0.0133  | 0 R.DFSAHDSTVDCNSR.G Carbamidomethyl (C)                |
| 350 - 360   | 1212.6135 | 1211.6062 | 1211.5934 | 0.0128  | 0 R.AFTFQDSAGIR.H                                       |
| 436 - 447   | 1207.5627 | 1206.5554 | 1206.5265 | 0.0289  | 0 K.GSYASNPDGPSR.I                                      |
| 489 - 496   | 980.5409  | 979.5336  | 979.5491  | -0.0154 | 0 K.IVPGYYLR.R                                          |
| 574 - 590   | 1988.9319 | 1987.9246 | 1987.9315 | -0.0069 | 0 K.IYLYGEGWDFGEVAQNK.R                                 |
| 574 - 591   | 2145.0246 | 2144.0173 | 2144.0326 | -0.0153 | 1 K.IYLYGEGWDFGEVAQNK.R.G                               |
| 592 - 611   | 2038.9471 | 2037.9398 | 2037.9537 | -0.0139 | 0 R.GINASQINMSGTGIGSFNDR.I                              |
| 592 - 611   | 2054.9882 | 2053.9809 | 2053.9486 | 0.0323  | 0 R.GINASQINMSGTGIGSFNDR.I Oxidation (M)                |
| 652 - 669   | 1927.0072 | 1925.9999 | 1926.0210 | -0.0211 | 0 R.ELATYADHIQIAGLNK.D                                  |
| 723 - 734   | 1430.6764 | 1429.6691 | 1429.7235 | -0.0544 | 1 K.TPIGLSIDEKCR.I Acetyl (N-term); Carbamidomethyl (C) |
| 778 - 794   | 1978.9676 | 1977.9603 | 1977.9584 | 0.0019  | 0 K.LDFTYETNNWVGVLPPR.D                                 |
| 795 - 807   | 1678.8929 | 1677.8856 | 1677.8587 | 0.0270  | 1 R.DKNEENWHLIKPR.L                                     |
| 835 - 841   | 869.3900  | 868.3827  | 868.4443  | -0.0616 | 0 R.YSSPLFR.L                                           |
| 842 - 851   | 1119.5702 | 1118.5629 | 1118.5567 | 0.0062  | 0 R.LSTASDIEQR.V                                        |
| 944 - 953   | 1174.6768 | 1173.6695 | 1173.6618 | 0.0077  | 1 R.RTTAVFVQPR.C                                        |
| 945 - 953   | 1018.5455 | 1017.5382 | 1017.5607 | -0.0225 | 0 R.TTAVFVQPR.C                                         |



# Spot 1214

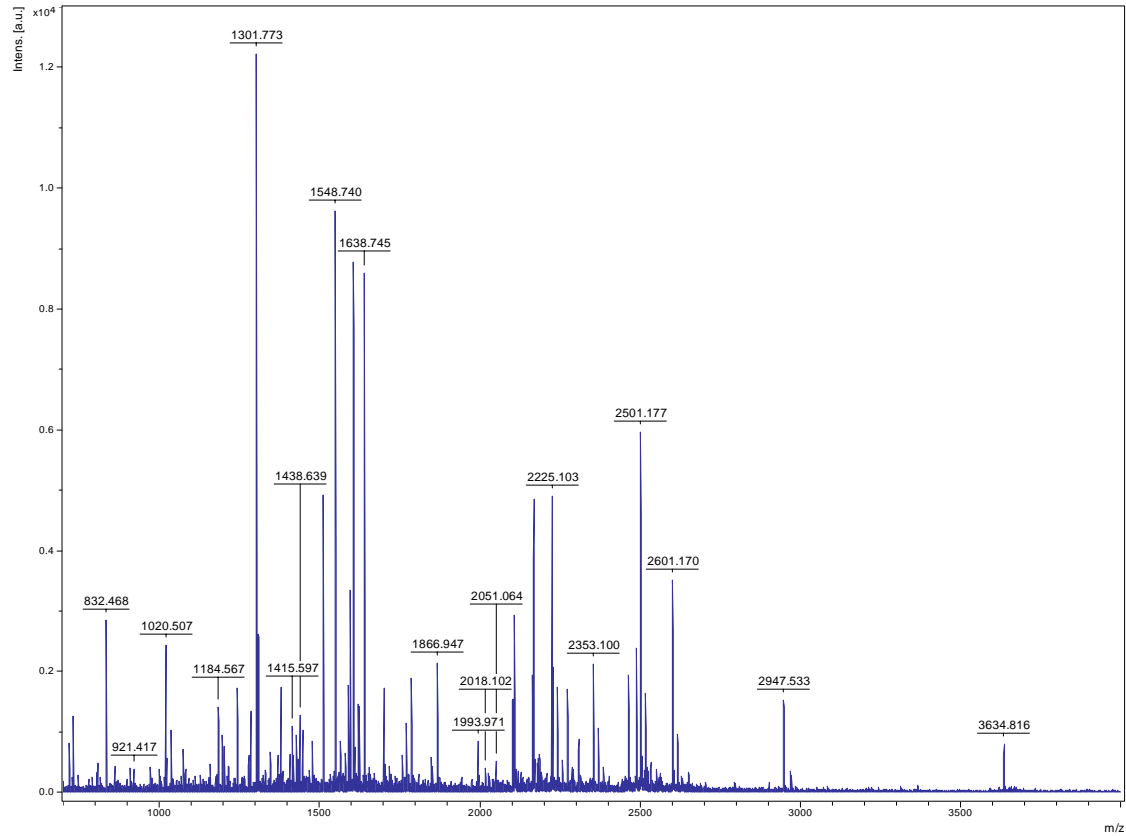

Match to: gj|13195430 Score: 327 Expect: 1.1e-27

## Matched peptides:

| Start - End | Observed  | Mr (expt) | Mr (calc) | ppm | Miss Sequence                                   |
|-------------|-----------|-----------|-----------|-----|-------------------------------------------------|
| 8 - 36      | 2947.5564 | 2946.5491 | 2946.4669 | 28  | 0 R.GVQGSVPPEEISSVLNSIDSSSTIASNIK.H             |
| 62 - 80     | 2353.1202 | 2352.1130 | 2352.0732 | 17  | 0 K.SVLDTLIMNWNATYDYDR.T                        |
| 62 - 80     | 2369.1036 | 2368.0964 | 2368.0681 | 12  | 0 K.SVLDTLIMNWNATYDYDR.T Oxidation (M)          |
| 85 - 97     | 1588.7571 | 1587.7498 | 1587.7392 | 7   | 0 K.QAYYLSMEFLQGR.A Gln->pyro-Glu (N-term Q)    |
| 85 - 97     | 1605.7850 | 1604.7777 | 1604.7657 | 8   | 0 K.QAYYLSMEFLQGR.A                             |
| 85 - 97     | 1621.7712 | 1620.7639 | 1620.7606 | 2   | 0 K.QAYYLSMEFLQGR.A Oxidation (M)               |
| 143 - 164   | 2488.2812 | 2487.2739 | 2487.2256 | 19  | 0 R.LASCFLDSLATLNPYAWGYGLR.Y                    |
| 177 - 197   | 2501.1952 | 2500.1880 | 2500.1329 | 22  | 0 K.DGQEEVAENWLEMGNPWEIVR.T                     |
| 177 - 197   | 2517.1904 | 2516.1831 | 2516.1278 | 22  | 0 K.DGQEEVAENWLEMGNPWEIVR.T Oxidation (M)       |
| 198 - 205   | 908.4795  | 907.4722  | 907.4651  | 8   | 0 R.TDVSYPVK.F                                  |
| 218 - 227   | 1184.5745 | 1183.5673 | 1183.5808 | -11 | 0 R.MHWIGGENIK.V                                |
| 218 - 227   | 1200.5740 | 1199.5667 | 1199.5757 | -7  | 0 R.MHWIGGENIK.V Oxidation (M)                  |
| 228 - 239   | 1308.7293 | 1307.7221 | 1307.7238 | -1  | 0 K.VVAHDPIPGYK.T                               |
| 242 - 247   | 718.3831  | 717.3759  | 717.3769  | -1  | 0 K.TTNNLR.L                                    |
| 248 - 280   | 3634.8371 | 3633.8299 | 3633.6648 | 45  | 0 R.LWSTTVPSPQDFLEAFNAGDHASAYEAHLNAEK.I         |
| 281 - 295   | 1700.7976 | 1699.7903 | 1699.7876 | 2   | 0 K.ICHVLYPGDESPEGK.V                           |
| 301 - 316   | 1849.9292 | 1848.9220 | 1848.9040 | 10  | 0 K.QQYTLCSASLQDIHAR.F Gln->pyro-Glu (N-term Q) |
| 301 - 316   | 1866.9588 | 1865.9515 | 1865.9305 | 11  | 0 K.QQYTLCSASLQDIHAR.F                          |
| 320 - 333   | 1594.7571 | 1593.7498 | 1593.7423 | 5   | 1 R.RAGDSLWEDFPSK.V                             |
| 321 - 333   | 1438.6505 | 1437.6432 | 1437.6412 | 1   | 0 R.AGDSLWEDFPSK.V                              |
| 334 - 352   | 2225.1213 | 2224.1140 | 2224.0803 | 15  | 0 K.VAVQMNDHTHTLCPILMR.I                        |
| 334 - 352   | 2241.1043 | 2240.0970 | 2240.0752 | 10  | 0 K.VAVQMNDHTHTLCPILMR.I Oxidation (M)          |
| 359 - 371   | 1548.7519 | 1547.7446 | 1547.7368 | 5   | 0 K.GLSWNEAWSITER.T                             |
| 372 - 387   | 1785.9334 | 1784.9262 | 1784.9308 | -3  | 0 R.TVAYTNHTVLPALAEK.W                          |
| 388 - 395   | 1020.5154 | 1019.5082 | 1019.5110 | -3  | 0 K.WSLDIMQK.L                                  |
| 388 - 395   | 1036.5063 | 1035.4990 | 1035.5059 | -7  | 0 K.WSLDIMQK.L Oxidation (M)                    |
| 407 - 418   | 1345.7134 | 1344.7061 | 1344.7323 | -19 | 0 K.IDGELMNIHSK.Y                               |
| 419 - 428   | 1126.5627 | 1125.5554 | 1125.5554 | 0   | 0 K.YGTEDTSLK.K                                 |
| 436 - 448   | 1426.7635 | 1425.7562 | 1425.7715 | -11 | 0 R.ILDNIDLPSIAK.L                              |
| 471 - 481   | 1215.6166 | 1214.6094 | 1214.6394 | -25 | 0 K.SLEPSVVEEK.T                                |
| 583 - 594   | 1378.6889 | 1377.6817 | 1377.6962 | -11 | 0 R.FCNPELSAHSK.W                               |
| 595 - 612   | 2103.0933 | 2102.0860 | 2102.0684 | 8   | 1 K.WIGSDDWVLTNDKLAELK.K                        |
| 613 - 625   | 1638.7576 | 1637.7503 | 1637.7321 | 11  | 1 K.KFADDEDLQSEWR.A                             |
| 614 - 625   | 1510.6495 | 1509.6423 | 1509.6372 | 3   | 0 K.FADDEDLQSEWR.A                              |
| 641 - 658   | 2027.0166 | 2026.0093 | 2026.0081 | 1   | 1 R.EKTGYIVSPDAMFDVQVK.R                        |
| 643 - 658   | 1769.8833 | 1768.8761 | 1768.8706 | 3   | 0 K.TGYIVSPDAMFDVQVK.R                          |
| 666 - 676   | 1284.7567 | 1283.7495 | 1283.7601 | -8  | 0 R.QLLNILGIVYR.Y Gln->pyro-Glu (N-term Q)      |
| 666 - 676   | 1301.7870 | 1300.7797 | 1300.7867 | -5  | 0 R.QLLNILGIVYR.Y                               |
| 687 - 695   | 1103.5811 | 1102.5738 | 1102.5883 | -13 | 1 K.DRINSFVPR.V                                 |
| 689 - 695   | 832.4719  | 831.4646  | 831.4603  | 5   | 0 R.INSFVPR.V                                   |
| 703 - 711   | 998.5367  | 997.5294  | 997.5233  | 6   | 0 K.AFATYVQAK.R                                 |
| 716 - 735   | 2168.1380 | 2167.1307 | 2167.1161 | 7   | 0 K.FTDDVAATVNHDPEDGLLK.V                       |
| 795 - 816   | 2464.2349 | 2463.2276 | 2463.1706 | 23  | 0 R.EEVGEENFFLFGAEAEHAGLR.K                     |
| 830 - 835   | 807.4338  | 806.4265  | 806.4286  | -3  | 1 R.FEEVKR.F                                    |
| 839 - 862   | 2601.1863 | 2600.1790 | 2600.1125 | 26  | 0 R.SGVFGTYNYDDLMSLEGNEGYGR.A                   |
| 839 - 862   | 2617.1785 | 2616.1712 | 2616.1075 | 24  | 0 R.SGVFGTYNYDDLMSLEGNEGYGR.A Oxidation (M)     |
| 863 - 881   | 2309.1102 | 2308.1029 | 2308.0722 | 13  | 1 R.ADYFLVGKDFPSYIECQEK.V                       |
| 871 - 881   | 1415.6058 | 1414.5985 | 1414.6075 | -6  | 0 K.DFPSYIECQEK.V                               |
| 871 - 884   | 1757.8217 | 1756.8144 | 1756.7978 | 9   | 1 K.DFPSYIECQEKVDK.A                            |
| 911 - 917   | 861.4490  | 860.4418  | 860.4392  | 3   | 0 R.THEYAK.D                                    |

# Spot 1216

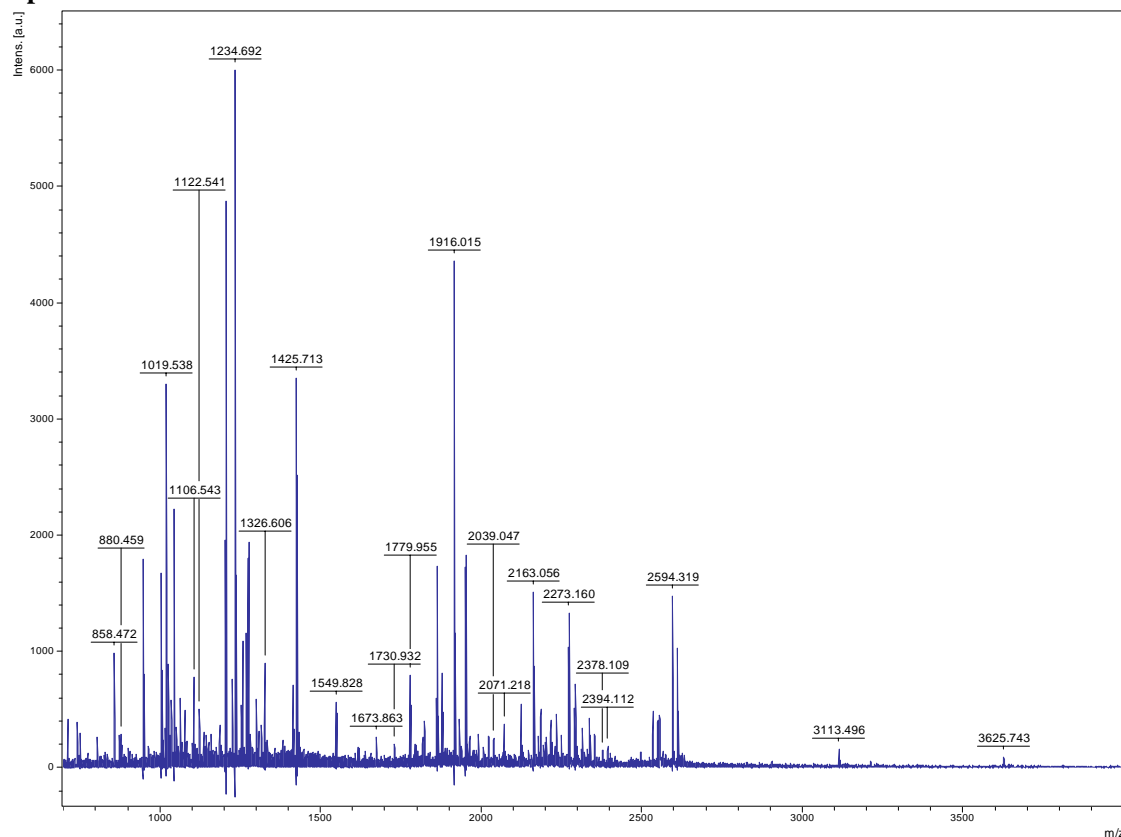

Match to: gj1196837 Score: 370 Expect: 5.4e-32

## Matched peptides:

| Start - End | Observed  | Mr (expt) | Mr (calc) | ppm | Miss Sequence                                |
|-------------|-----------|-----------|-----------|-----|----------------------------------------------|
| 1 - 12      | 1334.7006 | 1333.6933 | 1333.6408 | 39  | 1 -.MGETTGERALNR.L                           |
| 18 - 37     | 2201.0735 | 2200.0662 | 2200.1236 | -26 | 1 R.ERIGDSL SAHTNELVAVFSR.L                  |
| 20 - 37     | 1916.0150 | 1915.0077 | 1914.9799 | 15  | 0 R.IGDLSAHTNELVAVFSR.L                      |
| 20 - 43     | 2555.5325 | 2554.5252 | 2554.3503 | 68  | 1 R.IGDLSAHTNELVAVFSRLVNGQK.G                |
| 44 - 64     | 2337.1904 | 2336.1832 | 2336.1583 | 11  | 0 K.GMLQPHQIAEYNAAIPEGER.E                   |
| 44 - 66     | 2594.3186 | 2593.3113 | 2593.2958 | 6   | 1 K.GMLQPHQIAEYNAAIPEGERE.K.L                |
| 67 - 77     | 1258.7086 | 1257.7013 | 1257.6928 | 7   | 1 K.LKDSALEDVDLR.G                           |
| 105 - 124   | 2292.2023 | 2291.1950 | 2291.2049 | -4  | 0 R.INVSLQGVVEELVPEYLQFKE                    |
| 125 - 156   | 3625.7433 | 3624.7360 | 3624.7736 | -10 | 0 K.EQLVDGSTQNNFVLELDFEFPNASFPRLSLK.S        |
| 157 - 167   | 1204.6533 | 1203.6460 | 1203.6360 | 8   | 0 K.SIGNGVQFLNR.H                            |
| 173 - 188   | 2023.0541 | 2022.0468 | 2022.0397 | 4   | 1 K.LFHDKESMYPLLNFLR.A                       |
| 178 - 188   | 1382.7210 | 1381.7137 | 1381.7064 | 5   | 0 K.ESMYPLLNFLR.A                            |
| 194 - 202   | 1068.4778 | 1067.4705 | 1067.4562 | 13  | 0 K.GMTMMLNDR.I                              |
| 205 - 214   | 1043.5969 | 1042.5897 | 1042.5771 | 12  | 0 R.SLDALQGALR.K                             |
| 219 - 235   | 1951.9628 | 1950.9556 | 1950.9337 | 11  | 0 K.HLAGITADTPYSEFHHR.F                      |
| 236 - 243   | 963.4761  | 962.4689  | 962.5073  | -40 | 0 R.FOELGLEK.G                               |
| 244 - 251   | 949.4062  | 948.3989  | 948.3872  | 12  | 0 K.GWGDCAQR.V Carbamidomethyl (C)           |
| 317 - 325   | 1106.5435 | 1105.5362 | 1105.5260 | 9   | 0 R.AMENEMLLR.I                              |
| 326 - 336   | 1267.7576 | 1266.7504 | 1266.7408 | 8   | 1 R.IKQQGLNITPR.I                            |
| 328 - 336   | 1009.5550 | 1008.5477 | 1008.5352 | 12  | 0 K.QQGLNITPR.I Gln->pyro-Glu (N-term Q)     |
| 328 - 336   | 1026.5778 | 1025.5706 | 1025.5618 | 9   | 0 K.QQGLNITPR.I                              |
| 337 - 342   | 714.4877  | 713.4804  | 713.4800  | 1   | 0 R.ILIVTRL                                  |
| 343 - 355   | 1425.7130 | 1424.7057 | 1424.6831 | 16  | 0 R.LLPDAHGTTCGQR.L Carbamidomethyl (C)      |
| 343 - 358   | 1795.9303 | 1794.9230 | 1794.9047 | 10  | 1 R.LLPDAHGTTCGQRLEK.V Carbamidomethyl (C)   |
| 359 - 369   | 1275.7169 | 1274.7096 | 1274.7095 | 0   | 0 K.VLGTETHILR.V                             |
| 432 - 445   | 1549.8285 | 1548.8212 | 1548.8082 | 8   | 0 K.LGVTHCTIAHALEK.T Carbamidomethyl (C)     |
| 446 - 456   | 1414.7059 | 1413.6986 | 1413.6928 | 4   | 1 K.TKYPNSDLYWK.K                            |
| 494 - 512   | 2217.0133 | 2216.0060 | 2216.0031 | 1   | 0 K.ETVGGYESHMAFTMPGLYR.V                    |
| 513 - 523   | 1225.6539 | 1224.6466 | 1224.6503 | -3  | 0 R.VVHGIDVDPK.F                             |
| 524 - 544   | 2378.1091 | 2377.1018 | 2377.1300 | -12 | 0 K.FNIVSPGADMSIYFPFTESQK.R                  |
| 524 - 545   | 2534.2469 | 2533.2396 | 2533.2311 | 3   | 1 K.FNIVSPGADMSIYFPFTESQKR.L                 |
| 575 - 583   | 1062.6210 | 1061.6137 | 1061.6055 | 8   | 0 K.KPIHSMAR.L                               |
| 589 - 599   | 1234.6923 | 1233.6851 | 1233.6717 | 11  | 0 K.NLTGLVELYGR.N                            |
| 603 - 618   | 1779.9546 | 1778.9474 | 1778.9349 | 7   | 0 R.LQELVNLVVCGDHGK.E Carbamidomethyl (C)    |
| 603 - 621   | 2124.1252 | 2123.1179 | 2123.1045 | 6   | 1 R.LQELVNLVVCGDHGKESK.D Carbamidomethyl (C) |
| 632 - 646   | 1861.9605 | 1860.9533 | 1860.9305 | 12  | 0 K.MFNLIQYNLNHHR.W                          |
| 647 - 654   | 1005.5070 | 1004.4997 | 1004.4862 | 13  | 0 R.WISAQMNR.V                               |
| 657 - 662   | 751.3733  | 750.3660  | 750.3660  | -0  | 0 R.NGELYR.Y Carbamidomethyl (C)             |
| 663 - 668   | 857.3801  | 856.3728  | 856.3571  | 18  | 0 R.YICDMR.G Carbamidomethyl (C)             |
| 723 - 733   | 1253.6775 | 1252.6702 | 1252.6703 | -0  | 0 K.ASALLVEFFEK.C                            |
| 734 - 743   | 1326.6060 | 1325.5987 | 1325.5823 | 12  | 0 K.QCEDPNHWIK.I Carbamidomethyl (C)         |
| 744 - 751   | 858.4715  | 857.4643  | 857.4719  | -9  | 0 K.ISQGLQR.I                                |
| 777 - 783   | 880.4585  | 879.4513  | 879.4450  | 7   | 0 K.YVTNLDLR.R                               |
| 777 - 784   | 1036.5448 | 1035.5375 | 1035.5461 | -8  | 1 K.YVTNLDLR.E                               |
| 788 - 797   | 1299.7248 | 1298.7175 | 1298.7056 | 9   | 1 R.RYLEMLYALK.Y                             |
| 789 - 797   | 1143.6068 | 1142.5995 | 1142.6045 | -4  | 0 R.YLEMLYALK.Y                              |
| 801 - 816   | 1618.8553 | 1617.8481 | 1617.8284 | 12  | 0 K.MATTVPLAIEGEASTK.-                       |

## Spot 1218

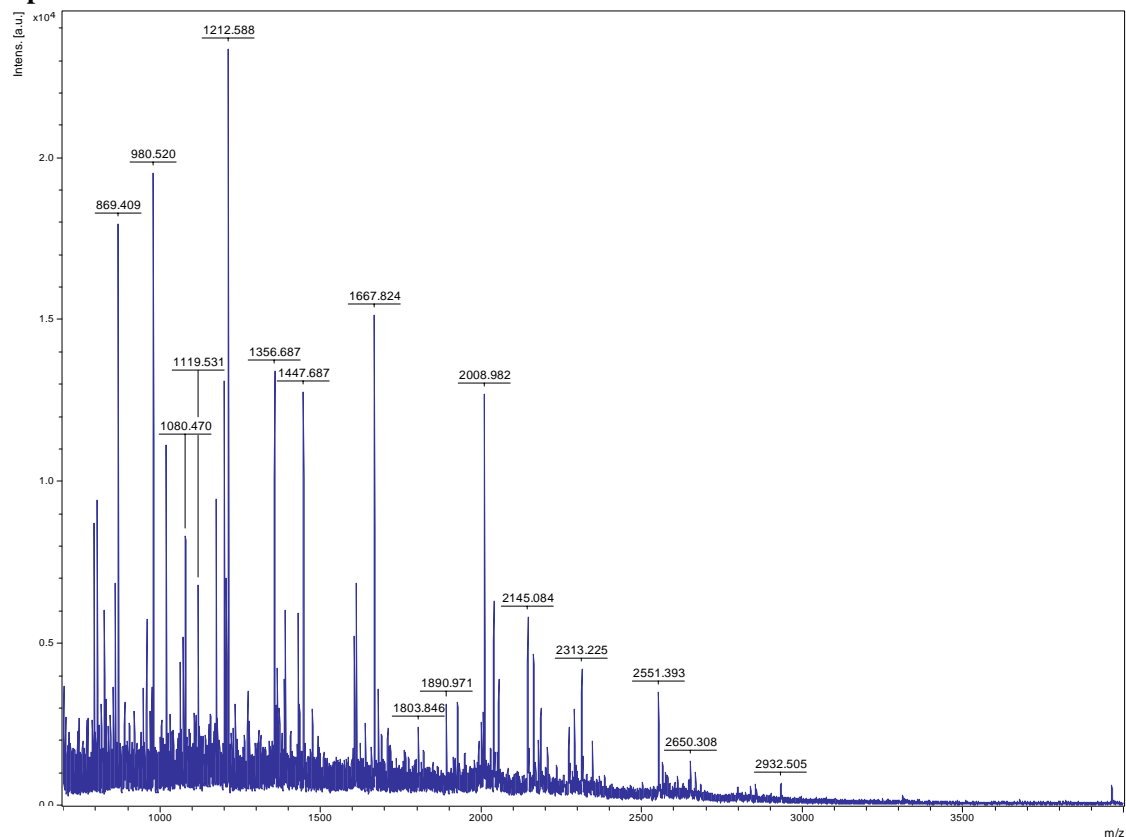

Match to: gj|38346454; Score: 287

### Matched peptides:

| Start - End | Observed | Mr (expt) | Mr (calc) | Delta | Miss Sequence                                 |
|-------------|----------|-----------|-----------|-------|-----------------------------------------------|
| 87 - 106    | 2313.23  | 2312.22   | 2312.14   | 0.08  | 0 SLIAWVNDQDTSLFLYASR                         |
| 107 - 123   | 1803.85  | 1802.84   | 1802.79   | 0.05  | 0 DATMHVSDGAIHGYSK                            |
| 124 - 140   | 1890.97  | 1889.97   | 1889.94   | 0.03  | 0 IELEPEHASLPDVAEK                            |
| 124 - 145   | 2551.39  | 2550.39   | 2550.31   | 0.08  | 1 IELEPEHASLPDVAEKFPFIR                       |
| 149 - 163   | 1604.89  | 1603.88   | 1603.89   | -0.01 | 1 TFRVPSSVDVAVSLVK                            |
| 164 - 176   | 1447.69  | 1446.68   | 1446.67   | 0.02  | 0 CQLAVASYDAHGR                               |
| 222 - 239   | 2006.08  | 2005.08   | 2005.03   | 0.04  | 0 VCFYDGPAGPLLQTVQLK                          |
| 240 - 251   | 1356.69  | 1355.68   | 1355.72   | -0.04 | 0 ELNGVWSVTVPR                                |
| 252 - 263   | 1667.82  | 1666.82   | 1666.80   | 0.02  | 1 YRENGVWSVTVPR                               |
| 264 - 274   | 1274.64  | 1273.64   | 1273.63   | 0.01  | 0 VYHPSTSQVEK                                 |
| 275 - 283   | 1080.47  | 1079.47   | 1079.47   | -0.00 | 0 CLADDPYAR                                   |
| 332 - 345   | 1610.69  | 1609.69   | 1609.64   | 0.04  | 0 DFSAHDSTVDCNSR                              |
| 332 - 349   | 2028.06  | 2027.06   | 2026.86   | 0.20  | 1 DFSAHDSTVDCNSRGGFR                          |
| 350 - 360   | 1212.59  | 1211.59   | 1211.59   | -0.01 | 0 AFTFQDSAGIR                                 |
| 393 - 401   | 1020.48  | 1019.48   | 1019.53   | -0.05 | 0 FVDEAQLAK                                   |
| 436 - 447   | 1207.53  | 1206.53   | 1206.53   | 0.00  | 0 GSYASNPDGPSR                                |
| 453 - 460   | 958.49   | 957.49    | 957.47    | 0.02  | 0 QMVQALNR Oxidation (M); Pyro-glu (N-term Q) |
| 453 - 460   | 959.47   | 958.47    | 958.50    | -0.04 | 0 QMVQALNR                                    |
| 453 - 460   | 975.48   | 974.47    | 974.50    | -0.02 | 0 QMVQALNR Oxidation (M)                      |
| 489 - 496   | 980.52   | 979.52    | 979.55    | -0.03 | 0 IVPGYLNR                                    |
| 498 - 521   | 2665.26  | 2664.25   | 2664.17   | 0.09  | 0 NVNGQIENSAAMNNTASEHFMVDR Oxidation (M)      |
| 522 - 535   | 1689.83  | 1688.83   | 1688.91   | -0.08 | 0 LIVDDLNLWAINYK                              |
| 574 - 591   | 2145.08  | 2144.08   | 2144.03   | 0.05  | 1 IYLYGEGWDFGVAQNKR                           |
| 592 - 611   | 2039.01  | 2038.01   | 2037.95   | 0.05  | 0 GINASQINMSGTGIGSFNDR                        |
| 592 - 611   | 2055.01  | 2054.01   | 2053.95   | 0.06  | 0 GINASQINMSGTGIGSFNDR Oxidation (M)          |
| 652 - 669   | 1927.03  | 1926.03   | 1926.02   | 0.01  | 0 ELATYADHIQIAGLNLK                           |
| 723 - 732   | 1072.55  | 1071.55   | 1071.58   | -0.03 | 0 TPIGLSIDEK                                  |
| 723 - 734   | 1388.69  | 1387.69   | 1387.71   | -0.02 | 1 TPIGLSIDEKCR                                |
| 795 - 807   | 1678.89  | 1677.89   | 1677.86   | 0.03  | 1 DKNEENWHLIKPR                               |
| 808 - 817   | 1200.66  | 1199.65   | 1199.67   | -0.01 | 0 LENPSFRPLK                                  |
| 835 - 841   | 869.41   | 868.41    | 868.44    | -0.04 | 0 YSSPLFR                                     |
| 842 - 851   | 1119.53  | 1118.53   | 1118.56   | -0.03 | 0 LSTASDIEQR                                  |
| 852 - 871   | 2185.13  | 2184.12   | 2184.15   | -0.03 | 1 VRFHNTGPSMVPGVVMSIK Oxidation (M)           |
| 944 - 953   | 1174.64  | 1173.64   | 1173.66   | -0.02 | 1 RTTAVFVQPR                                  |
| 945 - 953   | 1018.53  | 1017.52   | 1017.56   | -0.04 | 0 TTAVFVQPR                                   |

## Spot 1221

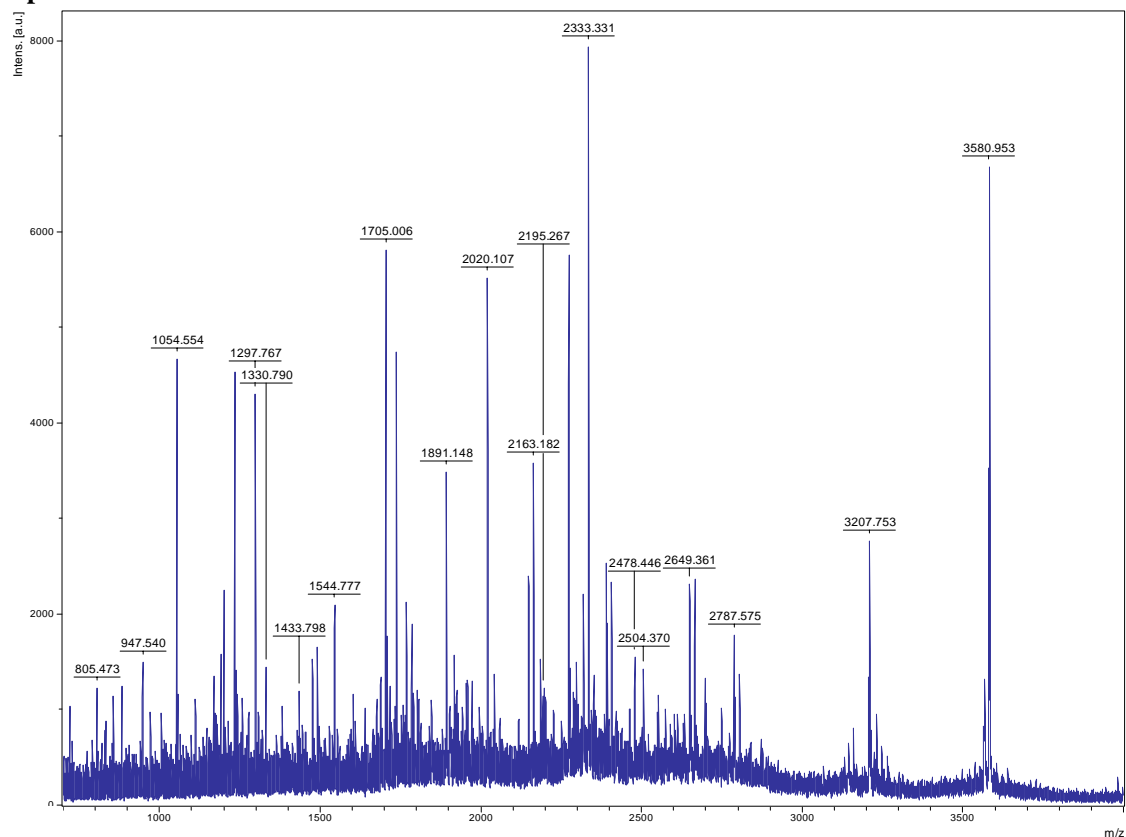

Match to: gi|51090745 Score: 117 Expect: 6.7e-07

### Matched peptides:

| Start - End | Observed  | Mr (expt) | Mr (calc) | Delta  | Miss Sequence                                                        |
|-------------|-----------|-----------|-----------|--------|----------------------------------------------------------------------|
| 34 - 44     | 971.5848  | 970.5775  | 970.5195  | 0.0580 | 0 R.ASASAAAVAPR.R                                                    |
| 53 - 74     | 2390.2993 | 2389.2920 | 2389.1623 | 0.1297 | 0 R.VVITGMGLVSVFGNDVDAYYDR.L                                         |
| 53 - 74     | 2406.3242 | 2405.3169 | 2405.1572 | 0.1597 | 0 R.VVITGMGLVSVFGNDVDAYYDR.L Oxidation (M)                           |
| 75 - 87     | 1297.7675 | 1296.7602 | 1296.7037 | 0.0565 | 0 R.LLAGESGIGPIDR.F                                                  |
| 75 - 96     | 2333.3313 | 2332.3240 | 2332.1811 | 0.1429 | 1 R.LLAGESGIGPIDRFDASNFPT.R.F                                        |
| 88 - 96     | 1054.5543 | 1053.5470 | 1053.4879 | 0.0591 | 0 R.FDASNFPT.R.F                                                     |
| 103 - 116   | 1544.7770 | 1543.7697 | 1543.6902 | 0.0795 | 1 R.GFSSEGYIDGNDR.R                                                  |
| 117 - 123   | 947.5402  | 946.5329  | 946.4654  | 0.0674 | 1 R.RLDDCLR.Y Carbamidomethyl (C)                                    |
| 153 - 177   | 2478.4465 | 2477.4393 | 2477.2834 | 0.1558 | 0 R.AGVLVGTGMGGTLVTSFGVQNLIEK.G Oxidation (M)                        |
| 232 - 259   | 2787.5750 | 2786.5677 | 2786.4206 | 0.1471 | 1 R.RGEADVMIAGGTEAAIPIGVGGFVACR.A Carbamidomethyl (C)                |
| 232 - 259   | 2803.5833 | 2802.5760 | 2802.4155 | 0.1604 | 1 R.RGEADVMIAGGTEAAIPIGVGGFVACR.A Carbamidomethyl (C); Oxidation (M) |
| 270 - 279   | 1231.6448 | 1230.6375 | 1230.5741 | 0.0634 | 0 K.TASRPWDQDR.D                                                     |
| 303 - 326   | 2649.3608 | 2648.3536 | 2648.1999 | 0.1537 | 0 R.DAPIAEYLGGAVNCDAVHMTDPR.S Carbamidomethyl (C)                    |
| 303 - 326   | 2665.3779 | 2664.3707 | 2664.1948 | 0.1759 | 0 R.DAPIAEYLGGAVNCDAVHMTDPR.S Carbamidomethyl (C); Oxidation (M)     |
| 338 - 372   | 3580.9531 | 3579.9458 | 3579.7804 | 0.1655 | 0 K.QLADAGVAPPEVNYNAHATSTLAGDLAEVNAIR.Q                              |
| 373 - 382   | 1190.6935 | 1189.6862 | 1189.6342 | 0.0520 | 1 R.QVFKDPSEIK.I                                                     |
| 388 - 407   | 1956.1024 | 1955.0951 | 1954.9968 | 0.0984 | 0 K.SMIGHCLGAAGGLEAIATVK.A Carbamidomethyl (C)                       |
| 408 - 436   | 3207.7529 | 3206.7457 | 3206.6036 | 0.1421 | 0 K.AITTGWVHPSINQFNPEPAVEFDTPVNVK.K                                  |

Match to: gi|108706457 Score: 75 Expect: 0.002

### Matched peptides:

| Start - End | Observed  | Mr (expt) | Mr (calc) | Delta  | Miss Sequence                         |
|-------------|-----------|-----------|-----------|--------|---------------------------------------|
| 2 - 21      | 1735.9635 | 1734.9562 | 1734.9012 | 0.0550 | 0 M.SLSTVNHAAAAAAAAAGPGK.S            |
| 22 - 34     | 1231.6448 | 1230.6375 | 1230.6356 | 0.0019 | 0 K.SFSAAPAAPSVR.L                    |
| 82 - 89     | 882.6025  | 881.5952  | 881.5334  | 0.0618 | 0 K.LVDVLAAPR.F                       |
| 167 - 181   | 1705.0062 | 1703.9989 | 1703.9107 | 0.0883 | 0 R.AHLLFDLHQAVDGLR.E                 |
| 236 - 243   | 1006.5324 | 1005.5251 | 1005.4443 | 0.0808 | 0 R.FEGFEYSK.S                        |
| 256 - 278   | 2698.5857 | 2697.5784 | 2697.4125 | 0.1659 | 1 R.FAERLEPFIADTVHLLNESIQQK.K         |
| 260 - 278   | 2195.2673 | 2194.2601 | 2194.1633 | 0.0967 | 0 R.LEPFIADTVHLLNESIQQK.K             |
| 336 - 354   | 2020.1068 | 2019.0995 | 2018.9948 | 0.1047 | 0 R.VGSGPFPTELFEGEGDLLR.K             |
| 336 - 355   | 2148.2021 | 2147.1949 | 2147.0898 | 0.1051 | 1 R.VGSGPFPTELFEGEGDLLR.K.S           |
| 369 - 379   | 1330.7900 | 1329.7828 | 1329.7227 | 0.0601 | 1 R.RCGWLDIVALK.Y Carbamidomethyl (C) |
| 418 - 434   | 1917.1075 | 1916.1003 | 1915.9891 | 0.1112 | 0 K.LQSPGDLDTLEQVQVK.Y                |
| 465 - 482   | 1891.1482 | 1890.1409 | 1890.0362 | 0.1047 | 0 R.IEELVGVPHYIGVGPGR.D               |

## Spot 1222

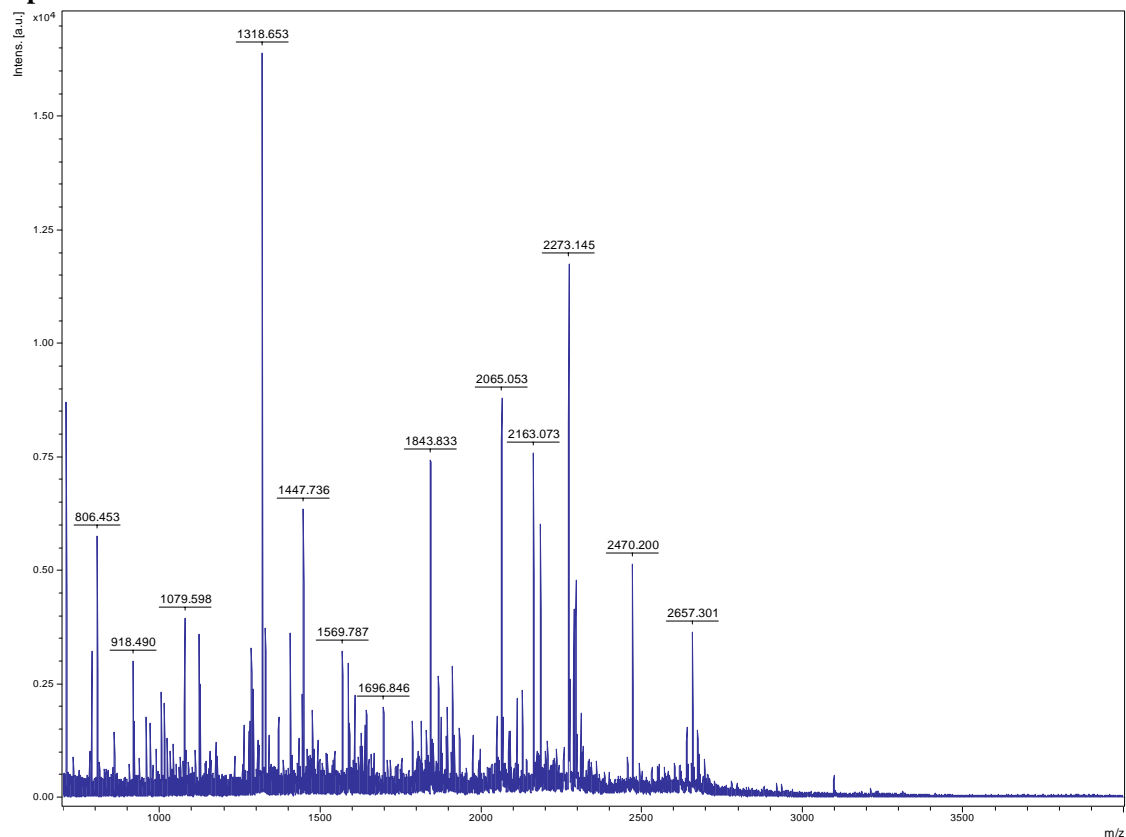

Match to: gi|77548284; Score: 222

### Matched peptides:

| Start - End | Observed | Mr (expt) | Mr (calc) | Delta | Miss Sequence                            |
|-------------|----------|-----------|-----------|-------|------------------------------------------|
| 38 - 48     | 1281.63  | 1280.62   | 1280.60   | 0.02  | 0 APEIDEDLHSR                            |
| 49 - 55     | 806.45   | 805.45    | 805.44    | 0.01  | 0 QLAVYGR                                |
| 49 - 59     | 1278.67  | 1277.67   | 1277.64   | 0.02  | 1 QLAVYGRETMK Pyro-glu (N-term Q)        |
| 163 - 181   | 2273.13  | 2272.13   | 2272.07   | 0.06  | 0 AVEFDSYCHNHQPPIAFIK                    |
| 262 - 282   | 2470.19  | 2469.19   | 2469.14   | 0.04  | 0 NARPYSFTLEEDTTSYGTYVR                  |
| 302 - 317   | 1813.90  | 1812.89   | 1812.86   | 0.03  | 1 DAIKEPGEFLMSDFSK                       |
| 302 - 317   | 1829.88  | 1828.88   | 1828.86   | 0.02  | 1 DAIKEPGEFLMSDFSK Oxidation (M)         |
| 340 - 352   | 1447.73  | 1446.73   | 1446.72   | 0.01  | 1 RFIAGSSDDVQR                           |
| 341 - 352   | 1291.63  | 1290.63   | 1290.62   | 0.01  | 0 FPIAGSSDDVQR                           |
| 376 - 385   | 1124.60  | 1123.59   | 1123.59   | 0.01  | 0 LLHFFASGSR                             |
| 386 - 405   | 2063.09  | 2062.09   | 2062.06   | 0.03  | 0 AVLNPMAAMFGGIVGQEVVK 2 Oxidation (M)   |
| 443 - 456   | 1569.78  | 1568.78   | 1568.78   | -0.01 | 0 YDAQISVFGSNLQK                         |
| 463 - 477   | 1628.83  | 1627.83   | 1627.81   | 0.02  | 0 IFMVGSGALGCEFLK                        |
| 463 - 477   | 1644.81  | 1643.81   | 1643.81   | 0.01  | 0 IFMVGSGALGCEFLK Oxidation (M)          |
| 478 - 491   | 1519.78  | 1518.78   | 1518.73   | 0.05  | 0 NLALMGISCNQNGK                         |
| 513 - 520   | 957.49   | 956.49    | 956.47    | 0.02  | 0 DWNIGQPK                               |
| 535 - 543   | 1079.60  | 1078.59   | 1078.59   | 0.01  | 0 LHVEALQNR                              |
| 580 - 596   | 1911.00  | 1910.00   | 1910.00   | 0.00  | 0 CVYFQKPLLESGLGAK                       |
| 597 - 619   | 2657.29  | 2656.29   | 2656.24   | 0.05  | 1 CNTQMVIPHLTENYGASRDPPPEK               |
| 597 - 619   | 2673.29  | 2672.29   | 2672.23   | 0.06  | 1 CNTQMVIPHLTENYGASRDPPPEK Oxidation (M) |
| 651 - 670   | 2065.04  | 2064.04   | 2064.03   | 0.01  | 0 TPTEVNAFLSNPGGYATVAR                   |
| 684 - 690   | 918.49   | 917.49    | 917.46    | 0.02  | 0 VIECLER                                |
| 691 - 704   | 1843.82  | 1842.82   | 1842.80   | 0.02  | 1 EKCETFQDCITWAR                         |
| 693 - 704   | 1586.69  | 1585.69   | 1585.67   | 0.03  | 0 CETFQDCITWAR                           |
| 705 - 714   | 1318.65  | 1317.65   | 1317.64   | 0.01  | 1 LKFEDYFSNR                             |
| 707 - 714   | 1077.52  | 1076.52   | 1076.46   | 0.06  | 0 FEDYFSNR                               |
| 783 - 798   | 1786.92  | 1785.92   | 1785.93   | -0.02 | 1 MAEAVDKVIVPDFQPK                       |
| 790 - 798   | 1042.60  | 1041.60   | 1041.59   | 0.01  | 0 VIVPDFQPK                              |
| 871 - 881   | 1305.69  | 1304.69   | 1304.70   | -0.01 | 1 NYSIPEVDKLLK                           |
| 911 - 922   | 1329.70  | 1328.70   | 1328.68   | 0.02  | 1 VLGGGHKVEDYR                           |
| 946 - 956   | 1444.75  | 1443.75   | 1443.64   | 0.11  | 0 HQDMAWTVWDR                            |
| 1011 - 1021 | 1286.71  | 1285.71   | 1285.70   | 0.01  | 1 EVAKVEVPPYR                            |
| 1015 - 1021 | 859.48   | 858.48    | 858.46    | 0.02  | 0 VEVPPYR                                |
| 1015 - 1022 | 1015.57  | 1014.56   | 1014.56   | 0.00  | 1 VEVPPYRR                               |

# Spot 1224

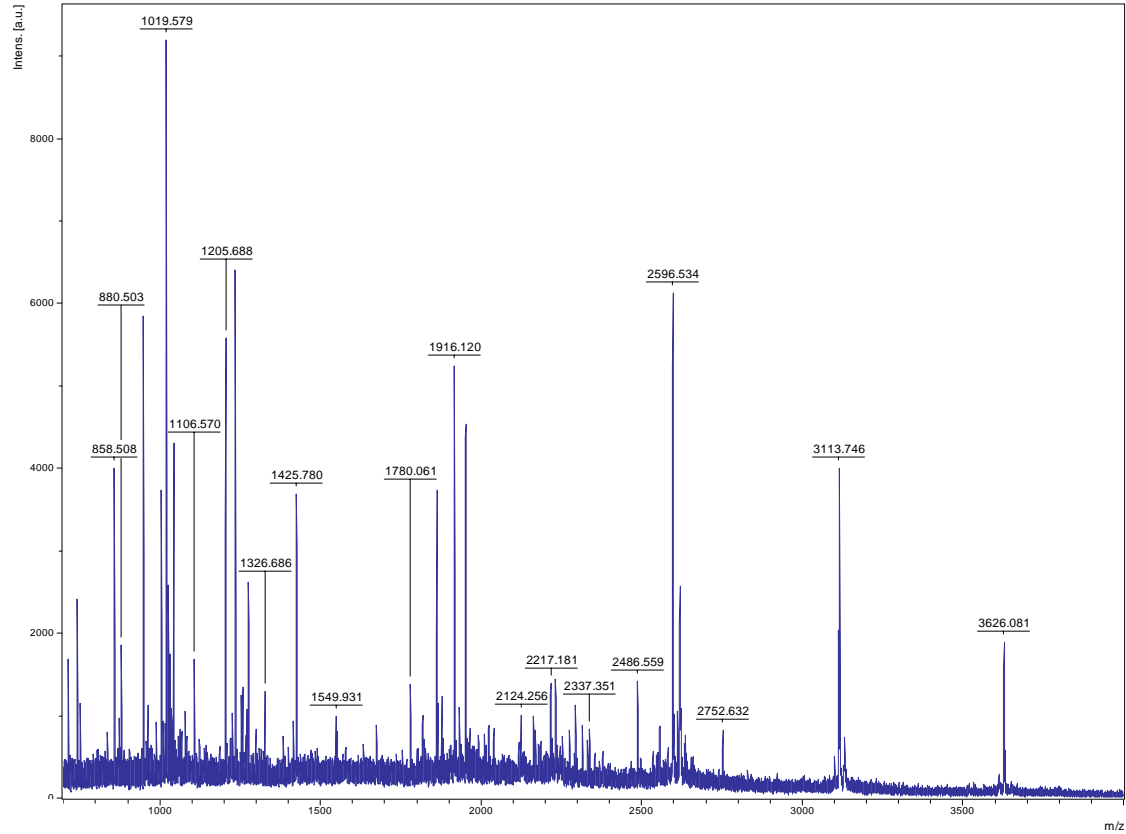

Match to: gi|3915054 Score: 187 Expect: 5.3e-13

## Matched peptides:

| Start - End | Observed  | Mr (expt) | Mr (calc) | Delta   | Miss Sequence                                                     |
|-------------|-----------|-----------|-----------|---------|-------------------------------------------------------------------|
| 20 - 37     | 1916.0487 | 1915.0414 | 1914.9799 | 0.0616  | 0 R.IGDLSAHTNELVAVFSR.L                                           |
| 44 - 64     | 2337.2121 | 2336.2048 | 2336.1582 | 0.0466  | 0 K.GMLQPHQIAEYNAAIPEGER.E                                        |
| 44 - 66     | 2594.3190 | 2593.3117 | 2593.2958 | 0.0159  | 1 K.GMLQPHQIAEYNAAIPEGERE.K.L                                     |
| 44 - 66     | 2610.2902 | 2609.2829 | 2609.2907 | -0.0078 | 1 K.GMLQPHQIAEYNAAIPEGERE.K.L Oxidation (M)                       |
| 67 - 77     | 1258.7382 | 1257.7309 | 1257.6928 | 0.0381  | 1 K.LKDSALEDLVLR.G                                                |
| 105 - 124   | 2292.2294 | 2291.2221 | 2291.2048 | 0.0173  | 0 R.INVSQLGVEELVPEYLFQK.E                                         |
| 125 - 156   | 3625.7175 | 3624.7102 | 3624.7735 | -0.0633 | 0 R.EQLVDGSTQNNFVLELDFEFPNASFPRPSLSK.S                            |
| 205 - 214   | 1043.6029 | 1042.5956 | 1042.5771 | 0.0186  | 0 R.SLDALQGALR.K                                                  |
| 219 - 235   | 1951.9959 | 1950.9886 | 1950.9336 | 0.0550  | 0 K.HLAGITADTPYSEFHHR.F                                           |
| 244 - 251   | 949.3867  | 948.3794  | 948.3872  | -0.0078 | 0 K.GWGDCAQR.V Carbamidomethyl (C)                                |
| 252 - 273   | 2486.3733 | 2485.3660 | 2485.3791 | -0.0131 | 1 R.VRETIHLLLDLEAPEPSALEK.F                                       |
| 254 - 273   | 2231.2418 | 2230.2345 | 2230.2096 | 0.0249  | 0 R.ETIHLLLDLEAPEPSALEK.F                                         |
| 317 - 325   | 1106.5509 | 1105.5436 | 1105.5260 | 0.0177  | 0 R.AMENEMLLR.I                                                   |
| 317 - 325   | 1122.5657 | 1121.5584 | 1121.5209 | 0.0376  | 0 R.AMENEMLLR.I Oxidation (M)                                     |
| 328 - 336   | 1026.5789 | 1025.5716 | 1025.5618 | 0.0099  | 0 K.QQGLNITPR.I                                                   |
| 337 - 342   | 714.4091  | 713.4018  | 713.4799  | -0.0781 | 0 R.ILVTRL                                                        |
| 343 - 355   | 1425.7487 | 1424.7414 | 1424.6830 | 0.0584  | 0 R.LLPDAHGTTCGQR.L Carbamidomethyl (C)                           |
| 359 - 369   | 1275.7641 | 1274.7568 | 1274.7095 | 0.0473  | 0 K.VLGEHTHILR.V                                                  |
| 426 - 445   | 2314.2212 | 2313.2139 | 2313.2085 | 0.0054  | 1 R.CLLAHKLVGTHCTIAHALEK.T Acetyl (N-term); 2 Carbamidomethyl (C) |
| 432 - 445   | 1549.9031 | 1548.8958 | 1548.8082 | 0.0876  | 0 K.LGVTHCTIAHALEK.T Carbamidomethyl (C)                          |
| 446 - 456   | 1414.7806 | 1413.7733 | 1413.6928 | 0.0805  | 1 K.TKYPNSDLYWK.K                                                 |
| 494 - 512   | 2217.0741 | 2216.0668 | 2216.0030 | 0.0638  | 0 K.ETVGYQESHMAFTMPGLYR.V                                         |
| 513 - 523   | 1225.7351 | 1224.7278 | 1224.6502 | 0.0776  | 0 R.VVHGIDVDFPK.F                                                 |
| 545 - 567   | 2752.4151 | 2751.4078 | 2751.4079 | -0.0000 | 1 K.RLTSLHLEIEELLFSDVENTEHK.F                                     |
| 546 - 567   | 2596.3033 | 2595.2960 | 2595.3067 | -0.0107 | 0 R.LTSLHLEIEELLFSDVENTEHK.F                                      |
| 575 - 583   | 1062.6139 | 1061.6066 | 1061.6055 | 0.0011  | 0 K.KPIIFSMAR.L                                                   |
| 575 - 583   | 1078.6134 | 1077.6061 | 1077.6004 | 0.0057  | 0 K.KPIIFSMAR.L Oxidation (M)                                     |
| 603 - 618   | 1780.0201 | 1779.0128 | 1778.9348 | 0.0780  | 0 R.LQELVNLVVCGDHGK.E Carbamidomethyl (C)                         |
| 603 - 621   | 2124.1458 | 2123.1385 | 2123.1044 | 0.0341  | 1 R.LQELVNLVVCGDHGKESK.D Carbamidomethyl (C)                      |
| 632 - 646   | 1861.9936 | 1860.9863 | 1860.9304 | 0.0559  | 0 K.MFNLEIQYNLNGHIR.W                                             |
| 647 - 654   | 1005.5055 | 1004.4982 | 1004.4862 | 0.0121  | 0 R.WISQMN.R.V                                                    |
| 657 - 662   | 751.3134  | 750.3061  | 750.3660  | -0.0599 | 0 R.NGELYR.Y                                                      |
| 723 - 733   | 1253.7306 | 1252.7233 | 1252.6703 | 0.0531  | 0 K.ASALLVEFFEK.C                                                 |
| 734 - 743   | 1326.6604 | 1325.6531 | 1325.5823 | 0.0709  | 0 K.CQEDPNHWIK.I Carbamidomethyl (C)                              |
| 744 - 751   | 858.4166  | 857.4093  | 857.4719  | -0.0626 | 0 K.ISQGLQR.I                                                     |
| 777 - 783   | 880.4339  | 879.4266  | 879.4450  | -0.0184 | 0 K.YVTNLD.R                                                      |
| 788 - 797   | 1299.7795 | 1298.7722 | 1298.7056 | 0.0666  | 1 R.RYLEMLYALK.Y                                                  |

## Spot 1229

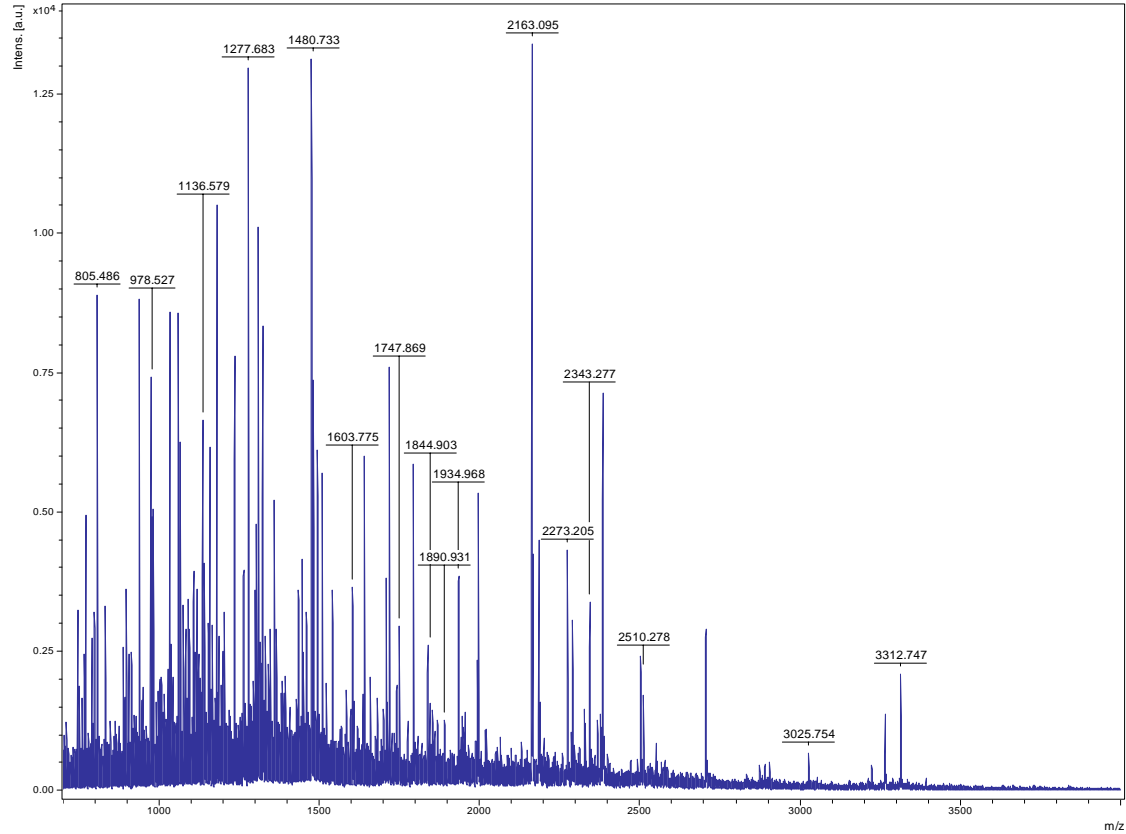

Match to: gj|34906196; Score: 114

### Matched peptides:

| Start - End | Observed | Mr (expt) | Mr (calc) | Delta | Miss Sequence                 |
|-------------|----------|-----------|-----------|-------|-------------------------------|
| 22 - 33     | 1358.69  | 1357.69   | 1357.72   | -0.03 | 1 GIDVVLNEESKR                |
| 34 - 46     | 1520.74  | 1519.74   | 1519.75   | -0.00 | 1 ETPAIVCFGDKQR               |
| 74 - 82     | 1135.56  | 1134.56   | 1134.57   | -0.01 | 1 KYSDPELQR                   |
| 75 - 82     | 1007.53  | 1006.53   | 1006.47   | 0.06  | 0 YSDPELQR                    |
| 83 - 90     | 936.53   | 935.53    | 935.49    | 0.04  | 0 DIAAFPR                     |
| 91 - 104    | 1480.73  | 1479.73   | 1479.75   | -0.02 | 0 VSEGPDPPLVHAR               |
| 127 - 153   | 3025.75  | 3024.75   | 3024.47   | 0.28  | 0 GIAESNLNTAVVDCGIPVYFTDLQR   |
| 155 - 169   | 1540.82  | 1539.82   | 1539.84   | -0.02 | 0 AVLDAATIAGLCPLR             |
| 220 - 227   | 974.52   | 973.52    | 973.50    | 0.02  | 0 ILSHAYDR                    |
| 252 - 259   | 978.53   | 977.52    | 977.49    | 0.03  | 0 IDVYQNR                     |
| 306 - 313   | 888.56   | 887.56    | 887.51    | 0.05  | 0 ISASILER                    |
| 321 - 343   | 2343.28  | 2342.28   | 2342.19   | 0.09  | 0 ALAEAGLTENVHFVEVVGSGSR      |
| 350 - 360   | 1322.66  | 1321.66   | 1321.70   | -0.05 | 1 ILTDFGKEPR                  |
| 435 - 455   | 2327.19  | 2326.19   | 2326.13   | 0.06  | 0 SNTFQVDVTVYDTGDLQISPK       |
| 456 - 471   | 1680.84  | 1679.84   | 1679.85   | -0.02 | 1 ISTYTVGPFNPGKGDK            |
| 597 - 609   | 1597.74  | 1596.74   | 1596.75   | -0.01 | 1 AVEKEYEMALQDR Oxidation (M) |
| 619 - 629   | 1346.62  | 1345.62   | 1345.60   | 0.02  | 0 NAVESYVYDMR                 |
| 636 - 645   | 1201.63  | 1200.63   | 1200.53   | 0.10  | 0 YNDFVTAEDK                  |
| 689 - 695   | 1043.53  | 1042.53   | 1042.45   | 0.07  | 1 YKEWMDR Oxidation (M)       |
| 696 - 710   | 1740.82  | 1739.82   | 1739.83   | -0.01 | 0 GPSIDQLAYCINSFR             |
| 731 - 743   | 1603.78  | 1602.77   | 1602.78   | -0.01 | 0 VINQCSEAEVWLR               |

# Spot 1230

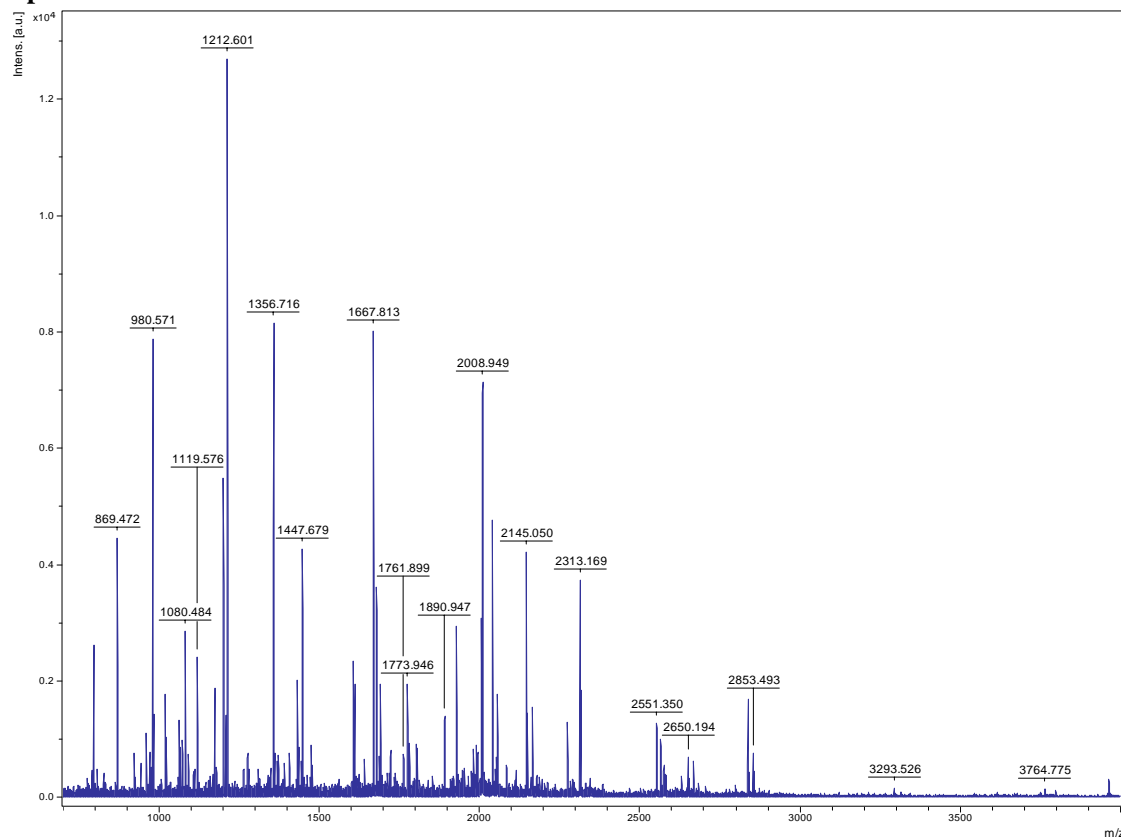

Match to: gi|3172048 Score: 292 Expect: 3.7e-26

## Matched peptides:

| Start - End | Observed  | Mr (expt) | Mr (calc) | ppm | Miss Sequence                                  |
|-------------|-----------|-----------|-----------|-----|------------------------------------------------|
| 93 - 112    | 2313.1690 | 2312.1617 | 2312.1437 | 8   | 0 R.SLIAWNVDQDTSFLYASR.D                       |
| 113 - 129   | 1803.8086 | 1802.8013 | 1802.7894 | 7   | 0 R.DATMHVSDGAIHGYDSKI                         |
| 130 - 146   | 1890.9470 | 1889.9398 | 1889.9370 | 1   | 0 K.IELEPEHASLPDVAEK.F                         |
| 130 - 151   | 2551.3501 | 2550.3428 | 2550.3118 | 12  | 1 K.IELEPEHASLPDVAEKFPFIR.S                    |
| 155 - 169   | 1604.9071 | 1603.8998 | 1603.8934 | 4   | 1 R.TFRVPSVDVASLVK.C                           |
| 170 - 182   | 1447.6789 | 1446.6716 | 1446.6674 | 3   | 0 K.CQLAVASYDAHGR.H                            |
| 213 - 227   | 1761.8993 | 1760.8920 | 1760.8734 | 11  | 0 K.DVDLYLWAPTAQDVR.V                          |
| 228 - 245   | 2006.0313 | 2005.0240 | 2005.0343 | -5  | 0 R.VCFYDGPAGPLLQTVQLK.E                       |
| 246 - 257   | 1356.7161 | 1355.7088 | 1355.7198 | -8  | 0 K.ELNGVWVSVTPR.Y                             |
| 270 - 280   | 1274.6296 | 1273.6223 | 1273.6303 | -6  | 0 K.VYHPSTSQVEK.C                              |
| 281 - 289   | 1080.4844 | 1079.4771 | 1079.4706 | 6   | 0 K.CLADDPYAR.G                                |
| 338 - 351   | 1610.6567 | 1609.6494 | 1609.6427 | 4   | 0 R.DFSAHDSTVDCNSR.G                           |
| 399 - 422   | 2576.3531 | 2575.3458 | 2575.3183 | 11  | 0 K.LSAAGLTHVHLLPSHFHVASVDDNK.S                |
| 427 - 435   | 1020.5406 | 1019.5333 | 1019.5287 | 4   | 0 K.FVDEAQLAK.L                                |
| 470 - 481   | 1207.5367 | 1206.5294 | 1206.5265 | 2   | 0 K.GSYASNPDPSPR.I                             |
| 487 - 494   | 942.4976  | 941.4903  | 941.4753  | 16  | 0 R.QMVQALNR.I Gln->pyro-Glu (N-term Q)        |
| 487 - 494   | 959.5282  | 958.5209  | 958.5018  | 20  | 0 R.QMVQALNR.I                                 |
| 487 - 494   | 975.5249  | 974.5177  | 974.4967  | 21  | 0 R.QMVQALNR.I Oxidation (M)                   |
| 523 - 530   | 980.5711  | 979.5639  | 979.5491  | 15  | 0 K.IVPGYYLR.R                                 |
| 575 - 583   | 1091.5533 | 1090.5460 | 1090.5303 | 14  | 0 R.FDLMGHIMK.S                                |
| 608 - 624   | 1988.9387 | 1987.9314 | 1987.9316 | -0  | 0 K.IYLYGEGWDFGEVAQNK.R                        |
| 608 - 625   | 2145.0500 | 2144.0427 | 2144.0327 | 5   | 1 K.IYLYGEGWDFGEVAQNK.R.G                      |
| 626 - 645   | 2038.9687 | 2037.9615 | 2037.9538 | 4   | 0 R.GINASQINMSGTGIGSFNDR.I                     |
| 626 - 645   | 2054.9575 | 2053.9503 | 2053.9487 | 1   | 0 R.GINASQINMSGTGIGSFNDR.I Oxidation (M)       |
| 648 - 684   | 3960.8674 | 3959.8601 | 3959.7987 | 16  | 0 R.DSVNGGNPFGNPLQQGFSTGLFLEPNNGYYQGNEADTR.R   |
| 686 - 703   | 1927.0272 | 1926.0199 | 1926.0210 | -1  | 0 R.ELATYADHIQIGLAGNLK.D                       |
| 686 - 708   | 2573.3844 | 2572.3771 | 2572.3649 | 5   | 1 R.ELATYADHIQIGLAGNLKDYVLR.T                  |
| 757 - 766   | 1072.5890 | 1071.5817 | 1071.5812 | 1   | 0 K.TPIGLSIDEK.C                               |
| 769 - 794   | 2853.4928 | 2852.4856 | 2852.4643 | 7   | 0 R.INHLASSMIALSQGIPFFHAGDEILR.S Oxidation (M) |
| 812 - 828   | 1978.9619 | 1977.9546 | 1977.9585 | -2  | 0 K.LDFTYETNNWVGVLPPR.D                        |
| 829 - 841   | 1678.8770 | 1677.8697 | 1677.8587 | 7   | 1 R.DKNEENWHLIKR.L                             |
| 831 - 841   | 1435.7463 | 1434.7390 | 1434.7368 | 2   | 0 K.NEENWHLIKR.L                               |
| 842 - 851   | 1200.6719 | 1199.6647 | 1199.6662 | -1  | 0 R.LENPSFRPLK.N                               |
| 869 - 875   | 869.4722  | 868.4649  | 868.4443  | 24  | 0 R.YSSPLFR.L                                  |
| 876 - 885   | 1119.5758 | 1118.5685 | 1118.5567 | 10  | 0 R.LSTASDIEQR.V                               |
| 978 - 987   | 1174.6750 | 1173.6678 | 1173.6618 | 5   | 1 R.RTTAVFVQPR.C                               |
| 979 - 987   | 1018.5780 | 1017.5707 | 1017.5607 | 10  | 0 R.TTAVFVQPR.C                                |



## Spot 1236

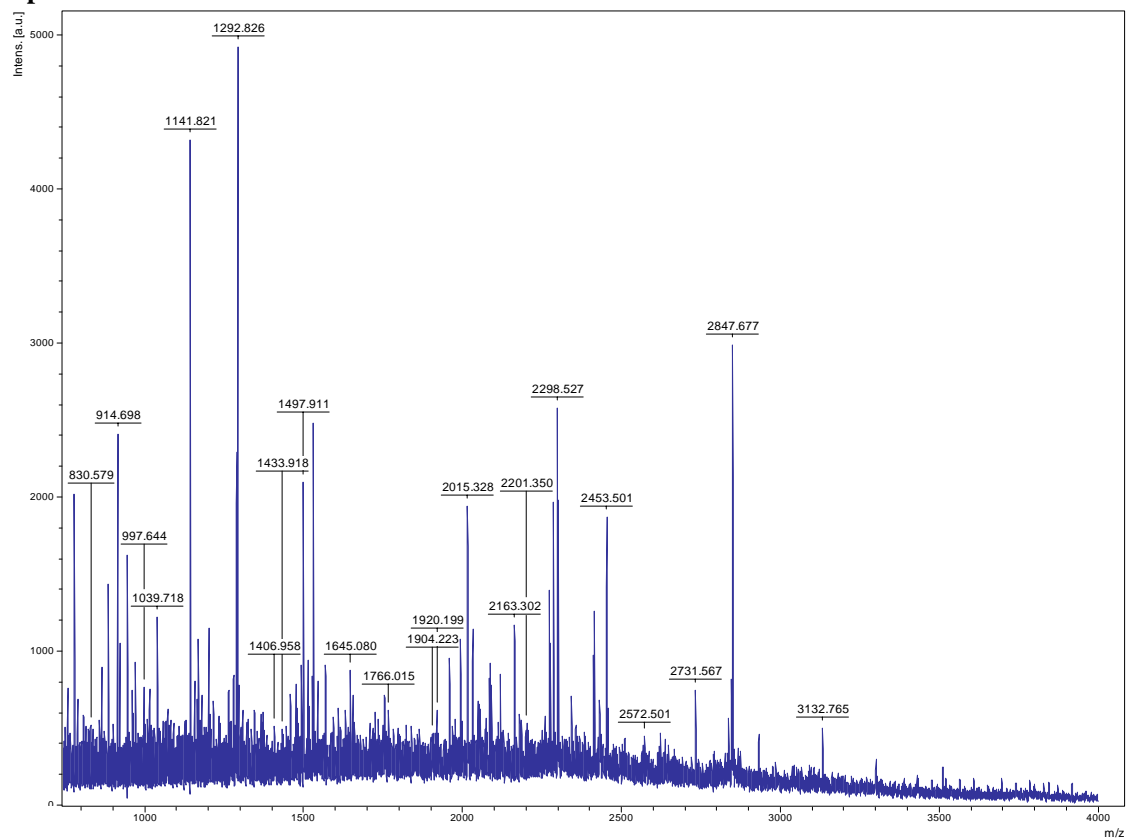

Match to: gi|50941891 Score: 97 Expect: 1.3e-05

### Matched peptides:

| Start - End | Observed  | Mr (expt) | Mr (calc) | Delta   | Miss Sequence                                   |
|-------------|-----------|-----------|-----------|---------|-------------------------------------------------|
| 9 - 24      | 1644.9900 | 1643.9827 | 1643.8882 | 0.0945  | 0 K.NILTTLPKPGGGEYGF.F                          |
| 25 - 35     | 1292.7432 | 1291.7359 | 1291.6561 | 0.0799  | 0 K.FYSLPALNDPR.I                               |
| 45 - 52     | 914.5031  | 913.4958  | 913.5596  | -0.0638 | 0 R.ILLESAIR.N                                  |
| 67 - 76     | 1202.6741 | 1201.6668 | 1201.5979 | 0.0689  | 0 K.IIDWENTSPK.L                                |
| 77 - 86     | 1141.7130 | 1140.7057 | 1140.6655 | 0.0402  | 0 K.LAEIPFKPAR.V                                |
| 87 - 105    | 2015.1483 | 2014.1410 | 2014.0921 | 0.0490  | 0 R.VLLQDFTGVPVAVVDLAAMR.D                      |
| 87 - 105    | 2031.1256 | 2030.1183 | 2030.0870 | 0.0313  | 0 R.VLLQDFTGVPVAVVDLAAMR.D Oxidation (M)        |
| 118 - 138   | 2298.2832 | 2297.2759 | 2297.2743 | 0.0017  | 0 K.INPLVPVDLVIDHSVQVDVAR.S                     |
| 358 - 378   | 2412.1174 | 2411.1101 | 2411.1566 | -0.0464 | 0 R.VYSSYLELDLNEVEPCISGPK.R Carbamidomethyl (C) |
| 405 - 415   | 1288.7118 | 1287.7045 | 1287.6459 | 0.0587  | 1 K.GFAVPKEQDK.V Acetyl (N-term)                |
| 460 - 472   | 1513.8593 | 1512.8520 | 1512.8010 | 0.0511  | 0 K.ACELGLEVKPWVK.T Acetyl (N-term)             |
| 485 - 497   | 1568.9251 | 1567.9178 | 1567.8246 | 0.0933  | 0 K.YLLQSGLQEYLNK.Q                             |
| 709 - 716   | 945.3566  | 944.3493  | 944.3988  | -0.0494 | 0 K.DFNSYGS.R                                   |
| 755 - 763   | 1039.5814 | 1038.5741 | 1038.5749 | -0.0008 | 0 K.LYVFDAAALK.Y                                |
| 764 - 785   | 2284.0657 | 2283.0584 | 2283.0767 | -0.0182 | 1 K.YKSEGHDTIVLAGAEYSGSSR.D                     |
| 766 - 785   | 1993.0156 | 1992.0083 | 1991.9184 | 0.0899  | 0 K.SEGHDTIVLAGAEYSGSSR.D                       |
| 866 - 872   | 884.3386  | 883.3313  | 883.4222  | -0.0909 | 0 K.SFTCTLR.F Carbamidomethyl (C)               |
| 873 - 893   | 2453.1524 | 2452.1451 | 2452.2426 | -0.0975 | 0 R.FDTEVELAYFNHGGILPYVIR.N                     |

## Spot 1242

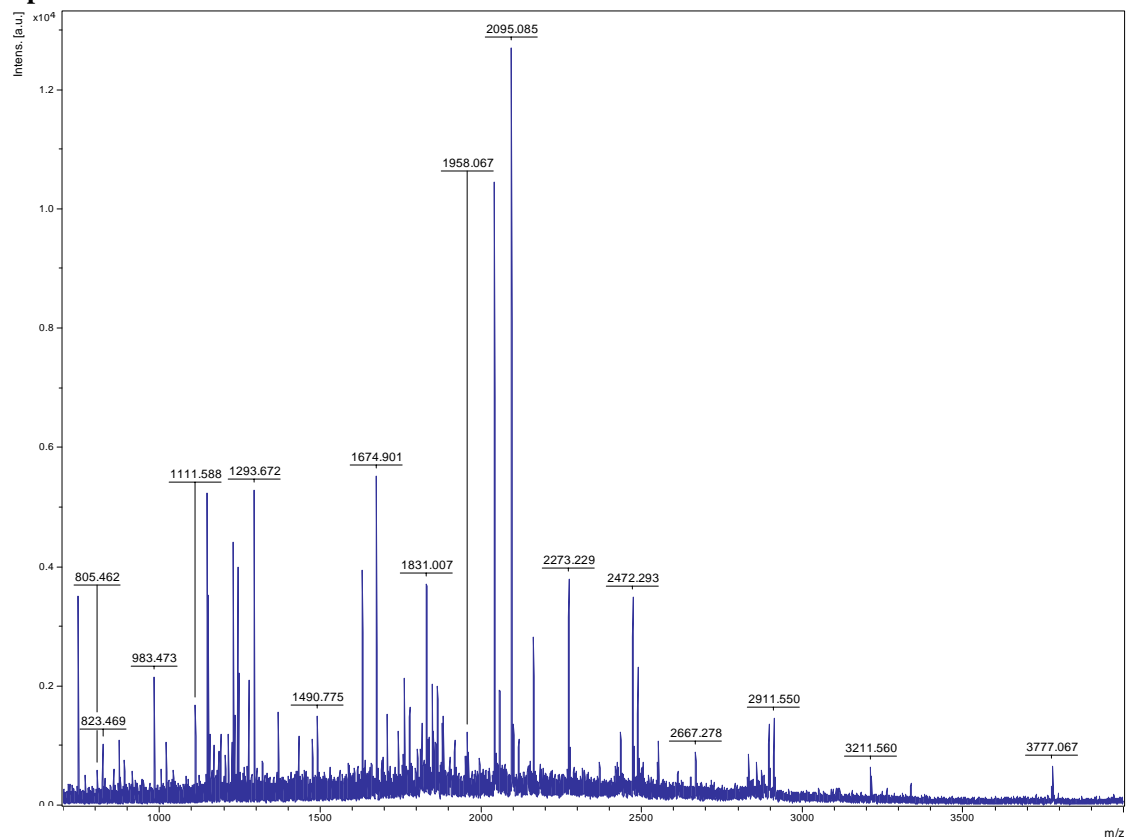

Match to: gi|51090952 Score: 167 Expect: 1.3e-12

### Matched peptides:

| Start - End | Observed  | Mr (expt) | Mr (calc) | Delta   | Miss Sequence                                    |
|-------------|-----------|-----------|-----------|---------|--------------------------------------------------|
| 51 - 72     | 2472.2026 | 2471.1953 | 2471.2015 | -0.0062 | 0 R.HSDGLPHLNQAEAEATWMGLLPR.R                    |
| 51 - 72     | 2488.1874 | 2487.1801 | 2487.1964 | -0.0163 | 0 R.HSDGLPHLNQAEAEATWMGLLPR.R Oxidation (M)      |
| 74 - 87     | 1674.8680 | 1673.8607 | 1673.8525 | 0.0082  | 1 R.AGPRDELDWLALYR.S                             |
| 78 - 87     | 1293.6550 | 1292.6477 | 1292.6401 | 0.0076  | 0 R.DELDWLALYR.S                                 |
| 92 - 113    | 2095.0155 | 2094.0082 | 2094.0129 | -0.0047 | 0 R.GGGDVGGEPAFLSPASLHDVR.V                      |
| 151 - 169   | 2042.0095 | 2041.0022 | 2040.9904 | 0.0118  | 0 K.LPTVGEFYGGEWAPDQQLR.G                        |
| 170 - 193   | 2667.1900 | 2666.1827 | 2666.2196 | -0.0369 | 0 R.GHFTGHYLSAAAHMWASTHNDALR.E Oxidation (M)     |
| 199 - 208   | 1224.6263 | 1223.6190 | 1223.6220 | -0.0030 | 0 K.VVDILYSCQK.K Carbamidomethyl (C)             |
| 242 - 257   | 1761.9343 | 1760.9270 | 1760.9131 | 0.0140  | 0 K.IMQGLLDQYTLAGNPK.G                           |
| 242 - 257   | 1777.9079 | 1776.9006 | 1776.9080 | -0.0073 | 0 K.IMQGLLDQYTLAGNPK.G Oxidation (M)             |
| 258 - 272   | 1816.8941 | 1815.8868 | 1815.8865 | 0.0003  | 0 K.GLEIVVWMTDYFSTR.V                            |
| 276 - 284   | 1149.6308 | 1148.6235 | 1148.6189 | 0.0046  | 0 K.LIQEYSIQRH                                   |
| 353 - 363   | 1369.7260 | 1368.7187 | 1368.7037 | 0.0150  | 1 K.RYEVVGDQLYK.E                                |
| 354 - 363   | 1213.6131 | 1212.6058 | 1212.6026 | 0.0032  | 0 R.YEVVGDQLYK.E                                 |
| 402 - 416   | 1742.8422 | 1741.8349 | 1741.8192 | 0.0157  | 0 K.ISSNEETCATYNLLK.V Carbamidomethyl (C)        |
| 430 - 436   | 983.4090  | 982.4017  | 982.4144  | -0.0127 | 0 K.YTDHYER.L                                    |
| 437 - 447   | 1228.6945 | 1227.6872 | 1227.6757 | 0.0115  | 0 R.LLINGIMGNQR.G                                |
| 448 - 464   | 1848.9430 | 1847.9357 | 1847.9425 | -0.0068 | 1 R.GKEPGVMYFLPMGPGR.S                           |
| 448 - 464   | 1864.9586 | 1863.9513 | 1863.9375 | 0.0139  | 1 R.GKEPGVMYFLPMGPGR.S Oxidation (M)             |
| 448 - 464   | 1880.9624 | 1879.9551 | 1879.9324 | 0.0228  | 1 R.GKEPGVMYFLPMGPGR.S 2 Oxidation (M)           |
| 563 - 573   | 1168.6155 | 1167.6082 | 1167.6108 | -0.0026 | 0 K.GDARPNVNVRI                                  |
| 606 - 615   | 1147.5968 | 1146.5895 | 1146.5921 | -0.0025 | 0 K.LWGDDTSLK.F                                  |
| 616 - 621   | 746.3849  | 745.3776  | 745.4486  | -0.0710 | 0 K.FPITLR.T                                     |
| 743 - 759   | 1631.7917 | 1630.7844 | 1630.7699 | 0.0145  | 0 R.AYHSPSGASIDAATGR.L                           |
| 764 - 791   | 2895.4196 | 2894.4123 | 2894.4708 | -0.0585 | 0 R.DVALEPFDRPGMAVTDALSVGRPGPATR.F               |
| 764 - 791   | 2911.4043 | 2910.3970 | 2910.4657 | -0.0687 | 0 R.DVALEPFDRPGMAVTDALSVGRPGPATR.F Oxidation (M) |

# Spot 1248

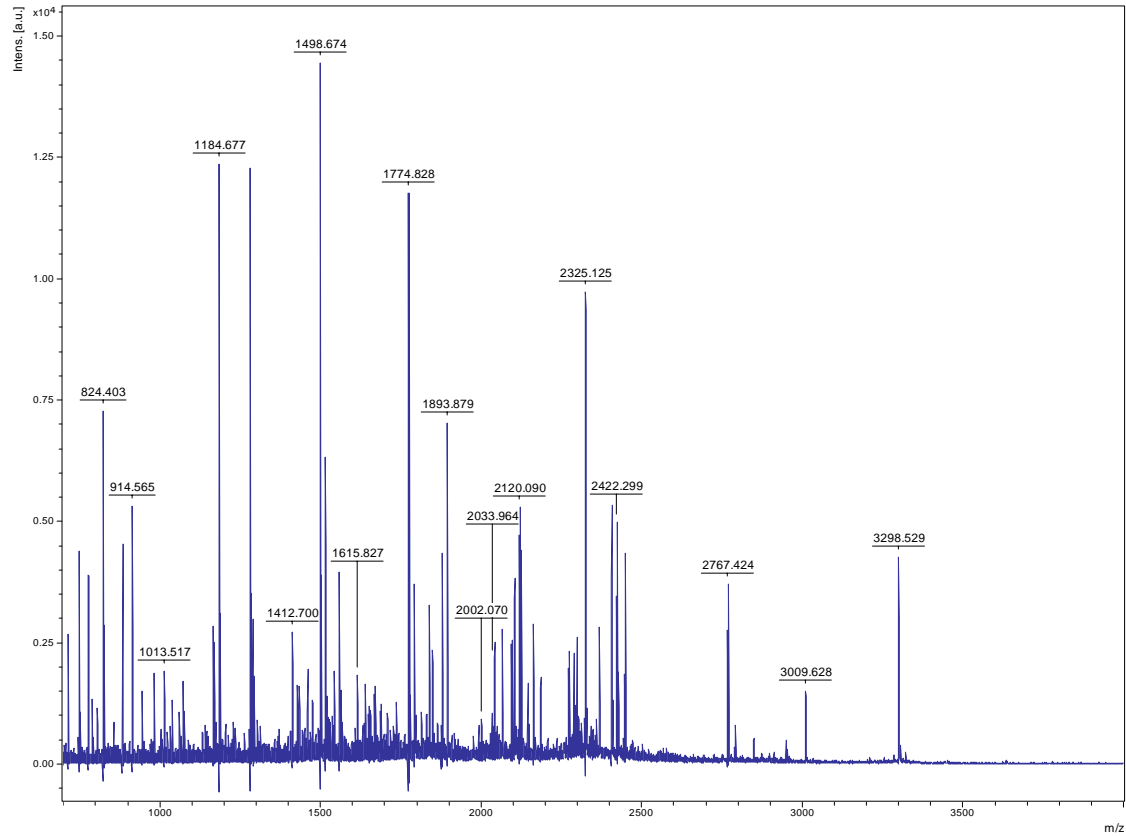

Match to: gj|115468938 Score: 304 Expect: 1.3e-26

## Matched peptides:

| Start - End | Observed  | Mr (expt) | Mr (calc) | ppm | Miss Sequence                             |
|-------------|-----------|-----------|-----------|-----|-------------------------------------------|
| 92 - 112    | 2124.0670 | 2123.0597 | 2123.0535 | 3   | 0 K.NSYDEILTGLAKPGGAEFGK.Y                |
| 113 - 123   | 1281.6463 | 1280.6390 | 1280.6401 | -1  | 0 K.YYSLPALS DPR.I                        |
| 127 - 132   | 748.4230  | 747.4157  | 747.4279  | -16 | 0 R.LPYSIR.I                              |
| 133 - 140   | 914.5653  | 913.5581  | 913.5596  | -2  | 0 R.ILLESAIR.N                            |
| 155 - 164   | 1172.5918 | 1171.5845 | 1171.5873 | -2  | 0 K.IILDWENSAPK.Q                         |
| 165 - 174   | 1167.6468 | 1166.6396 | 1166.6448 | -4  | 0 K.QVEIPFKPAR.V Gln->pyro-Glu (N-term Q) |
| 165 - 174   | 1184.6771 | 1183.6698 | 1183.6713 | -1  | 0 K.QVEIPFKPAR.V                          |
| 175 - 193   | 2104.0903 | 2103.0831 | 2103.0857 | -1  | 0 R.VLLQDFTGVPVAVDLACMR.D                 |
| 175 - 193   | 2120.0902 | 2119.0830 | 2119.0806 | 1   | 0 R.VLLQDFTGVPVAVDLACMR.D Oxidation (M)   |
| 199 - 226   | 3009.6281 | 3008.6208 | 3008.6295 | -3  | 1 K.LGSDPNKINLPLVPVDLVIDHSVQVDVAR.S       |
| 206 - 226   | 2298.2776 | 2297.2703 | 2297.2744 | -2  | 0 K.INLPLVPVDLVIDHSVQVDVAR.S              |
| 227 - 241   | 1774.8278 | 1773.8205 | 1773.8104 | 6   | 0 R.SENAVQANMELEFHR.N                     |
| 227 - 241   | 1790.8240 | 1789.8167 | 1789.8053 | 6   | 0 R.SENAVQANMELEFHR.N Oxidation (M)       |
| 251 - 257   | 824.4033  | 823.3960  | 823.3977  | -2  | 0 K.WGSTAFR.N                             |
| 258 - 279   | 2406.3029 | 2405.2956 | 2405.2889 | 3   | 0 R.NMLVPPGSGIVHQVNLEYLAR.V               |
| 258 - 279   | 2422.2993 | 2421.2920 | 2421.2838 | 3   | 0 R.NMLVPPGSGIVHQVNLEYLAR.V Oxidation (M) |
| 369 - 385   | 1877.8872 | 1876.8799 | 1876.8665 | 7   | 0 K.FVEFYGGMSLESLADR.A                    |
| 369 - 385   | 1893.8793 | 1892.8720 | 1892.8615 | 6   | 0 K.FVEFYGGMSLESLADR.A Oxidation (M)      |
| 408 - 413   | 752.4171  | 751.4099  | 751.4116  | -2  | 0 K.TLDYLK.L                              |
| 418 - 430   | 1515.7164 | 1514.7091 | 1514.6923 | 11  | 0 R.SDDTVAMIESYLRA Oxidation (M)          |
| 434 - 445   | 1498.6738 | 1497.6666 | 1497.6558 | 7   | 0 K.MFVDYNQPEAER.V                        |
| 434 - 445   | 1514.6787 | 1513.6714 | 1513.6507 | 14  | 0 K.MFVDYNQPEAER.V Oxidation (M)          |
| 446 - 466   | 2426.1937 | 2425.1864 | 2425.1723 | 6   | 0 R.VYSSYLELNEEVEPCLSGPK.R                |
| 504 - 515   | 1290.6445 | 1289.6372 | 1289.6404 | -3  | 0 K.VAEFSFHGTPAK.L                        |
| 548 - 560   | 1542.8118 | 1541.8045 | 1541.8276 | -15 | 0 K.ACELGLEVKPVIK.T                       |
| 561 - 571   | 1015.5814 | 1014.5741 | 1014.5710 | 3   | 0 K.TSLAPGSGVVK.K                         |
| 672 - 679   | 1013.5172 | 1012.5099 | 1012.4978 | 12  | 1 K.DGKEVYFR.D                            |
| 675 - 679   | 713.3517  | 712.3445  | 712.3544  | -14 | 0 K.EVYFR.D                               |
| 680 - 693   | 1615.8271 | 1614.8198 | 1614.8141 | 4   | 0 R.DIWPSTEEIAEVVK.S                      |
| 743 - 755   | 1412.7000 | 1411.6927 | 1411.6952 | -2  | 0 K.DMTMSPGPRPVK.D                        |
| 743 - 755   | 1428.6819 | 1427.6747 | 1427.6901 | -11 | 0 K.DMTMSPGPRPVK.D Oxidation (M)          |
| 756 - 786   | 3298.5287 | 3297.5214 | 3297.5361 | -4  | 0 K.DAYCLLNFGDSITTDHISPAGSIHPDSPAAR.Y     |
| 796 - 804   | 1073.5150 | 1072.5078 | 1072.4938 | 13  | 1 R.KDFNSYGSRR                            |
| 797 - 804   | 945.4125  | 944.4052  | 944.3988  | 7   | 0 K.DFNSYGSRR                             |
| 805 - 813   | 1061.5267 | 1060.5194 | 1060.5083 | 10  | 1 R.RGNDEIMAR.G                           |
| 814 - 820   | 778.4158  | 777.4085  | 777.4133  | -6  | 0 R.GTFANIR.L                             |
| 834 - 842   | 981.5403  | 980.5330  | 980.5291  | 4   | 0 K.TIHPSGEK.L                            |
| 852 - 873   | 2325.1253 | 2324.1180 | 2324.1033 | 6   | 1 K.YKNEGHDITILAGAEYSGSSR.D               |
| 854 - 873   | 2033.9636 | 2032.9563 | 2032.9450 | 6   | 0 K.NEGHDITILAGAEYSGSSR.D                 |
| 913 - 927   | 1557.7328 | 1556.7255 | 1556.7067 | 12  | 0 K.SGEDADTLGLTGHFR.F                     |
| 928 - 953   | 2767.4237 | 2766.4164 | 2766.4189 | -1  | 0 R.FTVHLPANVSEIKPGQDVTVTTDNGK.S          |
| 954 - 960   | 884.4314  | 883.4241  | 883.4222  | 2   | 0 K.SFTCTLR.F                             |
| 961 - 981   | 2447.2194 | 2446.2121 | 2446.2056 | 3   | 0 R.FDTEVELAYYDNGGILPYVIR.K               |

## Spot 1252

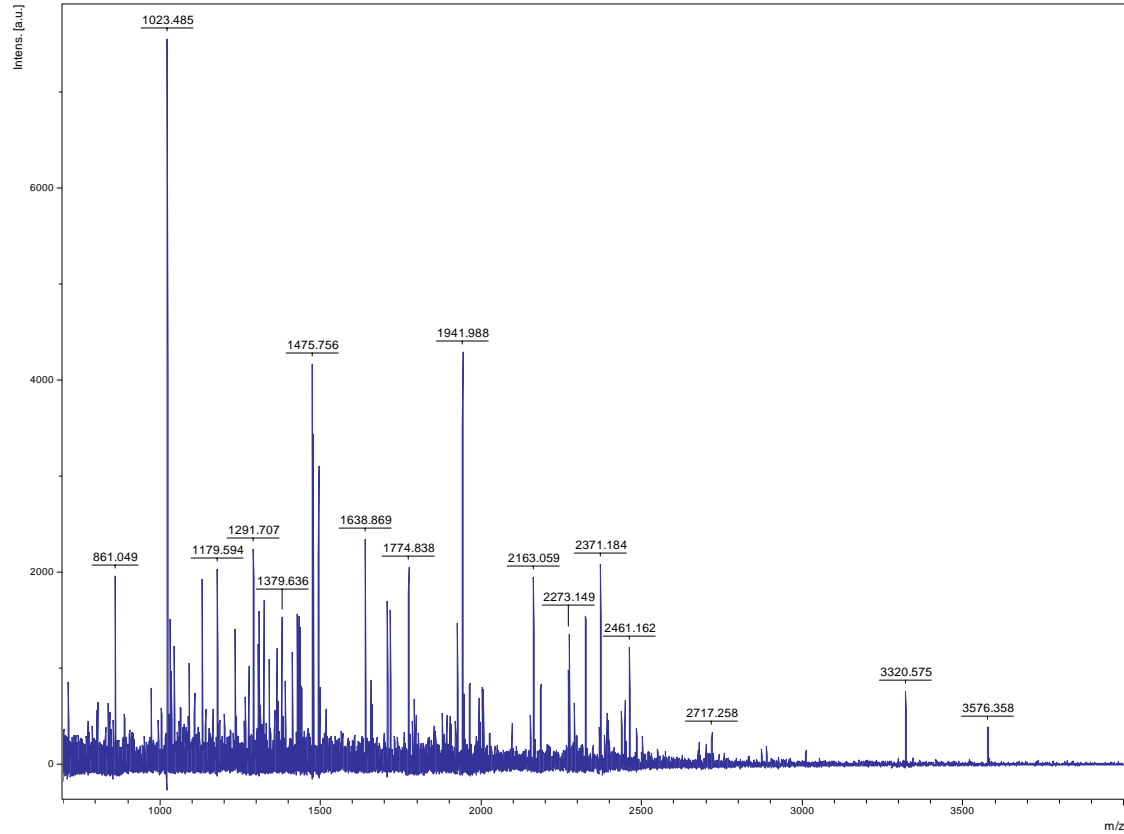

Match to: gi|38344900; Score: 111

### Matched peptides:

| Start - End | Observed | Mr (expt) | Mr (calc) | Delta | Miss Sequence                |
|-------------|----------|-----------|-----------|-------|------------------------------|
| 133 - 143   | 1131.63  | 1130.63   | 1130.59   | 0.04  | 0 AIGEVVSTEAR                |
| 171 - 184   | 1441.72  | 1440.72   | 1440.71   | 0.01  | 0 GQETPGEDPLLASK             |
| 185 - 204   | 1942.00  | 1940.99   | 1940.95   | 0.05  | 0 YAVGYVTGLQDAGGGSDALK       |
| 211 - 221   | 1411.65  | 1410.65   | 1410.62   | 0.03  | 0 HYTAYVDNWK                 |
| 226 - 246   | 2461.20  | 2460.20   | 2460.15   | 0.05  | 0 YTFDAVVSQQDLDDTFQPPFK      |
| 320 - 342   | 2371.21  | 2370.21   | 2370.17   | 0.03  | 0 SGLDLNCGNFLAQHTVAAVQAGK    |
| 351 - 361   | 1291.74  | 1290.74   | 1290.71   | 0.02  | 0 AITNNFVLMR                 |
| 362 - 370   | 1023.53  | 1022.53   | 1022.48   | 0.05  | 0 LGFFDGDPR                  |
| 371 - 380   | 1043.66  | 1042.65   | 1042.62   | 0.04  | 1 KLFFGSLGPK                 |
| 381 - 392   | 1379.65  | 1378.65   | 1378.61   | 0.03  | 0 DVCTSSNQELAR               |
| 579 - 591   | 1494.78  | 1493.78   | 1493.76   | 0.02  | 0 LPVTWYPASFADK              |
| 599 - 610   | 1339.65  | 1338.65   | 1338.60   | 0.05  | 0 MRPDSSTGYPGR Oxidation (M) |
| 614 - 631   | 2004.94  | 2003.94   | 2003.92   | 0.02  | 0 FYTGDIVYAFGDGLSYTK         |

# Spot 1257

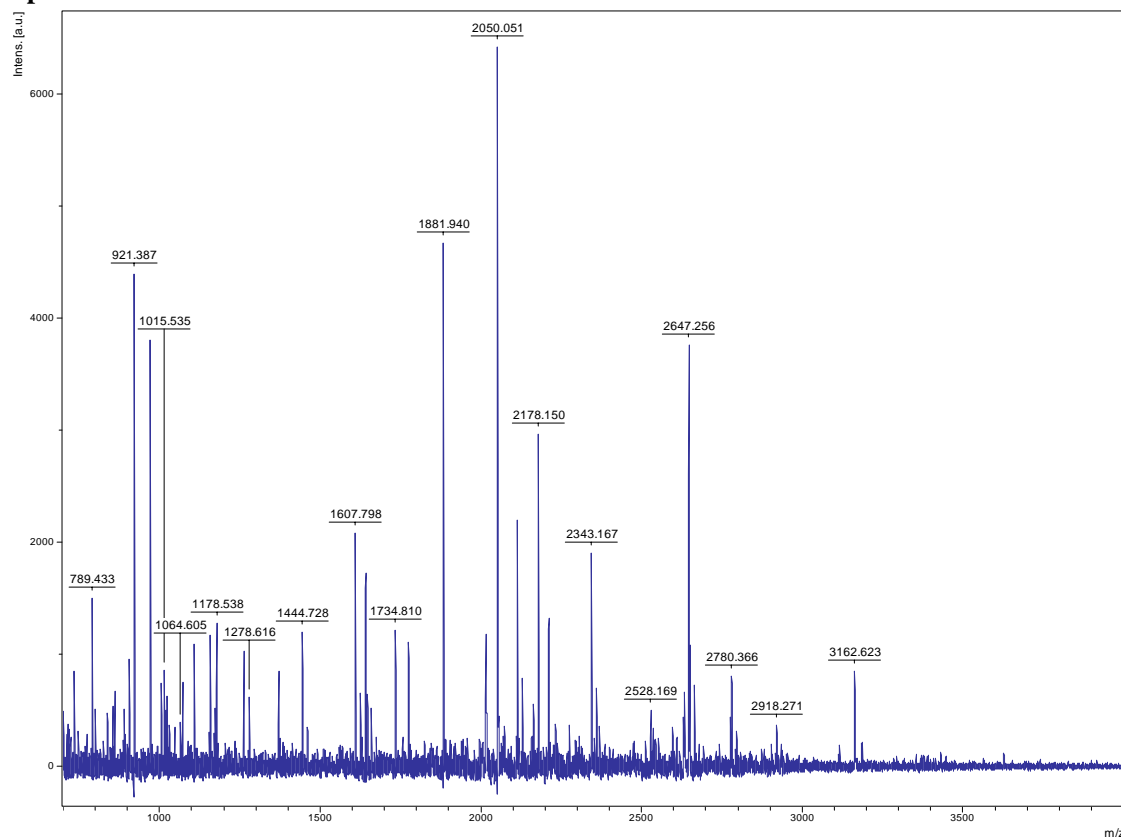

Match to: gi|50878307 Score: 141 Expect: 5.3e-10

## Matched peptides:

| Start - End | Observed  | Mr (expt) | Mr (calc) | Delta   | Miss Sequence                                                     |
|-------------|-----------|-----------|-----------|---------|-------------------------------------------------------------------|
| 40 - 48     | 1006.5658 | 1005.5585 | 1005.5719 | -0.0134 | 0 R.HGKPEVAIR.S                                                   |
| 77 - 82     | 734.3956  | 733.3883  | 733.3911  | -0.0028 | 0 R.VFHFGK.G                                                      |
| 203 - 209   | 921.4596  | 920.4523  | 920.4028  | 0.0495  | 0 R.FAYDSYR.R                                                     |
| 211 - 230   | 2352.1075 | 2351.1002 | 2351.1329 | -0.0327 | 0 R.FLDMFGNVVMDIPHALFEEK.L                                        |
| 211 - 230   | 2368.1440 | 2367.1367 | 2367.1278 | 0.0089  | 0 R.FLDMFGNVVMDIPHALFEEK.L Oxidation (M)                          |
| 299 - 307   | 1015.6322 | 1014.6249 | 1014.6073 | 0.0176  | 1 R.SINKITGLK.G Acetyl (N-term)                                   |
| 341 - 360   | 2178.2035 | 2177.1962 | 2177.1479 | 0.0483  | 1 K.KLYGEFLVNAQGEDVVAGIR.T                                        |
| 342 - 360   | 2050.1120 | 2049.1047 | 2049.0530 | 0.0517  | 0 K.LYGEFLVNAQGEDVVAGIR.T                                         |
| 361 - 384   | 2919.1574 | 2918.1501 | 2918.2408 | -0.0907 | 1 R.TPEDLDAMRDHMPPEYEELVENCK.I Acetyl (N-term); Oxidation (M)     |
| 385 - 404   | 2512.2067 | 2511.1994 | 2511.1773 | 0.0221  | 1 K.ILESHYKEMMDIEFTVQENR.L                                        |
| 385 - 404   | 2528.1213 | 2527.1140 | 2527.1722 | -0.0582 | 1 K.ILESHYKEMMDIEFTVQENR.L Oxidation (M)                          |
| 385 - 404   | 2544.1795 | 2543.1722 | 2543.1672 | 0.0051  | 1 K.ILESHYKEMMDIEFTVQENR.L 2 Oxidation (M)                        |
| 392 - 404   | 1641.8431 | 1640.8358 | 1640.7174 | 0.1184  | 0 K.EMMDIEFTVQENR.L                                               |
| 423 - 435   | 1444.8628 | 1443.8555 | 1443.7391 | 0.1164  | 0 K.IAVDMVNEGLVER.R                                               |
| 441 - 462   | 2536.2293 | 2535.2220 | 2535.2216 | 0.0005  | 0 K.MVEPGHLDQLLHPQFENPSGYK.D                                      |
| 441 - 464   | 2779.2836 | 2778.2763 | 2778.3435 | -0.0672 | 1 K.MVEPGHLDQLLHPQFENPSGYKDK.V                                    |
| 441 - 464   | 2795.1870 | 2794.1797 | 2794.3384 | -0.1587 | 1 K.MVEPGHLDQLLHPQFENPSGYKDK.V Oxidation (M)                      |
| 465 - 496   | 3162.4904 | 3161.4831 | 3161.6144 | -0.1313 | 0 K.VIATGLPASPGAAVGQIVFTAEDAEAWHAQGK.D                            |
| 503 - 523   | 2112.0915 | 2111.0842 | 2111.0316 | 0.0526  | 0 R.TETSPEDVGGMHAAVGILTAR.G                                       |
| 503 - 523   | 2128.0521 | 2127.0448 | 2127.0266 | 0.0183  | 0 R.TETSPEDVGGMHAAVGILTAR.G Oxidation (M)                         |
| 563 - 583   | 2210.1825 | 2209.1752 | 2209.1378 | 0.0374  | 0 K.ALHEGEWLSLNGSTGEVHGK.Q                                        |
| 584 - 606   | 2647.1994 | 2646.1921 | 2646.2458 | -0.0536 | 0 K.QPLCPPALSGDLETFMSWVDEV.R.K Carbamidomethyl (C)                |
| 584 - 606   | 2663.2260 | 2662.2187 | 2662.2407 | -0.0220 | 0 K.QPLCPPALSGDLETFMSWVDEV.R.K Carbamidomethyl (C); Oxidation (M) |
| 625 - 635   | 1174.6815 | 1173.6742 | 1173.5560 | 0.1182  | 0 R.QNGAEGIGLCR.T Carbamidomethyl (C)                             |
| 669 - 674   | 789.4631  | 788.4558  | 788.4545  | 0.0014  | 0 R.LLPYQR.S                                                      |
| 675 - 682   | 970.5376  | 969.5303  | 969.4556  | 0.0748  | 0 R.SDFEGIFR.A                                                    |
| 683 - 692   | 1072.6790 | 1071.6717 | 1071.5746 | 0.0971  | 0 R.AMDGLPVTIRL                                                   |
| 693 - 712   | 2343.1799 | 2342.1726 | 2342.1728 | -0.0002 | 0 R.LLDPLHEFLPEGHVEDMVR.E                                         |
| 693 - 712   | 2359.1600 | 2358.1527 | 2358.1678 | -0.0150 | 0 R.LLDPLHEFLPEGHVEDMVR.E Oxidation (M)                           |
| 713 - 728   | 1734.9171 | 1733.9098 | 1733.7890 | 0.1208  | 0 R.ELCSETGAAQDDVLR.V Carbamidomethyl (C)                         |
| 732 - 742   | 1262.7604 | 1261.7531 | 1261.6488 | 0.1043  | 0 K.LSEVNPMLGFR.G                                                 |
| 746 - 759   | 1607.9234 | 1606.9161 | 1606.8024 | 0.1137  | 0 R.LGISYPELTEMQAR.A                                              |

## Spot 1262

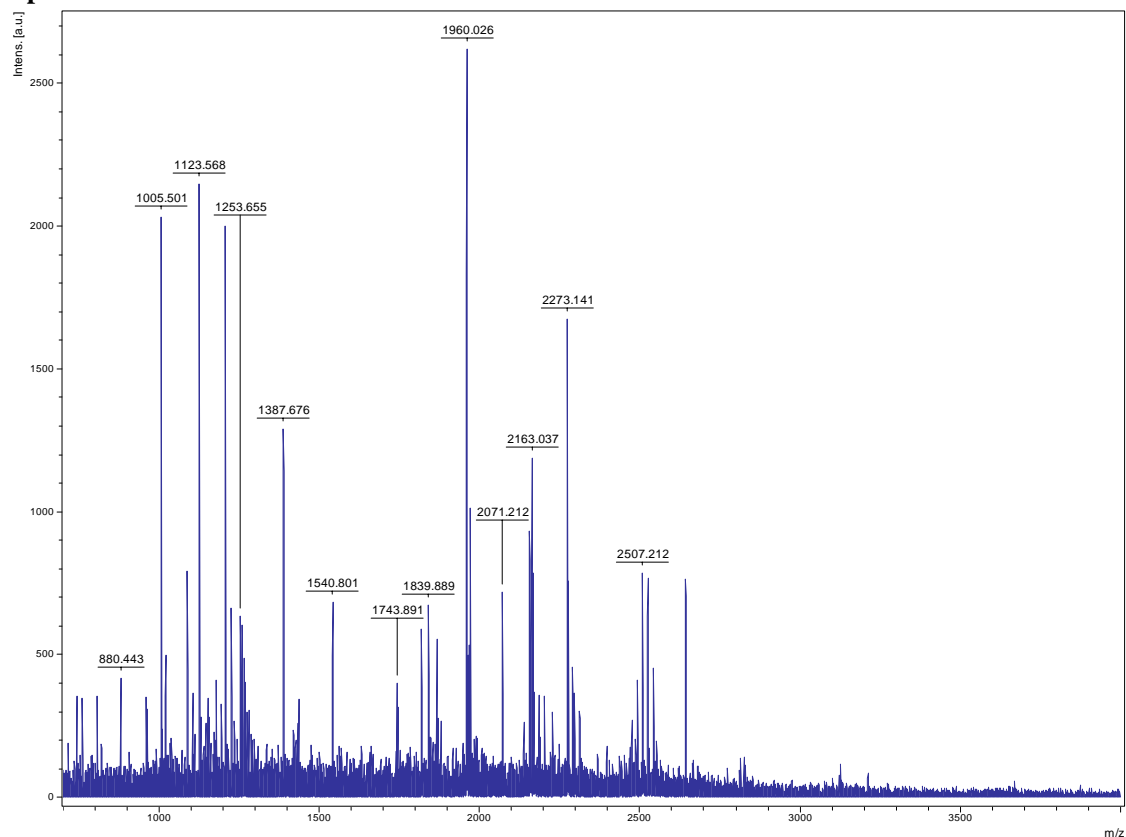

Match to: gi|267056 Score: 263 Expect: 2.3e-22

### Matched peptides:

| Start - End | Observed  | Mr (expt) | Mr (calc) | Delta   | Miss Sequence                               |
|-------------|-----------|-----------|-----------|---------|---------------------------------------------|
| 15 - 32     | 1960.0262 | 1959.0190 | 1959.0213 | -0.0024 | 0 R.LGATFSSHPNELIALFSR.Y                    |
| 44 - 60     | 1970.0137 | 1969.0064 | 1969.0156 | -0.0092 | 1 R.HQLLAEFDALIEADKEK.Y                     |
| 61 - 69     | 1123.5679 | 1122.5606 | 1122.5709 | -0.0103 | 0 K.YAPFEDILR.A                             |
| 149 - 159   | 1204.5968 | 1203.5895 | 1203.6360 | -0.0464 | 0 K.SIGNGVQFLNR.H                           |
| 165 - 180   | 1968.0729 | 1967.0656 | 1967.0767 | -0.0111 | 1 K.LFQDKESLYPLLNLK.A                       |
| 207 - 227   | 2525.2046 | 2524.1973 | 2524.1692 | 0.0281  | 1 R.KAEEYLMGIPQDTPYSEFNHR.F                 |
| 207 - 227   | 2541.1785 | 2540.1712 | 2540.1641 | 0.0071  | 1 R.KAEEYLMGIPQDTPYSEFNHR.F Oxidation (M)   |
| 228 - 235   | 963.4988  | 962.4915  | 962.5072  | -0.0157 | 0 R.FQELGLEK.G                              |
| 309 - 317   | 1088.5616 | 1087.5544 | 1087.5695 | -0.0152 | 0 R.ALENEMLLR.I                             |
| 309 - 317   | 1104.5411 | 1103.5339 | 1103.5645 | -0.0306 | 0 R.ALENEMLLR.I Oxidation (M)               |
| 335 - 347   | 1387.6761 | 1386.6689 | 1386.6925 | -0.0236 | 0 R.LLPDVGTTTCGQR.V Carbamidomethyl (C)     |
| 335 - 350   | 1743.8906 | 1742.8833 | 1742.8985 | -0.0151 | 1 R.LLPDVGTTTCGQRVEK.V Carbamidomethyl (C)  |
| 351 - 361   | 1253.6548 | 1252.6475 | 1252.6775 | -0.0300 | 0 K.VIGTEHTDILR.V                           |
| 424 - 437   | 1540.8009 | 1539.7936 | 1539.8079 | -0.0143 | 0 K.LGVTCQCTIAHALEK.T Carbamidomethyl (C)   |
| 486 - 504   | 2167.0789 | 2166.0716 | 2166.0745 | -0.0029 | 0 K.DTVGQYESHIAFTLPGLYR.V                   |
| 505 - 515   | 1225.6279 | 1224.6207 | 1224.6502 | -0.0296 | 0 R.VVHGIDVFDPK.F                           |
| 516 - 537   | 2507.2119 | 2506.2046 | 2506.1838 | 0.0209  | 1 K.FNIVSPGADMSVYFPYTEADKR.L                |
| 516 - 537   | 2523.1831 | 2522.1758 | 2522.1787 | -0.0029 | 1 K.FNIVSPGADMSVYFPYTEADKR.L Oxidation (M)  |
| 538 - 559   | 2642.2847 | 2641.2774 | 2641.2547 | 0.0227  | 0 R.LTAFHPEIEELLYSEVENDEHK.F                |
| 564 - 575   | 1435.7449 | 1434.7376 | 1434.7653 | -0.0277 | 1 K.DKNKPIFMSMAR.L Oxidation (M)            |
| 566 - 575   | 1176.6176 | 1175.6103 | 1175.6485 | -0.0382 | 0 K.NKNPIFMSMAR.L                           |
| 597 - 613   | 1839.8892 | 1838.8819 | 1838.8944 | -0.0126 | 0 R.DLANLVIVCGDHGNSK.D Carbamidomethyl (C)  |
| 614 - 622   | 1151.5184 | 1150.5112 | 1150.5254 | -0.0143 | 1 K.DREEQAEFK.K                             |
| 623 - 632   | 1258.6254 | 1257.6181 | 1257.6427 | -0.0246 | 1 K.KMYGLIDQYK.L                            |
| 639 - 646   | 1005.5012 | 1004.4939 | 1004.4862 | 0.0077  | 0 R.WISQMNR.V                               |
| 639 - 646   | 1021.4901 | 1020.4828 | 1020.4811 | 0.0018  | 0 R.WISQMNR.V Oxidation (M)                 |
| 715 - 725   | 1266.6328 | 1265.6255 | 1265.6655 | -0.0400 | 0 K.AADILVNFPEK.C                           |
| 726 - 743   | 2155.9683 | 2154.9610 | 2154.9752 | -0.0142 | 1 K.CKQDSTYWDNISQGLQR.I Carbamidomethyl (C) |
| 769 - 775   | 880.4427  | 879.4354  | 879.4450  | -0.0096 | 0 K.YVSNLER.R                               |

## Spot 1264

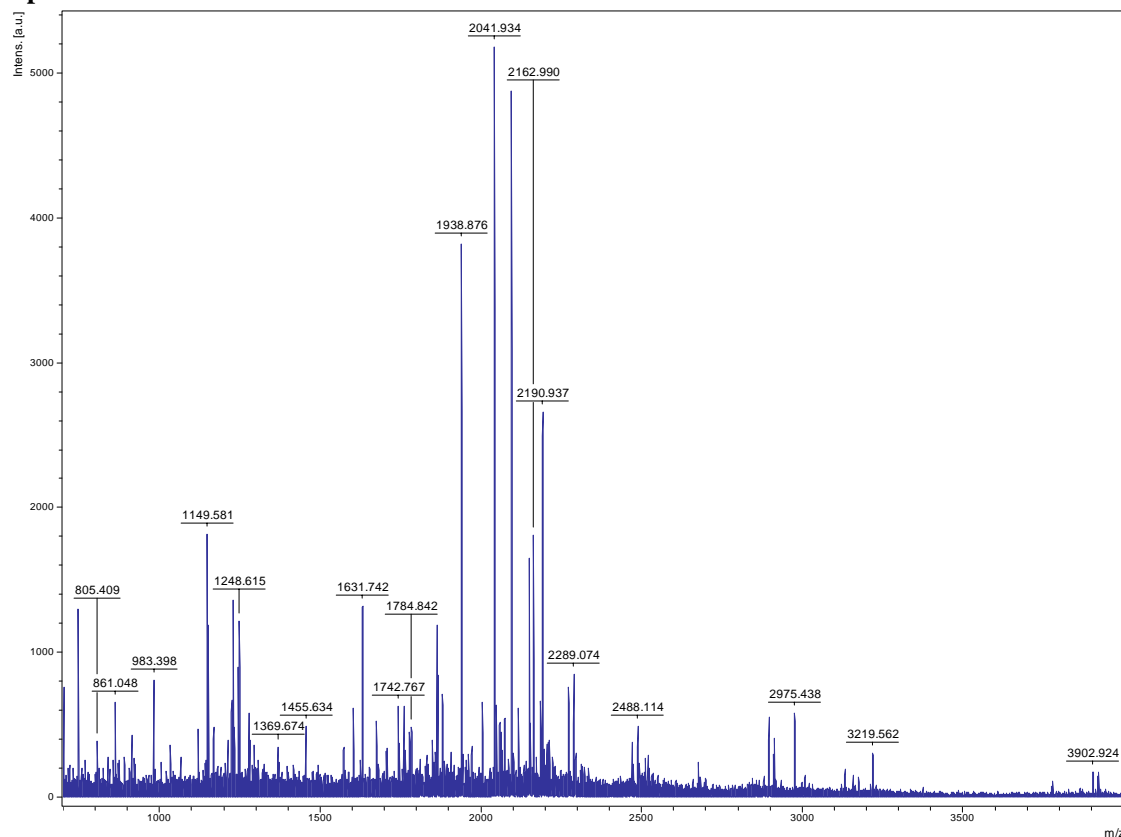

Match to: gi|51090952; Score: 178

### Matched peptides:

| Start - End | Observed | Mr (expt) | Mr (calc) | Delta | Miss Sequence                                |
|-------------|----------|-----------|-----------|-------|----------------------------------------------|
| 51 - 72     | 2472.12  | 2471.12   | 2471.20   | -0.08 | 0 HSDGLPHLNQAEETWVGMLLPR                     |
| 51 - 72     | 2488.11  | 2487.11   | 2487.20   | -0.09 | 0 HSDGLPHLNQAEETWVGMLLPR Oxidation (M)       |
| 74 - 87     | 1674.79  | 1673.79   | 1673.85   | -0.06 | 1 AGPRDELQWALYR                              |
| 78 - 87     | 1293.60  | 1292.60   | 1292.64   | -0.04 | 0 DELDWLALYR                                 |
| 92 - 113    | 2094.96  | 2093.96   | 2094.01   | -0.05 | 0 GGGDVGGEPAFLSPALHDVDR                      |
| 151 - 169   | 2041.93  | 2040.93   | 2040.99   | -0.06 | 0 LPTVGEPPYGGWEAPDQGLR                       |
| 199 - 208   | 1224.57  | 1223.57   | 1223.62   | -0.06 | 0 VVDILYSCQK                                 |
| 242 - 257   | 1761.85  | 1760.85   | 1760.91   | -0.07 | 0 IMQGLLDQYTLAGNPK                           |
| 242 - 257   | 1777.84  | 1776.84   | 1776.91   | -0.07 | 0 IMQGLLDQYTLAGNPK Oxidation (M)             |
| 275 - 284   | 1277.66  | 1276.66   | 1276.71   | -0.06 | 1 KLIQEYSIQR                                 |
| 276 - 284   | 1149.58  | 1148.58   | 1148.62   | -0.04 | 0 LIQEYSIQR                                  |
| 353 - 363   | 1369.67  | 1368.67   | 1368.70   | -0.03 | 1 RYEVVDQLYK                                 |
| 354 - 363   | 1213.59  | 1212.59   | 1212.60   | -0.02 | 0 YEVVDQLYK                                  |
| 402 - 416   | 1742.77  | 1741.76   | 1741.82   | -0.05 | 0 ISSNEETCATYNLLK                            |
| 430 - 436   | 983.40   | 982.40    | 982.41    | -0.02 | 0 YTDHYER                                    |
| 430 - 447   | 2192.92  | 2191.91   | 2192.08   | -0.17 | 1 YTDHYERLLINGIMGNQR                         |
| 437 - 447   | 1228.64  | 1227.63   | 1227.68   | -0.04 | 0 LLINGIMGNQR                                |
| 437 - 447   | 1244.62  | 1243.62   | 1243.67   | -0.05 | 0 LLINGIMGNQR Oxidation (M)                  |
| 448 - 464   | 1864.86  | 1863.86   | 1863.94   | -0.08 | 1 GKEPGVMYFLPMGPGR Oxidation (M)             |
| 448 - 464   | 1880.85  | 1879.84   | 1879.93   | -0.09 | 1 GKEPGVMYFLPMGPGR 2 Oxidation (M)           |
| 563 - 573   | 1168.56  | 1167.56   | 1167.61   | -0.05 | 0 GDARPANVNR                                 |
| 606 - 615   | 1147.55  | 1146.55   | 1146.59   | -0.04 | 0 LWGDDTLCLK                                 |
| 743 - 759   | 1631.74  | 1630.74   | 1630.77   | -0.03 | 0 AYHSPGASAIIDAAATGR                         |
| 764 - 791   | 2895.39  | 2894.39   | 2894.47   | -0.08 | 0 DVALEPFDRPGMAVTDALSVGRPGPATR               |
| 764 - 791   | 2911.39  | 2910.39   | 2910.47   | -0.08 | 0 DVALEPFDRPGMAVTDALSVGRPGPATR Oxidation (M) |

Match to: gi|1346109; Score: 123

### Matched peptides:

| Start - End | Observed | Mr (expt) | Mr (calc) | Delta | Miss Sequence                  |
|-------------|----------|-----------|-----------|-------|--------------------------------|
| 42 - 69     | 2975.44  | 2974.44   | 2974.48   | -0.05 | 0 SLLVWDLTNPVQNVGEGAGASEYGVVPR |
| 101 - 111   | 1248.61  | 1247.61   | 1247.65   | -0.04 | 0 LWDLSTGVVTR                  |
| 113 - 130   | 2004.95  | 2003.94   | 2004.01   | -0.06 | 1 FVGHDKDVLVAFVSDNR            |
| 143 - 151   | 1120.50  | 1119.50   | 1119.54   | -0.04 | 0 LWNTLGECK                    |
| 152 - 172   | 2190.94  | 2189.93   | 2189.99   | -0.06 | 0 YTIGGDLGGGEGHNGWVSCVR        |
| 173 - 189   | 1938.88  | 1937.87   | 1937.93   | -0.05 | 0 FSPNTFQPTIVSGSWDR            |
| 193 - 200   | 1034.47  | 1033.46   | 1033.50   | -0.04 | 0 VVWNLNCK                     |
| 230 - 243   | 1572.76  | 1571.76   | 1571.83   | -0.07 | 1 DGVTLWDLAEGKR                |
| 244 - 262   | 2150.00  | 2149.00   | 2149.06   | -0.06 | 0 LYSLDAGSIHSLCFSPNR           |
| 263 - 274   | 1455.63  | 1454.63   | 1454.69   | -0.06 | 0 YWLCAATQDSIK                 |
| 275 - 281   | 890.45   | 889.45    | 889.45    | -0.00 | 0 IWDLESK                      |
| 282 - 295   | 1602.85  | 1601.85   | 1601.91   | -0.07 | 0 HIVQDLKPEIPVSK               |

### Spot 1265

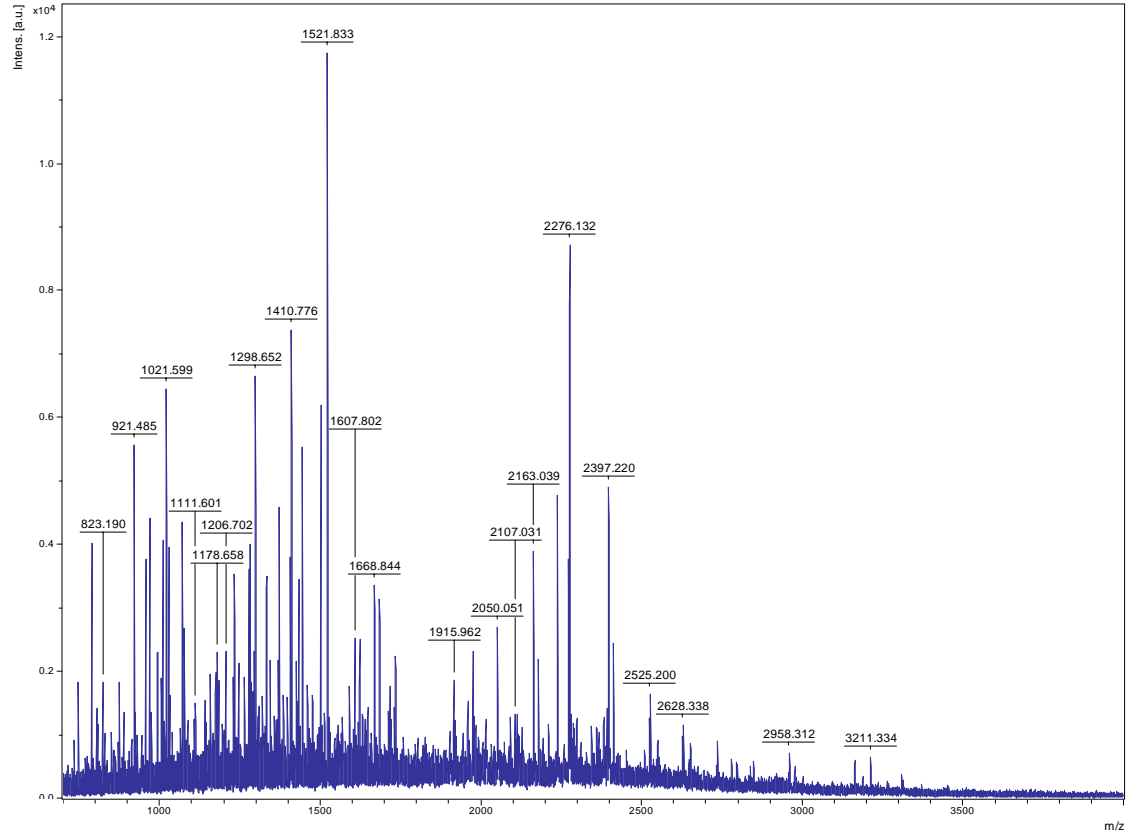

Match to: gi|50916753 Score: 274 Expect: 2.7e-23

#### Matched peptides:

| Start - End | Observed  | Mr (expt) | Mr (calc) | Delta   | Miss Sequence                               |
|-------------|-----------|-----------|-----------|---------|---------------------------------------------|
| 84 - 105    | 2525.2002 | 2524.1929 | 2524.2155 | -0.0226 | 0 R.ITQQEFTEMAWQSIIVSSPEVAK.E Oxidation (M) |
| 157 - 168   | 1246.6561 | 1245.6489 | 1245.6023 | 0.0466  | 0 K.VLGEDPGSMLGR.D Oxidation (M)            |
| 169 - 176   | 957.6039  | 956.5966  | 956.5291  | 0.0675  | 0 R.DLEALIQR.A                              |
| 183 - 203   | 2397.2205 | 2396.2132 | 2396.1647 | 0.0484  | 1 K.EYGDSEVSVLHVLVGFADKRF                   |
| 211 - 220   | 1178.6582 | 1177.6509 | 1177.6343 | 0.0167  | 0 K.DFQITVQSLK.T                            |
| 273 - 279   | 889.5727  | 888.5654  | 888.4851  | 0.0803  | 0 R.CIQLSR.R Carbamidomethyl (C)            |
| 296 - 305   | 1029.6262 | 1028.6189 | 1028.5614 | 0.0575  | 0 K.TAIAEGLAQR.I                            |
| 306 - 318   | 1410.7760 | 1409.7687 | 1409.7626 | 0.0061  | 0 R.IVQGDVPQALNRR                           |
| 334 - 341   | 1071.5447 | 1070.5374 | 1070.4781 | 0.0593  | 1 K.YRGEFEDRL                               |
| 393 - 404   | 1369.6010 | 1368.5937 | 1368.6707 | -0.0770 | 1 R.CIGATTLDEYRK.Y                          |
| 393 - 404   | 1426.7064 | 1425.6991 | 1425.6922 | 0.0070  | 1 R.CIGATTLDEYRK.Y Carbamidomethyl (C)      |
| 405 - 414   | 1233.6768 | 1232.6695 | 1232.6401 | 0.0294  | 1 K.YIEKDPALER.R                            |
| 415 - 434   | 2393.2324 | 2392.2251 | 2392.2386 | -0.0135 | 1 R.RFQQVYVDQPSVEDTISILR.G                  |
| 416 - 434   | 2237.1372 | 2236.1299 | 2236.1375 | -0.0076 | 0 R.FQQVYVDQPSVEDTISILR.G                   |
| 438 - 447   | 1295.6823 | 1294.6750 | 1294.6530 | 0.0220  | 1 R.ERYELHHGVR.I                            |
| 440 - 447   | 1010.5863 | 1009.5790 | 1009.5093 | 0.0697  | 0 R.YELHHGVR.I                              |
| 448 - 462   | 1501.8265 | 1500.8193 | 1500.8147 | 0.0045  | 0 R.ISDSALVAAALLSDR.Y                       |
| 468 - 483   | 1731.9137 | 1730.9064 | 1730.9090 | -0.0026 | 1 R.FLPDKAIDLVDESAAR.L                      |
| 486 - 500   | 1718.8616 | 1717.8543 | 1717.8556 | -0.0013 | 0 K.MEITSKPTALDEIDR.A                       |
| 486 - 500   | 1734.8177 | 1733.8105 | 1733.8505 | -0.0401 | 0 K.MEITSKPTALDEIDR.A Oxidation (M)         |
| 501 - 509   | 1088.6338 | 1087.6265 | 1087.6059 | 0.0206  | 1 R.AVIKLEMER.L                             |
| 510 - 518   | 1006.5696 | 1005.5623 | 1005.4978 | 0.0645  | 0 R.LSLTNDTDK.A                             |
| 538 - 547   | 1332.6710 | 1331.6637 | 1331.6470 | 0.0168  | 1 K.QKDLTEQWER.E                            |
| 540 - 547   | 1076.5653 | 1075.5580 | 1075.4934 | 0.0646  | 0 K.DLTEQWER.E                              |
| 555 - 564   | 1230.6705 | 1229.6633 | 1229.6615 | 0.0017  | 1 K.IQSIKEIDR.V                             |
| 565 - 574   | 1185.6646 | 1184.6573 | 1184.6149 | 0.0424  | 0 R.VNVEIQQAER.E                            |
| 586 - 594   | 1021.5993 | 1020.5920 | 1020.5352 | 0.0568  | 0 K.YGSLNALQR.Q                             |
| 612 - 629   | 2091.0288 | 2090.0215 | 2090.0313 | -0.0098 | 1 K.SMLREEVTQDDIAEIVSR.W                    |
| 612 - 629   | 2107.0315 | 2106.0242 | 2106.0262 | -0.0020 | 1 K.SMLREEVTQDDIAEIVSR.W Oxidation (M)      |
| 646 - 655   | 1286.7136 | 1285.7063 | 1285.6918 | 0.0146  | 0 K.LLYLEELHKR.R                            |
| 646 - 656   | 1442.8040 | 1441.7967 | 1441.7929 | 0.0038  | 1 K.LLYLEELHKR.V                            |
| 666 - 673   | 873.5546  | 872.5473  | 872.4715  | 0.0757  | 0 K.AVSEAIQR.S                              |
| 704 - 718   | 1668.8440 | 1667.8367 | 1667.8340 | 0.0027  | 0 K.ALAAFMFNTEEAIVR.I                       |
| 704 - 718   | 1684.8395 | 1683.8322 | 1683.8290 | 0.0032  | 0 K.ALAAFMFNTEEAIVR.I Oxidation (M)         |
| 719 - 732   | 1711.8865 | 1710.8792 | 1710.7705 | 0.1087  | 1 R.IDMSEYMEKHSVSR.L                        |
| 733 - 754   | 2276.1323 | 2275.1250 | 2275.1483 | -0.0233 | 0 R.LIGAPPYVGYEEGQLTEAVR.R                  |
| 756 - 768   | 1622.8555 | 1621.8482 | 1621.8715 | -0.0233 | 0 R.RPYSIILFDEIEK.A                         |
| 769 - 785   | 1915.9625 | 1914.9552 | 1914.9587 | -0.0035 | 0 K.AHGDFVNFVFLQDDGR.V                      |
| 833 - 848   | 1958.0095 | 1957.0022 | 1956.9298 | 0.0725  | 1 R.VMDAARSVFRPEFMNR.I 2 Oxidation (M)      |
| 839 - 848   | 1282.6558 | 1281.6485 | 1281.6288 | 0.0197  | 0 R.SVFRPEFMNR.I                            |
| 839 - 848   | 1298.6517 | 1297.6445 | 1297.6237 | 0.0208  | 0 R.SVFRPEFMNR.I Oxidation (M)              |
| 849 - 860   | 1521.8333 | 1520.8260 | 1520.8238 | 0.0022  | 0 R.IDEYIVFKPLER.E                          |
| 885 - 910   | 2735.3271 | 2734.3199 | 2734.3965 | -0.0766 | 0 K.LEVSPGAVEFLGSLGYDPNYGARPVK.R            |
| 911 - 923   | 1589.8221 | 1588.8149 | 1588.8572 | -0.0424 | 1 K.RVIQQYVENELAK.G                         |
| 912 - 923   | 1433.7596 | 1432.7524 | 1432.7561 | -0.0038 | 0 R.VIQQYVENELAK.G                          |
| 928 - 954   | 2958.3118 | 2957.3045 | 2957.4617 | -0.1573 | 1 R.GDFKDEDSILVDTQVTPVSNGLPQQK.L            |

Match to: gi|50878307 Score: 102 Expect: 4.2e-06

#### Matched peptides:

| Start - End | Observed  | Mr (expt) | Mr (calc) | Delta   | Miss Sequence       |
|-------------|-----------|-----------|-----------|---------|---------------------|
| 1 - 12      | 1332.6710 | 1331.6637 | 1331.6802 | -0.0164 | 1 -.MPSVSRAVCVQR.A  |
| 38 - 48     | 1233.6768 | 1232.6695 | 1232.7101 | -0.0406 | 1 R.ARHKPEVAIR.S    |
| 40 - 48     | 1006.5696 | 1005.5623 | 1005.5719 | -0.0096 | 0 R.HGKPEVAIR.S     |
| 156 - 168   | 1406.8496 | 1405.8423 | 1405.8405 | 0.0018  | 0 R.LGDPARPLLLSVR.S |



|           |           |           |           |         |   |                                               |
|-----------|-----------|-----------|-----------|---------|---|-----------------------------------------------|
| 203 - 209 | 921.4850  | 920.4778  | 920.4028  | 0.0750  | 0 | R.FAYDSYR.R                                   |
| 231 - 238 | 889.5727  | 888.5654  | 888.5102  | 0.0552  | 1 | K.LEAMKAVK.G                                  |
| 341 - 360 | 2178.1418 | 2177.1346 | 2177.1479 | -0.0134 | 1 | K.KLYGEFLVNAQGEDVVAGIR.T                      |
| 342 - 360 | 2050.0508 | 2049.0435 | 2049.0530 | -0.0095 | 0 | K.LYGEFLVNAQGEDVVAGIR.T                       |
| 405 - 414 | 1292.7023 | 1291.6950 | 1291.6529 | 0.0421  | 1 | R.LWMLQCRTGK.R Carbamidomethyl (C)            |
| 423 - 435 | 1444.7501 | 1443.7428 | 1443.7391 | 0.0038  | 0 | K.IAVDMVNEGLVER.R                             |
| 423 - 435 | 1460.7687 | 1459.7614 | 1459.7340 | 0.0274  | 0 | K.IAVDMVNEGLVER.R Oxidation (M)               |
| 503 - 523 | 2112.0435 | 2111.0362 | 2111.0316 | 0.0045  | 0 | R.TETSPEDVGGMHAAVGILTAR.G                     |
| 625 - 635 | 1174.6139 | 1173.6066 | 1173.5560 | 0.0506  | 0 | R.QNGAEGIGLCR.T Carbamidomethyl (C)           |
| 625 - 646 | 2525.2002 | 2524.1929 | 2524.1223 | 0.0707  | 1 | R.QNGAEGIGLCRTEHMFASDER.I Carbamidomethyl (C) |
| 636 - 646 | 1369.6010 | 1368.5937 | 1368.5768 | 0.0169  | 0 | R.TEHMFFASDER.I                               |
| 636 - 646 | 1385.6030 | 1384.5958 | 1384.5717 | 0.0240  | 0 | R.TEHMFFASDER.I Oxidation (M)                 |
| 652 - 662 | 1278.6826 | 1277.6753 | 1277.6471 | 0.0282  | 0 | R.QMIMASSLELR.Q                               |
| 675 - 682 | 970.5406  | 969.5333  | 969.4556  | 0.0778  | 0 | R.SDFEGIFR.A                                  |
| 683 - 692 | 1088.6338 | 1087.6265 | 1087.5695 | 0.0570  | 0 | R.AMDGLPVTIRL.L Oxidation (M)                 |
| 713 - 728 | 1734.8177 | 1733.8105 | 1733.7890 | 0.0215  | 0 | R.ELCSETGAAQDDVLAR.V Carbamidomethyl (C)      |
| 713 - 731 | 2091.0288 | 2090.0215 | 2089.9949 | 0.0266  | 1 | R.ELCSETGAAQDDVLARVEK.L Carbamidomethyl (C)   |
| 732 - 742 | 1262.6857 | 1261.6784 | 1261.6488 | 0.0296  | 0 | K.LSEVNPMLGFR.G                               |
| 746 - 759 | 1607.8025 | 1606.7952 | 1606.8024 | -0.0072 | 0 | R.LGISYPELTEMQAR.A                            |
| 861 - 882 | 2628.3384 | 2627.3311 | 2627.3747 | -0.0436 | 0 | K.FLPIYLSQGLQHPFEVLDQR.G                      |
| 904 - 922 | 1974.9910 | 1973.9837 | 1973.9668 | 0.0169  | 0 | K.VGICGEHGGEPLSVAFFAK.A Carbamidomethyl (C)   |
| 923 - 934 | 1371.6462 | 1370.6390 | 1370.6288 | 0.0101  | 0 | K.AGLDYVSCSPFR.V Carbamidomethyl (C)          |

### Spot 1270

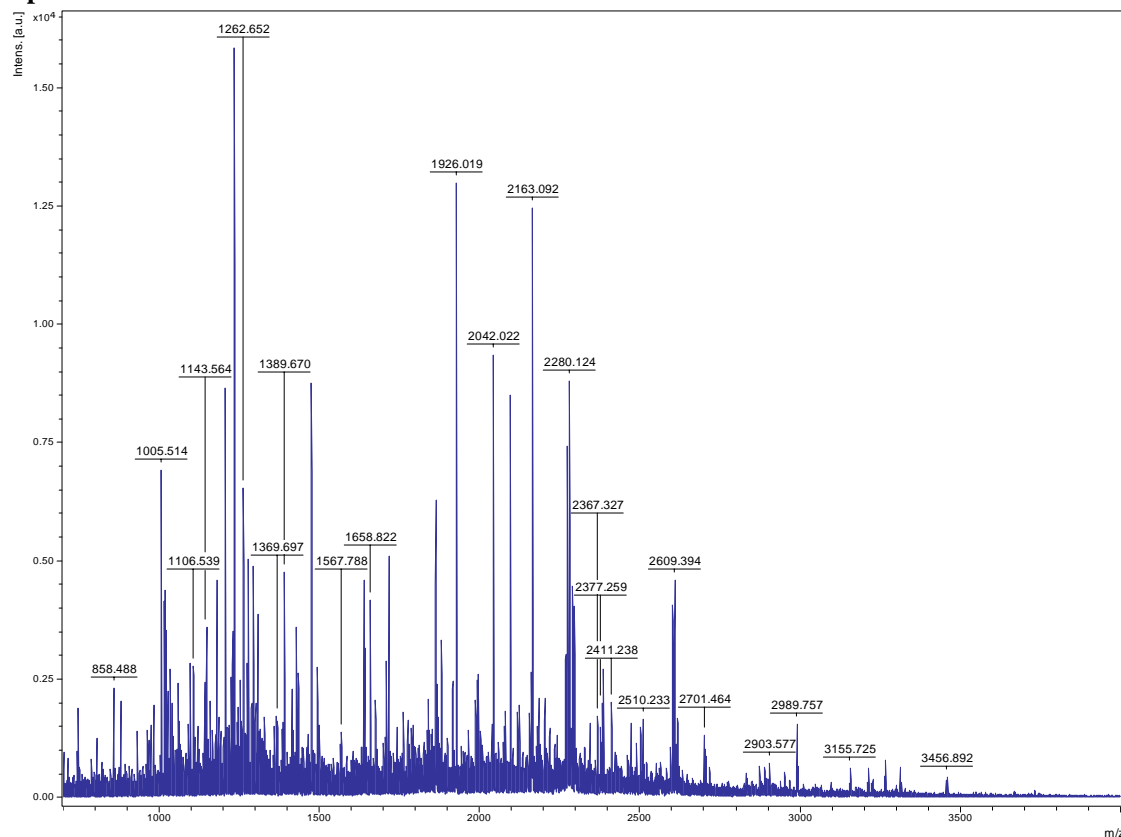

Match to: gi|401140; Score: 202

#### Matched peptides:

| Start - End | Observed | Mr (expt) | Mr (calc) | Delta | Miss Sequence                            |
|-------------|----------|-----------|-----------|-------|------------------------------------------|
| 1 - 12      | 1277.69  | 1276.69   | 1276.62   | 0.07  | 1 MGEAAGDRVLSR Oxidation (M)             |
| 20 - 37     | 1926.02  | 1925.02   | 1925.00   | 0.02  | 0 IGDLSAHPNELVAVFTR                      |
| 44 - 66     | 2601.40  | 2600.39   | 2600.27   | 0.13  | 1 GMLQAHQIIAEYNNNAISEADREK               |
| 44 - 66     | 2617.39  | 2616.38   | 2616.26   | 0.12  | 1 GMLQAHQIIAEYNNNAISEADREK Oxidation (M) |
| 67 - 77     | 1262.65  | 1261.65   | 1261.67   | -0.02 | 1 LKDGAFEDVLR                            |
| 69 - 77     | 1021.51  | 1020.50   | 1020.49   | 0.02  | 0 DGAFEDVLR                              |
| 157 - 167   | 1204.62  | 1203.62   | 1203.64   | -0.01 | 0 SIGNVQFLNR                             |
| 173 - 188   | 2039.04  | 2038.04   | 2038.03   | 0.01  | 1 LFHDKESMYPLLNFLR Oxidation (M)         |
| 194 - 204   | 1369.70  | 1368.69   | 1368.63   | 0.06  | 1 GMTMMLNDRIR 2 Oxidation (M)            |
| 205 - 214   | 1015.59  | 1014.59   | 1014.58   | 0.01  | 0 SLSALQGALR                             |
| 215 - 235   | 2411.24  | 2410.24   | 2410.13   | 0.11  | 1 KAEELHSGLSADTPYSEFHHR                  |
| 236 - 243   | 963.51   | 962.51    | 962.51    | 0.00  | 0 FQELGLEK                               |
| 317 - 325   | 1106.54  | 1105.54   | 1105.53   | 0.01  | 0 AMENEMLLR                              |
| 328 - 336   | 1026.57  | 1025.57   | 1025.56   | 0.01  | 0 QQGLNITPR                              |
| 343 - 355   | 1389.67  | 1388.67   | 1388.67   | -0.00 | 0 LLPDATGTTCCGQR                         |
| 359 - 369   | 1275.69  | 1274.69   | 1274.71   | -0.02 | 0 VLGTEHTHLR                             |
| 432 - 445   | 1567.79  | 1566.79   | 1566.76   | 0.02  | 0 MGVTHTCTIAHALEK                        |
| 446 - 456   | 1414.70  | 1413.70   | 1413.69   | 0.01  | 1 TKYPNSDLYWK                            |
| 494 - 512   | 2203.05  | 2202.05   | 2201.99   | 0.06  | 0 DTVGQYESHMAFTMPGLYR                    |
| 524 - 543   | 2280.12  | 2279.12   | 2279.06   | 0.06  | 0 FNVISPGADMMSIYFPYSES                   |
| 524 - 543   | 2296.18  | 2295.18   | 2295.05   | 0.12  | 0 FNVISPGADMMSIYFPYSES Oxidation (M)     |
| 546 - 567   | 2609.39  | 2608.39   | 2608.27   | 0.13  | 0 LLSLHPEIEELLVSEVDNNEHK                 |
| 603 - 621   | 2078.08  | 2077.08   | 2077.06   | 0.02  | 0 LQELVNLVVGCDHGNPSK                     |
| 632 - 646   | 1862.92  | 1861.92   | 1861.91   | 0.00  | 0 MFDLIEQYNLNHR                          |
| 632 - 646   | 1878.93  | 1877.92   | 1877.91   | 0.01  | 0 MFDLIEQYNLNHR Oxidation (M)            |
| 647 - 654   | 1005.51  | 1004.51   | 1004.49   | 0.03  | 0 WISAQMNR                               |
| 723 - 733   | 1253.65  | 1252.64   | 1252.67   | -0.03 | 0 ASALLVEFFEK                            |
| 744 - 751   | 858.49   | 857.49    | 857.47    | 0.01  | 0 ISQGLQR                                |
| 752 - 759   | 1096.58  | 1095.58   | 1095.56   | 0.02  | 1 IEKYTWK                                |
| 777 - 783   | 880.48   | 879.47    | 879.44    | 0.03  | 0 YVSNLER                                |
| 789 - 797   | 1143.56  | 1142.56   | 1142.60   | -0.04 | 0 YLEMLYALK                              |

Match to: gi|51090952; Score: 89

#### Matched peptides:

| Start - End | Observed | Mr (expt) | Mr (calc) | Delta | Miss Sequence                          |
|-------------|----------|-----------|-----------|-------|----------------------------------------|
| 51 - 72     | 2472.29  | 2471.29   | 2471.20   | 0.09  | 0 HSDGLPHLNQAAEATWMGLLPR               |
| 51 - 72     | 2488.30  | 2487.29   | 2487.20   | 0.10  | 0 HSDGLPHLNQAAEATWMGLLPR Oxidation (M) |
| 74 - 87     | 1674.84  | 1673.84   | 1673.85   | -0.02 | 1 AGPRDELWDLALYR                       |
| 92 - 113    | 2095.06  | 2094.06   | 2094.01   | 0.05  | 0 GGGDVGGEPAGFLSPASLHDVR               |
| 151 - 169   | 2042.02  | 2041.02   | 2040.99   | 0.03  | 0 LPTVGEPEYGGWEAPDGLR                  |
| 242 - 257   | 1761.90  | 1760.89   | 1760.91   | -0.02 | 0 IMQGLLDQYTLAGNPK                     |
| 275 - 284   | 1277.69  | 1276.69   | 1276.71   | -0.03 | 1 KLIQEYSIQR                           |
| 276 - 284   | 1149.61  | 1148.60   | 1148.62   | -0.01 | 0 LIQEYSIQR                            |
| 353 - 363   | 1369.70  | 1368.69   | 1368.70   | -0.01 | 1 RYEVVDQLYK                           |
| 354 - 363   | 1213.63  | 1212.63   | 1212.60   | 0.03  | 0 YEVVDQLYK                            |
| 402 - 416   | 1742.82  | 1741.81   | 1741.82   | -0.00 | 0 ISSNEETCATYNLLK                      |
| 430 - 436   | 983.43   | 982.43    | 982.41    | 0.02  | 0 YTDHYER                              |
| 448 - 464   | 1864.92  | 1863.92   | 1863.94   | -0.02 | 1 GKEPGVMYFLPMGPGR Oxidation (M)       |
| 448 - 464   | 1880.95  | 1879.95   | 1879.93   | 0.02  | 1 GKEPGVMYFLPMGPGR 2 Oxidation (M)     |
| 450 - 466   | 1878.93  | 1877.92   | 1877.95   | -0.03 | 1 EPGVMYFLPMGPGRSK                     |
| 592 - 615   | 2594.40  | 2593.40   | 2593.36   | 0.03  | 1 LNLTSAGDFLSVTKLWGDDTLCLK             |
| 606 - 615   | 1147.55  | 1146.54   | 1146.59   | -0.05 | 0 LWGDDTLCLK                           |
| 865 - 878   | 1564.78  | 1563.78   | 1563.77   | 0.01  | 0 LYHPLSFSATGTRD                       |

# Spot 1275

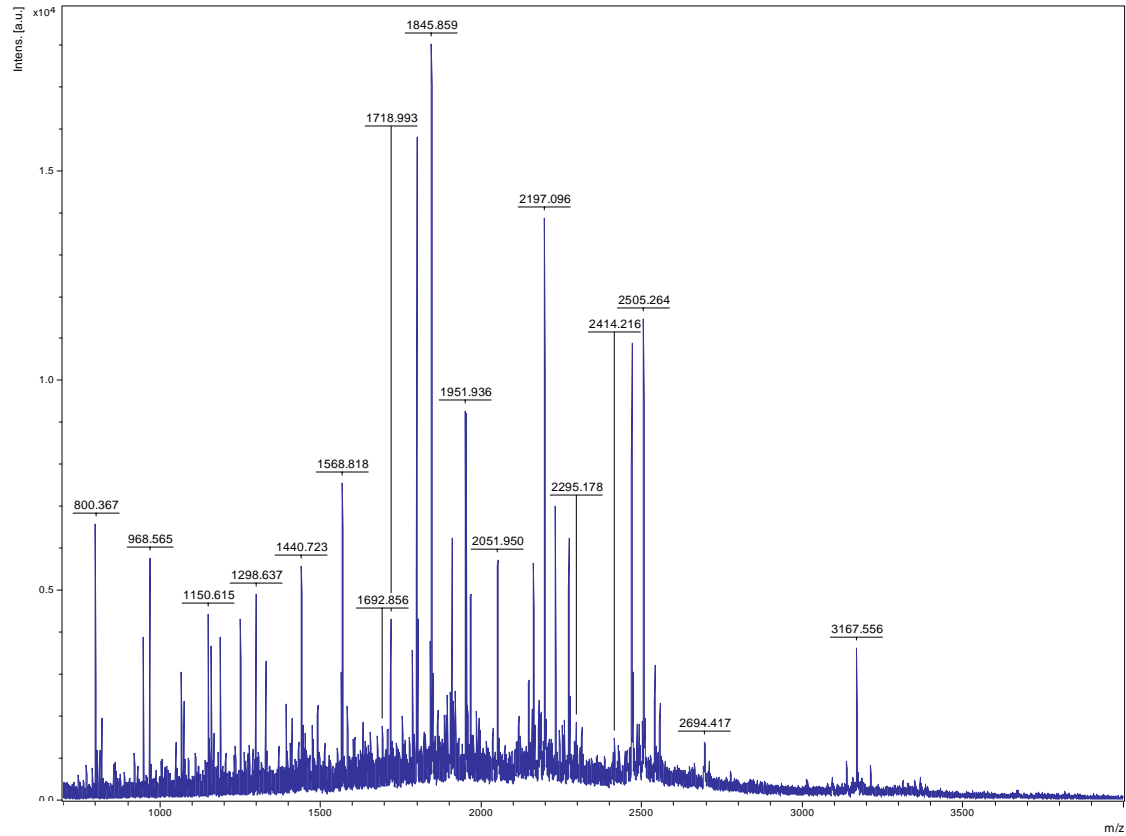

Match to: gj|37534770 Score: 176 Expect: 1.7e-13

| Start - End | Observed  | Mr (expt) | Mr (calc) | Delta   | Miss Sequence                                                      |
|-------------|-----------|-----------|-----------|---------|--------------------------------------------------------------------|
| 18 - 26     | 1067.5426 | 1066.5353 | 1066.5295 | 0.0059  | 0 K.DYSTAILER.K                                                    |
| 33 - 55     | 2540.2029 | 2539.1956 | 2539.1860 | 0.0096  | 0 R.LVVDEATNDDNSVVALHPDTMER.L                                      |
| 33 - 55     | 2556.2386 | 2555.2313 | 2555.1809 | 0.0504  | 0 R.LVVDEATNDDNSVVALHPDTMER.L Oxidation (M)                        |
| 73 - 88     | 1892.8714 | 1891.8641 | 1891.8543 | 0.0098  | 0 K.DTICIVLADETCPEPK.I 2 Carbamidomethyl (C)                       |
| 103 - 116   | 1583.8277 | 1582.8204 | 1582.7773 | 0.0431  | 0 R.LGDVVSVHQCDVK.Y Carbamidomethyl (C)                            |
| 155 - 162   | 947.5618  | 946.5545  | 946.5600  | -0.0054 | 1 R.KGDLFLVR.G                                                     |
| 172 - 198   | 3167.4236 | 3166.4163 | 3166.4838 | -0.0675 | 1 K.VIETDPTEYICVAPDTEIFCDGPIKRE. 2 Carbamidomethyl (C)             |
| 199 - 216   | 2051.9363 | 2050.9290 | 2050.9079 | 0.0212  | 1 R.EDEERLDEYGVDDVGGVR.K                                           |
| 224 - 231   | 968.5748  | 967.5675  | 967.5702  | -0.0027 | 0 R.ELVELPLR.H                                                     |
| 224 - 237   | 1719.0162 | 1718.0089 | 1717.9879 | 0.0211  | 1 R.ELVELPLRHPQLFK.S                                               |
| 246 - 257   | 1158.6798 | 1157.6725 | 1157.6444 | 0.0281  | 0 K.GILLYGPPGSGK.T                                                 |
| 263 - 283   | 2256.1264 | 2255.1191 | 2255.1295 | -0.0104 | 0 R.AVANETGAFFFLINGPEIMSK.L                                        |
| 284 - 293   | 1075.5567 | 1074.5494 | 1074.5305 | 0.0189  | 0 K.LAGESESNLR.K                                                   |
| 330 - 342   | 1446.8457 | 1445.8384 | 1445.8163 | 0.0221  | 0 R.IVSQLLTMDGLK.A Oxidation (M)                                   |
| 366 - 371   | 797.3653  | 796.3580  | 796.3980  | -0.0400 | 1 R.FGRFDR.E                                                       |
| 372 - 383   | 1298.6977 | 1297.6904 | 1297.6513 | 0.0391  | 0 R.EIDGVPDEVGRL                                                   |
| 372 - 388   | 1909.0488 | 1908.0415 | 1908.0316 | 0.0100  | 1 R.EIDGVPDEVGRLVLR.I                                              |
| 408 - 430   | 2448.1864 | 2447.1791 | 2447.1573 | 0.0219  | 0 K.DTHGYVGADLAALCTEALQCIRE. Carbamidomethyl (C)                   |
| 408 - 430   | 2505.1751 | 2504.1678 | 2504.1787 | -0.0109 | 0 K.DTHGYVGADLAALCTEALQCIRE. 2 Carbamidomethyl (C)                 |
| 460 - 471   | 1187.6532 | 1186.6459 | 1186.6306 | 0.0154  | 0 K.TALGTSNPSALR.E                                                 |
| 472 - 492   | 2313.1296 | 2312.1223 | 2312.1535 | -0.0312 | 0 R.ETVVEVPNVSWEDIGLLENVK.R                                        |
| 472 - 493   | 2469.2422 | 2468.2349 | 2468.2546 | -0.0197 | 1 R.ETVVEVPNVSWEDIGLLENVK.R.E                                      |
| 528 - 539   | 1251.6447 | 1250.6374 | 1250.6117 | 0.0257  | 0 K.GVLFYGPPEGCK.T Carbamidomethyl (C)                             |
| 545 - 558   | 1564.8151 | 1563.8078 | 1563.7715 | 0.0364  | 0 K.AIANECQANFISVK.G Carbamidomethyl (C)                           |
| 559 - 575   | 1951.9213 | 1950.9140 | 1950.9145 | -0.0005 | 0 K.GPELLTMWFGESEANVR.E Oxidation (M)                              |
| 583 - 601   | 2180.0650 | 2179.0577 | 2179.0255 | 0.0322  | 0 R.QSAPCVLFFDELDSIATOR.G Carbamidomethyl (C); Pyro-glu (N-term Q) |
| 583 - 601   | 2197.0541 | 2196.0468 | 2196.0521 | -0.0053 | 0 R.QSAPCVLFFDELDSIATOR.G Carbamidomethyl (C)                      |
| 615 - 629   | 1676.8616 | 1675.8543 | 1675.8273 | 0.0271  | 0 R.VLNQLLTEMGMNAK.K                                               |
| 615 - 629   | 1692.8698 | 1691.8625 | 1691.8222 | 0.0403  | 0 R.VLNQLLTEMGMNAK.K Oxidation (M)                                 |
| 615 - 629   | 1708.8518 | 1707.8445 | 1707.8171 | 0.0274  | 0 R.VLNQLLTEMGMNAK.K 2 Oxidation (M)                               |
| 654 - 668   | 1799.9754 | 1798.9681 | 1798.9465 | 0.0216  | 0 R.LDQLIYIPLPDEQSR.L                                              |
| 679 - 692   | 1440.7753 | 1439.7680 | 1439.7983 | -0.0303 | 1 K.SPVAKDVLNALAK.Y                                                |
| 693 - 708   | 1845.8625 | 1844.8552 | 1844.8363 | 0.0190  | 0 K.YTQGFSGADITEICQR.A Carbamidomethyl (C)                         |
| 769 - 781   | 1568.8633 | 1567.8560 | 1567.8107 | 0.0454  | 1 R.KYQAFATLQQR.S.G                                                |
| 782 - 788   | 799.3377  | 798.3304  | 798.3660  | -0.0356 | 0 R.GFGSEFR.F                                                      |

### Spot 1276

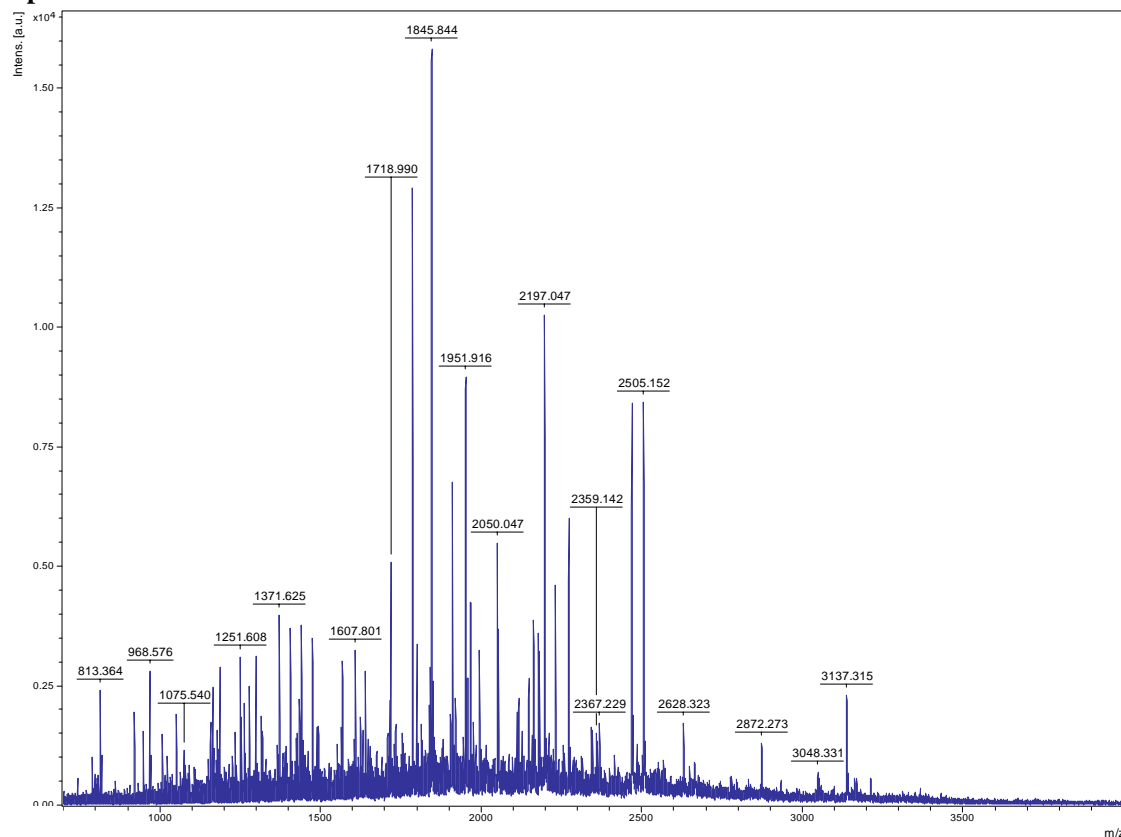

Match to: gi|37534770 Score: 112 Expect: 4.2e-07

#### Matched peptides:

| Start - End | Observed  | Mr (expt) | Mr (calc) | Delta   | Miss Sequence                                    |
|-------------|-----------|-----------|-----------|---------|--------------------------------------------------|
| 101 - 116   | 1839.0117 | 1838.0044 | 1837.9468 | 0.0576  | 1 R.VRLGDVSVHQCQDVK.Y Carbamidomethyl (C)        |
| 224 - 237   | 1719.0326 | 1718.0253 | 1717.9879 | 0.0375  | 1 R.ELVELPLRHPQLFK.S                             |
| 263 - 283   | 2256.2251 | 2255.2178 | 2255.1295 | 0.0883  | 0 R.AVANETGAFFFLINGPEIMSK.L                      |
| 345 - 364   | 2148.2288 | 2147.2215 | 2147.1269 | 0.0946  | 0 R.SHVIVMGATNRPNSIDPALR.R                       |
| 372 - 383   | 1298.6249 | 1297.6176 | 1297.6513 | -0.0337 | 0 R.EIDIGVPDEVGR.L                               |
| 372 - 388   | 1909.0977 | 1908.0904 | 1908.0316 | 0.0589  | 1 R.EIDIGVPDEVGRLEVLRI                           |
| 408 - 430   | 2505.2969 | 2504.2896 | 2504.1787 | 0.1109  | 0 K.DTHGYVGDALALCTEALQCIRE.2 Carbamidomethyl (C) |
| 460 - 471   | 1187.5745 | 1186.5672 | 1186.6306 | -0.0633 | 0 K.TALGTSNPSALRE                                |
| 472 - 493   | 2469.3623 | 2468.3550 | 2468.2546 | 0.1004  | 1 R.ETVVEVPNVSWEDIGLLENVKE.E                     |
| 559 - 575   | 1952.0021 | 1950.9948 | 1950.9145 | 0.0803  | 0 K.GPELLTMWFGSEANVRE Oxidation (M)              |
| 581 - 601   | 2367.3536 | 2366.3463 | 2366.1688 | 0.1775  | 1 K.ARQSAPCVLFDELDSIATQR.G                       |
| 583 - 601   | 2197.1446 | 2196.1373 | 2196.0521 | 0.0852  | 0 R.QSAPCVLFFDELDSIATQR.G Carbamidomethyl (C)    |
| 615 - 629   | 1708.8931 | 1707.8858 | 1707.8171 | 0.0687  | 0 R.VLNQLLTEMDEGMNAK.K 2 Oxidation (M)           |
| 654 - 668   | 1800.0062 | 1798.9989 | 1798.9465 | 0.0524  | 0 R.LDQLIYPLPDEQSR.L                             |
| 693 - 708   | 1845.9017 | 1844.8944 | 1844.8363 | 0.0582  | 0 K.YTQGFSGADITEICQR.A Carbamidomethyl (C)       |
| 769 - 781   | 1568.8479 | 1567.8406 | 1567.8107 | 0.0300  | 1 R.KYQAFATLQQSR.G                               |
| 770 - 781   | 1440.7296 | 1439.7223 | 1439.7157 | 0.0066  | 0 K.YQAFATLQQSR.G                                |

Match to: gi|50878307 Score: 75 Expect: 0.002

#### Matched peptides:

| Start - End | Observed  | Mr (expt) | Mr (calc) | Delta   | Miss Sequence                                 |
|-------------|-----------|-----------|-----------|---------|-----------------------------------------------|
| 21 - 30     | 947.4144  | 946.4071  | 946.4402  | -0.0331 | 1 R.CRDGAAAAGR.R                              |
| 156 - 168   | 1406.8348 | 1405.8275 | 1405.8405 | -0.0130 | 0 R.LGDPARPLLSVR.S                            |
| 277 - 293   | 1944.1064 | 1943.0991 | 1943.0264 | 0.0727  | 0 K.QLQAVLAVFNSWDSRPA                         |
| 277 - 296   | 2256.2251 | 2255.2178 | 2255.2426 | -0.0247 | 1 K.QLQAVLAVFNSWDSRAIK.Y                      |
| 341 - 360   | 2178.2403 | 2177.2330 | 2177.1479 | 0.0851  | 1 K.KLYGEFLVNAQGEDVVAGIR.T                    |
| 342 - 360   | 2050.1498 | 2049.1425 | 2049.0530 | 0.0895  | 0 K.LYGEFLVNAQGEDVVAGIR.T                     |
| 419 - 435   | 1800.0062 | 1798.9989 | 1798.9610 | 0.0379  | 1 K.GAVKIVDMVNEGLVER.R                        |
| 423 - 435   | 1444.7446 | 1443.7373 | 1443.7391 | -0.0018 | 0 K.IAVDMVNEGLVER.R                           |
| 503 - 523   | 2112.1177 | 2111.1104 | 2111.0316 | 0.0788  | 0 R.TETSPEDVGGMHAAVGILTAR.G                   |
| 503 - 523   | 2128.1392 | 2127.1319 | 2127.0266 | 0.1054  | 0 R.TETSPEDVGGMHAAVGILTAR.G Oxidation (M)     |
| 693 - 712   | 2359.2656 | 2358.2583 | 2358.1678 | 0.0906  | 0 R.LLDPLLHEFLPEGHVEDMVR.E Oxidation (M)      |
| 713 - 728   | 1734.8894 | 1733.8821 | 1733.7890 | 0.0931  | 0 R.ELCSETGAAQDDVLAR.V Carbamidomethyl (C)    |
| 732 - 742   | 1262.6251 | 1261.6178 | 1261.6488 | -0.0310 | 0 K.LSEVNPMLGFR.G                             |
| 746 - 759   | 1607.8385 | 1606.8312 | 1606.8024 | 0.0288  | 0 R.LGISYPELTEMQAR.A                          |
| 861 - 882   | 2628.4992 | 2627.4919 | 2627.3747 | 0.1172  | 0 K.FLPIYLSQGLQHPPEVLDQR.G                    |
| 904 - 922   | 1975.0577 | 1974.0504 | 1973.9668 | 0.0836  | 0 K.VGICGEHGGEPLSVAFFAK.A Carbamidomethyl (C) |

Spot 1287

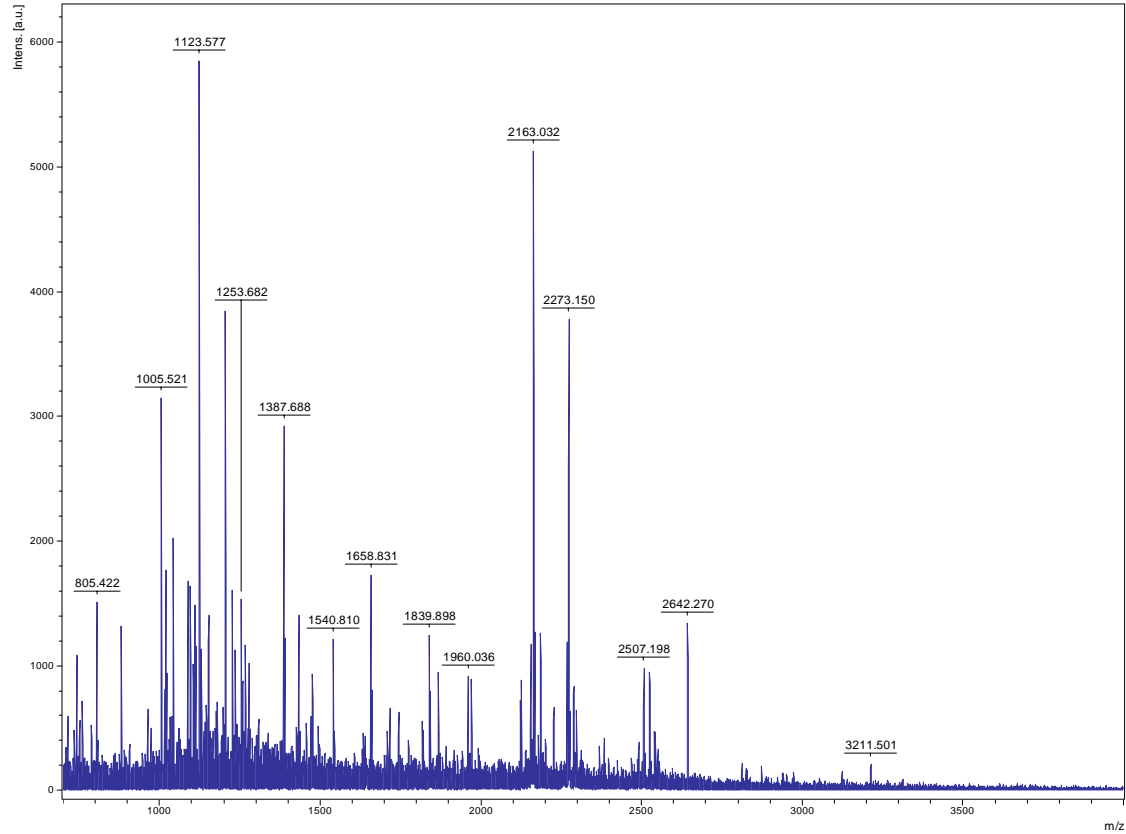

Match to: gi|267056 Score: 218 Expect: 2.3e-17

Matched peptides:

| Start - End | Observed  | Mr (expt) | Mr (calc) | Delta   | Miss Sequence                               |
|-------------|-----------|-----------|-----------|---------|---------------------------------------------|
| 15 - 32     | 1960.0361 | 1959.0289 | 1959.0213 | 0.0075  | 0 R.LGATFSSHPNELIALFSR.Y                    |
| 44 - 60     | 1970.0144 | 1969.0071 | 1969.0156 | -0.0085 | 1 R.HQLLAEPDALIEADKEK.Y                     |
| 61 - 69     | 1123.5771 | 1122.5699 | 1122.5709 | -0.0011 | 0 K.YAPFEDILR.A                             |
| 97 - 116    | 2226.1362 | 2225.1290 | 2225.1466 | -0.0177 | 0 R.VNVSELAVEELSVSEYLAFKE                   |
| 149 - 159   | 1204.6433 | 1203.6360 | 1203.6360 | 0.0001  | 0 K.SIGNGVQFLNR.H                           |
| 228 - 235   | 963.5202  | 962.5129  | 962.5072  | 0.0057  | 0 R.FOELGLEK.G                              |
| 309 - 317   | 1088.5782 | 1087.5710 | 1087.5695 | 0.0014  | 0 R.ALENEMLLR.I                             |
| 309 - 317   | 1104.5696 | 1103.5623 | 1103.5645 | -0.0021 | 0 R.ALENEMLLR.I Oxidation (M)               |
| 335 - 347   | 1387.6880 | 1386.6807 | 1386.6925 | -0.0118 | 0 R.LLPDAVGTTCGQR.V Carbamidomethyl (C)     |
| 335 - 350   | 1743.8873 | 1742.8801 | 1742.8985 | -0.0184 | 1 R.LLPDAVGTTCGQRVEK.V Carbamidomethyl (C)  |
| 351 - 361   | 1253.6820 | 1252.6747 | 1252.6775 | -0.0028 | 0 K.VIGTEHTDILR.V                           |
| 424 - 437   | 1540.8097 | 1539.8024 | 1539.8079 | -0.0055 | 0 K.LGVVTQCTIAHALEK.T Carbamidomethyl (C)   |
| 486 - 504   | 2167.0735 | 2166.0662 | 2166.0745 | -0.0083 | 0 K.DTVGQYESHIAFTLPGLYR.V                   |
| 505 - 515   | 1225.6534 | 1224.6462 | 1224.6502 | -0.0041 | 0 R.VVHGIDVDFPK.F                           |
| 516 - 537   | 2507.1982 | 2506.1910 | 2506.1838 | 0.0072  | 1 K.FNIVSPGADMSVYFPYTEADKR.L                |
| 516 - 537   | 2523.1770 | 2522.1697 | 2522.1787 | -0.0090 | 1 K.FNIVSPGADMSVYFPYTEADKR.L Oxidation (M)  |
| 538 - 559   | 2642.2705 | 2641.2632 | 2641.2547 | 0.0085  | 0 R.LTAFHPEIEELLYSEVENDEHK.F                |
| 597 - 613   | 1839.8981 | 1838.8908 | 1838.8944 | -0.0036 | 0 R.DLANLVIVCGDHGNSK.D Carbamidomethyl (C)  |
| 614 - 622   | 1151.5328 | 1150.5256 | 1150.5254 | 0.0001  | 1 K.DREEQAEFK.K                             |
| 623 - 632   | 1258.6372 | 1257.6299 | 1257.6427 | -0.0128 | 1 K.KMYGLIDQYK.L                            |
| 624 - 632   | 1130.5684 | 1129.5611 | 1129.5477 | 0.0133  | 0 K.KMYGLIDQYK.L                            |
| 624 - 632   | 1146.5569 | 1145.5496 | 1145.5427 | 0.0069  | 0 K.KMYGLIDQYK.L Oxidation (M)              |
| 639 - 646   | 1005.5211 | 1004.5138 | 1004.4862 | 0.0277  | 0 R.WISQMNR.V                               |
| 639 - 646   | 1021.5137 | 1020.5065 | 1020.4811 | 0.0254  | 0 R.WISQMNR.V Oxidation (M)                 |
| 715 - 725   | 1266.6573 | 1265.6501 | 1265.6655 | -0.0155 | 0 K.AADILVNFPEK.C                           |
| 726 - 743   | 2155.9849 | 2154.9776 | 2154.9752 | 0.0024  | 1 K.CKQDSTYWDNISQGLQR.I Carbamidomethyl (C) |
| 769 - 775   | 880.4605  | 879.4532  | 879.4450  | 0.0082  | 0 K.YVSNLER.R                               |
| 781 - 789   | 1177.5996 | 1176.5923 | 1176.5889 | 0.0035  | 0 R.YIEMFYALK.Y                             |

## Spot 1310

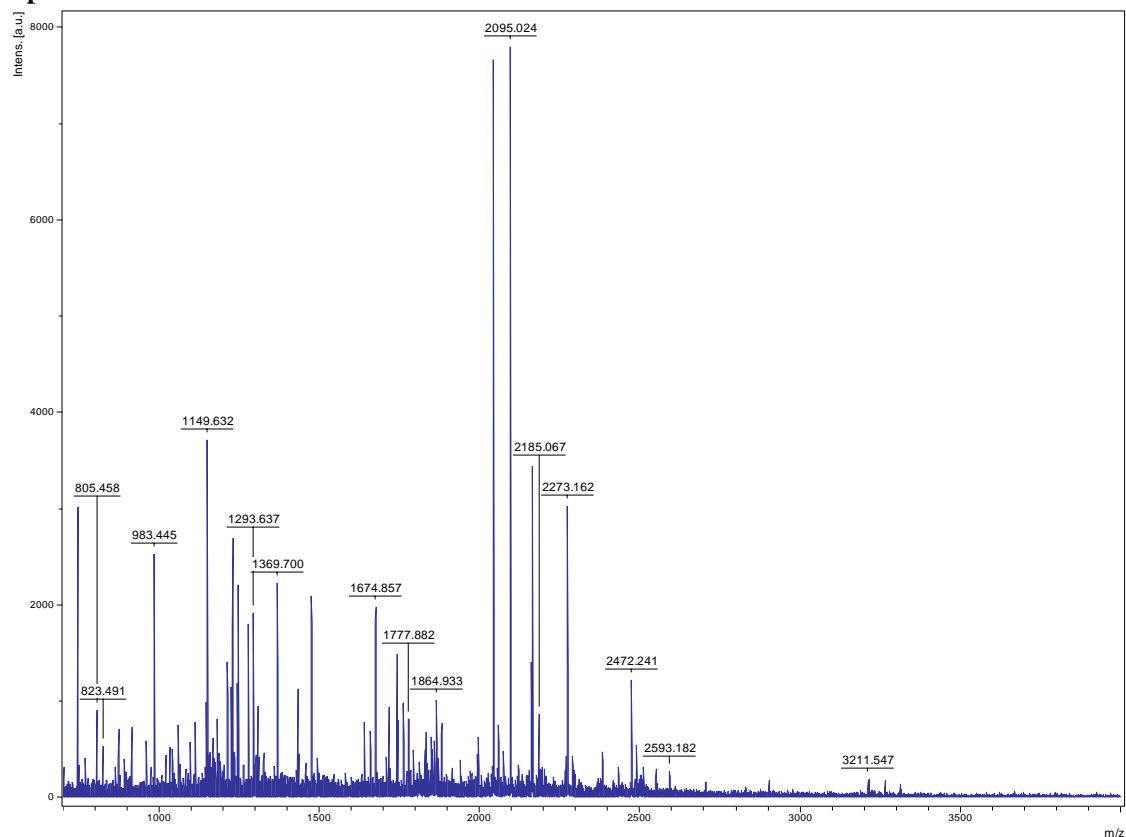

Match to: gi|51090952 Score: 181 Expect: 1.3e-13

### Matched peptides:

| Start - End | Observed  | Mr (expt) | Mr (calc) | Delta   | Miss Sequence                               |
|-------------|-----------|-----------|-----------|---------|---------------------------------------------|
| 51 - 72     | 2472.2410 | 2471.2337 | 2471.2015 | 0.0322  | 0 R.HSDGLPHLNQAEAEATWMGLLPR.R               |
| 51 - 72     | 2488.2148 | 2487.2076 | 2487.1964 | 0.0111  | 0 R.HSDGLPHLNQAEAEATWMGLLPR.R Oxidation (M) |
| 74 - 87     | 1674.8568 | 1673.8495 | 1673.8525 | -0.0030 | 1 R.AGPRDELDWLALYR.S                        |
| 78 - 87     | 1293.6373 | 1292.6301 | 1292.6401 | -0.0100 | 0 R.DELDWLALYR.S                            |
| 92 - 113    | 2095.0237 | 2094.0164 | 2094.0129 | 0.0035  | 0 R.GGGDVGGEPAGFLSPASLHDV.R.V               |
| 141 - 146   | 823.4913  | 822.4841  | 822.4388  | 0.0452  | 0 R.LTWTFR.Q                                |
| 151 - 169   | 2042.0001 | 2040.9928 | 2040.9904 | 0.0024  | 0 K.LPTVGEPEYGGWEAPDQQLR.G                  |
| 199 - 208   | 1224.6259 | 1223.6186 | 1223.6220 | -0.0034 | 0 K.VVDILYSCQK.K Carbamidomethyl (C)        |
| 242 - 257   | 1761.8981 | 1760.8908 | 1760.9131 | -0.0223 | 0 K.IMQGLLDQYTLAGNPK.G                      |
| 242 - 257   | 1777.8816 | 1776.8743 | 1776.9080 | -0.0337 | 0 K.IMQGLLDQYTLAGNPK.G Oxidation (M)        |
| 275 - 284   | 1277.7021 | 1276.6949 | 1276.7139 | -0.0190 | 1 K.KLIQEYSIQR.H                            |
| 276 - 284   | 1149.6324 | 1148.6252 | 1148.6189 | 0.0062  | 0 K.KLIQEYSIQR.H                            |
| 353 - 363   | 1369.7001 | 1368.6928 | 1368.7037 | -0.0109 | 1 K.RYEVVGDQLYK.E                           |
| 354 - 363   | 1213.6138 | 1212.6065 | 1212.6026 | 0.0039  | 0 R.YEVVGDQLYK.E                            |
| 395 - 401   | 872.5528  | 871.5455  | 871.5127  | 0.0328  | 1 K.RLVDEIK.I                               |
| 402 - 416   | 1742.8068 | 1741.7995 | 1741.8192 | -0.0197 | 0 K.ISSNEETCATYNLLK.V Carbamidomethyl (C)   |
| 430 - 436   | 983.4451  | 982.4379  | 982.4144  | 0.0234  | 0 K.YTDHYER.L                               |
| 437 - 447   | 1228.6804 | 1227.6731 | 1227.6757 | -0.0026 | 0 R.LLINGIMGNQR.G                           |
| 437 - 447   | 1244.6782 | 1243.6709 | 1243.6706 | 0.0003  | 0 R.LLINGIMGNQR.G Oxidation (M)             |
| 448 - 464   | 1848.9315 | 1847.9242 | 1847.9425 | -0.0183 | 1 R.GKEPGVMYIFLPMGPGR.S                     |
| 448 - 464   | 1864.9329 | 1863.9256 | 1863.9375 | -0.0119 | 1 R.GKEPGVMYIFLPMGPGR.S Oxidation (M)       |
| 448 - 464   | 1880.9325 | 1879.9252 | 1879.9324 | -0.0072 | 1 R.GKEPGVMYIFLPMGPGR.S 2 Oxidation (M)     |
| 563 - 573   | 1168.6174 | 1167.6102 | 1167.6108 | -0.0007 | 0 K.GDARPANVNVRI                            |
| 574 - 591   | 1857.9474 | 1856.9401 | 1856.9632 | -0.0231 | 0 R.IPSWTSVDGAIATLNGQK.L                    |
| 606 - 615   | 1147.6045 | 1146.5972 | 1146.5921 | 0.0051  | 0 K.LWGGDDTLSLK.F                           |

## Spot 1311

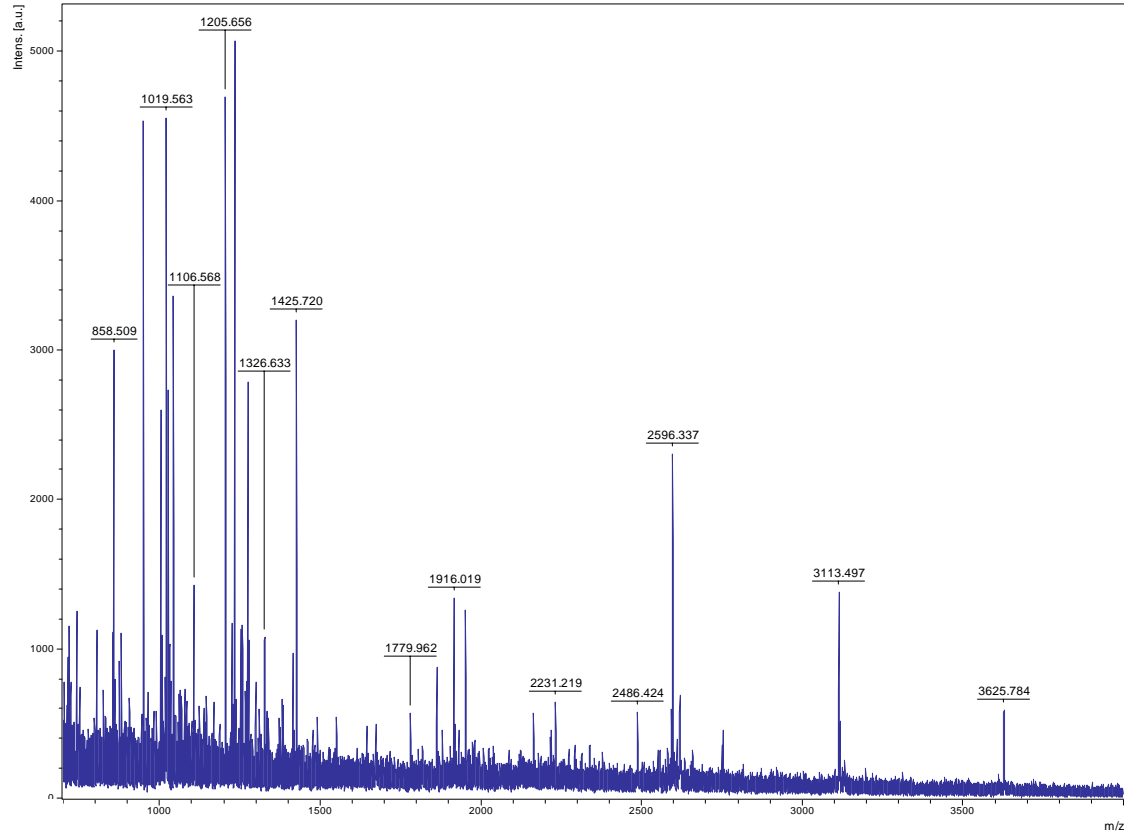

Match to: gi|3915054 Score: 151 Expect: 5.3e-11

### Matched peptides:

| Start - End | Observed  | Mr (expt) | Mr (calc) | Delta   | Miss Sequence                              |
|-------------|-----------|-----------|-----------|---------|--------------------------------------------|
| 1 - 12      | 1334.7058 | 1333.6985 | 1333.6408 | 0.0577  | 1 -.MGETTGERALNR.L                         |
| 20 - 37     | 1915.9126 | 1914.9053 | 1914.9799 | -0.0746 | 0 R.IGDLSAHTNELVAVFSR.L                    |
| 67 - 77     | 1258.7425 | 1257.7352 | 1257.6928 | 0.0424  | 1 K.LKDSALEDVLR.G                          |
| 69 - 77     | 1017.5543 | 1016.5470 | 1016.5138 | 0.0332  | 0 K.DSALEDVLR.G                            |
| 178 - 188   | 1382.7172 | 1381.7099 | 1381.7064 | 0.0036  | 0 K.ESMYPLLNFLR.A                          |
| 194 - 202   | 1068.5146 | 1067.5073 | 1067.4562 | 0.0511  | 0 K.GMTMMLNDR.I                            |
| 205 - 214   | 1043.6232 | 1042.6159 | 1042.5771 | 0.0389  | 0 R.SLDALQGALR.K                           |
| 236 - 243   | 963.5340  | 962.5267  | 962.5072  | 0.0195  | 0 R.FQELGLEK.G                             |
| 236 - 243   | 1005.5305 | 1004.5232 | 1004.5178 | 0.0054  | 0 R.FQELGLEK.G Acetyl (N-term)             |
| 244 - 251   | 949.4139  | 948.4066  | 948.3872  | 0.0194  | 0 K.GWGDCAQR.V Carbamidomethyl (C)         |
| 317 - 325   | 1106.5671 | 1105.5598 | 1105.5260 | 0.0339  | 0 R.AMENEMLLR.I                            |
| 317 - 325   | 1122.6034 | 1121.5961 | 1121.5209 | 0.0752  | 0 R.AMENEMLLR.I Oxidation (M)              |
| 326 - 336   | 1267.7732 | 1266.7659 | 1266.7408 | 0.0251  | 1 R.IKQQLNITPR.I                           |
| 328 - 336   | 1026.6010 | 1025.5937 | 1025.5618 | 0.0320  | 0 K.QQQLNITPR.I                            |
| 337 - 342   | 714.4695  | 713.4622  | 713.4799  | -0.0177 | 0 R.ILVTR.L                                |
| 343 - 355   | 1425.6956 | 1424.6883 | 1424.6830 | 0.0053  | 0 R.LLPDAHGTTCGQR.L Carbamidomethyl (C)    |
| 359 - 369   | 1275.7472 | 1274.7399 | 1274.7095 | 0.0304  | 0 K.VLGTHTHLR.V                            |
| 432 - 445   | 1549.8078 | 1548.8005 | 1548.8082 | -0.0077 | 0 K.LGVTHCTIAHALEK.T Carbamidomethyl (C)   |
| 446 - 456   | 1414.7253 | 1413.7180 | 1413.6928 | 0.0252  | 1 K.TKYPNSDLYWK.K                          |
| 513 - 523   | 1225.6754 | 1224.6681 | 1224.6502 | 0.0179  | 0 R.VVHGIDVFDPK.F                          |
| 575 - 583   | 1062.6375 | 1061.6302 | 1061.6055 | 0.0247  | 0 K.KPIIFSMAR.L                            |
| 575 - 583   | 1078.6322 | 1077.6249 | 1077.6004 | 0.0245  | 0 K.KPIIFSMAR.L Oxidation (M)              |
| 603 - 618   | 1779.9033 | 1778.8960 | 1778.9348 | -0.0388 | 0 R.LQELVNLVVVCGDHGK.E Carbamidomethyl (C) |
| 657 - 662   | 751.3552  | 750.3479  | 750.3660  | -0.0181 | 0 R.NGELYR.Y                               |
| 663 - 668   | 857.3678  | 856.3605  | 856.3571  | 0.0034  | 0 R.YICDMR.G Carbamidomethyl (C)           |
| 723 - 733   | 1253.6933 | 1252.6860 | 1252.6703 | 0.0158  | 0 K.ASALLVEFFEK.C                          |
| 734 - 743   | 1326.6164 | 1325.6091 | 1325.5823 | 0.0269  | 0 K.CQEDPNHWIK.I Carbamidomethyl (C)       |
| 788 - 797   | 1299.7359 | 1298.7286 | 1298.7056 | 0.0230  | 1 R.RYLEMLYALK.Y                           |

### Spot 1319

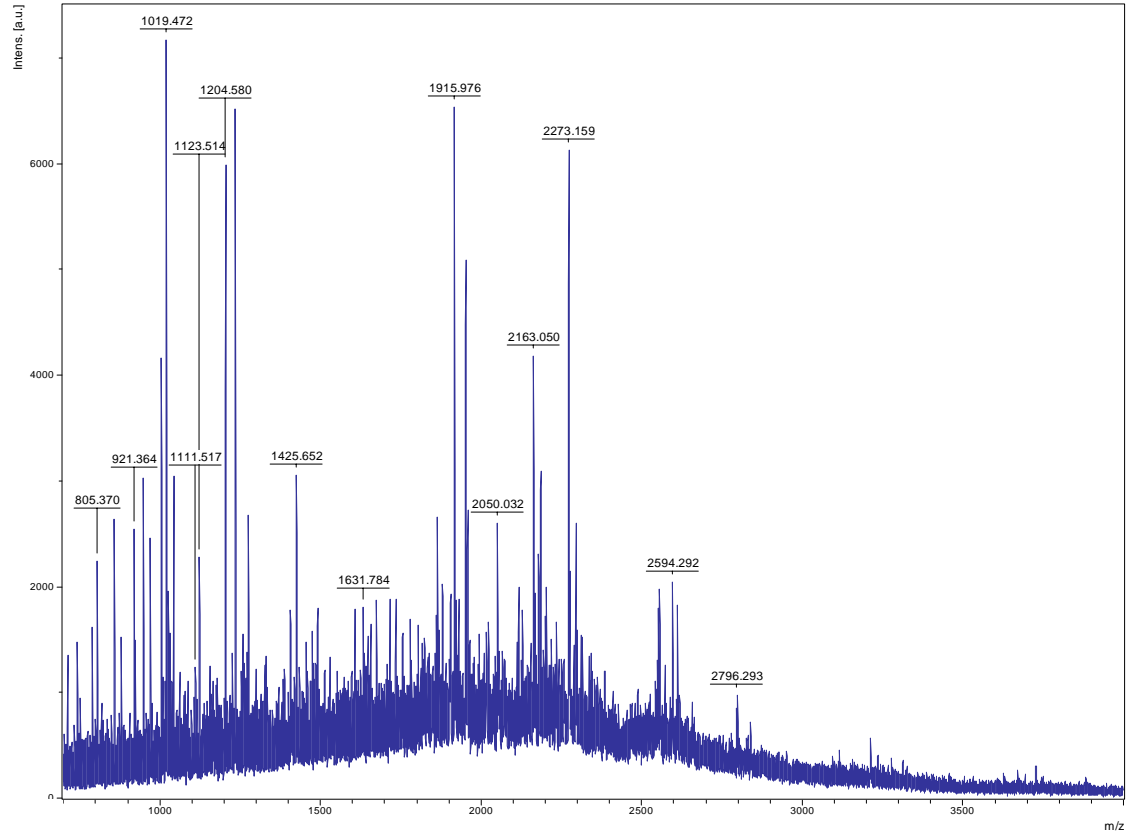

Match to: gi|3915054 Score: 109 Expect: 8.4e-07

| Start - End | Observed  | Mr (expt) | Mr (calc) | Delta   | Miss Sequence                             |
|-------------|-----------|-----------|-----------|---------|-------------------------------------------|
| 20 - 37     | 1916.0162 | 1915.0089 | 1914.9799 | 0.0290  | 0 R.IGDSLSAHTNELVAVFSR.L                  |
| 20 - 43     | 2555.5048 | 2554.4975 | 2554.3502 | 0.1473  | 1 R.IGDSLSAHTNELVAVFSRLVNQKG.G            |
| 44 - 66     | 2594.3115 | 2593.3042 | 2593.2958 | 0.0084  | 1 K.GMLQPHQIAEYNAIPEGEREK.L               |
| 44 - 66     | 2610.2812 | 2609.2739 | 2609.2907 | -0.0168 | 1 K.GMLQPHQIAEYNAIPEGEREK.L Oxidation (M) |
| 157 - 167   | 1204.6285 | 1203.6212 | 1203.6360 | -0.0147 | 0 K.SIGNGVQFLNR.H                         |
| 205 - 214   | 1043.5485 | 1042.5412 | 1042.5771 | -0.0358 | 0 R.SLDALQGLR.K                           |
| 219 - 235   | 1951.9900 | 1950.9827 | 1950.9336 | 0.0491  | 0 K.HLAGITADTPYSEFHHR.F                   |
| 343 - 355   | 1425.7122 | 1424.7049 | 1424.6830 | 0.0219  | 0 R.LLPDAGTTCGQR.L Carbamidomethyl (C)    |
| 359 - 369   | 1275.7083 | 1274.7010 | 1274.7095 | -0.0085 | 0 K.VLGTEHTHLR.V                          |
| 524 - 545   | 2550.2335 | 2549.2262 | 2549.2260 | 0.0002  | 1 K.FNIVSPGADMSIYFPFESQKR.L Oxidation (M) |
| 622 - 630   | 1123.5294 | 1122.5221 | 1122.5193 | 0.0029  | 1 K.DKEEQAEFK.K                           |
| 647 - 654   | 1005.4563 | 1004.4490 | 1004.4862 | -0.0371 | 0 R.WISQMNR.V                             |
| 760 - 776   | 2050.0629 | 2049.0556 | 2049.0393 | 0.0163  | 1 K.LYSERLMTLSGVYGFWK.Y                   |



Spot 1322

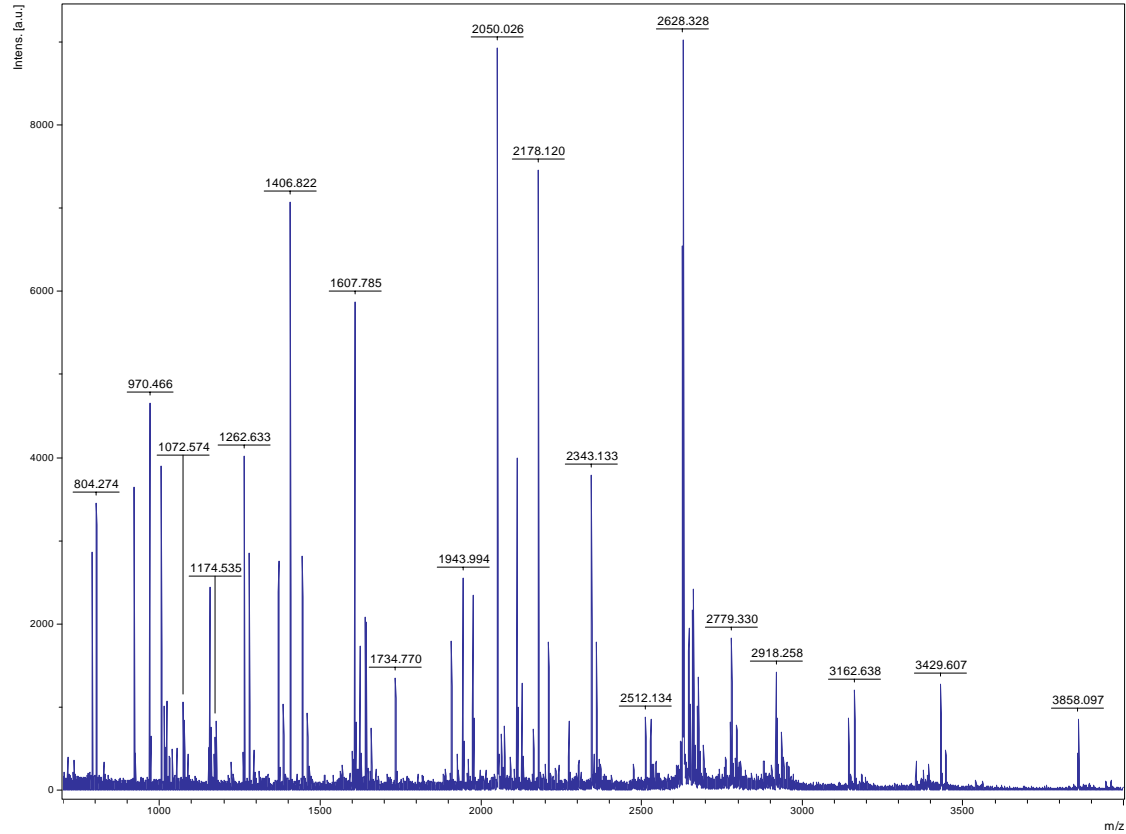

Match to: gi|50878307; Score: 421

Matched peptides:

| Start - End | Observed | Mr (expt) | Mr (calc) | Delta | Miss Sequence                                   |
|-------------|----------|-----------|-----------|-------|-------------------------------------------------|
| 156 - 168   | 1406.82  | 1405.82   | 1405.84   | -0.02 | 0 LGDPARPLLSVR                                  |
| 203 - 209   | 921.41   | 920.41    | 920.40    | 0.01  | 0 FAYDSYR                                       |
| 203 - 210   | 1077.50  | 1076.50   | 1076.50   | -0.00 | 1 FAYDSYR                                       |
| 211 - 230   | 2352.08  | 2351.08   | 2351.13   | -0.05 | 0 FLDMFGNVVMDIPHALFEK                           |
| 211 - 230   | 2368.12  | 2367.11   | 2367.13   | -0.01 | 0 FLDMFGNVVMDIPHALFEK Oxidation (M)             |
| 276 - 293   | 2072.05  | 2071.05   | 2071.12   | -0.07 | 1 KQLQLAVLAVFNSWDSFR                            |
| 277 - 293   | 1943.99  | 1942.99   | 1943.03   | -0.04 | 0 QLQLAVLAVFNSWDSFR                             |
| 308 - 333   | 2659.26  | 2658.26   | 2658.29   | -0.03 | 0 GTAVNVQTMVFGNMGNTSGTGVLFTR                    |
| 308 - 333   | 2675.28  | 2674.27   | 2674.28   | -0.01 | 0 GTAVNVQTMVFGNMGNTSGTGVLFTR Oxidation (M)      |
| 341 - 360   | 2178.12  | 2177.12   | 2177.15   | -0.03 | 1 KLYGEFLVNAQGEDVVAGIR                          |
| 342 - 360   | 2050.03  | 2049.02   | 2049.05   | -0.03 | 0 LYGEFLVNAQGEDVVAGIR                           |
| 361 - 384   | 2918.26  | 2917.26   | 2917.26   | -0.00 | 1 TPEDLDAMRDHMPPEYELVENCK                       |
| 361 - 384   | 2934.25  | 2933.25   | 2933.25   | -0.01 | 1 TPEDLDAMRDHMPPEYELVENCK Oxidation (M)         |
| 385 - 404   | 2512.13  | 2511.13   | 2511.18   | -0.05 | 1 ILESHYKEMMDIEFTVQENR                          |
| 385 - 404   | 2528.14  | 2527.14   | 2527.17   | -0.04 | 1 ILESHYKEMMDIEFTVQENR Oxidation (M)            |
| 392 - 404   | 1641.70  | 1640.70   | 1640.72   | -0.02 | 0 EMMDIEFTVQENR                                 |
| 405 - 411   | 1006.49  | 1005.49   | 1005.49   | -0.00 | 0 LWMLQCR                                       |
| 405 - 411   | 1022.48  | 1021.48   | 1021.48   | -0.00 | 0 LWMLQCR Oxidation (M)                         |
| 423 - 435   | 1444.73  | 1443.73   | 1443.74   | -0.01 | 0 IAVDMVNEGLVER                                 |
| 423 - 435   | 1460.71  | 1459.71   | 1459.73   | -0.03 | 0 IAVDMVNEGLVER Oxidation (M)                   |
| 441 - 464   | 2779.33  | 2778.33   | 2778.34   | -0.02 | 1 MVEPGHLDQLLHPQFENPSGYKDK                      |
| 441 - 464   | 2795.33  | 2794.33   | 2794.34   | -0.01 | 1 MVEPGHLDQLLHPQFENPSGYKDK Oxidation (M)        |
| 465 - 496   | 3162.64  | 3161.64   | 3161.61   | 0.02  | 0 VIATGLPASPGAAGVQIVFTAEDAEEAWHAQGK             |
| 465 - 502   | 3858.10  | 3857.10   | 3857.05   | 0.05  | 1 VIATGLPASPGAAGVQIVFTAEDAEEAWHAQGDVILVR        |
| 503 - 523   | 2112.01  | 2111.00   | 2111.03   | -0.03 | 0 TETSPEDVGGMHAAVGILTAR                         |
| 503 - 523   | 2127.99  | 2126.99   | 2127.03   | -0.04 | 0 TETSPEDVGGMHAAVGILTAR Oxidation (M)           |
| 524 - 539   | 1600.82  | 1599.81   | 1599.79   | 0.02  | 1 GGMTSHAAVARGWGK Oxidation (M)                 |
| 540 - 549   | 1171.44  | 1170.44   | 1170.46   | -0.02 | 0 CCVSGCSSVR                                    |
| 563 - 583   | 2210.11  | 2209.10   | 2209.14   | -0.03 | 0 ALHEGEWLSLNGSTGEVIHGK                         |
| 584 - 606   | 2647.22  | 2646.22   | 2646.25   | -0.03 | 0 QPLCPPALSGDLETFMSWVDEVK                       |
| 584 - 606   | 2663.23  | 2662.23   | 2662.24   | -0.01 | 0 QPLCPPALSGDLETFMSWVDEVK Oxidation (M)         |
| 584 - 607   | 2775.31  | 2774.31   | 2774.34   | -0.03 | 1 QPLCPPALSGDLETFMSWVDEVK                       |
| 625 - 635   | 1174.53  | 1173.53   | 1173.56   | -0.02 | 0 QNGAEGIGLCR                                   |
| 636 - 646   | 1369.57  | 1368.57   | 1368.58   | -0.01 | 0 TEHMFASDER                                    |
| 636 - 646   | 1385.56  | 1384.55   | 1384.57   | -0.02 | 0 TEHMFASDER Oxidation (M)                      |
| 652 - 662   | 1261.60  | 1260.60   | 1260.62   | -0.02 | 0 QMIMASSLELR Pyro-glu (N-term Q)               |
| 652 - 662   | 1294.62  | 1293.62   | 1293.64   | -0.02 | 0 QMIMASSLELR Oxidation (M)                     |
| 675 - 682   | 970.47   | 969.46    | 969.46    | 0.01  | 0 SDFEGIFR                                      |
| 683 - 692   | 1072.57  | 1071.57   | 1071.57   | -0.00 | 0 AMDGLPVTIR                                    |
| 683 - 692   | 1088.56  | 1087.56   | 1087.57   | -0.01 | 0 AMDGLPVTIR Oxidation (M)                      |
| 693 - 712   | 2343.13  | 2342.13   | 2342.17   | -0.04 | 0 LLDPPLEHFLPEGHVEDMVR                          |
| 693 - 712   | 2359.14  | 2358.14   | 2358.17   | -0.03 | 0 LLDPPLEHFLPEGHVEDMVR Oxidation (M)            |
| 713 - 728   | 1734.77  | 1733.77   | 1733.79   | -0.02 | 0 ELCSETGAAQDDVLR                               |
| 732 - 742   | 1262.63  | 1261.63   | 1261.65   | -0.02 | 0 LSEVNPMLGFR                                   |
| 732 - 742   | 1278.64  | 1277.63   | 1277.64   | -0.01 | 0 LSEVNPMLGFR Oxidation (M)                     |
| 746 - 759   | 1607.78  | 1606.78   | 1606.80   | -0.02 | 0 LGISYPELTEMQAR                                |
| 746 - 759   | 1623.78  | 1622.77   | 1622.80   | -0.02 | 0 LGISYPELTEMQAR Oxidation (M)                  |
| 816 - 824   | 1015.55  | 1014.54   | 1014.55   | -0.01 | 0 VGTMIIEIPR                                    |
| 825 - 855   | 3429.61  | 3428.60   | 3428.59   | 0.02  | 0 AALVADEIAEQAEFFSFGTNDLTQMTFGYSR               |
| 825 - 855   | 3445.61  | 3444.61   | 3444.58   | 0.03  | 0 AALVADEIAEQAEFFSFGTNDLTQMTFGYSR Oxidation (M) |
| 856 - 882   | 3142.60  | 3141.60   | 3141.61   | -0.01 | 1 DDVGKFLPIYLSQGLQHPDFEVLDR                     |
| 861 - 882   | 2628.33  | 2627.33   | 2627.37   | -0.05 | 0 FLPIYLSQGLQHPDFEVLDR                          |
| 904 - 922   | 1974.95  | 1973.95   | 1973.97   | -0.02 | 0 VGCGEHGGELSVAFFAK                             |
| 923 - 934   | 1371.61  | 1370.61   | 1370.63   | -0.02 | 0 AGLDYVSCSPFR                                  |
| 923 - 939   | 1907.95  | 1906.94   | 1906.97   | -0.03 | 1 AGLDYVSCSPFRVPIAR                             |

# Spot 1324

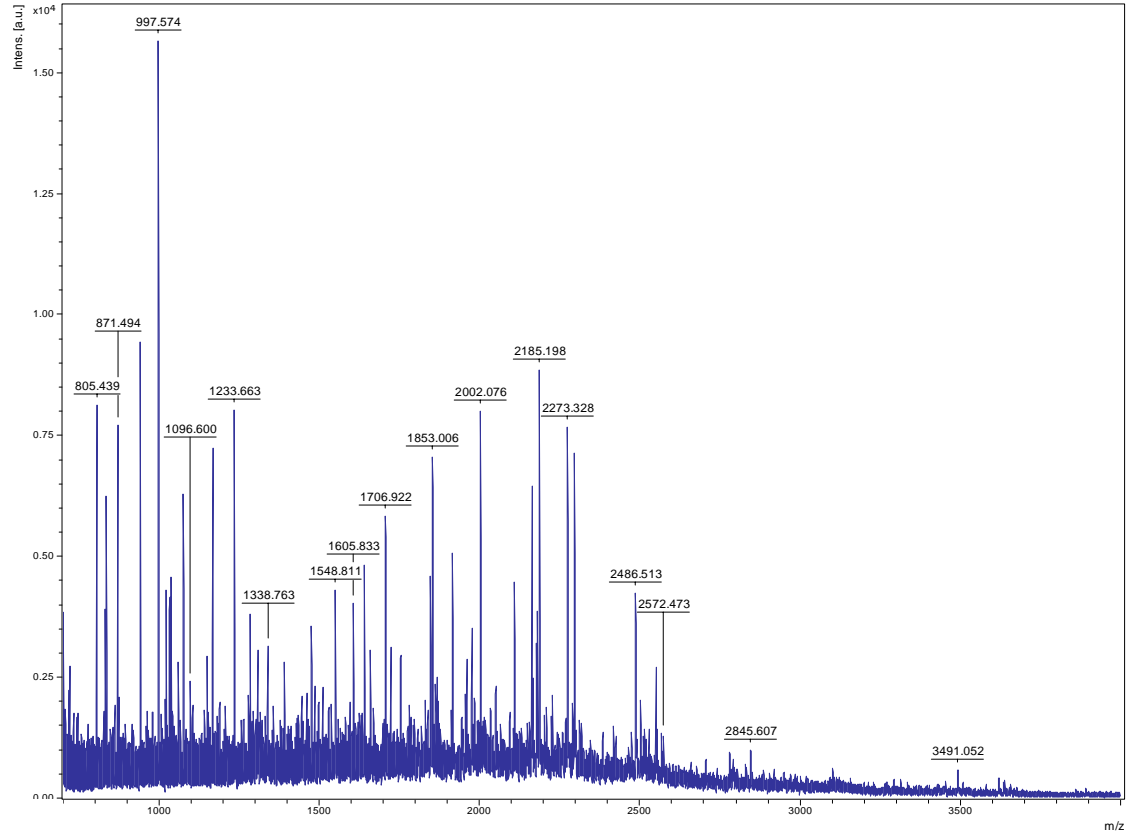

Match to: *gj*|14091865; Score: 121

| Start - End | Observed | Mr (expt) | Mr (calc) | Delta | Miss Sequence                              |
|-------------|----------|-----------|-----------|-------|--------------------------------------------|
| 61 - 67     | 979.50   | 978.50    | 978.43    | 0.06  | 1 WRESMDR                                  |
| 88 - 94     | 871.49   | 870.49    | 870.46    | 0.03  | 0 VLYYTGR                                  |
| 95 - 102    | 1032.58  | 1031.58   | 1031.55   | 0.03  | 0 IHEIHEVR                                 |
| 159 - 182   | 2486.51  | 2485.51   | 2485.32   | 0.19  | 0 VLDGAILVLCVGGVQSQSTITVDR                 |
| 186 - 191   | 833.48   | 832.48    | 832.46    | 0.02  | 1 RYEIPR                                   |
| 192 - 200   | 1075.66  | 1074.66   | 1074.62   | 0.04  | 1 VAFINKLDR                                |
| 198 - 207   | 1188.62  | 1187.62   | 1187.58   | 0.04  | 1 LDRMGADPWK                               |
| 198 - 207   | 1204.62  | 1203.62   | 1203.57   | 0.05  | 1 LDRMGADPWK Oxidation (M)                 |
| 201 - 207   | 804.33   | 803.33    | 803.36    | -0.04 | 0 MGADPWK                                  |
| 372 - 393   | 2294.42  | 2293.42   | 2293.30   | 0.12  | 1 VLLAGTPAEPLVALAFKLEEGR                   |
| 394 - 401   | 997.57   | 996.57    | 996.54    | 0.03  | 0 FGQTTYLR                                 |
| 402 - 408   | 835.50   | 834.50    | 834.46    | 0.04  | 0 IYDGVIR                                  |
| 402 - 409   | 963.62   | 962.62    | 962.55    | 0.06  | 1 IYDGVIRK                                 |
| 501 - 509   | 1167.61  | 1166.61   | 1166.57   | 0.04  | 1 FQKEDPTFR                                |
| 510 - 535   | 2845.61  | 2844.61   | 2844.39   | 0.22  | 0 VGLDPESGETIISGMGELHLDIYVER Oxidation (M) |
| 570 - 579   | 1037.51  | 1036.51   | 1036.47   | 0.04  | 0 QSGGQGYGR                                |
| 617 - 636   | 2185.20  | 2184.20   | 2184.07   | 0.12  | 1 GFKEACNSGSLGHVPVENIR                     |
| 620 - 636   | 1853.01  | 1852.00   | 1851.89   | 0.11  | 0 EACNSGSLGHVPVENIR                        |
| 637 - 655   | 1960.10  | 1959.10   | 1958.99   | 0.10  | 0 IVLTDGASHAVDSSELAFK                      |
| 656 - 663   | 940.55   | 939.55    | 939.52    | 0.03  | 0 LASIYAFR                                 |
| 664 - 679   | 1829.02  | 1828.01   | 1827.94   | 0.08  | 0 QCYAAARPVILEPVMK Pyro-glu (N-term Q)     |
| 664 - 679   | 1846.06  | 1845.05   | 1844.96   | 0.09  | 0 QCYAAARPVILEPVMK                         |
| 664 - 679   | 1862.08  | 1861.08   | 1860.96   | 0.12  | 0 QCYAAARPVILEPVMK Oxidation (M)           |
| 684 - 699   | 1779.97  | 1778.96   | 1778.86   | 0.10  | 1 VPTEFQGTVTGDMNKR                         |

## Spot 1327

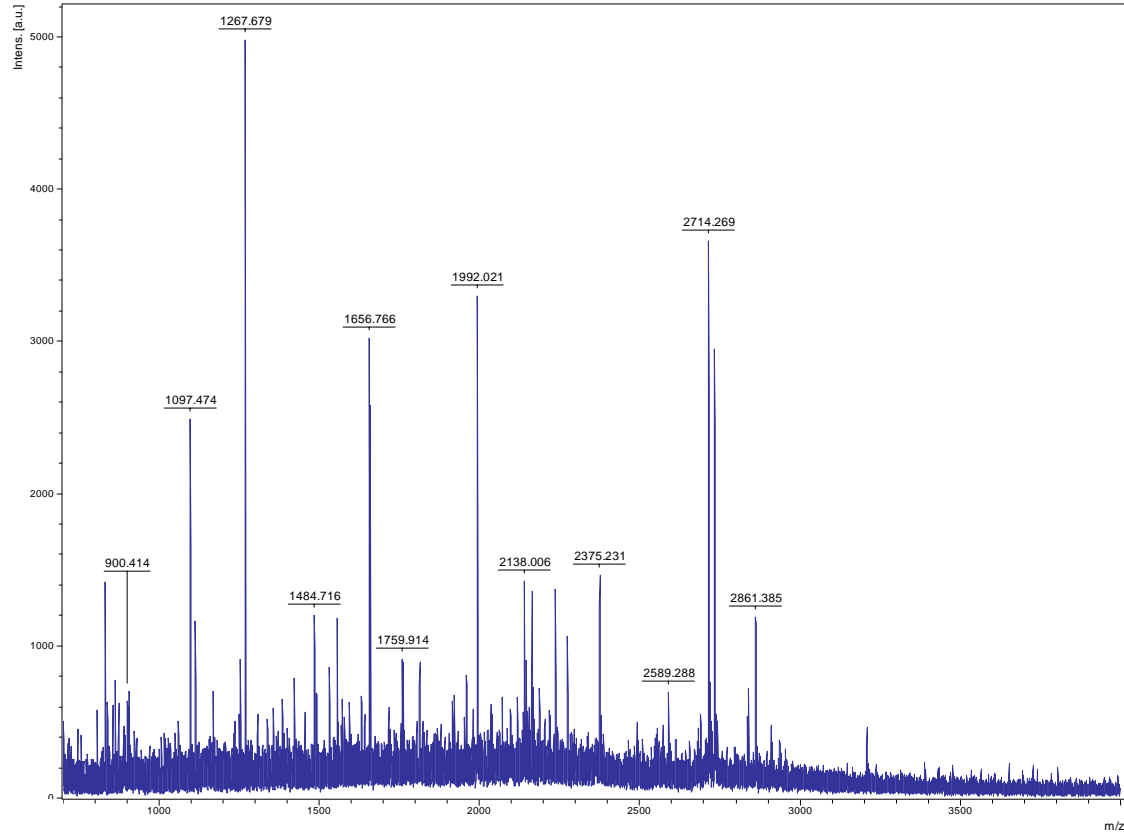

Match to: gi|50947075 Score: 108 Expect: 1.1e-06

### Matched peptides:

| Start - End | Observed  | Mr (expt) | Mr (calc) | Delta   | Miss Sequence                             |
|-------------|-----------|-----------|-----------|---------|-------------------------------------------|
| 69 - 86     | 2144.9679 | 2143.9606 | 2143.9545 | 0.0061  | 1 K.AEETAEEEEKFEYQAEVSR.L                 |
| 105 - 118   | 1530.8297 | 1529.8224 | 1529.8049 | 0.0175  | 1 R.ELVSNASDALDKLR.F                      |
| 119 - 137   | 1992.0611 | 1991.0538 | 1991.0211 | 0.0328  | 0 R.FLGVTDSSLLADGGLEIR.I                  |
| 249 - 269   | 2375.2077 | 2374.2004 | 2374.2280 | -0.0276 | 1 R.GTQITLVLRPDDKFEFADPGR.I               |
| 324 - 339   | 2138.0311 | 2137.0238 | 2137.0091 | 0.0147  | 0 K.YWDWELANETKPIWMR.S                    |
| 324 - 342   | 2492.1543 | 2491.1470 | 2491.1994 | -0.0524 | 1 K.YWDWELANETKPIWMRSPK.E Acetyl (N-term) |
| 340 - 346   | 830.5155  | 829.5082  | 829.4545  | 0.0537  | 1 R.SPKEIEK.T                             |
| 355 - 378   | 2861.2877 | 2860.2804 | 2860.3707 | -0.0903 | 1 K.KAFNEFLDPLAYTHFTTEGEVEFR.S            |
| 356 - 378   | 2733.2252 | 2732.2179 | 2732.2758 | -0.0578 | 0 K.AFNEFLDPLAYTHFTTEGEVEFR.S             |
| 408 - 422   | 1812.9298 | 1811.9225 | 1811.8842 | 0.0383  | 1 K.RVFISDDFDGELFPR.Y                     |
| 409 - 422   | 1656.8324 | 1655.8251 | 1655.7831 | 0.0420  | 0 R.VFISDDFDGELFPR.Y                      |
| 429 - 442   | 1484.8027 | 1483.7954 | 1483.7630 | 0.0324  | 0 K.GVVDSDNLDPLNVS.R                      |
| 488 - 501   | 1631.8370 | 1630.8297 | 1630.8137 | 0.0160  | 1 K.FIKLGCIEDTGNHK.R Carbamidomethyl (C)  |
| 491 - 502   | 1384.7555 | 1383.7482 | 1383.6564 | 0.0918  | 1 K.LGCIEDTGNHK.R Acetyl (N-term)         |
| 645 - 653   | 1097.5594 | 1096.5521 | 1096.4760 | 0.0762  | 0 K.FGWSANMER.L                           |
| 645 - 653   | 1113.5667 | 1112.5594 | 1112.4709 | 0.0885  | 0 K.FGWSANMER.L Oxidation (M)             |
| 657 - 670   | 1555.7703 | 1554.7630 | 1554.7348 | 0.0283  | 0 K.AQTLGDTSSLEFMR.G                      |
| 657 - 670   | 1571.7680 | 1570.7607 | 1570.7297 | 0.0310  | 0 K.AQTLGDTSSLEFMR.G Oxidation (M)        |
| 674 - 685   | 1421.8128 | 1420.8055 | 1420.7714 | 0.0341  | 0 R.IFEINPDHPIVK.D                        |

### Spot 1329

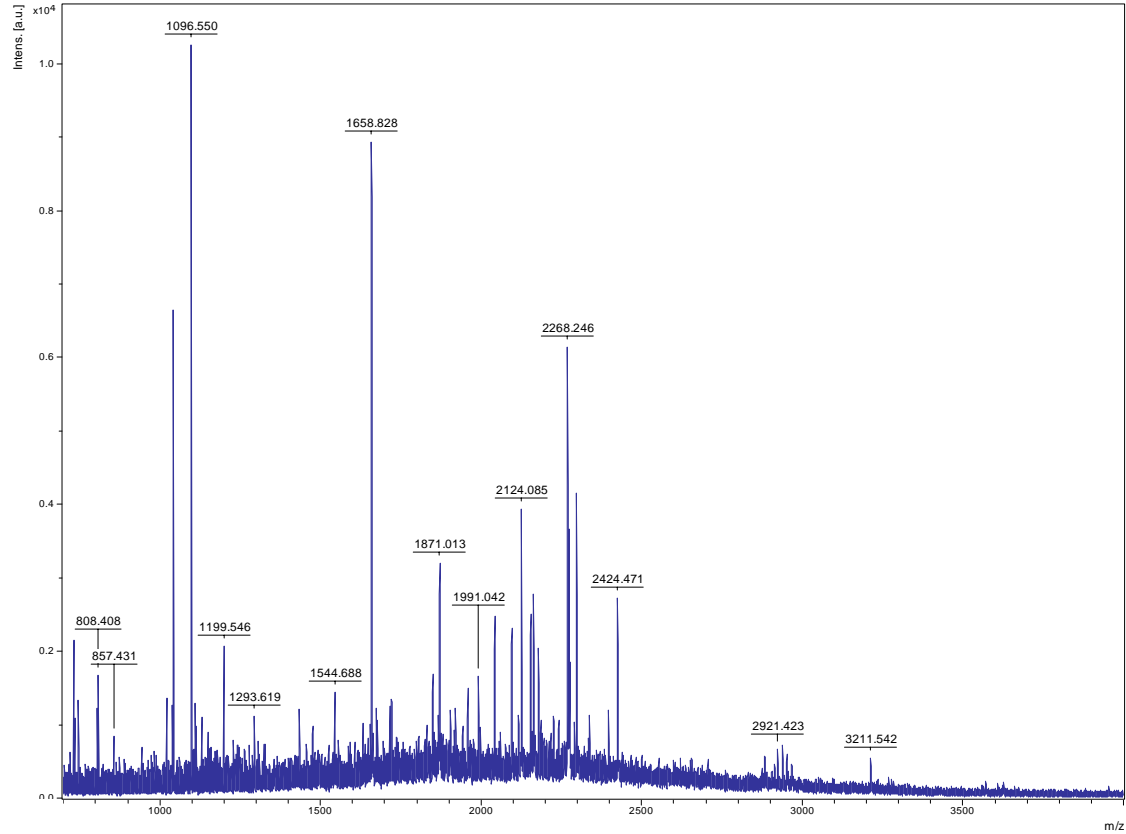

Match to: gi|77556631 Score: 113 Expect: 3.4e-07

Matched peptides:

| Start - End | Observed  | Mr (expt) | Mr (calc) | Delta   | Miss Sequence               |
|-------------|-----------|-----------|-----------|---------|-----------------------------|
| 19 - 28     | 1199.5044 | 1198.4971 | 1198.5658 | -0.0687 | 0 K.FALESFWDGK.S            |
| 112 - 129   | 2178.0287 | 2177.0214 | 2177.0581 | -0.0367 | 0 K.WFDNTYHFIVPELGPNTK.F    |
| 254 - 270   | 1870.9858 | 1869.9785 | 1869.9836 | -0.0051 | 0 K.TLTLNSVTAYGFDLIR.G      |
| 288 - 297   | 1096.5045 | 1095.4972 | 1095.5712 | -0.0740 | 0 K.YLFAGVVDGR.N            |
| 350 - 358   | 1021.4544 | 1020.4471 | 1020.5392 | -0.0921 | 0 K.SWLAFAAQK.V             |
| 368 - 388   | 2124.0396 | 2123.0323 | 2123.0395 | -0.0072 | 1 K.ALAGQKDEYFAANAAAQASR.R  |
| 427 - 448   | 2424.3936 | 2423.3863 | 2423.3787 | 0.0076  | 1 K.KLNLVPLPTTTIGSFPTVELR.R |
| 428 - 448   | 2296.2966 | 2295.2893 | 2295.2838 | 0.0055  | 0 K.LNLVPLPTTTIGSFPTVELR.R  |
| 478 - 494   | 1991.0225 | 1990.0152 | 1990.0007 | 0.0146  | 0 K.IQEELDIDLVLHGEPER.N     |
| 591 - 611   | 2268.1895 | 2267.1822 | 2267.1644 | 0.0178  | 0 K.EVELEAGGIQIQIDEAALR.E   |
| 619 - 633   | 1848.8378 | 1847.8305 | 1847.8743 | -0.0438 | 0 K.AEHAFYLDWAVHSFR.I       |
| 690 - 705   | 1658.7868 | 1657.7795 | 1657.8212 | -0.0417 | 0 K.YGAGIGPGVYDIHSPI        |

## Spot 1331

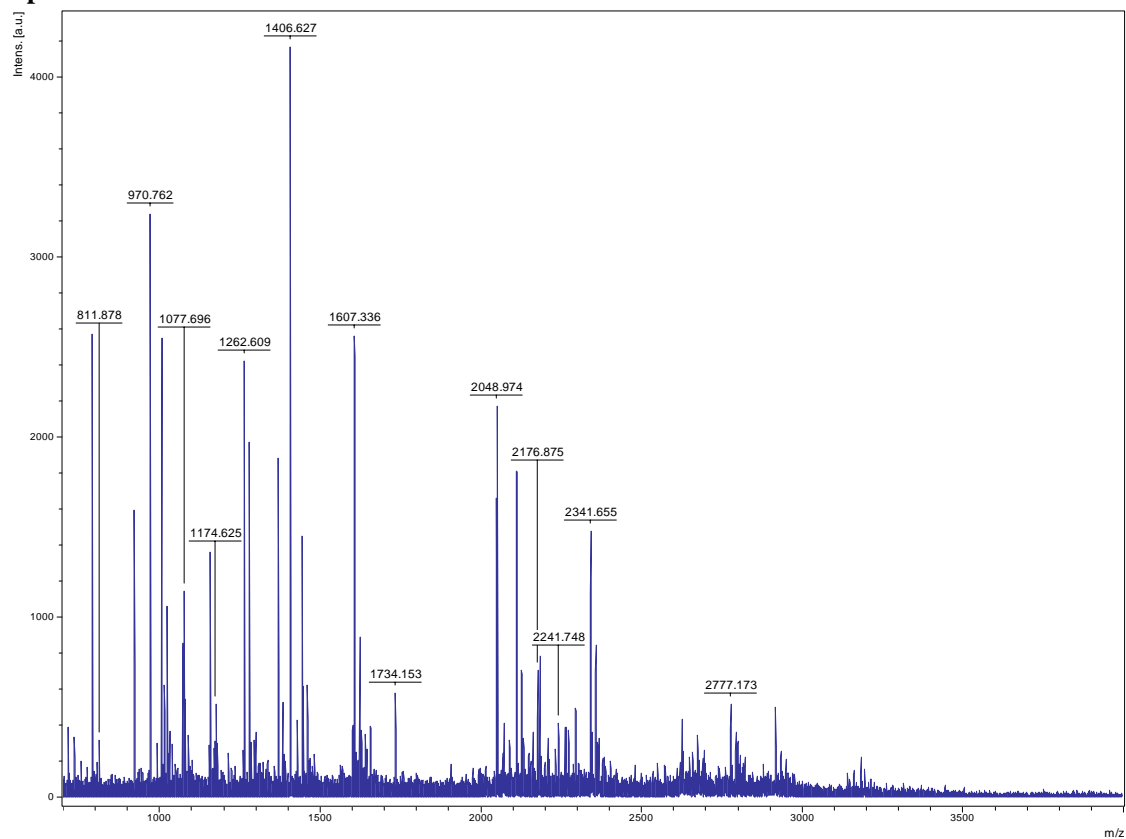

Match to: gi|50878307 Score: 160 Expect: 7.1e-12

### Matched peptides:

| Start - End | Observed  | Mr (expt) | Mr (calc) | Delta   | Miss Sequence                                |
|-------------|-----------|-----------|-----------|---------|----------------------------------------------|
| 40 - 48     | 1006.5109 | 1005.5036 | 1005.5719 | -0.0683 | 0 R.HGKPEVAIR.S                              |
| 156 - 168   | 1406.9474 | 1405.9401 | 1405.8405 | 0.0996  | 0 R.LGDPARPLLLSVR.S                          |
| 203 - 209   | 921.3823  | 920.3750  | 920.4028  | -0.0278 | 0 R.FAYDSYR.R                                |
| 203 - 210   | 1077.5439 | 1076.5366 | 1076.5039 | 0.0327  | 1 R.FAYDSYRR.F                               |
| 341 - 360   | 2178.1897 | 2177.1824 | 2177.1479 | 0.0345  | 1 K.KLYGEFLVNAQGEDVVAGIR.T                   |
| 342 - 360   | 2050.1268 | 2049.1195 | 2049.0530 | 0.0665  | 0 K.LYGEFLVNAQGEDVVAGIR.T                    |
| 423 - 435   | 1444.8328 | 1443.8255 | 1443.7391 | 0.0864  | 0 K.IAVDMVNEGLVER.R                          |
| 423 - 435   | 1460.8343 | 1459.8270 | 1459.7340 | 0.0930  | 0 K.IAVDMVNEGLVER.R Oxidation (M)            |
| 423 - 436   | 1600.9215 | 1599.9142 | 1599.8402 | 0.0740  | 1 K.IAVDMVNEGLVERR.T                         |
| 441 - 464   | 2779.2978 | 2778.2905 | 2778.3435 | -0.0530 | 1 K.MVEPGHLDQLLHPQFENPSGYKDK.V               |
| 441 - 464   | 2795.2764 | 2794.2691 | 2794.3384 | -0.0693 | 1 K.MVEPGHLDQLLHPQFENPSGYKDK.V Oxidation (M) |
| 503 - 523   | 2112.0820 | 2111.0747 | 2111.0316 | 0.0431  | 0 R.TETSPEDVGGMHAAVGLTAR.G                   |
| 503 - 523   | 2128.0735 | 2127.0662 | 2127.0266 | 0.0397  | 0 R.TETSPEDVGGMHAAVGLTAR.G Oxidation (M)     |
| 636 - 646   | 1369.6697 | 1368.6624 | 1368.5768 | 0.0856  | 0 R.TEHMFFASDER.I                            |
| 636 - 646   | 1385.6685 | 1384.6612 | 1384.5717 | 0.0895  | 0 R.TEHMFFASDER.I Oxidation (M)              |
| 652 - 662   | 1278.7340 | 1277.7267 | 1277.6471 | 0.0796  | 0 R.QMIMASSLELR.Q                            |
| 669 - 674   | 789.3599  | 788.3526  | 788.4545  | -0.1018 | 0 R.LLPYQR.S                                 |
| 675 - 682   | 970.4547  | 969.4474  | 969.4556  | -0.0081 | 0 R.SDFEGIFR.A                               |
| 683 - 692   | 1072.6100 | 1071.6027 | 1071.5746 | 0.0281  | 0 R.AMDGLPVTIR.L                             |
| 683 - 692   | 1088.6039 | 1087.5966 | 1087.5695 | 0.0271  | 0 R.AMDGLPVTIR.L Oxidation (M)               |
| 693 - 712   | 2343.1998 | 2342.1925 | 2342.1728 | 0.0197  | 0 R.LLDPPLHEFLPEGHVEDMVR.E                   |
| 693 - 712   | 2359.1730 | 2358.1657 | 2358.1678 | -0.0020 | 0 R.LLDPPLHEFLPEGHVEDMVR.E Oxidation (M)     |
| 732 - 742   | 1262.7150 | 1261.7077 | 1261.6488 | 0.0589  | 0 K.LSEVNPMLGFR.G                            |
| 746 - 759   | 1607.9010 | 1606.8937 | 1606.8024 | 0.0913  | 0 R.LGISYPELTEMQAR.A                         |
| 816 - 824   | 1015.5591 | 1014.5518 | 1014.5532 | -0.0013 | 0 K.VGTMIEIPR.A                              |
| 861 - 882   | 2628.3226 | 2627.3153 | 2627.3747 | -0.0594 | 0 K.FLPIYLSQGLQHDPPEVLDR.Q                   |

### Spot 1341

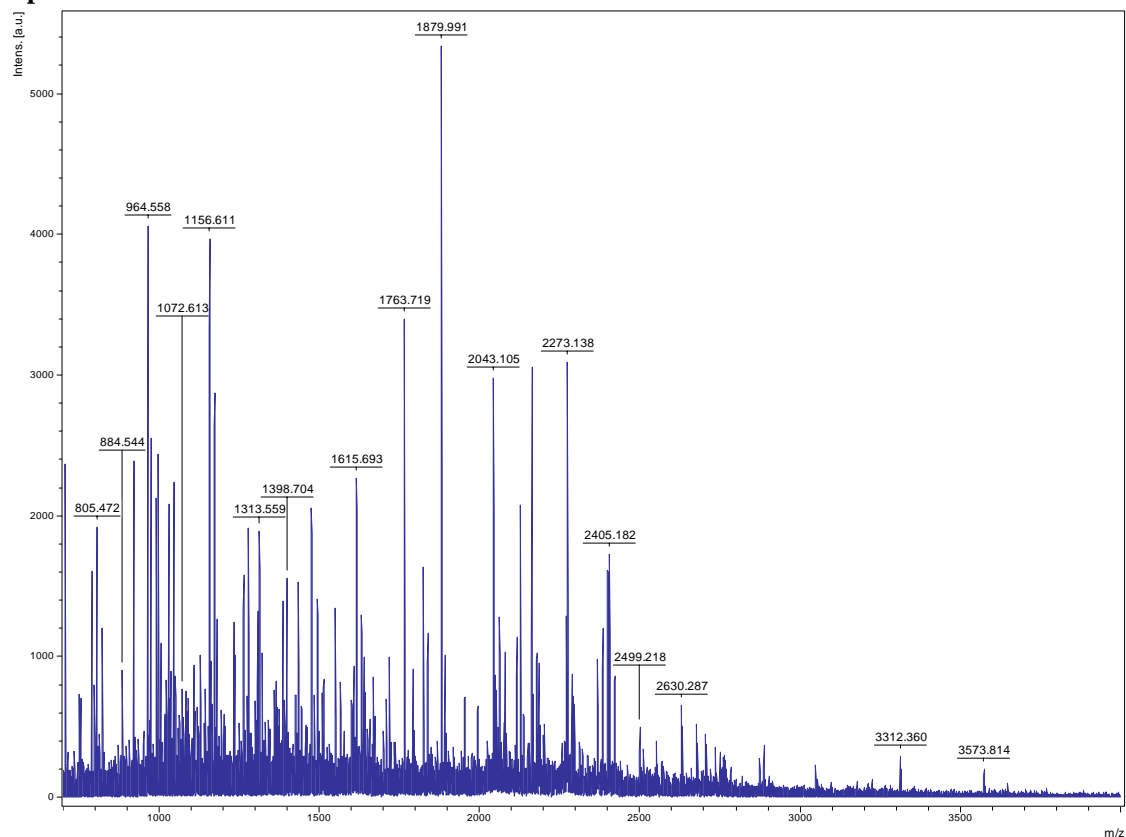

Match to: gi|50948547 Score: 262 Expect: 2.6e-21

#### Matched peptides:

| Start - End | Observed  | Mr (expt) | Mr (calc) | Delta   | Miss Sequence                                |
|-------------|-----------|-----------|-----------|---------|----------------------------------------------|
| 39 - 57     | 1879.9910 | 1878.9837 | 1878.9799 | 0.0038  | 0 K.IAVSPGTEGTSPLTLHGR.D                     |
| 115 - 129   | 1763.7189 | 1762.7116 | 1762.7039 | 0.0077  | 0 K.STGNFCTQCEAEGFR.K 2 Carbamidomethyl (C)  |
| 115 - 130   | 1891.8176 | 1890.8104 | 1890.7988 | 0.0115  | 1 K.STGNFCTQCEAEGFR.KI 2 Carbamidomethyl (C) |
| 175 - 184   | 1305.6412 | 1304.6340 | 1304.6189 | 0.0150  | 0 K.HYALWEDPFK.K                             |
| 201 - 210   | 1159.5195 | 1158.5123 | 1158.4611 | 0.0511  | 0 R.EDSFTTCSGR.K Carbamidomethyl (C)         |
| 216 - 225   | 1128.6283 | 1127.6210 | 1127.5975 | 0.0235  | 0 R.IWTPGQDLAK.T                             |
| 226 - 234   | 1037.5549 | 1036.5477 | 1036.5011 | 0.0465  | 0 K.TAHAMYSLK.A Oxidation (M)                |
| 270 - 277   | 964.5582  | 963.5509  | 963.5137  | 0.0371  | 0 K.SLNIFQSR.L                               |
| 278 - 310   | 3573.8145 | 3572.8072 | 3572.7323 | 0.0748  | 0 R.LVLASPETATDGDYAAAILGVVGHYFFHNWTGNR.V     |
| 311 - 322   | 1509.7468 | 1508.7396 | 1508.7809 | -0.0414 | 1 R.VTCRDWFQLTLK.E                           |
| 315 - 322   | 1050.5858 | 1049.5785 | 1049.5546 | 0.0240  | 0 R.DWFQLTLK.E                               |
| 323 - 329   | 821.4901  | 820.4828  | 820.4443  | 0.0386  | 0 K.EGLTVFR.D                                |
| 323 - 340   | 2115.9709 | 2114.9637 | 2114.9691 | -0.0054 | 1 K.EGLTVFRDQEFSSDLGCR.T Carbamidomethyl (C) |
| 330 - 340   | 1313.5594 | 1312.5522 | 1312.5354 | 0.0168  | 0 R.DQEFSSDLGCR.T Carbamidomethyl (C)        |
| 330 - 343   | 1641.7600 | 1640.7527 | 1640.7464 | 0.0063  | 1 R.DQEFSSDLGCR.TVK.R Carbamidomethyl (C)    |
| 384 - 392   | 989.4876  | 988.4803  | 988.4436  | 0.0367  | 0 K.TMFGASGFR.K Oxidation (M)                |
| 393 - 401   | 1173.5983 | 1172.5910 | 1172.5648 | 0.0262  | 1 R.KGMDLYFQR.H Oxidation (M)                |
| 394 - 401   | 1029.5143 | 1028.5070 | 1028.4749 | 0.0321  | 0 K.GMDLYFQR.H                               |
| 441 - 455   | 1606.8018 | 1605.7945 | 1605.7522 | 0.0423  | 0 K.VSSSYDASSQTFSLK.F                        |
| 519 - 538   | 2399.2910 | 2398.2837 | 2398.2896 | -0.0058 | 1 K.KEEEFIFNNIPEKVPVPSLLR.G                  |
| 520 - 538   | 2271.1707 | 2270.1634 | 2270.1946 | -0.0312 | 0 K.EEEFIFNNIPEKVPVPSLLR.G                   |
| 546 - 568   | 2676.2512 | 2675.2439 | 2675.2238 | 0.0201  | 0 R.LDSDLTESDLFFLLANDSDEFNR.W                |
| 651 - 668   | 2043.1047 | 2042.0975 | 2042.1007 | -0.0033 | 1 K.ELALQLKDDLLSTVTNRS                       |
| 669 - 682   | 1615.6929 | 1614.6856 | 1614.6732 | 0.0124  | 0 R.SSEAYTFNHDSMAR.R                         |
| 669 - 682   | 1631.6608 | 1630.6535 | 1630.6682 | -0.0147 | 0 R.SSEAYTFNHDSMAR.R Oxidation (M)           |
| 711 - 733   | 2405.1821 | 2404.1749 | 2404.1804 | -0.0056 | 0 K.SATNMTEQFAAALAALSQNPQV.R.D               |
| 711 - 733   | 2421.1726 | 2420.1653 | 2420.1754 | -0.0100 | 0 K.SATNMTEQFAAALAALSQNPQV.R.D Oxidation (M) |
| 734 - 753   | 2499.2180 | 2498.2107 | 2498.2117 | -0.0010 | 1 R.DDTLLDFYKNWQHLYLVVSK.W                   |
| 744 - 753   | 1274.6738 | 1273.6666 | 1273.6455 | 0.0211  | 0 K.WQHLYLVVSK.W                             |
| 773 - 782   | 1156.6115 | 1155.6042 | 1155.5859 | 0.0183  | 0 K.LLGHPAFDMR.N                             |
| 773 - 782   | 1172.6039 | 1171.5966 | 1171.5808 | 0.0158  | 0 K.LLGHPAFDMR.N Oxidation (M)               |
| 787 - 804   | 1952.9691 | 1951.9618 | 1951.9614 | 0.0005  | 0 K.VYSLIGGFCGSPVNFHAK.D Carbamidomethyl (C) |
| 811 - 829   | 2126.1992 | 2125.1919 | 2125.1895 | 0.0025  | 1 K.FLGEVVLQDLKINPQV.ASR.M                   |
| 822 - 829   | 884.5440  | 883.5367  | 883.4875  | 0.0492  | 0 K.INPQV.ASR.M                              |
| 850 - 871   | 2366.2495 | 2365.2422 | 2365.1834 | 0.0588  | 0 K.AQLEMIVSANGLESENVEIASK.S                 |

## Spot 1345

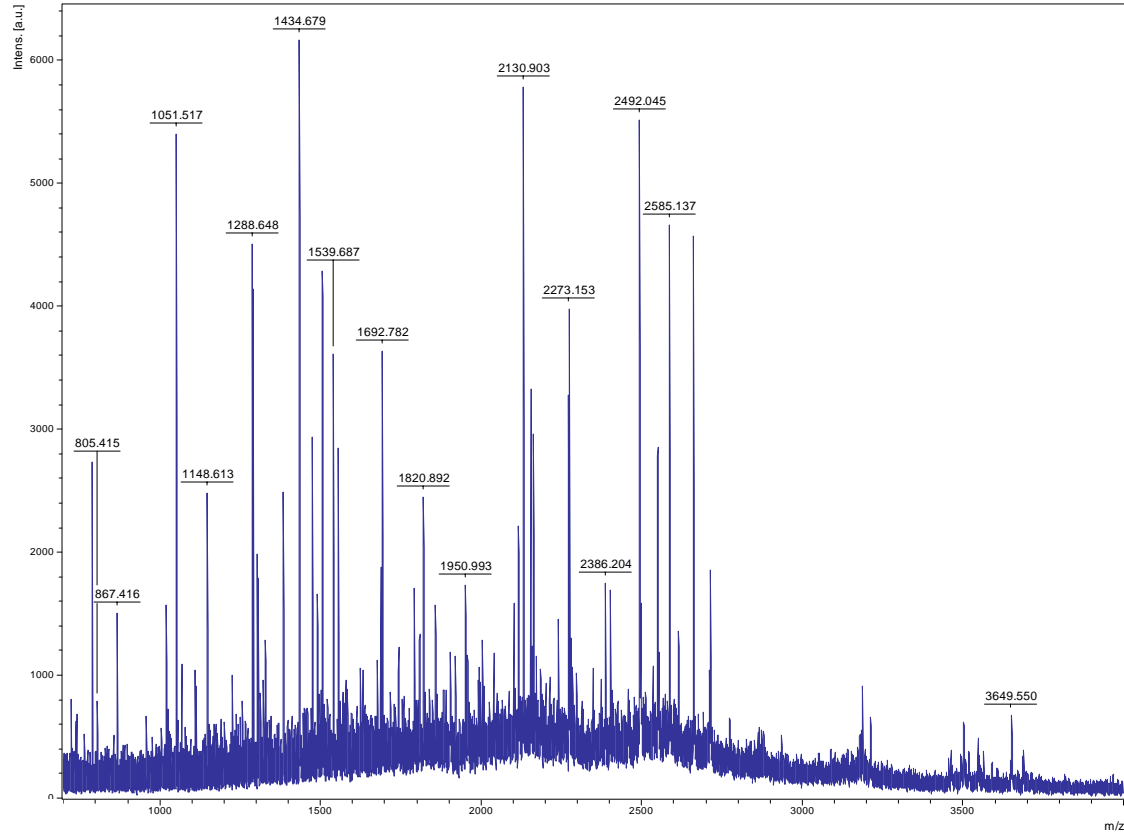

Match to: gi|3252794 Score: 135 Expect: 2.1e-09

Matched peptides:

| Start - End | Observed  | Mr (expt) | Mr (calc) | Delta   | Miss Sequence                                         |
|-------------|-----------|-----------|-----------|---------|-------------------------------------------------------|
| 1 - 17      | 1820.9150 | 1819.9077 | 1819.9072 | -0.0005 | 1 -.VEAVVMPERYALGGACR.V                               |
| 10 - 17     | 867.3774  | 866.3701  | 866.4068  | -0.0367 | 0 R.YALGGACR.V Carbamidomethyl (C)                    |
| 75 - 95     | 2535.2187 | 2534.2114 | 2534.2164 | -0.0050 | 0 R.TGNVWHVFIIEGELHNMLYGYR.F                          |
| 166 - 175   | 1288.6832 | 1287.6759 | 1287.6645 | 0.0114  | 0 K.DLVIYEMHLR.G                                      |
| 166 - 175   | 1304.6751 | 1303.6678 | 1303.6594 | 0.0084  | 0 K.DLVIYEMHLR.G Oxidation (M)                        |
| 273 - 291   | 2102.0786 | 2101.0713 | 2101.0149 | 0.0564  | 0 R.GIEVIMDVVFNHTAEGNEK.G                             |
| 292 - 298   | 789.3996  | 788.3923  | 788.4544  | -0.0621 | 0 K.GPILSFR.G                                         |
| 333 - 340   | 1051.5161 | 1050.5088 | 1050.5168 | -0.0080 | 0 R.EFIVDCLR.Y Carbamidomethyl (C)                    |
| 341 - 352   | 1555.7229 | 1554.7156 | 1554.6925 | 0.0231  | 0 R.YWVTEMHVDGFR.F Oxidation (M)                      |
| 407 - 427   | 2386.2119 | 2385.2046 | 2385.1905 | 0.0141  | 0 K.LIAEAWDAGGLYQVGQPPHWK.I                           |
| 428 - 435   | 1019.4748 | 1018.4675 | 1018.4872 | -0.0197 | 0 K.IWSEWNGK.Y                                        |
| 446 - 470   | 2585.1076 | 2584.1003 | 2584.1222 | -0.0219 | 0 K.GTDFGAGGFAECLCGSPHLYQAGGR.K 2 Carbamidomethyl (C) |
| 507 - 529   | 2492.0744 | 2491.0671 | 2491.0709 | -0.0038 | 0 R.DGENHLSWNCGEEGEGFAGLSVK.R                         |
| 563 - 579   | 2130.9066 | 2129.8993 | 2129.8762 | 0.0232  | 0 K.GGNNNTYCHDHVYNYFR.W Carbamidomethyl (C)           |
| 592 - 600   | 1148.6349 | 1147.6276 | 1147.5518 | 0.0758  | 1 R.FCSLMTKFR.K Oxidation (M)                         |
| 602 - 616   | 1692.8256 | 1691.8183 | 1691.7937 | 0.0246  | 0 K.QCESLGLADFPTAQR.L Carbamidomethyl (C)             |
| 617 - 634   | 2155.0526 | 2154.0453 | 2154.0143 | 0.0310  | 0 R.LHWHGHQPGKPDWSETSR.F                              |
| 671 - 693   | 2660.2579 | 2659.2506 | 2659.2806 | -0.0299 | 0 R.WEPLVDTGKPAPYDFLTDDLPR.V                          |

### Spot 1347

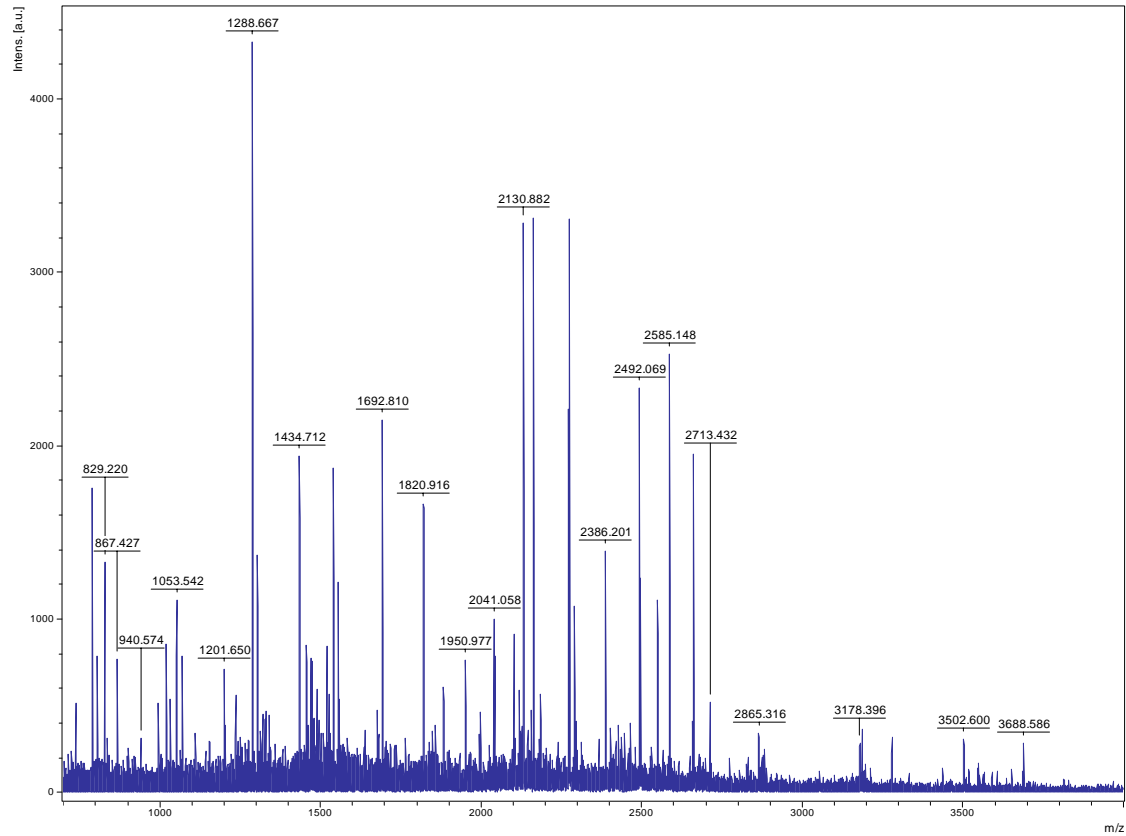

Match to: gj|3252794 Score: 165 Expect: 2.6e-11

#### Matched peptides:

| Start - End | Observed  | Mr (expt) | Mr (calc) | Delta   | Miss Sequence                                                   |
|-------------|-----------|-----------|-----------|---------|-----------------------------------------------------------------|
| 1 - 17      | 1820.9155 | 1819.9083 | 1819.9072 | 0.0010  | 1 -.VEAVVMPEYALGGACR.V                                          |
| 10 - 17     | 867.4271  | 866.4198  | 866.4068  | 0.0130  | 0 R.YALGGACR.V Carbamidomethyl (C)                              |
| 166 - 175   | 1288.6675 | 1287.6602 | 1287.6645 | -0.0043 | 0 K.DLVIYEMHLR.G                                                |
| 166 - 175   | 1304.6552 | 1303.6479 | 1303.6594 | -0.0115 | 0 K.DLVIYEMHLR.G Oxidation (M)                                  |
| 180 - 197   | 1883.9283 | 1882.9211 | 1882.9173 | 0.0038  | 0 K.HSSSNVEHPGTYIGAIK.L                                         |
| 203 - 228   | 3178.3955 | 3177.3882 | 3177.3551 | 0.0331  | 0 K.ELGVNVCVELMPCHEFNELEYFSCSSK.M 3 Carbamidomethyl (C)         |
| 273 - 291   | 2102.0161 | 2101.0088 | 2101.0149 | -0.0061 | 0 R.GIEVIMDVVFNHTAEGNEK.G                                       |
| 273 - 291   | 2118.0071 | 2116.9998 | 2117.0098 | -0.0100 | 0 R.GIEVIMDVVFNHTAEGNEK.G Oxidation (M)                         |
| 299 - 311   | 1472.7346 | 1471.7273 | 1471.7017 | 0.0257  | 0 R.GIDNSTYYMLAPK.G                                             |
| 299 - 311   | 1488.7196 | 1487.7123 | 1487.6966 | 0.0157  | 0 R.GIDNSTYYMLAPK.G Oxidation (M)                               |
| 333 - 340   | 994.5085  | 993.5013  | 993.4953  | 0.0060  | 0 R.EFIVDCLR.Y                                                  |
| 333 - 340   | 1051.5215 | 1050.5142 | 1050.5168 | -0.0026 | 0 R.EFIVDCLR.Y Carbamidomethyl (C)                              |
| 341 - 352   | 1555.7190 | 1554.7117 | 1554.6925 | 0.0192  | 0 R.YWVTEMHVDGFR.F Oxidation (M)                                |
| 353 - 361   | 1053.5421 | 1052.5348 | 1052.5324 | 0.0024  | 0 R.FDLASIMTR.G                                                 |
| 353 - 361   | 1069.5303 | 1068.5230 | 1068.5274 | -0.0044 | 0 R.FDLASIMTR.G Oxidation (M)                                   |
| 407 - 427   | 2386.2009 | 2385.1937 | 2385.1905 | 0.0031  | 0 K.LIAEAWDAGGLYQVGQPPHWK.I                                     |
| 428 - 435   | 1019.4866 | 1018.4793 | 1018.4872 | -0.0079 | 0 K.IWSEWNGK.Y                                                  |
| 446 - 470   | 2585.1484 | 2584.1412 | 2584.1222 | 0.0189  | 0 K.GTDGFAGGFAECLCGSPHLYQAGGR.K 2 Carbamidomethyl (C)           |
| 507 - 529   | 2492.0688 | 2491.0616 | 2491.0709 | -0.0093 | 0 R.DGENHNLSWNCGEEGEFAGLSVK.R                                   |
| 507 - 529   | 2549.1130 | 2548.1058 | 2548.0924 | 0.0134  | 0 R.DGENHNLSWNCGEEGEFAGLSVK.R Carbamidomethyl (C)               |
| 563 - 579   | 2130.8816 | 2129.8743 | 2129.8762 | -0.0018 | 0 K.GGNNNTYCHDHYVNYFR.W Carbamidomethyl (C)                     |
| 602 - 616   | 1675.7693 | 1674.7620 | 1674.7672 | -0.0051 | 0 K.QCESLGLADFPPTAQR.L Carbamidomethyl (C); Pyro-glu (N-term Q) |
| 602 - 616   | 1692.8097 | 1691.8024 | 1691.7937 | 0.0087  | 0 K.QCESLGLADFPPTAQR.L Carbamidomethyl (C)                      |
| 671 - 693   | 2660.3103 | 2659.3030 | 2659.2806 | 0.0225  | 0 R.WEPLVDTGKPAFYDFLTDLLPDR.V                                   |



# Spot 1355

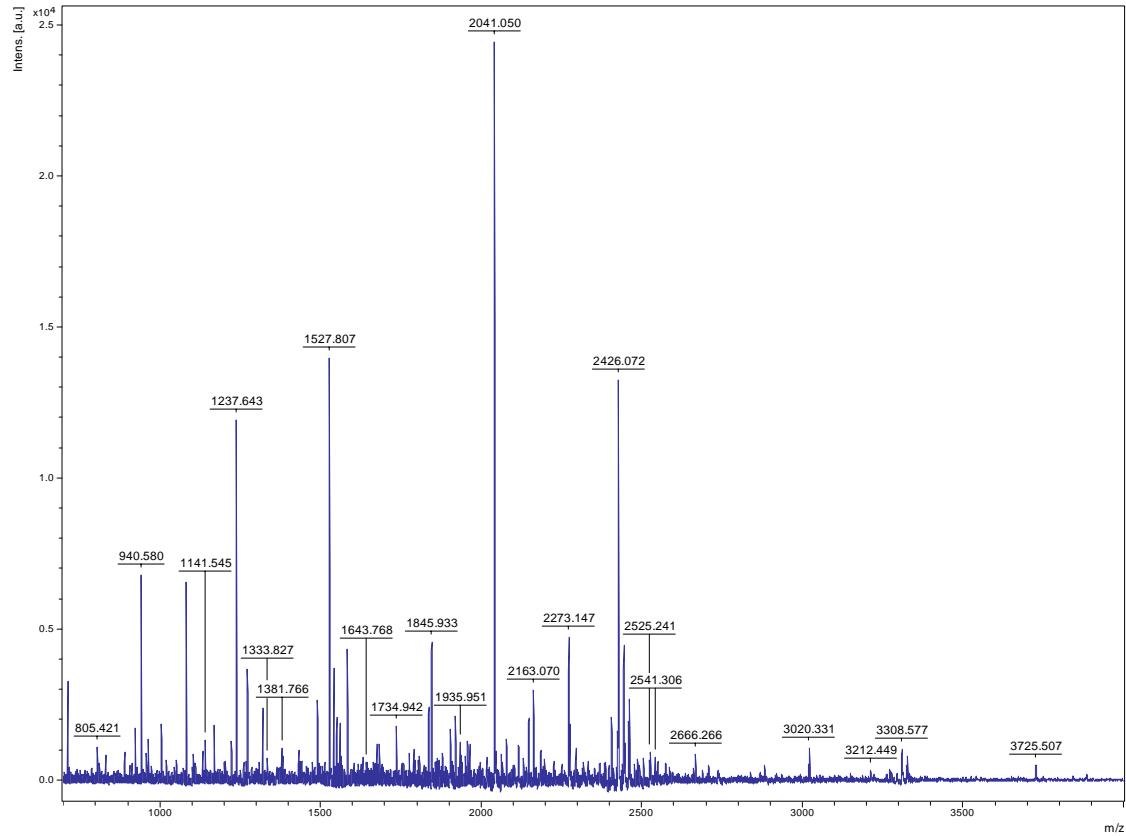

Match to: gi|50725880 Score: 128 Expect: 1.1e-08

## Matched peptides:

| Start - End | Observed  | Mr (expt) | Mr (calc) | Delta   | Miss Sequence                                   |
|-------------|-----------|-----------|-----------|---------|-------------------------------------------------|
| 35 - 48     | 1560.8069 | 1559.7996 | 1559.8155 | -0.0158 | 1 R.ELISNSSDALDKIR.F                            |
| 58 - 72     | 1734.9464 | 1733.9391 | 1733.9352 | 0.0039  | 0 K.LDAQPELFHIVPDK.A                            |
| 89 - 100    | 1272.6619 | 1271.6546 | 1271.6833 | -0.0287 | 0 K.SDLVNNLGTIAR.S                              |
| 142 - 162   | 2426.0606 | 2425.0533 | 2425.0570 | -0.0037 | 0 K.HNDDEQYVWESQAGGSFTVTR.D                     |
| 175 - 190   | 2041.0391 | 2040.0318 | 2040.0415 | -0.0097 | 1 K.ITLYLKDDQLEYLEER.T                          |
| 198 - 213   | 1965.0413 | 1964.0340 | 1964.0043 | -0.0297 | 1 K.KHSEFISYPISLWTEK.T                          |
| 199 - 213   | 1836.9068 | 1835.8995 | 1835.9094 | -0.0098 | 0 K.HSEFISYPISLWTEK.T                           |
| 236 - 243   | 962.3447  | 961.3374  | 961.4240  | -0.0866 | 0 K.VEDVDEEK.E                                  |
| 255 - 272   | 2294.1565 | 2293.1492 | 2293.1789 | -0.0297 | 1 K.EVSHWVNMNKQKPIWLR.K                         |
| 273 - 287   | 1845.9165 | 1844.9092 | 1844.9196 | -0.0103 | 1 R.KPEITKEEYAAFYK.S                            |
| 288 - 300   | 1541.7523 | 1540.7450 | 1540.7521 | -0.0071 | 0 K.SLTNDWEEHLAVK.H                             |
| 301 - 311   | 1320.6178 | 1319.6105 | 1319.6509 | -0.0404 | 0 K.HFSVEGQLEFK.A                               |
| 319 - 328   | 1237.6156 | 1236.6083 | 1236.6251 | -0.0168 | 1 K.RAPFDLFDTR.K                                |
| 360 - 373   | 1527.7883 | 1526.7810 | 1526.7940 | -0.0130 | 0 K.GIVDSEDLPLNISR.E                            |
| 393 - 404   | 1441.7318 | 1440.7245 | 1440.6958 | 0.0287  | 0 K.CVLFPEIAENK.E                               |
| 443 - 456   | 1583.7864 | 1582.7791 | 1582.7838 | -0.0047 | 1 K.SGDELTSLKDYVTR.M                            |
| 457 - 472   | 1862.9171 | 1861.9098 | 1861.8767 | 0.0331  | 1 R.MKEGQSEIYYITGESK.K                          |
| 457 - 472   | 1878.9087 | 1877.9014 | 1877.8716 | 0.0298  | 1 R.MKEGQSEIYYITGESK.K Oxidation (M)            |
| 473 - 483   | 1261.5991 | 1260.5918 | 1260.6713 | -0.0795 | 1 K.KAVENSPFLEK.L                               |
| 474 - 483   | 1133.5077 | 1132.5004 | 1132.5764 | -0.0760 | 0 K.AVENSPFLEK.L                                |
| 487 - 507   | 2420.2406 | 2419.2333 | 2419.1980 | 0.0353  | 1 K.KGYEVLYMVDIDAIDEYAVGQLK.E Oxidation (M)     |
| 488 - 512   | 2882.4523 | 2881.4450 | 2881.3730 | 0.0720  | 1 K.GYEVLYMVDIDAIDEYAVGQLKEFEGK.K Oxidation (M) |
| 606 - 620   | 1775.8000 | 1774.7927 | 1774.8229 | -0.0302 | 0 K.TMEINPENAIMDEL.R.K                          |
| 606 - 620   | 1807.8523 | 1806.8450 | 1806.8128 | 0.0323  | 0 K.TMEINPENAIMDEL.R.K 2 Oxidation (M)          |
| 606 - 621   | 1919.9672 | 1918.9599 | 1918.9128 | 0.0471  | 1 K.TMEINPENAIMDEL.R.K Oxidation (M)            |
| 606 - 621   | 1935.9417 | 1934.9344 | 1934.9077 | 0.0267  | 1 K.TMEINPENAIMDEL.R.K.R 2 Oxidation (M)        |

# Spot 1356

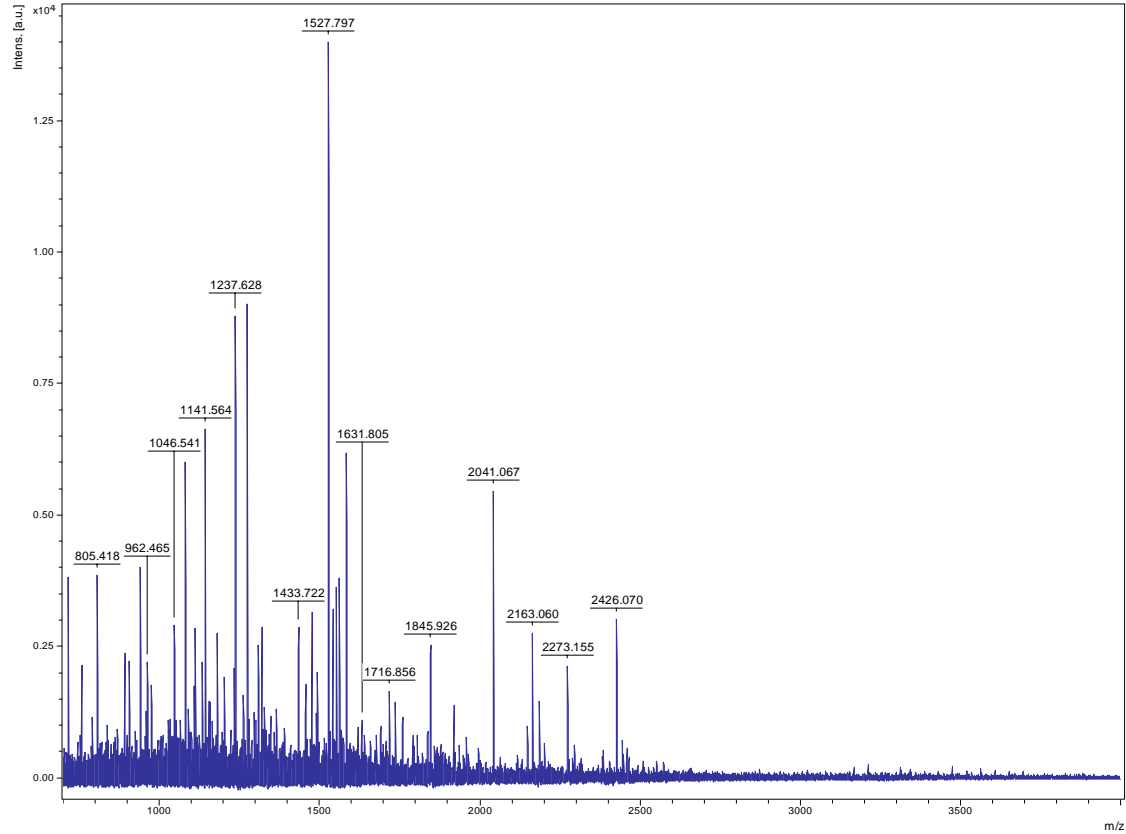

Match to: gi|39104468 Score: 161 Expect: 5.3e-12

| Start - End | Observed  | Mr (expt) | Mr (calc) | Delta   | Miss Sequence                                                   |
|-------------|-----------|-----------|-----------|---------|-----------------------------------------------------------------|
| 35 - 48     | 1560.8469 | 1559.8396 | 1559.8155 | 0.0242  | 1 R.ELISNSSDALDKIR.F                                            |
| 47 - 55     | 1108.5609 | 1107.5536 | 1107.5924 | -0.0388 | 1 K.IRFESLTDK.S                                                 |
| 58 - 72     | 1734.9459 | 1733.9386 | 1733.9352 | 0.0034  | 0 K.LDAQPELFHIVPDK.A                                            |
| 89 - 100    | 1272.6907 | 1271.6834 | 1271.6833 | 0.0001  | 0 K.SDLVNNLGTIAR.S                                              |
| 142 - 162   | 2426.0342 | 2425.0269 | 2425.0570 | -0.0301 | 0 K.HNDDEQYVWESQAGGSFTVTR.D                                     |
| 163 - 171   | 962.3974  | 961.3901  | 961.4465  | -0.0563 | 0 R.DTSGEQLGR.G                                                 |
| 175 - 190   | 2041.0699 | 2040.0626 | 2040.0415 | 0.0211  | 1 K.ITLYLKDDQLEYLEER.R                                          |
| 199 - 213   | 1836.9336 | 1835.9263 | 1835.9094 | 0.0170  | 0 K.HSEFISYPISLWTEK.T                                           |
| 255 - 265   | 1388.6880 | 1387.6807 | 1387.6190 | 0.0617  | 0 K.EVSHWVNMNK.Q Oxidation (M)                                  |
| 266 - 272   | 940.5159  | 939.5086  | 939.5654  | -0.0568 | 0 K.QKPIWLR.K                                                   |
| 273 - 287   | 1845.9440 | 1844.9367 | 1844.9196 | 0.0172  | 1 R.KPEEITKEEYAAFYK.S                                           |
| 288 - 300   | 1541.7681 | 1540.7608 | 1540.7521 | 0.0087  | 0 K.SLTNDWEEHLAVK.H                                             |
| 301 - 311   | 1320.6492 | 1319.6419 | 1319.6509 | -0.0090 | 0 K.HFSVGEQLEFK.A                                               |
| 319 - 328   | 1237.6403 | 1236.6330 | 1236.6251 | 0.0079  | 1 K.RAPFDLDFTR.K                                                |
| 360 - 373   | 1527.8250 | 1526.8177 | 1526.7940 | 0.0237  | 0 K.GIVDSEDLPLNISRE                                             |
| 393 - 409   | 2148.0080 | 2147.0007 | 2146.9880 | 0.0127  | 1 K.CVLFPEIAENKEDYK.F Carbamidomethyl (C)                       |
| 410 - 416   | 891.3585  | 890.3512  | 890.4174  | -0.0662 | 0 K.FYEAFSK.N                                                   |
| 443 - 456   | 1583.8074 | 1582.8001 | 1582.7838 | 0.0163  | 1 K.SGDELTSCLKDYVTR.M                                           |
| 457 - 472   | 1878.8794 | 1877.8721 | 1877.8716 | 0.0005  | 1 R.MKEGQSEIYYITGESK.K Oxidation (M)                            |
| 473 - 483   | 1261.6735 | 1260.6662 | 1260.6713 | -0.0051 | 1 K.KAVENSPFLEK.L                                               |
| 474 - 483   | 1133.5496 | 1132.5423 | 1132.5764 | -0.0341 | 0 K.AVENSPFLEK.L                                                |
| 565 - 585   | 2444.0207 | 2443.0134 | 2443.0606 | -0.0472 | 0 R.VVDSPCCLVTGEYGWANMER.I 2 Carbamidomethyl (C)                |
| 565 - 585   | 2460.0469 | 2459.0396 | 2459.0555 | -0.0159 | 0 R.VVDSPCCLVTGEYGWANMER.I 2 Carbamidomethyl (C); Oxidation (M) |

# Spot 1360

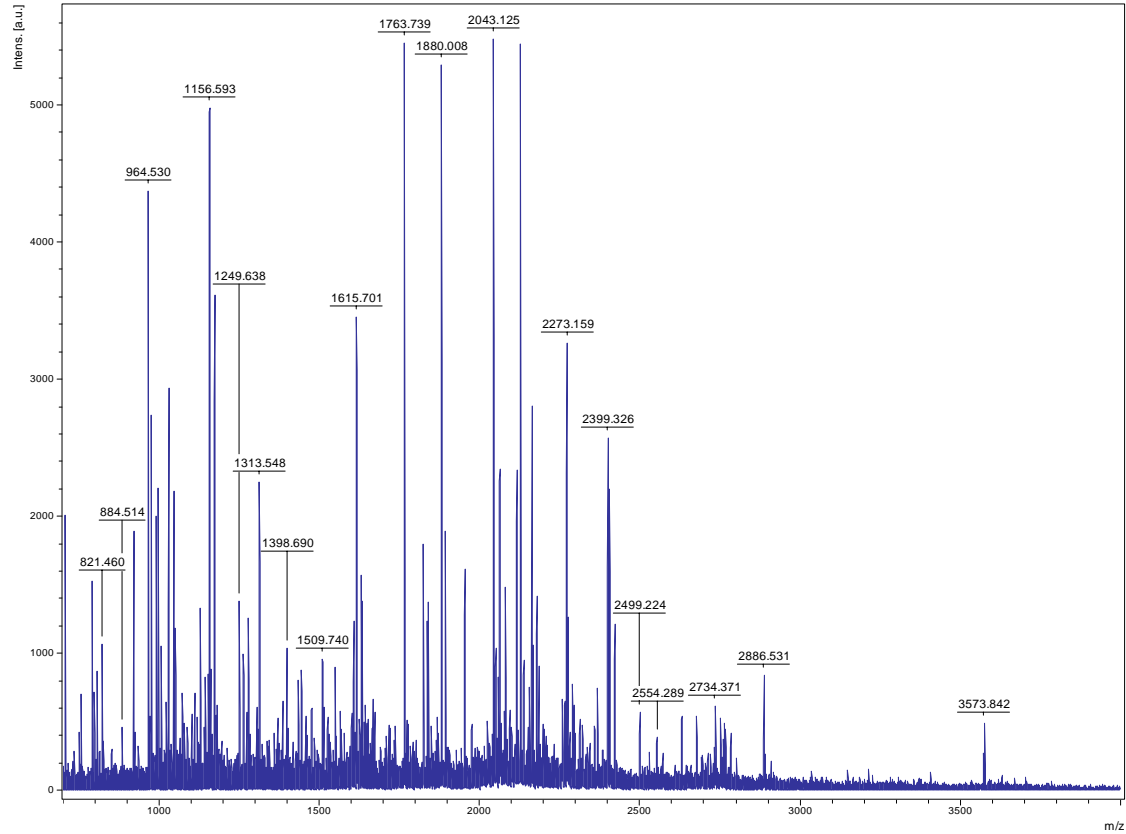

Match to: gi|42408435 Score: 391 Expect: 1.1e-34

## Matched peptides:

| Start - End | Observed  | Mr (expt) | Mr (calc) | ppm | Miss Sequence                                     |
|-------------|-----------|-----------|-----------|-----|---------------------------------------------------|
| 1 - 10      | 1249.6378 | 1248.6306 | 1248.6788 | -39 | 1 -.MDLPKEIFL.K.E Oxidation (M)                   |
| 39 - 57     | 1880.0075 | 1879.0003 | 1878.9799 | 11  | 0 K.IAVSPGTEGTSSPLTLHGR.D                         |
| 70 - 81     | 1457.6839 | 1456.6766 | 1456.6504 | 18  | 1 K.DLKSEDMVDSR.H                                 |
| 73 - 81     | 1101.4787 | 1100.4715 | 1100.4444 | 25  | 0 K.SEDYMVDSR.H                                   |
| 115 - 129   | 1763.7385 | 1762.7312 | 1762.7039 | 15  | 0 K.STGNFCTQCEAEGRF.K                             |
| 115 - 130   | 1891.8307 | 1890.8234 | 1890.7989 | 13  | 1 K.STGNFCTQCEAEGRF.I                             |
| 130 - 147   | 2265.0895 | 2264.0822 | 2264.0718 | 5   | 1 R.KITYFQDRPDVMATYTCT.R.I                        |
| 131 - 147   | 2137.0038 | 2135.9965 | 2135.9769 | 9   | 0 K.IITYFQDRPDVMATYTCT.R.I                        |
| 148 - 174   | 2886.5315 | 2885.5242 | 2885.5022 | 8   | 1 R.IEADKTLYPVLLSNGNLIEQDLEGGK.H                  |
| 175 - 184   | 1305.6383 | 1304.6310 | 1304.6190 | 9   | 0 K.HYALWEDPFK.K                                  |
| 201 - 210   | 1159.4969 | 1158.4896 | 1158.4612 | 25  | 0 R.EDSFTTCSGR.K                                  |
| 216 - 225   | 1128.5891 | 1127.5819 | 1127.5975 | -14 | 0 R.IWTPGQDLAK.T                                  |
| 270 - 277   | 964.5296  | 963.5223  | 963.5138  | 9   | 0 K.SLNIQSR.L                                     |
| 278 - 310   | 3573.8416 | 3572.8343 | 3572.7325 | 29  | 0 R.LVLASPETATGDYAAILGVVGHYFHNWTGNR.V             |
| 315 - 322   | 1050.5562 | 1049.5490 | 1049.5546 | -5  | 0 R.DWFQLTLK.E                                    |
| 323 - 329   | 821.4596  | 820.4523  | 820.4443  | 10  | 0 K.EGLTVFR.D                                     |
| 323 - 340   | 2115.9948 | 2114.9875 | 2114.9691 | 9   | 1 K.EGLTVFRDQEFSSDLGCR.T                          |
| 330 - 340   | 1313.5480 | 1312.5407 | 1312.5354 | 4   | 0 R.DQEFSSDLGCR.T                                 |
| 330 - 343   | 1641.7554 | 1640.7482 | 1640.7464 | 1   | 1 R.DQEFSSDLGCR.TVK.R                             |
| 353 - 374   | 2554.2894 | 2553.2821 | 2553.2587 | 9   | 0 R.TYQFPQDAGPMAHPIRPHYSYIK.G                     |
| 384 - 392   | 989.4559  | 988.4486  | 988.4437  | 5   | 0 K.TMFGASGFR.K Oxidation (M)                     |
| 393 - 401   | 1173.5870 | 1172.5797 | 1172.5648 | 13  | 1 R.KGMDLYFQR.H Oxidation (M)                     |
| 394 - 401   | 1029.4909 | 1028.4836 | 1028.4749 | 8   | 0 K.GMDLYFQR.H                                    |
| 441 - 455   | 1606.7752 | 1605.7679 | 1605.7522 | 10  | 0 K.VSSYDASSQTFSLK.F                              |
| 519 - 538   | 2399.3255 | 2398.3182 | 2398.2896 | 12  | 1 K.EEEFIFNPIEKPVPVSLLR.G                         |
| 520 - 538   | 2271.2089 | 2270.2016 | 2270.1946 | 3   | 0 K.EEEFIFNPIEKPVPVSLLR.G                         |
| 546 - 568   | 2676.2775 | 2675.2702 | 2675.2239 | 17  | 0 R.LDSDLTESDLFFLLANDSDEFNR.W                     |
| 609 - 619   | 1265.6700 | 1264.6627 | 1264.6663 | -3  | 1 R.NTSLDKKEFIK.A                                 |
| 620 - 645   | 2734.3712 | 2733.3639 | 2733.3288 | 13  | 0 K.AITLPGQGEIMDMMPVADPDVAHVAVR.T                 |
| 620 - 645   | 2750.3628 | 2749.3555 | 2749.3237 | 12  | 0 K.AITLPGQGEIMDMMPVADPDVAHVAVR.T Oxidation (M)   |
| 620 - 645   | 2766.3332 | 2765.3259 | 2765.3187 | 3   | 0 K.AITLPGQGEIMDMMPVADPDVAHVAVR.T 2 Oxidation (M) |
| 651 - 668   | 2043.1254 | 2042.1181 | 2042.1008 | 9   | 1 K.ELALQLKDDLLSTVTNNR.S                          |
| 669 - 682   | 1615.7014 | 1614.6941 | 1614.6732 | 13  | 0 R.SSEAYTFNHDSMAR.R                              |
| 669 - 682   | 1631.6880 | 1630.6807 | 1630.6682 | 8   | 0 R.SSEAYTFNHDSMAR.R Oxidation (M)                |
| 687 - 710   | 2762.3551 | 2761.3478 | 2761.3156 | 12  | 0 K.NTCLAYLASLNEPDTTEAFVEYK.S                     |
| 711 - 733   | 2405.2237 | 2404.2165 | 2404.1805 | 15  | 0 K.SATNMTEQFAALAALSQNPQVQR.D                     |
| 711 - 733   | 2421.2013 | 2420.1940 | 2420.1754 | 8   | 0 K.SATNMTEQFAALAALSQNPQVQR.D Oxidation (M)       |
| 734 - 753   | 2499.2242 | 2498.2169 | 2498.2118 | 2   | 1 R.RDITLLDFYKQWHDYLVVSK.W                        |
| 744 - 753   | 1274.6495 | 1273.6422 | 1273.6455 | -3  | 0 K.WQHDYLVVSK.W                                  |
| 754 - 772   | 2059.0509 | 2058.0436 | 2058.0534 | -5  | 0 K.WFALQATSDIPGNVANVQKL                          |
| 773 - 782   | 1156.5935 | 1155.5862 | 1155.5859 | 0   | 0 K.LLGHFAFDMR.N                                  |
| 773 - 782   | 1172.5760 | 1171.5687 | 1171.5808 | -10 | 0 K.LLGHFAFDMR.N Oxidation (M)                    |
| 787 - 804   | 1952.9710 | 1951.9637 | 1951.9615 | 1   | 0 K.VYSLIGGFCGSPVNFHAK.D                          |
| 811 - 821   | 1260.7173 | 1259.7101 | 1259.7125 | -2  | 0 K.FLGEVVVLQDK.I                                 |
| 811 - 829   | 2126.2213 | 2125.2140 | 2125.1895 | 12  | 1 K.FLGEVVVLQDKINQVAVR.M                          |
| 822 - 829   | 884.5142  | 883.5069  | 883.4875  | 22  | 0 K.INPQVAVR.M                                    |
| 839 - 844   | 825.4153  | 824.4080  | 824.3777  | 37  | 1 R.RYDES.R.Q                                     |
| 850 - 871   | 2366.2150 | 2365.2077 | 2365.1835 | 10  | 0 K.AQLEMIVSANGLSENVYEIASK.S                      |

Spot 1370

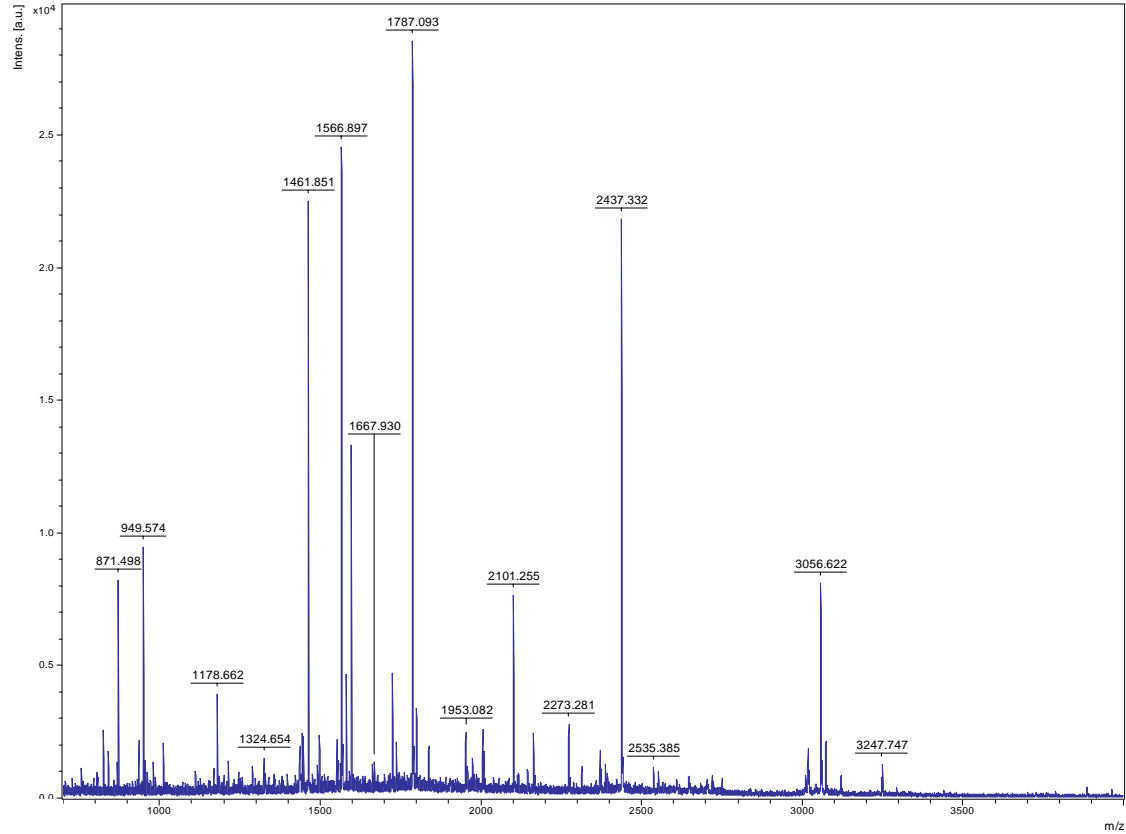

Match to: gi|77554415 Score: 97 Expect: 1.3e-05

Matched peptides:

| Start - End | Observed  | Mr (expt) | Mr (calc) | Delta   | Miss Sequence                                       |
|-------------|-----------|-----------|-----------|---------|-----------------------------------------------------|
| 63 - 93     | 3056.4708 | 3055.4635 | 3055.5607 | -0.0972 | 0 K.VVGIDLGTTSAVAAMEGGKPTVIITNAEGQR.T               |
| 63 - 93     | 3072.4877 | 3071.4804 | 3071.5556 | -0.0752 | 0 K.VVGIDLGTTSAVAAMEGGKPTVIITNAEGQR.T Oxidation (M) |
| 116 - 129   | 1579.8854 | 1578.8781 | 1578.8041 | 0.0740  | 0 R.QAVVNPEPTFFSVK.R                                |
| 116 - 130   | 1735.9719 | 1734.9646 | 1734.9052 | 0.0594  | 1 R.QAVVNPEPTFFSVKR.F                               |
| 168 - 180   | 1461.8320 | 1460.8247 | 1460.7623 | 0.0624  | 0 K.QFAAEISAQVLR.K                                  |
| 197 - 210   | 1566.8702 | 1565.8629 | 1565.7838 | 0.0792  | 0 K.AVVTVPAYFNDSQR.T                                |
| 227 - 242   | 1723.9748 | 1722.9675 | 1722.8828 | 0.0847  | 0 R.IINEPTAASLAYGFEK.K                              |
| 290 - 299   | 1178.6327 | 1177.6254 | 1177.6131 | 0.0123  | 0 K.VVDWLASNFK.K                                    |
| 323 - 348   | 2750.3328 | 2749.3255 | 2749.4207 | -0.0952 | 1 K.AKMELSTLSQTNISLPPFITATADGPK.H Oxidation (M)     |
| 325 - 348   | 2535.2987 | 2534.2914 | 2534.2938 | -0.0023 | 0 K.MELSTLSQTNISLPPFITATADGPK.H                     |
| 325 - 348   | 2551.2494 | 2550.2421 | 2550.2887 | -0.0466 | 0 K.MELSTLSQTNISLPPFITATADGPK.H Oxidation (M)       |
| 380 - 399   | 2101.1636 | 2100.1563 | 2100.1062 | 0.0501  | 1 R.DAKLSVDNLDEVILVGGSTR.I                          |
| 383 - 399   | 1787.0353 | 1786.0280 | 1785.9472 | 0.0809  | 0 K.LSVDNLDEVILVGGSTR.I                             |
| 400 - 408   | 1012.5807 | 1011.5734 | 1011.5964 | -0.0230 | 0 R.IPSVQELVK.K                                     |
| 442 - 464   | 2370.3540 | 2369.3467 | 2369.3127 | 0.0341  | 0 K.DVVLDDVTPLSLGLLETLGGVMTK.I                      |
| 442 - 464   | 2386.2950 | 2385.2877 | 2385.3076 | -0.0199 | 0 K.DVVLDDVTPLSLGLLETLGGVMTK.I Oxidation (M)        |
| 477 - 499   | 2437.2111 | 2436.2038 | 2436.1768 | 0.0271  | 0 K.SEVFTAADGQTSVEINVLQGER.E                        |
| 500 - 506   | 949.5155  | 948.5082  | 948.4664  | 0.0418  | 1 R.EFVRDNK.S Acetyl (N-term)                       |
| 513 - 521   | 935.4963  | 934.4890  | 934.5236  | -0.0346 | 0 R.LDGIPAPR.G                                      |
| 530 - 545   | 1661.9423 | 1660.9350 | 1660.8671 | 0.0679  | 0 K.FDIDANGILSVAAIDK.G                              |
| 530 - 549   | 2005.1378 | 2004.1305 | 2004.0527 | 0.0778  | 1 K.FDIDANGILSVAAIDKGTGK.K                          |
| 551 - 568   | 1973.1006 | 1972.0933 | 1972.0113 | 0.0821  | 1 K.QDITITGASTLPKDEVER.M                            |

# Spot 1376

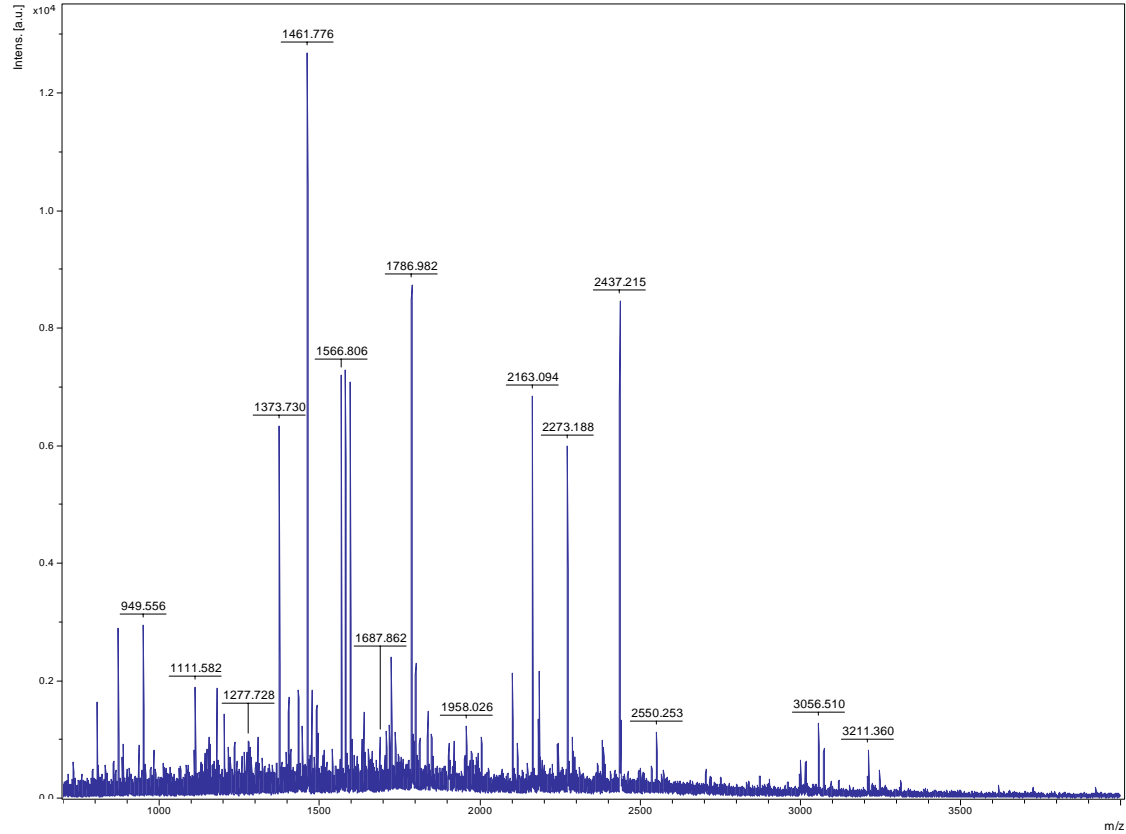

Match to: Q2QV45\_ORYSA Score: 108 Expect: 1.1e-06

| Start - End | Observed  | Mr (expt) | Mr (calc) | Delta   | Miss Sequence                                      |
|-------------|-----------|-----------|-----------|---------|----------------------------------------------------|
| 63 - 93     | 3056.5103 | 3055.5030 | 3055.5607 | -0.0577 | 0 K.VVGIDLGTNSAVAAMEGGKPTVITNAEGQR.T               |
| 63 - 93     | 3072.4741 | 3071.4668 | 3071.5556 | -0.0888 | 0 K.VVGIDLGTNSAVAAMEGGKPTVITNAEGQR.T Oxidation (M) |
| 116 - 129   | 1579.8207 | 1578.8134 | 1578.8041 | 0.0093  | 0 R.QAVVNPENTFFSVK.R                               |
| 116 - 130   | 1735.9246 | 1734.9173 | 1734.9052 | 0.0120  | 1 R.QAVVNPENTFFSVKR.F                              |
| 168 - 180   | 1444.7540 | 1443.7468 | 1443.7357 | 0.0110  | 0 K.QFAAEIEISAVLR.K Pyro-glu (N-term Q)            |
| 168 - 180   | 1461.7760 | 1460.7687 | 1460.7623 | 0.0064  | 0 K.QFAAEIEISAVLR.K                                |
| 197 - 210   | 1566.8060 | 1565.7988 | 1565.7838 | 0.0150  | 0 K.AVVTVPAYFNDSQR.T                               |
| 227 - 242   | 1723.9067 | 1722.8995 | 1722.8828 | 0.0167  | 0 R.IINEPTAASLAYGFEK.K                             |
| 290 - 299   | 1178.6359 | 1177.6286 | 1177.6131 | 0.0155  | 0 K.VVDWLASNFK.K                                   |
| 357 - 369   | 1595.7975 | 1594.7902 | 1594.7661 | 0.0241  | 1 R.AKFEELCSDLIDR.L Carbamidomethyl (C)            |
| 359 - 371   | 1580.8241 | 1579.8168 | 1579.7915 | 0.0253  | 1 K.FEELCSDLIDRLK.T                                |
| 372 - 379   | 871.4940  | 870.4867  | 870.4923  | -0.0056 | 0 K.TPVTNALR.D                                     |
| 380 - 399   | 2101.1575 | 2100.1502 | 2100.1062 | 0.0440  | 1 R.DAKLSVDNLDEVILVGGSTR.I                         |
| 383 - 399   | 1786.9817 | 1785.9744 | 1785.9472 | 0.0272  | 0 K.LSDVDNLDEVILVGGSTR.I                           |
| 477 - 499   | 2437.2146 | 2436.2073 | 2436.1768 | 0.0306  | 0 K.SEVFSTAADGQTSVEINVLQGER.E                      |
| 513 - 521   | 935.5417  | 934.5345  | 934.5236  | 0.0109  | 0 R.LDGPPAPR.G                                     |
| 530 - 549   | 2005.0630 | 2004.0557 | 2004.0527 | 0.0030  | 1 K.FDIDANGILSVAIDKGTGK.K                          |

## Spot 1382

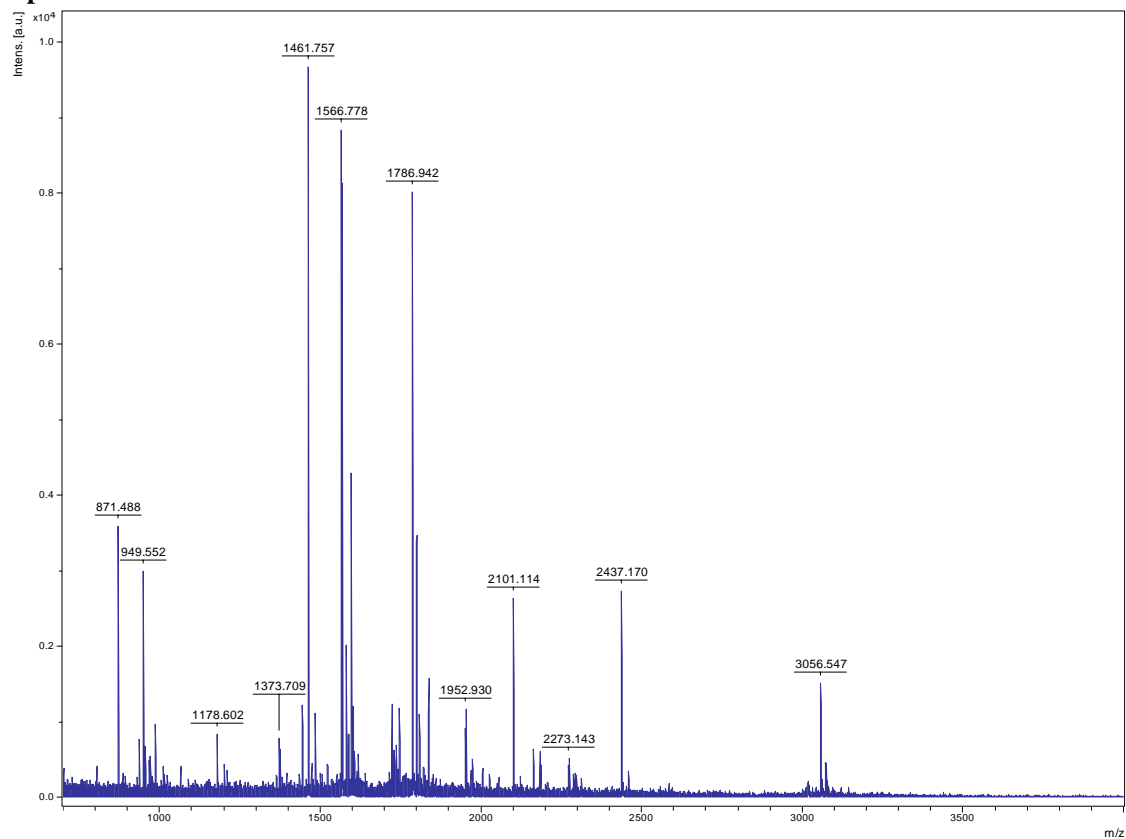

Match to: gi|77554415; Score: 157

### Matched peptides:

| Start - End | Observed | Mr (expt) | Mr (calc) | Delta | Miss Sequence                                  |
|-------------|----------|-----------|-----------|-------|------------------------------------------------|
| 63 - 93     | 3056.55  | 3055.55   | 3055.56   | -0.02 | 0 VVGIDLGTNSAVAAMEGGKPTVITNAEGQR               |
| 63 - 93     | 3072.55  | 3071.54   | 3071.56   | -0.01 | 0 VVGIDLGTNSAVAAMEGGKPTVITNAEGQR Oxidation (M) |
| 94 - 103    | 1066.56  | 1065.56   | 1065.57   | -0.01 | 0 TTPSVVAYTK                                   |
| 116 - 129   | 1579.80  | 1578.80   | 1578.80   | -0.01 | 0 QAVVNPENTFFSVK                               |
| 116 - 130   | 1735.91  | 1734.91   | 1734.91   | 0.00  | 1 QAVVNPENTFFSVKR                              |
| 145 - 152   | 987.53   | 986.53    | 986.53    | -0.00 | 0 QVSYHVVR                                     |
| 168 - 180   | 1444.73  | 1443.73   | 1443.74   | -0.01 | 0 QFAAEEISAQVLR Pyro-glu (N-term Q)            |
| 168 - 180   | 1461.76  | 1460.76   | 1460.76   | -0.01 | 0 QFAAEEISAQVLR                                |
| 197 - 210   | 1566.78  | 1565.78   | 1565.78   | -0.01 | 0 AVVTVPAYFNDSQR                               |
| 227 - 242   | 1723.88  | 1722.87   | 1722.88   | -0.01 | 0 IINEPTAASLAYGF EK                            |
| 290 - 299   | 1178.60  | 1177.60   | 1177.61   | -0.01 | 0 VVDWLASNFK                                   |
| 349 - 356   | 956.51   | 955.51    | 955.51    | -0.00 | 0 HIETTLR                                      |
| 357 - 369   | 1595.77  | 1594.76   | 1594.77   | -0.01 | 1 AKFEELCSDLIDR                                |
| 372 - 379   | 871.49   | 870.49    | 870.49    | -0.01 | 0 TPVTNLR                                      |
| 380 - 399   | 2101.11  | 2100.11   | 2100.11   | 0.01  | 1 DARLSVDNLDEVILVGGSTR                         |
| 383 - 399   | 1786.94  | 1785.94   | 1785.95   | -0.01 | 0 LSVNLDDEVILVGGSTR                            |
| 400 - 408   | 1012.57  | 1011.57   | 1011.60   | -0.03 | 0 IPSVQELVK                                    |
| 477 - 499   | 2437.17  | 2436.17   | 2436.18   | -0.01 | 0 SEVFSTAADGQTSVEINVLQGER                      |
| 513 - 521   | 935.54   | 934.54    | 934.52    | 0.01  | 0 LDGIPPAPR                                    |
| 551 - 568   | 1973.00  | 1971.99   | 1972.01   | -0.02 | 1 QDITITGASTLPKDEVER                           |

## Spot 1385

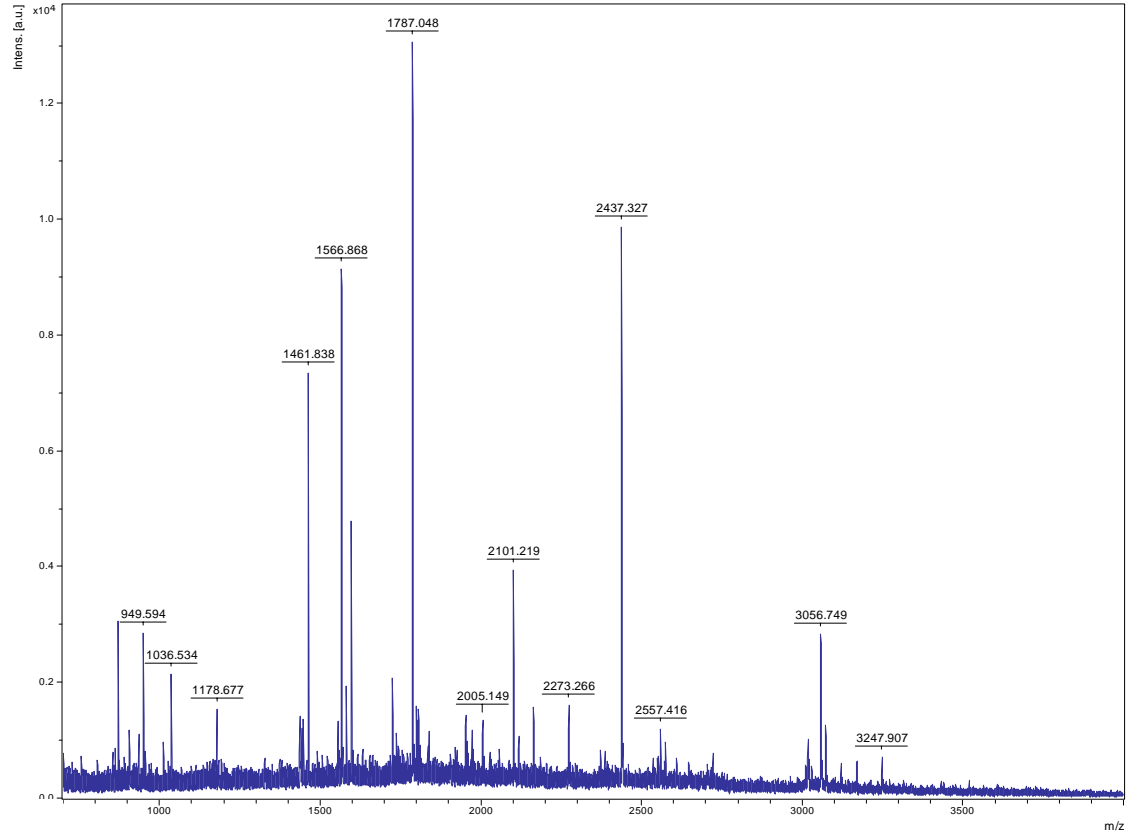

Match to: gi|7754415 Score: 104 Expect: 2.7e-06

### Matched peptides:

| Start - End | Observed  | Mr (expt) | Mr (calc) | Delta   | Miss Sequence                              |
|-------------|-----------|-----------|-----------|---------|--------------------------------------------|
| 116 - 129   | 1579.8912 | 1578.8839 | 1578.8041 | 0.0798  | 0 R.QAVVNPEPTFFSVK.R                       |
| 116 - 130   | 1735.9495 | 1734.9422 | 1734.9052 | 0.0370  | 1 R.QAVVNPEPTFFSVKR.F                      |
| 168 - 180   | 1461.8457 | 1460.8384 | 1460.7623 | 0.0761  | 0 K.QFAAEEISAQVLR.K                        |
| 168 - 181   | 1631.8933 | 1630.8860 | 1630.8678 | 0.0182  | 1 K.QFAAEEISAQVLR.L Acetyl (N-term)        |
| 197 - 210   | 1566.8551 | 1565.8478 | 1565.7838 | 0.0641  | 0 K.AVVTVPAAYFNDSQR.T                      |
| 227 - 242   | 1723.9497 | 1722.9424 | 1722.8828 | 0.0596  | 0 R.IINEPTAASLAYGFEK.K                     |
| 290 - 299   | 1178.6909 | 1177.6836 | 1177.6131 | 0.0705  | 0 K.VVDWLASNFK.K                           |
| 325 - 348   | 2535.3342 | 2534.3269 | 2534.2938 | 0.0332  | 0 K.MELSTLSQTNISLPFITATADGPK.H             |
| 357 - 369   | 1595.8556 | 1594.8483 | 1594.7661 | 0.0823  | 1 R.AKFEELCSDLIDR.L Carbamidomethyl (C)    |
| 380 - 399   | 2101.1531 | 2100.1458 | 2100.1062 | 0.0396  | 1 R.DAKLSVDNLDEVILVGGSTR.I                 |
| 383 - 399   | 1787.0077 | 1786.0004 | 1785.9472 | 0.0532  | 0 K.LSVDNLDEVILVGGSTR.I                    |
| 442 - 464   | 2370.2899 | 2369.2826 | 2369.3127 | -0.0300 | 0 K.DVVLVDVTPSLGLLETGGVMTK.I               |
| 442 - 464   | 2386.2942 | 2385.2869 | 2385.3076 | -0.0207 | 0 K.DVVLVDVTPSLGLLETGGVMTK.I Oxidation (M) |
| 477 - 499   | 2437.1792 | 2436.1719 | 2436.1768 | -0.0048 | 0 K.SEVFSTAADGQTSVEINVLQGER.E              |
| 500 - 506   | 949.5734  | 948.5661  | 948.4664  | 0.0997  | 1 R.EFVRDNK.S Acetyl (N-term)              |
| 530 - 549   | 2005.0995 | 2004.0922 | 2004.0527 | 0.0395  | 1 K.FDIDANGILSVAIDKGTGK.K                  |
| 551 - 568   | 1973.0659 | 1972.0586 | 1972.0113 | 0.0474  | 1 K.QDITITGASTLPKDEVER.M                   |

## Spot 1386

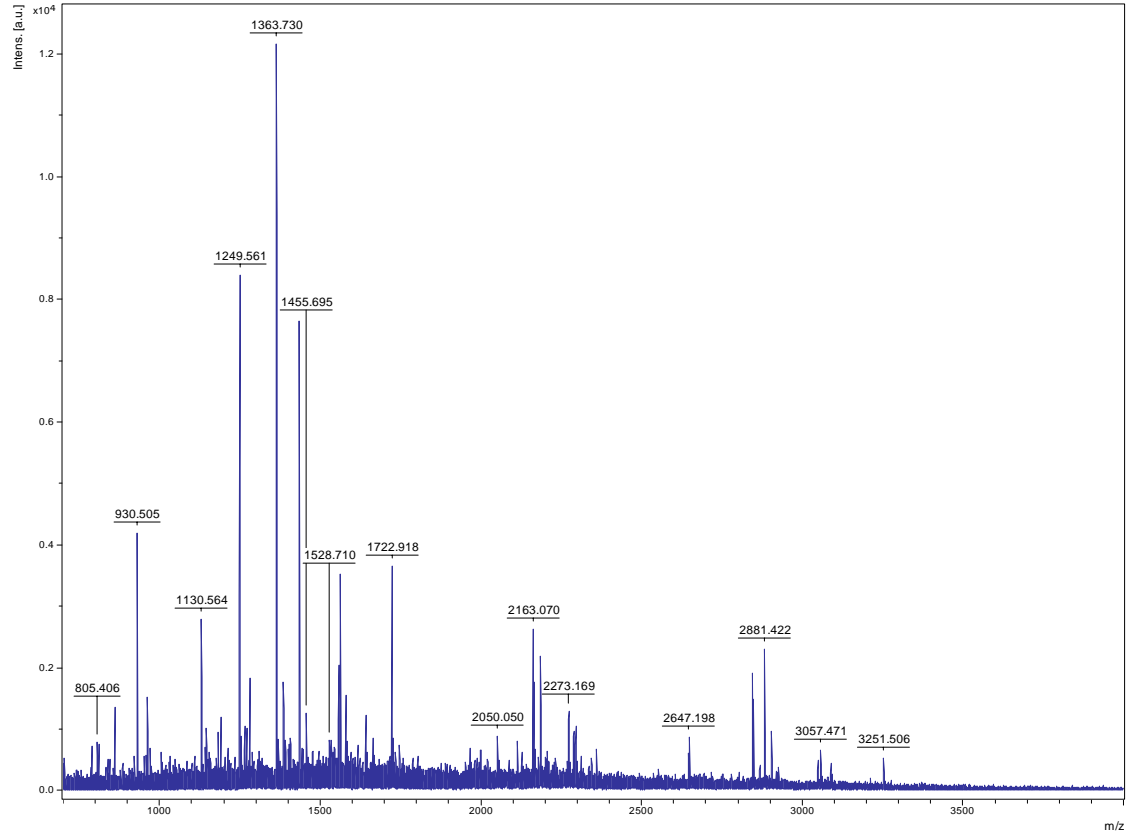

Match to: gi|77551210; Score: 101

### Matched peptides:

| Start - End | Observed | Mr (expt) | Mr (calc) | Delta | Miss Sequence                  |
|-------------|----------|-----------|-----------|-------|--------------------------------|
| 93 - 104    | 1561.81  | 1560.81   | 1560.81   | 0.00  | 1 KFVYVEQAFFQR                 |
| 94 - 104    | 1433.72  | 1432.72   | 1432.71   | 0.00  | 0 FVYVEQAFFQR                  |
| 156 - 166   | 1363.73  | 1362.73   | 1362.73   | -0.00 | 1 FIKKEFGQIPR                  |
| 198 - 206   | 1181.55  | 1180.55   | 1180.55   | -0.00 | 1 IDYQDRDTR                    |
| 211 - 217   | 930.51   | 929.50    | 929.50    | 0.01  | 0 ELEVVWR                      |
| 221 - 235   | 1557.79  | 1556.79   | 1556.79   | -0.00 | 0 TFGSSADIFAGIFPK              |
| 286 - 298   | 1528.71  | 1527.71   | 1527.68   | 0.02  | 0 TNHVMFTMGTFDK                |
| 299 - 307   | 1249.56  | 1248.56   | 1248.56   | 0.00  | 0 YQYAESWFR                    |
| 322 - 336   | 1642.84  | 1641.84   | 1641.82   | 0.01  | 0 VNALYSTPSIYTDAK              |
| 337 - 346   | 1190.62  | 1189.62   | 1189.62   | -0.01 | 0 HAENVPWPLK                   |
| 377 - 386   | 1130.56  | 1129.56   | 1129.56   | 0.00  | 0 VMSGYYLAAR                   |
| 377 - 386   | 1146.55  | 1145.55   | 1145.55   | -0.00 | 0 VMSGYYLAAR Oxidation (M)     |
| 387 - 392   | 811.41   | 810.40    | 810.43    | -0.02 | 0 QLEFFK                       |
| 395 - 422   | 2881.42  | 2880.42   | 2880.37   | 0.05  | 0 SNSDLTDSLADALALAQHHDVAVTGTEK |
| 432 - 442   | 1265.64  | 1264.64   | 1264.68   | -0.04 | 1 RLSIGYTQAEK                  |
| 509 - 524   | 1722.92  | 1721.92   | 1721.89   | 0.02  | 0 IPVISDSIVVHDSEGR             |



### Spot 1389

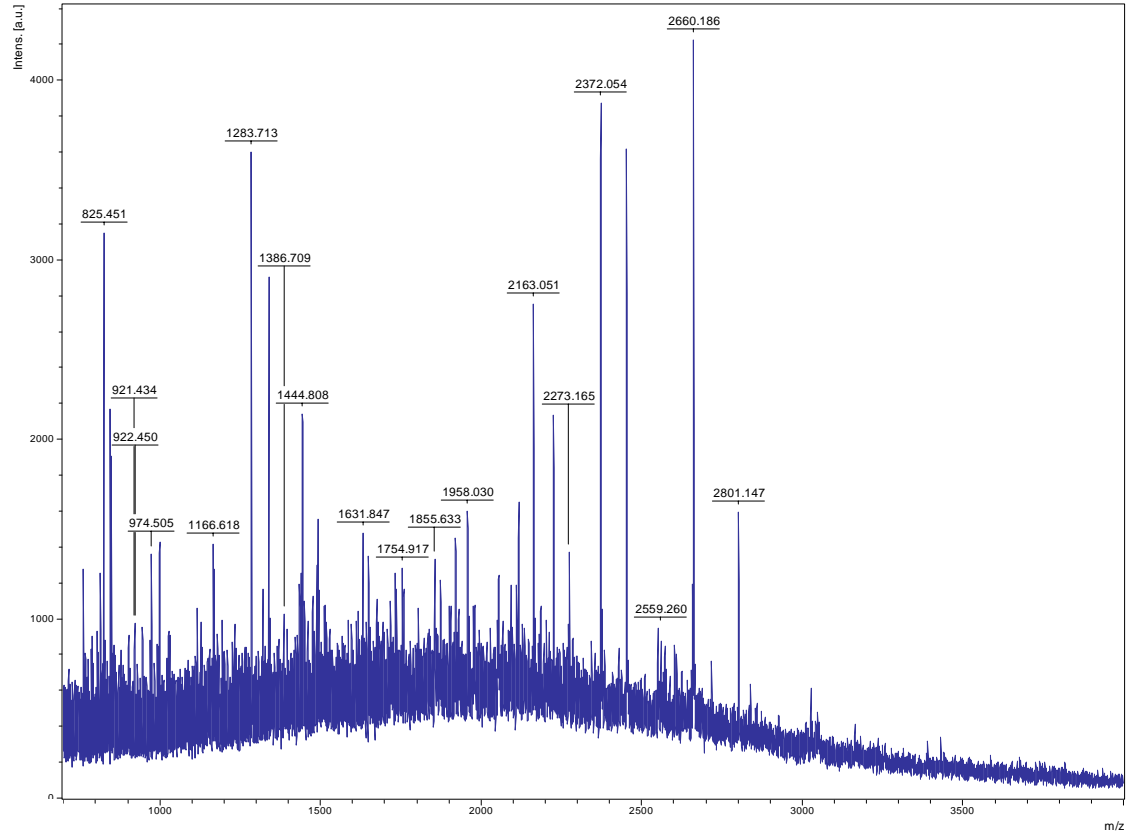

Match to: gi|51854277 Score: 68 Expect: 0.01

| Start - End | Observed  | Mr (expt) | Mr (calc) | Delta   | Miss Sequence                            |
|-------------|-----------|-----------|-----------|---------|------------------------------------------|
| 56 - 68     | 1166.5387 | 1165.5314 | 1165.6203 | -0.0889 | 0 R.NPAGPAALAAASR.D                      |
| 69 - 91     | 2452.0676 | 2451.0603 | 2451.0713 | -0.0110 | 0 R.DSVFDFTSVDDSLAAAEDSSFR.L             |
| 110 - 119   | 1283.6632 | 1282.6559 | 1282.6894 | -0.0335 | 0 R.FNQRQLPQR.R                          |
| 163 - 174   | 1434.7101 | 1433.7028 | 1433.6609 | -0.0419 | 0 K.SSVDIQPDWTMR.E                       |
| 266 - 276   | 1339.6889 | 1338.6816 | 1338.7044 | -0.0228 | 0 R.SIHSWDIVVQR.V                        |
| 336 - 361   | 2801.1879 | 2800.1806 | 2800.2463 | -0.0657 | 1 R.DGEKVTDFEPNPFASEGEEAASVGYR.Y         |
| 340 - 361   | 2372.0886 | 2371.0813 | 2371.0603 | -0.0210 | 0 K.VTFDEPNPFASEGEEAASVGYR.Y             |
| 365 - 376   | 1444.8000 | 1443.7927 | 1443.7721 | -0.0206 | 1 R.WKLDDEISIVAR.C                       |
| 377 - 390   | 1438.6615 | 1437.6542 | 1437.6418 | -0.0124 | 0 R.CEVHAVNADPGGGR.Q Carbamidomethyl (C) |
| 507 - 519   | 1512.8737 | 1511.8664 | 1511.8823 | -0.0159 | 1 K.YVLVKDPAKQVRI                        |

# Spot 1390

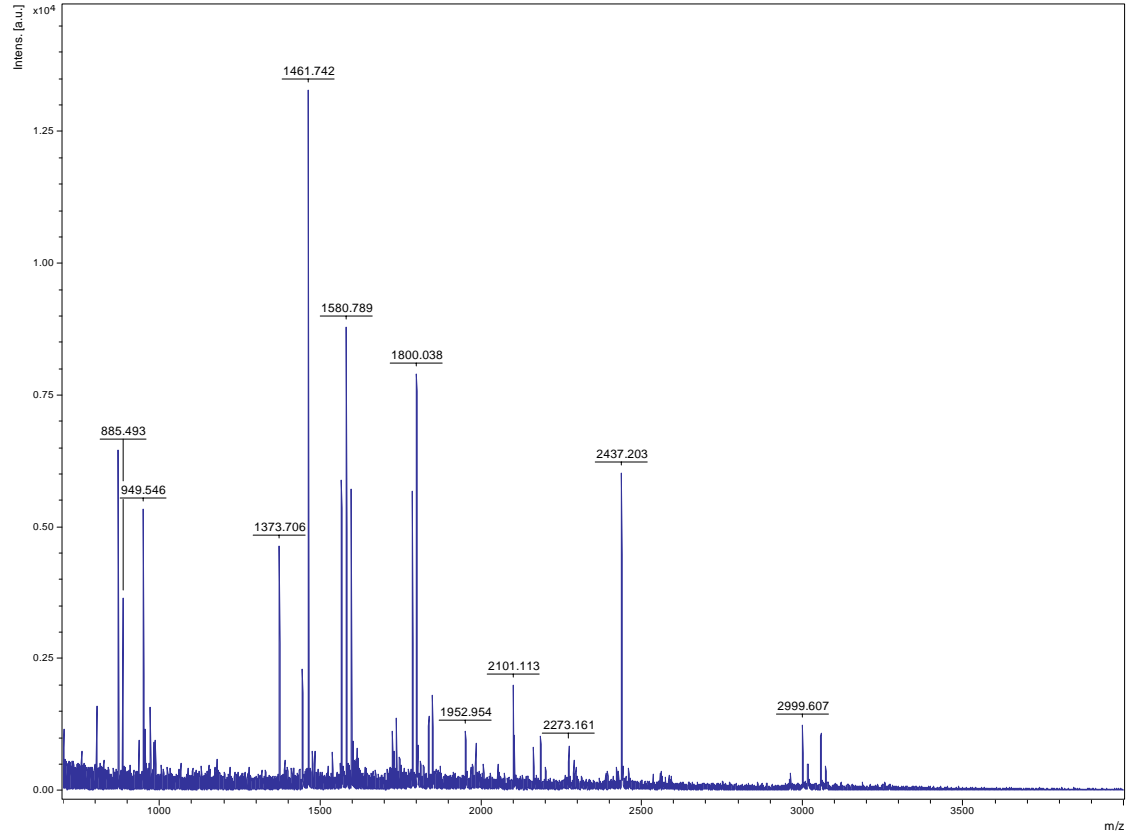

Match to: gi|7754415; Score: 100

## Matched peptides:

| Start - End | Observed | Mr (expt) | Mr (calc) | Delta | Miss Sequence                                  |
|-------------|----------|-----------|-----------|-------|------------------------------------------------|
| 63 - 93     | 3056.65  | 3055.64   | 3055.56   | 0.08  | 0 VVGIDLGTNSAVAAMEGGKPTVITNAEGQR               |
| 63 - 93     | 3072.64  | 3071.64   | 3071.56   | 0.08  | 0 VVGIDLGTNSAVAAMEGGKPTVITNAEGQR Oxidation (M) |
| 116 - 130   | 1735.91  | 1734.91   | 1734.91   | 0.00  | 1 QAVVNPENTFFSVKR                              |
| 145 - 152   | 970.53   | 969.52    | 969.50    | -0.02 | 0 QVSYHVVR Pyro-glu (N-term Q)                 |
| 145 - 152   | 987.53   | 986.52    | 986.53    | -0.01 | 0 QVSYHVVR                                     |
| 168 - 180   | 1444.71  | 1443.71   | 1443.74   | -0.02 | 0 QFAAEEISAQVLR Pyro-glu (N-term Q)            |
| 168 - 180   | 1461.74  | 1460.74   | 1460.76   | -0.02 | 0 QFAAEEISAQVLR                                |
| 197 - 210   | 1566.78  | 1565.77   | 1565.78   | -0.01 | 0 AVVTVPAYFNDSQR                               |
| 227 - 242   | 1723.89  | 1722.88   | 1722.88   | 0.00  | 0 IINEPTAASLAYGFKEK                            |
| 349 - 356   | 956.54   | 955.53    | 955.51    | 0.03  | 0 HIETLSR                                      |
| 357 - 369   | 1595.76  | 1594.76   | 1594.77   | -0.00 | 1 AKFEELCSDLIDR                                |
| 372 - 379   | 871.48   | 870.48    | 870.49    | -0.01 | 0 TPVTNLR                                      |
| 380 - 399   | 2101.11  | 2100.11   | 2100.11   | 0.00  | 1 DARLSVDNLDEVILVGGSTR                         |
| 383 - 399   | 1786.95  | 1785.95   | 1785.95   | 0.00  | 0 LSVNLDDEVILVGGSTR                            |
| 477 - 499   | 2437.20  | 2436.20   | 2436.18   | 0.02  | 0 SEVFSTAADGQTSVEINVLQGER                      |
| 513 - 521   | 935.56   | 934.55    | 934.52    | 0.03  | 0 LDGIPPAPR                                    |

## Spot 1394

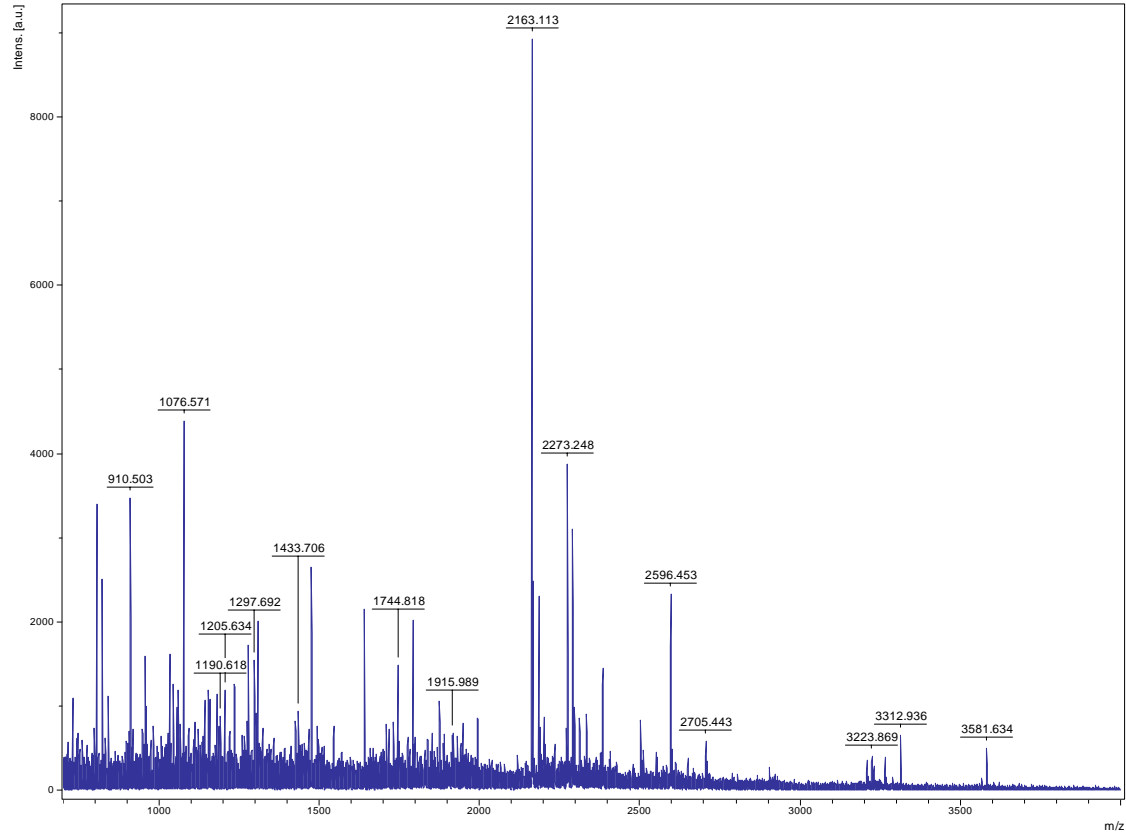

Match to: *gj*51964830; Score: 79

### Matched peptides:

| Start - End | Observed | Mr (expt) | Mr (calc) | Delta | Miss Sequence                   |
|-------------|----------|-----------|-----------|-------|---------------------------------|
| 10 - 18     | 957.56   | 956.55    | 956.50    | 0.05  | 0 DLAGGLQQR                     |
| 37 - 60     | 2596.45  | 2595.45   | 2595.23   | 0.22  | 0 VEYGDATTTIDPTCANVVAQAFPR      |
| 86 - 93     | 820.54   | 819.54    | 819.46    | 0.08  | 0 VGVVFSGR                      |
| 133 - 145   | 1467.73  | 1466.73   | 1466.75   | -0.02 | 0 TIEITDDVLASYK                 |
| 222 - 236   | 1744.82  | 1743.82   | 1743.81   | 0.00  | 0 NQFVETTVGFDTVCK               |
| 237 - 254   | 1874.97  | 1873.96   | 1873.96   | 0.01  | 0 VNSQLVSNVCLDAISAGK            |
| 255 - 260   | 910.50   | 909.50    | 909.44    | 0.06  | 0 YYYFVR                        |
| 293 - 301   | 1076.57  | 1075.57   | 1075.59   | -0.03 | 0 LTLMEVINK Oxidation (M)       |
| 474 - 488   | 1708.77  | 1707.77   | 1707.83   | -0.06 | 1 WRCAAAPLTAMMSVK Oxidation (M) |
| 493 - 514   | 2163.11  | 2162.11   | 2162.26   | -0.15 | 1 GPGAIPIGKPAIHPSIDLKGG         |

### Spot 1399

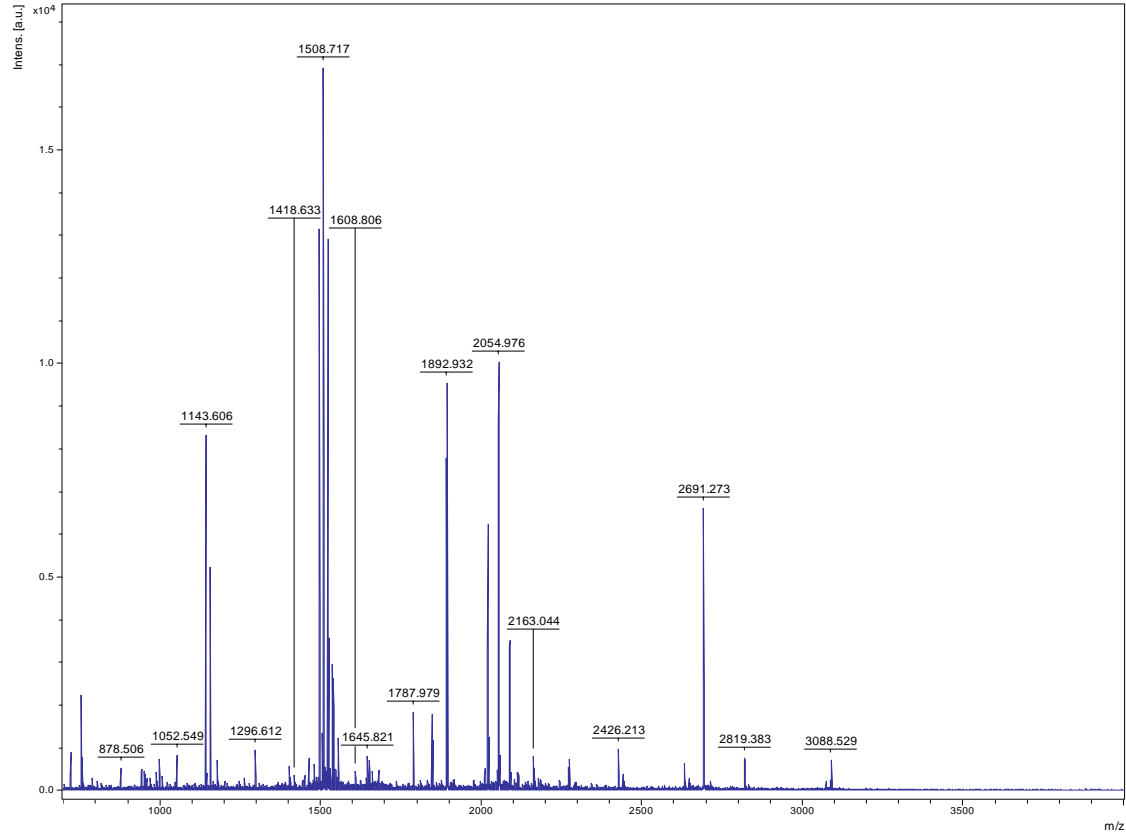

Match to: gj|41052822; Score: 298

#### Matched peptides:

| Start - End | Observed | Mr (expt) | Mr (calc) | Delta | Miss Sequence                           |
|-------------|----------|-----------|-----------|-------|-----------------------------------------|
| 32 - 51     | 2116.07  | 2115.07   | 2115.09   | -0.03 | 0 LGTVIGIDLGTTYSCVGVYK                  |
| 52 - 65     | 1536.74  | 1535.73   | 1535.74   | -0.01 | 0 NGHVEIHANDQGNR                        |
| 66 - 78     | 1508.72  | 1507.71   | 1507.73   | -0.02 | 0 ITPSWVAFTDSER                         |
| 86 - 94     | 998.50   | 997.50    | 997.49    | 0.00  | 0 NQAAVNPER                             |
| 95 - 101    | 878.51   | 877.50    | 877.50    | 0.00  | 1 TIFDVKR                               |
| 143 - 156   | 1506.75  | 1505.75   | 1505.78   | -0.03 | 0 VFSPEEVSAMILGK                        |
| 168 - 185   | 2021.02  | 2020.02   | 2020.04   | -0.02 | 1 KINDAVVTVPAYFNDAQR                    |
| 169 - 185   | 1892.93  | 1891.93   | 1891.94   | -0.01 | 0 INDVAVVTVPAYFNDAQR                    |
| 190 - 201   | 1155.63  | 1154.63   | 1154.64   | -0.01 | 0 DAGVIAGLNVAR                          |
| 202 - 217   | 1659.86  | 1658.86   | 1658.89   | -0.03 | 0 IINEPTAAAIAYGLDK                      |
| 202 - 218   | 1787.98  | 1786.98   | 1786.98   | -0.01 | 1 IINEPTAAAIAYGLDKK                     |
| 266 - 272   | 943.48   | 942.48    | 942.49    | -0.01 | 0 IMEYFIK                               |
| 266 - 272   | 959.49   | 958.48    | 958.48    | 0.00  | 0 IMEYFIK Oxidation (M)                 |
| 302 - 310   | 1052.55  | 1051.55   | 1051.55   | -0.01 | 0 ALSNQHQVR                             |
| 302 - 328   | 3088.53  | 3087.53   | 3087.53   | 0.00  | 1 ALSNQHQVREIEISLFDGTFDFSEPLTR          |
| 311 - 328   | 2054.98  | 2053.97   | 2053.98   | -0.01 | 0 VEIESLFDGTFDFSEPLTR                   |
| 331 - 340   | 1296.61  | 1295.61   | 1295.61   | -0.00 | 0 FEELNNDLFR                            |
| 349 - 371   | 2426.21  | 2425.21   | 2425.23   | -0.02 | 1 AMDDAGLEKSQIHEIVLVGGSTR               |
| 349 - 371   | 2442.22  | 2441.21   | 2441.22   | -0.01 | 1 AMDDAGLEKSQIHEIVLVGGSTR Oxidation (M) |
| 375 - 386   | 1495.80  | 1494.80   | 1494.78   | 0.01  | 1 VQQLRDYFEGK                           |
| 391 - 418   | 2691.27  | 2690.27   | 2690.27   | 0.00  | 0 GVNPEAVAYGAAVQGSILSGEGGDETK           |
| 453 - 476   | 2819.38  | 2818.38   | 2818.38   | 0.00  | 1 KSQVFTTYDQQTTSIQVFEGER                |
| 484 - 498   | 1554.88  | 1553.88   | 1553.89   | -0.01 | 1 LLGKFDLSGIPAAPR                       |
| 488 - 498   | 1143.61  | 1142.60   | 1142.61   | -0.00 | 0 FDLSGIPAAPR                           |
| 539 - 546   | 989.49   | 988.49    | 988.48    | 0.01  | 0 LSQEIDR                               |
| 569 - 579   | 1402.63  | 1401.63   | 1401.66   | -0.03 | 0 NQLETYYVNMK                           |
| 569 - 579   | 1418.63  | 1417.63   | 1417.65   | -0.02 | 0 NQLETYYVNMK Oxidation (M)             |
| 626 - 643   | 2089.10  | 2088.09   | 2088.10   | -0.01 | 1 LKEVEAVCNPIISAVYQR                    |
| 628 - 643   | 1847.92  | 1846.92   | 1846.92   | -0.01 | 0 EVEAVCNPIISAVYQR                      |
| 644 - 665   | 2011.89  | 2010.89   | 2010.80   | 0.08  | 0 TGGAPGGGADGEGGVDDDEHDEL               |

# Spot 1400

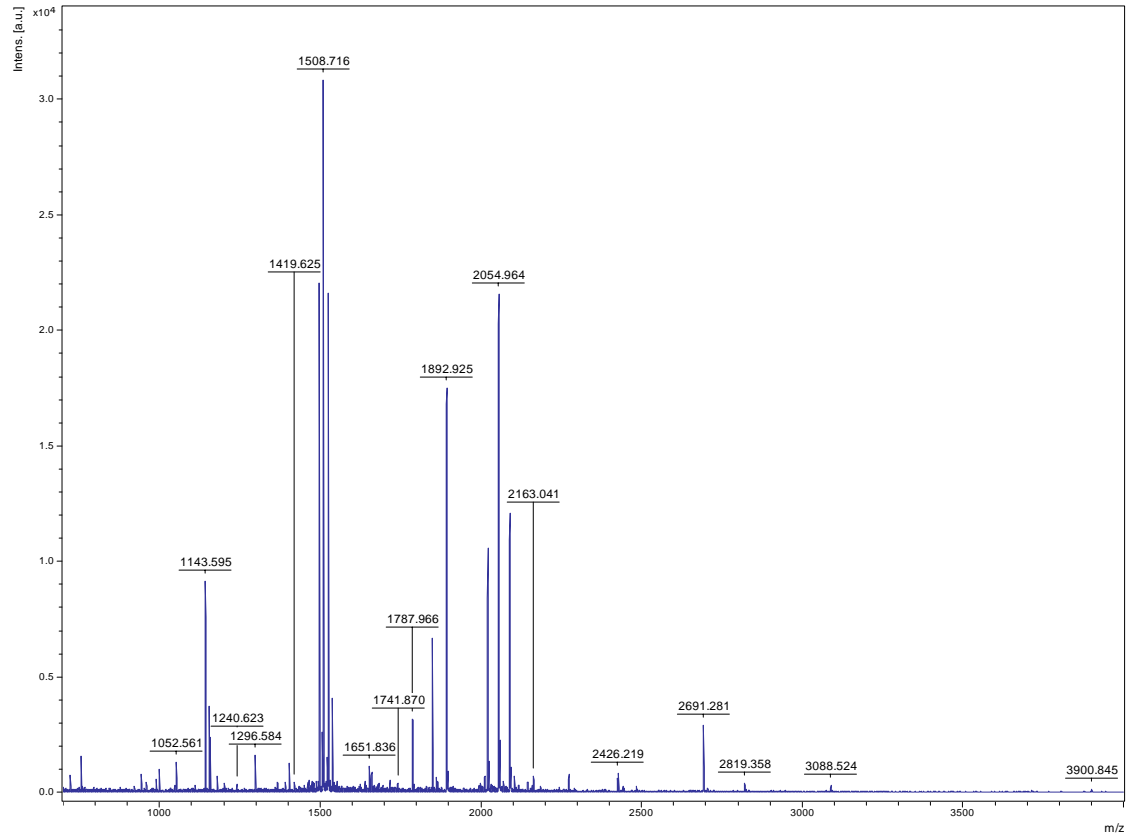

Match to: gj|41052822 Score: 304 Expect: 8.4e-26

## Matched peptides:

| Start - End | Observed  | Mr (expt) | Mr (calc) | Delta   | Miss Sequence                                |
|-------------|-----------|-----------|-----------|---------|----------------------------------------------|
| 52 - 65     | 1536.7428 | 1535.7355 | 1535.7440 | -0.0085 | 0 K.NGHVEIANDQGN.R.I                         |
| 66 - 78     | 1508.7164 | 1507.7092 | 1507.7307 | -0.0215 | 0 R.ITPSWVAFDTSER.L                          |
| 86 - 94     | 998.4786  | 997.4714  | 997.4941  | -0.0227 | 0 K.NQAAVNPER.T                              |
| 143 - 156   | 1506.7424 | 1505.7352 | 1505.7799 | -0.0447 | 0 K.VFSPPEEVSAMILGK.M                        |
| 157 - 167   | 1240.6230 | 1239.6158 | 1239.6169 | -0.0011 | 1 K.MKETAEAYLGK.K                            |
| 168 - 185   | 2021.0142 | 2020.0069 | 2020.0377 | -0.0308 | 1 K.KINDAVVTPAYFNDAGR.Q                      |
| 169 - 185   | 1892.9254 | 1891.9181 | 1891.9428 | -0.0246 | 0 K.INDAVVTPAYFNDAGR.Q                       |
| 190 - 201   | 1155.6263 | 1154.6191 | 1154.6407 | -0.0216 | 0 K.DAGVIAGLNVAR.I                           |
| 202 - 217   | 1659.8799 | 1658.8726 | 1658.8879 | -0.0153 | 0 R.IINEPTAAAIAYGLDK.K                       |
| 202 - 218   | 1787.9655 | 1786.9582 | 1786.9828 | -0.0247 | 1 R.IINEPTAAAIAYGLDK.K                       |
| 266 - 272   | 943.4786  | 942.4714  | 942.4884  | -0.0171 | 0 R.IMEYFIK.L                                |
| 266 - 272   | 959.4891  | 958.4819  | 958.4834  | -0.0015 | 0 R.IMEYFIK.L Oxidation (M)                  |
| 302 - 310   | 1052.5614 | 1051.5541 | 1051.5523 | 0.0019  | 0 R.ALSNQHQR.V                               |
| 302 - 328   | 3088.5239 | 3087.5167 | 3087.5261 | -0.0094 | 1 R.ALSNQHQRVEIESLFDGTFDFSEPLR.A             |
| 311 - 328   | 2054.9644 | 2053.9571 | 2053.9844 | -0.0273 | 0 R.VEIESLFDGTFDFSEPLR.A                     |
| 331 - 340   | 1296.5836 | 1295.5763 | 1295.6146 | -0.0382 | 0 R.FEELNNDLFR.K                             |
| 349 - 371   | 2426.2188 | 2425.2115 | 2425.2270 | -0.0156 | 1 K.AMDDAGLEKSQIHEIVLVGGSTR.I                |
| 349 - 371   | 2442.1826 | 2441.1753 | 2441.2220 | -0.0466 | 1 K.AMDDAGLEKSQIHEIVLVGGSTR.I Oxidation (M)  |
| 375 - 386   | 1495.7931 | 1494.7858 | 1494.7830 | 0.0028  | 1 K.VQQLLRDYFEGK.E                           |
| 391 - 418   | 2691.2815 | 2690.2742 | 2690.2670 | 0.0072  | 0 K.GVNPDEAVAYGAAVQGSILSGEGGDETK.D           |
| 453 - 476   | 2819.3579 | 2818.3506 | 2818.3773 | -0.0267 | 1 K.KSQVFTTYQDQQTTSIQVFEGE.R.S               |
| 488 - 498   | 1143.5950 | 1142.5877 | 1142.6084 | -0.0207 | 0 K.FDLSGIPAAPR.G                            |
| 537 - 546   | 1202.6057 | 1201.5984 | 1201.6051 | -0.0066 | 1 K.GRLSQEEIDR.M                             |
| 539 - 546   | 989.4940  | 988.4867  | 988.4825  | 0.0042  | 0 R.LSQEEIDR.M                               |
| 569 - 579   | 1402.6382 | 1401.6309 | 1401.6598 | -0.0289 | 0 R.NQLETYYVNMK.N                            |
| 606 - 625   | 2483.1001 | 2482.0928 | 2482.1023 | -0.0095 | 1 K.EALEWLDENQTAKEEYEEK.L                    |
| 626 - 643   | 2089.0950 | 2088.0877 | 2088.1037 | -0.0160 | 1 K.LKEVEAVCNPIISAVYQR.T Carbamidomethyl (C) |
| 628 - 643   | 1847.9100 | 1846.9028 | 1846.9247 | -0.0219 | 0 K.EVEAVCNPIISAVYQR.T Carbamidomethyl (C)   |
| 644 - 665   | 2011.7867 | 2010.7795 | 2010.8038 | -0.0243 | 0 R.TGGAPGGGADGEGGVDEHDEL.-                  |

## Spot 1401

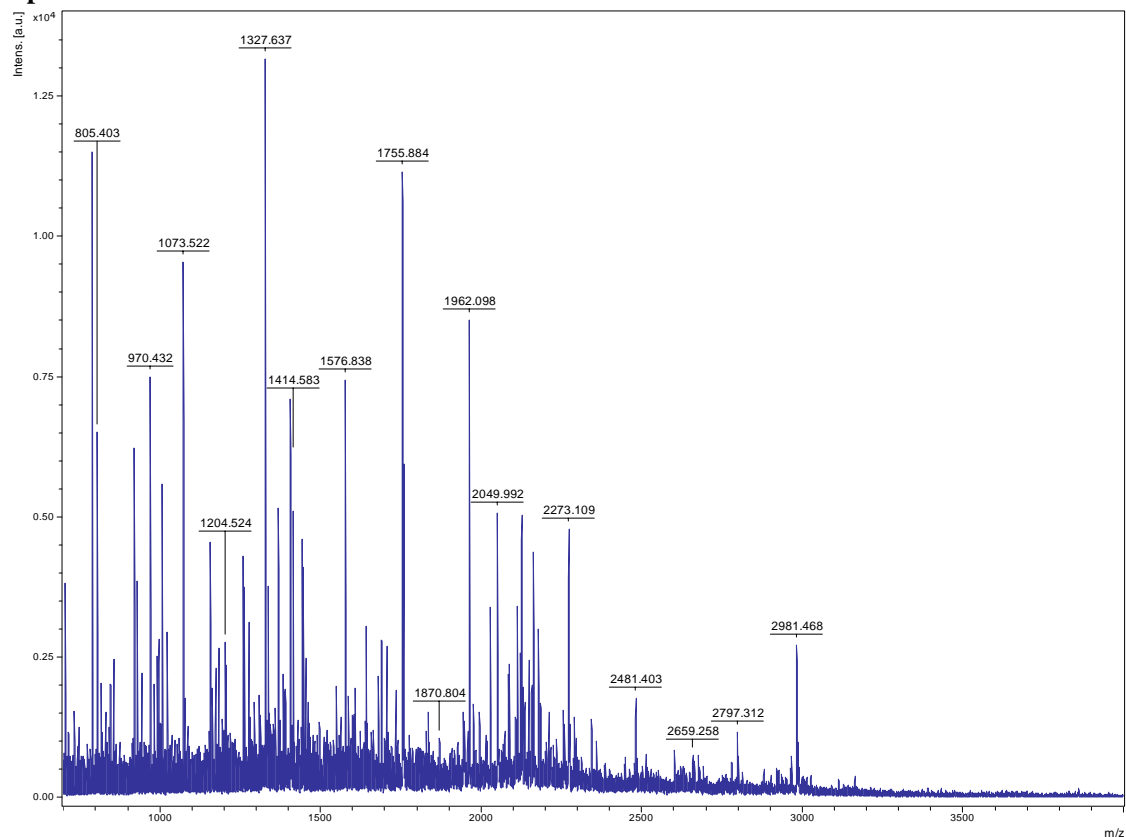

Match to: gi|27261082; Score: 140

### Matched peptides:

| Start - End | Observed | Mr (expt) | Mr (calc) | Delta | Miss Sequence           |
|-------------|----------|-----------|-----------|-------|-------------------------|
| 74 - 81     | 999.46   | 998.46    | 998.47    | -0.01 | 0 CRPGPEQR              |
| 82 - 100    | 2121.06  | 2120.06   | 2120.10   | -0.04 | 0 AEPLPTVEGSLFHDRPTVR   |
| 104 - 118   | 1758.85  | 1757.85   | 1757.89   | -0.04 | 0 LYFVSAHEQPPAPFR       |
| 171 - 180   | 1162.60  | 1161.60   | 1161.64   | -0.04 | 0 VLETEVAVFR            |
| 194 - 209   | 1870.80  | 1869.80   | 1869.87   | -0.07 | 0 GGWPTVHGEGETVFFHR     |
| 210 - 220   | 1337.57  | 1336.57   | 1336.62   | -0.05 | 0 VADDGWVSVFR           |
| 221 - 235   | 1585.73  | 1584.73   | 1584.76   | -0.03 | 0 VDVPETLEPTGGER        |
| 236 - 252   | 1835.92  | 1834.91   | 1834.96   | -0.05 | 1 RVTPPLHCFTPAAVGR      |
| 237 - 252   | 1679.81  | 1678.81   | 1678.86   | -0.05 | 0 VTTPPLHCFTPAAVGR      |
| 272 - 289   | 2148.99  | 2147.99   | 2148.04   | -0.05 | 0 HVLEFDLETESFPLTER     |
| 320 - 338   | 2028.01  | 2027.01   | 2027.07   | -0.06 | 0 GDSVVPYLQPVQSPVSSLR   |
| 420 - 439   | 2136.03  | 2135.03   | 2135.07   | -0.04 | 1 LEFDAAGELTTGRDEVAATLK |
| 432 - 439   | 846.42   | 845.41    | 845.45    | -0.03 | 0 DEVAATLK              |
| 440 - 459   | 2086.01  | 2085.01   | 2085.03   | -0.02 | 0 VLTRPEAGNDAFFAVSPCGK  |
| 460 - 467   | 1006.47  | 1005.47   | 1005.55   | -0.08 | 1 WVVFRSGR              |
| 472 - 492   | 2157.02  | 2156.02   | 2156.05   | -0.03 | 0 NLYIVDAAHGEDVAGEGTIR  |
| 543 - 556   | 1278.60  | 1277.60   | 1277.65   | -0.05 | 0 VHVAGPAGSAAADR        |
| 559 - 569   | 1331.56  | 1330.56   | 1330.61   | -0.05 | 0 INHVCFSPPDSR          |
| 602 - 609   | 816.44   | 815.44    | 815.45    | -0.01 | 0 LDGSLVLR              |

Match to: gi|55741328; Score: 125

| Start - End | Observed | Mr (expt) | Mr (calc) | Delta | Miss Sequence                      |
|-------------|----------|-----------|-----------|-------|------------------------------------|
| 41 - 56     | 1576.84  | 1575.84   | 1575.87   | -0.04 | 0 DGGSAQRPLAPAPLVK                 |
| 109 - 130   | 2481.40  | 2480.40   | 2480.21   | -0.19 | 1 TIFVASEQESEIMDVKEQAQAK           |
| 134 - 147   | 1454.71  | 1453.71   | 1453.75   | -0.04 | 0 SVVVFVTEASPYAK                   |
| 148 - 165   | 1755.88  | 1754.88   | 1754.93   | -0.05 | 0 SGGGLGDVCGSLPIALALR              |
| 169 - 175   | 831.45   | 830.45    | 830.45    | -0.00 | 0 VMVVMVPR                         |
| 169 - 175   | 847.44   | 846.44    | 846.45    | -0.01 | 0 VMVVMVPR Oxidation (M)           |
| 176 - 193   | 2111.99  | 2110.99   | 2110.98   | 0.01  | 1 YMNGALNKNFANAFYTEK Oxidation (M) |
| 184 - 193   | 1204.52  | 1203.52   | 1203.56   | -0.03 | 0 NFANAFYTEK                       |
| 197 - 213   | 2124.91  | 2123.91   | 2123.95   | -0.04 | 0 IPCFGEHEVTFHFHEYR                |
| 292 - 299   | 1073.52  | 1072.52   | 1072.55   | -0.03 | 0 YRPYGVYR                         |
| 366 - 393   | 2981.47  | 2980.47   | 2980.48   | -0.01 | 0 IVTVSQGYSWEVTTAEGGQGLNELLSSR     |
| 439 - 456   | 1962.10  | 1961.10   | 1961.15   | -0.05 | 0 ELGLPIRPDVPLIGFIGR               |
| 468 - 475   | 928.50   | 927.50    | 927.52    | -0.02 | 0 LAIPDLMR                         |
| 468 - 475   | 944.50   | 943.50    | 943.52    | -0.02 | 0 LAIPDLMR Oxidation (M)           |
| 476 - 495   | 2255.97  | 2254.97   | 2255.01   | -0.05 | 0 DNIQFVMLGSDGPFGEWWMR             |
| 507 - 518   | 1327.64  | 1326.63   | 1326.68   | -0.05 | 0 GWVGFVPSVSHR                     |
| 519 - 531   | 1446.70  | 1445.69   | 1445.74   | -0.04 | 0 ITAGCDILLMPSPR                   |
| 532 - 558   | 2964.41  | 2963.41   | 2963.44   | -0.03 | 0 FEPCGLNQLYAMQYGTVPVVHGTGGLR      |
| 587 - 592   | 805.40   | 804.40    | 804.43    | -0.03 | 0 MLWALR Oxidation (M)             |
| 593 - 599   | 841.40   | 840.40    | 840.42    | -0.02 | 0 MAISTYR                          |
| 600 - 610   | 1331.56  | 1330.56   | 1330.63   | -0.07 | 1 EHKSSWEGLMK                      |

Match to: gi|50878307; Score: 111

### Matched peptides:

| Start - End | Observed | Mr (expt) | Mr (calc) | Delta | Miss Sequence                              |
|-------------|----------|-----------|-----------|-------|--------------------------------------------|
| 13 - 20     | 831.45   | 830.45    | 830.41    | 0.04  | 1 ASGNNGRR                                 |
| 156 - 168   | 1406.80  | 1405.80   | 1405.84   | -0.04 | 0 LGDAPARLLLSVR                            |
| 203 - 209   | 921.38   | 920.38    | 920.40    | -0.02 | 0 FAYDSYR                                  |
| 203 - 210   | 1077.49  | 1076.48   | 1076.50   | -0.02 | 1 FAYDSYRR                                 |
| 277 - 293   | 1943.95  | 1942.95   | 1943.03   | -0.08 | 0 QLQLAVLAVFNSWDSR                         |
| 308 - 333   | 2659.26  | 2658.26   | 2658.29   | -0.03 | 0 GTAVNVQTMVFGNMGNTSGTGVLFTR               |
| 308 - 333   | 2675.25  | 2674.25   | 2674.28   | -0.03 | 0 GTAVNVQTMVFGNMGNTSGTGVLFTR Oxidation (M) |

|           |         |         |         |       |   |                                    |
|-----------|---------|---------|---------|-------|---|------------------------------------|
| 341 - 360 | 2178.11 | 2177.11 | 2177.15 | -0.04 | 1 | KLYGEFLVNAQGEDVVAGIR               |
| 342 - 360 | 2049.99 | 2048.99 | 2049.05 | -0.06 | 0 | LYGEFLVNAQGEDVVAGIR                |
| 392 - 404 | 1641.68 | 1640.68 | 1640.72 | -0.04 | 0 | EMMDIEFTVQENR                      |
| 405 - 411 | 1006.47 | 1005.47 | 1005.49 | -0.02 | 0 | LWMLQCR                            |
| 405 - 411 | 1022.47 | 1021.47 | 1021.48 | -0.02 | 0 | LWMLQCR Oxidation (M)              |
| 423 - 435 | 1444.71 | 1443.70 | 1443.74 | -0.04 | 0 | IADVMEVNEGLVER                     |
| 423 - 435 | 1460.70 | 1459.70 | 1459.73 | -0.04 | 0 | IADVMEVNEGLVER Oxidation (M)       |
| 441 - 464 | 2779.31 | 2778.31 | 2778.34 | -0.03 | 1 | MVEPGHLDQLLHPQFENPSGYKDK           |
| 503 - 523 | 2111.99 | 2110.99 | 2111.03 | -0.04 | 0 | TETSPEDVGGMHAAVGLTAR               |
| 503 - 523 | 2127.98 | 2126.98 | 2127.03 | -0.05 | 0 | TETSPEDVGGMHAAVGLTAR Oxidation (M) |
| 625 - 635 | 1174.53 | 1173.53 | 1173.56 | -0.03 | 0 | QNGAEGIGLCR                        |
| 636 - 646 | 1369.54 | 1368.54 | 1368.58 | -0.04 | 0 | TEHMFASDER                         |
| 636 - 646 | 1385.56 | 1384.56 | 1384.57 | -0.01 | 0 | TEHMFASDER Oxidation (M)           |
| 652 - 662 | 1294.60 | 1293.60 | 1293.64 | -0.04 | 0 | QMIMASLELR Oxidation (M)           |
| 652 - 662 | 1310.63 | 1309.63 | 1309.64 | -0.01 | 0 | QMIMASLELR 2 Oxidation (M)         |
| 675 - 682 | 970.43  | 969.43  | 969.46  | -0.03 | 0 | SDFEGIFR                           |
| 683 - 692 | 1072.53 | 1071.53 | 1071.57 | -0.05 | 0 | AMDGLPVTIR                         |
| 683 - 692 | 1088.55 | 1087.55 | 1087.57 | -0.02 | 0 | AMDGLPVTIR Oxidation (M)           |
| 693 - 712 | 2343.15 | 2342.15 | 2342.17 | -0.02 | 0 | LLDPLHEFLPEGHVEDMVR                |
| 713 - 728 | 1734.78 | 1733.77 | 1733.79 | -0.01 | 0 | ELCSETGAAQDDVLAR                   |
| 732 - 742 | 1262.60 | 1261.60 | 1261.65 | -0.05 | 0 | LSEVNPMLGFR                        |
| 732 - 742 | 1278.60 | 1277.60 | 1277.64 | -0.04 | 0 | LSEVNPMLGFR Oxidation (M)          |
| 746 - 759 | 1607.74 | 1606.74 | 1606.80 | -0.06 | 0 | LGISYPELTEMQAR                     |
| 804 - 815 | 1359.65 | 1358.65 | 1358.69 | -0.05 | 1 | VFTDMGKTIGYK                       |

## Spot 1403

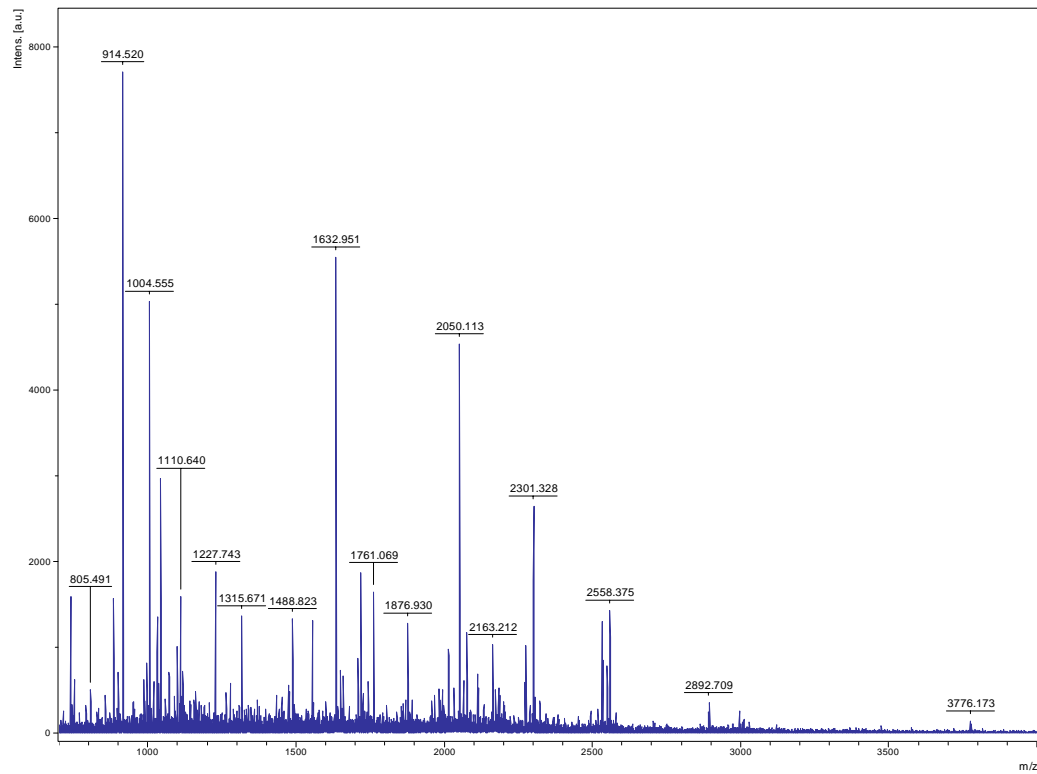

Match to: gi17981609 Score: 297 Expect: 1.1e-25

### Matched peptides:

| Start - End | Observed  | Mr (expt) | Mr (calc) | Delta  | Miss Sequence                                |
|-------------|-----------|-----------|-----------|--------|----------------------------------------------|
| 10 - 25     | 1632.9514 | 1631.9441 | 1631.8267 | 0.1174 | 0 K.ATTPFDGQKPGTSGLR.K                       |
| 10 - 26     | 1761.0691 | 1760.0618 | 1759.9216 | 0.1402 | 1 K.ATTPFDGQKPGTSGLRK.K                      |
| 70 - 85     | 1658.0153 | 1657.0080 | 1656.8981 | 0.1099 | 1 K.DAVQIITKMAAANGVR.R                       |
| 78 - 85     | 805.4906  | 804.4833  | 804.3912  | 0.0922 | 0 K.MAAANGVR.R Oxidation (M)                 |
| 86 - 105    | 2171.3477 | 2170.3404 | 2170.1680 | 0.1724 | 1 R.RVWVGQNSLMSTPAVSAVIRE                    |
| 86 - 105    | 2187.3267 | 2186.3194 | 2186.1629 | 0.1565 | 1 R.RVWVGQNSLMSTPAVSAVIRE Oxidation (M)      |
| 87 - 105    | 2015.2288 | 2014.2215 | 2014.0669 | 0.1546 | 0 R.VWVGQNSLMSTPAVSAVIRE                     |
| 115 - 137   | 2301.3281 | 2300.3208 | 2300.1436 | 0.1772 | 0 K.ATGAFILTASHNPGGPTEDFGIK.Y                |
| 138 - 153   | 1708.8563 | 1707.8490 | 1707.7410 | 0.1081 | 0 K.YNMENGGPAPESVTDKI                        |
| 207 - 215   | 1099.6448 | 1098.6375 | 1098.5597 | 0.0778 | 0 K.TIFDFESIK.K                              |
| 207 - 216   | 1227.7433 | 1226.7360 | 1226.6546 | 0.0814 | 1 K.TIFDFESIK.L                              |
| 223 - 240   | 2050.1128 | 2049.1055 | 2048.9414 | 0.1641 | 0 K.FTFCYDALHGVAGTYATR.I Carbamidomethyl (C) |
| 241 - 259   | 2076.2139 | 2075.2066 | 2075.0608 | 0.1458 | 0 R.IFVEELGAAESSLLNCVPE Carbamidomethyl (C)  |
| 260 - 275   | 1717.9203 | 1716.9130 | 1716.7743 | 0.1387 | 0 K.EDFGGGHPDNLTYAKE                         |
| 286 - 304   | 1876.9296 | 1875.9223 | 1875.7870 | 0.1352 | 0 K.SSNAEPPEFGAADDGADR.N                     |
| 362 - 370   | 1110.6404 | 1109.6331 | 1109.5545 | 0.0786 | 0 K.FFEVPTGKWF                               |
| 418 - 433   | 1743.0333 | 1742.0260 | 1741.9210 | 0.1051 | 1 K.DNLGGDKLVTVEDIVR.Q                       |
| 425 - 433   | 1043.6927 | 1042.6855 | 1042.6022 | 0.0833 | 0 K.LVTVEDIVR.Q                              |
| 434 - 441   | 987.5173  | 986.5100  | 986.4359  | 0.0741 | 0 R.QHWGTYGR.H Pyro-glu (N-term Q)           |
| 434 - 441   | 1004.5551 | 1003.5478 | 1003.4624 | 0.0854 | 0 R.QHWGTYGR.H                               |
| 447 - 458   | 1315.6705 | 1314.6633 | 1314.5728 | 0.0905 | 0 R.YDYENVDAAGAAKE                           |
| 483 - 506   | 2558.3750 | 2557.3677 | 2557.1707 | 0.1970 | 1 R.SDVSDVVAADFEYKDPVDGVSVK.H                |
| 512 - 519   | 914.5196  | 913.5123  | 913.4293  | 0.0830 | 0 R.YLFGDGSR.L                               |
| 524 - 535   | 1118.6978 | 1117.6905 | 1117.6091 | 0.0814 | 0 R.LSGTGSVGTATIR.V                          |
| 536 - 543   | 1071.6217 | 1070.6144 | 1070.5284 | 0.0860 | 0 R.VYIEQYEK.D                               |
| 536 - 547   | 1488.8232 | 1487.8160 | 1487.7143 | 0.1016 | 1 R.VYIEQYEKSSK.T                            |
| 551 - 565   | 1554.9380 | 1553.9307 | 1553.8300 | 0.1007 | 0 R.DSQDALPLVDVALK.L                         |
| 569 - 575   | 884.4803  | 883.4731  | 883.3858  | 0.0873 | 0 K.MQEYTR.S                                 |
| 569 - 575   | 900.4612  | 899.4539  | 899.3807  | 0.0732 | 0 K.MQEYTR.S Oxidation (M)                   |

## Spot 1405

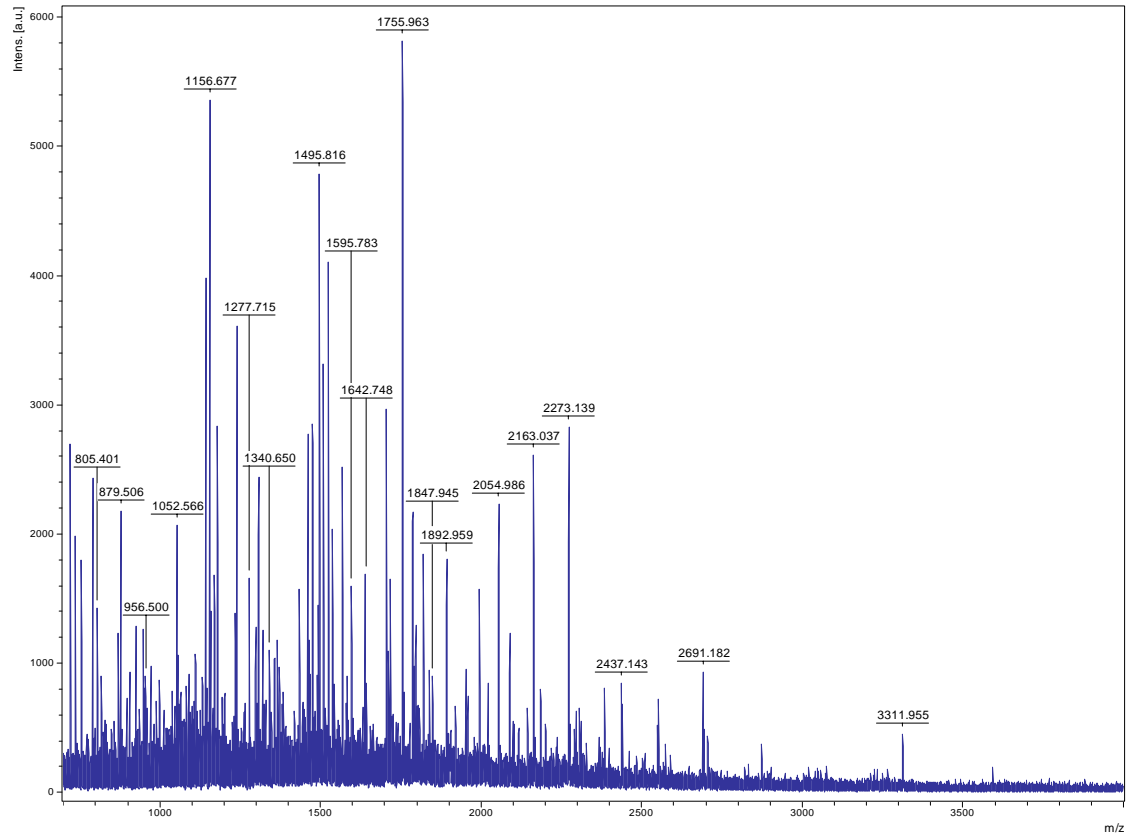

Match to: *gj|2267006* Score: 67 Expect: 0.012

### Matched peptides:

| Start - End | Observed  | Mr (expt) | Mr (calc) | Delta   | Miss Sequence                               |
|-------------|-----------|-----------|-----------|---------|---------------------------------------------|
| 32 - 51     | 2101.1355 | 2100.1282 | 2100.0812 | 0.0470  | 0 K.LGTVIGIDLGTYSYCVGVYK.N Acetyl (N-term)  |
| 52 - 65     | 1536.7662 | 1535.7589 | 1535.7440 | 0.0149  | 0 K.NGHVEIANDQGNR.I                         |
| 66 - 78     | 1508.7673 | 1507.7600 | 1507.7307 | 0.0293  | 0 R.ITPSWVAFTDSER.L                         |
| 86 - 94     | 998.4262  | 997.4189  | 997.4941  | -0.0751 | 0 K.NQAAVNPER.T                             |
| 168 - 185   | 2021.0755 | 2020.0682 | 2020.0377 | 0.0305  | 1 K.KINDAVVTVPAYFNDAQR.Q                    |
| 169 - 185   | 1892.9882 | 1891.9809 | 1891.9428 | 0.0382  | 0 K.INDAVVTVPAYFNDAQR.Q                     |
| 190 - 201   | 1197.5958 | 1196.5885 | 1196.6513 | -0.0627 | 0 K.DAGVIAGLNVAR.I Acetyl (N-term)          |
| 302 - 310   | 1052.5195 | 1051.5122 | 1051.5523 | -0.0400 | 0 R.ALSNQHQVR.V                             |
| 302 - 310   | 1094.4888 | 1093.4815 | 1093.5628 | -0.0813 | 0 R.ALSNQHQVR.V Acetyl (N-term)             |
| 311 - 328   | 2055.0237 | 2054.0164 | 2053.9844 | 0.0321  | 0 R.VEIESLFDGTFDFSEPLTR.A                   |
| 331 - 340   | 1296.6384 | 1295.6311 | 1295.6146 | 0.0166  | 0 R.FEELNNDLFR.K                            |
| 331 - 341   | 1466.7819 | 1465.7746 | 1465.7201 | 0.0545  | 1 R.FEELNNDLFR.K Acetyl (N-term)            |
| 349 - 357   | 949.4380  | 948.4307  | 948.4222  | 0.0085  | 0 K.AMDDAGLEK.S                             |
| 358 - 371   | 1495.8433 | 1494.8360 | 1494.8154 | 0.0206  | 0 K.SQIHEIVLVGGSTRI                         |
| 381 - 390   | 1226.5498 | 1225.5425 | 1225.5615 | -0.0189 | 1 R.DYFEGKEPNK.G                            |
| 391 - 418   | 2691.2558 | 2690.2485 | 2690.2670 | -0.0185 | 0 K.GVNPDEAVYGAAVQGSILSGEGGDETK.D           |
| 488 - 498   | 1143.5880 | 1142.5807 | 1142.6084 | -0.0276 | 0 K.FDLSGIPAAPR.G                           |
| 626 - 643   | 2089.1373 | 2088.1300 | 2088.1037 | 0.0263  | 1 K.LKVEAVCNPIISAVYQR.T Carbamidomethyl (C) |
| 628 - 643   | 1847.9637 | 1846.9564 | 1846.9247 | 0.0318  | 0 K.EVEAVCNPIISAVYQR.T Carbamidomethyl (C)  |
| 656 - 663   | 1027.5141 | 1026.5068 | 1026.4142 | 0.0927  | 0 R.LDDEHDEL.- Acetyl (N-term)              |



## Spot 1407

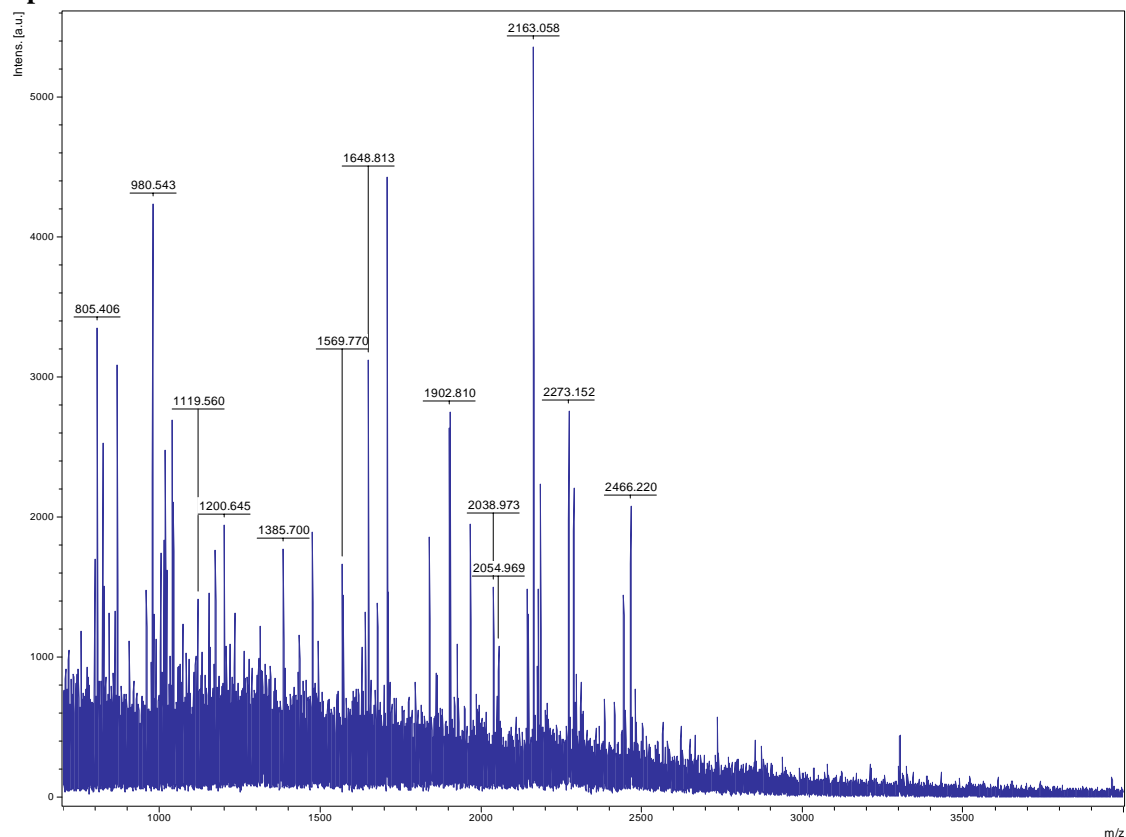

Match to: gi|38346454; Score: 122

### Matched peptides:

| Start - End | Observed | Mr (expt) | Mr (calc) | Delta | Miss Sequence                        |
|-------------|----------|-----------|-----------|-------|--------------------------------------|
| 1 - 16      | 1648.81  | 1647.81   | 1647.77   | 0.04  | 0 MAVGEECAAAVASQVR                   |
| 393 - 401   | 1020.49  | 1019.49   | 1019.53   | -0.04 | 0 FVDEAQLAK                          |
| 453 - 460   | 959.51   | 958.51    | 958.50    | 0.01  | 0 QMVQALNR                           |
| 489 - 496   | 980.54   | 979.54    | 979.55    | -0.01 | 0 IVPGYLLR                           |
| 574 - 591   | 2145.04  | 2144.04   | 2144.03   | 0.01  | 1 IYLYGEGWDFGEVAQNKR                 |
| 592 - 611   | 2038.97  | 2037.97   | 2037.95   | 0.02  | 0 GINASQINMSGTGIGSFNDR               |
| 592 - 611   | 2054.97  | 2053.97   | 2053.95   | 0.02  | 0 GINASQINMSGTGIGSFNDR Oxidation (M) |
| 652 - 669   | 1927.02  | 1926.01   | 1926.02   | -0.01 | 0 ELATYADHIQIAGLNK                   |
| 723 - 732   | 1072.58  | 1071.57   | 1071.58   | -0.01 | 0 TPIGLSIDEK                         |
| 795 - 807   | 1678.87  | 1677.87   | 1677.86   | 0.01  | 1 DKNEENWHLIKPR                      |
| 797 - 807   | 1435.74  | 1434.74   | 1434.74   | 0.01  | 0 NEENWHLIKPR                        |
| 808 - 817   | 1200.65  | 1199.64   | 1199.67   | -0.02 | 0 LENPSFRPLK                         |
| 835 - 841   | 869.44   | 868.44    | 868.44    | -0.00 | 0 YSSPLFR                            |
| 842 - 851   | 1119.56  | 1118.56   | 1118.56   | 0.00  | 0 LSTASDIEQR                         |
| 852 - 871   | 2185.04  | 2184.04   | 2184.15   | -0.11 | 1 VRFHNTGPSMVPGVIVMSIK Oxidation (M) |
| 944 - 953   | 1174.65  | 1173.65   | 1173.66   | -0.01 | 1 RTTAVFVQPR                         |
| 945 - 953   | 1018.54  | 1017.54   | 1017.56   | -0.02 | 0 TTAVFVQPR                          |

Match to: gi|37535166; Score: 78

### Matched peptides:

| Start - End | Observed | Mr (expt) | Mr (calc) | Delta | Miss Sequence            |
|-------------|----------|-----------|-----------|-------|--------------------------|
| 43 - 49     | 843.50   | 842.50    | 842.52    | -0.02 | 0 TILELVR                |
| 50 - 64     | 1902.81  | 1901.81   | 1901.78   | 0.03  | 0 SYDGDHICYDHFVFR        |
| 75 - 88     | 1648.81  | 1647.81   | 1647.79   | 0.02  | 0 SLAEFFTFDGYVPR         |
| 75 - 92     | 2176.10  | 2175.10   | 2175.06   | 0.03  | 1 SLAEFFTFDGYVPREELR     |
| 100 - 122   | 2466.22  | 2465.22   | 2465.20   | 0.02  | 0 ALWFSPPTNDGYTGTGVYGPLR |
| 265 - 272   | 1014.49  | 1013.49   | 1013.48   | 0.01  | 0 SYIEFAER               |
| 265 - 279   | 1839.93  | 1838.93   | 1838.99   | -0.07 | 1 SYIEFAERLVLQPK         |
| 293 - 314   | 2443.15  | 2442.15   | 2442.13   | 0.02  | 1 DGFEVGNADKIFESTSNDQLTR |

## Spot 1408

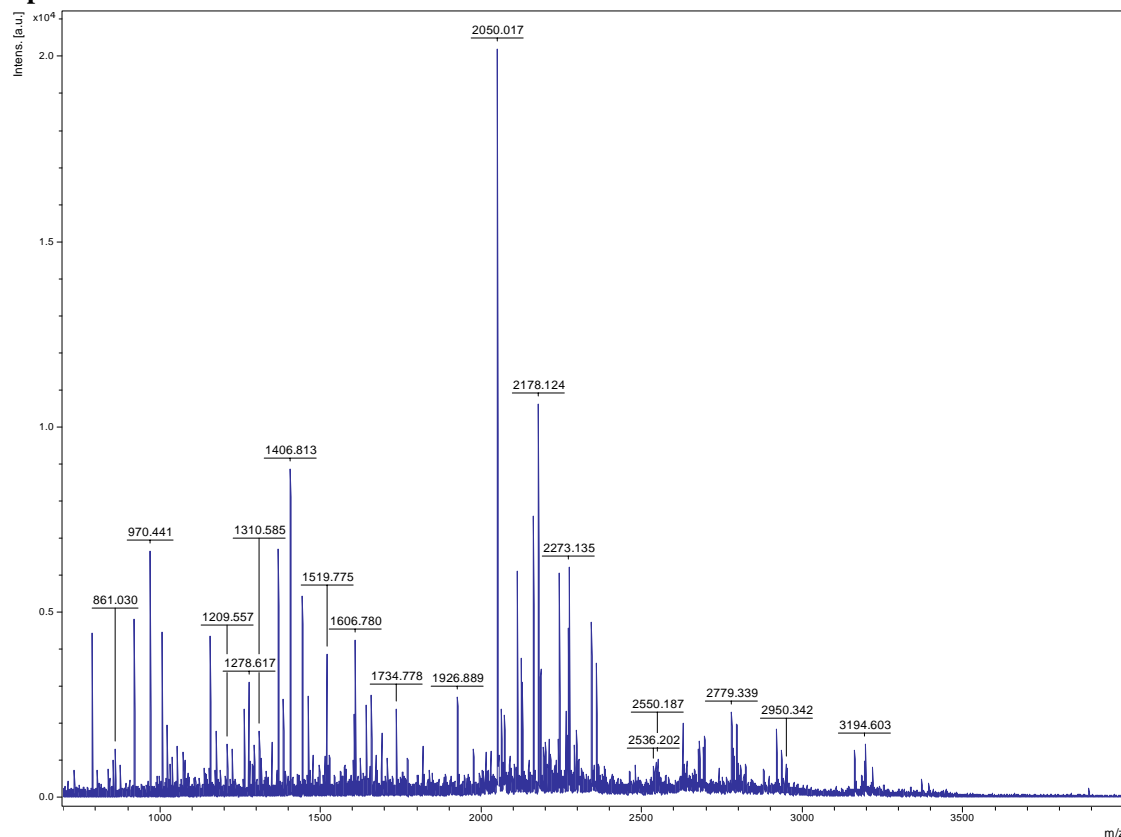

Match to: gi|50878307; Score: 205

### Matched peptides:

| Start - End | Observed | Mr (expt) | Mr (calc) | Delta | Miss Sequence                                 |
|-------------|----------|-----------|-----------|-------|-----------------------------------------------|
| 156 - 168   | 1406.81  | 1405.81   | 1405.84   | -0.03 | 0 LGDPARPLLSVR                                |
| 203 - 209   | 921.39   | 920.39    | 920.40    | -0.02 | 0 FAYDSYR                                     |
| 203 - 210   | 1077.49  | 1076.49   | 1076.50   | -0.01 | 1 FAYDSYRR                                    |
| 239 - 252   | 1513.70  | 1512.70   | 1512.74   | -0.05 | 0 GLHNDTDLTATDLK                              |
| 276 - 293   | 2072.03  | 2071.03   | 2071.12   | -0.09 | 1 KQLQLAVLAVFNSWSDSPR                         |
| 277 - 293   | 1926.89  | 1925.89   | 1926.00   | -0.11 | 0 QLQLAVLAVFNSWSDSPR Pyro-glu (N-term Q)      |
| 308 - 333   | 2691.27  | 2690.26   | 2690.28   | -0.02 | 0 GTA VNVQTMVFGNMGNTSGTGVLFTR 2 Oxidation (M) |
| 341 - 360   | 2178.12  | 2177.12   | 2177.15   | -0.03 | 1 KLYGEFLVNAQGEDVVAGIR                        |
| 342 - 360   | 2050.02  | 2049.01   | 2049.05   | -0.04 | 0 LYGEFLVNAQGEDVVAGIR                         |
| 361 - 384   | 2918.25  | 2917.25   | 2917.26   | -0.00 | 1 TPEDLDAMRDHMPEPYEELVENCK                    |
| 361 - 384   | 2934.27  | 2933.26   | 2933.25   | 0.01  | 1 TPEDLDAMRDHMPEPYEELVENCK Oxidation (M)      |
| 361 - 384   | 2950.34  | 2949.34   | 2949.25   | 0.09  | 1 TPEDLDAMRDHMPEPYEELVENCK 2 Oxidation (M)    |
| 385 - 404   | 2544.14  | 2543.14   | 2543.17   | -0.02 | 1 ILESHYKEMMDIEFTVQENR 2 Oxidation (M)        |
| 392 - 404   | 1641.70  | 1640.70   | 1640.72   | -0.02 | 0 EMMDIEFTVQENR                               |
| 392 - 404   | 1673.71  | 1672.71   | 1672.71   | 0.01  | 0 EMMDIEFTVQENR 2 Oxidation (M)               |
| 405 - 411   | 1006.48  | 1005.47   | 1005.49   | -0.01 | 0 LWMLQCR                                     |
| 405 - 411   | 1022.47  | 1021.47   | 1021.48   | -0.02 | 0 LWMLQCR Oxidation (M)                       |
| 405 - 414   | 1292.64  | 1291.64   | 1291.65   | -0.02 | 1 LWMLQCRGTGK                                 |
| 423 - 435   | 1444.72  | 1443.72   | 1443.74   | -0.02 | 0 IAVDMVNEGLVER                               |
| 423 - 435   | 1460.71  | 1459.71   | 1459.73   | -0.03 | 0 IAVDMVNEGLVER Oxidation (M)                 |
| 441 - 462   | 2536.20  | 2535.20   | 2535.22   | -0.02 | 0 MVEPGHLDQLLHPQFENPSGYK                      |
| 441 - 464   | 2779.34  | 2778.34   | 2778.34   | -0.01 | 1 MVEPGHLDQLLHPQFENPSGYKDK                    |
| 441 - 464   | 2795.33  | 2794.33   | 2794.34   | -0.01 | 1 MVEPGHLDQLLHPQFENPSGYKDK Oxidation (M)      |
| 465 - 496   | 3162.62  | 3161.61   | 3161.61   | -0.00 | 0 VIATGLPASPAAVGVQIVFTAEDA EAWHAQGK           |
| 497 - 523   | 2823.31  | 2822.31   | 2822.46   | -0.15 | 1 DVILVRTTETSPEDVGGMHA AVGILTAR Oxidation (M) |
| 503 - 523   | 2112.00  | 2111.00   | 2111.03   | -0.03 | 0 TETSPEDVGGMHA AVGILTAR                      |
| 503 - 523   | 2128.00  | 2127.00   | 2127.03   | -0.02 | 0 TETSPEDVGGMHA AVGILTAR Oxidation (M)        |
| 625 - 635   | 1174.54  | 1173.54   | 1173.56   | -0.02 | 0 QNGAEGIGLCR                                 |
| 636 - 646   | 1369.56  | 1368.55   | 1368.58   | -0.02 | 0 TEHMFFASDER                                 |
| 636 - 646   | 1385.55  | 1384.55   | 1384.57   | -0.02 | 0 TEHMFFASDER Oxidation (M)                   |
| 652 - 662   | 1261.60  | 1260.59   | 1260.62   | -0.03 | 0 QMIMASSLELR Pyro-glu (N-term Q)             |
| 652 - 662   | 1294.62  | 1293.62   | 1293.64   | -0.02 | 0 QMIMASSLELR Oxidation (M)                   |
| 652 - 662   | 1310.59  | 1309.58   | 1309.64   | -0.05 | 0 QMIMASSLELR 2 Oxidation (M)                 |
| 675 - 682   | 970.44   | 969.44    | 969.46    | -0.02 | 0 SDFEGIFR                                    |
| 683 - 692   | 1072.56  | 1071.56   | 1071.57   | -0.02 | 0 AMDGLPVTIR                                  |
| 693 - 712   | 2343.16  | 2342.16   | 2342.17   | -0.02 | 0 LLDPPLHEFLPEGHVEDMVR                        |
| 693 - 712   | 2359.17  | 2358.17   | 2358.17   | -0.00 | 0 LLDPPLHEFLPEGHVEDMVR Oxidation (M)          |
| 713 - 728   | 1734.78  | 1733.78   | 1733.79   | -0.01 | 0 ELCSETGAAQDDVLAR                            |
| 732 - 742   | 1262.62  | 1261.62   | 1261.65   | -0.03 | 0 LSEVNPMLGFR                                 |
| 732 - 742   | 1278.62  | 1277.61   | 1277.64   | -0.03 | 0 LSEVNPMLGFR Oxidation (M)                   |
| 746 - 759   | 1623.77  | 1622.77   | 1622.80   | -0.03 | 0 LGISYPELTEMQAR Oxidation (M)                |
| 861 - 882   | 2628.35  | 2627.34   | 2627.37   | -0.03 | 0 FLPIYLSQGILQHDPPFVLDQR                      |

Match to: gi|51964146; Score: 119

### Matched peptides:

| Start - End | Observed | Mr (expt) | Mr (calc) | Delta | Miss Sequence               |
|-------------|----------|-----------|-----------|-------|-----------------------------|
| 15 - 24     | 1077.49  | 1076.49   | 1076.57   | -0.08 | 1 VRDGGIGFTR                |
| 76 - 86     | 1476.66  | 1475.66   | 1475.67   | -0.01 | 1 QKYCESIYETR               |
| 92 - 107    | 1691.84  | 1690.84   | 1690.88   | -0.05 | 0 TVMVGVPPLGSDHPFR          |
| 118 - 128   | 1292.64  | 1291.64   | 1291.64   | -0.01 | 1 DVAKTVEEVMR Oxidation (M) |
| 161 - 179   | 2124.12  | 2123.11   | 2123.15   | -0.04 | 0 NYNIPLVADIHFAPTVALR       |
| 180 - 188   | 1137.54  | 1136.54   | 1136.56   | -0.03 | 1 VAECFDKIR                 |
| 199 - 220   | 2785.25  | 2784.25   | 2784.28   | -0.02 | 1 AQFEQLEYTEDDYQKELEHIEK    |
| 259 - 269   | 1209.56  | 1208.55   | 1208.59   | -0.03 | 0 GMVESALEFAR               |

|           |         |         |         |       |   |                                     |
|-----------|---------|---------|---------|-------|---|-------------------------------------|
| 273 - 284 | 1528.69 | 1527.69 | 1527.75 | -0.06 | 1 | KLDFHNFVFSMK Oxidation (M)          |
| 285 - 296 | 1348.67 | 1347.67 | 1347.70 | -0.03 | 0 | ASNPPVMVQAYR                        |
| 328 - 345 | 1818.92 | 1817.92 | 1817.96 | -0.03 | 0 | SAIGIGTLLMDGLGDTIR Oxidation (M)    |
| 346 - 360 | 1770.79 | 1769.78 | 1769.81 | -0.03 | 0 | VSLTEPPEEIDPCR                      |
| 346 - 361 | 1926.89 | 1925.89 | 1925.92 | -0.03 | 1 | VSLTEPPEEIDPCR                      |
| 386 - 391 | 875.39  | 874.39  | 874.40  | -0.01 | 0 | YDFQQR                              |
| 428 - 434 | 861.47  | 860.47  | 860.48  | -0.00 | 0 | APELLYR                             |
| 459 - 469 | 1224.57 | 1223.57 | 1223.61 | -0.05 | 0 | ELPPVEDAQAR                         |
| 520 - 537 | 2063.06 | 2062.05 | 2062.09 | -0.04 | 1 | LAVTLRGDESYEQLDLLK                  |
| 627 - 637 | 1310.59 | 1309.58 | 1309.61 | -0.03 | 0 | DTSFNLLQGCR                         |
| 643 - 653 | 1315.54 | 1314.54 | 1314.53 | 0.01  | 0 | TEYVSCPCGR                          |
| 654 - 666 | 1519.78 | 1518.77 | 1518.80 | -0.03 | 0 | TLFDLQEVSAQIR                       |
| 712 - 732 | 2243.10 | 2242.10 | 2242.24 | -0.14 | 1 | TVVQRGIAMEGATDALIQLIK Oxidation (M) |
| 737 - 744 | 970.44  | 969.44  | 969.44  | -0.01 | 0 | WVDPPEE                             |

## Spot 1411

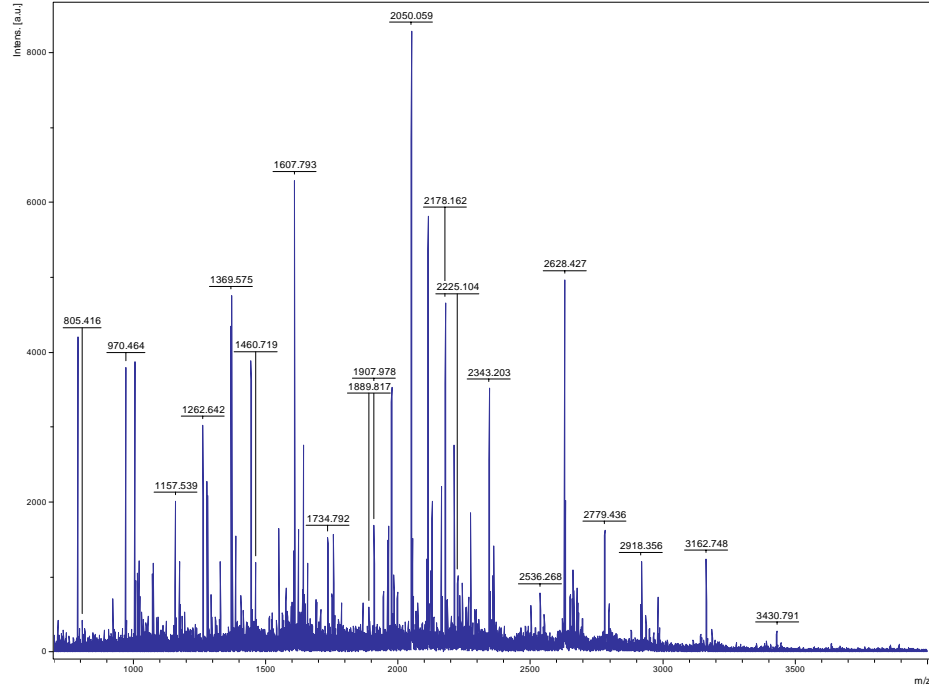

## Match to: gi|50878307 Score: 156

| Start - End | Observed  | Mr (expt) | Mr (calc) | ppm | Miss Sequence                                  |
|-------------|-----------|-----------|-----------|-----|------------------------------------------------|
| 60 - 66     | 921.4184  | 920.4112  | 920.4028  | 9   | 0 R.FAYDSYR.R                                  |
| 134 - 150   | 1944.0150 | 1943.0077 | 1943.0265 | -10 | 0 K.QQLAVLAVFNWSDSPR.A                         |
| 165 - 190   | 2659.3700 | 2658.3627 | 2658.2895 | 28  | 0 K.GTAVNVQTMVFGNMGNTSGTGVLFTR.N               |
| 165 - 190   | 2675.3808 | 2674.3735 | 2674.2844 | 33  | 0 K.GTAVNVQTMVFGNMGNTSGTGVLFTR.N Oxidation (M) |
| 198 - 217   | 2178.1620 | 2177.1548 | 2177.1481 | 3   | 1 K.KLYGEFLVNAQGEDVVAGIR.T                     |
| 199 - 217   | 2050.0588 | 2049.0516 | 2049.0531 | -1  | 0 K.LYGEFLVNAQGEDVVAGIR.T                      |
| 218 - 241   | 2918.3563 | 2917.3490 | 2917.2568 | 32  | 1 R.TPELDLAMDHMPPEYELVENCK.I                   |
| 227 - 241   | 1889.8169 | 1888.8097 | 1888.7971 | 7   | 0 R.DHMPPEYELVENCK.I                           |
| 249 - 261   | 1641.7202 | 1640.7130 | 1640.7174 | -3  | 0 K.EMMDIEFTVQENR.L                            |
| 249 - 261   | 1657.7210 | 1656.7137 | 1656.7123 | 1   | 0 K.EMMDIEFTVQENR.L Oxidation (M)              |
| 262 - 268   | 1006.5018 | 1005.4945 | 1005.4888 | 6   | 0 R.LWMLQCR.T                                  |
| 262 - 268   | 1022.4906 | 1021.4833 | 1021.4837 | -0  | 0 R.LWMLQCR.T Oxidation (M)                    |
| 280 - 292   | 1444.7326 | 1443.7253 | 1443.7392 | -10 | 0 K.IAVDMVNEGLVER.R                            |
| 280 - 292   | 1460.7189 | 1459.7117 | 1459.7341 | -15 | 0 K.IAVDMVNEGLVER.R Oxidation (M)              |
| 298 - 319   | 2536.2682 | 2535.2609 | 2535.2216 | 16  | 0 K.MVEPGHLDQLLPQFENPSGYKDK.V                  |
| 298 - 321   | 2779.4364 | 2778.4291 | 2778.3435 | 31  | 1 K.MVEPGHLDQLLPQFENPSGYKDK.V                  |
| 298 - 321   | 2795.4087 | 2794.4014 | 2794.3385 | 23  | 1 K.MVEPGHLDQLLPQFENPSGYKDK.V Oxidation (M)    |
| 322 - 353   | 3162.7481 | 3161.7408 | 3161.6146 | 40  | 0 K.VIATGLPASPGAAVGQIVFTAEDAEAWHAQGGK.D        |
| 360 - 380   | 2112.0457 | 2111.0385 | 2111.0317 | 3   | 0 R.TETSPEDVGGMHAAVVGILTAR.G                   |
| 360 - 380   | 2128.0307 | 2127.0235 | 2127.0266 | -1  | 0 R.TETSPEDVGGMHAAVVGILTAR.G Oxidation (M)     |
| 381 - 392   | 1156.5847 | 1155.5774 | 1155.5819 | -4  | 0 R.GGMTSHAAVAVARG                             |
| 397 - 406   | 1171.4784 | 1170.4711 | 1170.4580 | 11  | 0 K.CCVSGCSSVR.V                               |
| 397 - 412   | 1785.9160 | 1784.9087 | 1784.7604 | 83  | 1 K.CCVSGCSSVRVNDASK.I                         |
| 441 - 463   | 2647.3006 | 2646.2934 | 2646.2458 | 18  | 0 K.QPLCPPALSGDLETFMSWVDEVR.K                  |
| 441 - 463   | 2663.3170 | 2662.3097 | 2662.2407 | 26  | 0 K.QPLCPPALSGDLETFMSWVDEVR.K Oxidation (M)    |
| 482 - 492   | 1157.5395 | 1156.5322 | 1156.5295 | 2   | 0 R.QNGAEGIGLCR.T Gln->pyro-Glu (N-term Q)     |
| 482 - 492   | 1174.5511 | 1173.5438 | 1173.5560 | -10 | 0 R.QNGAEGIGLCR.T                              |
| 493 - 503   | 1369.5751 | 1368.5678 | 1368.5768 | -7  | 0 R.TEHMFFASDER.I                              |
| 493 - 503   | 1385.5720 | 1384.5647 | 1384.5718 | -5  | 0 R.TEHMFFASDER.I Oxidation (M)                |
| 509 - 519   | 1294.6266 | 1293.6193 | 1293.6421 | -18 | 0 R.QMIMASSLELR.Q Oxidation (M)                |
| 532 - 539   | 970.4644  | 969.4571  | 969.4556  | 2   | 0 R.SDFEIGFR.A                                 |
| 540 - 549   | 1072.5754 | 1071.5682 | 1071.5747 | -6  | 0 R.AMDGLPVTIR.L                               |
| 550 - 569   | 2343.2028 | 2342.1955 | 2342.1729 | 10  | 0 R.LLDPLPHEFLPEGHVDMVR.E                      |
| 550 - 569   | 2359.1996 | 2358.1924 | 2358.1678 | 10  | 0 R.LLDPLPHEFLPEGHVDMVR.E Oxidation (M)        |
| 570 - 585   | 1734.7920 | 1733.7848 | 1733.7890 | -2  | 0 R.ELCSETGAQQDVLAR.V                          |
| 589 - 599   | 1262.6421 | 1261.6349 | 1261.6489 | -11 | 0 K.LSEVNPMLGFR.G                              |
| 589 - 599   | 1278.6358 | 1277.6286 | 1277.6438 | -12 | 0 K.LSEVNPMLGFR.G Oxidation (M)                |
| 600 - 616   | 1996.9729 | 1995.9657 | 1995.9506 | 8   | 1 R.GCRLGISYPELTEMQAR.A Oxidation (M)          |
| 603 - 616   | 1607.7930 | 1606.7857 | 1606.8025 | -10 | 0 R.LGISYPELTEMQAR.A                           |
| 603 - 616   | 1623.7810 | 1622.7737 | 1622.7974 | -15 | 0 R.LGISYPELTEMQAR.A Oxidation (M)             |
| 673 - 681   | 1015.5533 | 1014.5461 | 1014.5532 | -7  | 0 K.VGTMIPIR.A                                 |
| 673 - 681   | 1031.5458 | 1030.5386 | 1030.5481 | -9  | 0 K.VGTMIPIR.A Oxidation (M)                   |
| 718 - 739   | 2628.4271 | 2627.4199 | 2627.3748 | 17  | 0 K.FLPIYLSQGIHQDPPEVLDQR.G                    |
| 761 - 779   | 1974.9678 | 1973.9605 | 1973.9669 | -3  | 0 K.VGICGEHGGEPLSVAFFAK.A                      |
| 780 - 791   | 1371.6220 | 1370.6147 | 1370.6289 | -10 | 0 K.AGLDYVSCSPFR.V                             |
| 780 - 796   | 1907.9782 | 1906.9710 | 1906.9724 | -1  | 1 K.AGLDYVSCSPFRVPIAR.L                        |

## Spot 1412

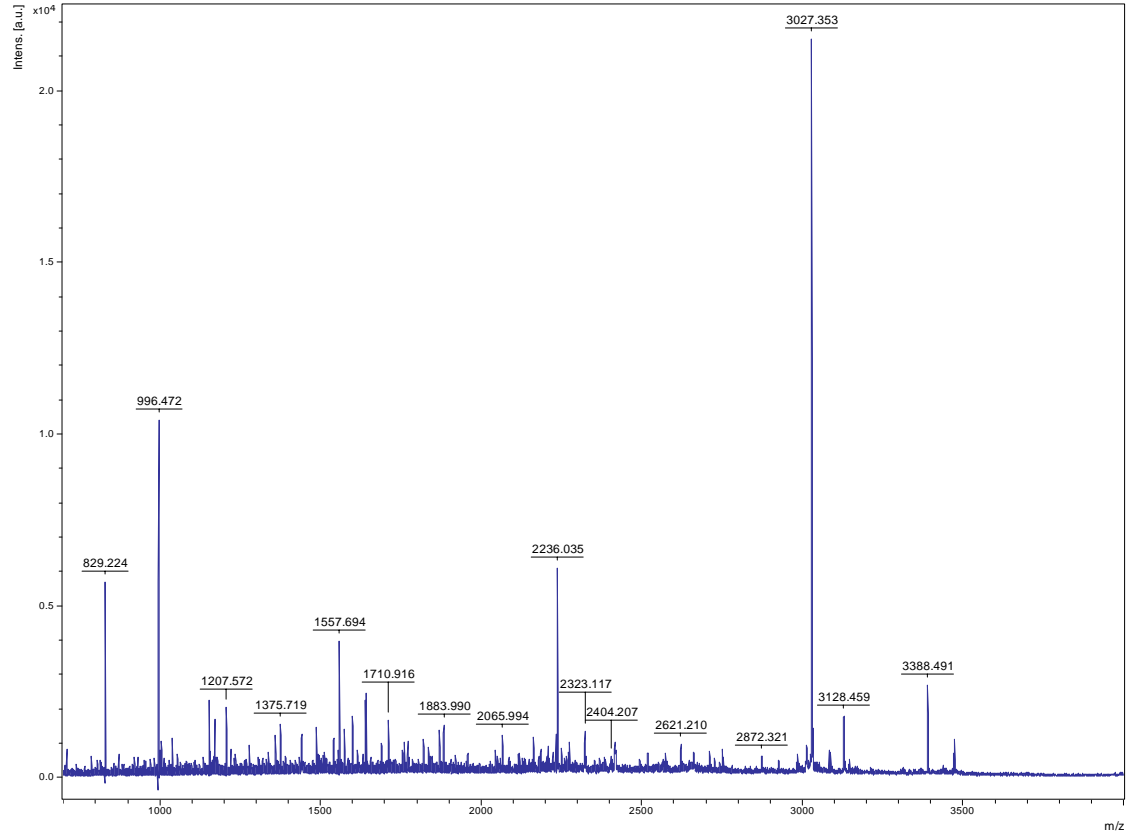

Match to: gi|55775372 Score: 75

### Matched peptides:

| Start - End | Observed  | Mr (expt) | Mr (calc) | ppm | Miss Sequence                             |
|-------------|-----------|-----------|-----------|-----|-------------------------------------------|
| 21 - 27     | 996.4722  | 995.4649  | 995.4613  | 4   | 0 K.NPYWFNR.D                             |
| 21 - 29     | 1267.6637 | 1266.6564 | 1266.5894 | 53  | 1 K.NPYWFNRDR.F                           |
| 68 - 102    | 3471.6061 | 3470.5988 | 3470.7682 | -49 | 0 K.TPGHPENFETPGVEVTTGPLGQGIANAVGLALAEK.H |
| 149 - 175   | 3027.3530 | 3026.3458 | 3026.4145 | -23 | 0 K.LIAFYDDNHISIDGDTETIAFTEDVSAR.F        |
| 188 - 197   | 1152.4897 | 1151.4824 | 1151.4843 | -2  | 0 K.NGNDGYDEIR.A                          |
| 227 - 240   | 1391.6962 | 1390.6889 | 1390.6841 | 3   | 0 K.ANSYVHGSALGTE                         |
| 241 - 263   | 2751.2862 | 2750.2790 | 2750.3228 | -16 | 1 K.EVEATRENLGWPYEPFFVPEDVK.S             |
| 247 - 263   | 2065.9941 | 2064.9868 | 2064.9833 | 2   | 0 R.ENLGWPYEPFFVPEDVK.S                   |
| 300 - 316   | 1710.9158 | 1709.9085 | 1709.8988 | 6   | 0 K.SIVSGELPAGWADALPK.Y                   |
| 317 - 327   | 1207.5722 | 1206.5649 | 1206.5517 | 11  | 0 K.YTPESPADATR.N                         |
| 328 - 339   | 1359.7033 | 1358.6960 | 1358.6976 | -1  | 0 R.NLSQQCLNALAK.V                        |
| 340 - 360   | 2059.0861 | 2058.0789 | 2058.1031 | -12 | 0 K.VVPGLLGGADLASSNMTLLK.M Oxidation (M)  |
| 455 - 475   | 2233.1045 | 2232.0972 | 2232.1031 | -3  | 0 R.AMPNILMLRPADGNETAGAYK.I               |
| 494 - 507   | 1441.7868 | 1440.7795 | 1440.7824 | -2  | 0 K.LAQLPGTSIEGVEK.G                      |
| 508 - 537   | 3128.4588 | 3127.4515 | 3127.5383 | -28 | 0 K.GGYIVSDNSTGNKPDFIVMSTGSEIVAK.A        |
| 551 - 568   | 2236.0352 | 2235.0279 | 2235.0194 | 4   | 0 R.VVSFVCWELFDEQSAEYK.E                  |
| 551 - 579   | 3388.4915 | 3387.4842 | 3387.6333 | -44 | 1 R.VVSFVCWELFDEQSAEYKESVLP EAVTAR.V      |
| 569 - 579   | 1171.6381 | 1170.6309 | 1170.6244 | 5   | 0 K.ESVLP EAVTAR.V                        |
| 615 - 631   | 1883.9905 | 1882.9832 | 1882.9676 | 8   | 0 K.IYQEYGIT AENVIATAK.S                  |

### Spot 1429

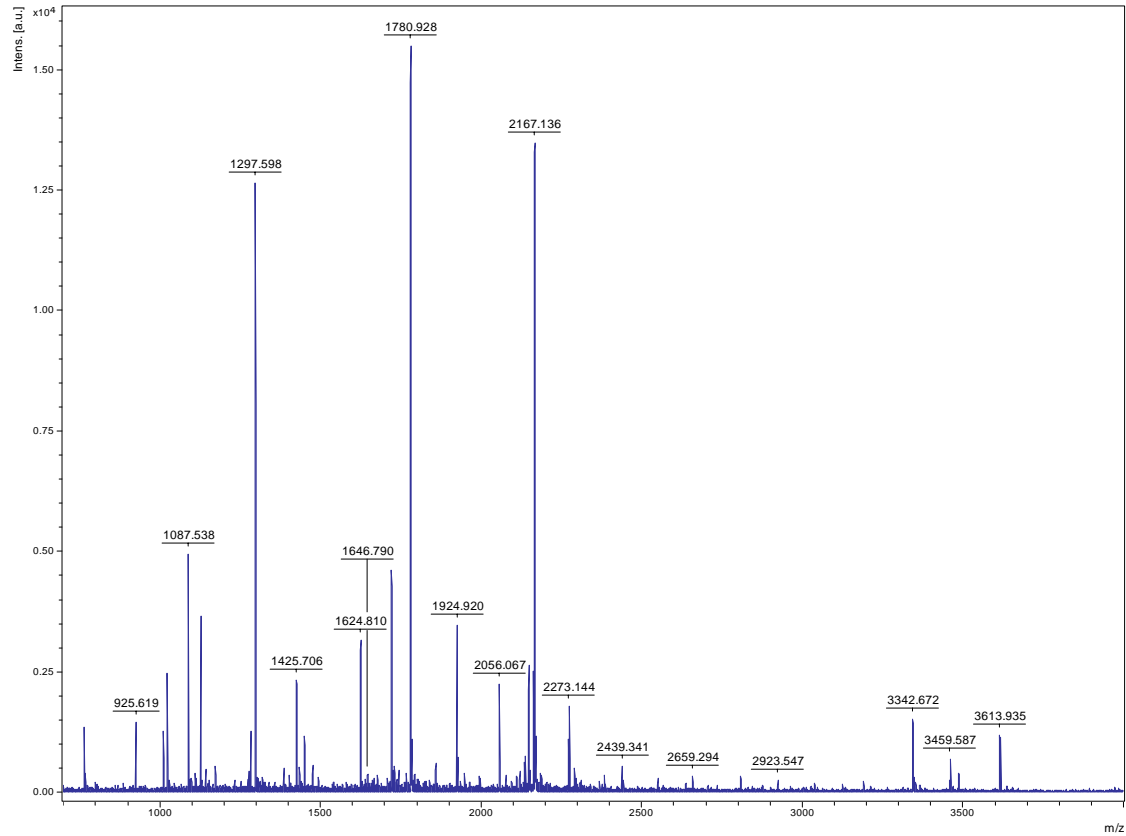

Match to: gi|51535304 Score: 348 Expect: 2.1e-29

#### Matched peptides:

| Start - End | Observed  | Mr (expt) | Mr (calc) | Delta   | Miss Sequence                           |
|-------------|-----------|-----------|-----------|---------|-----------------------------------------|
| 131 - 160   | 3342.6716 | 3341.6644 | 3341.6707 | -0.0063 | 1 K.VDATETDLDLAKYDVQGFPTLFFIDGVPK.D     |
| 143 - 160   | 2056.0667 | 2055.0594 | 2055.0716 | -0.0123 | 0 K.YDVQGFPTLFFIDGVPK.D                 |
| 169 - 178   | 1173.6552 | 1172.6479 | 1172.6553 | -0.0074 | 1 K.EAIVSWVKK.L                         |
| 195 - 223   | 2923.5474 | 2922.5401 | 2922.5297 | 0.0103  | 1 K.ILTGEDKAILAVLDSLGSAGHSDEIAAASRL     |
| 202 - 223   | 2167.1355 | 2166.1282 | 2166.1280 | 0.0002  | 0 K.AILAVLDSLGSAGHSDEIAAASRL            |
| 224 - 240   | 1924.9200 | 1923.9128 | 1923.9214 | -0.0086 | 0 R.LEDAINFYQTSNPDVAK.L                 |
| 241 - 249   | 1011.5546 | 1010.5473 | 1010.5549 | -0.0076 | 0 K.LFHLDPAAK.R                         |
| 250 - 257   | 925.6193  | 924.6120  | 924.6120  | 0.0000  | 0 K.RPSLVLLK.K                          |
| 259 - 272   | 1730.8350 | 1729.8277 | 1729.8199 | 0.0078  | 1 K.QEEELKTFYDGPFA.A                    |
| 264 - 272   | 1087.5380 | 1086.5307 | 1086.5386 | -0.0079 | 0 K.LTFYDGPFA.A                         |
| 273 - 305   | 3485.8262 | 3484.8189 | 3484.8453 | -0.0264 | 1 K.ASAIADFVSANKLPLVNTLTQETAPSIFDNPIK.K |
| 285 - 306   | 2439.3406 | 2438.3333 | 2438.3420 | -0.0087 | 1 K.LPLVNTLTQETAPSIFDNPIK.Q             |
| 335 - 342   | 1022.6003 | 1021.5930 | 1021.5960 | -0.0030 | 0 K.LLFVVER.D                           |
| 343 - 374   | 3459.5874 | 3458.5801 | 3458.5749 | 0.0053  | 0 R.DNEEVGEPVANYFGITQETTFLAYTGNEAR.N    |
| 375 - 388   | 1624.8099 | 1623.8027 | 1623.8144 | -0.0117 | 0 R.NFFLDGEISVENIK.R                    |
| 375 - 389   | 1780.9277 | 1779.9205 | 1779.9155 | 0.0050  | 1 R.NFFLDGEISVENIKR.F                   |
| 389 - 398   | 1283.6082 | 1282.6009 | 1282.6193 | -0.0184 | 1 K.RFAEDFLEEK.L                        |
| 390 - 398   | 1127.5142 | 1126.5069 | 1126.5182 | -0.0113 | 0 R.FAEDFLEEK.L                         |
| 399 - 417   | 2136.0339 | 2135.0267 | 2135.0422 | -0.0155 | 1 K.LTPFYKSEPVESNEGDVK.I                |
| 405 - 417   | 1386.6282 | 1385.6209 | 1385.6310 | -0.0101 | 0 K.SEPVPESENEGDVK.I                    |
| 472 - 481   | 1143.4675 | 1142.4603 | 1142.4774 | -0.0172 | 0 K.MDGTANEHPR.A Oxidation (M)          |
| 482 - 497   | 1721.9221 | 1720.9148 | 1720.9188 | -0.0039 | 0 R.AKPDGFPITLFPAGK.K                   |
| 498 - 509   | 1425.7057 | 1424.6984 | 1424.6935 | 0.0049  | 1 K.KSFEPITFEGDR.T                      |
| 499 - 509   | 1297.5979 | 1296.5906 | 1296.5986 | -0.0080 | 0 K.SFEPITFEGDR.T                       |
| 499 - 516   | 2148.0354 | 2147.0281 | 2147.0244 | 0.0037  | 1 K.SFEPITFEGDRTVVEMYK.F                |
| 538 - 550   | 1450.7084 | 1449.7011 | 1449.7059 | -0.0048 | 1 K.TEKDQSTASTNLR.G                     |
| 541 - 550   | 1092.5237 | 1091.5164 | 1091.5207 | -0.0043 | 0 K.DQSTASTNLR.G                        |

# Spot 1439

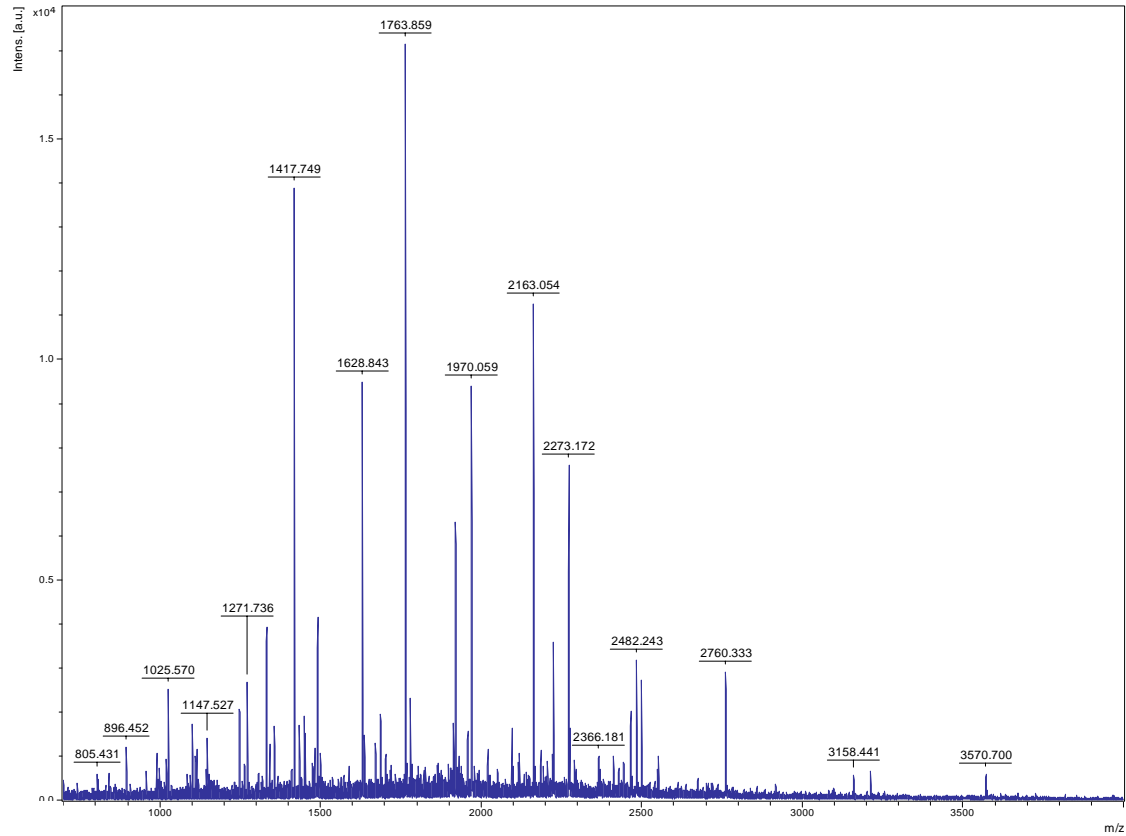

Match to: gi|50901676 Score: 116 Expect: 1.7e-07

## Matched peptides:

| Start - End | Observed  | Mr (expt) | Mr (calc) | Delta   | Miss Sequence                                   |
|-------------|-----------|-----------|-----------|---------|-------------------------------------------------|
| 30 - 45     | 1670.8570 | 1669.8497 | 1669.8973 | -0.0476 | 0 R.HMFGVVGIPVTSLASR.A                          |
| 30 - 45     | 1686.8691 | 1685.8618 | 1685.8922 | -0.0304 | 0 R.HMFGVVGIPVTSLASR.A Oxidation (M)            |
| 119 - 135   | 1920.9681 | 1919.9608 | 1919.9992 | -0.0384 | 0 R.GDFQELDQIAATKPFIK.I                         |
| 220 - 230   | 1271.7514 | 1270.7441 | 1270.7509 | -0.0068 | 1 R.RAERPLVVFGK.G                               |
| 221 - 230   | 1115.6499 | 1114.6426 | 1114.6498 | -0.0072 | 0 R.AERPLVVFGK.G                                |
| 244 - 259   | 1702.8744 | 1701.8671 | 1701.9011 | -0.0340 | 0 K.LVDTTGIPFLTPMGK.G Oxidation (M)             |
| 275 - 290   | 1571.7603 | 1570.7530 | 1570.8500 | -0.0970 | 0 R.SLAIGQCDVALVVGAR.L                          |
| 275 - 290   | 1628.8433 | 1627.8360 | 1627.8715 | -0.0355 | 0 R.SLAIGQCDVALVVGAR.L Carbamidomethyl (C)      |
| 291 - 302   | 1450.7594 | 1449.7521 | 1449.7768 | -0.0247 | 0 R.LNWLHFGEPPK.W                               |
| 309 - 322   | 1763.8527 | 1762.8454 | 1762.8811 | -0.0356 | 0 K.FILVDVCEEIELR.K Carbamidomethyl (C)         |
| 323 - 333   | 1120.6165 | 1119.6092 | 1119.6400 | -0.0308 | 0 R.KPHVGVGDAK.R                                |
| 342 - 362   | 2466.1556 | 2465.1483 | 2465.2413 | -0.0929 | 1 R.EIKDQPFCLAPSHPWVEAITK.K Carbamidomethyl (C) |
| 345 - 362   | 2095.9737 | 2094.9664 | 2095.0197 | -0.0532 | 0 K.DQPFCLAPSHPWVEAITK.K Carbamidomethyl (C)    |
| 345 - 363   | 2224.0859 | 2223.0786 | 2223.1146 | -0.0360 | 1 K.DQPFCLAPSHPWVEAITKK.A Carbamidomethyl (C)   |
| 378 - 389   | 1417.7665 | 1416.7592 | 1416.7765 | -0.0173 | 0 K.DVVPFNFLTPLR.I                              |
| 393 - 417   | 2482.1484 | 2481.1411 | 2481.2168 | -0.0757 | 0 R.DAILAEGNPAPVVVSEGANTMDVGR.A                 |
| 393 - 417   | 2498.1323 | 2497.1250 | 2497.2118 | -0.0867 | 0 R.DAILAEGNPAPVVVSEGANTMDVGR.A Oxidation (M)   |
| 418 - 426   | 1025.5628 | 1024.5555 | 1024.5665 | -0.0110 | 0 R.AVLVQNEPR.T                                 |
| 455 - 477   | 2428.1252 | 2427.1179 | 2427.1991 | -0.0811 | 0 R.LVVAVEGDSGFGFSAMEVETLVR.Y Oxidation (M)     |
| 499 - 524   | 2760.2014 | 2759.1941 | 2759.3078 | -0.1137 | 1 R.SPDEITGPYKDDPAPTSFVPAAGYHK.M                |
| 533 - 543   | 1263.6411 | 1262.6338 | 1262.6394 | -0.0056 | 0 K.GYLVEPDELK.S                                |
| 544 - 551   | 896.4262  | 895.4189  | 895.4399  | -0.0210 | 0 K.SALSSEFR.A                                  |
| 554 - 572   | 1970.0345 | 1969.0272 | 1969.0632 | -0.0360 | 0 R.KPAVINIIDPYAGAESGR.M                        |

### Spot 1446

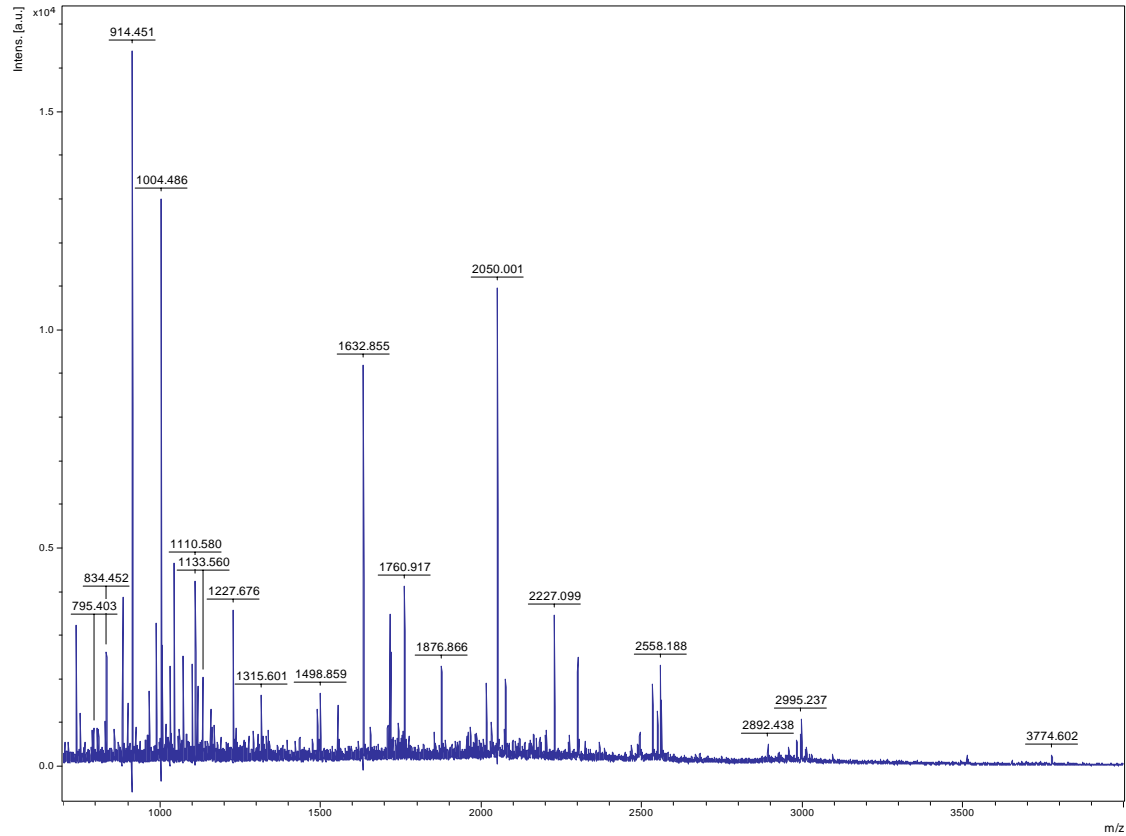

Match to: gi|50918261 Score: 207 Expect: 1.3e-16

#### Matched peptides:

| Start - End | Observed  | Mr (expt) | Mr (calc) | Delta   | Miss Sequence                                                                           |
|-------------|-----------|-----------|-----------|---------|-----------------------------------------------------------------------------------------|
| 1 - 9       | 1110.6317 | 1109.6244 | 1109.6154 | 0.0090  | 1 -.MVLFSVTKK.A Acetyl (N-term); Oxidation (M)                                          |
| 10 - 25     | 1632.9206 | 1631.9133 | 1631.8267 | 0.0866  | 0 K.ATTPFDGQKPGTSGLR.K                                                                  |
| 10 - 26     | 1761.0033 | 1759.9960 | 1759.9216 | 0.0744  | 1 K.ATTPFDGQKPGTSGLRK.K                                                                 |
| 78 - 86     | 987.5061  | 986.4988  | 986.5079  | -0.0091 | 1 K.MAAANGVRR.V Acetyl (N-term)                                                         |
| 87 - 105    | 2015.1309 | 2014.1236 | 2014.0669 | 0.0567  | 0 R.VWVQGNSLMSTPAVSAVIRE                                                                |
| 87 - 105    | 2031.1096 | 2030.1023 | 2030.0618 | 0.0405  | 0 R.VWVQGNSLMSTPAVSAVIRE Oxidation (M)                                                  |
| 115 - 137   | 2301.1919 | 2300.1846 | 2300.1436 | 0.0410  | 0 K.ATGAFILTASHNPGPTDFGIK.Y                                                             |
| 207 - 215   | 1099.6401 | 1098.6328 | 1098.5597 | 0.0731  | 0 K.TIFDFESIK.K                                                                         |
| 207 - 216   | 1227.7425 | 1226.7352 | 1226.6546 | 0.0806  | 1 K.TIFDFESIK.L                                                                         |
| 223 - 240   | 1993.0266 | 1992.0193 | 1991.9199 | 0.0994  | 0 K.FTFICYDALHGVAGTYATR.I                                                               |
| 223 - 240   | 2050.0160 | 2049.0087 | 2048.9414 | 0.0673  | 0 K.FTFICYDALHGVAGTYATR.I Carbamidomethyl (C)                                           |
| 241 - 259   | 2076.1102 | 2075.1029 | 2075.0608 | 0.0421  | 0 R.IFVEELGAAESSLLNCVPE Carbamidomethyl (C)                                             |
| 260 - 275   | 1717.8656 | 1716.8583 | 1716.7743 | 0.0840  | 0 K.EDFGGHPDPNLTLYAKE                                                                   |
| 276 - 285   | 1133.6190 | 1132.6117 | 1132.5910 | 0.0207  | 1 K.ELVDRMGLGK.S Oxidation (M)                                                          |
| 286 - 304   | 1876.8729 | 1875.8656 | 1875.7870 | 0.0786  | 0 K.SSNAEPPEFGAAADGDADR.N                                                               |
| 286 - 310   | 2533.1636 | 2532.1563 | 2532.1550 | 0.0013  | 1 K.SSNAEPPEFGAAADGDADRNMILGK.R                                                         |
| 286 - 310   | 2549.1478 | 2548.1405 | 2548.1499 | -0.0094 | 1 K.SSNAEPPEFGAAADGDADRNMILGK.R Oxidation (M)                                           |
| 371 - 397   | 2995.1588 | 2994.1515 | 2994.2404 | -0.0889 | 0 K.FFGNLM DAGMCSICGEESFGTSDHIR.E 2 Carbamidomethyl (C)                                 |
| 371 - 397   | 3012.2595 | 3011.2522 | 3011.2193 | 0.0329  | 0 K.FFGNLM DAGMCSICGEESFGTSDHIR.E Acetyl (N-term); Carbamidomethyl (C); 2 Oxidation (M) |
| 418 - 433   | 1743.0126 | 1742.0053 | 1741.9210 | 0.0844  | 1 K.DNLGGDKLVTVEDIVR.Q                                                                  |
| 425 - 433   | 1043.6797 | 1042.6724 | 1042.6022 | 0.0702  | 0 K.LLTVEDIVR.Q                                                                         |
| 434 - 441   | 1004.5355 | 1003.5282 | 1003.4624 | 0.0658  | 0 R.QHWGTYGR.H                                                                          |
| 442 - 446   | 739.3509  | 738.3436  | 738.3449  | -0.0013 | 0 R.HYYTR.Y                                                                             |
| 447 - 458   | 1315.6704 | 1314.6631 | 1314.5728 | 0.0904  | 0 R.YDYENV DAGA.AK.E                                                                    |
| 483 - 506   | 2558.1609 | 2557.1536 | 2557.1707 | -0.0171 | 1 R.SDVSDVVA.ADEFYKDPDVGVS.K.H                                                          |
| 512 - 519   | 914.4780  | 913.4707  | 913.4293  | 0.0414  | 0 R.YLFGDGSRL                                                                           |
| 524 - 535   | 1118.6745 | 1117.6672 | 1117.6091 | 0.0581  | 0 R.LSGTGSV.GATIR.V                                                                     |
| 536 - 547   | 1488.8062 | 1487.7989 | 1487.7143 | 0.0846  | 1 R.VYIEQYK.DSSK.T                                                                      |
| 551 - 565   | 1554.9032 | 1553.8959 | 1553.8300 | 0.0659  | 0 R.DSQDALAPLVDV.ALK.L                                                                  |
| 569 - 575   | 884.4081  | 883.4008  | 883.3858  | 0.0151  | 0 K.MQEY.TGR.S                                                                          |

# Spot 1449

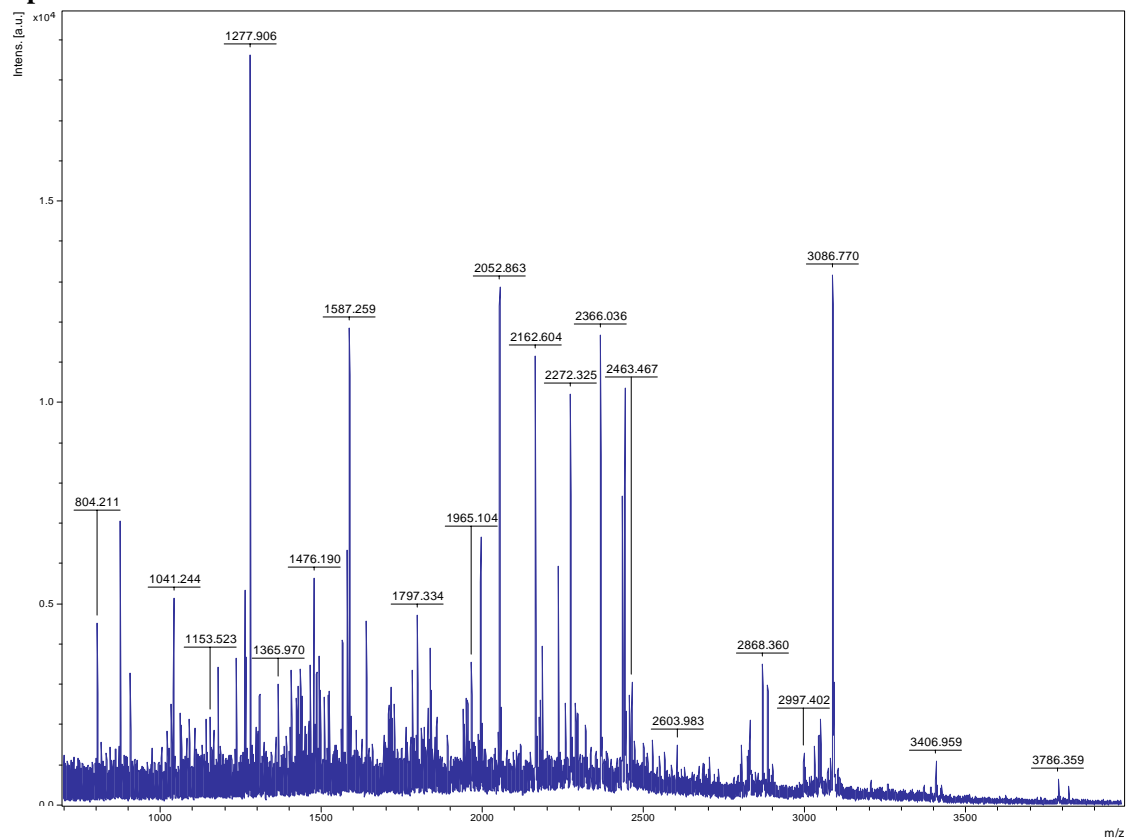

Match to: gi|50921137 Score: 69 Expect: 0.0096

## Matched peptides:

| Start - End | Observed  | Mr (expt) | Mr (calc) | Delta   | Miss Sequence                                                       |
|-------------|-----------|-----------|-----------|---------|---------------------------------------------------------------------|
| 1 - 23      | 2184.1452 | 2183.1379 | 2183.0276 | 0.1103  | 0 -.MADATHAAADGGVATILASADGR.D Acetyl (N-term)                       |
| 2 - 23      | 2053.0627 | 2052.0554 | 2051.9871 | 0.0683  | 0 M.ADATHAAADGGVATILASADGR.D Acetyl (N-term)                        |
| 36 - 57     | 2501.2514 | 2500.2441 | 2500.2242 | 0.0199  | 1 K.ISSIKASTVALYFSASWCPPCR.R 2 Carbamidomethyl (C)                  |
| 36 - 57     | 2543.0984 | 2542.0911 | 2542.2348 | -0.1437 | 1 K.ISSIKASTVALYFSASWCPPCR.R Acetyl (N-term); 2 Carbamidomethyl (C) |
| 41 - 57     | 1901.0267 | 1900.0194 | 1899.8647 | 0.1547  | 0 K.ASTVALYFSASWCPPCR.R Acetyl (N-term)                             |
| 41 - 58     | 2015.1568 | 2014.1495 | 2013.9553 | 0.1942  | 1 K.ASTVALYFSASWCPPCR.R                                             |
| 63 - 75     | 1463.7515 | 1462.7442 | 1462.7667 | -0.0225 | 0 K.LIEAYNELVSQK.S                                                  |
| 76 - 97     | 2443.1480 | 2442.1407 | 2442.1015 | 0.0393  | 0 K.SFEVVFVSGSDQDAFNAYFAK.M                                         |
| 120 - 132   | 1405.7372 | 1404.7299 | 1404.8162 | -0.0863 | 0 K.VMGIPHLVILDAK.S                                                 |
| 133 - 159   | 3092.2011 | 3091.1938 | 3091.3934 | -0.1995 | 0 K.SGEIYTEDGVELVHEYGTEAYPFTTER.I                                   |
| 169 - 185   | 1856.9855 | 1855.9782 | 1855.9540 | 0.0242  | 1 K.AAKDNQTHSLFGTPTTR.D                                             |
| 172 - 185   | 1586.7955 | 1585.7882 | 1585.7849 | 0.0034  | 0 K.DNQTHSLFGTPTTR.D                                                |
| 193 - 204   | 1299.5958 | 1298.5885 | 1298.6717 | -0.0832 | 1 K.GDKVPSDLEGG.Y Acetyl (N-term)                                   |
| 278 - 295   | 1949.1108 | 1948.1035 | 1948.0379 | 0.0656  | 0 R.YFELSGPLMLVLIQPDGK.T                                            |
| 296 - 322   | 3002.2128 | 3001.2055 | 3001.3617 | -0.1562 | 0 K.TLNDDIADIIDEHGPDWEGFPFSAEK.L                                    |
| 332 - 354   | 2434.3450 | 2433.3377 | 2433.3002 | 0.0375  | 1 K.AKAESQTLESLLVTGDLDFVLGK.D                                       |
| 334 - 354   | 2235.2244 | 2234.2171 | 2234.1681 | 0.0490  | 0 K.AESQTLESLLVTGDLDFVLGK.D                                         |
| 334 - 358   | 2606.3468 | 2605.3395 | 2605.3486 | -0.0091 | 1 K.AESQTLESLLVTGDLDFVLGKDGAK.V                                     |
| 397 - 411   | 1835.9638 | 1834.9565 | 1834.8849 | 0.0716  | 1 K.EKHDFEIVFISSDR.E                                                |
| 399 - 411   | 1578.7577 | 1577.7504 | 1577.7474 | 0.0030  | 0 K.HNDFEIVFISSDR.E                                                 |
| 444 - 458   | 1437.7750 | 1436.7677 | 1436.8238 | -0.0561 | 0 K.ITGIPSLVAIGPDGK.T                                               |
| 507 - 518   | 1484.7410 | 1483.7337 | 1483.7532 | -0.0194 | 0 K.HDLHDELVLTR.C                                                   |
| 538 - 548   | 1448.6589 | 1447.6516 | 1447.6224 | 0.0292  | 1 R.CKCFDLHPK.C 2 Carbamidomethyl (C)                               |
| 540 - 548   | 1160.4150 | 1159.4077 | 1159.4968 | -0.0891 | 0 K.ECDFLHPK.C Carbamidomethyl (C)                                  |
| 540 - 554   | 1890.9945 | 1889.9872 | 1889.8288 | 0.1585  | 1 K.ECDFLHPKCALEEK.G 2 Carbamidomethyl (C)                          |
| 555 - 579   | 2628.2328 | 2627.2255 | 2627.0573 | 0.1682  | 0 K.GDVEMGEEAEEAPAGYVCEGDVCR.K Carbamidomethyl (C)                  |



# Spot 1450

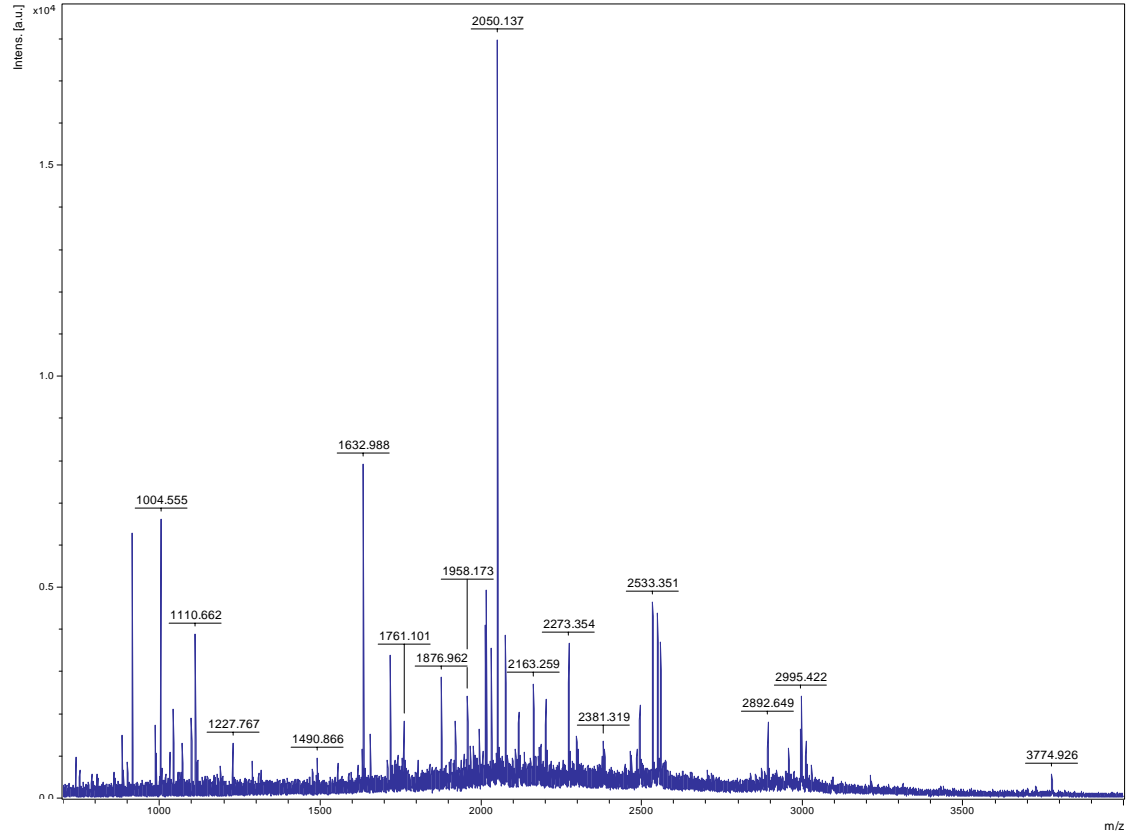

Match to: gi|50918261 Score: 120 Expect: 6.7e-08

| Start - End | Observed  | Mr (expt) | Mr (calc) | Delta   | Miss Sequence                                 |
|-------------|-----------|-----------|-----------|---------|-----------------------------------------------|
| 10 - 25     | 1632.8721 | 1631.8648 | 1631.8267 | 0.0381  | 0 K.ATTPFDGQKPGTSGLR.K                        |
| 10 - 26     | 1760.9784 | 1759.9711 | 1759.9216 | 0.0495  | 1 K.ATTPFDGQKPGTSGLRK.K                       |
| 87 - 105    | 2015.0790 | 2014.0717 | 2014.0669 | 0.0048  | 0 R.VVVGQNSLMSTPAVSAVIRE                      |
| 87 - 105    | 2031.0833 | 2030.0760 | 2030.0618 | 0.0142  | 0 R.VVVGQNSLMSTPAVSAVIRE Oxidation (M)        |
| 207 - 215   | 1099.5678 | 1098.5605 | 1098.5597 | 0.0008  | 0 K.TIFDFESIK.K                               |
| 207 - 216   | 1227.6689 | 1226.6616 | 1226.6546 | 0.0070  | 1 K.TIFDFESIKK.L                              |
| 223 - 240   | 2049.9648 | 2048.9575 | 2048.9414 | 0.0161  | 0 K.FTFYDALHGVAGTYATR.I Carbamidomethyl (C)   |
| 241 - 259   | 2076.1122 | 2075.1049 | 2075.0608 | 0.0441  | 0 R.IFVEELGAESLLNCVPE Carbamidomethyl (C)     |
| 260 - 275   | 1717.8378 | 1716.8305 | 1716.7743 | 0.0562  | 0 K.EDFGGGHPDNLTYAKE                          |
| 286 - 304   | 1876.8227 | 1875.8154 | 1875.7870 | 0.0284  | 0 K.SSNAEPPEFGAAADGDADR.N                     |
| 286 - 310   | 2533.1391 | 2532.1318 | 2532.1550 | -0.0232 | 1 K.SSNAEPPEFGAAADGDADRNMILGK.R               |
| 286 - 310   | 2549.1526 | 2548.1453 | 2548.1499 | -0.0046 | 1 K.SSNAEPPEFGAAADGDADRNMILGK.R Oxidation (M) |
| 362 - 370   | 1110.5606 | 1109.5533 | 1109.5545 | -0.0012 | 0 K.FFEVPTGWK.F                               |
| 425 - 433   | 1043.5910 | 1042.5837 | 1042.6022 | -0.0185 | 0 K.LVTVEDIVR.Q                               |
| 434 - 441   | 1004.4467 | 1003.4394 | 1003.4624 | -0.0230 | 0 R.QHWGTYGR.H                                |
| 483 - 506   | 2558.1622 | 2557.1549 | 2557.1707 | -0.0158 | 1 R.SDVSVDVVADEFYKDPVDGVS.K.H                 |
| 512 - 519   | 914.3887  | 913.3814  | 913.4293  | -0.0479 | 0 R.YLFGDGS.R.L                               |
| 536 - 543   | 1071.5473 | 1070.5400 | 1070.5284 | 0.0116  | 0 R.VYIEQYK.D                                 |

## Spot 1453

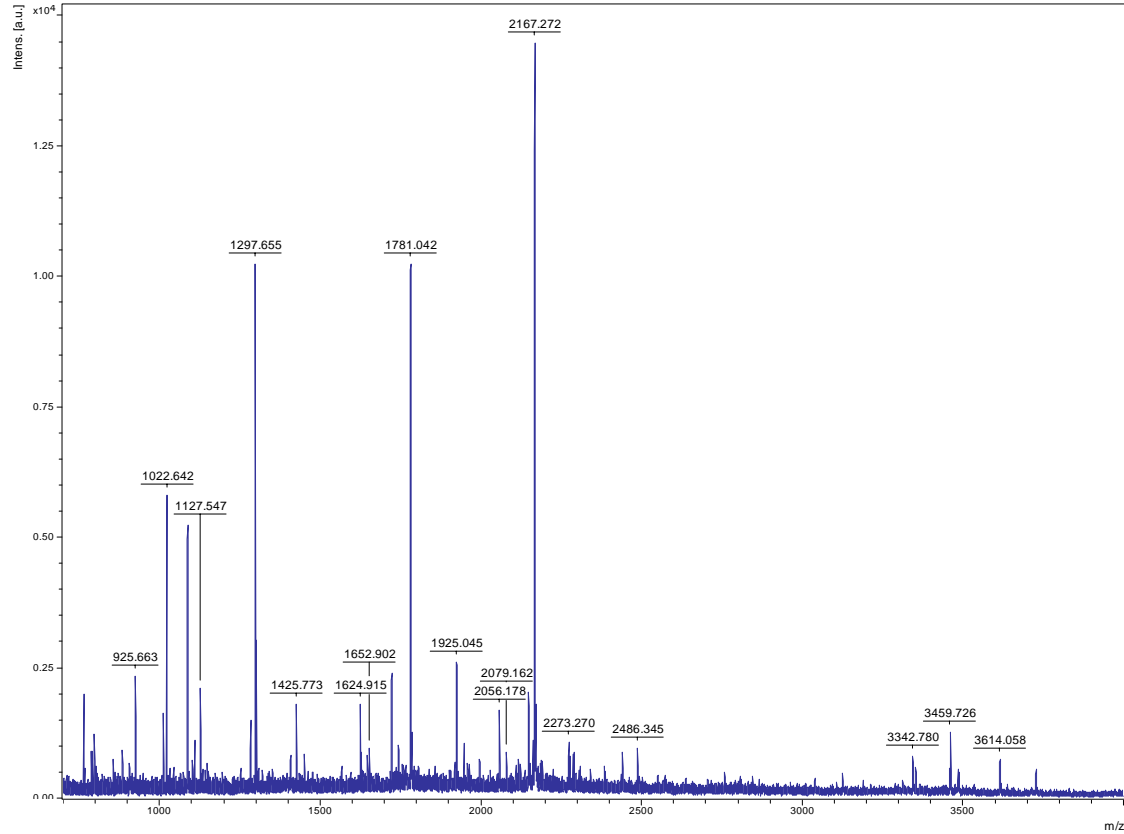

Match to: gi|51535304 Score: 130 Expect: 6.7e-09

### Matched peptides:

| Start - End | Observed  | Mr (expt) | Mr (calc) | Delta   | Miss Sequence                            |
|-------------|-----------|-----------|-----------|---------|------------------------------------------|
| 131 - 160   | 3342.6192 | 3341.6119 | 3341.6707 | -0.0587 | 1 K.VDATEDTLAQKYDVQGFPTLFFIDGVPK.D       |
| 143 - 160   | 2056.0903 | 2055.0830 | 2055.0716 | 0.0114  | 0 K.YDVQGFPTLFFIDGVPK.D                  |
| 202 - 223   | 2167.1699 | 2166.1626 | 2166.1280 | 0.0346  | 0 K.AILAVLDSLGAHSDEIAAASRL               |
| 241 - 249   | 1011.5063 | 1010.4990 | 1010.5549 | -0.0559 | 0 K.LFHLDPAAK.R                          |
| 250 - 257   | 925.5345  | 924.5272  | 924.6120  | -0.0848 | 0 K.RPSLVLLK.K                           |
| 264 - 272   | 1087.5092 | 1086.5019 | 1086.5386 | -0.0366 | 0 K.LTFYDGFPA.A                          |
| 285 - 306   | 2439.2982 | 2438.2909 | 2438.3420 | -0.0511 | 1 K.LPLVNTLTQETAPSIFDNPIKK.Q             |
| 335 - 342   | 1022.5358 | 1021.5285 | 1021.5960 | -0.0675 | 0 K.LLFVVFVER.D                          |
| 343 - 374   | 3459.5244 | 3458.5171 | 3458.5749 | -0.0578 | 0 R.DNEEVGEPVANYFGITGQETTVLAYTGNEAR.N    |
| 375 - 388   | 1624.8445 | 1623.8372 | 1623.8144 | 0.0229  | 0 R.NFFLDGEISVENIK.R                     |
| 375 - 389   | 1780.9581 | 1779.9508 | 1779.9155 | 0.0354  | 1 R.NFFLDGEISVENIK.R                     |
| 405 - 422   | 1924.9595 | 1923.9522 | 1923.9788 | -0.0266 | 1 K.SEPVPESNEGDVKIVVGK.N Acetyl (N-term) |
| 472 - 481   | 1127.4747 | 1126.4674 | 1126.4825 | -0.0151 | 0 K.MDGTANEHPR.A                         |
| 482 - 497   | 1721.9439 | 1720.9366 | 1720.9188 | 0.0178  | 0 R.AKPDGFPITLFPAGK.K                    |
| 498 - 509   | 1425.7029 | 1424.6956 | 1424.6935 | 0.0021  | 1 K.KSFEPITFEGDR.T                       |
| 499 - 509   | 1297.6044 | 1296.5971 | 1296.5986 | -0.0015 | 0 K.KSFEPITFEGDR.T                       |
| 499 - 516   | 2148.0603 | 2147.0530 | 2147.0244 | 0.0286  | 1 K.KSFEPITFEGDRTVVEMYK.F                |
| 538 - 550   | 1450.7600 | 1449.7527 | 1449.7059 | 0.0468  | 1 K.TEKDQSTASTNLR.G                      |

### Spot 1459

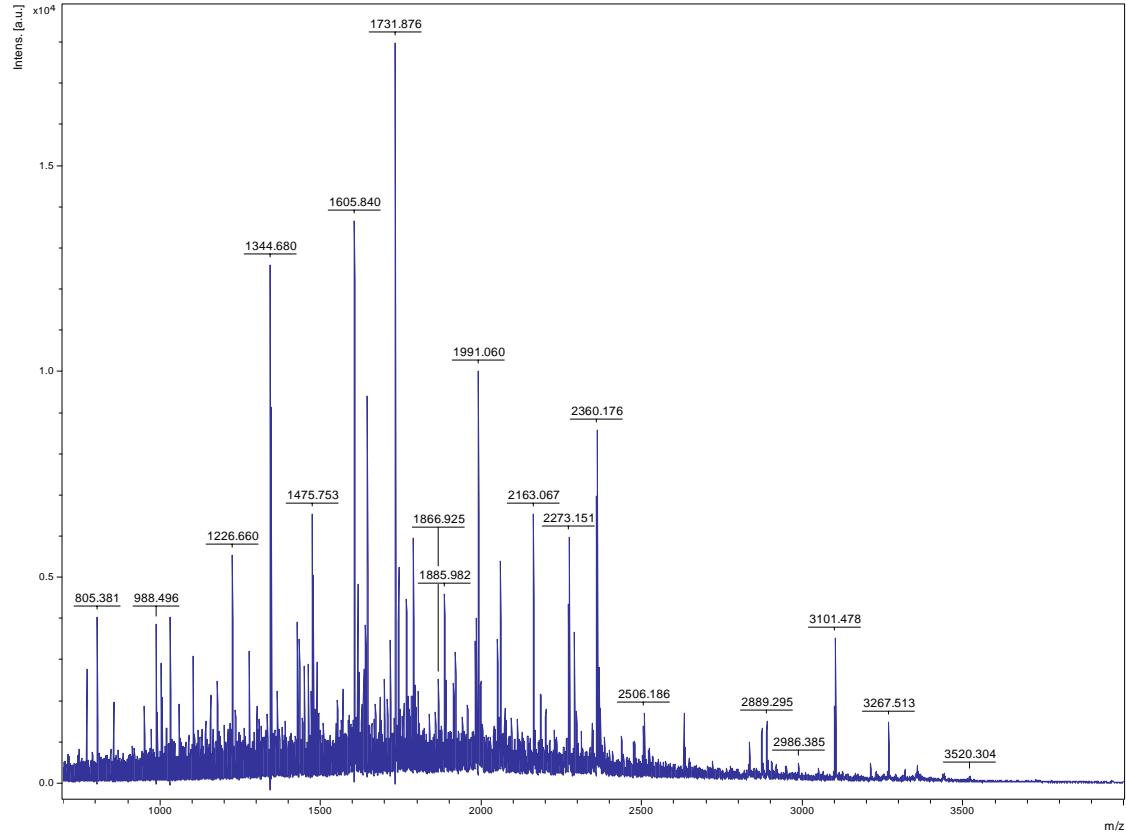

Match to: gi|75142638 Score: 75 Expect: 1.7e-12

| Start - End | Observed  | Mr (expt) | Mr (calc) | ppm | Miss Sequence                     |
|-------------|-----------|-----------|-----------|-----|-----------------------------------|
| 1 - 15      | 1553.7805 | 1552.7732 | 1552.7589 | 9   | -MAVMTDVSTTGTALR.T                |
| 32 - 46     | 1767.8420 | 1766.8347 | 1766.8145 | 11  | R.FIDEMTTNVDVQER.V                |
| 77 - 93     | 1991.0600 | 1990.0527 | 1990.0524 | 0   | R.AKVPVVSYYDDLQPYIQR.I            |
| 79 - 93     | 1791.9068 | 1790.8995 | 1790.9203 | -12 | K.VPVVSYDDLQPYIQR.I               |
| 94 - 122    | 2986.3846 | 2985.3774 | 2985.4792 | -34 | R.IANGDRSPILSTHPVSEFLTSSGTSAGER.K |
| 123 - 134   | 1461.7454 | 1460.7382 | 1460.7367 | 1   | R.KLMPITMDELDR.R                  |
| 233 - 243   | 1103.6308 | 1102.6235 | 1102.6499 | -24 | R.LGAVFASGLLR.A                   |
| 298 - 306   | 988.4964  | 987.4892  | 987.5138  | -25 | K.GDWAGIIR.V                      |
| 403 - 416   | 1641.8277 | 1640.8204 | 1640.8410 | -13 | R.EYELVITTYAGLNR.Y                |
| 425 - 436   | 1344.6795 | 1343.6723 | 1343.6735 | -1  | R.VTGFHNAAPQRF.F                  |
| 487 - 500   | 1731.8763 | 1730.8690 | 1730.9396 | -41 | R.IPGHYVIYWELLTK.G                |
| 501 - 514   | 1302.6745 | 1301.6672 | 1301.6576 | 7   | K.GAGATVVDADTLGR.C                |
| 532 - 543   | 1226.6604 | 1225.6532 | 1225.6666 | -11 | R.VADGSIGLEIR.V                   |
| 544 - 560   | 1982.9958 | 1981.9886 | 1981.9931 | -2  | R.VVRPGTFEELMDYAIR.G              |

## Spot 1461

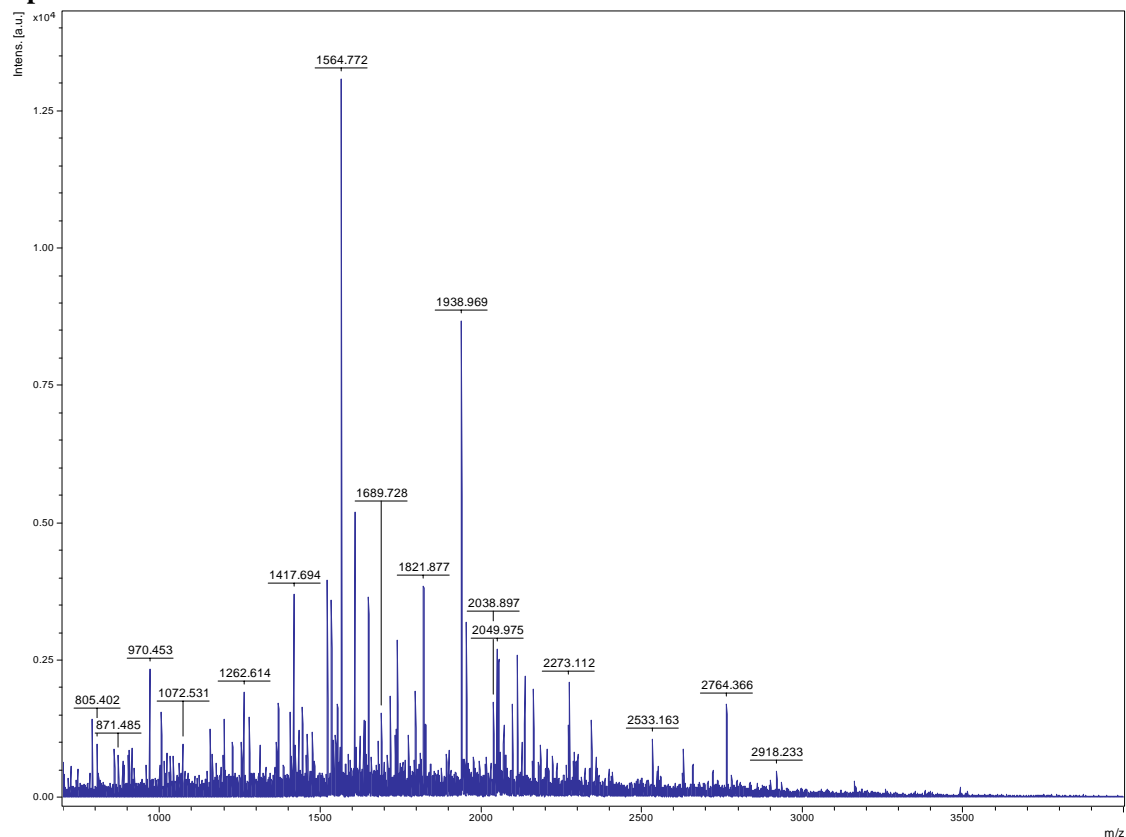

Match to: gi|52075907; Score: 125

### Matched peptides:

| Start - End | Observed | Mr (expt) | Mr (calc) | Delta | Miss Sequence                    |
|-------------|----------|-----------|-----------|-------|----------------------------------|
| 6 - 22      | 2038.90  | 2037.89   | 2037.92   | -0.02 | 1 VTFEEDSEKESEYGYVR              |
| 23 - 44     | 2206.10  | 2205.09   | 2205.13   | -0.03 | 1 KVSGPVVADGMGGAAMYELVR          |
| 45 - 56     | 1312.69  | 1311.69   | 1311.71   | -0.02 | 0 VGNDNLIGEIR                    |
| 113 - 120   | 906.45   | 905.45    | 905.46    | -0.01 | 0 SGDVYIPR                       |
| 201 - 211   | 1406.69  | 1405.69   | 1405.72   | -0.03 | 0 QFTMLQTPVPR                    |
| 201 - 211   | 1422.69  | 1421.69   | 1421.71   | -0.03 | 0 QFTMLQTPVPR Oxidation (M)      |
| 220 - 231   | 1255.65  | 1254.65   | 1254.69   | -0.04 | 0 LAADTPLLTGQR                   |
| 265 - 279   | 1689.73  | 1688.73   | 1688.75   | -0.02 | 0 YNSSEAVVYVCGGER                |
| 309 - 323   | 1545.75  | 1544.75   | 1544.80   | -0.05 | 0 TTLVANTSNNMPVAAR               |
| 309 - 323   | 1561.75  | 1560.75   | 1560.79   | -0.05 | 0 TTLVANTSNNMPVAAR Oxidation (M) |
| 324 - 338   | 1733.83  | 1732.82   | 1732.87   | -0.04 | 0 EASIYTGITAEYFR                 |
| 339 - 353   | 1680.79  | 1679.79   | 1679.66   | -0.13 | 0 DMGYNVSMADSTSR Oxidation (M)   |
| 365 - 381   | 1795.84  | 1794.84   | 1794.86   | -0.02 | 0 LAEMPADSGYPAYLAAR              |
| 382 - 388   | 885.45   | 884.45    | 884.44    | 0.01  | 0 LASFYER                        |
| 460 - 476   | 2135.99  | 2134.99   | 2135.02   | -0.03 | 1 ALESFYEKFDQDFIDIR              |
| 479 - 485   | 871.49   | 870.48    | 870.50    | -0.02 | 1 AREVLQR                        |
| 481 - 498   | 2097.07  | 2096.07   | 2096.11   | -0.04 | 1 EVLQREDDLNEIVQLVGK             |
| 486 - 506   | 2301.13  | 2300.13   | 2300.14   | -0.01 | 1 EDDLNEIVQLVGKDALAESDK          |
| 537 - 542   | 809.37   | 808.37    | 808.37    | -0.01 | 0 SVWMMR                         |
| 543 - 557   | 1739.88  | 1738.88   | 1738.91   | -0.03 | 0 NIHFNTLANQAVR                  |
| 575 - 581   | 901.40   | 900.40    | 900.42    | -0.02 | 0 MGDLYFR                        |
| 604 - 613   | 1200.57  | 1199.57   | 1199.58   | -0.01 | 0 LYDDLTTGFR                     |

Match to: gi|50878307; Score: 68

### Matched peptides:

| Start - End | Observed | Mr (expt) | Mr (calc) | Delta | Miss Sequence                         |
|-------------|----------|-----------|-----------|-------|---------------------------------------|
| 21 - 30     | 1004.46  | 1003.46   | 1003.46   | -0.00 | 1 CRDGAAAAGR                          |
| 203 - 209   | 921.42   | 920.42    | 920.40    | 0.02  | 0 FAYDSYR                             |
| 342 - 360   | 2049.98  | 2048.97   | 2049.05   | -0.08 | 0 LYGEFLVNAQGEDVVAGIR                 |
| 361 - 384   | 2918.23  | 2917.23   | 2917.26   | -0.03 | 1 TPEDLDAMRDHMPEPYEELVENCK            |
| 405 - 411   | 1006.49  | 1005.48   | 1005.49   | -0.01 | 0 LWMLQCR                             |
| 405 - 411   | 1022.47  | 1021.47   | 1021.48   | -0.01 | 0 LWMLQCR Oxidation (M)               |
| 423 - 435   | 1444.71  | 1443.71   | 1443.74   | -0.03 | 0 IAVDMVNEGLVER                       |
| 503 - 523   | 2111.99  | 2110.99   | 2111.03   | -0.04 | 0 TETSPEDVGGMHAAVGILTAR               |
| 503 - 523   | 2128.01  | 2127.01   | 2127.03   | -0.02 | 0 TETSPEDVGGMHAAVGILTAR Oxidation (M) |
| 636 - 646   | 1369.56  | 1368.56   | 1368.58   | -0.02 | 0 TEHMFASDER                          |
| 649 - 662   | 1636.84  | 1635.84   | 1635.84   | -0.01 | 1 AVRQMIASSLELR 2 Oxidation (M)       |
| 675 - 682   | 970.45   | 969.45    | 969.46    | -0.00 | 0 SDFEGIFR                            |
| 683 - 692   | 1072.53  | 1071.53   | 1071.57   | -0.05 | 0 AMDGLPVTIR                          |
| 693 - 712   | 2343.14  | 2342.14   | 2342.17   | -0.03 | 0 LLDPLHEFLPEGHVEDMVR                 |
| 693 - 712   | 2359.13  | 2358.13   | 2358.17   | -0.04 | 0 LLDPLHEFLPEGHVEDMVR Oxidation (M)   |
| 732 - 742   | 1262.61  | 1261.61   | 1261.65   | -0.04 | 0 LSEVNPMLGFR                         |
| 732 - 742   | 1278.61  | 1277.61   | 1277.64   | -0.04 | 0 LSEVNPMLGFR Oxidation (M)           |
| 746 - 759   | 1607.85  | 1606.84   | 1606.80   | 0.04  | 0 LGISYPELTEMQAR                      |
| 746 - 759   | 1623.78  | 1622.78   | 1622.80   | -0.02 | 0 LGISYPELTEMQAR Oxidation (M)        |
| 816 - 824   | 1015.55  | 1014.54   | 1014.55   | -0.01 | 0 VGTMIIEPR                           |
| 861 - 882   | 2628.32  | 2627.31   | 2627.37   | -0.06 | 0 FLPIYLSQGIHQDPPEVLDQR               |
| 923 - 934   | 1371.64  | 1370.63   | 1370.63   | 0.00  | 0 AGLDYYVSCSPFR                       |

## Spot 1474

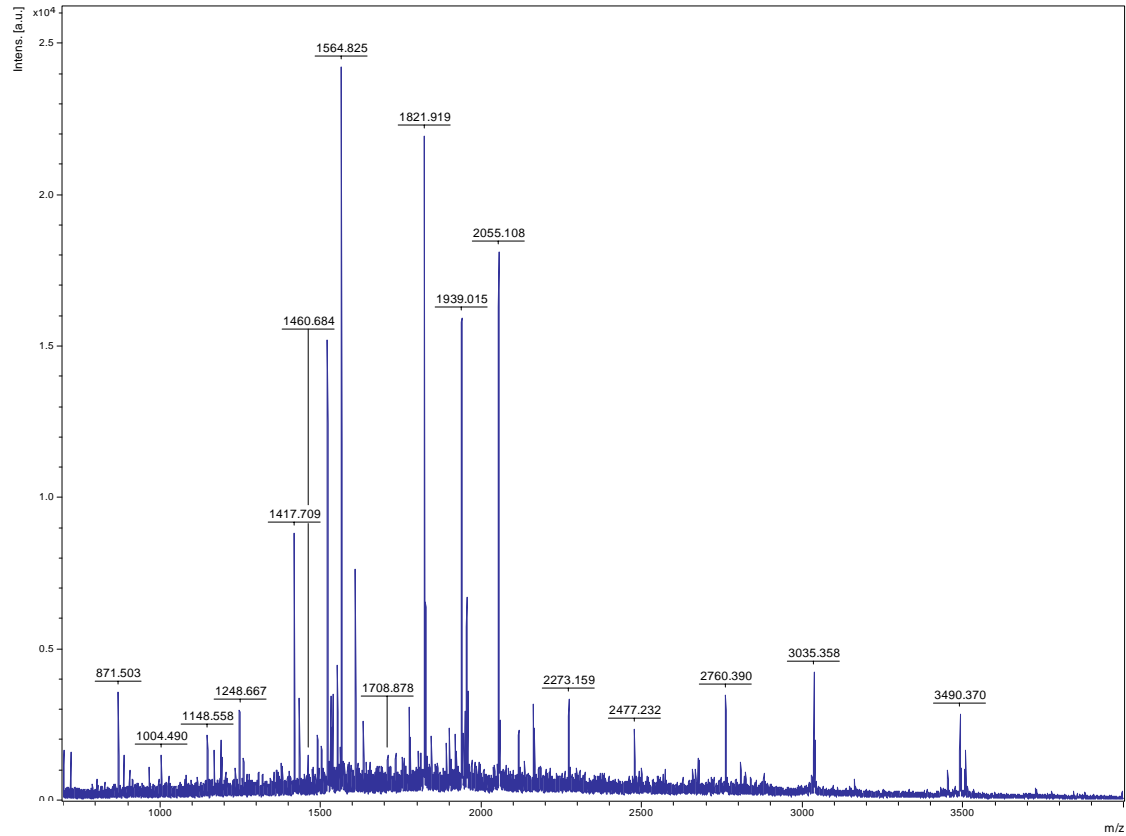

Match to: gi|50913271 Score: 131 Expect: 5.3e-09

### Matched peptides:

| Start - End | Observed  | Mr (expt) | Mr (calc) | Delta   | Miss Sequence                       |
|-------------|-----------|-----------|-----------|---------|-------------------------------------|
| 85 - 95     | 1191.5527 | 1190.5454 | 1190.6295 | -0.0841 | 0 R.TTPSVVAFNQK.G                   |
| 85 - 98     | 1533.7953 | 1532.7880 | 1532.7946 | -0.0066 | 1 R.TTPSVVAFNQGER.L                 |
| 107 - 120   | 1552.7776 | 1551.7703 | 1551.7681 | 0.0022  | 0 R.QAVTNPQNTFFGK.R                 |
| 126 - 134   | 1148.5035 | 1147.4962 | 1147.5622 | -0.0659 | 1 R.RFEDPQTQK.E                     |
| 146 - 159   | 1460.6778 | 1459.6705 | 1459.6579 | 0.0126  | 0 K.APNGDAWVETTDGK.Q                |
| 160 - 173   | 1538.8150 | 1537.8077 | 1537.8140 | -0.0063 | 0 K.QYSPSIQIGAFVLT.K.M              |
| 189 - 202   | 1564.8188 | 1563.8115 | 1563.8045 | 0.0070  | 0 K.AVITVPAYFNDAQR.Q                |
| 219 - 235   | 1776.9185 | 1775.9112 | 1775.9053 | 0.0059  | 0 R.IINEPTAAALSYGTNNK.E             |
| 265 - 291   | 3035.4071 | 3034.3998 | 3034.4559 | -0.0561 | 1 K.ATNGDTFLGGEDFDNTLLEFLVSEFKR.S   |
| 314 - 339   | 2676.3721 | 2675.3648 | 2675.4017 | -0.0369 | 1 K.AKIELSSTAQTEINLPFITADASGAK.H    |
| 316 - 339   | 2477.2307 | 2476.2234 | 2476.2696 | -0.0462 | 0 K.IELSSSTAQTEINLPFITADASGAK.H     |
| 348 - 360   | 1521.8010 | 1520.7937 | 1520.8198 | -0.0261 | 1 R.SKFSLVNSLIER.T                  |
| 378 - 390   | 1417.7080 | 1416.7007 | 1416.7282 | -0.0275 | 0 K.EVDEVLLVGGMTR.V                 |
| 378 - 390   | 1433.7094 | 1432.7021 | 1432.7231 | -0.0210 | 0 K.EVDEVLLVGGMTR.V Oxidation (M)   |
| 394 - 404   | 1248.6235 | 1247.6162 | 1247.6761 | -0.0599 | 0 K.VQEIFSEIFGK.S                   |
| 409 - 428   | 1939.0283 | 1938.0210 | 1937.9992 | 0.0218  | 0 K.GVNPDEAVAMGAAIQGGILR.G          |
| 467 - 484   | 1950.0341 | 1949.0268 | 1948.9966 | 0.0302  | 1 K.KSQVFSTAADNQTQVGIR.V            |
| 468 - 484   | 1821.9191 | 1820.9118 | 1820.9016 | 0.0102  | 0 K.SQVFSTAADNQTQVGIR.V             |
| 485 - 497   | 1490.6988 | 1489.6915 | 1489.7194 | -0.0279 | 1 R.VLQGEREMATDNK.L                 |
| 560 - 574   | 1827.8962 | 1826.8889 | 1826.8581 | 0.0309  | 1 K.MVQEAELHSQKDQER.K               |
| 560 - 574   | 1843.9094 | 1842.9021 | 1842.8530 | 0.0491  | 1 K.MVQEAELHSQKDQER.K Oxidation (M) |
| 600 - 618   | 2055.1235 | 2054.1162 | 2054.0895 | 0.0267  | 1 R.DKIPAEVATEIETAIADLR.S           |

# Spot 1477

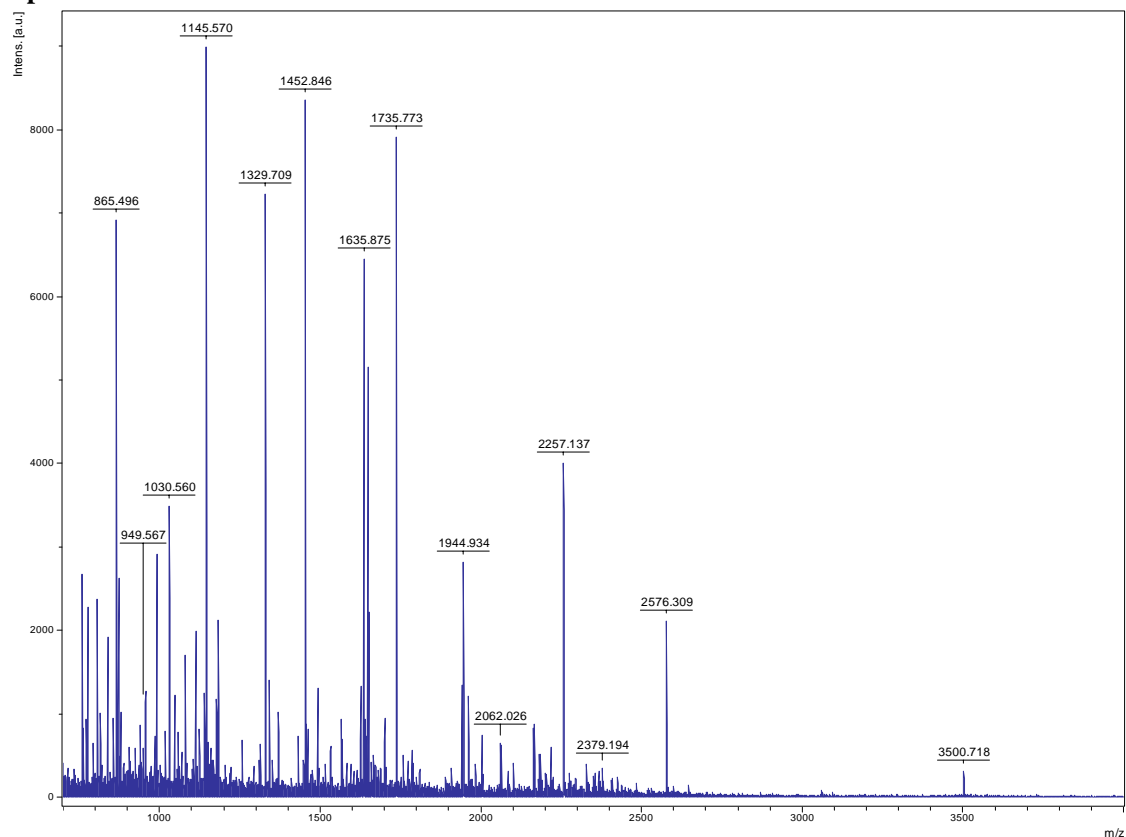

Match to: gi|77548611; Score: 297

## Matched peptides:

| Start - End | Observed | Mr (expt) | Mr (calc) | Delta | Miss Sequence                         |
|-------------|----------|-----------|-----------|-------|---------------------------------------|
| 63 - 69     | 816.50   | 815.50    | 815.48    | 0.02  | 0 AFARPV                              |
| 77 - 84     | 1030.56  | 1029.56   | 1029.54   | 0.02  | 0 RPEYVNR                             |
| 77 - 92     | 2003.01  | 2002.01   | 2002.00   | 0.01  | 1 RPEYVNRIDDPNYVR                     |
| 85 - 92     | 991.50   | 990.50    | 990.48    | 0.02  | 0 IDDPNYVR                            |
| 93 - 99     | 865.50   | 864.49    | 864.47    | 0.02  | 0 IFDITLR                             |
| 124 - 145   | 2257.14  | 2256.14   | 2256.13   | 0.01  | 0 LGVDIIIEAGFPASSPDDLDAVR             |
| 146 - 170   | 2576.31  | 2575.31   | 2575.31   | -0.00 | 0 SIAIEVGNTPVGEDGHVPVICGLSR           |
| 175 - 184   | 1145.57  | 1144.57   | 1144.55   | 0.02  | 0 DIDAAWEAVR                          |
| 208 - 218   | 1183.70  | 1182.70   | 1182.70   | 0.00  | 1 KTPQVVAIAK                          |
| 219 - 225   | 839.43   | 838.42    | 838.40    | 0.02  | 0 EMVAYAR                             |
| 219 - 225   | 855.42   | 854.42    | 854.40    | 0.02  | 0 EMVAYAR Oxidation (M)               |
| 226 - 241   | 1735.77  | 1734.77   | 1734.75   | 0.02  | 0 SLGCPDVEFSPEDAGR                    |
| 245 - 256   | 1532.81  | 1531.81   | 1531.83   | -0.02 | 0 EFLYHILEEVK                         |
| 257 - 278   | 2328.17  | 2327.17   | 2327.17   | 0.00  | 0 AGATTLNIPDTVGYTLPYEFVK              |
| 285 - 319   | 3500.72  | 3499.72   | 3499.72   | -0.01 | 0 ANTPGIENAIISTHCQNDLGLATANTLAGAHAGAR |
| 320 - 331   | 1311.69  | 1310.69   | 1310.68   | 0.01  | 0 QLEVTINGIGER Pyro-glu (N-term Q)    |
| 320 - 331   | 1328.73  | 1327.72   | 1327.71   | 0.01  | 0 QLEVTINGIGER                        |
| 332 - 345   | 1431.74  | 1430.74   | 1430.74   | -0.00 | 0 AGNASLEEVVMAIK                      |
| 332 - 345   | 1447.74  | 1446.74   | 1446.74   | -0.00 | 0 AGNASLEEVVMAIK Oxidation (M)        |
| 349 - 368   | 2163.08  | 2162.08   | 2162.10   | -0.03 | 0 ELLGGLYTGINTQHITMSSK                |
| 369 - 382   | 1642.80  | 1641.80   | 1641.80   | -0.00 | 0 MVQEHSLHVPQPHK Oxidation (M)        |
| 383 - 403   | 2166.07  | 2165.07   | 2165.07   | -0.00 | 0 AIVGANAFAHESGIHQDGMK                |
| 383 - 403   | 2182.07  | 2181.07   | 2181.06   | 0.00  | 0 AIVGANAFAHESGIHQDGMK Oxidation (M)  |
| 406 - 420   | 1649.85  | 1648.84   | 1648.83   | 0.01  | 0 GTYEIISPDDIGLTR                     |
| 421 - 430   | 1047.59  | 1046.59   | 1046.58   | 0.01  | 0 ANEFGIVLKG                          |
| 469 - 487   | 2218.12  | 2217.12   | 2217.12   | 0.00  | 1 RVTDEIEALLSDEIFQPK                  |
| 470 - 487   | 2062.03  | 2061.02   | 2061.02   | 0.01  | 0 VTDEIEALLSDEIFQPK                   |
| 520 - 534   | 1492.75  | 1491.74   | 1491.74   | 0.00  | 0 IACAVGTGPVDAAYK                     |
| 535 - 547   | 1452.85  | 1451.84   | 1451.83   | 0.01  | 0 AVDDIIQIPTVLR                       |
| 548 - 565   | 1944.93  | 1943.93   | 1943.91   | 0.02  | 0 EYSMTSVTEGIDAIATTR                  |
| 548 - 565   | 1960.92  | 1959.92   | 1959.91   | 0.01  | 0 EYSMTSVTEGIDAIATTR Oxidation (M)    |
| 577 - 586   | 1112.57  | 1111.57   | 1111.55   | 0.02  | 0 HALTGHSFSR                          |
| 587 - 603   | 1635.88  | 1634.87   | 1634.86   | 0.01  | 0 AFSGSGAALDIVVSSVR                   |
| 604 - 611   | 879.50   | 878.50    | 878.49    | 0.02  | 0 AYLSALNK                            |
| 612 - 620   | 939.51   | 938.51    | 938.49    | 0.02  | 0 MSSFVGAIK                           |
| 612 - 620   | 955.52   | 954.51    | 954.48    | 0.03  | 0 MSSFVGAIK Oxidation (M)             |
| 621 - 630   | 1079.51  | 1078.51   | 1078.49   | 0.02  | 0 ASSEVSESQR                          |

## Spot 1480

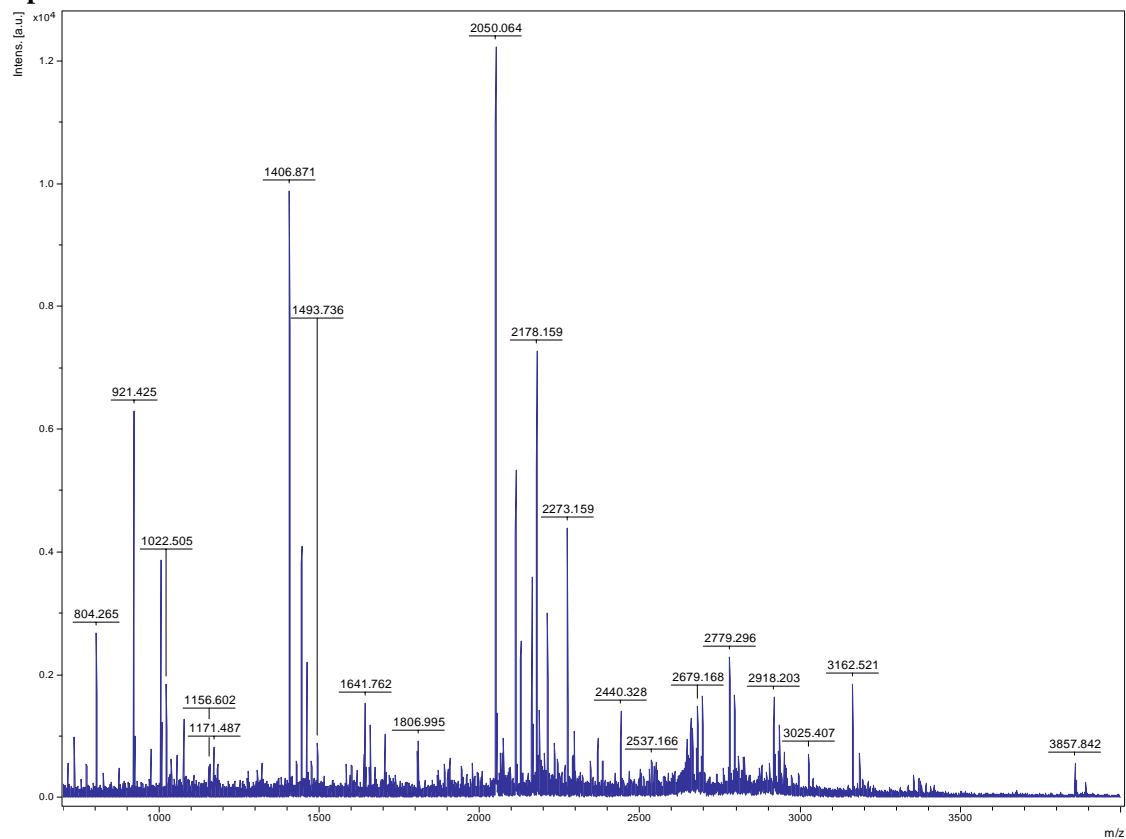

Match to: gi|50878307 Score: 74 Expect: 0.0031

### Matched peptides:

| Start - End | Observed  | Mr (expt) | Mr (calc) | Delta   | Miss Sequence                          |                                        |
|-------------|-----------|-----------|-----------|---------|----------------------------------------|----------------------------------------|
| 99 - 131    | 3353.4960 | 3352.4887 | 3352.6067 | -0.1179 | 0 K.GANLAEMASIGLSPPGFTVSTEACQQYQAAGK.T | Carbamidomethyl (C)                    |
| 156 - 168   | 1406.8897 | 1405.8824 | 1405.8405 | 0.0419  | 0 R.LGDPARPLLSVR.S                     |                                        |
| 203 - 209   | 921.2885  | 920.2812  | 920.4028  | -0.1216 | 0 R.FAYDSYR.R                          |                                        |
| 203 - 210   | 1077.4730 | 1076.4657 | 1076.5039 | -0.0382 | 1 R.FAYDSYRR.F                         |                                        |
| 210 - 230   | 2550.1689 | 2549.1616 | 2549.2446 | -0.0830 | 1 R.RFLDMFGNVVMDIPHALFEEK.L            | Acetyl (N-term)                        |
| 239 - 259   | 2345.1521 | 2344.1448 | 2344.1910 | -0.0462 | 1 K.GLHNDTDLTATDLKELVAQYK.D            |                                        |
| 276 - 293   | 2072.0629 | 2071.0556 | 2071.1214 | -0.0658 | 1 K.KQLQLAVLAVFNSWDSR.A                |                                        |
| 277 - 296   | 2256.1277 | 2255.1204 | 2255.2426 | -0.1221 | 1 K.QQLAVLAVFNSWDSRAIK.Y               |                                        |
| 341 - 360   | 2178.1563 | 2177.1490 | 2177.1479 | 0.0011  | 1 K.KLYGEFLVNAQGEDVVAGIR.T             |                                        |
| 342 - 360   | 2050.0649 | 2049.0576 | 2049.0530 | 0.0046  | 0 K.LYGEFLVNAQGEDVVAGIR.T              |                                        |
| 361 - 384   | 2918.1655 | 2917.1582 | 2917.2568 | -0.0986 | 1 R.TPEDLDAMRDHMPPEYEEELVENCK.I        | Carbamidomethyl (C)                    |
| 392 - 404   | 1641.7774 | 1640.7701 | 1640.7174 | 0.0527  | 0 K.EMMDIEFTVQENR.L                    |                                        |
| 405 - 411   | 1006.4196 | 1005.4123 | 1005.4888 | -0.0765 | 0 R.LWMLQCR.T                          | Carbamidomethyl (C)                    |
| 423 - 435   | 1444.7982 | 1443.7909 | 1443.7391 | 0.0518  | 0 K.IAVDMVNEGLVER.R                    |                                        |
| 441 - 462   | 2536.1598 | 2535.1525 | 2535.2216 | -0.0690 | 0 K.MVEPGHLDQLLHPQFENPSGYK.D           |                                        |
| 465 - 496   | 3162.4566 | 3161.4493 | 3161.6144 | -0.1651 | 0 K.VIATGLPASGAAVGGIVFTAEDAEEAWHAQGG.D |                                        |
| 503 - 523   | 2112.0468 | 2111.0395 | 2111.0316 | 0.0079  | 0 R.TETSPEDVGGMHAAVGLTAR.G             |                                        |
| 540 - 549   | 1171.4466 | 1170.4393 | 1170.4580 | -0.0187 | 0 K.CCVSGCSSLV.V                       | 3 Carbamidomethyl (C)                  |
| 563 - 583   | 2210.1390 | 2209.1317 | 2209.1378 | -0.0061 | 0 K.ALHEGEWLSLNGSTGEVIIGK.Q            |                                        |
| 584 - 606   | 2573.1735 | 2572.1662 | 2572.1978 | -0.0315 | 0 K.QPLCPPALSGDLETFMSWVDEV.R           | Pyro-glu (N-term Q)                    |
| 584 - 606   | 2647.1969 | 2646.1896 | 2646.2458 | -0.0561 | 0 K.QPLCPPALSGDLETFMSWVDEV.R           | Carbamidomethyl (C)                    |
| 713 - 731   | 2133.0329 | 2132.0256 | 2132.0055 | 0.0201  | 1 R.ELCSETGAAQDDVLRARVEK.L             | Acetyl (N-term); Carbamidomethyl (C)   |
| 856 - 882   | 3184.4548 | 3183.4475 | 3183.6240 | -0.1765 | 1 R.DDVGKFLPIYLSQILQHPFVLDQR.G         | Acetyl (N-term)                        |
| 904 - 934   | 3369.4697 | 3368.4624 | 3368.5957 | -0.1332 | 1 K.VGICGEGHGELPSVAFFAKAGLDYVSCSPFR.V  | Acetyl (N-term); 2 Carbamidomethyl (C) |

## Spot 1489

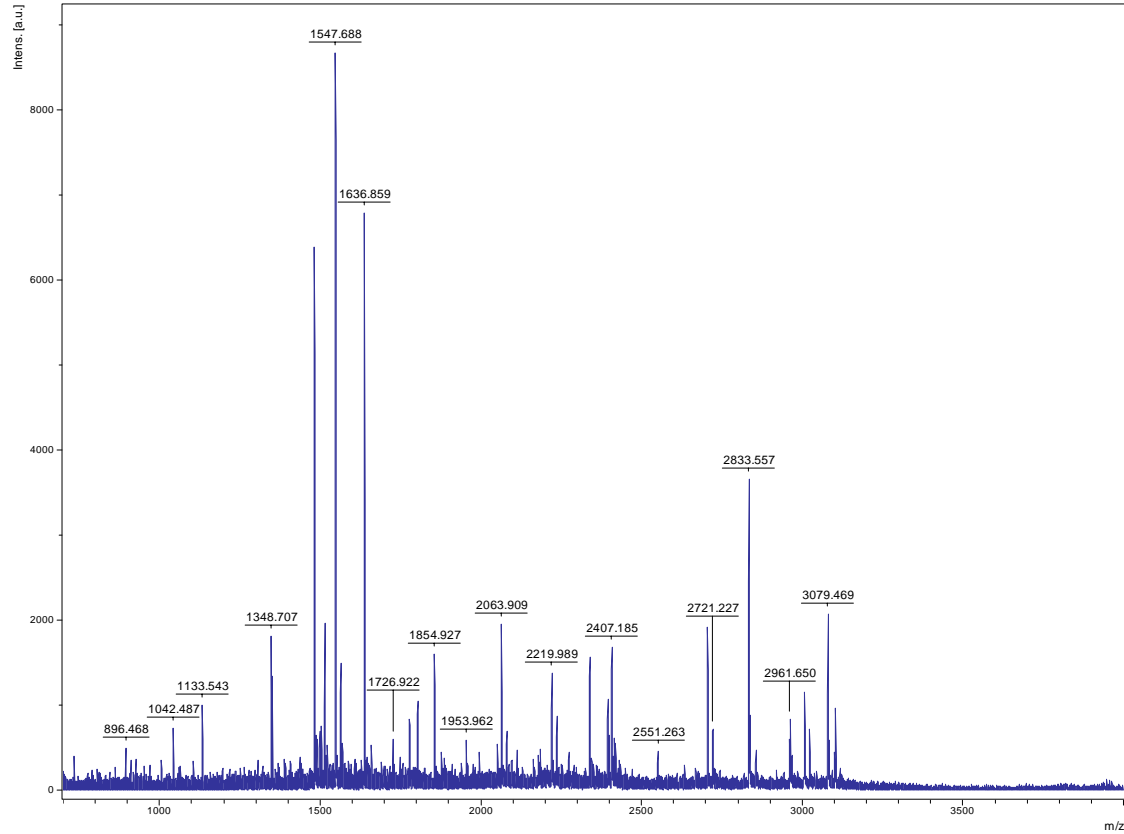

Match to: gi|57863824; Score: 264

### Matched peptides:

| Start - End | Observed | Mr (expt) | Mr (calc) | Delta | Miss Sequence                                |
|-------------|----------|-----------|-----------|-------|----------------------------------------------|
| 65 - 92     | 2721.23  | 2720.22   | 2720.22   | 0.00  | 0 AHGTAVGLPSDDDMGNSEVGHNALGAGR Oxidation (M) |
| 110 - 117   | 926.48   | 925.48    | 925.45    | 0.03  | 0 IFEGEGFK                                   |
| 121 - 142   | 2338.15  | 2337.15   | 2337.17   | -0.02 | 0 ESFDQGLHLIGLLSDGGVHSR                      |
| 163 - 170   | 910.52   | 909.51    | 909.50    | 0.01  | 0 VHILTDGR                                   |
| 171 - 192   | 2407.18  | 2406.18   | 2406.19   | -0.01 | 0 DVLDTGTSVGFVETLENDLSQLR                    |
| 195 - 206   | 1133.54  | 1132.54   | 1132.53   | 0.01  | 0 GIDACIASGGGR                               |
| 207 - 222   | 2063.91  | 2062.91   | 2062.91   | -0.01 | 1 MYVTMDRYENDWDVVK                           |
| 207 - 222   | 2079.92  | 2078.91   | 2078.91   | 0.01  | 1 MYVTMDRYENDWDVVK Oxidation (M)             |
| 223 - 236   | 1563.80  | 1562.80   | 1562.80   | 0.00  | 1 RGWDAQVLGEAPHK                             |
| 224 - 245   | 2394.18  | 2393.18   | 2393.21   | -0.03 | 1 GWDAQVLGEAPHKFQNAVEAVK                     |
| 270 - 286   | 1776.91  | 1775.90   | 1775.92   | -0.02 | 0 AVGPVDDGDAVVTFNFR                          |
| 290 - 304   | 1802.86  | 1801.86   | 1801.86   | -0.01 | 1 MVMIAKALEYEDFDK                            |
| 296 - 307   | 1547.69  | 1546.69   | 1546.69   | -0.01 | 1 ALEYEDFDKFDR                               |
| 315 - 340   | 3005.50  | 3004.50   | 3004.50   | 0.00  | 1 YAGMLQYDGLKLP SHYLVSPPEIER                 |
| 315 - 340   | 3021.50  | 3020.50   | 3020.50   | -0.01 | 1 YAGMLQYDGLKLP SHYLVSPPEIER Oxidation (M)   |
| 327 - 340   | 1636.86  | 1635.86   | 1635.86   | -0.01 | 0 LP SHYLVSPPEIER                            |
| 341 - 348   | 896.47   | 895.47    | 895.47    | 0.00  | 0 TSGEYLVK                                   |
| 349 - 361   | 1482.68  | 1481.68   | 1481.73   | -0.05 | 1 NGIRTFACSETVK                              |
| 353 - 361   | 1042.49  | 1041.48   | 1041.48   | 0.00  | 0 TFACSETVK                                  |
| 362 - 373   | 1481.67  | 1480.67   | 1480.70   | -0.03 | 0 FGHVTFWFNGNR                               |
| 374 - 400   | 3079.47  | 3078.47   | 3078.47   | -0.01 | 1 SGYFDETKEEYVEIPSDSGITFNVKPK                |
| 412 - 423   | 1348.71  | 1347.71   | 1347.71   | -0.01 | 1 DAILSGKFDQVR                               |
| 424 - 446   | 2397.13  | 2396.13   | 2396.15   | -0.02 | 0 VNLPNGDMVGHGTGDIATVVACK                    |
| 492 - 520   | 2961.65  | 2960.65   | 2960.66   | -0.01 | 1 KGEIQLTSHTLQPVVPAIGG PGLHSGVR              |
| 493 - 520   | 2833.56  | 2832.55   | 2832.56   | -0.01 | 0 GEIQLTSHTLQPVVPAIGG PGLHSGVR               |



### Spot 1490

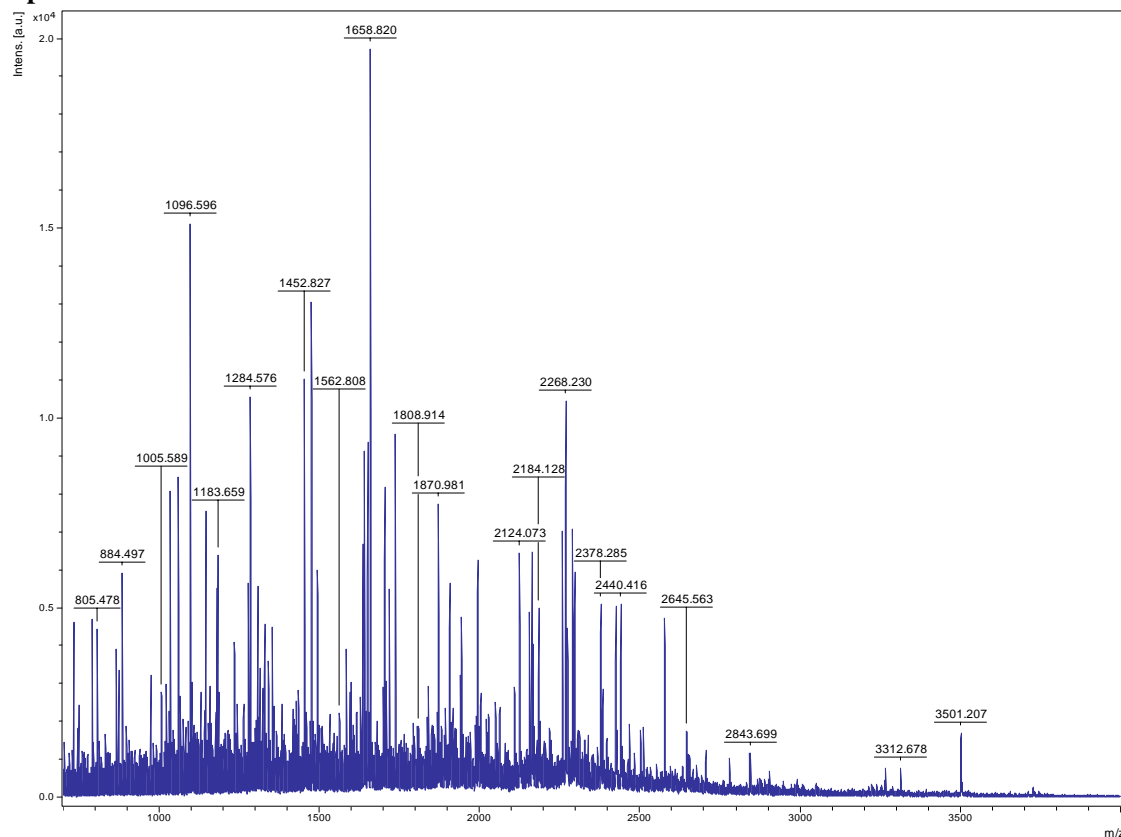

Match to: gi|77548611; Score: 104

#### Matched peptides:

| Start - End | Observed | Mr (expt) | Mr (calc) | Delta | Miss Sequence                   |
|-------------|----------|-----------|-----------|-------|---------------------------------|
| 77 - 92     | 2003.02  | 2002.02   | 2002.00   | 0.02  | 1 RPEYVPNRIDDPNYVR              |
| 93 - 99     | 865.53   | 864.53    | 864.47    | 0.06  | 0 IFDTLLR                       |
| 124 - 145   | 2257.19  | 2256.18   | 2256.13   | 0.06  | 0 LGVDIIIAGFPASSPDDLDAVR        |
| 146 - 170   | 2576.46  | 2575.46   | 2575.31   | 0.15  | 0 SIAIEVGNTPVGEDGHPVICGLSR      |
| 175 - 184   | 1145.56  | 1144.56   | 1144.55   | 0.01  | 0 DIDAAWEAVR                    |
| 191 - 205   | 1808.91  | 1807.91   | 1807.90   | 0.01  | 0 IHTFIATSEIHMQHK Oxidation (M) |
| 191 - 207   | 2062.07  | 2061.07   | 2061.09   | -0.03 | 1 IHTFIATSEIHMQHKLR             |
| 208 - 218   | 1183.66  | 1182.66   | 1182.70   | -0.04 | 1 KTPEQVVAIAK                   |
| 226 - 241   | 1735.77  | 1734.76   | 1734.75   | 0.01  | 0 SLGCPDVEFSPEDAGR              |
| 245 - 256   | 1532.81  | 1531.81   | 1531.83   | -0.02 | 0 EFLYHILEEVK                   |
| 349 - 368   | 2163.10  | 2162.10   | 2162.10   | -0.00 | 0 ELLGGLYTGINQIHITMSSK          |
| 383 - 403   | 2166.09  | 2165.09   | 2165.07   | 0.02  | 0 AIVGANAFAHESGIHQDGMK          |
| 406 - 420   | 1649.80  | 1648.79   | 1648.83   | -0.04 | 0 GTYEHSDDIGLTR                 |
| 535 - 547   | 1452.83  | 1451.82   | 1451.83   | -0.01 | 0 AVDDIIQPTVLR                  |
| 548 - 565   | 1944.95  | 1943.94   | 1943.91   | 0.03  | 0 EYSMTSVTEGIDAIATTR            |
| 587 - 603   | 1635.85  | 1634.85   | 1634.86   | -0.02 | 0 AFSGSGAALDIVVSSVR             |

Match to: gi|52076758; Score: 91

#### Matched peptides:

| Start - End | Observed | Mr (expt) | Mr (calc) | Delta | Miss Sequence                   |
|-------------|----------|-----------|-----------|-------|---------------------------------|
| 40 - 49     | 1102.68  | 1101.68   | 1101.67   | 0.01  | 0 HALPLPSVLR                    |
| 50 - 71     | 2028.02  | 2027.02   | 2027.00   | 0.02  | 0 SPFALADGPASSAAGNPGEIAK        |
| 72 - 97     | 2778.67  | 2777.66   | 2777.51   | 0.15  | 0 LFPNLFQGPSVSLVSPPEPASTRPLK    |
| 145 - 157   | 1651.80  | 1650.80   | 1650.79   | 0.00  | 0 YVELTADYVYPYR                 |
| 158 - 169   | 1341.57  | 1340.57   | 1340.56   | 0.01  | 0 NQGGFDMICSGR                  |
| 249 - 262   | 1599.76  | 1598.76   | 1598.74   | 0.01  | 0 IYSEMIGNVMTDAR                |
| 249 - 262   | 1615.77  | 1614.77   | 1614.74   | 0.03  | 0 IYSEMIGNVMTDAR Oxidation (M)  |
| 267 - 272   | 884.50   | 883.49    | 883.43    | 0.06  | 0 YYHFVR                        |
| 277 - 303   | 2843.70  | 2842.70   | 2842.46   | 0.23  | 0 AASHITLECALQTHPNVALIGEEVAAK   |
| 376 - 383   | 1007.58  | 1006.58   | 1006.55   | 0.03  | 0 QLFDFLPK                      |
| 384 - 393   | 1242.68  | 1241.68   | 1241.70   | -0.02 | 0 TIQEQLLLER                    |
| 384 - 403   | 2288.28  | 2287.27   | 2287.23   | 0.05  | 1 TIQEQLLLERDPHGNVQVAK          |
| 409 - 421   | 1562.81  | 1561.81   | 1561.82   | -0.02 | 1 MLIAMVETELEKR                 |
| 409 - 421   | 1594.83  | 1593.83   | 1593.81   | 0.02  | 1 MLIAMVETELEKR 2 Oxidation (M) |
| 433 - 443   | 1284.58  | 1283.57   | 1283.57   | 0.01  | 0 GQSHFFGYEGR                   |
| 526 - 536   | 1351.69  | 1350.69   | 1350.69   | -0.00 | 1 FASLRDEWSLK                   |

### Spot 1496

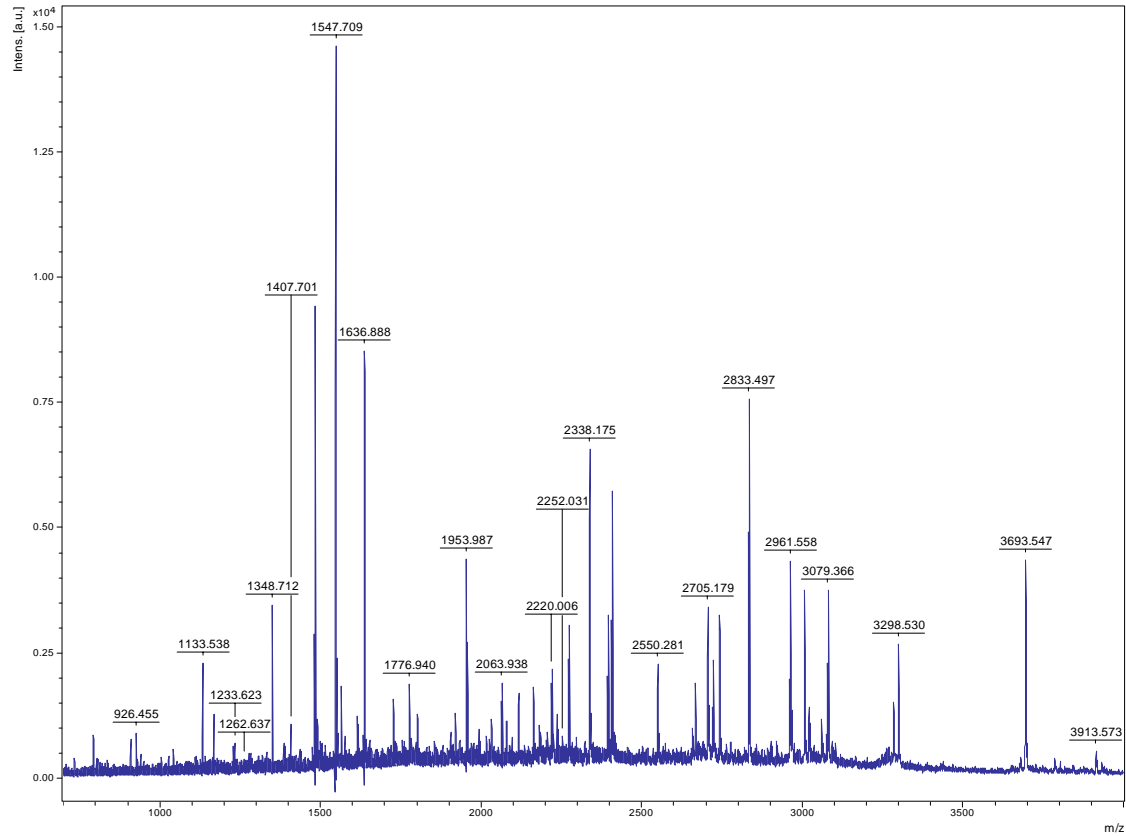

Match to: Q5KQH5\_ORYSA Score: 183 Expect: 1.2e-12

#### Matched peptides:

| Start - End | Observed  | Mr (expt) | Mr (calc) | Delta   | Miss Sequence                                     |
|-------------|-----------|-----------|-----------|---------|---------------------------------------------------|
| 2 - 15      | 1615.7979 | 1614.7906 | 1614.7314 | 0.0592  | 0 M.GSSDFSWTLPDHPK.L Acetyl (N-term)              |
| 2 - 18      | 1954.0224 | 1953.0151 | 1952.9632 | 0.0519  | 1 M.GSSDFSWTLPDHPKLPK.G Acetyl (N-term)           |
| 65 - 92     | 2721.1801 | 2720.1728 | 2720.2208 | -0.0479 | 0 K.AHGTAVGLPSDDDDMGNSEVGHNALGAGR.I Oxidation (M) |
| 110 - 117   | 926.4596  | 925.4523  | 925.4545  | -0.0021 | 0 K.IFEGEGFK.Y                                    |
| 118 - 142   | 2742.3772 | 2741.3699 | 2741.4136 | -0.0437 | 1 K.YIKESFDQGTLLHLIGLLSDGGVHSR.L                  |
| 121 - 142   | 2338.1867 | 2337.1794 | 2337.1712 | 0.0082  | 0 K.ESFDQGTLLHLIGLLSDGGVHSR.L                     |
| 163 - 192   | 3298.5954 | 3297.5881 | 3297.6840 | -0.0959 | 1 R.VHILTDGRDVLDTGTSVGFVETLENDLSQLR.A             |
| 171 - 192   | 2407.2138 | 2406.2065 | 2406.1914 | 0.0151  | 0 R.DVLDTGTSVGFVETLENDLSQLR.A                     |
| 195 - 206   | 1133.5757 | 1132.5684 | 1132.5294 | 0.0390  | 0 K.GIDACIASGGGR.M Carbamidomethyl (C)            |
| 207 - 222   | 2079.9407 | 2078.9334 | 2078.9077 | 0.0257  | 1 R.MYVTMDRYENDWDVVK.R Oxidation (M)              |
| 223 - 236   | 1563.8731 | 1562.8658 | 1562.7953 | 0.0705  | 1 R.KGWDAQVLGEAPHK.F                              |
| 224 - 236   | 1407.7683 | 1406.7610 | 1406.6942 | 0.0668  | 0 R.GWDAQVLGEAPHK.F                               |
| 224 - 245   | 2394.2365 | 2393.2292 | 2393.2127 | 0.0165  | 1 R.GWDAQVLGEAPHKFNQNAVEAVK.T                     |
| 270 - 286   | 1776.9792 | 1775.9719 | 1775.9205 | 0.0514  | 0 K.AVGPIVDGDAVVTFNFR.A                           |
| 290 - 304   | 1802.9502 | 1801.9429 | 1801.8630 | 0.0799  | 1 R.MVMIAKALEYEDFDK.F                             |
| 296 - 307   | 1547.7591 | 1546.7518 | 1546.6939 | 0.0579  | 1 K.ALEYEDFDKFD.R                                 |
| 315 - 340   | 3005.4314 | 3004.4241 | 3004.5004 | -0.0762 | 1 R.YAGMLQYDQELKLP SHYL VSPPEIER.T                |
| 327 - 340   | 1636.9353 | 1635.9280 | 1635.8620 | 0.0660  | 0 K.LPSHYLVSPPEIER.T                              |
| 349 - 361   | 1482.7588 | 1481.7515 | 1481.7296 | 0.0219  | 1 K.NGIRTFACSETVK.F Carbamidomethyl (C)           |
| 374 - 400   | 3079.3901 | 3078.3828 | 3078.4709 | -0.0880 | 1 R.SGYFDETKEEYVEIPSDSGITFNVKPK.M                 |
| 412 - 423   | 1348.7724 | 1347.7651 | 1347.7146 | 0.0505  | 1 R.DAILSGKFDQVR.V                                |
| 492 - 520   | 2961.5939 | 2960.5866 | 2960.6559 | -0.0692 | 1 K.KGEIQILTSHLQPPVVAIGGPGHLSGVR.F                |
| 493 - 520   | 2833.5329 | 2832.5256 | 2832.5609 | -0.0353 | 0 K.GEIQILTSHLQPPVVAIGGPGHLSGVR.F                 |

## Spot 1497

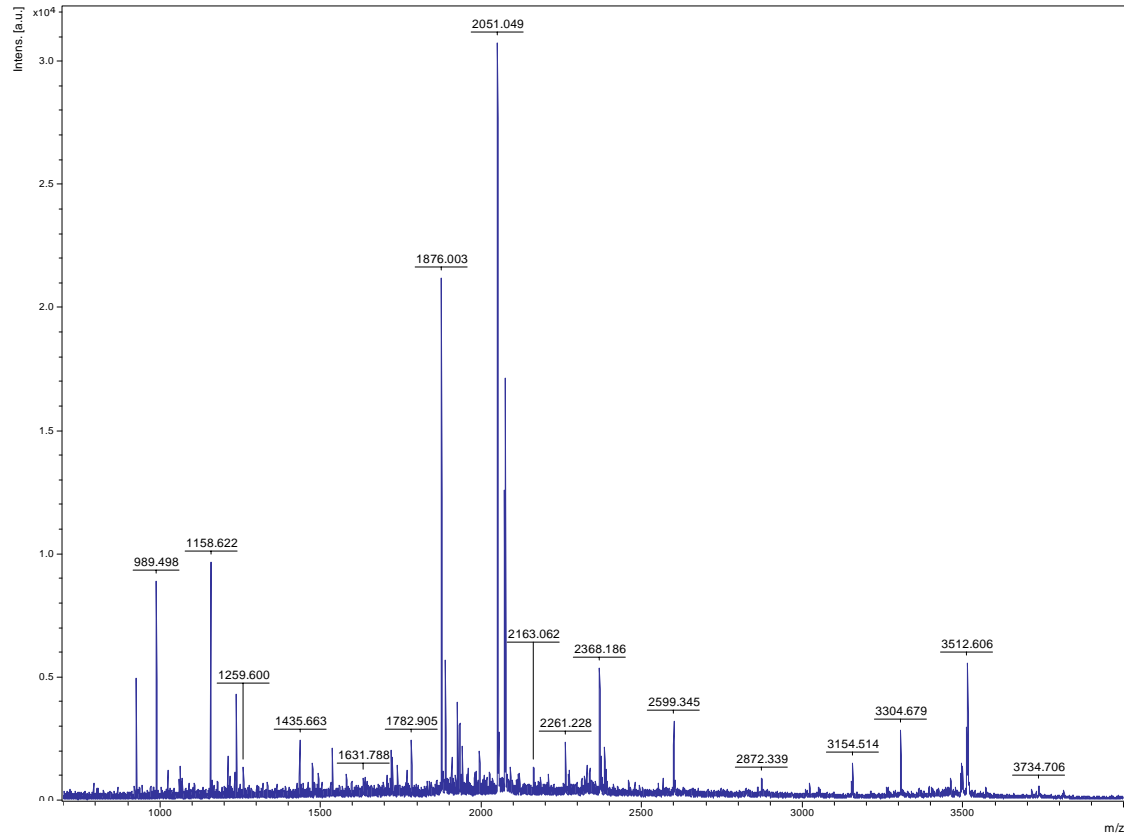

Match to: gj|1706328 Score: 82 Expect: 0.0004

### Matched peptides:

| Start - End | Observed  | Mr (expt) | Mr (calc) | Delta   | Miss Sequence                                                   |
|-------------|-----------|-----------|-----------|---------|-----------------------------------------------------------------|
| 150 - 165   | 1876.0029 | 1874.9957 | 1875.0002 | -0.0046 | 0 R.ILHHTIGLPDFSQELR.C                                          |
| 197 - 219   | 2599.3450 | 2598.3377 | 2598.3264 | 0.0113  | 0 R.ESKPVYLSISCNLPGLPHTFSR.D Carbamidomethyl (C)                |
| 220 - 229   | 1158.6221 | 1157.6148 | 1157.6233 | -0.0085 | 0 R.DPVPFLLAPR.L                                                |
| 234 - 249   | 1721.8801 | 1720.8729 | 1720.8705 | 0.0024  | 0 K.MGLEAAVEATVEFLNK.A                                          |
| 234 - 249   | 1737.8738 | 1736.8665 | 1736.8654 | 0.0011  | 0 K.MGLEAAVEATVEFLNK.A Oxidation (M)                            |
| 345 - 352   | 925.5389  | 924.5316  | 924.5392  | -0.0076 | 0 K.AIIVQPER.V                                                  |
| 353 - 367   | 1579.7740 | 1578.7668 | 1578.7720 | -0.0052 | 0 R.VIVGNPAPFGCVMMK.E Carbamidomethyl (C)                       |
| 380 - 389   | 1259.5996 | 1258.5923 | 1258.5942 | -0.0018 | 1 K.NTTAYENYKR.I                                                |
| 417 - 437   | 2373.0776 | 2372.0704 | 2372.0412 | 0.0291  | 0 K.MLNSDSA VIAETGDSWFNCQK.L Carbamidomethyl (C)                |
| 417 - 437   | 2389.0603 | 2388.0530 | 2388.0362 | 0.0169  | 0 K.MLNSDSA VIAETGDSWFNCQK.L Carbamidomethyl (C); Oxidation (M) |
| 474 - 495   | 2368.1865 | 2367.1792 | 2367.1562 | 0.0230  | 0 R.VIACIGDGSFQVTAQDVSTMIR.C Carbamidomethyl (C)                |
| 526 - 542   | 1887.8978 | 1886.8906 | 1886.8911 | -0.0005 | 0 K.NWNYTGLVDAIHNGEGK.C                                         |
| 550 - 566   | 1908.9257 | 1907.9184 | 1907.8855 | 0.0328  | 1 K.CEEELTEAIGMALGEKK.D Acetyl (N-term); Oxidation (M)          |
| 567 - 583   | 2051.0486 | 2050.0413 | 2049.9499 | 0.0914  | 1 K.DCLCFIEVIAHKDDTSK.E 2 Carbamidomethyl (C)                   |
| 579 - 591   | 1535.7267 | 1534.7194 | 1534.7263 | -0.0069 | 1 K.DDTSKELLEWGSR.V                                             |
| 584 - 591   | 989.4977  | 988.4905  | 988.4978  | -0.0073 | 0 K.ELLEWGSR.V                                                  |
| 592 - 603   | 1237.6239 | 1236.6166 | 1236.6211 | -0.0044 | 0 R.VSAANSRPPNPQ.-                                              |

## Spot 1498

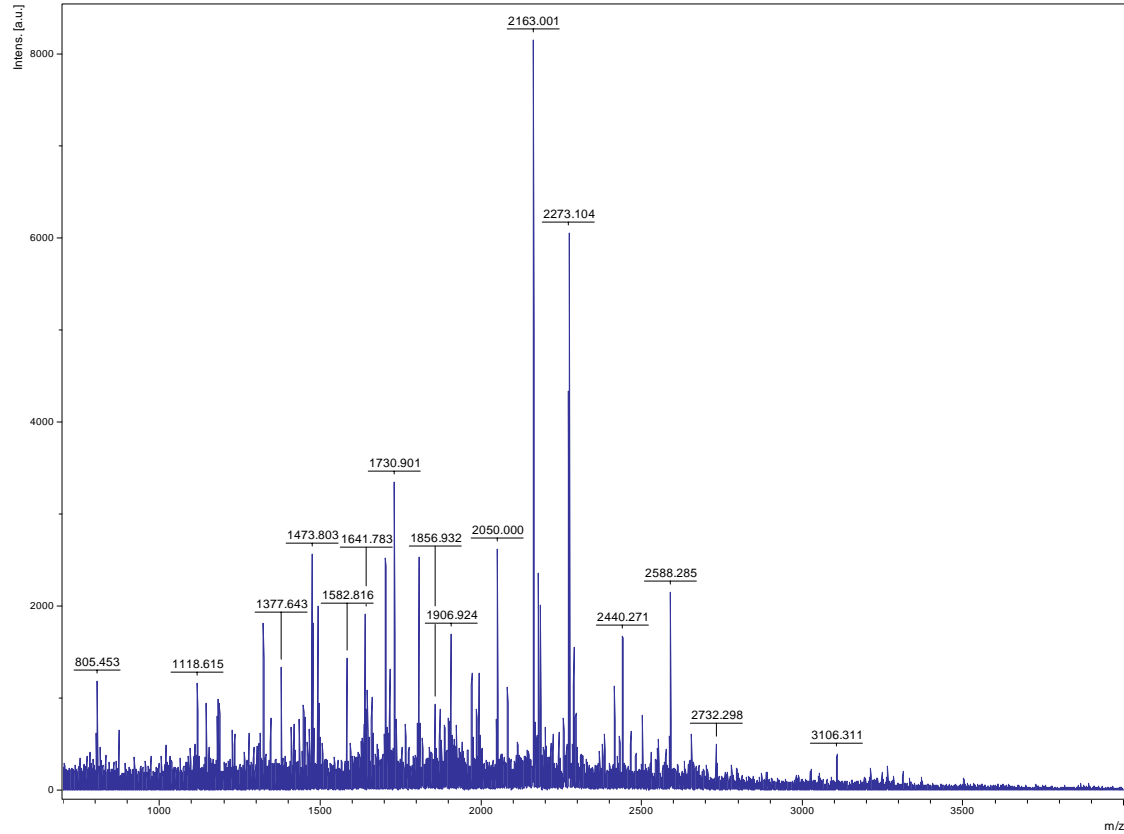

Match to: gi|77557138; Score: 88

### Matched peptides:

| Start - End | Observed | Mr (expt) | Mr (calc) | Delta | Miss Sequence                         |
|-------------|----------|-----------|-----------|-------|---------------------------------------|
| 50 - 65     | 1802.82  | 1801.82   | 1801.91   | -0.10 | 1 LLPRSPSFTPCLDGR                     |
| 66 - 82     | 1898.96  | 1897.95   | 1897.98   | -0.02 | 0 YLLGPDALNHSEISK                     |
| 66 - 93     | 3106.31  | 3105.31   | 3105.50   | -0.20 | 1 YLLGPDALNHSEISKFSENDAGAYPR          |
| 83 - 93     | 1226.57  | 1225.57   | 1225.54   | 0.03  | 0 FSENDAGAYPR                         |
| 104 - 117   | 1646.80  | 1645.80   | 1645.78   | 0.01  | 0 LMDFVIDSPPEMR                       |
| 104 - 117   | 1662.80  | 1661.79   | 1661.78   | 0.01  | 0 LMDFVIDSPPEMR Oxidation (M)         |
| 167 - 178   | 1447.76  | 1446.76   | 1446.75   | 0.01  | 0 ILNNWFEQDLK                         |
| 260 - 284   | 2588.29  | 2587.28   | 2587.39   | -0.10 | 0 VQGVVLADGTEVLTSVVLSNATPYR           |
| 315 - 329   | 1806.89  | 1805.89   | 1805.89   | -0.00 | 1 INVAVDRLPQFSCK                      |
| 402 - 413   | 1377.64  | 1376.64   | 1376.63   | 0.01  | 0 LSEGSWQDSNVR                        |
| 485 - 505   | 1970.92  | 1969.92   | 1969.92   | -0.01 | 0 GLYLCGSGAHPGGVVMGAPGR               |
| 485 - 505   | 1986.90  | 1985.90   | 1985.92   | -0.02 | 0 GLYLCGSGAHPGGVVMGAPGR Oxidation (M) |
| 506 - 516   | 1186.67  | 1185.66   | 1185.64   | 0.03  | 0 NAASVVLEDLR                         |

### Spot 1499

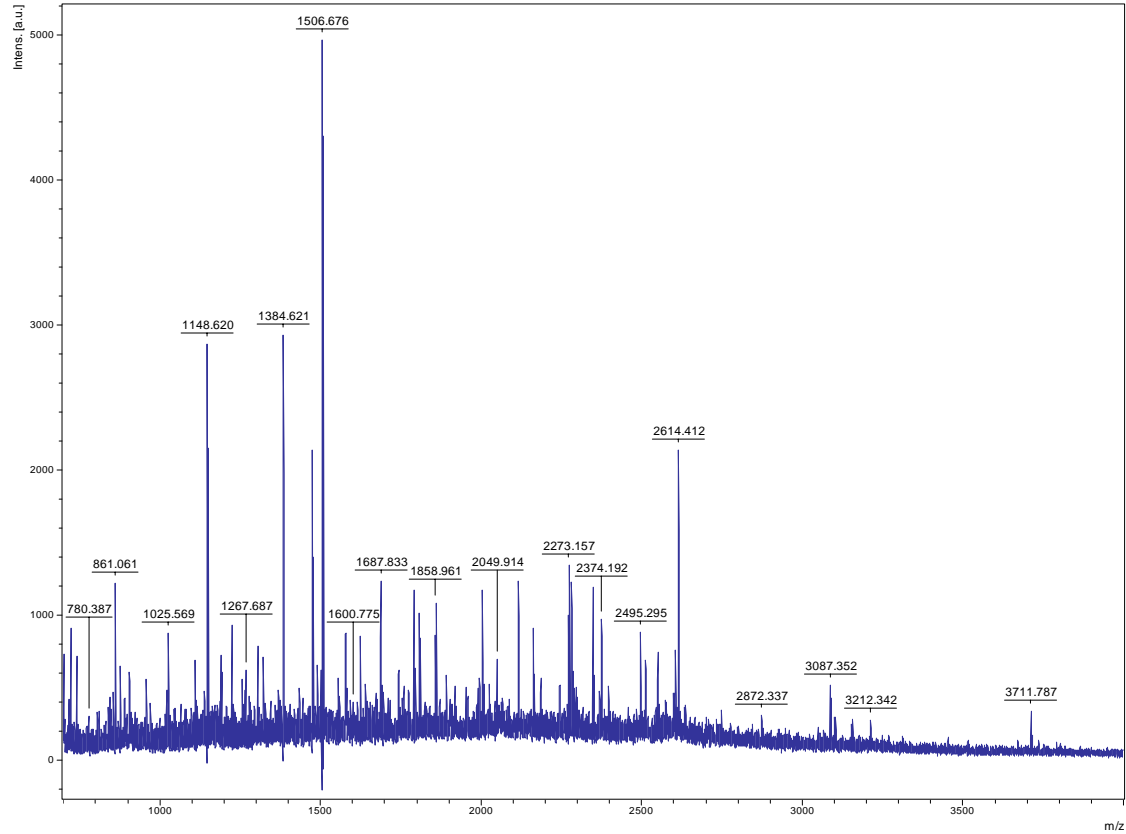

Match to: Q5JK78\_ORYSA Score: 71 Expect: 0.0055

#### Matched peptides:

| Start - End | Observed  | Mr (expt) | Mr (calc) | Delta   | Miss Sequence                                 |
|-------------|-----------|-----------|-----------|---------|-----------------------------------------------|
| 11 - 28     | 2004.1287 | 2003.1214 | 2003.0251 | 0.0963  | 0 K.ETFPGIEIDTSQPPVFK.T                       |
| 29 - 41     | 1474.7961 | 1473.7888 | 1473.7827 | 0.0061  | 0 K.TQLYTLTGVPPEP.Q                           |
| 130 - 140   | 1224.5345 | 1223.5272 | 1223.6146 | -0.0874 | 0 K.SALLSYSDNVR.G                             |
| 157 - 179   | 2614.2566 | 2613.2493 | 2613.4278 | -0.1785 | 0 R.NTFGELDQSVRPVAPLLFLQTLR.K                 |
| 227 - 236   | 1148.5172 | 1147.5099 | 1147.6237 | -0.1137 | 0 K.ELFGIDLVS.R.V                             |
| 303 - 310   | 1025.3794 | 1024.3721 | 1024.5705 | -0.1984 | 0 R.YLTVQFVR.F                                |
| 326 - 344   | 2348.0618 | 2347.0545 | 2347.0929 | -0.0384 | 1 R.KVDYPLELDVYDFCSDELK.Q Carbamidomethyl (C) |
| 352 - 361   | 1191.5183 | 1190.5110 | 1190.5713 | -0.0603 | 1 R.QMLRDAENAK.F Oxidation (M)                |
| 419 - 430   | 1305.5743 | 1304.5670 | 1304.6149 | -0.0479 | 0 R.SADSGHYVGVVK.Q                            |
| 436 - 447   | 1506.6919 | 1505.6846 | 1505.6787 | 0.0060  | 0 K.WIEFDDNPSIR.K                             |

### Spot 1503

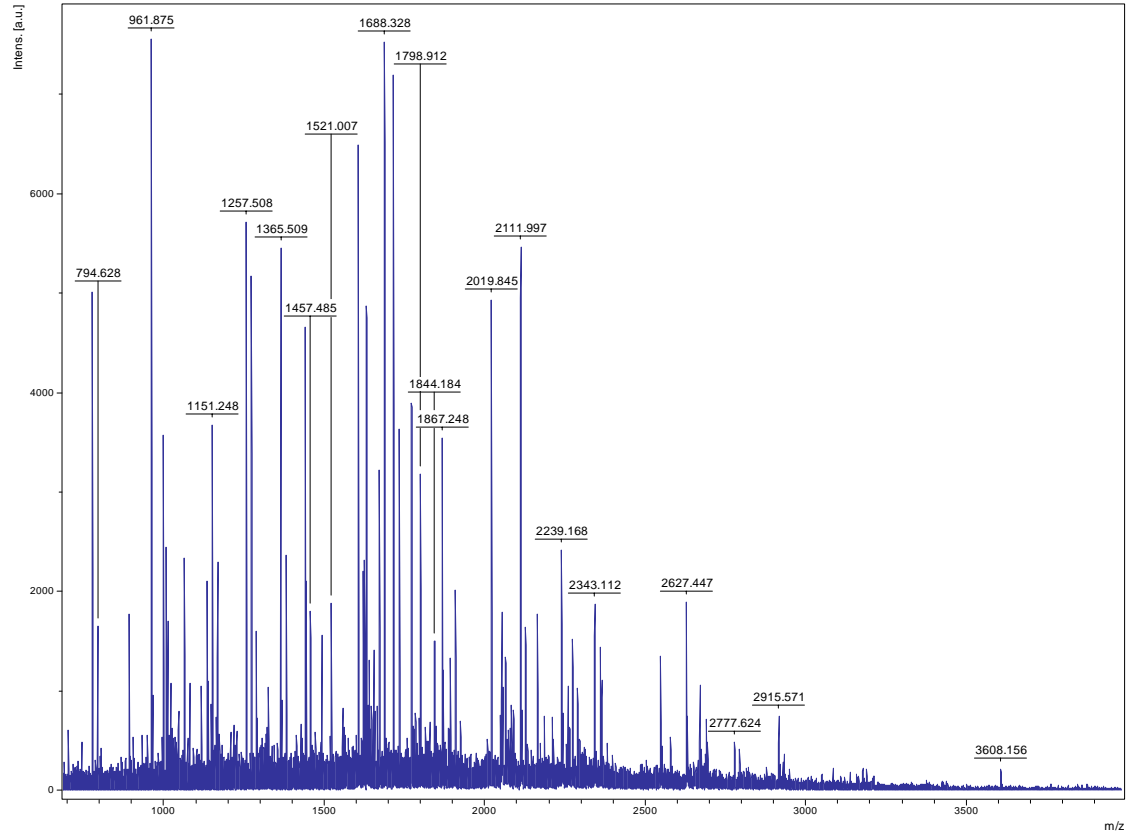

Match to: gj|108710781 Score: 78 Expect: 0.0012

#### Matched peptides:

| Start - End | Observed  | Mr (expt) | Mr (calc) | Delta   | Miss Sequence                           |
|-------------|-----------|-----------|-----------|---------|-----------------------------------------|
| 150 - 163   | 1689.9638 | 1688.9565 | 1688.9097 | 0.0468  | 0 K.QILSQETQYLPITR.G                    |
| 189 - 203   | 1672.9376 | 1671.9303 | 1671.8831 | 0.0472  | 0 K.AVPELQLEYGIAVDR.V                   |
| 233 - 254   | 2259.1796 | 2258.1723 | 2258.1807 | -0.0084 | 1 R.LDAPTRKAPAWPVGSEGNRPPAK.I           |
| 239 - 254   | 1633.8902 | 1632.8829 | 1632.8372 | 0.0458  | 0 K.APAWPPVSGENRPPAK.I                  |
| 255 - 266   | 1174.6016 | 1173.5943 | 1173.6757 | -0.0814 | 0 K.IPVVPPSPSGK.D                       |
| 255 - 279   | 2672.3395 | 2671.3322 | 2671.3956 | -0.0633 | 1 K.IPVVPPSPSGKDDIETPEQLSK.Q            |
| 333 - 350   | 1908.9465 | 1907.9392 | 1907.9047 | 0.0346  | 0 R.YPMNDAAGTINEIGSTVRR.R               |
| 333 - 351   | 2065.0337 | 2064.0264 | 2064.0058 | 0.0207  | 1 R.YPMNDAAGTINEIGSTVRR.V               |
| 333 - 351   | 2080.9974 | 2079.9901 | 2080.0007 | -0.0106 | 1 R.YPMNDAAGTINEIGSTVRR.V Oxidation (M) |
| 397 - 405   | 901.3647  | 900.3574  | 900.4089  | -0.0515 | 0 K.YGGASAGYR.T                         |
| 456 - 480   | 2547.2543 | 2546.2470 | 2546.2805 | -0.0334 | 0 R.SSYIAPDLVASVPDPGAVAAAAWYR.A         |

## Spot 1506

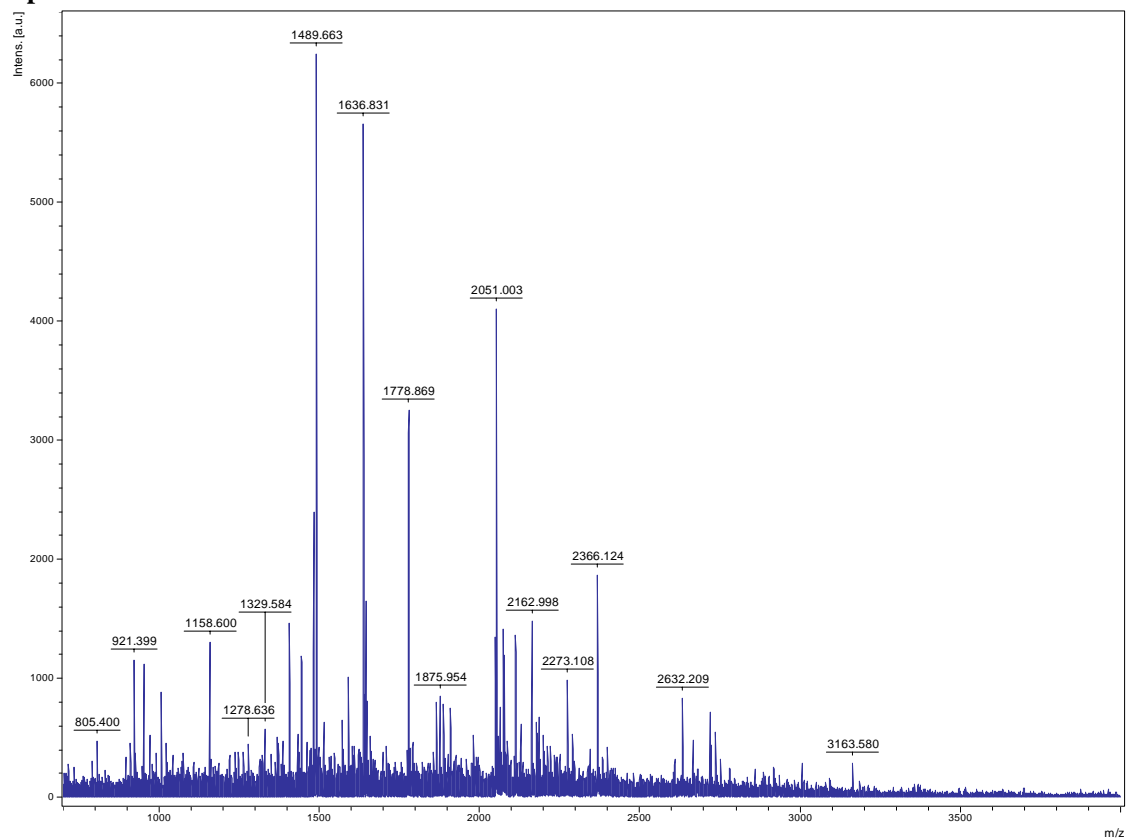

Match to: gi|56785335; Score: 109

### Matched peptides:

| Start - End | Observed | Mr (expt) | Mr (calc) | Delta | Miss Sequence                                |
|-------------|----------|-----------|-----------|-------|----------------------------------------------|
| 38 - 53     | 1875.95  | 1874.95   | 1874.90   | -0.05 | 0 YNCIHVAQTPVMDSLK                           |
| 65 - 92     | 2719.19  | 2718.18   | 2718.24   | -0.06 | 0 AHGTAVGLPSEDDMGNSEVGHNALGAGR               |
| 65 - 92     | 2735.18  | 2734.17   | 2734.24   | -0.06 | 0 AHGTAVGLPSEDDMGNSEVGHNALGAGR Oxidation (M) |
| 163 - 170   | 910.50   | 909.49    | 909.50    | -0.01 | 0 VHILTDGR                                   |
| 171 - 192   | 2366.12  | 2365.12   | 2365.16   | -0.04 | 0 DVLGSSVGFVETLESLSQLR                       |
| 207 - 222   | 2063.90  | 2062.90   | 2062.91   | -0.01 | 1 MYVTMDRYENDWDVVK                           |
| 223 - 236   | 1589.77  | 1588.76   | 1588.80   | -0.04 | 1 RGWDAQVLGEAPYK                             |
| 237 - 245   | 1005.53  | 1004.52   | 1004.53   | -0.01 | 0 FQNAVEAVK                                  |
| 253 - 269   | 1864.88  | 1863.88   | 1863.93   | -0.05 | 0 ASDQYLPFVIVDESGK                           |
| 270 - 286   | 1778.87  | 1777.87   | 1777.90   | -0.03 | 0 SVGPVVDGDAVVTFNFR                          |
| 296 - 307   | 1489.66  | 1488.66   | 1488.69   | -0.03 | 1 ALEYADFDKFDLR                              |
| 315 - 326   | 1387.64  | 1386.64   | 1386.65   | -0.01 | 0 YAGMLQYDGLK                                |
| 327 - 340   | 1636.83  | 1635.83   | 1635.86   | -0.03 | 0 LPSHYLVSPPEIER                             |
| 341 - 348   | 896.46   | 895.46    | 895.47    | -0.00 | 0 TSGEYLVK                                   |
| 362 - 373   | 1481.65  | 1480.65   | 1480.70   | -0.05 | 0 FGHVTFWNGNR                                |

# Spot 1508

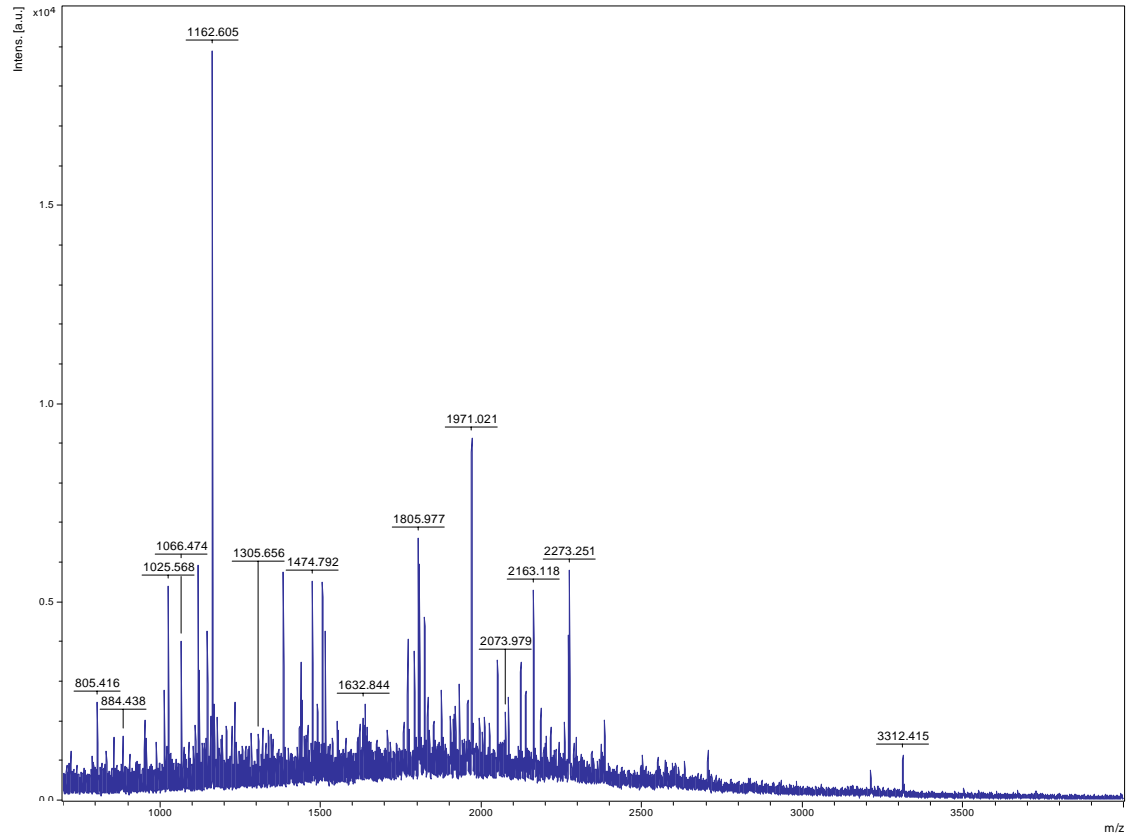

Match to: gi|57900359 Score: 82 Expect: 0.00039

## Matched peptides:

| Start - End | Observed  | Mr (expt) | Mr (calc) | Delta   | Miss Sequence                                                                      |
|-------------|-----------|-----------|-----------|---------|------------------------------------------------------------------------------------|
| 4 - 12      | 1148.5921 | 1147.5848 | 1147.6250 | -0.0402 | 1 K.FSVRGIWQR.W                                                                    |
| 24 - 40     | 1914.9092 | 1913.9019 | 1913.9193 | -0.0173 | 0 K.NDEAITVFTGVPTMYTR.L                                                            |
| 24 - 40     | 1930.9176 | 1929.9103 | 1929.9142 | -0.0039 | 0 K.NDEAITVFTGVPTMYTR.L Oxidation (M)                                              |
| 41 - 61     | 2243.0518 | 2242.0445 | 2242.0211 | 0.0234  | 0 R.LLQGYDGMPEQQSASSFAAK.Q                                                         |
| 62 - 79     | 1946.0034 | 1944.9961 | 1944.9657 | 0.0304  | 1 K.QLRLMCMCGSSALPSPMK.R Pyro-glu (N-term Q)                                       |
| 62 - 79     | 1961.9378 | 1960.9305 | 1960.9606 | -0.0301 | 1 K.QLRLMCMCGSSALPSPMK.R Oxidation (M); Pyro-glu (N-term Q)                        |
| 62 - 79     | 2003.1492 | 2002.1419 | 2001.9872 | 0.1547  | 1 K.QLRLMCMCGSSALPSPMK.R Carbamidomethyl (C); Pyro-glu (N-term Q)                  |
| 62 - 79     | 2051.0028 | 2049.9955 | 2049.9719 | 0.0236  | 1 K.QLRLMCMCGSSALPSPMK.R Carbamidomethyl (C); 3 Oxidation (M); Pyro-glu (N-term Q) |
| 65 - 79     | 1654.8317 | 1653.8244 | 1653.7598 | 0.0646  | 0 R.LMCMCGSSALPSPMK.R Carbamidomethyl (C); 2 Oxidation (M)                         |
| 81 - 88     | 1013.4459 | 1012.4386 | 1012.4726 | -0.0340 | 0 R.WEEVTGHR.L                                                                     |
| 93 - 110    | 2009.9777 | 2008.9704 | 2008.9498 | 0.0206  | 0 R.YGMTEFVMALSNPLHGAR.K Oxidation (M)                                             |
| 93 - 110    | 2025.9648 | 2024.9575 | 2024.9447 | 0.0128  | 0 R.YGMTEFVMALSNPLHGAR.K 2 Oxidation (M)                                           |
| 126 - 144   | 2122.9958 | 2121.9885 | 2121.9922 | -0.0036 | 0 K.IIMEDGAETTSEVGELCIR.S Carbamidomethyl (C)                                      |
| 126 - 144   | 2138.9672 | 2137.9599 | 2137.9871 | -0.0272 | 0 K.IIMEDGAETTSEVGELCIR.S Carbamidomethyl (C); Oxidation (M)                       |
| 155 - 170   | 1771.8642 | 1770.8569 | 1770.8828 | -0.0258 | 0 R.KPEVTAESFIDGGFFK.T                                                             |
| 171 - 188   | 1970.9530 | 1969.9457 | 1969.9632 | -0.0175 | 0 K.TGDTVTVDDGYFIILGR.T                                                            |
| 246 - 265   | 2216.1755 | 2215.1682 | 2215.1848 | -0.0166 | 1 K.RAELDSKPALTLEALTSWSK.D                                                         |
| 247 - 265   | 2060.0730 | 2059.0657 | 2059.0837 | -0.0180 | 0 R.AELDSKPALTLEALTSWSK.D                                                          |
| 277 - 285   | 1162.6078 | 1161.6005 | 1161.6182 | -0.0177 | 0 R.LYLWDSLPR.N                                                                    |



## Spot 1511

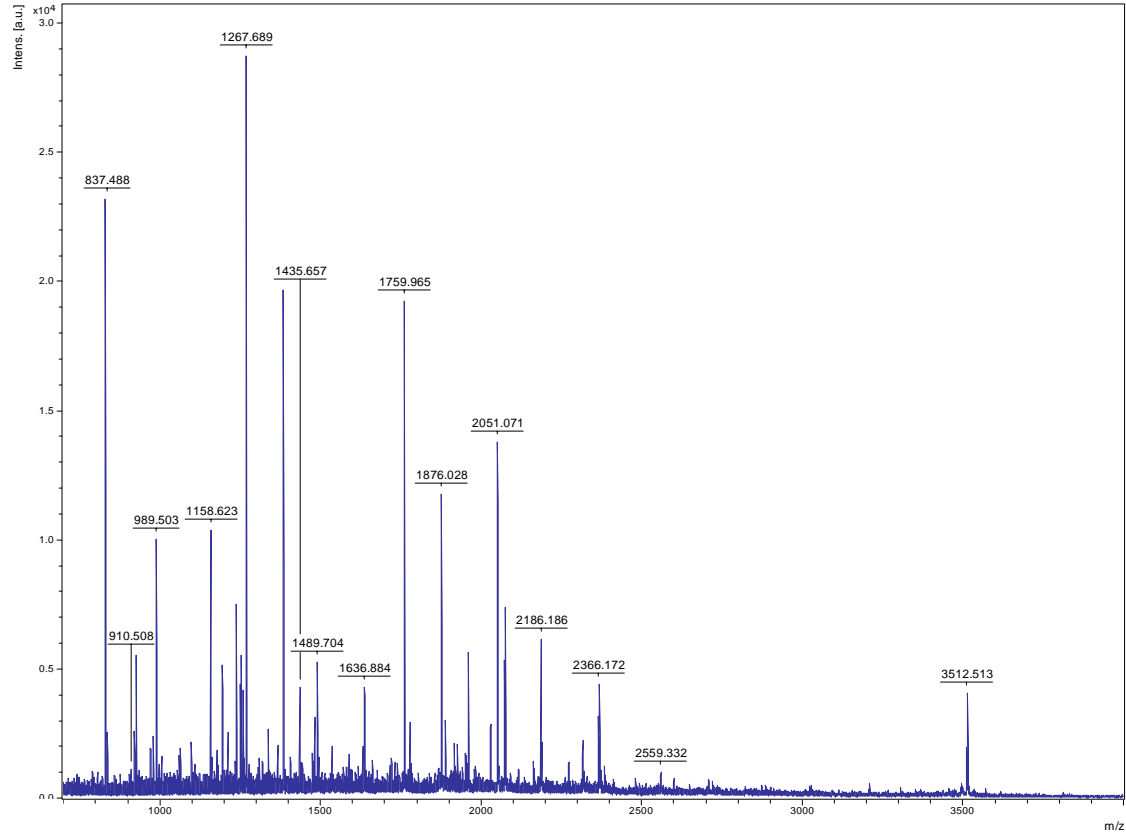

Match to: gi|110815966 Score: 66 Expect: 0.018

### Matched peptides:

| Start - End | Observed  | Mr (expt) | Mr (calc) | Delta   | Miss Sequence                                  |
|-------------|-----------|-----------|-----------|---------|------------------------------------------------|
| 85 - 103    | 2073.9465 | 2072.9393 | 2072.9043 | 0.0349  | 0 R.LVGCCELNAGYAADGYAR.A 2 Carbamidomethyl (C) |
| 152 - 167   | 1876.0276 | 1875.0203 | 1875.0002 | 0.0201  | 0 R.ILHHTIGLPDFSQELR.C                         |
| 222 - 231   | 1158.6228 | 1157.6155 | 1157.6233 | -0.0078 | 0 R.DPVPFPLAPR.L                               |
| 236 - 251   | 1721.9014 | 1720.8941 | 1720.8705 | -0.0236 | 0 K.MGLEAAVEATVEFLNK.A                         |
| 347 - 354   | 925.5385  | 924.5312  | 924.5392  | -0.0081 | 0 K.AIIVQPER.V                                 |
| 382 - 391   | 1259.5875 | 1258.5802 | 1258.5942 | -0.0139 | 1 K.NTTAYENYKR.I                               |
| 392 - 409   | 2051.0706 | 2050.0633 | 2050.0370 | -0.0262 | 0 R.IFVPEGQLESEPNELR.V                         |
| 410 - 419   | 1211.6281 | 1210.6208 | 1210.7186 | -0.0978 | 1 R.VNVLFKLVQK.M                               |
| 529 - 545   | 1887.9186 | 1886.9113 | 1886.8911 | -0.0203 | 0 K.NWNVTGLVDAIHNGEGK.C                        |
| 581 - 593   | 1535.7467 | 1534.7394 | 1534.7263 | -0.0131 | 1 K.DDTSKELLEWGSR.V                            |
| 586 - 593   | 989.5029  | 988.4957  | 988.4978  | -0.0021 | 0 K.ELLEWGSR.V                                 |
| 594 - 605   | 1237.6135 | 1236.6062 | 1236.6211 | -0.0148 | 0 R.VSAANSRPPNPQ.-                             |

# Spot 1512

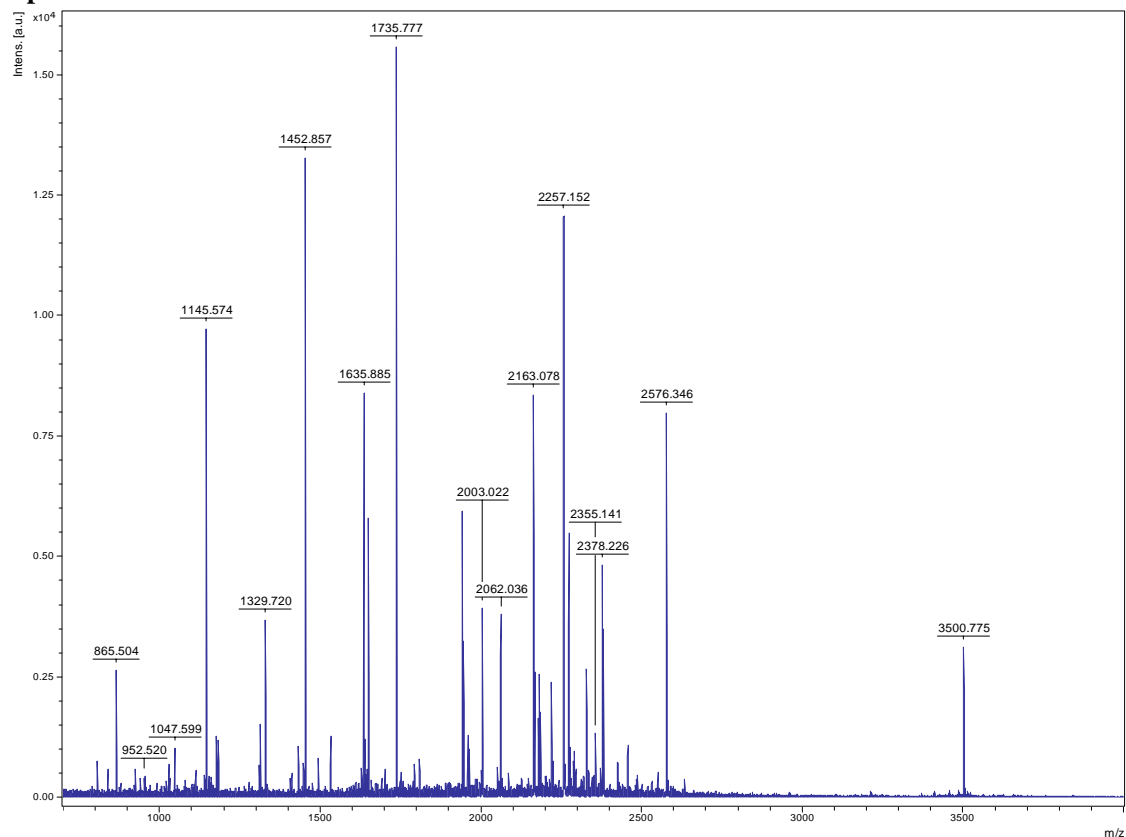

Match to: gi|77548611; Score: 419

## Matched peptides:

| Start - End | Observed | Mr (expt) | Mr (calc) | Delta | Miss Sequence                           |
|-------------|----------|-----------|-----------|-------|-----------------------------------------|
| 35 - 57     | 2166.09  | 2165.09   | 2165.11   | -0.02 | 1 AAAPRFSHGLATAAAAANPSASR               |
| 77 - 84     | 1030.56  | 1029.56   | 1029.54   | 0.03  | 0 RPEYVPINR                             |
| 77 - 92     | 2003.02  | 2002.02   | 2002.00   | 0.02  | 1 RPEYVPIRIDDPNVYR                      |
| 85 - 92     | 991.52   | 990.52    | 990.48    | 0.04  | 0 IDDPNVYR                              |
| 93 - 99     | 865.50   | 864.50    | 864.47    | 0.03  | 0 IFDTTLR                               |
| 93 - 114    | 2355.14  | 2354.14   | 2354.11   | 0.03  | 1 IFDTTLRDGGEQSPGATMTSAEK               |
| 93 - 114    | 2371.14  | 2370.14   | 2370.10   | 0.04  | 1 IFDTTLRDGGEQSPGATMTSAEK Oxidation (M) |
| 124 - 145   | 2257.15  | 2256.15   | 2256.13   | 0.02  | 0 LGVDIIEAGFPASSPDDLDAVR                |
| 146 - 170   | 2576.35  | 2575.34   | 2575.31   | 0.04  | 0 SIAIEVGNTPVGEDGHVPVICGLSR             |
| 175 - 184   | 1145.57  | 1144.57   | 1144.55   | 0.02  | 0 DIDAAWEAVR                            |
| 191 - 205   | 1792.94  | 1791.94   | 1791.91   | 0.03  | 0 IHFIATSEIHMQHK                        |
| 191 - 205   | 1808.92  | 1807.92   | 1807.90   | 0.01  | 0 IHFIATSEIHMQHK Oxidation (M)          |
| 208 - 218   | 1183.72  | 1182.72   | 1182.70   | 0.02  | 1 KTPQVVAIAK                            |
| 219 - 225   | 839.43   | 838.43    | 838.40    | 0.02  | 0 EMVAYAR                               |
| 226 - 241   | 1735.78  | 1734.77   | 1734.75   | 0.02  | 0 SLGCPDVEFSPEDAGR                      |
| 245 - 256   | 1532.85  | 1531.85   | 1531.83   | 0.02  | 0 EFLYHILEEVIK                          |
| 257 - 278   | 2328.19  | 2327.19   | 2327.17   | 0.02  | 0 AGATTLNIPDVTGYTLPEYFGK                |
| 285 - 319   | 3500.78  | 3499.77   | 3499.72   | 0.05  | 0 ANTPGIENAIISTHCQNDLGLATANTLAGAHAGAR   |
| 320 - 331   | 1311.70  | 1310.70   | 1310.68   | 0.01  | 0 QLEVTINGIGER Pyro-glu (N-term Q)      |
| 320 - 331   | 1328.73  | 1327.73   | 1327.71   | 0.02  | 0 QLEVTINGIGER                          |
| 332 - 345   | 1431.76  | 1430.76   | 1430.74   | 0.02  | 0 AGNASLEEVVMAIK                        |
| 332 - 345   | 1447.77  | 1446.76   | 1446.74   | 0.03  | 0 AGNASLEEVVMAIK Oxidation (M)          |
| 349 - 368   | 2163.08  | 2162.08   | 2162.10   | -0.03 | 0 ELLGGLYTGINTQHITMSSK                  |
| 349 - 368   | 2179.14  | 2178.14   | 2178.10   | 0.04  | 0 ELLGGLYTGINTQHITMSSK Oxidation (M)    |
| 369 - 382   | 1626.84  | 1625.83   | 1625.81   | 0.02  | 0 MVQEHSGLHVQPHK                        |
| 383 - 403   | 2182.09  | 2181.09   | 2181.06   | 0.02  | 0 AIVGANAFAHESGIHQDGLMK Oxidation (M)   |
| 383 - 405   | 2457.26  | 2456.26   | 2456.23   | 0.03  | 1 AIVGANAFAHESGIHQDGLMKYK               |
| 406 - 420   | 1649.85  | 1648.85   | 1648.83   | 0.02  | 0 GTYEIISPDDIGLTR                       |
| 421 - 430   | 1047.60  | 1046.60   | 1046.58   | 0.02  | 0 ANEFGIVLGR                            |
| 441 - 458   | 2222.08  | 2221.08   | 2221.08   | -0.00 | 1 LVELGYEITDKFEFFFK                     |
| 469 - 487   | 2218.13  | 2217.13   | 2217.12   | 0.01  | 1 RVTDIEDIEALLSDEIFQPK                  |
| 470 - 487   | 2062.04  | 2061.03   | 2061.02   | 0.02  | 0 VTDEDIEALLSDEIFQPK                    |
| 488 - 510   | 2425.27  | 2424.27   | 2424.24   | 0.03  | 0 VFVSLADVQATCGTGLSTATVK                |
| 520 - 534   | 1492.76  | 1491.76   | 1491.74   | 0.02  | 0 IACAVGTGPVDAAYK                       |
| 535 - 547   | 1452.86  | 1451.85   | 1451.83   | 0.02  | 0 AVDDIIQIPTVLR                         |
| 548 - 565   | 1944.94  | 1943.94   | 1943.91   | 0.03  | 0 EYSMTSVTEGIDAIATTR                    |
| 548 - 565   | 1960.94  | 1959.94   | 1959.91   | 0.03  | 0 EYSMTSVTEGIDAIATTR Oxidation (M)      |
| 577 - 586   | 1112.59  | 1111.58   | 1111.55   | 0.03  | 0 HALTGHSFSR                            |
| 587 - 603   | 1635.89  | 1634.88   | 1634.86   | 0.02  | 0 AFSGSGAALDIVVSSVR                     |
| 612 - 620   | 939.53   | 938.52    | 938.49    | 0.03  | 0 MSSFVGAIK                             |
| 612 - 620   | 955.52   | 954.51    | 954.48    | 0.03  | 0 MSSFVGAIK Oxidation (M)               |
| 621 - 630   | 1079.52  | 1078.52   | 1078.49   | 0.03  | 0 ASSEVSESQR                            |

## Spot 1518

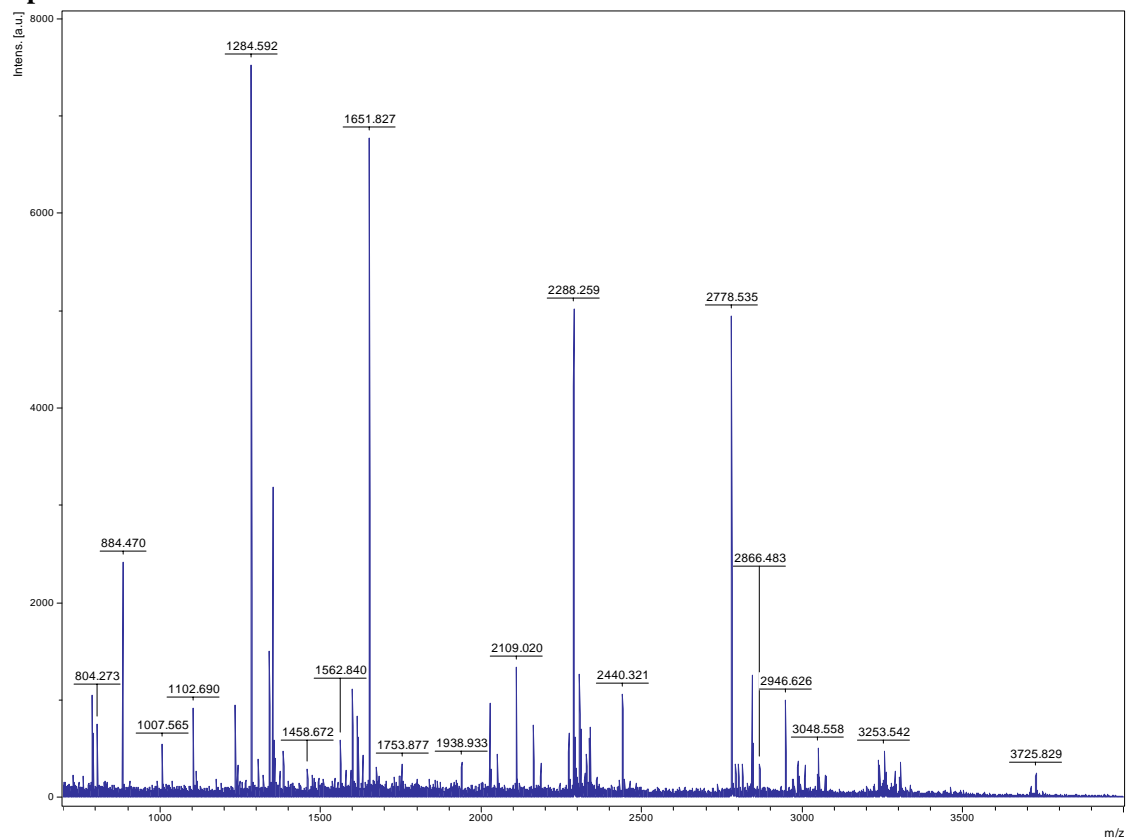

Match to: [gi|52076758](#); Score: 276

### Matched peptides:

| Start - End | Observed | Mr (expt) | Mr (calc) | Delta | Miss Sequence                                   |
|-------------|----------|-----------|-----------|-------|-------------------------------------------------|
| 26 - 37     | 1339.69  | 1338.69   | 1338.68   | 0.01  | 0 LASVYSEVQTSR                                  |
| 40 - 49     | 1102.69  | 1101.69   | 1101.67   | 0.02  | 0 HALPLPSVLR                                    |
| 50 - 71     | 2028.03  | 2027.03   | 2027.00   | 0.03  | 0 SPFALADGPASSAAGNPGEIAK                        |
| 72 - 97     | 2778.54  | 2777.53   | 2777.51   | 0.02  | 0 LFPNLFQGQPSVSLVPSPEPASTRPLK                   |
| 98 - 126    | 3048.56  | 3047.56   | 3047.52   | 0.04  | 0 VGVVLSGGQAPGGHNVICGIFDYLQEYAK                 |
| 145 - 157   | 1651.83  | 1650.82   | 1650.79   | 0.03  | 0 YVELTADYVYPYR                                 |
| 158 - 169   | 1341.59  | 1340.59   | 1340.56   | 0.03  | 0 NQGGFDMICSGR                                  |
| 180 - 213   | 3725.83  | 3724.83   | 3724.79   | 0.04  | 1 QAEDTVNKLDDGLVVIGGDSNTNACLLAEYFR              |
| 236 - 248   | 1458.67  | 1457.67   | 1457.65   | 0.02  | 0 EVPTSFGFDTACK                                 |
| 249 - 262   | 1599.78  | 1598.77   | 1598.74   | 0.03  | 0 IYSEMIGNVMTDAR                                |
| 249 - 262   | 1615.76  | 1614.76   | 1614.74   | 0.02  | 0 IYSEMIGNVMTDAR Oxidation (M)                  |
| 249 - 262   | 1631.77  | 1630.76   | 1630.73   | 0.03  | 0 IYSEMIGNVMTDAR 2 Oxidation (M)                |
| 267 - 272   | 884.47   | 883.47    | 883.43    | 0.03  | 0 YYHFVR                                        |
| 277 - 303   | 2843.50  | 2842.50   | 2842.46   | 0.04  | 0 AASHITLICALQTHPNVALIGEEVAAK                   |
| 321 - 346   | 2946.63  | 2945.62   | 2945.59   | 0.03  | 1 RAELGYNYGVILPEGLIDFPIEVQK                     |
| 322 - 346   | 2790.48  | 2789.48   | 2789.49   | -0.01 | 0 AELGYNYGVILPEGLIDFPIEVQK                      |
| 347 - 367   | 2306.22  | 2305.22   | 2305.20   | 0.02  | 0 LIAELNEILAHDVVDEAGAWK                         |
| 376 - 383   | 1007.57  | 1006.56   | 1006.55   | 0.01  | 0 QLFDFLPK                                      |
| 384 - 393   | 1242.71  | 1241.70   | 1241.70   | 0.01  | 0 TIQEQLLER                                     |
| 384 - 403   | 2288.26  | 2287.26   | 2287.23   | 0.03  | 1 TIQEQLLERDPHGNVQVAK                           |
| 409 - 421   | 1562.84  | 1561.84   | 1561.82   | 0.02  | 1 MLIAMVETEKR                                   |
| 433 - 443   | 1284.59  | 1283.59   | 1283.57   | 0.02  | 0 GQSHFFGYEGR                                   |
| 444 - 470   | 2985.39  | 2984.39   | 2984.35   | 0.04  | 0 CGLPTIFDSNYCYALGYSGALLQCGK                    |
| 526 - 536   | 1351.72  | 1350.72   | 1350.69   | 0.02  | 1 FASLRDEWSLK                                   |
| 537 - 567   | 3253.54  | 3252.54   | 3252.51   | 0.03  | 0 NHYISPGPIQFSGPGSNDANHTLMLELGAEA Oxidation (M) |

### Spot 1523

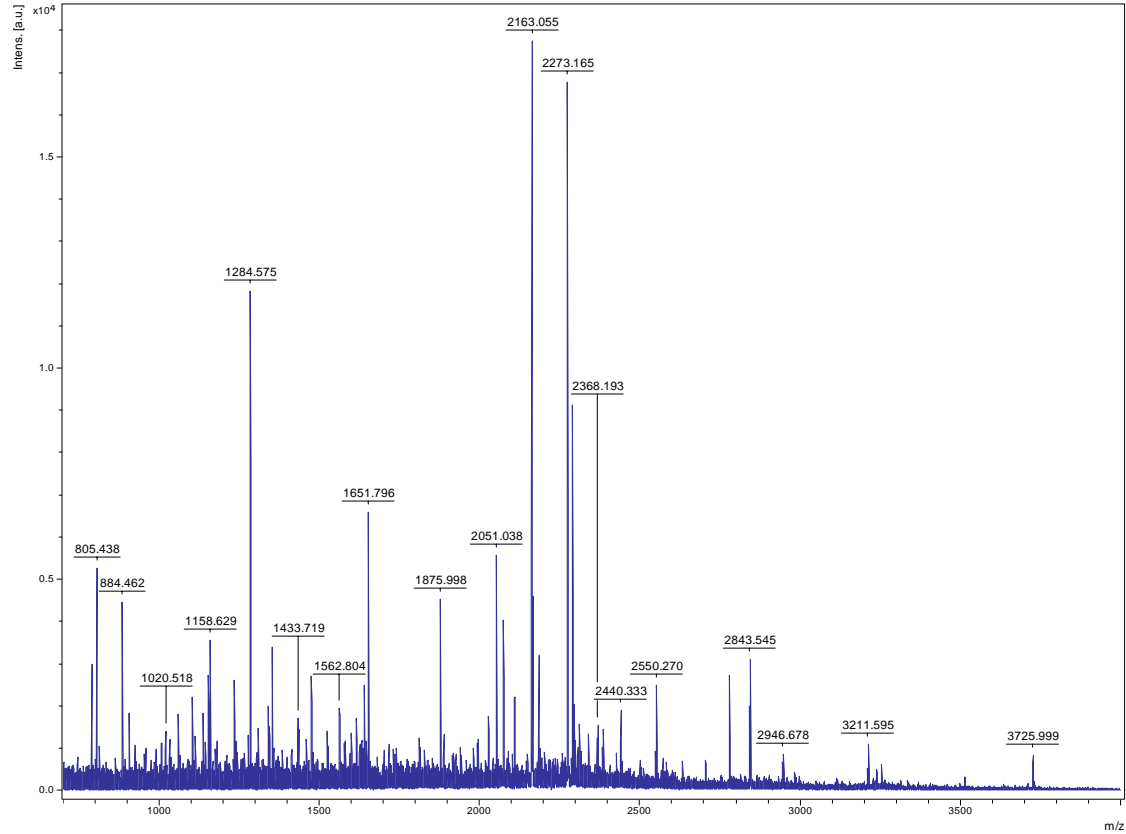

Match to: gi|50931897; Score: 108

#### Matched peptides:

| Start - End | Observed | Mr (expt) | Mr (calc) | Delta | Miss Sequence                  |
|-------------|----------|-----------|-----------|-------|--------------------------------|
| 131 - 144   | 1431.73  | 1430.72   | 1430.74   | -0.01 | 1 SVGDLTAADLEGKR               |
| 149 - 166   | 2028.94  | 2027.93   | 2027.94   | -0.01 | 0 ADLNPLDDNQNTTDDTR            |
| 169 - 179   | 1230.73  | 1229.72   | 1229.74   | -0.01 | 0 AAIPTIYLIK                   |
| 194 - 221   | 3004.59  | 3003.59   | 3003.61   | -0.03 | 1 AEDVIGPDVEKLVSELPNGSVLLLENVR |
| 236 - 254   | 2062.06  | 2061.06   | 2061.06   | -0.00 | 1 KLASLADLYVNDAFGTAHR          |
| 237 - 254   | 1933.97  | 1932.96   | 1932.97   | -0.01 | 0 LASLADLYVNDAFGTAHR           |
| 265 - 277   | 1447.84  | 1446.84   | 1446.86   | -0.02 | 0 FLKPSVAGFLLQK                |
| 278 - 290   | 1377.69  | 1376.69   | 1376.72   | -0.03 | 0 ELDYLVGAVSSPK                |
| 291 - 301   | 1102.62  | 1101.62   | 1101.63   | -0.01 | 0 RPFAAIVGGSK                  |

## Spot 1526

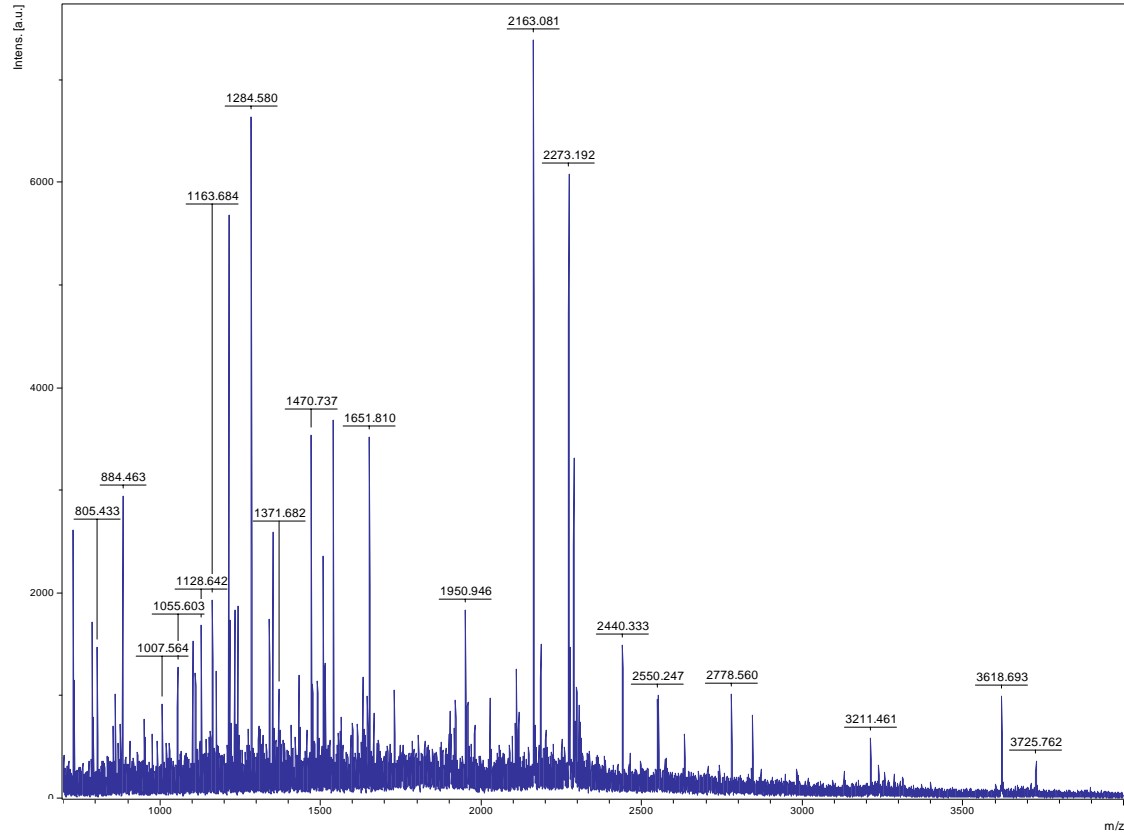

Match to: gi|52076758 Score: 114 Expect: 2.7e-07

### Matched peptides:

| Start - End | Observed  | Mr (expt) | Mr (calc) | Delta   | Miss Sequence                           |                                  |
|-------------|-----------|-----------|-----------|---------|-----------------------------------------|----------------------------------|
| 2 - 25      | 2108.0235 | 2107.0162 | 2107.0042 | 0.0121  | 0 M.AAAVAANGGGDGAQASNAPAPTR.L           | Acetyl (N-term)                  |
| 40 - 49     | 1102.6748 | 1101.6675 | 1101.6658 | 0.0017  | 0 K.HALPLPSVLR.S                        |                                  |
| 50 - 71     | 2028.0031 | 2026.9958 | 2026.9959 | -0.0001 | 0 R.SPFALADGPASSAAGNPGEIAK.L            |                                  |
| 72 - 97     | 2778.4979 | 2777.4906 | 2777.5115 | -0.0209 | 0 K.LFPNLFQGPSVSLVPSPEPASTRPLK.V        |                                  |
| 145 - 157   | 1651.8121 | 1650.8048 | 1650.7929 | 0.0119  | 0 K.YVELTADYVYPYR.N                     |                                  |
| 158 - 169   | 1341.5992 | 1340.5919 | 1340.5601 | 0.0318  | 0 R.NQGGFDMICSGR.D                      | Carbamidomethyl (C)              |
| 180 - 213   | 3725.6721 | 3724.6648 | 3724.7889 | -0.1241 | 1 K.QAEDTVNKLDDLGLVVIGDDSNNTNACLAEYFR.G | Carbamidomethyl (C)              |
| 249 - 262   | 1599.7838 | 1598.7765 | 1598.7432 | 0.0333  | 0 K.IYSEMIGNVMTDAR.S                    |                                  |
| 249 - 262   | 1615.7659 | 1614.7586 | 1614.7381 | 0.0205  | 0 K.IYSEMIGNVMTDAR.S                    | Oxidation (M)                    |
| 249 - 262   | 1631.8066 | 1630.7993 | 1630.7330 | 0.0663  | 0 K.IYSEMIGNVMTDAR.S                    | 2 Oxidation (M)                  |
| 267 - 272   | 884.4143  | 883.4070  | 883.4340  | -0.0270 | 0 K.YYHFVRL                             |                                  |
| 277 - 303   | 2843.3957 | 2842.3884 | 2842.4646 | -0.0762 | 0 R.AASHITLLECALQTHPNVALIGEEVAAK.K      | Carbamidomethyl (C)              |
| 309 - 321   | 1554.7717 | 1553.7644 | 1553.7759 | -0.0115 | 1 K.SVTDYITDIVCKR.A                     | Acetyl (N-term)                  |
| 347 - 367   | 2306.2024 | 2305.1951 | 2305.1953 | -0.0002 | 0 K.LIAELNEILAHDVVDEAGAWK.S             |                                  |
| 376 - 383   | 1007.5414 | 1006.5341 | 1006.5487 | -0.0146 | 0 R.QLFDLPK.T                           |                                  |
| 384 - 393   | 1242.7159 | 1241.7086 | 1241.6979 | 0.0107  | 0 K.TIQEQLLLER.D                        |                                  |
| 384 - 403   | 2288.2566 | 2287.2493 | 2287.2284 | 0.0209  | 1 K.TIQEQLLLERDPHGNVQVAK.I              |                                  |
| 409 - 421   | 1636.8758 | 1635.8685 | 1635.8211 | 0.0474  | 1 K.MLIAMVETELEKR.K                     | Acetyl (N-term); 2 Oxidation (M) |
| 427 - 432   | 790.3408  | 789.3335  | 789.3922  | -0.0587 | 0 K.YPAHFR.G                            |                                  |
| 433 - 443   | 1284.5917 | 1283.5844 | 1283.5683 | 0.0162  | 0 R.GQSHFFGYEGR.C                       |                                  |
| 504 - 512   | 1111.5692 | 1110.5619 | 1110.6549 | -0.0930 | 1 R.HGKYKPVIK.K                         | Acetyl (N-term)                  |
| 526 - 536   | 1351.7204 | 1350.7131 | 1350.6932 | 0.0200  | 1 K.FASLRDEWSLK.N                       |                                  |

## Spot 1532

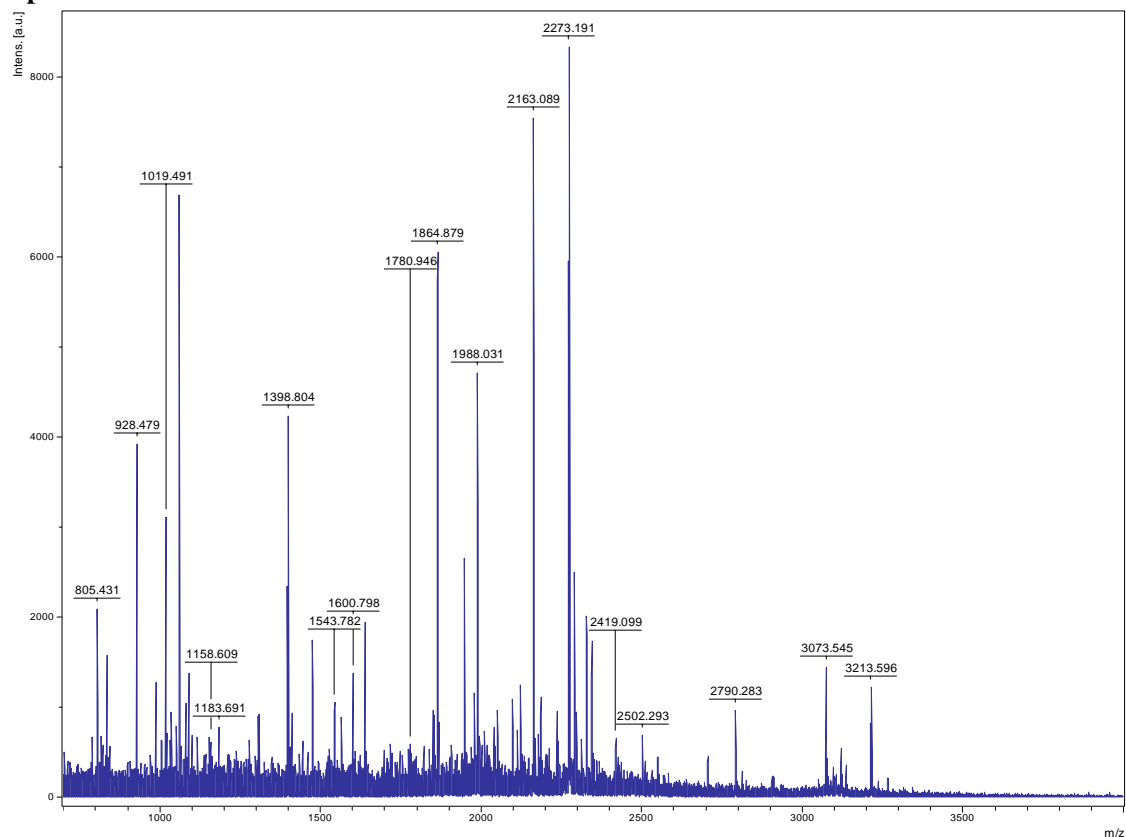

Match to: gi|78708007; Score: 181

### Matched peptides:

| Start - End | Observed | Mr (expt) | Mr (calc) | Delta | Miss Sequence                                 |
|-------------|----------|-----------|-----------|-------|-----------------------------------------------|
| 57 - 67     | 1183.69  | 1182.69   | 1182.66   | 0.03  | 0 SIPTKPVEGQK                                 |
| 115 - 126   | 1411.78  | 1410.77   | 1410.75   | 0.02  | 1 YFNKDAAQHTK                                 |
| 141 - 154   | 1397.82  | 1396.82   | 1396.80   | 0.01  | 0 NGLLSTPAVSAVIR                              |
| 181 - 208   | 3073.54  | 3072.54   | 3072.49   | 0.05  | 0 FNYSSGQPAPETITDQIYGNTLSISEIK                |
| 263 - 283   | 2328.17  | 2327.17   | 2327.13   | 0.04  | 0 FVFDAMHAVTGAYADPIFVEK                       |
| 263 - 283   | 2344.18  | 2343.18   | 2343.12   | 0.06  | 0 FVFDAMHAVTGAYADPIFVEK Oxidation (M)         |
| 314 - 337   | 2419.10  | 2418.10   | 2418.04   | 0.05  | 0 ELVFTMFGSGAPDFGAASDGGDGR                    |
| 314 - 343   | 3119.47  | 3118.47   | 3118.41   | 0.05  | 1 ELVFTMFGSGAPDFGAASDGGDRNMILGR Oxidation (M) |
| 377 - 386   | 1034.52  | 1033.52   | 1033.49   | 0.03  | 0 SMPTSGALDR                                  |
| 377 - 386   | 1050.50  | 1049.50   | 1049.48   | 0.02  | 0 SMPTSGALDR Oxidation (M)                    |
| 387 - 403   | 1947.06  | 1946.05   | 1946.03   | 0.02  | 1 VADKLVNVPFEVPTGWK                           |
| 404 - 413   | 1099.55  | 1098.55   | 1098.52   | 0.03  | 0 FFGNLM DAGK                                 |
| 404 - 413   | 1115.55  | 1114.54   | 1114.51   | 0.03  | 0 FFGNLM DAGK Oxidation (M)                   |
| 414 - 430   | 1864.88  | 1863.88   | 1863.84   | 0.03  | 0 LSICGEESFGTSDHIR                            |
| 414 - 432   | 2122.03  | 2121.03   | 2120.98   | 0.05  | 1 LSICGEESFGTSDHIREK                          |
| 458 - 466   | 987.57   | 986.57    | 986.54    | 0.03  | 0 LVSVEDVAR                                   |
| 458 - 474   | 1988.03  | 1987.03   | 1986.99   | 0.04  | 1 LVSVEDVAREHWATYGR                           |
| 467 - 474   | 1019.49  | 1018.49   | 1018.46   | 0.03  | 0 EHWATYGR                                    |
| 493 - 498   | 816.41   | 815.41    | 815.38    | 0.03  | 0 MMEHLR                                      |
| 510 - 534   | 2790.28  | 2789.28   | 2789.23   | 0.05  | 0 YGNYTLQFADDFSYTPDVGSTVSK                    |
| 539 - 546   | 928.48   | 927.48    | 927.44    | 0.03  | 0 FVFTDGR                                     |
| 596 - 602   | 836.48   | 835.47    | 835.46    | 0.02  | 1 LKDFDFTGR                                   |

## Spot 1536

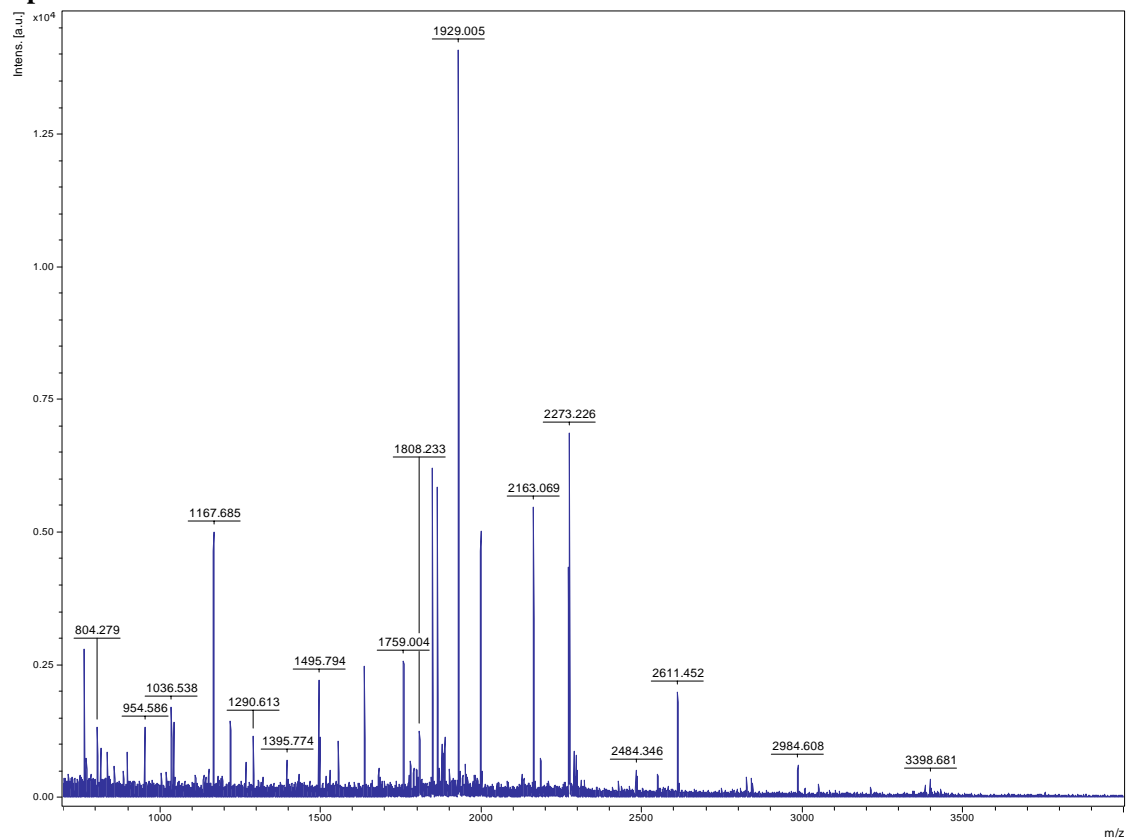

Match to: gi|77554291; Score: 256

### Matched peptides:

| Start - End | Observed | Mr (expt) | Mr (calc) | Delta | Miss Sequence                     |
|-------------|----------|-----------|-----------|-------|-----------------------------------|
| 41 - 47     | 836.42   | 835.42    | 835.41    | 0.01  | 0 DIAFDQK                         |
| 59 - 70     | 1167.69  | 1166.68   | 1166.68   | 0.01  | 0 LANAVGVTLGPR                    |
| 73 - 83     | 1220.61  | 1219.61   | 1219.61   | -0.00 | 0 NVVLDEYGSFK                     |
| 84 - 93     | 1043.59  | 1042.59   | 1042.58   | 0.01  | 0 VVNDGVTIAR                      |
| 94 - 110    | 1846.94  | 1845.94   | 1845.93   | 0.01  | 0 AIELYDPMENAGAALIR               |
| 94 - 110    | 1862.94  | 1861.93   | 1861.92   | 0.01  | 0 AIELYDPMENAGAALIR Oxidation (M) |
| 116 - 132   | 1636.78  | 1635.77   | 1635.77   | 0.00  | 0 TNDASAGDGTITASVLR               |
| 137 - 152   | 1555.90  | 1554.90   | 1554.90   | 0.00  | 0 LGLLSVTSGANPVSLK                |
| 158 - 168   | 1267.67  | 1266.67   | 1266.68   | -0.01 | 0 TVHGLIEELEK                     |
| 158 - 169   | 1395.77  | 1394.77   | 1394.78   | -0.01 | 1 TVHGLIEELEK                     |
| 233 - 245   | 1495.79  | 1494.79   | 1494.77   | 0.02  | 0 GYISPFVNTLEK                    |
| 246 - 254   | 1036.54  | 1035.54   | 1035.52   | 0.01  | 0 SIVEFENAK                       |
| 255 - 261   | 816.48   | 815.48    | 815.48    | 0.01  | 0 VLITDQK                         |
| 267 - 274   | 954.59   | 953.58    | 953.58    | 0.00  | 0 EILPILEK                        |
| 304 - 312   | 898.57   | 897.57    | 897.56    | 0.00  | 0 GILNVAAIK                       |
| 321 - 338   | 1887.10  | 1886.10   | 1886.09   | 0.01  | 1 KAVLQDIAIVTGAEFLLAK             |
| 322 - 338   | 1759.00  | 1758.00   | 1757.99   | 0.01  | 0 AVLQDIAIVTGAEFLLAK              |
| 339 - 356   | 1929.01  | 1928.00   | 1927.99   | 0.02  | 0 DLGLLVENATEEQLGTAR              |
| 387 - 403   | 1998.97  | 1997.97   | 1997.94   | 0.03  | 1 ELSETDSIYDTEKLAER               |
| 416 - 427   | 1290.61  | 1289.61   | 1289.61   | 0.00  | 0 VGAATETELEDK                    |
| 436 - 465   | 2984.61  | 2983.61   | 2983.57   | 0.04  | 0 NATFAAIEEGIVPGGGTAYVHLSTTVPAIK  |
| 475 - 482   | 857.52   | 856.52    | 856.50    | 0.02  | 0 LGADIIQK                        |
| 483 - 505   | 2273.23  | 2272.22   | 2272.24   | -0.02 | 0 ALVAPASLIAHNAGVEGEVVVEK         |

### Spot 1537

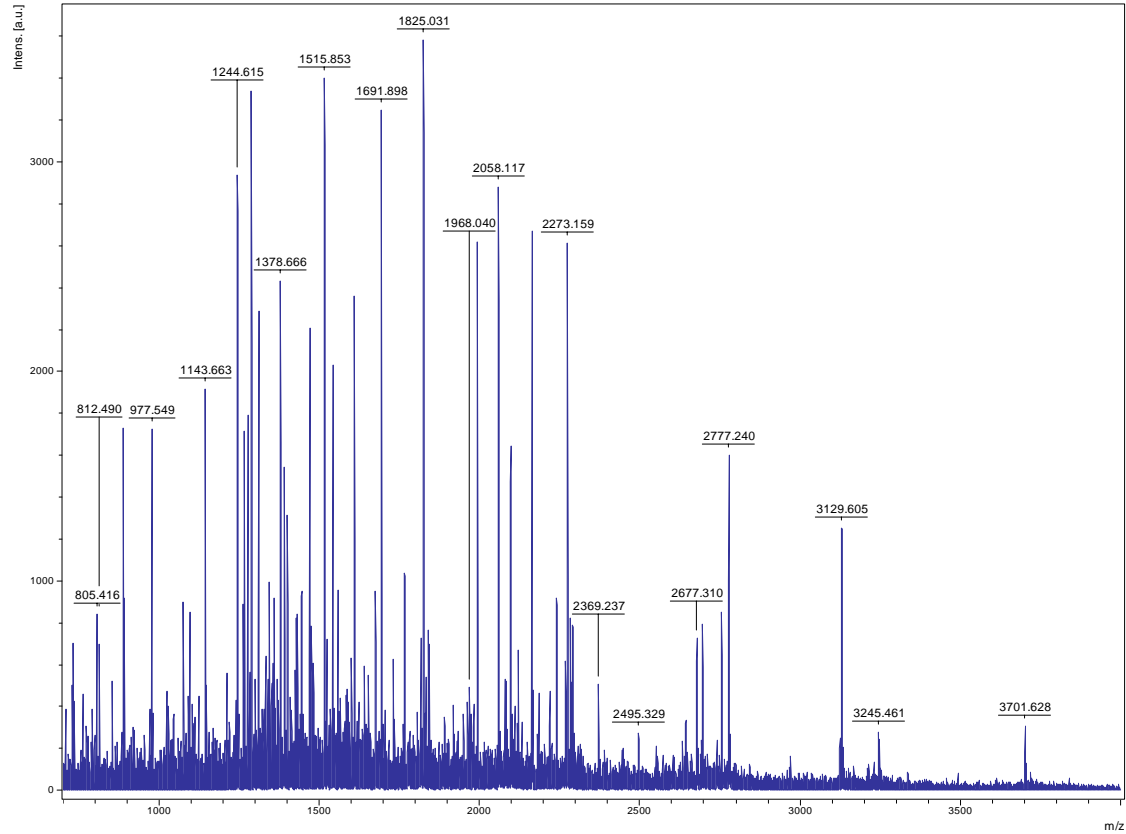

Match to: gi|5360657 Score: 90 Expect: 5.9e-05

#### Matched peptides:

| Start - End | Observed  | Mr (expt) | Mr (calc) | Delta   | Miss Sequence              |
|-------------|-----------|-----------|-----------|---------|----------------------------|
| 2 - 12      | 1198.7181 | 1197.7108 | 1197.7557 | -0.0449 | 1 M.ASLVLSLRIAR.S          |
| 28 - 34     | 732.3433  | 731.3360  | 731.3860  | -0.0500 | 1 R.RGAVACR.A              |
| 35 - 47     | 1389.7133 | 1388.7060 | 1388.7412 | -0.0351 | 0 R.AATFQQLDAVAVRE         |
| 35 - 52     | 1991.9445 | 1990.9372 | 1990.9959 | -0.0587 | 1 R.AATFQQLDAVAVREEESK.F   |
| 68 - 82     | 1790.8191 | 1789.8118 | 1789.9297 | -0.1179 | 1 K.RCIFSDHLTPVLAYR.C      |
| 91 - 111    | 2239.9262 | 2238.9189 | 2239.0392 | -0.1203 | 0 R.EAPSLFESVEQSGETNVGR.Y  |
| 112 - 126   | 1562.8145 | 1561.8072 | 1561.8173 | -0.0101 | 0 R.YSVVGAQPAIVEIVAK.A     |
| 141 - 150   | 1218.5583 | 1217.5510 | 1217.5863 | -0.0352 | 1 R.REQFADPMKI             |
| 142 - 153   | 1428.7105 | 1427.7032 | 1427.7231 | -0.0199 | 1 R.REQFADPMKIPR.S         |
| 203 - 223   | 2450.1308 | 2449.1235 | 2449.2641 | -0.1406 | 0 R.NLPDIHLGLYNDIVFDHVEK.K |
| 248 - 256   | 1043.5618 | 1042.5545 | 1042.5771 | -0.0225 | 0 K.NQLEALLSR.L            |
| 257 - 271   | 1522.8421 | 1521.8348 | 1521.8514 | -0.0166 | 0 R.LHSVNVPTLTAGSVK.L      |
| 284 - 292   | 1102.6484 | 1101.6411 | 1101.4760 | 0.1651  | 1 K.SSMSREDEYK.K           |
| 300 - 315   | 1824.9466 | 1823.9393 | 1823.9893 | -0.0500 | 0 K.EHILAGDIFQVLSQR.F      |
| 319 - 329   | 1400.6816 | 1399.6743 | 1399.6884 | -0.0141 | 1 R.RTFADPFVYR.A           |
| 320 - 329   | 1244.5831 | 1243.5758 | 1243.5873 | -0.0115 | 0 R.TFADPFVYR.A            |
| 333 - 346   | 1622.8411 | 1621.8338 | 1621.8286 | 0.0052  | 0 R.IVNPSPYMAYLQAR.G       |
| 365 - 376   | 1310.7866 | 1309.7793 | 1309.7830 | -0.0037 | 0 R.TIVNRPFLAGTIR.R        |
| 458 - 470   | 1167.6587 | 1166.6514 | 1166.6659 | -0.0144 | 0 R.AALPVGTVSGAPK.V        |
| 473 - 483   | 1264.5646 | 1263.5573 | 1263.5839 | -0.0265 | 0 R.AMELIDQMEGK.M          |
| 486 - 498   | 1287.5983 | 1286.5910 | 1286.6043 | -0.0133 | 0 R.GPYSGGFGVSR.F          |
| 499 - 508   | 1074.5408 | 1073.5335 | 1073.5539 | -0.0204 | 0 R.GDMDIALALR.T           |
| 509 - 517   | 977.5206  | 976.5133  | 976.5341  | -0.0208 | 0 R.TIVFPTGSR.F            |
| 518 - 527   | 1270.5105 | 1269.5032 | 1269.5223 | -0.0191 | 0 R.FDTMYSYTDK.N           |

Match to: gi|11995457 Score: 73 Expect: 0.0033

#### Matched peptides:

| Start - End | Observed  | Mr (expt) | Mr (calc) | Delta   | Miss Sequence                    |
|-------------|-----------|-----------|-----------|---------|----------------------------------|
| 7 - 20      | 1608.8631 | 1607.8558 | 1607.8783 | -0.0225 | 1 R.KHQFLAELGLAPR.N              |
| 8 - 20      | 1480.7596 | 1479.7523 | 1479.7834 | -0.0310 | 0 K.EHQFLAELGLAPR.N              |
| 72 - 80     | 1014.5434 | 1013.5361 | 1013.5368 | -0.0007 | 0 K.TWMAIPAPK.R                  |
| 82 - 93     | 1326.6974 | 1325.6901 | 1325.7415 | -0.0514 | 1 R.GEIVRQIGDALR.A               |
| 96 - 101    | 732.3433  | 731.3360  | 731.4191  | -0.0830 | 0 K.LHHLGR.L                     |
| 204 - 211   | 886.4993  | 885.4920  | 885.5283  | -0.0363 | 0 K.IVASVLER.N                   |
| 212 - 237   | 2638.2718 | 2637.2645 | 2637.2856 | -0.0211 | 0 R.NNLPGSIFTAFCGGADIGQAIQLDTR.I |
| 238 - 248   | 1149.6268 | 1148.6195 | 1148.6441 | -0.0246 | 0 R.IPLVSTFGSTK.V                |
| 249 - 260   | 1342.7113 | 1341.7040 | 1341.7186 | -0.0146 | 0 K.VGLMVQQQVNR.F                |
| 249 - 263   | 1674.8170 | 1673.8097 | 1673.9035 | -0.0937 | 1 K.VGLMVQQQVNRFGK.C             |
| 288 - 300   | 1276.7035 | 1275.6962 | 1275.6935 | 0.0028  | 0 R.SVLFVAAVGTAGQR.C             |
| 288 - 305   | 1840.7754 | 1839.7681 | 1839.9083 | -0.1402 | 1 R.SVLFVAAVGTAGQRCTTCR.R        |
| 306 - 315   | 1299.7478 | 1298.7405 | 1298.7459 | -0.0053 | 1 R.RLLHESIYR.T                  |
| 307 - 315   | 1143.6391 | 1142.6318 | 1142.6448 | -0.0129 | 0 R.LLLHESIYR.T                  |
| 316 - 326   | 1354.7116 | 1353.7043 | 1353.7180 | -0.0136 | 0 R.TFLDQLVEVYK.Q                |
| 330 - 349   | 2058.0232 | 2057.0159 | 2057.0905 | -0.0746 | 0 R.IGDPLENTLLGLHTPASR.D         |
| 433 - 439   | 888.4869  | 887.4796  | 887.5229  | -0.0432 | 0 K.RPDIIFK.W                    |
| 471 - 484   | 1378.6393 | 1377.6320 | 1377.6272 | 0.0048  | 1 K.ATGGGREGAGSDSWK.Q            |



## Spot 1540

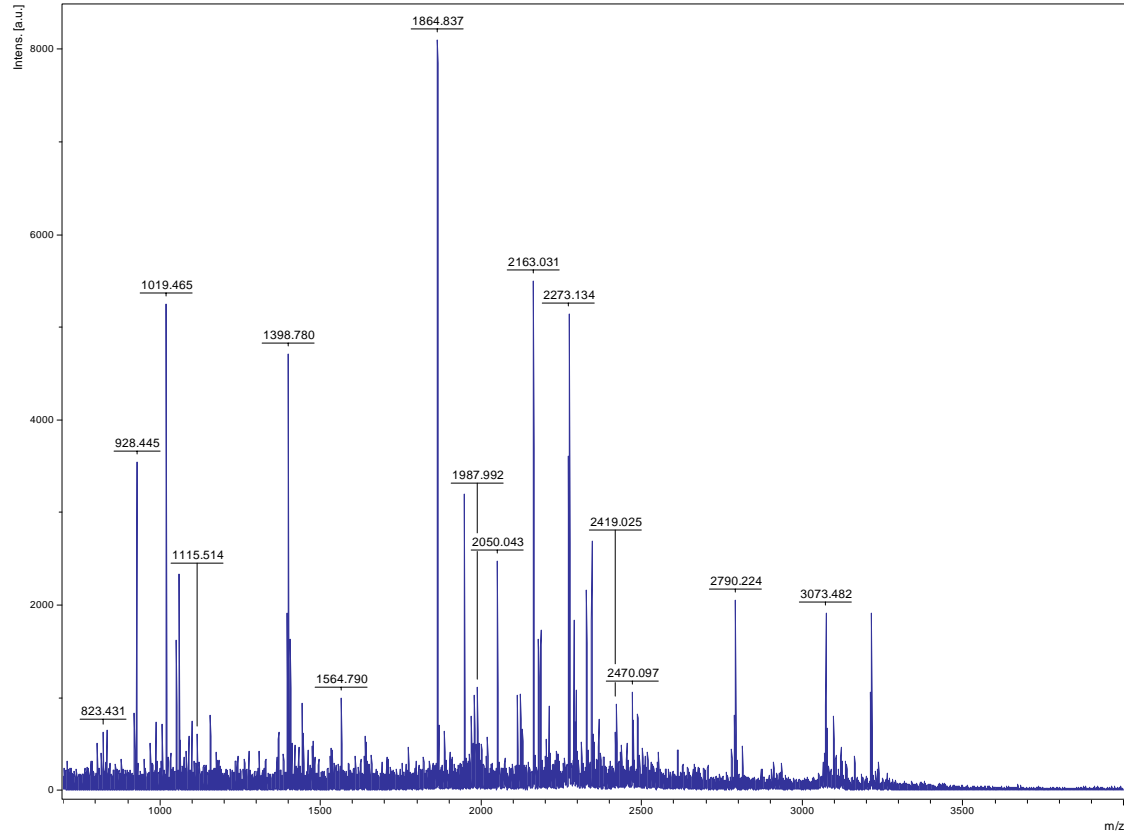

Match to: gi|78708007; Score: 138

### Matched peptides:

| Start - End | Observed | Mr (expt) | Mr (calc) | Delta | Miss Sequence                         |
|-------------|----------|-----------|-----------|-------|---------------------------------------|
| 141 - 154   | 1397.79  | 1396.78   | 1396.80   | -0.02 | 0 NGLLSTPAVSAVIR                      |
| 157 - 180   | 2470.10  | 2469.09   | 2469.11   | -0.02 | 0 QANGGFIMSASHNPGPDNDWGIK             |
| 181 - 208   | 3073.48  | 3072.48   | 3072.49   | -0.01 | 0 FNYSSGQPAPETITDQYGNLTSISEIK         |
| 263 - 283   | 2328.11  | 2327.11   | 2327.13   | -0.02 | 0 FVFDAMHAVTGAYADPIFVEK               |
| 263 - 283   | 2344.12  | 2343.11   | 2343.12   | -0.01 | 0 FVFDAMHAVTGAYADPIFVEK Oxidation (M) |
| 314 - 337   | 2419.03  | 2418.02   | 2418.04   | -0.02 | 0 ELVFTMFGSGAPDFGAASDGDGDR            |
| 387 - 403   | 1947.02  | 1946.02   | 1946.03   | -0.01 | 1 VADKLNVPFFVPTGWK                    |
| 404 - 413   | 1099.51  | 1098.51   | 1098.52   | -0.01 | 0 FFGNLMADAGK                         |
| 404 - 413   | 1115.51  | 1114.51   | 1114.51   | 0.00  | 0 FFGNLMADAGK Oxidation (M)           |
| 414 - 430   | 1864.84  | 1863.83   | 1863.84   | -0.01 | 0 LSICGEESFGTGDHIR                    |
| 414 - 432   | 2121.97  | 2120.97   | 2120.98   | -0.01 | 1 LSICGEESFGTGDHIREK                  |
| 458 - 466   | 987.54   | 986.54    | 986.54    | 0.00  | 0 LVSVEDVAR                           |
| 458 - 474   | 1987.99  | 1986.99   | 1986.99   | -0.01 | 1 LVSVEDVAREHWATYGR                   |
| 467 - 474   | 1019.46  | 1018.46   | 1018.46   | 0.00  | 0 EHWATYGR                            |
| 475 - 492   | 2274.88  | 2273.88   | 2273.92   | -0.04 | 1 NFFSRDYEECESESANK                   |
| 510 - 534   | 2790.22  | 2789.22   | 2789.23   | -0.01 | 0 YGNVTLQFADDFSYTDPVDGSTVSK           |
| 539 - 546   | 928.45   | 927.44    | 927.44    | -0.01 | 0 FVFTDGR                             |
| 596 - 602   | 836.46   | 835.46    | 835.46    | 0.00  | 1 LKDFDGR                             |

## Spot 1545

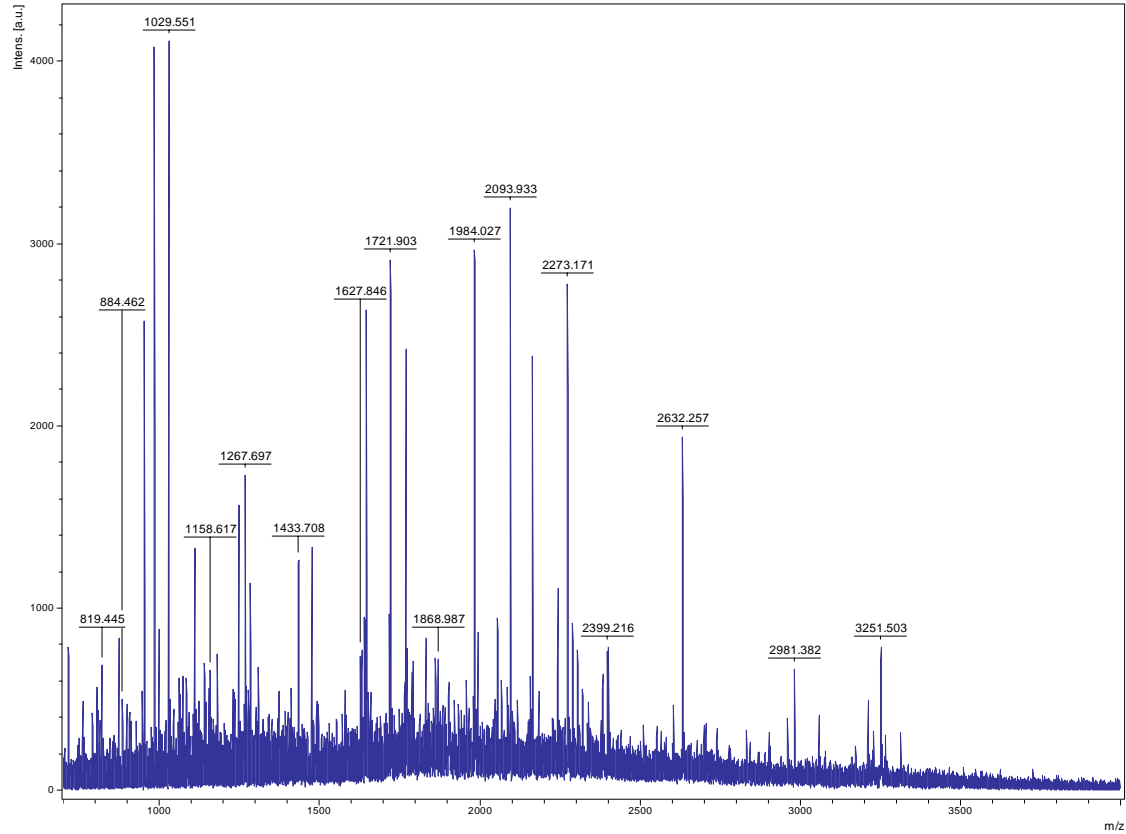

Match to: gi|34907404 Score: 68 Expect: 0.011

### Matched peptides:

| Start - End | Observed  | Mr (expt) | Mr (calc) | Delta   | Miss Sequence                                              |
|-------------|-----------|-----------|-----------|---------|------------------------------------------------------------|
| 188 - 194   | 873.3210  | 872.3137  | 872.3664  | -0.0527 | 0 R.YGDDTFR.W                                              |
| 195 - 202   | 984.4523  | 983.4450  | 983.4825  | -0.0374 | 0 R.WAPPQTER.D                                             |
| 203 - 224   | 2157.9910 | 2156.9837 | 2157.0014 | -0.0177 | 0 R.DGYWPPAAAGSAEDEDALGVPK.G                               |
| 241 - 262   | 2321.0765 | 2320.0692 | 2320.1044 | -0.0352 | 0 K.TVGEAVAAAPDYGDEMIFV VHVK.E Oxidation (M)               |
| 268 - 288   | 2185.0642 | 2184.0569 | 2184.1459 | -0.0890 | 1 K.ETVNVPLEKTNVVVVGDGMGK.T                                |
| 268 - 288   | 2243.0709 | 2242.0636 | 2242.1514 | -0.0878 | 1 K.ETVNVPLEKTNVVVVGDGMGK.T Acetyl (N-term); Oxidation (M) |
| 321 - 339   | 1983.9964 | 1982.9891 | 1982.9810 | -0.0082 | 0 R.DLTISNTAGPDAHQAQVAFR.S                                 |
| 345 - 365   | 2383.1357 | 2382.1284 | 2382.2001 | -0.0717 | 0 R.TVLDTVELLGHQDTLYAHAMR.Q                                |
| 345 - 365   | 2399.1509 | 2398.1436 | 2398.1951 | -0.0514 | 0 R.TVLDTVELLGHQDTLYAHAMR.Q Oxidation (M)                  |
| 373 - 389   | 1768.9483 | 1767.9410 | 1767.9155 | -0.0256 | 0 R.VSGTVDFVFGNSATVLR.D                                    |
| 390 - 398   | 997.5777  | 996.5704  | 996.5968  | -0.0263 | 0 R.DTALIVLPR.Q                                            |
| 399 - 415   | 1869.0026 | 1867.9953 | 1867.9500 | 0.0454  | 1 R.QLRPEKGENDAVTAQGR.T                                    |
| 416 - 427   | 1267.7174 | 1266.7101 | 1266.6932 | 0.0169  | 0 R.TDPAQPTGIVLR.G                                         |
| 443 - 457   | 1860.9622 | 1859.9549 | 1859.9794 | -0.0245 | 0 R.EKPDVHHVYLGRPWK.E                                      |
| 462 - 476   | 1721.9011 | 1720.8938 | 1720.8818 | 0.0121  | 0 R.TVYVGCTLSEIVQPR.G Carbamidomethyl (C)                  |
| 477 - 488   | 1411.6875 | 1410.6802 | 1410.6390 | 0.0412  | 0 R.GWMAWNGDFALK.T Oxidation (M)                           |
| 489 - 509   | 2093.9069 | 2092.8996 | 2092.8973 | -0.0023 | 0 K.TLYYGEYESAGPGDGDGASGSR.I                               |
| 519 - 538   | 2304.1489 | 2303.1416 | 2303.1586 | -0.0169 | 1 R.DHVDVYYSVASFQGDKWPK.I                                  |

## Spot 1547

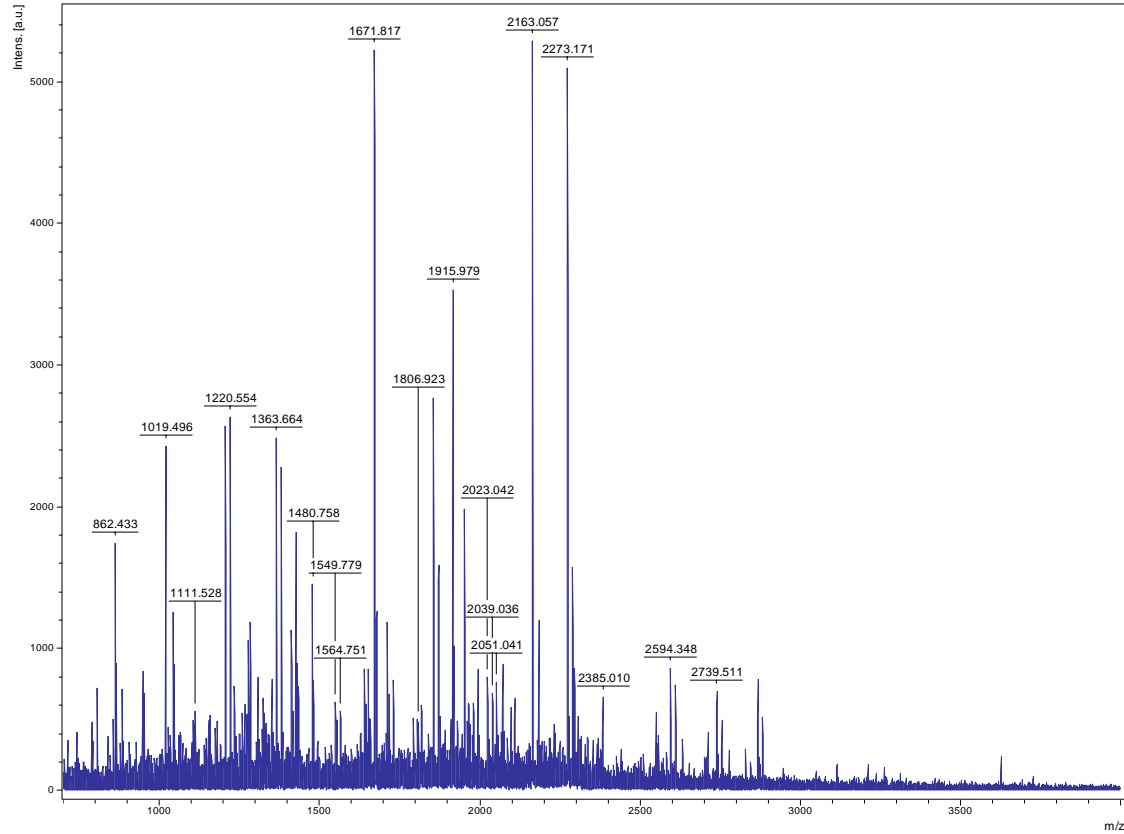

Match to: gi|3915054 Score: 97 Expect: 6.5e-05

### Matched peptides:

| Start - End | Observed  | Mr (expt) | Mr (calc) | Delta   | Miss Sequence                              |
|-------------|-----------|-----------|-----------|---------|--------------------------------------------|
| 20 - 37     | 1915.9790 | 1914.9717 | 1914.9799 | -0.0081 | 0 R.IGDLSAHTNELVAVFSR.L                    |
| 44 - 66     | 2594.3477 | 2593.3404 | 2593.2958 | 0.0446  | 1 K.GMLQPHQIAEYNAAIPEGEREK.L               |
| 44 - 66     | 2610.3430 | 2609.3357 | 2609.2907 | 0.0450  | 1 K.GMLQPHQIAEYNAAIPEGEREK.L Oxidation (M) |
| 157 - 167   | 1204.6123 | 1203.6050 | 1203.6360 | -0.0309 | 0 K.SIGNGVQFLNR.H                          |
| 173 - 188   | 2023.0420 | 2022.0347 | 2022.0396 | -0.0049 | 1 K.LFHDKESMYPLLNFLR.A                     |
| 173 - 188   | 2039.0365 | 2038.0292 | 2038.0346 | -0.0053 | 1 K.LFHDKESMYPLLNFLR.A Oxidation (M)       |
| 189 - 202   | 1729.7999 | 1728.7927 | 1728.7382 | -0.0545 | 1 R.AHNYKGMVMMLNDR.I 3 Oxidation (M)       |
| 205 - 214   | 1043.5397 | 1042.5324 | 1042.5771 | -0.0447 | 0 R.SLDALQGLR.K                            |
| 219 - 235   | 1951.9346 | 1950.9273 | 1950.9336 | -0.0063 | 0 K.HLAGITADTPYSEFHRF                      |
| 244 - 251   | 949.3570  | 948.3497  | 948.3872  | -0.0375 | 0 K.GWGDCAQR.V Carbamidomethyl (C)         |
| 317 - 325   | 1106.4968 | 1105.4896 | 1105.5260 | -0.0364 | 0 R.AMENEMLLR.I                            |
| 317 - 327   | 1363.6644 | 1362.6572 | 1362.6999 | -0.0427 | 1 R.AMENEMLLRIK.Q Oxidation (M)            |
| 317 - 327   | 1379.6639 | 1378.6567 | 1378.6948 | -0.0381 | 1 R.AMENEMLLRIK.Q 2 Oxidation (M)          |
| 326 - 336   | 1267.6914 | 1266.6841 | 1266.7408 | -0.0567 | 1 R.IKQQLNITPRI                            |
| 328 - 336   | 1026.5394 | 1025.5322 | 1025.5618 | -0.0296 | 0 K.QQQLNITPRI                             |
| 343 - 355   | 1425.6653 | 1424.6580 | 1424.6830 | -0.0250 | 0 R.LLPDAHGTTCGQR.L Carbamidomethyl (C)    |
| 370 - 380   | 1275.6719 | 1274.6646 | 1274.6731 | -0.0085 | 1 R.VPFRTEGTVR.K                           |
| 432 - 445   | 1549.7791 | 1548.7718 | 1548.8082 | -0.0364 | 0 K.LGVTHCTIAHALEK.T Carbamidomethyl (C)   |
| 446 - 456   | 1414.6581 | 1413.6508 | 1413.6928 | -0.0420 | 1 K.TKYPNSDLYWK.K                          |
| 524 - 545   | 2550.2578 | 2549.2505 | 2549.2260 | 0.0246  | 1 K.FNIVSPGADMSIYFPFTEKQR.L Oxidation (M)  |

## Spot 1549

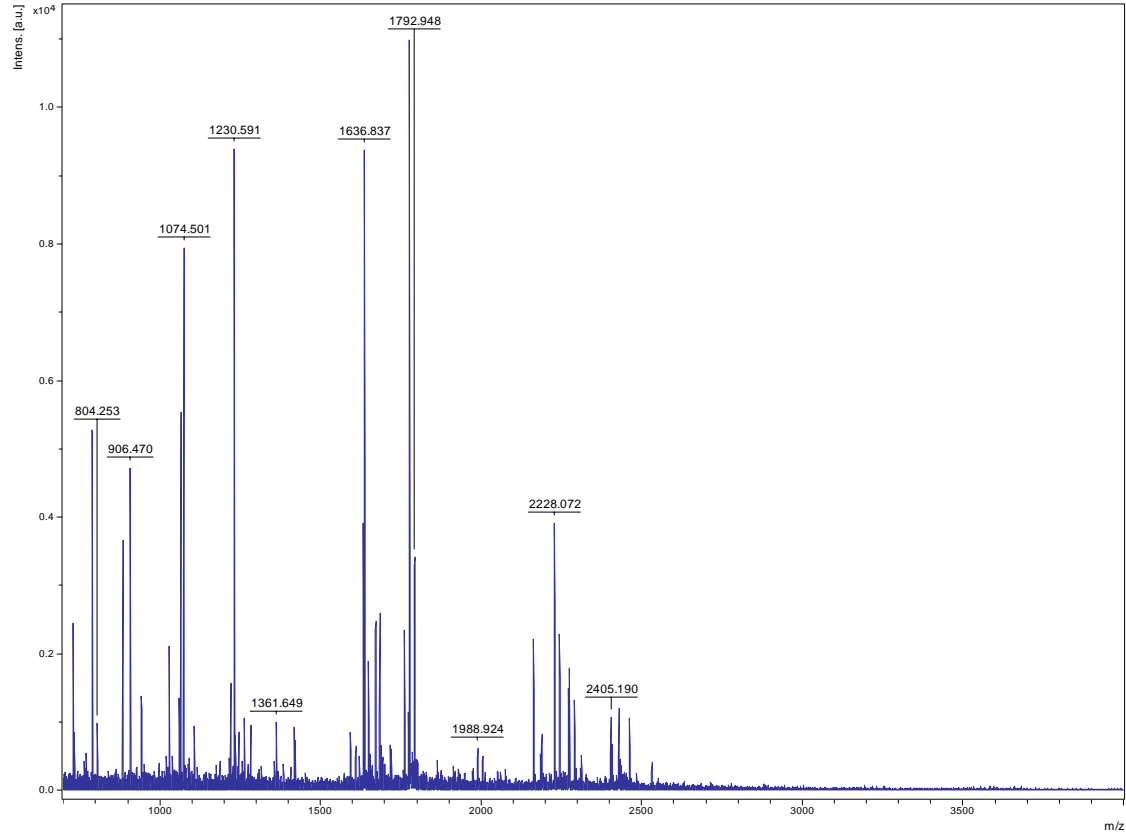

Match to: gi|50912399 Score: 124 Expect: 2.8e-08

### Matched peptides:

| Start - End | Observed  | Mr (expt) | Mr (calc) | Delta   | Miss Sequence                             |
|-------------|-----------|-----------|-----------|---------|-------------------------------------------|
| 104 - 114   | 1174.4371 | 1173.4298 | 1173.5261 | -0.0963 | 0 R.VAEGDAEDVNR.A                         |
| 121 - 130   | 1230.4641 | 1229.4568 | 1229.5941 | -0.1373 | 1 R.RAFDEGPWPR.M                          |
| 122 - 130   | 1074.3184 | 1073.3111 | 1073.4930 | -0.1819 | 0 R.AFDEGPWPR.M                           |
| 143 - 164   | 2429.1844 | 2428.1771 | 2428.1546 | 0.0225  | 0 R.FADLIEQHADEIAALETWDGGK.T              |
| 325 - 344   | 2228.0772 | 2227.0699 | 2227.0579 | 0.0120  | 0 K.SPFIVMDDADVDAQAVELAHR.A               |
| 345 - 359   | 1775.7239 | 1774.7166 | 1774.7337 | -0.0171 | 0 R.ALFFNQGCCAGSR.T 3 Carbamidomethyl (C) |
| 382 - 403   | 2403.2159 | 2402.2086 | 2402.1865 | 0.0221  | 1 R.VVGDPFRTGVEQGPQIDGEQFK.K              |
| 389 - 403   | 1632.7534 | 1631.7461 | 1631.7791 | -0.0329 | 0 R.TGVEQGPQIDGEQFK.K                     |
| 389 - 404   | 1760.8471 | 1759.8398 | 1759.8740 | -0.0342 | 1 R.TGVEQGPQIDGEQFK.I                     |
| 411 - 425   | 1361.5653 | 1360.5580 | 1360.6582 | -0.1002 | 0 K.SGVDSGATLVAGGDR.A                     |
| 430 - 446   | 1988.8822 | 1987.8749 | 1987.9237 | -0.0487 | 0 R.GFYIQPTVFADVEDEMK.I                   |
| 447 - 461   | 1671.8812 | 1670.8739 | 1670.9243 | -0.0503 | 0 K.IAQEEIFGPVQSILK.F                     |
| 462 - 470   | 1065.3614 | 1064.3541 | 1064.5502 | -0.1960 | 0 K.FSTVEEVVRR.R                          |
| 462 - 471   | 1221.5187 | 1220.5114 | 1220.6513 | -0.1399 | 1 K.FSTVEEVVRR.A                          |
| 471 - 487   | 1792.9086 | 1791.9013 | 1791.9379 | -0.0366 | 1 R.RANATPYGLAAGVFTQR.L                   |
| 472 - 487   | 1636.8066 | 1635.7993 | 1635.8368 | -0.0375 | 0 R.ANATPYGLAAGVFTQR.L                    |
| 500 - 521   | 2405.2238 | 2404.2165 | 2404.1738 | 0.0427  | 0 R.VGTVVVNTYDVFDAAVPFGGYK.M              |
| 542 - 553   | 1283.6251 | 1282.6178 | 1282.7285 | -0.1107 | 1 K.AVVTPIKDAAWL.-                        |

## Spot 1554

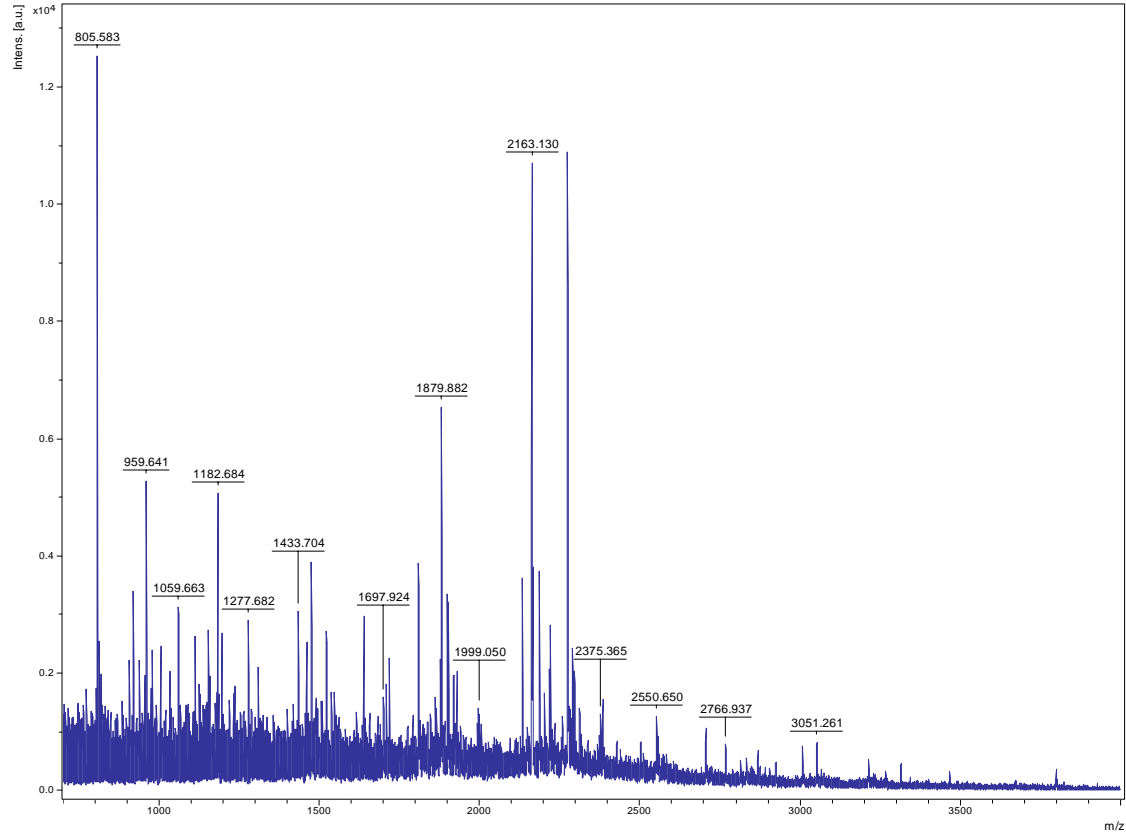

Match to: Q5WA72\_ORYSA Score: 99 Expect: 8.4e-06

### Matched peptides:

| Start - End | Observed  | Mr (expt) | Mr (calc) | Delta   | Miss Sequence              |                     |
|-------------|-----------|-----------|-----------|---------|----------------------------|---------------------|
| 66 - 79     | 1545.7335 | 1544.7262 | 1544.7616 | -0.0354 | 0 R.AQSMVLVLDNDNAR         |                     |
| 80 - 99     | 2375.3650 | 2374.3577 | 2374.1739 | 0.1838  | 1 R.RAVEENAEVLLLYAPWCER.S  | Carbamidomethyl (C) |
| 81 - 99     | 2219.1189 | 2218.1116 | 2218.0728 | 0.0389  | 0 R.AVEENAEVLLLYAPWCER.S   | Carbamidomethyl (C) |
| 100 - 106   | 802.6110  | 801.6037  | 801.4167  | 0.1871  | 0 R.SAQLMPR.F              |                     |
| 100 - 106   | 818.6188  | 817.6116  | 817.4116  | 0.2000  | 0 R.SAQLMPR.F              | Oxidation (M)       |
| 107 - 115   | 919.6151  | 918.6078  | 918.4923  | 0.1156  | 0 R.FAÉAAAAALR.A           |                     |
| 126 - 133   | 977.6146  | 976.6073  | 976.4978  | 0.1095  | 1 K.LDGERYPK.A             |                     |
| 164 - 171   | 959.6409  | 958.6337  | 958.5236  | 0.1101  | 0 K.DAIVTWVR.K             |                     |
| 185 - 192   | 938.5643  | 937.5570  | 937.4392  | 0.1178  | 0 K.DSAEEFLK.K             |                     |
| 194 - 203   | 1125.6254 | 1124.6181 | 1124.5866 | 0.0315  | 0 K.DQTFVGLFK.N            |                     |
| 204 - 215   | 1461.6598 | 1460.6525 | 1460.6459 | 0.0066  | 0 K.NFEGAEYEEFVK.A         |                     |
| 216 - 231   | 1809.8267 | 1808.8194 | 1808.8176 | 0.0018  | 0 K.AATSENEVQFVETNDR.N     |                     |
| 232 - 252   | 2273.3000 | 2272.2928 | 2272.2830 | 0.0098  | 1 R.NVAKILFPGIAEEQFLGLVK.S |                     |
| 406 - 414   | 954.5800  | 953.5727  | 953.5657  | 0.0070  | 1 K.GPIEKVVGR.T            |                     |
| 502 - 509   | 906.6449  | 905.6376  | 905.4640  | 0.1736  | 1 K.SNLKDMAR.F             |                     |
| 515 - 533   | 1999.0503 | 1998.0430 | 1998.0520 | -0.0090 | 1 K.LQIADVETVAAGDIVKDEL.-  |                     |

## Spot 1557

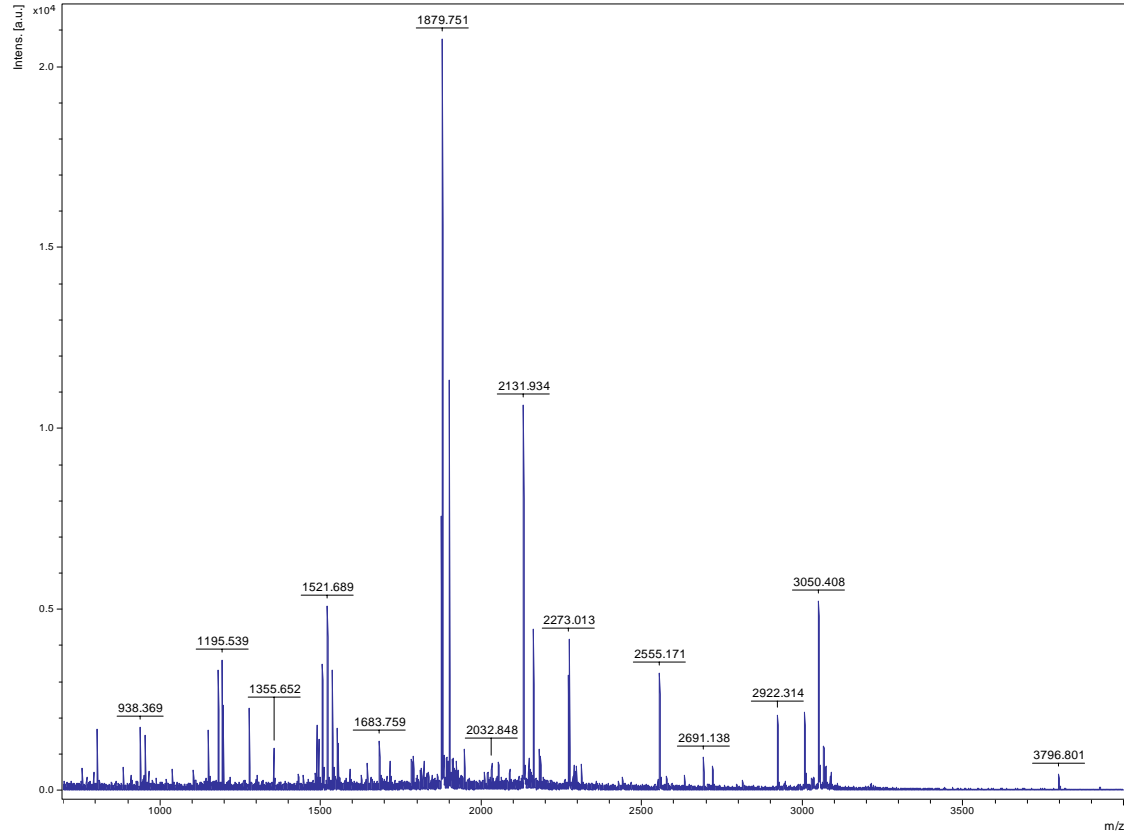

Match to: gi|62546209; Score: 285

### Matched peptides:

| Start - End | Observed | Mr (expt) | Mr (calc) | Delta | Miss Sequence                                |
|-------------|----------|-----------|-----------|-------|----------------------------------------------|
| 57 - 73     | 2180.83  | 2179.83   | 2179.94   | -0.11 | 0 HPFMVVEFYAPWCGHCK Oxidation (M)            |
| 57 - 74     | 2292.95  | 2291.95   | 2292.04   | -0.10 | 1 HPFMVVEFYAPWCGHCK                          |
| 105 - 121   | 1947.95  | 1946.95   | 1947.08   | -0.13 | 1 NKPLATKYEIQGFPTLK                          |
| 112 - 121   | 1195.54  | 1194.54   | 1194.63   | -0.09 | 0 YEIQGFPTLK                                 |
| 129 - 137   | 1104.47  | 1103.47   | 1103.57   | -0.10 | 1 NIQYKQPR                                   |
| 138 - 147   | 1150.50  | 1149.50   | 1149.59   | -0.09 | 0 EAEGIVEYLK                                 |
| 138 - 148   | 1278.59  | 1277.59   | 1277.69   | -0.10 | 1 EAEGIVEYLLK                                |
| 196 - 213   | 2148.91  | 2147.90   | 2148.06   | -0.16 | 1 LRSDYDFGHTLHANHLPR                         |
| 214 - 224   | 1182.58  | 1181.58   | 1181.65   | -0.08 | 0 GDAAVRPLVR                                 |
| 225 - 237   | 1536.71  | 1535.71   | 1535.82   | -0.11 | 0 LFKPFDELVVDSK                              |
| 225 - 246   | 2555.17  | 2554.17   | 2554.32   | -0.15 | 1 LFKPFDELVVDSKDFDVTALEK                     |
| 238 - 246   | 1037.45  | 1036.44   | 1036.51   | -0.06 | 0 DFDVTALEK                                  |
| 247 - 255   | 965.40   | 964.40    | 964.49    | -0.09 | 0 FIDASSTPK                                  |
| 256 - 271   | 1899.88  | 1898.87   | 1898.99   | -0.12 | 1 VVTFDKNPDNHPYLLK                           |
| 272 - 279   | 885.40   | 884.40    | 884.44    | -0.04 | 0 FFQSSAAK                                   |
| 296 - 308   | 1506.60  | 1505.59   | 1505.70   | -0.11 | 1 SVYYGAAEEFKDK                              |
| 312 - 330   | 2131.93  | 2130.93   | 2131.07   | -0.14 | 0 FLIGDIEASQGAFQYFGLR                        |
| 312 - 345   | 3796.80  | 3795.80   | 3795.94   | -0.14 | 1 FLIGDIEASQGAFQYFGLREDQVPLIIQDGESK          |
| 331 - 345   | 1683.76  | 1682.76   | 1682.87   | -0.12 | 0 EDQVPLIIQDGESK                             |
| 350 - 362   | 1521.69  | 1520.69   | 1520.80   | -0.11 | 0 AHVPEPDQIVSWLK                             |
| 375 - 400   | 2922.31  | 2921.31   | 2921.48   | -0.17 | 1 SEPIPEVNDPEPVKVVADNVHDFVFK                 |
| 388 - 400   | 1488.67  | 1487.67   | 1487.78   | -0.11 | 0 VVADNVHDFVFK                               |
| 404 - 418   | 1879.75  | 1878.75   | 1878.85   | -0.11 | 0 NVLVEFYAPWCGHCK                            |
| 420 - 432   | 1355.65  | 1354.65   | 1354.77   | -0.12 | 0 LAPILDEAATLK                               |
| 442 - 469   | 3065.28  | 3064.28   | 3064.40   | -0.12 | 0 MDATANDVPSEFDVQGYPTLYFVTPSGK Oxidation (M) |
| 470 - 477   | 938.37   | 937.37    | 937.43    | -0.07 | 0 MVPYESGR                                   |
| 470 - 477   | 954.37   | 953.37    | 953.43    | -0.06 | 0 MVPYESGR Oxidation (M)                     |

### Spot 1559

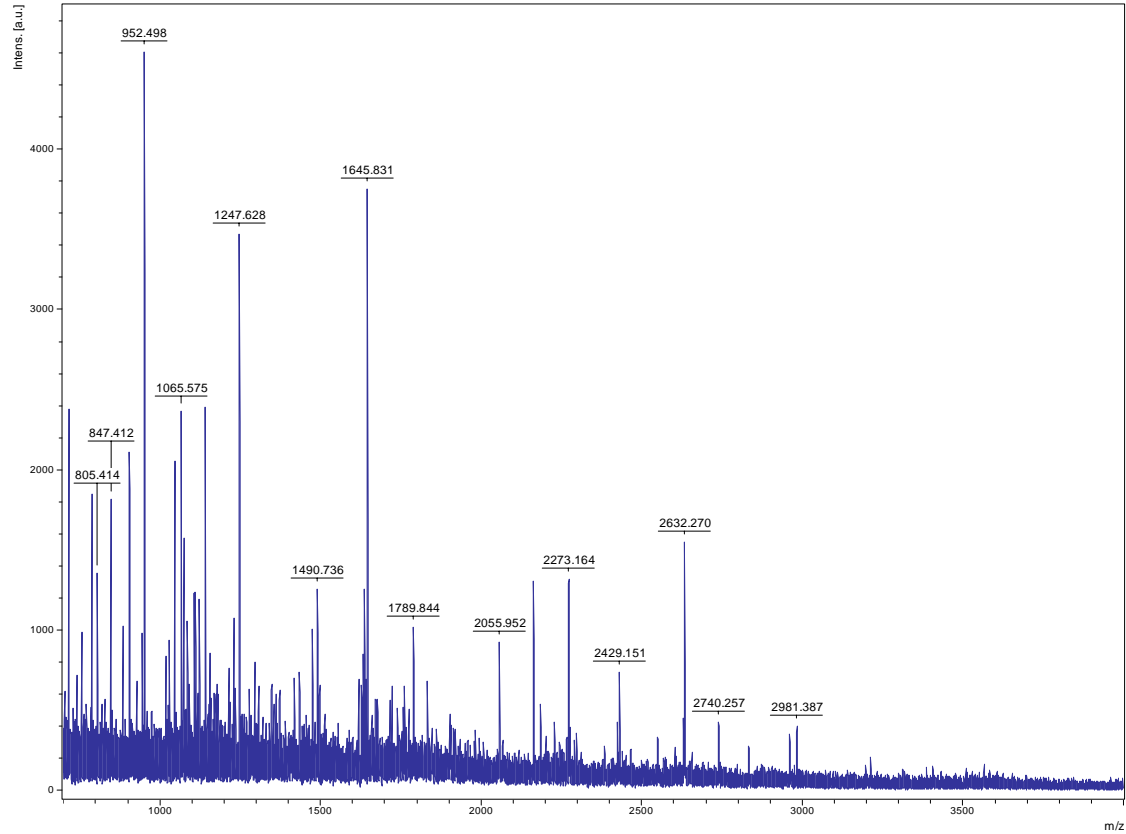

Match to: gi|55296000 Score: 120 Expect: 6.7e-08

#### Matched peptides:

| Start - End | Observed  | Mr (expt) | Mr (calc) | Delta   | Miss Sequence                                          |
|-------------|-----------|-----------|-----------|---------|--------------------------------------------------------|
| 15 - 23     | 847.3172  | 846.3099  | 846.3831  | -0.0732 | 0 R.AGEGAGTER.L                                        |
| 54 - 68     | 1789.8382 | 1788.8309 | 1788.8213 | 0.0096  | 1 R.CVFTSDADRDTPHLR.T Carbamidomethyl (C)              |
| 103 - 114   | 1247.6360 | 1246.6287 | 1246.6128 | 0.0159  | 0 R.ATPAVPVGGCYR.L Carbamidomethyl (C)                 |
| 224 - 242   | 2055.9745 | 2054.9672 | 2054.9327 | 0.0345  | 0 K.HVDDNADITISCAPIDGSR.A Carbamidomethyl (C)          |
| 313 - 326   | 1645.8597 | 1644.8524 | 1644.8260 | 0.0265  | 0 K.YAHLQDFGSEILPR.A                                   |
| 372 - 379   | 952.4464  | 951.4391  | 951.4814  | -0.0423 | 0 K.TPFFTSR.Y                                          |
| 380 - 388   | 1086.6065 | 1085.5992 | 1085.6233 | -0.0241 | 1 R.YLPPARLEK.C                                        |
| 391 - 417   | 2981.4385 | 2980.4312 | 2980.4270 | 0.0043  | 1 K.IKDAISDGGCSFECTIEHSVIGISSR.V 2 Carbamidomethyl (C) |
| 393 - 417   | 2740.2893 | 2739.2820 | 2739.2479 | 0.0341  | 0 K.DAISDGGCSFECTIEHSVIGISSR.V 2 Carbamidomethyl (C)   |
| 418 - 425   | 905.4147  | 904.4074  | 904.4688  | -0.0613 | 0 R.VSIGCELK.D Carbamidomethyl (C)                     |
| 450 - 459   | 1027.5461 | 1026.5388 | 1026.5709 | -0.0321 | 0 K.VPIGIGENTK.I                                       |
| 462 - 470   | 1106.5103 | 1105.5030 | 1105.5008 | 0.0022  | 0 R.NCIIDMNR.I Carbamidomethyl (C)                     |
| 462 - 470   | 1122.4855 | 1121.4782 | 1121.4957 | -0.0175 | 0 R.NCIIDMNR.I Carbamidomethyl (C); Oxidation (M)      |
| 474 - 496   | 2632.2884 | 2631.2811 | 2631.2564 | 0.0247  | 0 R.NVIIANTQGVQESDHPEEGYYIR.S                          |

## Spot 1565

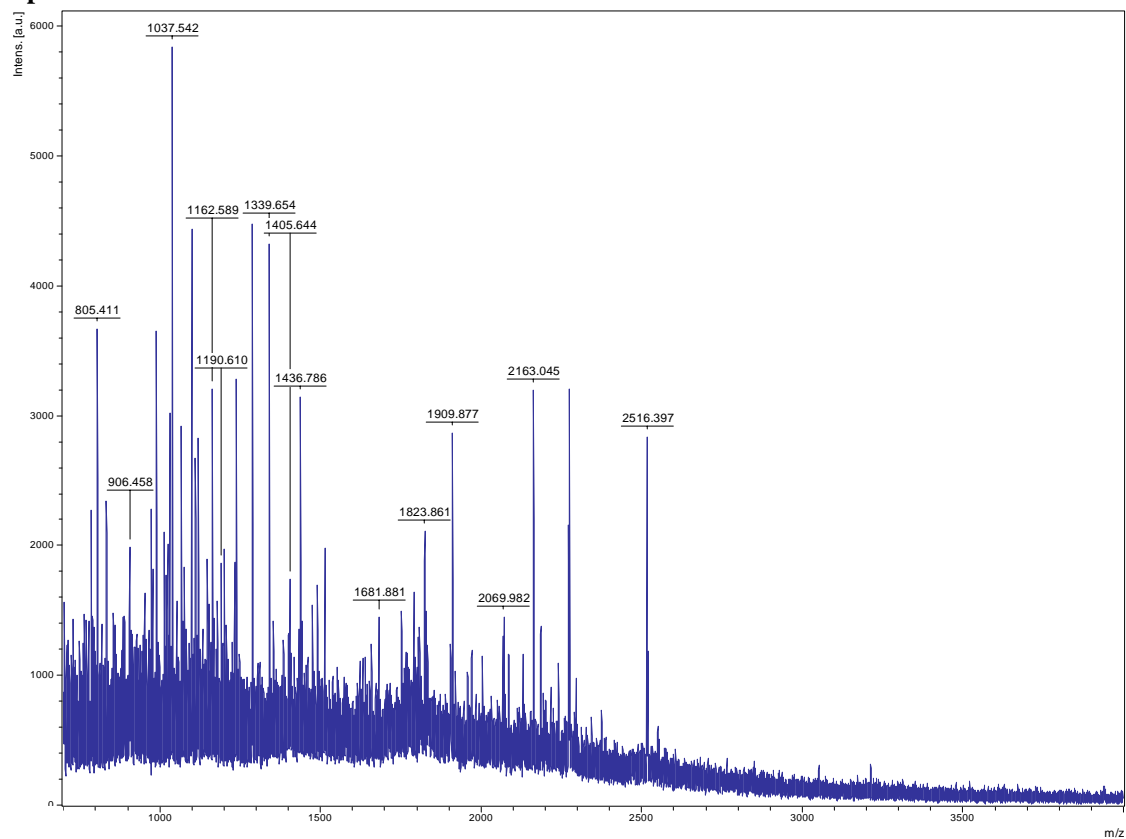

Match to: gi|34898202 Score: 86 Expect: 0.00016

### Matched peptides:

| Start - End | Observed  | Mr (expt) | Mr (calc) | Delta   | Miss Sequence                |                     |
|-------------|-----------|-----------|-----------|---------|------------------------------|---------------------|
| 1 - 19      | 1790.9509 | 1789.9436 | 1789.7835 | 0.1601  | 1 -.MGQGTGGMGKQGGAPGDR.K     | 2 Oxidation (M)     |
| 31 - 40     | 1099.6259 | 1098.6186 | 1098.5822 | 0.0365  | 1 R.KFEPPAAPSR.V             |                     |
| 32 - 40     | 1013.5191 | 1012.5118 | 1012.4978 | 0.0141  | 0 K.FEPPAAPSR.V              | Acetyl (N-term)     |
| 76 - 92     | 2070.0307 | 2069.0234 | 2069.0139 | 0.0096  | 1 R.VKDYLLMEEEFVAAQER.L      |                     |
| 76 - 92     | 2086.0727 | 2085.0654 | 2085.0088 | 0.0566  | 1 R.VKDYLLMEEEFVAAQER.L      | Oxidation (M)       |
| 207 - 228   | 2516.3467 | 2515.3394 | 2515.3322 | 0.0073  | 0 K.EAVELPLTHPELYEDIGIRPPK.G |                     |
| 229 - 240   | 1190.6831 | 1189.6758 | 1189.6342 | 0.0416  | 0 K.GVILYGEPTGK.T            |                     |
| 246 - 257   | 1237.7019 | 1236.6946 | 1236.6462 | 0.0484  | 0 K.AVANSTSATFLR.V           |                     |
| 258 - 266   | 972.5047  | 971.4974  | 971.5651  | -0.0677 | 0 R.VVGSELIQK.Y              |                     |
| 302 - 311   | 1147.6162 | 1146.6089 | 1146.5166 | 0.0923  | 1 K.RYDAHSGGER.E             |                     |
| 316 - 330   | 1751.8888 | 1750.8815 | 1750.8559 | 0.0256  | 0 R.TMLELLNQLDGFDSR.G        |                     |
| 342 - 354   | 1436.8701 | 1435.8628 | 1435.8147 | 0.0482  | 0 R.IESLDPALLRPGR.I          |                     |
| 358 - 367   | 1199.7420 | 1198.7347 | 1198.6961 | 0.0386  | 1 R.KIEFPLPDIK.T             |                     |
| 405 - 416   | 1287.7603 | 1286.7530 | 1286.7016 | 0.0514  | 0 K.AICTEAGLLALR.E           | Carbamidomethyl (C) |



## Spot 1566

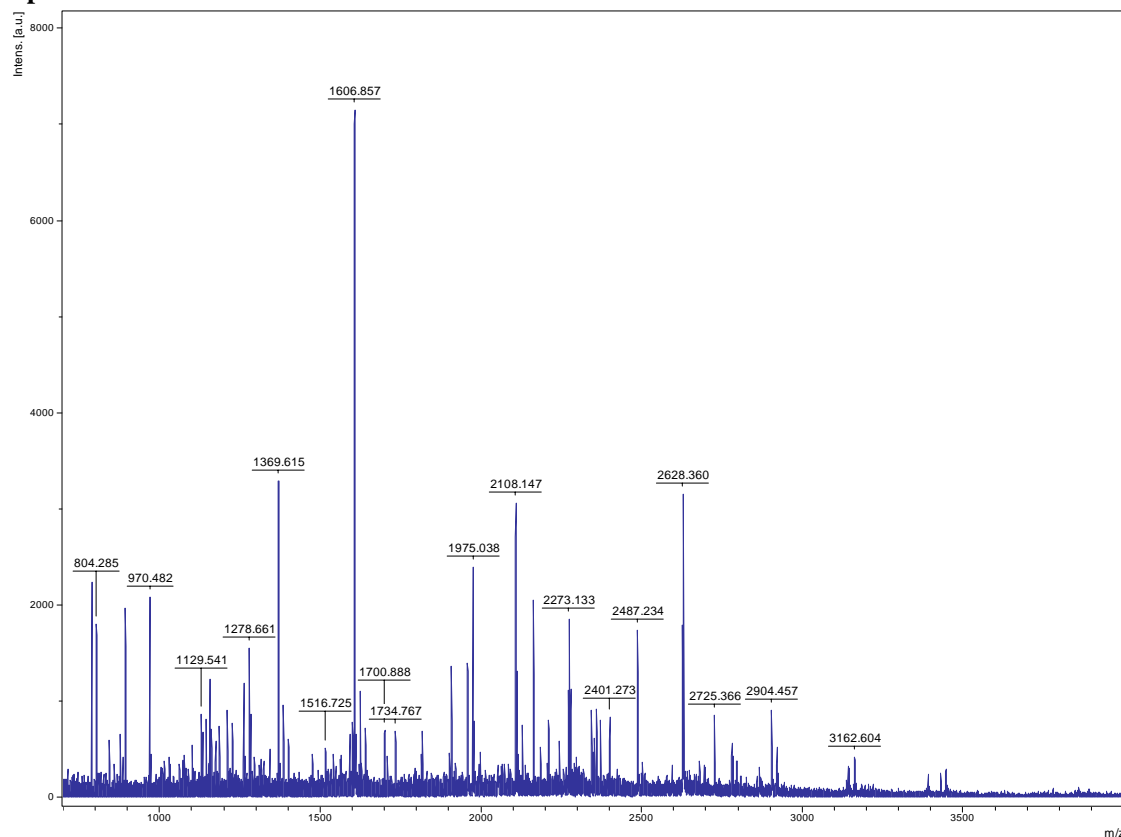

Match to: gi|62900380; Score: 181

### Matched peptides:

| Start - End | Observed | Mr (expt) | Mr (calc) | Delta | Miss Sequence                               |
|-------------|----------|-----------|-----------|-------|---------------------------------------------|
| 2 - 8       | 844.48   | 843.48    | 843.46    | 0.02  | 0 SLRPSER                                   |
| 29 - 37     | 1161.66  | 1160.65   | 1160.56   | 0.09  | 1 REDNMVEIR                                 |
| 51 - 76     | 2401.27  | 2400.27   | 2400.28   | -0.01 | 0 DGLPAAAAAASPLLAHSSALQK                    |
| 77 - 103    | 2904.46  | 2903.45   | 2903.43   | 0.02  | 0 LEGLPAMVQAVQSDDSAVQLEATTQFR               |
| 77 - 103    | 2920.40  | 2919.40   | 2919.43   | -0.03 | 0 LEGLPAMVQAVQSDDSAVQLEATTQFR Oxidation (M) |
| 111 - 125   | 1606.86  | 1605.85   | 1605.87   | -0.02 | 0 SPPIEEVINTGVVPR                           |
| 126 - 132   | 894.54   | 893.54    | 893.51    | 0.02  | 0 FIAFLQR                                   |
| 159 - 171   | 1343.77  | 1342.77   | 1342.79   | -0.02 | 0 VVVEGAVPIFVK                              |
| 172 - 181   | 1102.57  | 1101.57   | 1101.57   | 0.01  | 0 LLSSPSEDVVR                               |
| 172 - 197   | 2725.37  | 2724.36   | 2724.37   | -0.01 | 1 LLSSPSEDVREQAVWALGNVAGDSPK                |
| 182 - 197   | 1641.79  | 1640.79   | 1640.82   | -0.03 | 0 EQAVWALGNVAGDSPK                          |
| 200 - 220   | 2279.20  | 2278.20   | 2278.23   | -0.03 | 0 DLVLASGGLYPLLQQLNEHAK                     |
| 226 - 236   | 1369.62  | 1368.61   | 1368.62   | -0.01 | 0 NATWTLSNFCR                               |
| 237 - 255   | 2108.15  | 2107.14   | 2107.15   | -0.01 | 0 GKQPQNFQVQKALSALQR                        |
| 295 - 312   | 1959.13  | 1958.13   | 1958.14   | -0.01 | 0 LVLLMHPSASVLIPALR                         |
| 295 - 312   | 1975.04  | 1974.04   | 1974.13   | -0.10 | 0 LVLLMHPSASVLIPALR Oxidation (M)           |
| 352 - 365   | 1592.73  | 1591.73   | 1591.74   | -0.01 | 0 EACWTISNITAGNR                            |
| 394 - 412   | 1957.01  | 1956.01   | 1955.93   | 0.08  | 0 EAAWAISNATSGGTHDQIK                       |
| 413 - 433   | 2487.23  | 2486.23   | 2486.25   | -0.02 | 0 YLVAQCCKPLCDLLVCPDPR                      |
| 434 - 447   | 1600.88  | 1599.87   | 1599.89   | -0.02 | 0 IVTVCLELENILK                             |

Match to: gi|2443405; Score: 128

### Matched peptides:

| Start - End | Observed | Mr (expt) | Mr (calc) | Delta | Miss Sequence                        |
|-------------|----------|-----------|-----------|-------|--------------------------------------|
| 23 - 31     | 844.48   | 843.48    | 843.43    | 0.05  | 1 DGAAAAGR                           |
| 32 - 39     | 886.47   | 885.46    | 885.51    | -0.05 | 1 SVVAQRAR                           |
| 203 - 210   | 1077.58  | 1076.57   | 1076.50   | 0.07  | 1 FAYDSYRR                           |
| 392 - 404   | 1641.79  | 1640.79   | 1640.72   | 0.07  | 0 EMMDIEFTVQENR                      |
| 465 - 496   | 3162.60  | 3161.60   | 3161.61   | -0.01 | 0 VIATGLPASPAAVQIVFTAEDAEAWHAQK      |
| 503 - 523   | 2112.02  | 2111.02   | 2111.03   | -0.02 | 0 TETSPEDVGGMHAAVGILTR               |
| 503 - 523   | 2128.04  | 2127.03   | 2127.03   | 0.01  | 0 TETSPEDVGGMHAAVGILTR Oxidation (M) |
| 524 - 539   | 1600.88  | 1599.87   | 1599.79   | 0.08  | 1 GGMTSHAAVVARGWGK Oxidation (M)     |
| 636 - 646   | 1369.62  | 1368.61   | 1368.58   | 0.04  | 0 TEHMFFASDER                        |
| 636 - 646   | 1385.58  | 1384.58   | 1384.57   | 0.01  | 0 TEHMFFASDER Oxidation (M)          |
| 652 - 662   | 1278.66  | 1277.66   | 1277.65   | 0.01  | 0 QMIMASSLELR                        |
| 675 - 682   | 970.48   | 969.48    | 969.46    | 0.02  | 0 SDFEGIFR                           |
| 693 - 712   | 2343.16  | 2342.16   | 2342.17   | -0.02 | 0 LLDPPLEHFLPEGHVEDMVR               |
| 693 - 712   | 2359.16  | 2358.16   | 2358.17   | -0.01 | 0 LLDPPLEHFLPEGHVEDMVR Oxidation (M) |
| 713 - 728   | 1734.77  | 1733.76   | 1733.79   | -0.02 | 0 ELCSETGAAQDDVLR                    |
| 732 - 742   | 1262.65  | 1261.65   | 1261.65   | 0.00  | 0 LSEVNPMLGFR                        |
| 746 - 759   | 1623.79  | 1622.79   | 1622.80   | -0.01 | 0 LGISYPELTEMQAR Oxidation (M)       |
| 816 - 824   | 1015.56  | 1014.56   | 1014.55   | 0.00  | 0 VGTMIPIR                           |
| 856 - 882   | 3142.62  | 3141.62   | 3141.61   | 0.01  | 1 DDVGKFLPIYLSQGLQHPFVLDQR           |
| 861 - 882   | 2628.36  | 2627.36   | 2627.37   | -0.02 | 0 FLPIYLSQGLQHPFVLDQR                |
| 904 - 922   | 1975.04  | 1974.04   | 1973.97   | 0.07  | 0 VGICGEGGPELSVAFFAK                 |
| 923 - 934   | 1371.64  | 1370.63   | 1370.63   | 0.00  | 0 AGLDYVSCSPFR                       |
| 923 - 939   | 1907.97  | 1906.97   | 1906.97   | -0.00 | 1 AGLDYVSCSPFRVPIAR                  |

Match to: gi|50900276; Score: 92

### Matched peptides:

| Start - End | Observed | Mr (expt) | Mr (calc) | Delta | Miss Sequence |
|-------------|----------|-----------|-----------|-------|---------------|
| 97 - 106    | 1134.64  | 1133.63   | 1133.61   | 0.03  | 0 ELGLFVDVSR  |

|           |         |         |         |       |   |                            |
|-----------|---------|---------|---------|-------|---|----------------------------|
| 107 - 115 | 1129.54 | 1128.54 | 1128.53 | 0.01  | 0 | MGFTEEFRL                  |
| 107 - 115 | 1145.52 | 1144.52 | 1144.52 | -0.01 | 0 | MGFTEEFRL Oxidation (M)    |
| 144 - 151 | 1077.58 | 1076.57 | 1076.52 | 0.05  | 0 | MVGHYWLR Oxidation (M)     |
| 152 - 162 | 1186.62 | 1185.62 | 1185.61 | 0.00  | 0 | DPGLAPNSFLR                |
| 285 - 301 | 1815.89 | 1814.88 | 1814.91 | -0.03 | 0 | QGVAVTQENSLDNTAR           |
| 302 - 308 | 844.48  | 843.48  | 843.46  | 0.02  | 0 | IEGWLAR                    |
| 309 - 318 | 1211.56 | 1210.56 | 1210.56 | -0.00 | 0 | FPMFDWVGGR                 |
| 309 - 318 | 1227.55 | 1226.55 | 1226.55 | -0.01 | 0 | FPMFDWVGGR Oxidation (M)   |
| 353 - 378 | 2904.46 | 2903.45 | 2903.46 | -0.01 | 1 | NTVVKENPAALLALCWYWASEGIGNK |
| 426 - 438 | 1516.72 | 1515.72 | 1515.74 | -0.02 | 0 | GSTDQHA YIQQLR             |
| 482 - 502 | 2351.19 | 2350.19 | 2350.18 | 0.02  | 1 | SALYSNDRESISVTVQEVTPR      |
| 503 - 513 | 1161.66 | 1160.65 | 1160.66 | -0.00 | 0 | AVGALVALYER                |
| 514 - 536 | 2371.20 | 2370.20 | 2370.23 | -0.03 | 0 | AVGIYASLVNINAYHQPGVEAGK    |
| 549 - 573 | 2782.40 | 2781.40 | 2781.42 | -0.03 | 1 | VLTVLNEASCKDPAEPLTLDQIAER  |

### Spot 1571

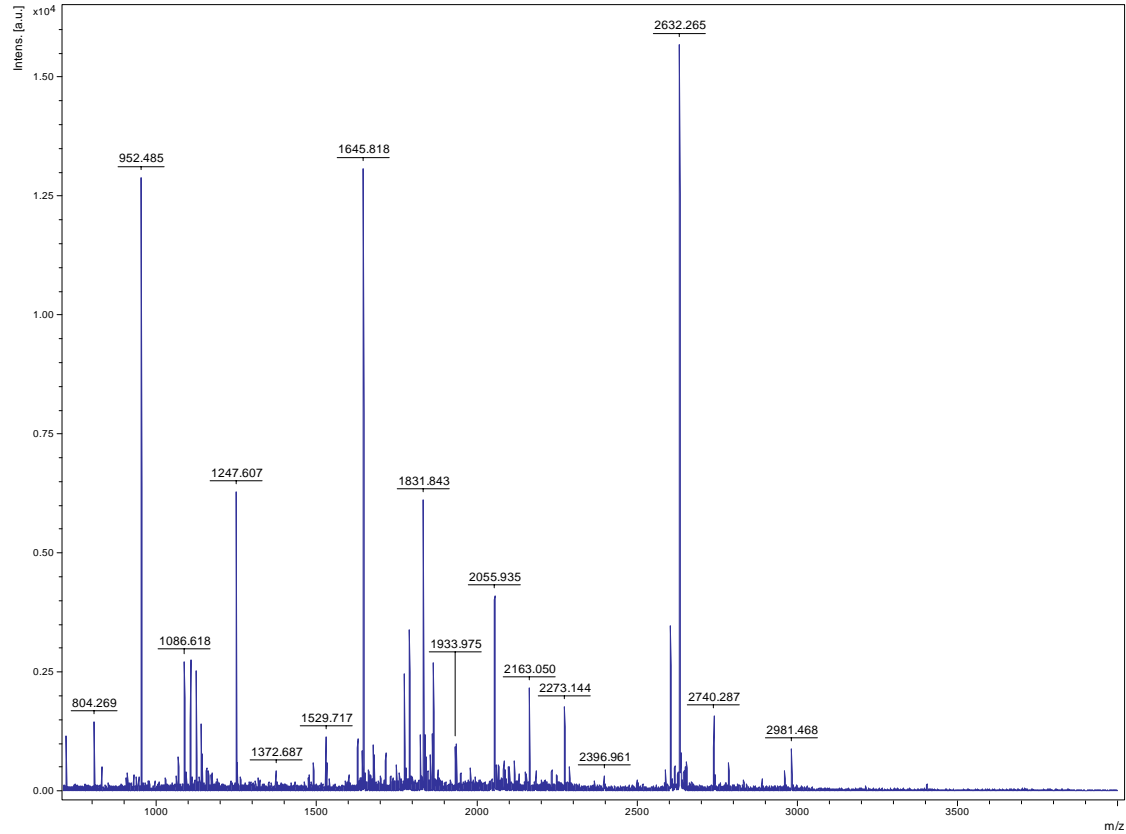

Match to: gi|34912986 Score: 100 Expect: 7.1e-06

### Matched peptides:

| Start - End | Observed  | Mr (expt) | Mr (calc) | Delta   | Miss Sequence                                              |
|-------------|-----------|-----------|-----------|---------|------------------------------------------------------------|
| 1 - 17      | 2083.8789 | 2082.8716 | 2082.8817 | -0.0101 | 0 -MQFMPLDTNACAQPMR.R Acetyl (N-term); Carbamidomethyl (C) |
| 2 - 17      | 1853.8463 | 1852.8390 | 1852.8092 | 0.0298  | 0 M.QFMPLDTNACAQPMR.R                                      |
| 28 - 41     | 1661.7774 | 1660.7701 | 1660.8276 | -0.0575 | 1 R.LMERLNIGGMTQEK.A Acetyl (N-term)                       |
| 32 - 41     | 1090.7003 | 1089.6930 | 1089.5488 | 0.1442  | 0 R.LNIGGMTQEK.A                                           |
| 58 - 72     | 1789.8032 | 1788.7959 | 1788.8213 | -0.0254 | 1 R.CVFTSDADRDTPHLR.T Carbamidomethyl (C)                  |
| 58 - 72     | 1831.8273 | 1830.8200 | 1830.8319 | -0.0119 | 1 R.CVFTSDADRDTPHLR.T Acetyl (N-term); Carbamidomethyl (C) |
| 107 - 118   | 1247.7274 | 1246.7201 | 1246.6128 | 0.1073  | 0 R.ATPVPVGGCYR.L Carbamidomethyl (C)                      |
| 119 - 134   | 1822.8548 | 1821.8475 | 1821.8753 | -0.0278 | 0 R.LIDIPMSNCFNSGINK.I Carbamidomethyl (C)                 |
| 135 - 148   | 1627.8118 | 1626.8045 | 1626.8188 | -0.0142 | 0 K.IFVMTQFNSASLNR.H                                       |
| 219 - 227   | 1155.6748 | 1154.6675 | 1154.5464 | 0.1212  | 0 R.MNYMELVQK.H                                            |
| 228 - 246   | 1998.9453 | 1997.9380 | 1997.9112 | 0.0268  | 0 K.HVDDNADITISCAPIDGSR.A                                  |
| 228 - 246   | 2055.9108 | 2054.9035 | 2054.9327 | -0.0292 | 0 K.HVDDNADITISCAPIDGSR.A Carbamidomethyl (C)              |
| 247 - 260   | 1529.7521 | 1528.7448 | 1528.7157 | 0.0291  | 1 R.ASDYGLVKFDDSGR.V                                       |
| 261 - 277   | 1933.9473 | 1932.9400 | 1932.9866 | -0.0466 | 0 R.VIQFLEKPEGADLESMSK.V                                   |
| 317 - 330   | 1645.8308 | 1644.8235 | 1644.8260 | -0.0024 | 0 K.YAHLQDFGSEILPR.A                                       |
| 354 - 368   | 1677.8195 | 1676.8122 | 1676.8409 | -0.0287 | 0 K.SFFDANLALTEQPPK.F                                      |
| 354 - 375   | 2604.4211 | 2603.4138 | 2603.2583 | 0.1555  | 1 K.SFFDANLALTEQPPKFEFYDPK.T                               |
| 354 - 375   | 2646.4395 | 2645.4322 | 2645.2689 | 0.1633  | 1 K.SFFDANLALTEQPPKFEFYDPK.T Acetyl (N-term)               |
| 376 - 383   | 952.6650  | 951.6577  | 951.4814  | 0.1763  | 0 K.TPFFTSR.Y                                              |
| 384 - 392   | 1086.7625 | 1085.7552 | 1085.6233 | 0.1319  | 1 R.YLPPARLEK.C                                            |
| 448 - 463   | 1714.9515 | 1713.9442 | 1713.9664 | -0.0222 | 1 K.LLFEKVPVIGIGENTK.I                                     |
| 466 - 474   | 1106.6793 | 1105.6720 | 1105.5008 | 0.1712  | 0 R.NCIIDMNR.I Carbamidomethyl (C)                         |
| 478 - 500   | 2632.4234 | 2631.4161 | 2631.2564 | 0.1597  | 0 R.NVIANTQGVQESDHPEEGYIR.S                                |

### Spot 1573

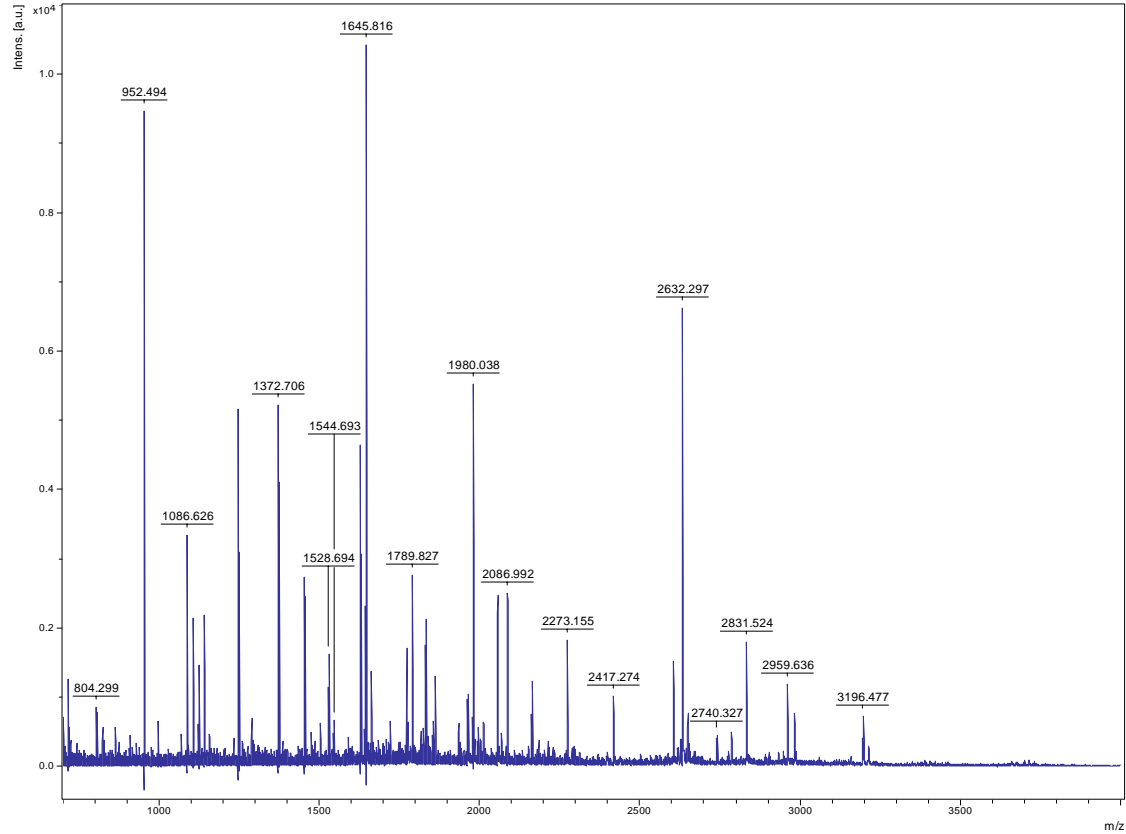

Match to: gi|13540812 Score: 109 Expect: 8.9e-07

#### Matched peptides:

| Start - End | Observed  | Mr (expt) | Mr (calc) | Delta   | Miss Sequence                       |                                    |
|-------------|-----------|-----------|-----------|---------|-------------------------------------|------------------------------------|
| 1 - 17      | 2001.9952 | 2000.9879 | 2000.8286 | 0.1593  | 0 -.MEFMPLDTNACAQPMR.R              | Oxidation (M)                      |
| 2 - 18      | 2067.9705 | 2066.9632 | 2066.9158 | 0.0474  | 1 M.EFMPLDTNACAQPMRR.A              | Carbamidomethyl (C)                |
| 28 - 41     | 1661.7842 | 1660.7769 | 1660.8276 | -0.0507 | 1 R.LMERLNIGGMTQEK.A                | Acetyl (N-term)                    |
| 58 - 72     | 1789.8381 | 1788.8308 | 1788.8213 | 0.0095  | 1 R.CVFTSDADRDTPHLR.T               | Carbamidomethyl (C)                |
| 78 - 106    | 2959.6211 | 2958.6138 | 2958.5562 | 0.0576  | 1 R.KNYADASHVSAVILGGGTGVQLFPLTSTR.A |                                    |
| 79 - 106    | 2831.5496 | 2830.5423 | 2830.4613 | 0.0811  | 0 K.NYADASHVSAVILGGGTGVQLFPLTSTR.A  |                                    |
| 107 - 118   | 1247.5629 | 1246.5556 | 1246.6128 | -0.0572 | 0 R.ATPAVPVGGCYR.L                  | Carbamidomethyl (C)                |
| 119 - 134   | 1838.9340 | 1837.9267 | 1837.8702 | 0.0565  | 0 R.LIDIPMSNCFNSGINK.I              | Carbamidomethyl (C); Oxidation (M) |
| 135 - 148   | 1627.8096 | 1626.8023 | 1626.8188 | -0.0164 | 0 K.IFVMTQFNASLNR.H                 |                                    |
| 135 - 148   | 1643.8033 | 1642.7960 | 1642.8137 | -0.0177 | 0 K.IFVMTQFNASLNR.H                 | Oxidation (M)                      |
| 228 - 246   | 2055.9475 | 2054.9402 | 2054.9327 | 0.0075  | 0 K.HVDDNADITISCAPIDGSR.A           | Carbamidomethyl (C)                |
| 315 - 330   | 1860.9438 | 1859.9365 | 1859.9529 | -0.0164 | 1 K.SKYAHLQDFGSEILPR.A              |                                    |
| 317 - 330   | 1645.8105 | 1644.8032 | 1644.8260 | -0.0227 | 0 K.YAHLQDFGSEILPR.A                |                                    |
| 339 - 353   | 1831.8648 | 1830.8575 | 1830.8498 | 0.0077  | 0 K.ACVFTEYWEDIGTIK.S               | Carbamidomethyl (C)                |
| 354 - 375   | 2604.2845 | 2603.2772 | 2603.2583 | 0.0189  | 1 K.SFFDANLALTEQPPKFEFYDPK.T        |                                    |
| 376 - 383   | 952.3478  | 951.3405  | 951.4814  | -0.1409 | 0 K.TPFFTSR.Y                       |                                    |
| 384 - 392   | 1086.5316 | 1085.5243 | 1085.6233 | -0.0990 | 1 R.YLPPARLEK.C                     |                                    |
| 395 - 421   | 2981.4792 | 2980.4719 | 2980.4270 | 0.0450  | 1 K.IKDAISDGCFSFECTIEHSGVIGSSR.V    | 2 Carbamidomethyl (C)              |
| 397 - 421   | 2740.3095 | 2739.3022 | 2739.2479 | 0.0543  | 0 K.DAISDGCFSFECTIEHSGVIGSSR.V      | 2 Carbamidomethyl (C)              |
| 466 - 474   | 1106.4372 | 1105.4299 | 1105.5008 | -0.0709 | 0 R.NCIIDMNR.I                      | Carbamidomethyl (C)                |
| 478 - 500   | 2632.3022 | 2631.2949 | 2631.2564 | 0.0385  | 0 R.NVIIANTQGVQSDHPEEGYYIR.S        |                                    |

Spot 1576

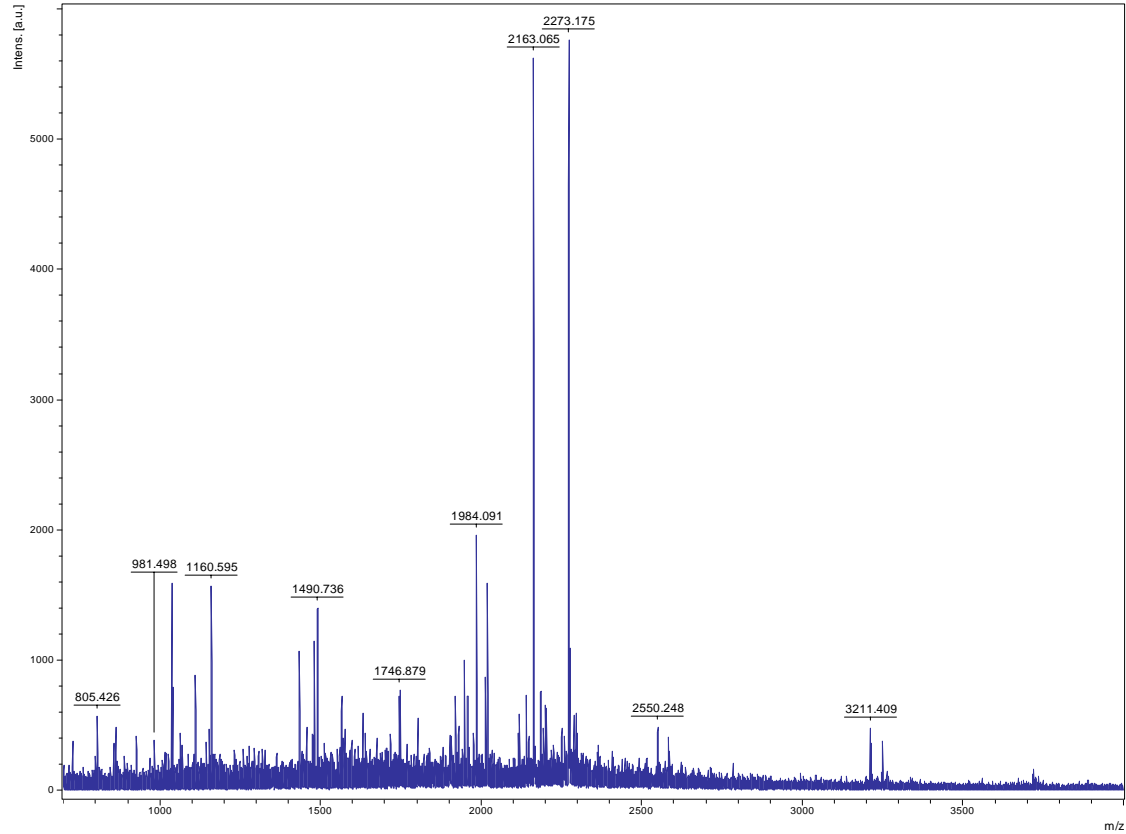

Match to: gi|50919601 Score: 74 Expect: 0.0029

Matched peptides:

| Start - End | Observed  | Mr (expt) | Mr (calc) | Delta   | Miss Sequence                                   |
|-------------|-----------|-----------|-----------|---------|-------------------------------------------------|
| 33 - 40     | 1039.4207 | 1038.4134 | 1038.4043 | 0.0091  | 0 K.FDDGWEDR.W                                  |
| 63 - 79     | 2018.8977 | 2017.8904 | 2017.8653 | 0.0251  | 1 K.WYGDADDKGIQTSEDYR.F                         |
| 105 - 117   | 1433.7167 | 1432.7094 | 1432.6768 | 0.0326  | 1 K.HEQKLDCCGGYVK.L                             |
| 105 - 117   | 1490.7361 | 1489.7288 | 1489.6983 | 0.0305  | 1 K.HEQKLDCCGGYVK.L Carbamidomethyl (C)         |
| 166 - 187   | 2583.3513 | 2582.3440 | 2582.3526 | -0.0086 | 1 K.DVPCKTDQLTHVYTLIIRPDAKY Carbamidomethyl (C) |
| 171 - 187   | 1984.0909 | 1983.0837 | 1983.0789 | 0.0048  | 0 K.TDQLTHVYTLIIRPDAKY                          |
| 198 - 212   | 1746.8789 | 1745.8716 | 1745.8624 | 0.0092  | 0 K.QTGSYDDWNIIPK.N                             |
| 221 - 247   | 3247.4163 | 3246.4090 | 3246.4516 | -0.0427 | 1 K.KPEDWDDNEYIPDPEDKKPEGYDDIPK.E               |
| 330 - 347   | 2011.9586 | 2010.9513 | 2010.9786 | -0.0272 | 0 K.SGTLFDNIIITDDPEYAK.K                        |
| 349 - 356   | 981.4978  | 980.4905  | 980.4603  | 0.0302  | 0 K.FAEETWAK.H                                  |

### Spot 1577

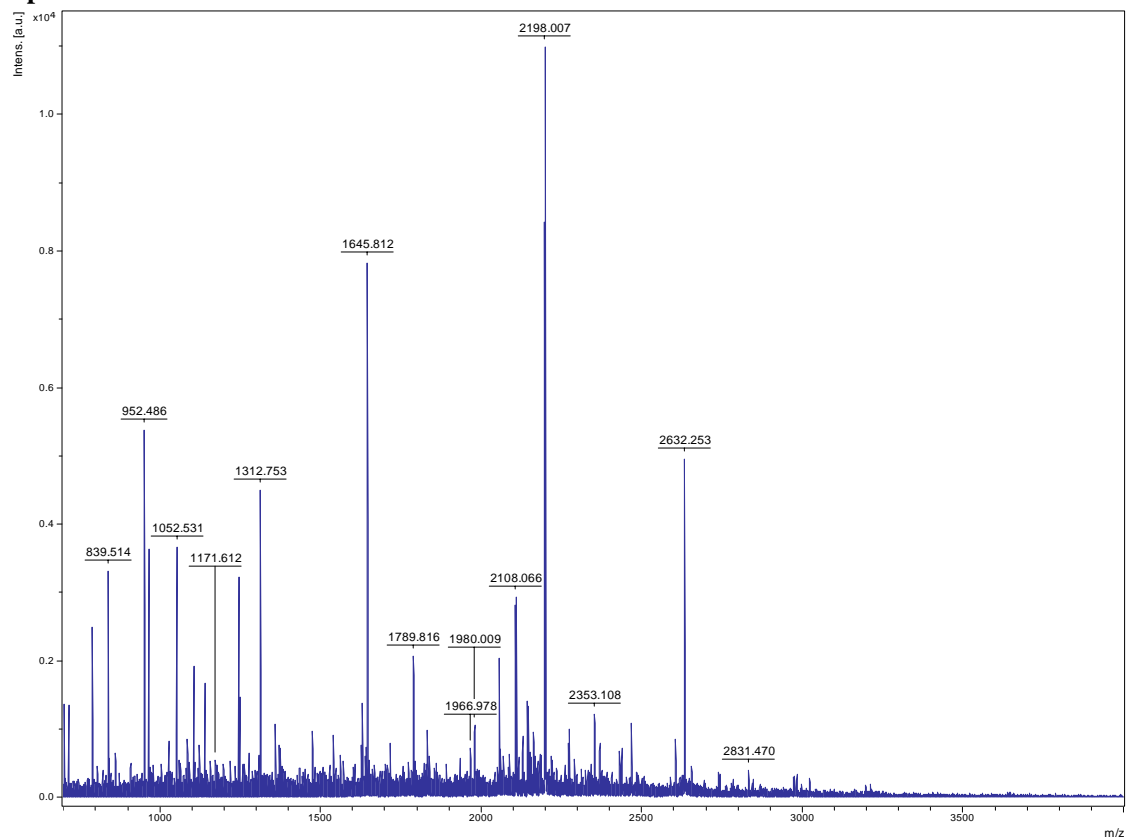

Match to: gi|15823775; Score: 195

#### Matched peptides:

| Start - End | Observed | Mr (expt) | Mr (calc) | Delta | Miss Sequence                                     |
|-------------|----------|-----------|-----------|-------|---------------------------------------------------|
| 14 - 27     | 1561.74  | 1560.74   | 1560.76   | -0.02 | 1 AATDKLDQISENEK                                  |
| 28 - 36     | 965.54   | 964.54    | 964.53    | 0.01  | 0 SGFISLVS                                        |
| 50 - 76     | 2973.48  | 2972.48   | 2972.49   | -0.01 | 1 IQPTDEVVVPYDTLSAAPEDLNK                         |
| 86 - 106    | 2163.04  | 2162.03   | 2162.08   | -0.05 | 1 LNGGLGTTMGCTGPKSVIEV <sup>R</sup> Oxidation (M) |
| 126 - 146   | 2467.11  | 2466.11   | 2466.13   | -0.02 | 0 YGCNVPLLLMNSFNTHDDTQK                           |
| 151 - 168   | 2198.01  | 2197.01   | 2197.02   | -0.01 | 0 YSNSNIEIHTFNQSQYPR                              |
| 169 - 180   | 1358.73  | 1357.73   | 1357.75   | -0.02 | 0 IVTEDFLPLPSK                                    |
| 183 - 205   | 2430.13  | 2429.13   | 2429.14   | -0.01 | 1 TGKDGWYPPGHGDFPSSLNNSGK                         |
| 186 - 205   | 2143.96  | 2142.96   | 2142.98   | -0.02 | 0 DGWYPPGHGDFPSSLNNSGK                            |
| 215 - 232   | 1966.98  | 1965.98   | 1966.00   | -0.03 | 0 EYVVFVANSNDLGAIVDIK                             |
| 233 - 251   | 2353.11  | 2352.11   | 2352.14   | -0.03 | 0 ILNHLIHNQNEYCMEVTPK                             |
| 233 - 251   | 2369.11  | 2368.11   | 2368.13   | -0.02 | 0 ILNHLIHNQNEYCMEVTPK <sup>R</sup> Oxidation (M)  |
| 258 - 267   | 1052.53  | 1051.53   | 1051.53   | -0.00 | 0 GGTLISYEGR                                      |
| 268 - 285   | 2108.07  | 2107.06   | 2107.09   | -0.03 | 0 VQLLEIAQVPDEHVNFEK                              |
| 307 - 315   | 1028.58  | 1027.58   | 1027.60   | -0.03 | 1 RLVEAEALK                                       |
| 330 - 342   | 1312.75  | 1311.75   | 1311.75   | -0.00 | 0 VLQLETAAGAAIR                                   |
| 347 - 354   | 839.51   | 838.51    | 838.50    | 0.01  | 0 AIGINVPR                                        |
| 362 - 383   | 2438.28  | 2437.27   | 2437.31   | -0.04 | 0 ATSDLLLVQSDLYTLVDGFVIR                          |
| 388 - 402   | 1629.79  | 1628.79   | 1628.80   | -0.02 | 0 TNPSNPSIELGPEFK                                 |

Match to: gi|55296000; Score: 155

#### Matched peptides:

| Start - End | Observed | Mr (expt) | Mr (calc) | Delta | Miss Sequence                                  |
|-------------|----------|-----------|-----------|-------|------------------------------------------------|
| 54 - 68     | 1789.82  | 1788.81   | 1788.82   | -0.01 | 1 CVFTSDADRDPHLR                               |
| 75 - 102    | 2831.47  | 2830.47   | 2830.46   | 0.01  | 0 NYADASHVSAVILGGGTGVQLFPLTSTR                 |
| 103 - 114   | 1247.62  | 1246.61   | 1246.61   | 0.00  | 0 ATPAVPVGGCYR                                 |
| 131 - 144   | 1627.80  | 1626.79   | 1626.82   | -0.03 | 0 IFVMTQFNSASLNR                               |
| 131 - 144   | 1643.80  | 1642.80   | 1642.81   | -0.02 | 0 IFVMTQFNSASLNR <sup>R</sup> Oxidation (M)    |
| 215 - 223   | 1171.61  | 1170.61   | 1170.54   | 0.07  | 0 MNYMELVQK <sup>R</sup> Oxidation (M)         |
| 224 - 242   | 2055.93  | 2054.93   | 2054.93   | -0.00 | 0 HVDDNADITISCAPIDGSR                          |
| 257 - 273   | 1933.96  | 1932.95   | 1932.99   | -0.03 | 0 VIQFLEKPEGADLES <sup>M</sup> K               |
| 313 - 326   | 1645.81  | 1644.81   | 1644.83   | -0.02 | 0 YAHLQDFGSEILPR                               |
| 327 - 334   | 909.52   | 908.52    | 908.51    | 0.01  | 0 AVLEHN <sup>V</sup> K                        |
| 335 - 349   | 1831.83  | 1830.83   | 1830.85   | -0.02 | 0 ACVFTEYWEDIGTIK                              |
| 350 - 371   | 2604.26  | 2603.26   | 2603.26   | 0.00  | 1 SFFDANLALTEQPPKFEFYDPK                       |
| 372 - 379   | 952.49   | 951.48    | 951.48    | 0.00  | 0 TPFFTS <sup>R</sup> PR                       |
| 380 - 388   | 1086.61  | 1085.61   | 1085.62   | -0.01 | 1 YLPPARLEK                                    |
| 393 - 417   | 2740.21  | 2739.21   | 2739.25   | -0.04 | 0 DAISDGCFSFSECTIEHVSIGISS <sup>R</sup>        |
| 426 - 443   | 2143.96  | 2142.96   | 2142.79   | 0.17  | 0 DTMMMGADQYETEETSK <sup>3</sup> Oxidation (M) |
| 462 - 470   | 1106.52  | 1105.52   | 1105.50   | 0.02  | 0 NCIIDM <sup>N</sup> AR                       |
| 474 - 496   | 2632.25  | 2631.25   | 2631.26   | -0.01 | 0 NVHANTQGVQESDHPPEEGYIR                       |

### Spot 1578

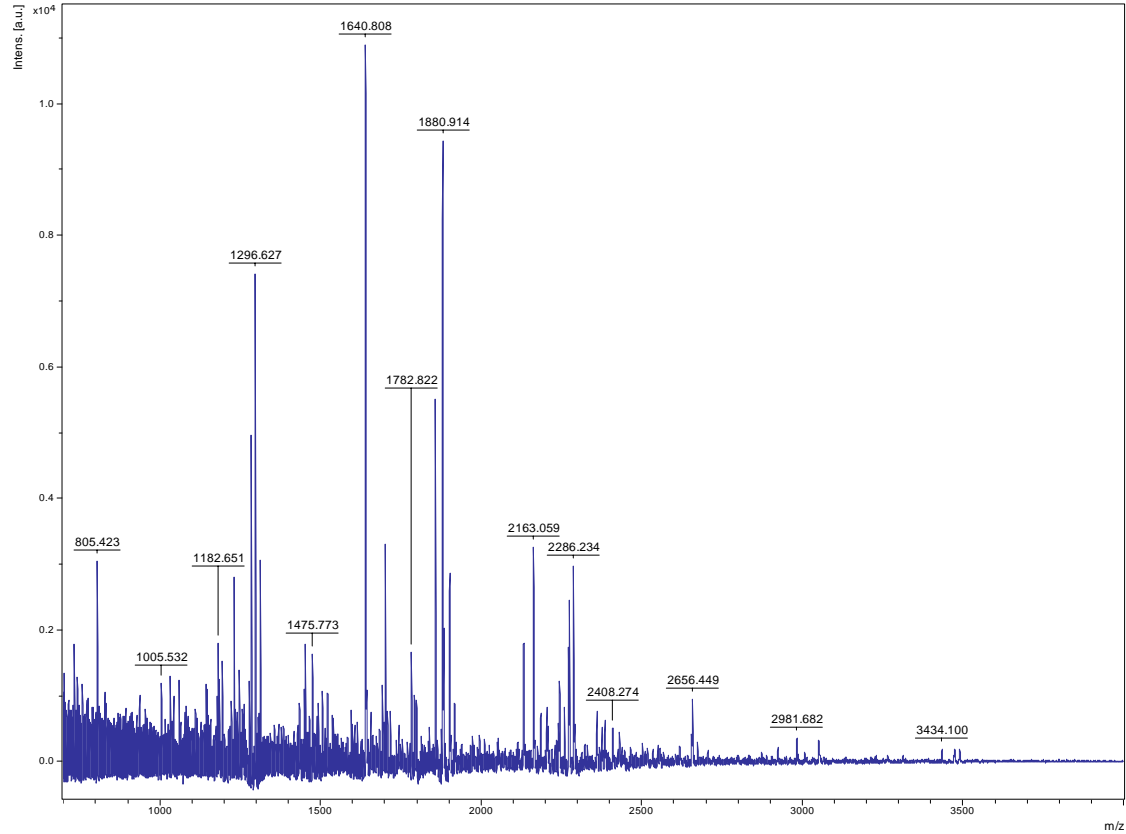

Match to: [gi|50919629](#); Score: 83

#### Matched peptides:

| Start - End | Observed | Mr (expt) | Mr (calc) | Delta | Miss Sequence                         |
|-------------|----------|-----------|-----------|-------|---------------------------------------|
| 43 - 57     | 1640.79  | 1639.79   | 1639.80   | -0.01 | 0 AIVAESCDVPAPQQR                     |
| 64 - 86     | 2656.37  | 2655.37   | 2655.33   | 0.04  | 1 ILKDEQTLASYGVETDHTIHMVR             |
| 164 - 182   | 2242.23  | 2241.23   | 2241.13   | 0.10  | 0 EIMNMPLMQNILNSPDLIR                 |
| 164 - 182   | 2258.25  | 2257.24   | 2257.13   | 0.12  | 0 EIMNMPLMQNILNSPDLIR Oxidation (M)   |
| 164 - 182   | 2290.22  | 2289.21   | 2289.12   | 0.10  | 0 EIMNMPLMQNILNSPDLIR 3 Oxidation (M) |
| 183 - 192   | 1230.60  | 1229.60   | 1229.60   | 0.00  | 0 NIIMNPNQMR                          |
| 183 - 192   | 1246.62  | 1245.61   | 1245.60   | 0.02  | 0 NIIMNPNQMR Oxidation (M)            |
| 193 - 212   | 2286.17  | 2285.16   | 2285.21   | -0.05 | 1 EIVDRNPDLAHVLNDPSILR                |
| 234 - 249   | 1782.79  | 1781.79   | 1781.81   | -0.02 | 0 AMSNIESSPEGFNMLR                    |
| 234 - 249   | 1798.80  | 1797.79   | 1797.80   | -0.01 | 0 AMSNIESSPEGFNMLR Oxidation (M)      |
| 251 - 271   | 2360.24  | 2359.23   | 2359.05   | 0.19  | 0 MYETVQEPFLNATTMAGEGDR               |
| 272 - 289   | 1856.89  | 1855.88   | 1855.89   | -0.01 | 0 SSNPFSAALLGNHGSNQAR                 |
| 411 - 420   | 1296.63  | 1295.62   | 1295.60   | 0.03  | 0 EMFQNPFEFVR                         |
| 411 - 420   | 1312.65  | 1311.65   | 1311.59   | 0.06  | 0 EMFQNPFEFVR Oxidation (M)           |

### Spot 1582

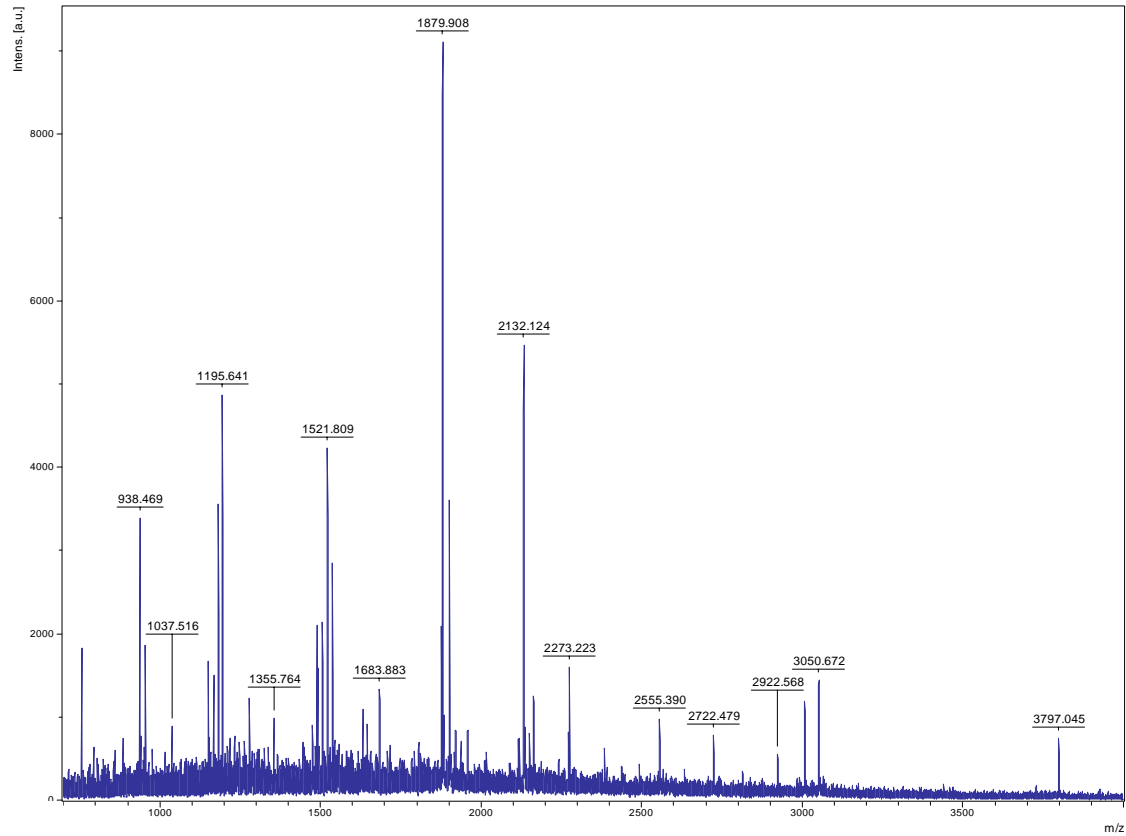

Match to: gi|62734634 Score: 87 Expect: 0.00013

#### Matched peptides:

| Start - End | Observed  | Mr (expt) | Mr (calc) | Delta   | Miss Sequence                                               |
|-------------|-----------|-----------|-----------|---------|-------------------------------------------------------------|
| 112 - 121   | 1195.6064 | 1194.5991 | 1194.6284 | -0.0293 | 0 K.YEIQGFPTL.K.I                                           |
| 138 - 147   | 1150.5634 | 1149.5561 | 1149.5917 | -0.0356 | 0 R.EAEGIVEYLK.K                                            |
| 138 - 148   | 1278.6623 | 1277.6550 | 1277.6866 | -0.0316 | 1 R.EAEGIVEYLKK.Q                                           |
| 159 - 171   | 1445.6741 | 1444.6668 | 1444.7045 | -0.0377 | 1 K.SPEDATNLIDDK.I                                          |
| 172 - 195   | 2722.3547 | 2721.3474 | 2721.3788 | -0.0314 | 0 K.IYIVGIFSELSGTEYTNFIEVAEKL                               |
| 196 - 213   | 2149.0312 | 2148.0239 | 2148.0613 | -0.0374 | 1 K.LRSDYDFGHTLHANHLPR.G                                    |
| 214 - 224   | 1182.6317 | 1181.6244 | 1181.6516 | -0.0272 | 0 R.GDAAVERPLVR.L                                           |
| 225 - 237   | 1536.8042 | 1535.7969 | 1535.8235 | -0.0266 | 0 R.LFKPFDELVVDSK.D                                         |
| 225 - 246   | 2555.2728 | 2554.2655 | 2554.3206 | -0.0551 | 1 R.LFKPFDELVVDSKDFDVTALEK.F                                |
| 238 - 246   | 1037.4670 | 1036.4597 | 1036.5077 | -0.0479 | 0 K.DFDVTALEK.F                                             |
| 247 - 261   | 1654.7833 | 1653.7760 | 1653.8613 | -0.0853 | 1 K.FIDASSTPKVVTFDK.N                                       |
| 256 - 271   | 1899.9646 | 1898.9573 | 1898.9890 | -0.0317 | 1 K.VVTFDKNPDNHPYLLK.F                                      |
| 272 - 279   | 885.3964  | 884.3891  | 884.4392  | -0.0501 | 0 K.FFQSSAAK.A                                              |
| 296 - 306   | 1263.5781 | 1262.5708 | 1262.5818 | -0.0110 | 0 K.SVYYGAAEEFK.D                                           |
| 296 - 308   | 1506.6787 | 1505.6714 | 1505.7038 | -0.0323 | 1 K.SVYYGAAEEFKD.K.E                                        |
| 312 - 330   | 2132.0459 | 2131.0386 | 2131.0737 | -0.0351 | 0 K.FLIGDIEASQGFQYFGLR.E                                    |
| 331 - 345   | 1683.8287 | 1682.8214 | 1682.8726 | -0.0512 | 0 R.EDQVPLIIQDGESK.K                                        |
| 331 - 346   | 1811.9414 | 1810.9341 | 1810.9676 | -0.0335 | 1 R.EDQVPLIIQDGESKK.F                                       |
| 350 - 362   | 1521.7805 | 1520.7732 | 1520.7987 | -0.0255 | 0 K.AHVEPDQIVSWLK.E                                         |
| 363 - 368   | 758.2465  | 757.2392  | 757.3282  | -0.0890 | 0 K.EYFDGK.L                                                |
| 375 - 400   | 2922.4203 | 2921.4130 | 2921.4810 | -0.0679 | 1 K.SEPIPEVNDPEPKVVVADNVHDFVFK.S                            |
| 388 - 400   | 1488.7486 | 1487.7413 | 1487.7772 | -0.0359 | 0 K.VVVADNVHDFVFK.S                                         |
| 404 - 418   | 1822.8669 | 1821.8596 | 1821.8330 | 0.0266  | 0 K.NVLVEFYAPWCGHCK.K Carbamidomethyl (C)                   |
| 404 - 418   | 1879.8442 | 1878.8369 | 1878.8545 | -0.0176 | 0 K.NVLVEFYAPWCGHCK.K 2 Carbamidomethyl (C)                 |
| 404 - 419   | 1992.9934 | 1991.9861 | 1991.9385 | 0.0476  | 1 K.NVLVEFYAPWCGHCKK.L Acetyl (N-term); Carbamidomethyl (C) |
| 420 - 432   | 1355.7282 | 1354.7209 | 1354.7708 | -0.0498 | 0 K.LAPILDEAATTLK.S                                         |
| 470 - 477   | 938.3990  | 937.3917  | 937.4327  | -0.0410 | 0 K.MVPYESGR.T                                              |
| 470 - 477   | 954.3929  | 953.3856  | 953.4276  | -0.0420 | 0 K.MVPYESGR.T Oxidation (M)                                |

## Spot 1584

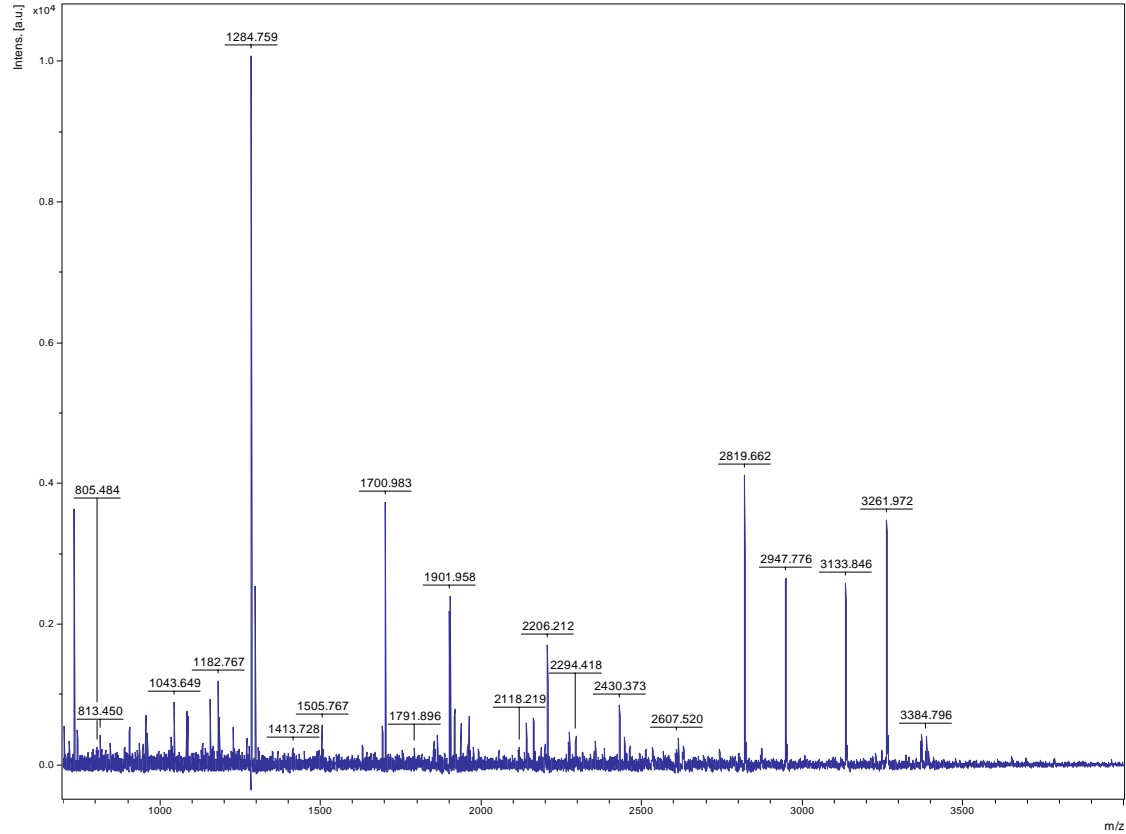

Match to: gi|34897924 Score: 166 Expect: 1.7e-12

### Matched peptides:

| Start - End | Observed  | Mr (expt) | Mr (calc) | Delta   | Miss Sequence                                       |
|-------------|-----------|-----------|-----------|---------|-----------------------------------------------------|
| 1 - 24      | 2355.2125 | 2354.2052 | 2354.1497 | 0.0555  | 0 -_MASTFGATSTVGLMAAPTGVSDK.K Acetyl (N-term)       |
| 79 - 90     | 1182.7687 | 1181.7614 | 1181.7019 | 0.0595  | 0 K.LADLVGVTLGPK.G                                  |
| 105 - 114   | 1043.6466 | 1042.6393 | 1042.5771 | 0.0623  | 0 R.IVNDGVTVAR.E                                    |
| 137 - 161   | 2430.2476 | 2429.2403 | 2429.2649 | -0.0245 | 0 K.TNDLAGDGTTSVVLAAQLIAEGVK.V                      |
| 162 - 174   | 1295.8140 | 1294.8067 | 1294.7357 | 0.0711  | 0 K.VVAAGANPVQTR.G                                  |
| 227 - 236   | 1087.6666 | 1086.6593 | 1086.6033 | 0.0561  | 1 R.KGVVTLLEGR.S                                    |
| 237 - 252   | 1901.9087 | 1900.9014 | 1900.8624 | 0.0390  | 0 R.SSENNLYVVEGMQFER.G                              |
| 237 - 252   | 1917.9202 | 1916.9129 | 1916.8574 | 0.0556  | 0 R.SSENNLYVVEGMQFER.G Oxidation (M)                |
| 253 - 265   | 1505.7872 | 1504.7799 | 1504.7085 | 0.0714  | 0 R.GYISPYVTDSEK.M                                  |
| 287 - 297   | 1284.7699 | 1283.7626 | 1283.7085 | 0.0542  | 0 R.DLINVLEAIR.G                                    |
| 333 - 339   | 733.3615  | 732.3542  | 732.3554  | -0.0012 | 0 K.APGFGER.K                                       |
| 341 - 357   | 1863.0694 | 1862.0621 | 1862.0149 | 0.0472  | 0 K.TQYLLDIIALTGATVIR.D                             |
| 341 - 366   | 2819.4547 | 2818.4474 | 2818.4963 | -0.0489 | 1 K.TQYLLDIIALTGATVIRDEVGLSLDK.A                    |
| 383 - 400   | 1936.9637 | 1935.9564 | 1935.9385 | 0.0179  | 1 K.ESTTIVDGGTQEEVTKR.V                             |
| 406 - 419   | 1693.8851 | 1692.8778 | 1692.8206 | 0.0573  | 1 K.NLIEAAEQEYEKEK.L                                |
| 427 - 447   | 2141.1805 | 2140.1732 | 2140.1738 | -0.0006 | 1 K.LAGGVAVIQVGAQTETELKEK.K                         |
| 460 - 476   | 1700.9559 | 1699.9486 | 1699.8926 | 0.0560  | 0 K.AAVEEGIVVGGCTLLR.L Carbamidomethyl (C)          |
| 477 - 485   | 956.5011  | 955.4938  | 955.5814  | -0.0876 | 1 R.LAARVDAIK.D                                     |
| 534 - 556   | 2446.1295 | 2445.1222 | 2445.1521 | -0.0299 | 0 K.FGYNAATGQYEDLMAAGIIDPTK.V                       |
| 571 - 601   | 3384.6155 | 3383.6082 | 3383.6118 | -0.0036 | 1 K.TFLTSDVVVVEIKEPEPAPVTNPMDNSGYG.Y- Oxidation (M) |



## Spot 1585

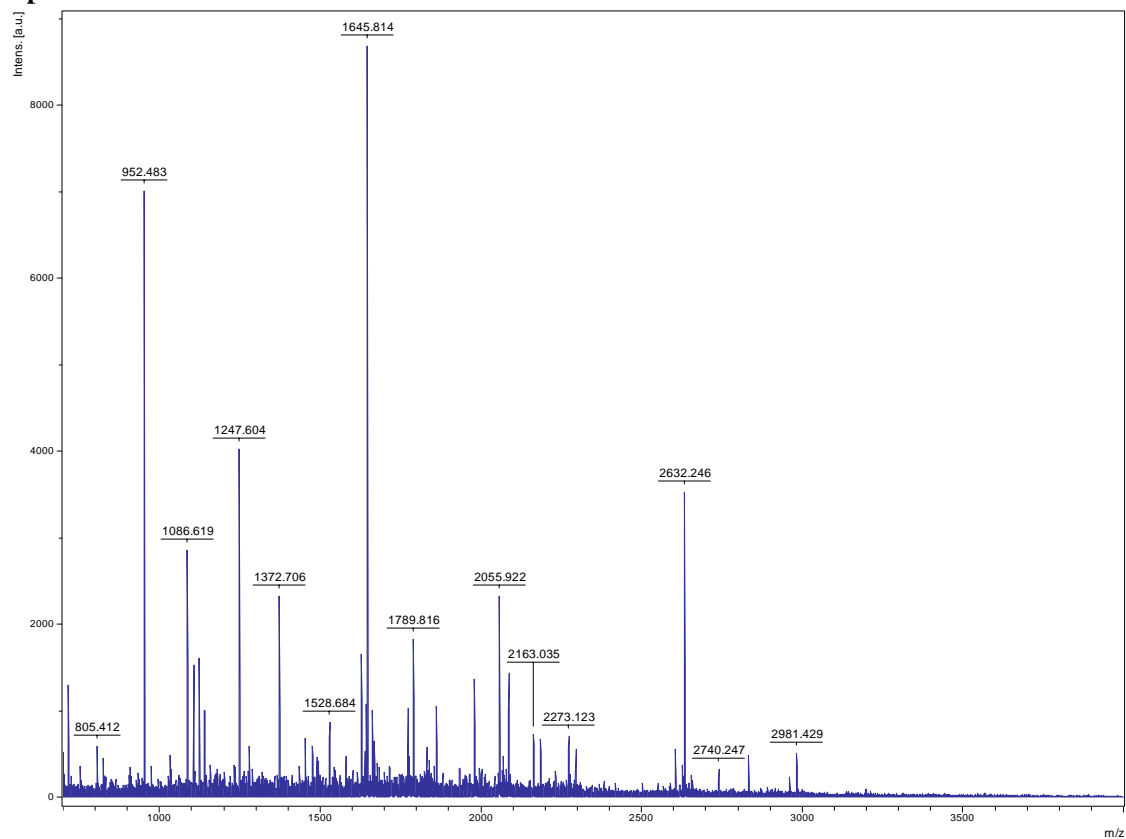

Match to: gi|55296000; Score: 157

### Matched peptides:

| Start - End | Observed | Mr (expt) | Mr (calc) | Delta | Miss Sequence                                       |
|-------------|----------|-----------|-----------|-------|-----------------------------------------------------|
| 54 - 68     | 1789.82  | 1788.81   | 1788.82   | -0.01 | 1 CVFTSDADRDTPHLR                                   |
| 75 - 102    | 2831.45  | 2830.45   | 2830.46   | -0.01 | 0 NYADASHVSAVILGGGTGVQLFPLTSTR                      |
| 103 - 114   | 1247.60  | 1246.60   | 1246.61   | -0.01 | 0 ATPAVPVGGCYR                                      |
| 131 - 144   | 1627.80  | 1626.80   | 1626.82   | -0.02 | 0 IPVMTQFNASLNR                                     |
| 131 - 144   | 1643.81  | 1642.80   | 1642.81   | -0.01 | 0 IPVMTQFNASLNR Oxidation (M)                       |
| 224 - 242   | 2055.92  | 2054.92   | 2054.93   | -0.01 | 0 HVDDNADITISCAPIDGSR                               |
| 287 - 301   | 1772.78  | 1771.78   | 1771.92   | -0.14 | 1 QKYPYIASMGIVLK Oxidation (M); Pyro-glu (N-term Q) |
| 289 - 302   | 1661.78  | 1660.78   | 1660.89   | -0.11 | 1 YPYIASMGIVLKK Oxidation (M)                       |
| 311 - 326   | 1860.95  | 1859.94   | 1859.95   | -0.01 | 1 SKYAHLQDFGSEILPR                                  |
| 313 - 326   | 1645.81  | 1644.81   | 1644.83   | -0.01 | 0 YAHLQDFGSEILPR                                    |
| 350 - 371   | 2604.22  | 2603.22   | 2603.26   | -0.04 | 1 SFFDANLALTEQPPKFEFYDPK                            |
| 372 - 379   | 952.48   | 951.48    | 951.48    | -0.00 | 0 TPFFTSPR                                          |
| 380 - 388   | 1086.62  | 1085.62   | 1085.62   | -0.01 | 1 YLPPARLEK                                         |
| 391 - 417   | 2981.43  | 2980.43   | 2980.43   | -0.00 | 1 IKDAISDGCSECTIEHSVIGISSR                          |
| 393 - 417   | 2740.25  | 2739.25   | 2739.25   | -0.00 | 0 DAISDGCSECTIEHSVIGISSR                            |
| 462 - 470   | 1106.51  | 1105.51   | 1105.50   | 0.01  | 0 NCIIDMNAR                                         |
| 462 - 470   | 1122.48  | 1121.47   | 1121.50   | -0.02 | 0 NCIIDMNAR Oxidation (M)                           |
| 474 - 496   | 2632.25  | 2631.24   | 2631.26   | -0.01 | 0 NVHANTQGVQESDHPEEGYYIR                            |

# Spot 1590

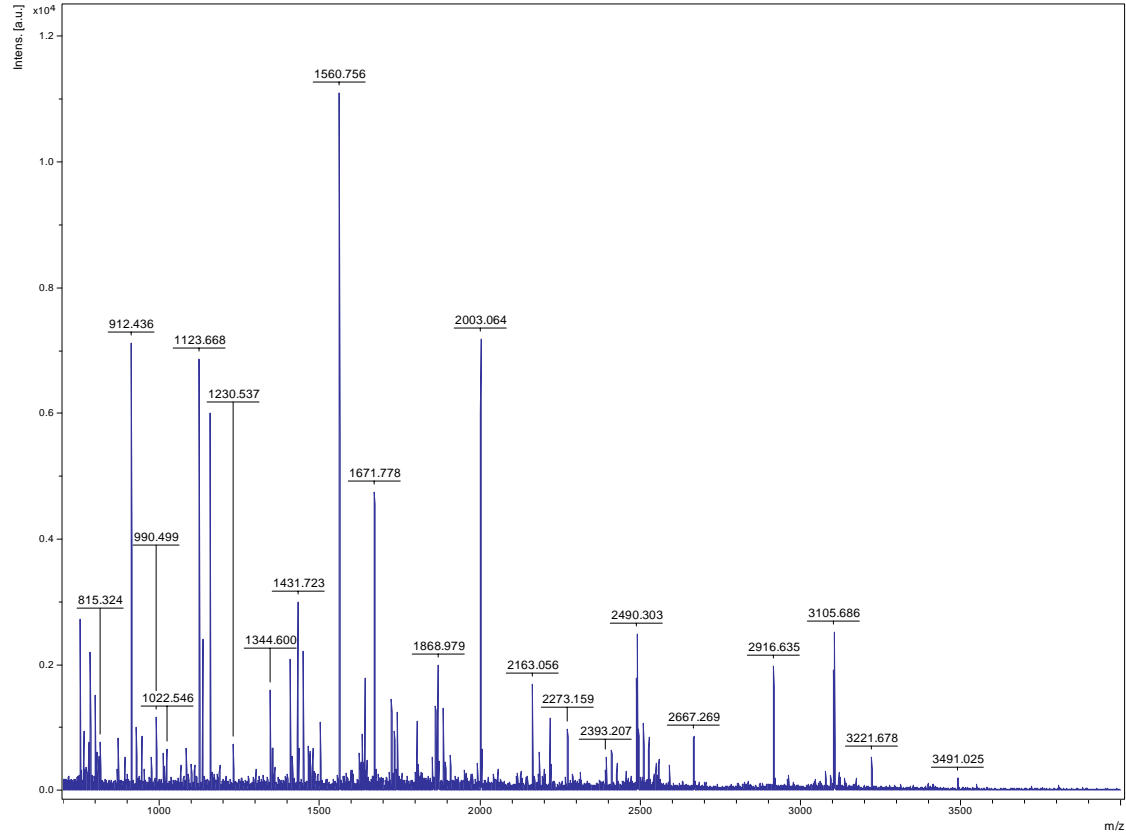

Match to: gj|115465273 Score: 179 Expect: 1.7e-13

## Matched peptides:

| Start - End | Observed  | Mr (expt) | Mr (calc) | ppm | Miss Sequence                                 |
|-------------|-----------|-----------|-----------|-----|-----------------------------------------------|
| 53 - 64     | 1344.6004 | 1343.5931 | 1343.6429 | -37 | 1 R.AADENIREEAAR.H                            |
| 67 - 90     | 2667.2689 | 2666.2617 | 2666.1938 | 25  | 0 R.APNHNFAAWYAPFPAPNGDPDER.Y                 |
| 91 - 99     | 1157.5551 | 1156.5478 | 1156.5764 | -25 | 0 R.YSLDEIVYR.S                               |
| 100 - 109   | 990.4992  | 989.4919  | 989.5142  | -23 | 0 R.SSSGGLLDVYR.H                             |
| 110 - 117   | 928.4156  | 927.4083  | 927.4232  | -16 | 0 R.HDMDALAR.F                                |
| 110 - 117   | 944.4156  | 943.4083  | 943.4182  | -10 | 0 R.HDMDALAR.F Oxidation (M)                  |
| 118 - 124   | 912.4357  | 911.4285  | 911.4290  | -1  | 0 R.FPGSYWR.D                                 |
| 134 - 145   | 1352.6109 | 1351.6036 | 1351.6561 | -39 | 0 R.TTWPFSGVWVK.K                             |
| 174 - 188   | 1724.8503 | 1723.8430 | 1723.8828 | -23 | 1 R.LGRDHLAQMNDLWVK.H                         |
| 174 - 188   | 1740.8518 | 1739.8446 | 1739.8777 | -19 | 1 R.LGRDHLAQMNDLWVK.H Oxidation (M)           |
| 177 - 188   | 1414.5938 | 1413.5865 | 1413.6711 | -60 | 0 R.DHLAQMNDLWVK.H Oxidation (M)              |
| 189 - 199   | 1230.5366 | 1229.5293 | 1229.5612 | -26 | 0 K.HCGISHTGSFK.D                             |
| 200 - 212   | 1431.7226 | 1430.7153 | 1430.7552 | -28 | 0 K.DLGMTVLVSQVNR.L                           |
| 200 - 212   | 1447.7121 | 1446.7048 | 1446.7501 | -31 | 0 K.DLGMTVLVSQVNR.L Oxidation (M)             |
| 288 - 305   | 2003.0640 | 2002.0568 | 2002.0735 | -8  | 0 R.EVTAELPIYLANSLNLR.L                       |
| 288 - 310   | 2558.4376 | 2557.4303 | 2557.3751 | 22  | 1 R.EVTAELPIYLANSLNLRLEGQK.T                  |
| 344 - 349   | 815.3242  | 814.3169  | 814.3102  | 8   | 0 K.GFEMCR.V Oxidation (M)                    |
| 350 - 359   | 1123.6679 | 1122.6606 | 1122.6873 | -24 | 1 R.VLGLVDRVPR.L                              |
| 360 - 373   | 1560.7557 | 1559.7484 | 1559.7878 | -25 | 0 R.LVCAQAANANPLYR.Y                          |
| 377 - 405   | 3105.6864 | 3104.6791 | 3104.5091 | 55  | 0 K.SGWTEFTPQVAEPTFAAIQIGDPVSVDR.A            |
| 412 - 434   | 2495.1718 | 2494.1646 | 2494.1203 | 18  | 0 K.ATDGIVEEATEEELMNAMSLADR.T                 |
| 412 - 434   | 2511.1625 | 2510.1552 | 2510.1152 | 16  | 0 K.ATDGIVEEATEEELMNAMSLADR.T Oxidation (M)   |
| 412 - 434   | 2527.1638 | 2526.1566 | 2526.1101 | 18  | 0 K.ATDGIVEEATEEELMNAMSLADR.T 2 Oxidation (M) |
| 435 - 452   | 1907.9182 | 1906.9109 | 1906.9434 | -17 | 0 R.TGMFACPHTGVALAALFK.L Oxidation (M)        |
| 488 - 494   | 866.4421  | 865.4348  | 865.3674  | 78  | 0 K.IEDMACK.Y                                 |
| 495 - 503   | 974.5186  | 973.5113  | 973.5233  | -12 | 0 K.YANPPVSVK.A                               |

## Spot 1599

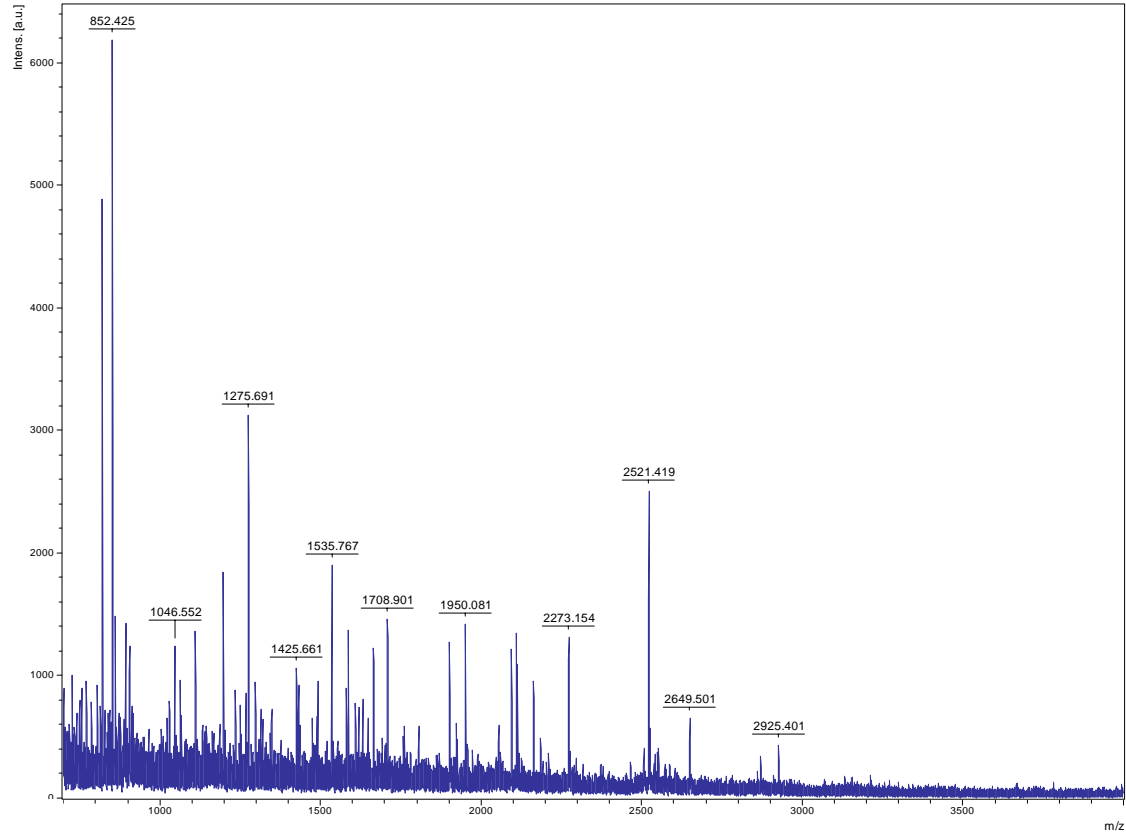

Match to: gi|37535140 Score: 111 Expect: 5.3e-07

### Matched peptides:

| Start - End | Observed  | Mr (expt) | Mr (calc) | Delta   | Miss Sequence                            |
|-------------|-----------|-----------|-----------|---------|------------------------------------------|
| 50 - 59     | 1030.5398 | 1029.5325 | 1029.5342 | -0.0017 | 0 R.GVEELADAVK.V                         |
| 137 - 148   | 1235.5787 | 1234.5714 | 1234.5798 | -0.0083 | 0 K.SVAAGMNAMDLR.R                       |
| 137 - 148   | 1267.6092 | 1266.6019 | 1266.5696 | 0.0323  | 0 K.SVAAGMNAMDLR.R 2 Oxidation (M)       |
| 150 - 163   | 1433.7358 | 1432.7285 | 1432.7595 | -0.0310 | 0 R.GISMAVDAVVTNLK.G Oxidation (M)       |
| 168 - 187   | 2093.0461 | 2092.0388 | 2092.0106 | 0.0283  | 0 R.MISTSEEIAQVGTISANGER.E               |
| 168 - 187   | 2109.0518 | 2108.0445 | 2108.0055 | 0.0390  | 0 R.MISTSEEIAQVGTISANGER.E Oxidation (M) |
| 188 - 199   | 1347.7413 | 1346.7340 | 1346.7115 | 0.0225  | 1 R.EIGELIAKAMEK.V Oxidation (M)         |
| 244 - 256   | 1580.8133 | 1579.8060 | 1579.7916 | 0.0144  | 0 K.CELDDPLLIHDK.K Carbamidomethyl (C)   |
| 244 - 257   | 1708.8985 | 1707.8912 | 1707.8865 | 0.0047  | 1 K.CELDDPLLIHDK.V Carbamidomethyl (C)   |
| 274 - 297   | 2649.4764 | 2648.4691 | 2648.5112 | -0.0420 | 1 K.KQRPLLIIVAEVVESEALGTLINK.L           |
| 275 - 297   | 2521.4372 | 2520.4299 | 2520.4162 | 0.0137  | 0 K.QRPLLIIVAEVVESEALGTLINK.L            |
| 382 - 395   | 1585.7763 | 1584.7690 | 1584.7519 | 0.0172  | 1 R.SAIELSTSDYDKEK.L                     |
| 436 - 455   | 1901.0427 | 1900.0354 | 1900.0305 | 0.0050  | 0 K.AAVEEGIVPGGGVALLYASK.E               |
| 469 - 479   | 1196.7303 | 1195.7230 | 1195.7288 | -0.0058 | 0 K.IGVIIQNALK.T                         |
| 500 - 514   | 1665.8102 | 1664.8029 | 1664.7893 | 0.0136  | 0 K.LLEQDNTDLGYDAK.G                     |

## Spot 1602

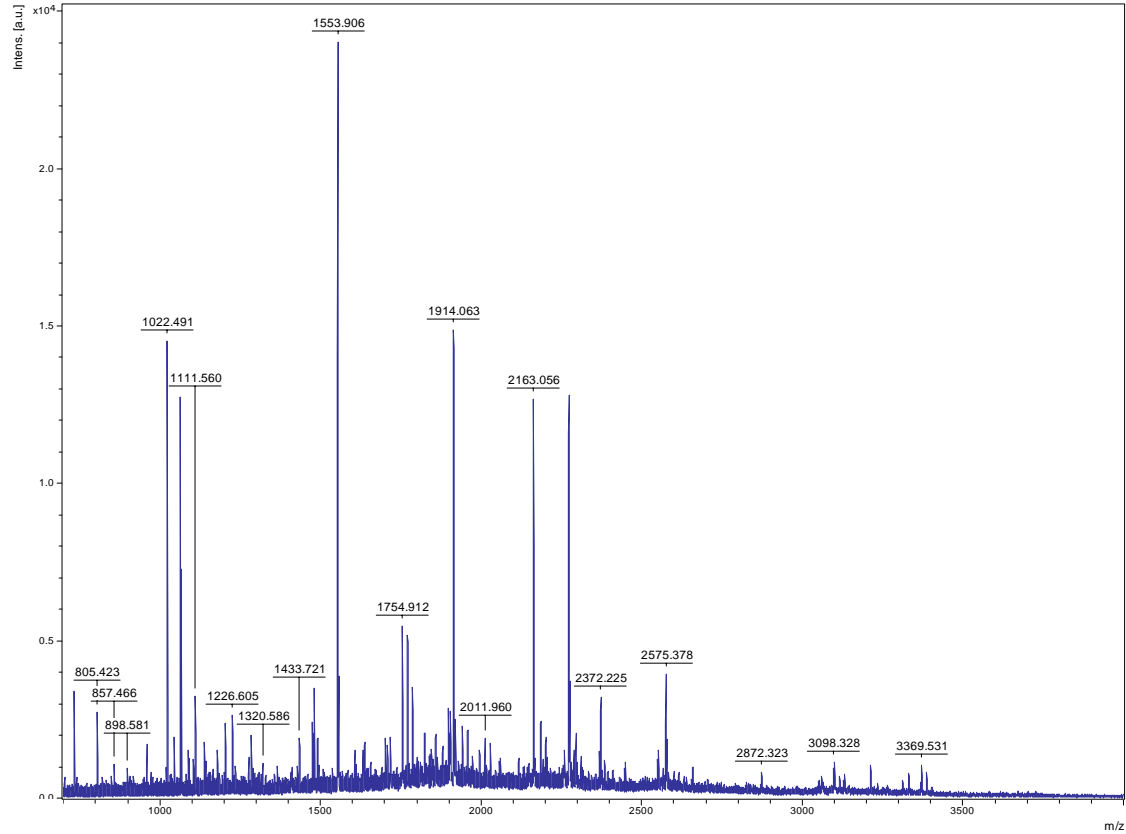

Match to: gi|50920285 Score: 101 Expect: 5.3e-06

### Matched peptides:

| Start - End | Observed  | Mr (expt) | Mr (calc) | Delta   | Miss Sequence |                                                          |
|-------------|-----------|-----------|-----------|---------|---------------|----------------------------------------------------------|
| 2 - 19      | 1958.0010 | 1956.9937 | 1956.9649 | 0.0289  | 0             | M.ATMPSTCASSSLFLLLR.R Carbamidomethyl (C); Oxidation (M) |
| 46 - 54     | 1022.4643 | 1021.4570 | 1021.4828 | -0.0258 | 0             | K.EIAFDQGS.R                                             |
| 64 - 75     | 1138.6966 | 1137.6893 | 1137.6869 | 0.0024  | 0             | K.LAAAVAVTLGPR.G                                         |
| 78 - 88     | 1204.6398 | 1203.6325 | 1203.6135 | 0.0190  | 0             | R.NVVLDFGSPK.V                                           |
| 89 - 98     | 1043.5608 | 1042.5535 | 1042.5771 | -0.0235 | 0             | K.VVNDGVTIAR.A                                           |
| 99 - 115    | 1754.9142 | 1753.9069 | 1753.9032 | 0.0037  | 0             | R.AIELADPMENAGAALIRE                                     |
| 99 - 115    | 1770.9308 | 1769.9235 | 1769.8981 | 0.0254  | 0             | R.AIELADPMENAGAALIRE Oxidation (M)                       |
| 121 - 137   | 1636.8267 | 1635.8194 | 1635.7700 | 0.0495  | 0             | K.TNDSAGDGTTSVLR.E                                       |
| 175 - 185   | 1143.5770 | 1142.5697 | 1142.6407 | -0.0710 | 1             | K.SRPVKGSGDIK.A                                          |
| 238 - 250   | 1479.7733 | 1478.7660 | 1478.7405 | 0.0255  | 0             | R.GYISPGFVTNPEK.S                                        |
| 272 - 284   | 1553.9252 | 1552.9179 | 1552.8824 | 0.0355  | 0             | K.EHPLLEQTTQLR.A                                         |
| 363 - 385   | 2447.1587 | 2446.1514 | 2446.2915 | -0.1400 | 1             | K.VTISQSSTTIADVATKDEIQAR.I                               |
| 380 - 390   | 1284.7164 | 1283.7091 | 1283.7197 | -0.0106 | 1             | K.DEIQARIAQLK.R                                          |
| 421 - 432   | 1290.6571 | 1289.6498 | 1289.6099 | 0.0399  | 0             | K.VGAATETELEDK.K                                         |
| 441 - 464   | 2372.1584 | 2371.1511 | 2371.2171 | -0.0660 | 0             | K.NATFAAIEEGIVPGGAAVYVHLSK.F                             |
| 488 - 510   | 2271.2169 | 2270.2096 | 2270.2633 | -0.0537 | 0             | K.ALVAPAALIAHNAGVEGEVIVEK.I                              |
| 527 - 540   | 1490.7881 | 1489.7808 | 1489.7888 | -0.0080 | 0             | R.HENLVQAGVIDPAK.V                                       |

## Spot 1603

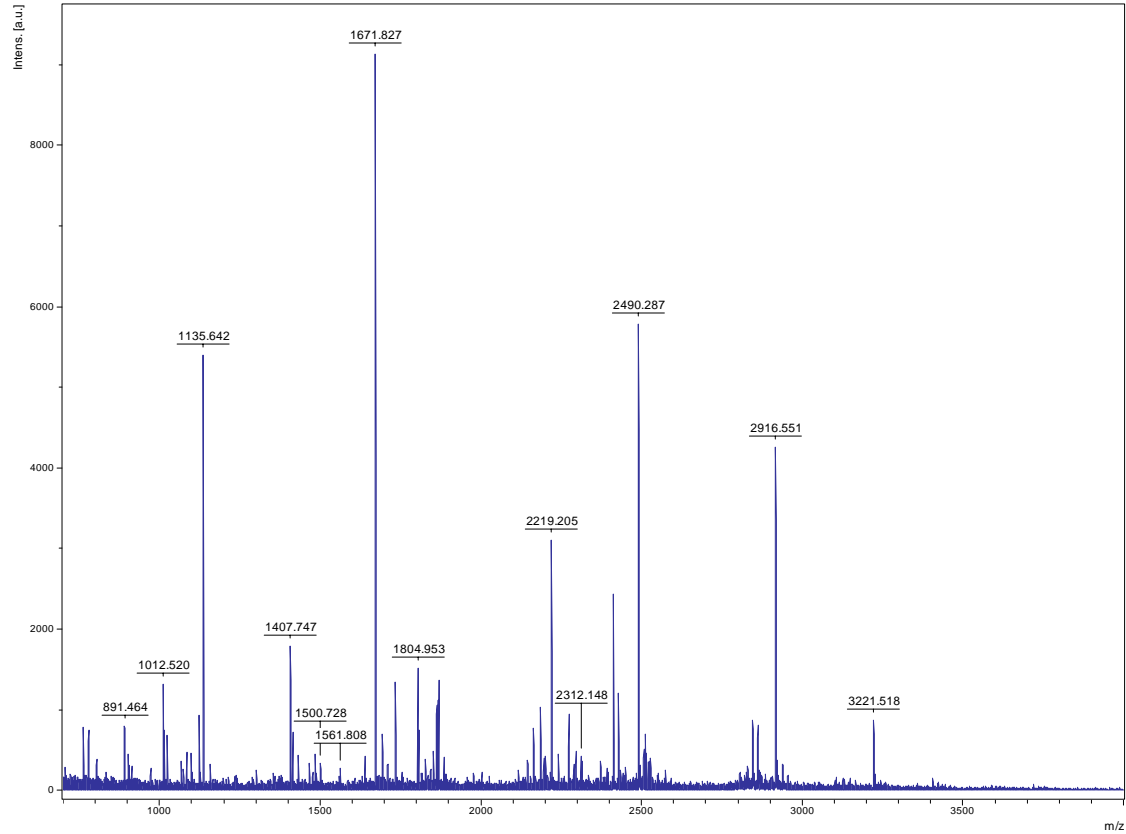

Match to: gi|56784135; Score: 131

### Matched peptides:

| Start - End | Observed | Mr (expt) | Mr (calc) | Delta | Miss Sequence                       |
|-------------|----------|-----------|-----------|-------|-------------------------------------|
| 42 - 48     | 891.46   | 890.46    | 890.43    | 0.03  | 0 WGPQFEK                           |
| 57 - 82     | 2916.55  | 2915.55   | 2915.51   | 0.04  | 0 LYLSEQTDGTVPNLVIANCEVVKPR         |
| 83 - 97     | 1671.83  | 1670.82   | 1670.80   | 0.02  | 0 VAAAEHISQFNEEAR                   |
| 106 - 115   | 1135.64  | 1134.64   | 1134.61   | 0.03  | 0 TIIHPGEVNR                        |
| 116 - 124   | 1084.63  | 1083.63   | 1083.60   | 0.03  | 1 IRELPGNSK                         |
| 125 - 146   | 2490.29  | 2489.28   | 2489.26   | 0.03  | 0 IIATHTDSPDVLJWDVEAQPNR            |
| 147 - 162   | 1885.00  | 1884.00   | 1883.99   | 0.01  | 0 QAQLAQMESRPDLILR Oxidation (M)    |
| 283 - 311   | 3221.52  | 3220.52   | 3220.47   | 0.04  | 0 AHGGDVHCVDNLHDVNYILTGSADNSVR      |
| 317 - 334   | 1804.95  | 1803.95   | 1803.94   | 0.01  | 1 NLGGGAGIPVHKFEGHK                 |
| 371 - 387   | 1861.98  | 1860.97   | 1860.95   | 0.02  | 1 KNPAPAGLFFQHGHR                   |
| 372 - 387   | 1733.88  | 1732.88   | 1732.85   | 0.02  | 0 NPNAPAGLFFQHGHR                   |
| 424 - 443   | 2411.21  | 2410.20   | 2410.17   | 0.03  | 0 MSDLIYRPEDEVLALENFK               |
| 424 - 443   | 2427.18  | 2426.18   | 2426.17   | 0.01  | 0 MSDLIYRPEDEVLALENFK Oxidation (M) |
| 444 - 452   | 1012.52  | 1011.52   | 1011.49   | 0.03  | 0 THLASCAPR                         |

# Spot 1605

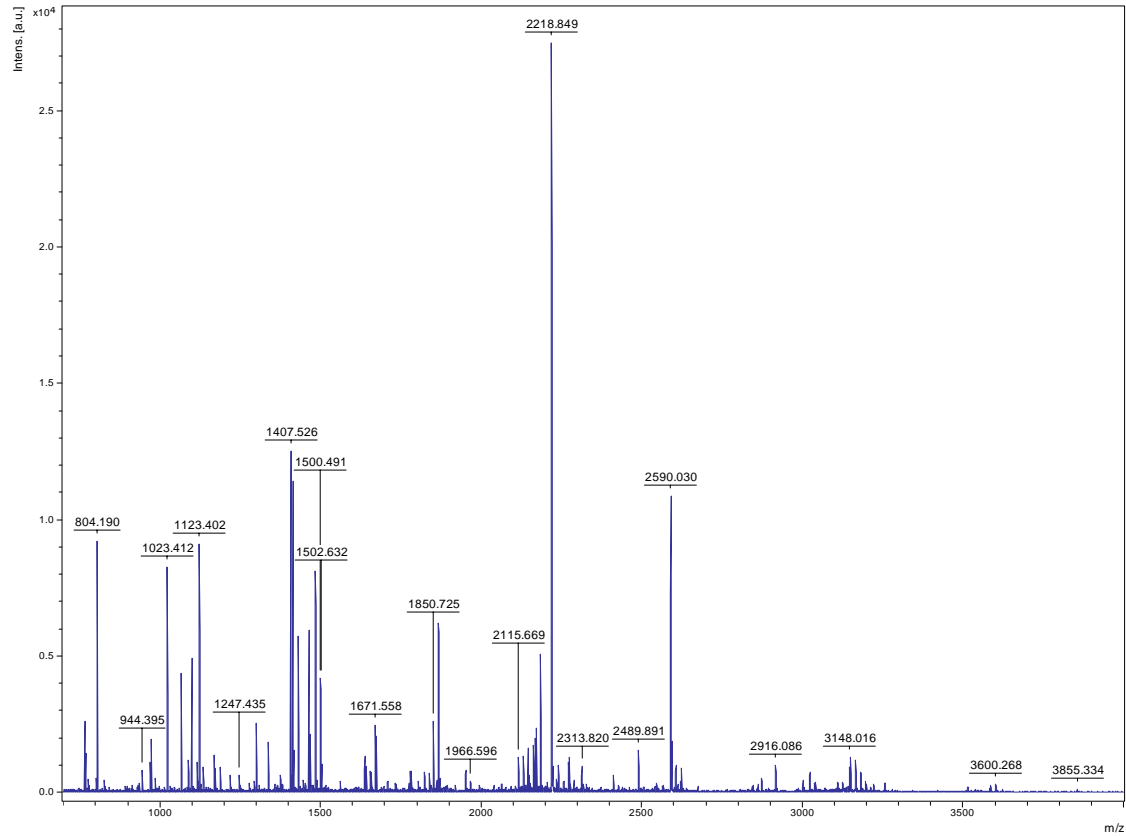

Match to: Q338N8\_ORYSA Score: 99 Expect: 8.2e-06

## Matched peptides:

| Start - End | Observed  | Mr (expt) | Mr (calc) | Delta   | Miss Sequence                                  |
|-------------|-----------|-----------|-----------|---------|------------------------------------------------|
| 1 - 23      | 2489.9024 | 2488.8951 | 2489.2406 | -0.3454 | 1 -...MAAPSVAVDNLNPKVLNCEYAVR.G Oxidation (M)  |
| 2 - 14      | 1337.5185 | 1336.5112 | 1336.6986 | -0.1874 | 0 M.AAPSVAVDNLNPK.V Acetyl (N-term)            |
| 15 - 23     | 1066.4208 | 1065.4135 | 1065.5277 | -0.1141 | 0 K.VLNCEYAVR.G                                |
| 15 - 23     | 1123.4185 | 1122.4112 | 1122.5491 | -0.1379 | 0 K.VLNCEYAVR.G Carbamidomethyl (C)            |
| 24 - 32     | 1022.4561 | 1021.4488 | 1021.5668 | -0.1180 | 0 R.GEIVHAQR.L                                 |
| 70 - 87     | 2183.7423 | 2182.7350 | 2183.0602 | -0.3252 | 1 R.EVIALCDHPCLLEKEETK.S 2 Carbamidomethyl (C) |
| 98 - 108    | 1099.5092 | 1098.5019 | 1098.6397 | -0.1378 | 0 R.ATTLASIPGR.A                               |
| 109 - 120   | 1219.4448 | 1218.4375 | 1218.5993 | -0.1617 | 0 R.ATGAYSHSQGIK.G                             |
| 124 - 133   | 944.3948  | 943.3875  | 943.5087  | -0.1211 | 0 R.DAIAAGIASR.D                               |
| 223 - 243   | 2218.8690 | 2217.8617 | 2218.1705 | -0.3088 | 0 R.ALVVINPGNPTGQVLAEEENQR.D                   |
| 282 - 300   | 2115.6812 | 2114.6739 | 2114.9830 | -0.3090 | 0 R.SMGYNEDDLPLVSFQSVSK.G                      |
| 282 - 300   | 2131.6871 | 2130.6798 | 2130.9779 | -0.2981 | 0 R.SMGYNEDDLPLVSFQSVSK.G Oxidation (M)        |
| 301 - 309   | 1089.3402 | 1088.3329 | 1088.4709 | -0.1379 | 1 K.GYYGECGKR.G Carbamidomethyl (C)            |
| 309 - 323   | 1640.5814 | 1639.5741 | 1639.8140 | -0.2399 | 1 K.RGGYMEITGFSAPVR.E                          |
| 309 - 323   | 1656.5713 | 1655.5640 | 1655.8089 | -0.2449 | 1 K.RGGYMEITGFSAPVR.E Oxidation (M)            |
| 310 - 323   | 1484.5151 | 1483.5078 | 1483.7129 | -0.2051 | 0 R.GGYMEITGFSAPVR.E                           |
| 310 - 323   | 1500.5107 | 1499.5034 | 1499.7078 | -0.2044 | 0 R.GGYMEITGFSAPVR.E Oxidation (M)             |
| 310 - 328   | 2145.7497 | 2144.7424 | 2145.0564 | -0.3140 | 1 R.GGYMEITGFSAPVREIQYK.V                      |
| 363 - 374   | 1300.5439 | 1299.5366 | 1299.7146 | -0.1780 | 1 K.AEKDGILQSLAR.R                             |
| 366 - 375   | 1170.4850 | 1169.4777 | 1169.6516 | -0.1739 | 1 K.DGILQSLARR.A Acetyl (N-term)               |
| 378 - 393   | 1780.5959 | 1779.5886 | 1779.8461 | -0.2575 | 0 K.ALENAFNSLEGITCNK.T Carbamidomethyl (C)     |
| 394 - 409   | 1838.6543 | 1837.6470 | 1837.9284 | -0.2814 | 0 K.TEGAMLYLPQLSLPQK.A Oxidation (M)           |
| 410 - 419   | 972.4299  | 971.4227  | 971.5399  | -0.1173 | 1 K.AIDAAKAANK.A                               |
| 416 - 428   | 1407.5415 | 1406.5342 | 1406.7306 | -0.1964 | 1 K.AANKAPDAFYALRL.L                           |
| 420 - 428   | 1023.4223 | 1022.4150 | 1022.5185 | -0.1035 | 0 K.APDAFYALR.L                                |
| 429 - 453   | 2590.3127 | 2589.3054 | 2589.4066 | -0.1012 | 0 R.LLEATGIVVVPGSGFGQVPGTWHIR.C                |
| 454 - 469   | 1867.7593 | 1866.7520 | 1867.0237 | -0.2717 | 1 R.CTILPQEEKIPAIISR.F Carbamidomethyl (C)     |
| 463 - 469   | 769.4154  | 768.4081  | 768.4857  | -0.0776 | 0 K.IPAISR.F                                   |
| 472 - 483   | 1414.4291 | 1413.4218 | 1413.6135 | -0.1917 | 1 K.AFHEGFMAAYRD.-                             |
| 472 - 483   | 1430.4200 | 1429.4127 | 1429.6084 | -0.1957 | 1 K.AFHEGFMAAYRD.- Oxidation (M)               |

## Spot 1608

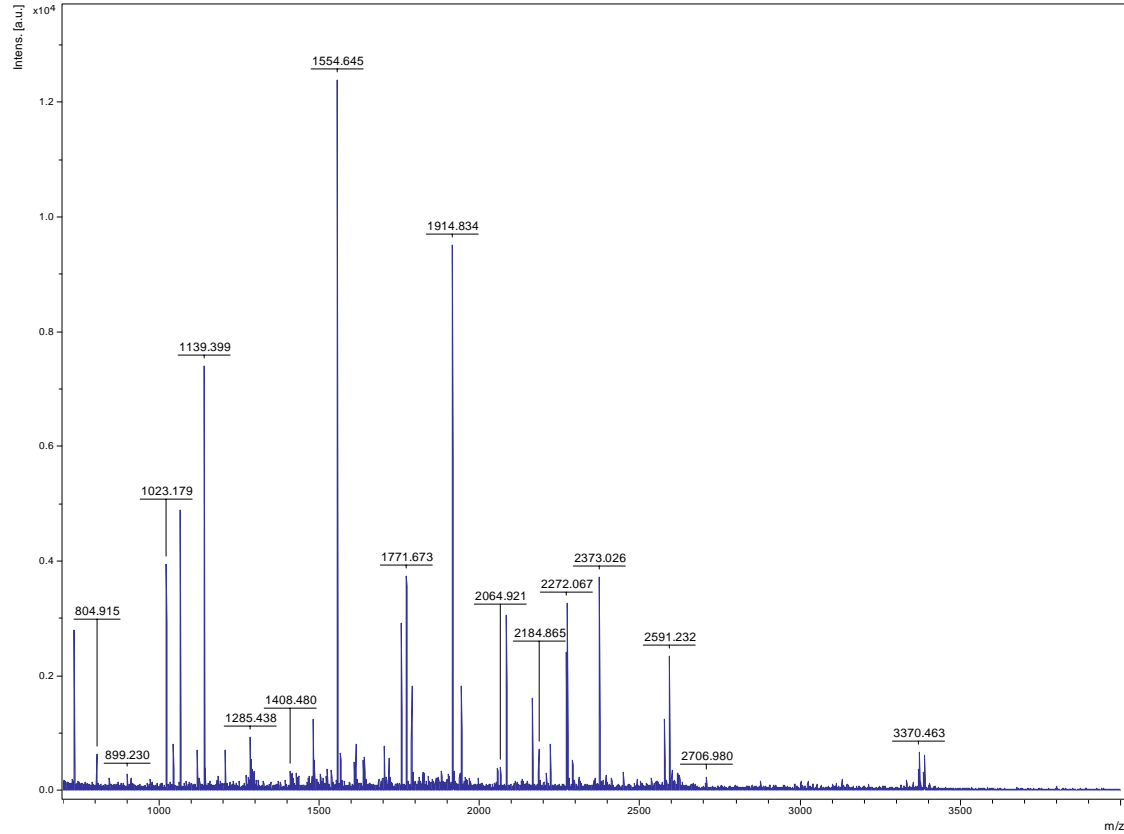

Match to: Q7X9A7\_ORYSA Score: 76 Expect: 0.0015

### Matched peptides:

| Start - End | Observed  | Mr (expt) | Mr (calc) | Delta   | Miss Sequence                        |
|-------------|-----------|-----------|-----------|---------|--------------------------------------|
| 46 - 54     | 1022.7796 | 1021.7723 | 1021.4828 | 0.2895  | 0 K.EIAFDQGSR.S                      |
| 64 - 75     | 1138.9837 | 1137.9764 | 1137.6869 | 0.2895  | 0 K.LAAAVAVTLGPR.G                   |
| 78 - 88     | 1204.8981 | 1203.8908 | 1203.6135 | 0.2773  | 0 R.NVVLDEFGSPK.V                    |
| 89 - 98     | 1043.8761 | 1042.8688 | 1042.5771 | 0.2918  | 0 K.VVNDGVTIAR.A                     |
| 99 - 115    | 1754.9139 | 1753.9066 | 1753.9032 | 0.0034  | 0 R.AIELADPMENAGAALIRE               |
| 99 - 115    | 1770.9127 | 1769.9054 | 1769.8981 | 0.0073  | 0 R.AIELADPMENAGAALIRE Oxidation (M) |
| 238 - 250   | 1479.9217 | 1478.9144 | 1478.7405 | 0.1739  | 0 R.GYISPOFVTNPEK.S                  |
| 267 - 284   | 2081.9621 | 2080.9548 | 2081.2096 | -0.2547 | 1 K.ISSIKHPLLEQTTQLR.A               |
| 272 - 284   | 1554.0299 | 1553.0226 | 1552.8824 | 0.1402  | 0 K.EHPLLEQTTQLR.A                   |
| 309 - 324   | 1613.0365 | 1612.0292 | 1611.9096 | 0.1196  | 1 R.GILNVAAIKAPGFGER.R               |
| 318 - 324   | 733.5913  | 732.5840  | 732.3554  | 0.2286  | 0 K.APGFGER.R                        |
| 327 - 343   | 1787.9763 | 1786.9690 | 1786.9828 | -0.0138 | 0 K.ALLQDIAIVTGAEFQAK.D              |
| 380 - 390   | 1284.9830 | 1283.9757 | 1283.7197 | 0.2560  | 1 K.DEIQARIAQLK.R                    |
| 421 - 432   | 1290.8829 | 1289.8756 | 1289.6099 | 0.2657  | 0 K.VGAATETELEDK.K                   |

## Spot 1611

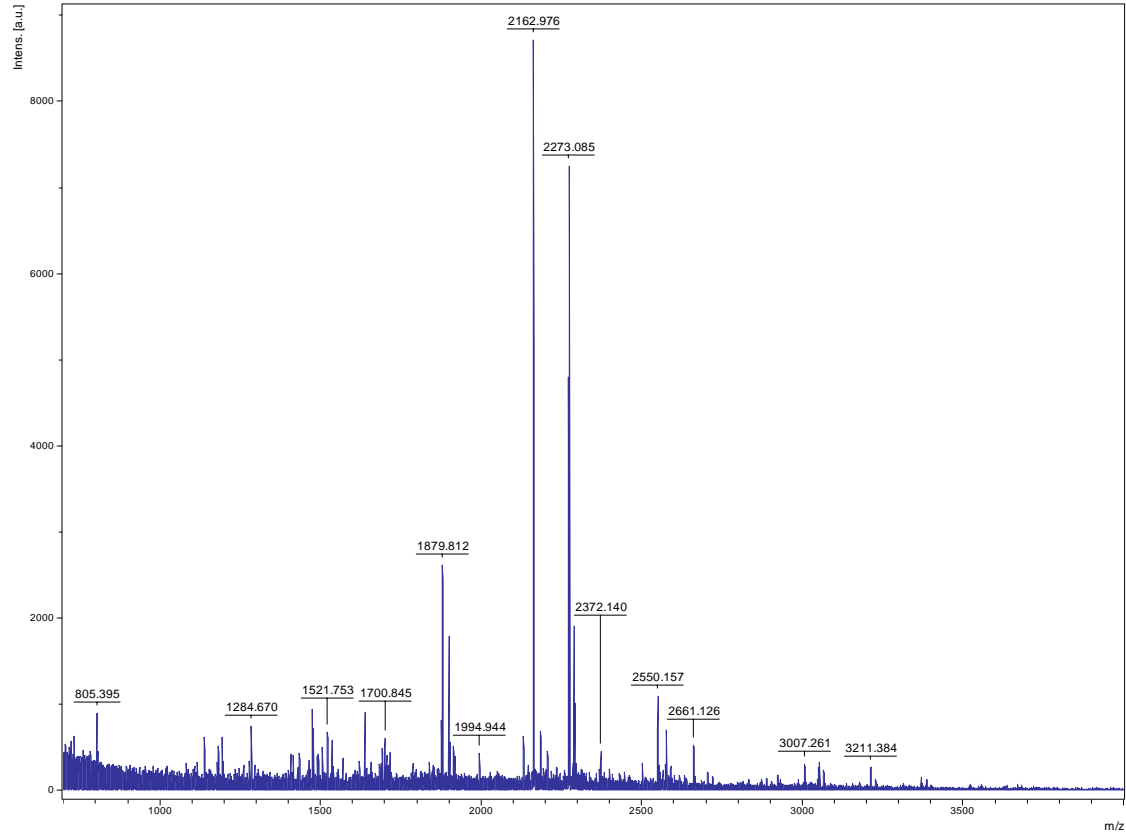

Match to: gi|77549143; Score: 85

### Matched peptides:

| Start - End | Observed | Mr (expt) | Mr (calc) | Delta | Miss Sequence                                 |
|-------------|----------|-----------|-----------|-------|-----------------------------------------------|
| 112 - 121   | 1195.60  | 1194.60   | 1194.63   | -0.03 | 0 YEIQGFPTLK                                  |
| 214 - 224   | 1182.62  | 1181.61   | 1181.65   | -0.04 | 0 GDAAVRPLVR                                  |
| 225 - 237   | 1536.76  | 1535.76   | 1535.82   | -0.06 | 0 LFKPFDELVVDSK                               |
| 256 - 271   | 1899.93  | 1898.93   | 1898.99   | -0.06 | 1 VVTFDKNPDNHPYLLK                            |
| 296 - 308   | 1506.67  | 1505.67   | 1505.70   | -0.04 | 1 SVYYGAAEEFKDK                               |
| 312 - 330   | 2132.02  | 2131.02   | 2131.07   | -0.05 | 0 FLIGDIEASQGAFQYFGLR                         |
| 350 - 362   | 1521.75  | 1520.75   | 1520.80   | -0.05 | 0 AHVDPQIVSWLK                                |
| 404 - 418   | 1879.81  | 1878.81   | 1878.85   | -0.04 | 0 NVLVEFYAPWCGHCK                             |
| 442 - 469   | 3065.35  | 3064.35   | 3064.40   | -0.05 | 0 MDATEANDVPSEFDVQGYPTLYFVTPSGK Oxidation (M) |



### Spot 1613

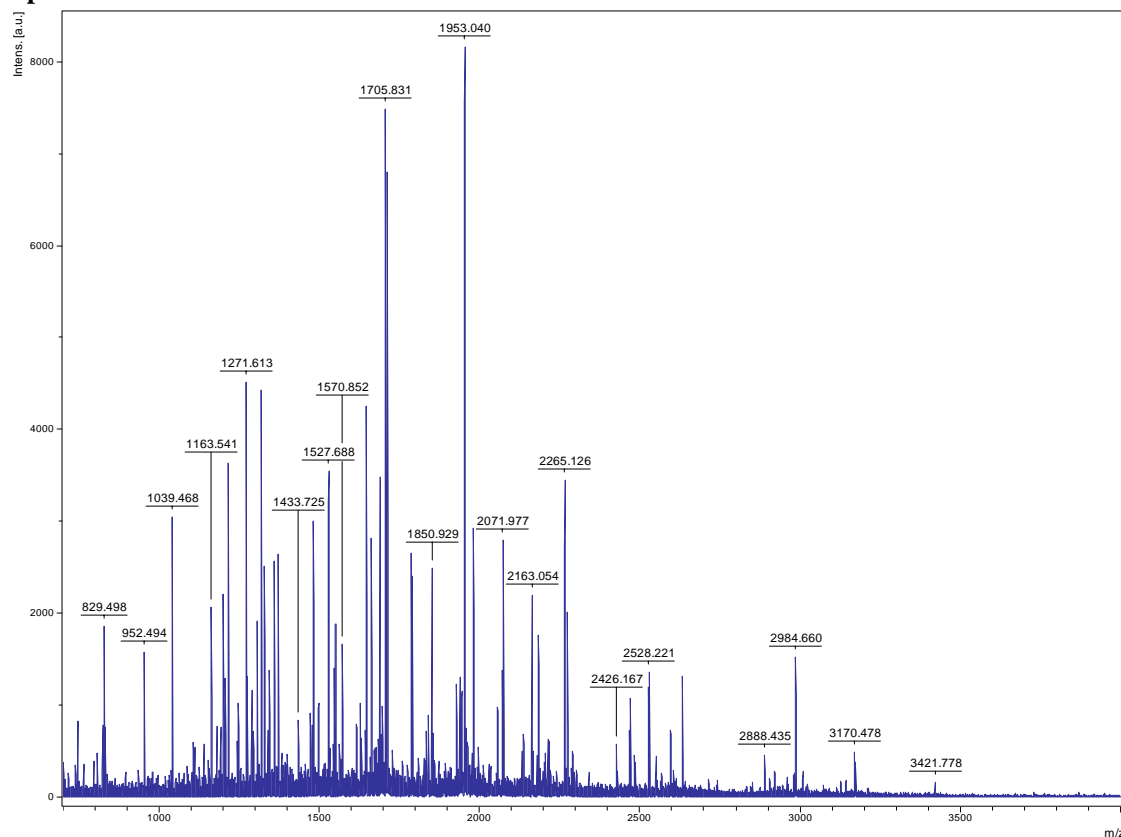

Match to: gi|75261364 Score: 161 Expect: 1.1e-11

#### Matched peptides:

| Start - End | Observed  | Mr (expt) | Mr (calc) | ppm | Miss Sequence                        |
|-------------|-----------|-----------|-----------|-----|--------------------------------------|
| 100 - 107   | 1039.4685 | 1038.4612 | 1038.4658 | -4  | 0 K.DVEFSEWK.G                       |
| 108 - 122   | 1570.8516 | 1569.8443 | 1569.8614 | -11 | 0 K.GDILAIIVTENDLVK.G                |
| 123 - 134   | 1294.6443 | 1293.6371 | 1293.6565 | -15 | 1 K.GSDSKFENAVLK.K                   |
| 135 - 156   | 2265.1260 | 2264.1187 | 2264.1172 | 1   | 1 K.KLDGQLGGLLSEASAEEDFTGK.A         |
| 136 - 156   | 2137.0261 | 2136.0188 | 2136.0222 | -2  | 0 K.KLDGQLGGLLSEASAEEDFTGK.A         |
| 157 - 164   | 829.4979  | 828.4906  | 828.4818  | 11  | 0 K.AGQSVVLR.L                       |
| 173 - 190   | 1787.9185 | 1786.9112 | 1786.9247 | -8  | 0 R.VGLIGLQGNAPSTTTACK.G             |
| 202 - 223   | 2183.0921 | 2182.0848 | 2182.0906 | -3  | 0 K.SAQASSAAIVFASVGGIQEDFKL          |
| 224 - 243   | 1953.0398 | 1952.0325 | 1952.0327 | -0  | 0 K.LTAAAIASGTVLGLHEDSR.Y            |
| 255 - 270   | 1688.8346 | 1687.8273 | 1687.8417 | -9  | 0 K.QVDLIGFSGPEVDQK.L                |
| 273 - 285   | 1370.6841 | 1369.6768 | 1369.6878 | -8  | 0 K.YANDLSSGVIFGK.E                  |
| 368 - 379   | 1271.6135 | 1270.6062 | 1270.6194 | -10 | 0 K.GLTFDSGGYNIK.T                   |
| 380 - 390   | 1192.5774 | 1191.5701 | 1191.5628 | 6   | 0 K.TGPGCSIELMK.F                    |
| 380 - 390   | 1208.5572 | 1207.5499 | 1207.5577 | -6  | 0 K.TGPGCSIELMK.F Oxidation (M)      |
| 391 - 404   | 1328.6227 | 1327.6155 | 1327.6231 | -6  | 0 K.FDMGGSAAVFGAAK.A                 |
| 391 - 404   | 1344.6078 | 1343.6005 | 1343.6180 | -13 | 0 K.FDMGGSAAVFGAAK.A Oxidation (M)   |
| 445 - 456   | 1318.6133 | 1317.6060 | 1317.6161 | -8  | 0 K.TIEVNTDAEGR.L                    |
| 457 - 473   | 1850.9287 | 1849.9214 | 1849.9244 | -2  | 0 R.LTLADALVYACNQGVDK.I              |
| 505 - 516   | 1190.6029 | 1189.5957 | 1189.5826 | 11  | 0 K.EVAAASEISGEK.F                   |
| 520 - 531   | 1529.6660 | 1528.6587 | 1528.6578 | 1   | 0 R.MPLEESYWESMK.S                   |
| 520 - 531   | 1545.6619 | 1544.6546 | 1544.6527 | 1   | 0 R.MPLEESYWESMK.S Oxidation (M)     |
| 532 - 543   | 1163.5411 | 1162.5338 | 1162.5401 | -5  | 0 K.SGVADMVNTGGR.Q                   |
| 544 - 555   | 1205.6722 | 1204.6649 | 1204.6816 | -14 | 0 R.QGGSIITAAFLFK.Q                  |
| 562 - 577   | 1926.8937 | 1925.8865 | 1925.8917 | -3  | 0 K.VQWMHIDMAGPVWNDK.K               |
| 562 - 577   | 1942.9452 | 1941.9380 | 1941.8866 | 26  | 0 K.VQWMHIDMAGPVWNDK.K Oxidation (M) |

Match to: gi|13560275 Score: 137 Expect: 2.7e-09

#### Matched peptides:

| Start - End | Observed  | Mr (expt) | Mr (calc) | ppm | Miss Sequence                                 |
|-------------|-----------|-----------|-----------|-----|-----------------------------------------------|
| 46 - 74     | 3170.4781 | 3169.4708 | 3169.3843 | 27  | 0 R.LPVTHVGDDELHSHGWNACSSCHGDPSASR.R          |
| 76 - 86     | 1215.7386 | 1214.7314 | 1214.7387 | -6  | 0 R.FLILPSLLSGR.V                             |
| 87 - 97     | 1304.6996 | 1303.6924 | 1303.7136 | -16 | 1 R.VYVVDTLKDPR.A                             |
| 160 - 178   | 2426.1673 | 2425.1600 | 2425.1280 | 13  | 0 R.WEKPGLSPLFGYDYWYQPR.H                     |
| 181 - 194   | 1481.7150 | 1480.7077 | 1480.7133 | -4  | 0 K.TMISSSWGAPAAFR.T                          |
| 181 - 194   | 1497.7209 | 1496.7137 | 1496.7082 | 4   | 0 K.TMISSSWGAPAAFR.T Oxidation (M)            |
| 195 - 209   | 1705.8308 | 1704.8235 | 1704.8220 | 1   | 0 R.TGFDLQHVQDGLYGR.H                         |
| 210 - 222   | 1550.7713 | 1549.7640 | 1549.7678 | -2  | 0 R.HLHVYDWPGGELK.Q                           |
| 223 - 238   | 1694.9110 | 1693.9038 | 1693.9251 | -13 | 0 K.QTLDLGSLGPLEVR.F Gln->pyro-Glu (N-term Q) |
| 223 - 238   | 1711.9627 | 1710.9554 | 1710.9516 | 2   | 0 K.QTLDLGSLGPLEVR.F                          |
| 239 - 260   | 2468.2111 | 2467.2039 | 2467.1624 | 17  | 1 R.FLHDPKSDTGYVGCALTSNMVR.F                  |
| 239 - 260   | 2484.1878 | 2483.1806 | 2483.1573 | 9   | 1 R.FLHDPKSDTGYVGCALTSNMVR.F Oxidation (M)    |
| 246 - 260   | 1643.7819 | 1642.7747 | 1642.7443 | 18  | 0 K.DTGYVGCALTSNMVR.F                         |
| 264 - 281   | 1939.0206 | 1938.0134 | 1938.0211 | -4  | 0 K.TADGQSWSHVIAISIKPLK.V                     |
| 305 - 317   | 1661.8540 | 1660.8467 | 1660.8725 | -16 | 0 R.YLYLVNWLHGDIR.Q                           |
| 318 - 341   | 2595.4144 | 2594.4072 | 2594.3857 | 8   | 0 R.QYNIEDPAKPVLAGQVWAGLLQK.G                 |
| 342 - 363   | 2528.2214 | 2527.2141 | 2527.1966 | 7   | 1 K.GSEVVYVTEDDKEEQYSVPQVK.G                  |
| 369 - 381   | 1343.6550 | 1342.6477 | 1342.6915 | -33 | 0 R.GGPMIQLSLDGKR                             |
| 383 - 392   | 1199.6332 | 1198.6259 | 1198.6346 | -7  | 0 R.IYVNTSLFSR.W                              |
| 393 - 404   | 1527.6878 | 1526.6805 | 1526.7042 | -15 | 0 R.WDEQFYGGDLVK.K                            |
| 419 - 445   | 2888.4349 | 2887.4276 | 2887.3599 | 23  | 0 K.GGLSINPNFVDFGAEPGSLAHEMR.Y                |

## Spot 1616

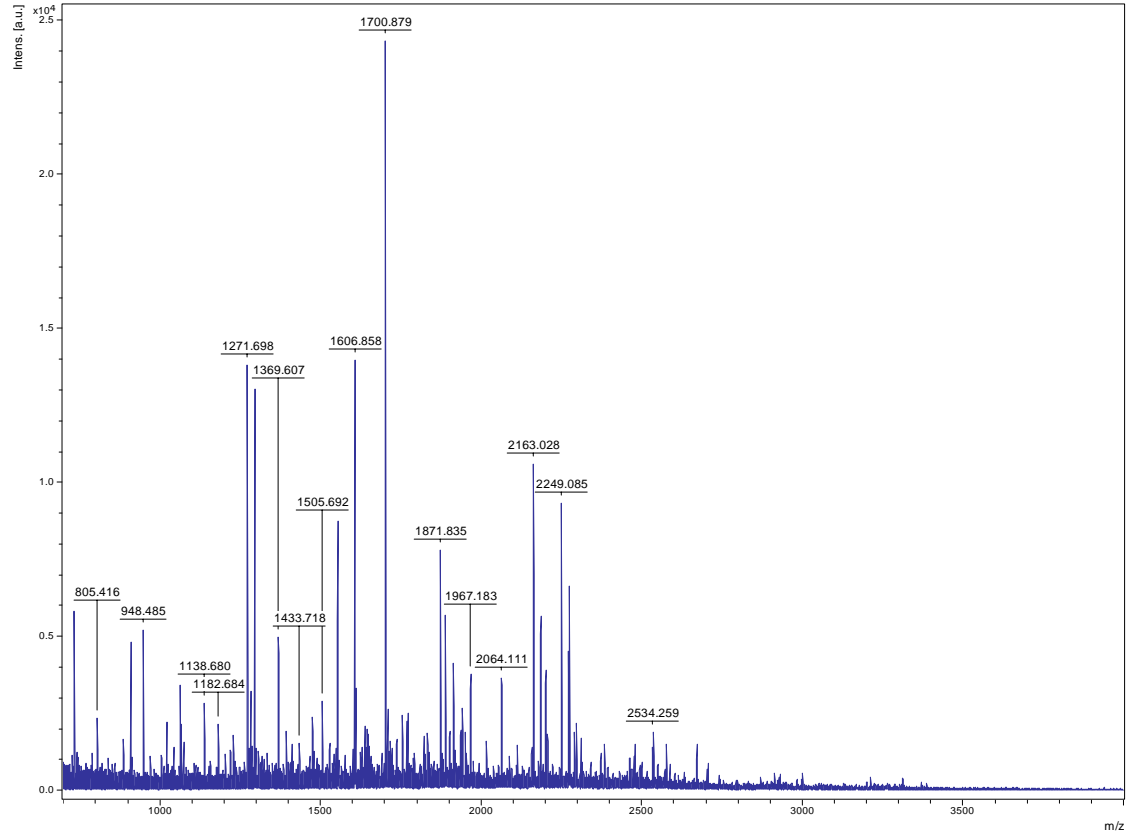

Match to: gi|51963782; Score: 130

### Matched peptides:

| Start - End | Observed | Mr (expt) | Mr (calc) | Delta | Miss Sequence                           |
|-------------|----------|-----------|-----------|-------|-----------------------------------------|
| 55 - 66     | 1410.74  | 1409.73   | 1409.76   | -0.02 | 1 ELYFNKDGLAIK                          |
| 75 - 86     | 1182.68  | 1181.68   | 1181.70   | -0.02 | 0 LADLVGVTLPK                           |
| 158 - 170   | 1295.72  | 1294.72   | 1294.74   | -0.02 | 0 VVAAGANPVQITR                         |
| 233 - 248   | 1871.83  | 1870.83   | 1870.85   | -0.02 | 0 SAENNLVYVVEGMQFDR                     |
| 233 - 248   | 1887.83  | 1886.83   | 1886.85   | -0.02 | 0 SAENNLVYVVEGMQFDR Oxidation (M)       |
| 249 - 261   | 1505.69  | 1504.69   | 1504.71   | -0.02 | 0 GYISPYFVTDEK                          |
| 283 - 293   | 1271.70  | 1270.70   | 1270.71   | -0.02 | 0 DLITILEDAIR                           |
| 336 - 353   | 1951.03  | 1950.03   | 1950.04   | -0.01 | 1 KSQYLLDIATLTGGTVIR                    |
| 337 - 353   | 1822.93  | 1821.93   | 1821.95   | -0.02 | 0 SQYLLDIATLTGGTVIR                     |
| 379 - 396   | 1935.94  | 1934.94   | 1934.92   | 0.02  | 1 DSTITVGDGTTQDEVNKR                    |
| 402 - 413   | 1479.73  | 1478.72   | 1478.69   | 0.03  | 0 NQIEVAEQEYK                           |
| 402 - 415   | 1736.83  | 1735.83   | 1735.83   | 0.00  | 1 NQIEVAEQEYKEK                         |
| 423 - 441   | 1899.96  | 1898.96   | 1899.03   | -0.07 | 0 LSGGVAVIQVGAQTETELK                   |
| 423 - 443   | 2157.15  | 2156.15   | 2156.17   | -0.02 | 1 LSGGVAVIQVGAQTETELKEK                 |
| 445 - 455   | 1229.67  | 1228.67   | 1228.68   | -0.01 | 1 LRVEDALNATK                           |
| 456 - 472   | 1700.88  | 1699.88   | 1699.89   | -0.02 | 0 AAVEEGIVVGGGCTLLR                     |
| 473 - 490   | 2016.01  | 2015.01   | 2015.04   | -0.03 | 1 LASKVDAIITLENDEQK                     |
| 522 - 529   | 948.48   | 947.48    | 947.48    | 0.00  | 0 VLANDNFR                              |
| 530 - 552   | 2478.18  | 2477.18   | 2477.18   | -0.00 | 1 YGYNAATGKYEDLMAAGIIDPTK Oxidation (M) |
| 539 - 555   | 1890.97  | 1889.97   | 1889.99   | -0.02 | 1 YEDLMAAGIIDPTKVVR                     |

## Spot 1619

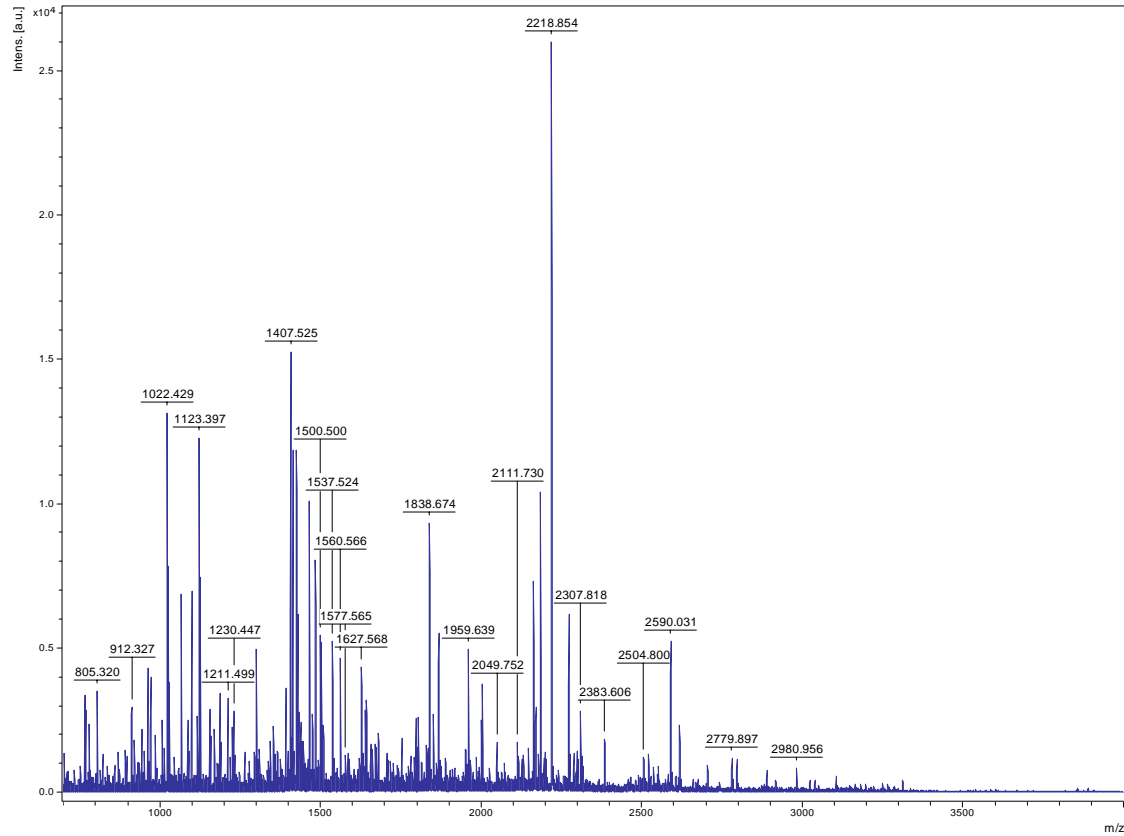

Match to: Q338N8\_ORYSA Score: 79 Expect: 0.0009

### Matched peptides:

| Start - End | Observed  | Mr (expt) | Mr (calc) | Delta   | Miss Sequence                                  |
|-------------|-----------|-----------|-----------|---------|------------------------------------------------|
| 15 - 23     | 1066.4169 | 1065.4096 | 1065.5277 | -0.1180 | 0 K.VLNCEYAVR.G                                |
| 15 - 23     | 1123.4404 | 1122.4331 | 1122.5491 | -0.1160 | 0 K.VLNCEYAVR.G Carbamidomethyl (C)            |
| 24 - 32     | 1022.4370 | 1021.4297 | 1021.5668 | -0.1371 | 0 R.GEIVIAQR.L                                 |
| 70 - 87     | 2183.7712 | 2182.7639 | 2183.0602 | -0.2963 | 1 R.EVIALCDHPCLLEKEETK.S 2 Carbamidomethyl (C) |
| 98 - 108    | 1099.5075 | 1098.5002 | 1098.6397 | -0.1395 | 0 R.ATTILASIPGR.A                              |
| 124 - 133   | 944.3999  | 943.3926  | 943.5087  | -0.1161 | 0 R.DAIAAGIASR.D                               |
| 282 - 300   | 2131.7347 | 2130.7274 | 2130.9779 | -0.2505 | 0 R.SMGYNEDDLPLVSFQSVSK.G Oxidation (M)        |
| 301 - 309   | 1089.3541 | 1088.3468 | 1088.4709 | -0.1240 | 1 K.GYYGECGKR.G Carbamidomethyl (C)            |
| 309 - 323   | 1640.6230 | 1639.6157 | 1639.8140 | -0.1983 | 1 K.RGGYMEITGFSAPVR.E                          |
| 310 - 323   | 1484.5191 | 1483.5118 | 1483.7129 | -0.2011 | 0 R.GGYMEITGFSAPVR.E                           |
| 310 - 323   | 1500.5371 | 1499.5298 | 1499.7078 | -0.1780 | 0 R.GGYMEITGFSAPVR.E Oxidation (M)             |
| 363 - 374   | 1300.5450 | 1299.5377 | 1299.7146 | -0.1769 | 1 K.AEKDGILQSLAR.R                             |
| 410 - 419   | 972.4243  | 971.4170  | 971.5399  | -0.1230 | 1 K.AIDAAKAANK.A                               |
| 416 - 428   | 1407.5557 | 1406.5484 | 1406.7306 | -0.1822 | 1 K.AANKAPDAFYALRL.L                           |
| 420 - 428   | 1023.3955 | 1022.3882 | 1022.5185 | -0.1303 | 0 K.APDAFYALR.L                                |
| 454 - 469   | 1867.7608 | 1866.7535 | 1867.0237 | -0.2702 | 1 R.CTILPQEEKIPAIISR.F Carbamidomethyl (C)     |
| 463 - 469   | 769.4082  | 768.4010  | 768.4857  | -0.0848 | 0 K.IPAISR.F                                   |
| 472 - 483   | 1414.4279 | 1413.4206 | 1413.6135 | -0.1929 | 1 K.AFHEGFMAAYRD.-                             |
| 472 - 483   | 1430.4553 | 1429.4480 | 1429.6084 | -0.1604 | 1 K.AFHEGFMAAYRD.- Oxidation (M)               |

## Spot 1626

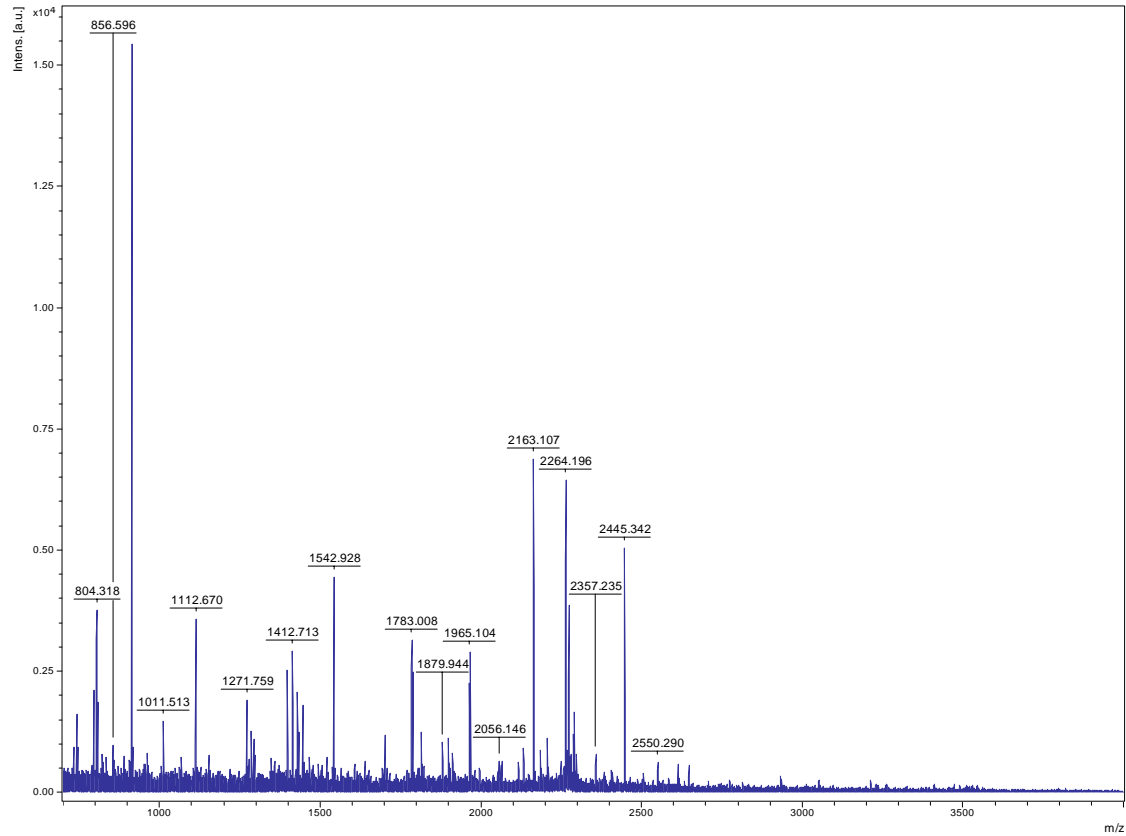

Match to: gi|49388150; Score: 142

### Matched peptides:

| Start - End | Observed | Mr (expt) | Mr (calc) | Delta | Miss Sequence                      |
|-------------|----------|-----------|-----------|-------|------------------------------------|
| 11 - 32     | 2445.34  | 2444.34   | 2444.26   | 0.08  | 0 SFVEVAPGSHFPIQNLPFGVFR           |
| 77 - 92     | 1911.10  | 1910.09   | 1909.92   | 0.18  | 0 QETLNMFLGMGRPAWK 2 Oxidation (M) |
| 101 - 110   | 1112.67  | 1111.67   | 1111.62   | 0.04  | 0 ILSADEPVLR                       |
| 101 - 116   | 1783.01  | 1782.01   | 1781.95   | 0.05  | 1 ILSADEPVLRDNEALK                 |
| 156 - 175   | 2264.20  | 2263.19   | 2263.13   | 0.06  | 0 GPQTPVNPWFQLPVGYHGR              |
| 176 - 190   | 1542.93  | 1541.93   | 1541.88   | 0.05  | 0 ASSVIVSGTDIIRPK                  |
| 191 - 207   | 1787.90  | 1786.90   | 1786.84   | 0.06  | 0 GQGHPTGDSRPYFGPSK                |
| 251 - 266   | 1784.99  | 1783.99   | 1783.95   | 0.04  | 0 DIQAWETPLGPFLGK                  |
| 292 - 303   | 1396.71  | 1395.71   | 1395.69   | 0.02  | 0 QEPEPLPYLAEK Pyro-glu (N-term Q) |
| 304 - 319   | 1965.10  | 1964.10   | 1964.05   | 0.05  | 0 NHVNYDIPLEVWIKPK                 |
| 385 - 393   | 962.55   | 961.55    | 961.48    | 0.07  | 0 EISVGNSTR                        |
| 394 - 409   | 1897.95  | 1896.95   | 1896.90   | 0.05  | 1 KFLEDGDEVILTACCK                 |
| 410 - 423   | 1446.68  | 1445.67   | 1445.62   | 0.05  | 0 GEGYNVGFGTCTGK                   |

# Spot 1628

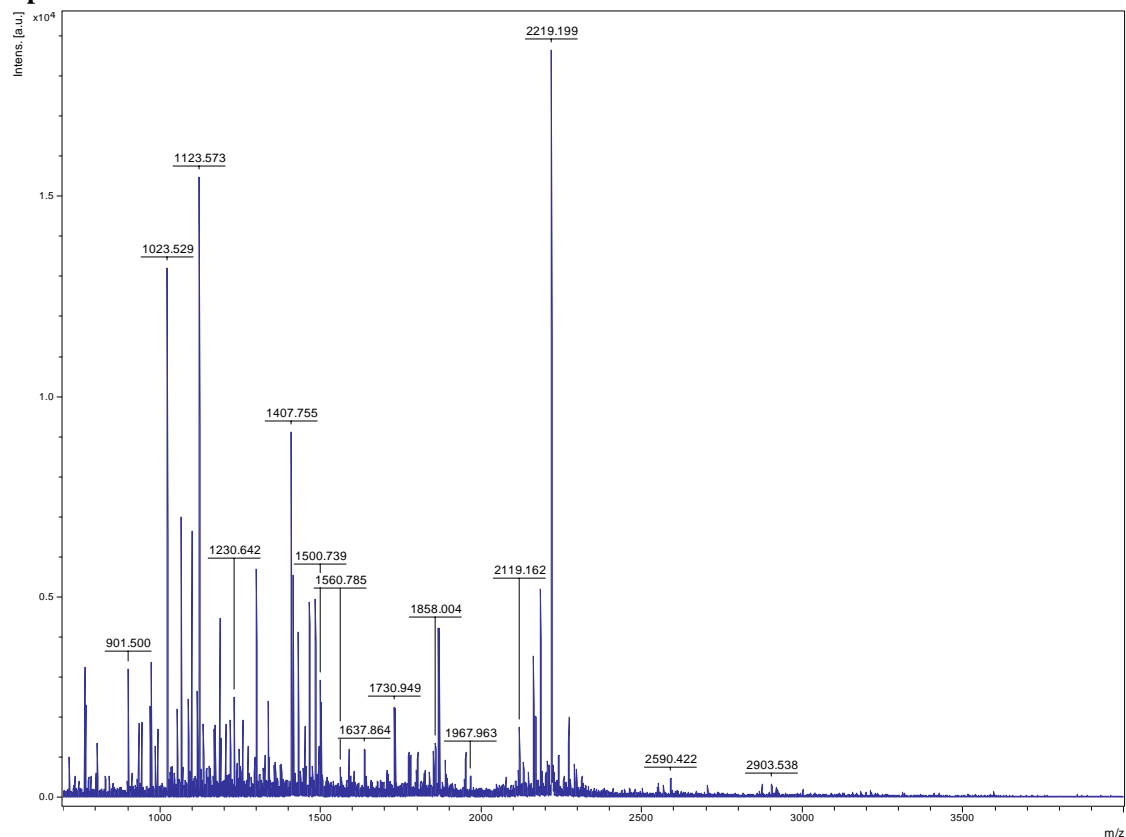

Match to: gi|78708519 Score: 89 Expect: 8.4e-05

## Matched peptides:

| Start - End | Observed  | Mr (expt) | Mr (calc) | Delta   | Miss Sequence                              |
|-------------|-----------|-----------|-----------|---------|--------------------------------------------|
| 2 - 14      | 1295.4161 | 1294.4088 | 1294.6881 | -0.2792 | 0 M.AAPSVAVDNLNPK.V                        |
| 15 - 23     | 1066.4247 | 1065.4174 | 1065.5277 | -0.1102 | 0 K.VLNCEYAVR.G                            |
| 15 - 23     | 1123.4091 | 1122.4018 | 1122.5491 | -0.1473 | 0 K.VLNCEYAVR.G Carbamidomethyl (C)        |
| 24 - 32     | 1022.4422 | 1021.4349 | 1021.5668 | -0.1319 | 0 R.GEIVIIHAQRL                            |
| 70 - 83     | 1696.7585 | 1695.7512 | 1695.8324 | -0.0812 | 0 R.EVIALCDHPCLLEKE.2 Carbamidomethyl (C)  |
| 98 - 108    | 1099.5044 | 1098.4971 | 1098.6397 | -0.1426 | 0 R.ATTILASIPGRA                           |
| 109 - 120   | 1219.4282 | 1218.4209 | 1218.5993 | -0.1783 | 0 R.ATGAYSHSQGIK.G                         |
| 124 - 133   | 944.4407  | 943.4334  | 943.5087  | -0.0752 | 0 R.DAIAAGIASR.D                           |
| 210 - 215   | 747.4429  | 746.4356  | 746.3559  | 0.0797  | 0 K.QLEDSR.L                               |
| 210 - 217   | 971.3037  | 970.2965  | 970.5083  | -0.2119 | 1 K.QLEDSRLK.G Gln->pyro-Glu (N-term Q)    |
| 216 - 222   | 800.5216  | 799.5144  | 799.4915  | 0.0228  | 1 R.LKGDVLR.A                              |
| 282 - 300   | 2116.2325 | 2115.2252 | 2114.9830 | 0.2423  | 0 R.SMGYNEDDLPLVFSQSVSK.G                  |
| 282 - 300   | 2132.2669 | 2131.2596 | 2130.9779 | 0.2817  | 0 R.SMGYNEDDLPLVFSQSVSK.G Oxidation (M)    |
| 301 - 308   | 933.3170  | 932.3098  | 932.3698  | -0.0600 | 0 K.GYYGECGK.R Carbamidomethyl (C)         |
| 301 - 309   | 1089.3464 | 1088.3391 | 1088.4709 | -0.1317 | 1 K.GYYGECGK.R Carbamidomethyl (C)         |
| 309 - 323   | 1640.7048 | 1639.6975 | 1639.8140 | -0.1165 | 1 K.RGGYMEITGFSAPVR.E                      |
| 310 - 323   | 1484.5548 | 1483.5475 | 1483.7129 | -0.1654 | 0 R.GGYMEITGFSAPVR.E                       |
| 310 - 323   | 1500.5468 | 1499.5395 | 1499.7078 | -0.1683 | 0 R.GGYMEITGFSAPVR.E Oxidation (M)         |
| 310 - 328   | 2146.3540 | 2145.3467 | 2145.0564 | 0.2903  | 1 R.GGYMEITGFSAPVRQIYK.V                   |
| 363 - 374   | 1300.5390 | 1299.5317 | 1299.7146 | -0.1829 | 1 K.AEKDGILQSLAR.R                         |
| 378 - 393   | 1780.7956 | 1779.7883 | 1779.8461 | -0.0578 | 0 K.ALENAFNSLEGITCNK.T Carbamidomethyl (C) |
| 394 - 409   | 1822.9359 | 1821.9286 | 1821.9335 | -0.0048 | 0 K.TEGAMYLFPQLSLPQK.A                     |
| 394 - 409   | 1838.9176 | 1837.9103 | 1837.9284 | -0.0181 | 0 K.TEGAMYLFPQLSLPQK.A Oxidation (M)       |
| 410 - 419   | 972.4347  | 971.4274  | 971.5399  | -0.1126 | 1 K.AIDAAKAANK.A                           |
| 416 - 428   | 1407.5517 | 1406.5444 | 1406.7306 | -0.1862 | 1 K.AANKAPDAFYALRL.L                       |
| 420 - 428   | 1023.4077 | 1022.4004 | 1022.5185 | -0.1181 | 0 K.APDAFYALR.L                            |
| 454 - 469   | 1868.0548 | 1867.0475 | 1867.0237 | 0.0238  | 1 R.CTILPQEEKIPAIISR.F Carbamidomethyl (C) |
| 463 - 469   | 769.5429  | 768.5356  | 768.4857  | 0.0499  | 0 K.IPAISR.F                               |
| 463 - 471   | 1044.4044 | 1043.3971 | 1043.6491 | -0.2520 | 1 K.IPAISR.FK.A                            |
| 472 - 483   | 1414.4495 | 1413.4422 | 1413.6135 | -0.1713 | 1 K.AFHEGFMAAYRD.-                         |
| 472 - 483   | 1430.4442 | 1429.4369 | 1429.6084 | -0.1715 | 1 K.AFHEGFMAAYRD.- Oxidation (M)           |

## Spot 1635

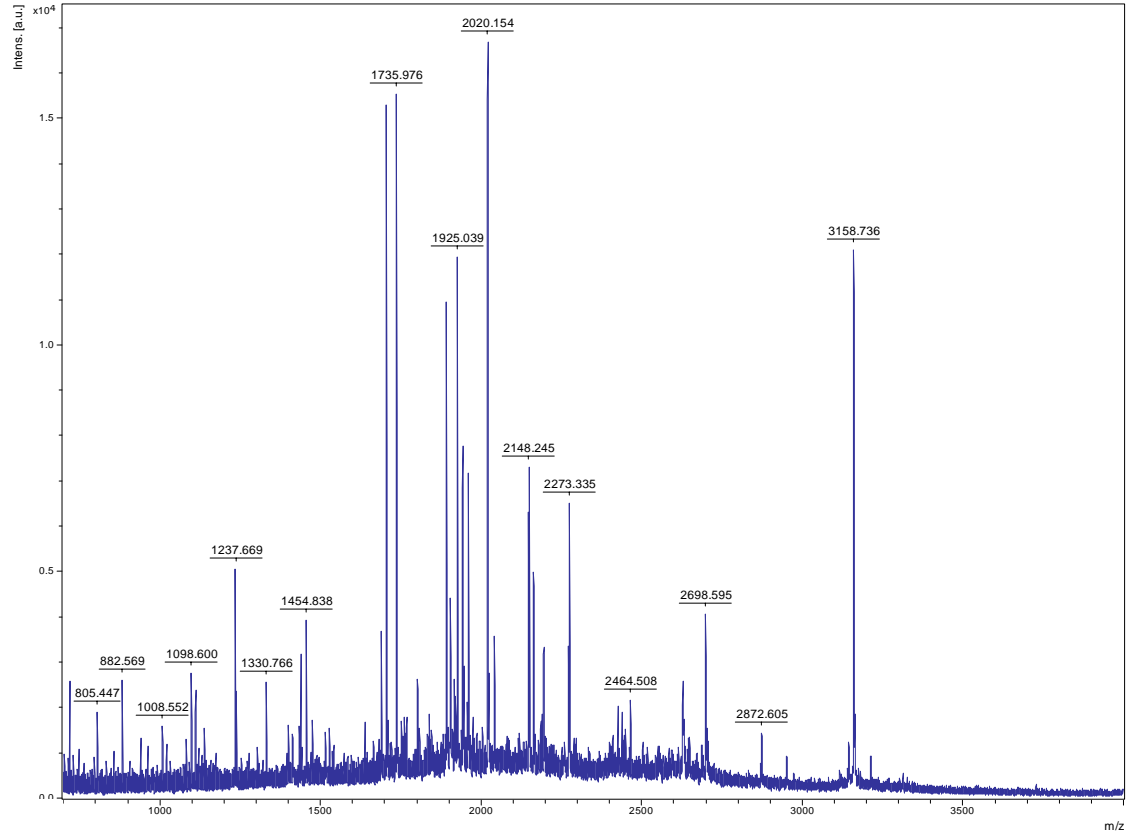

Match to: gi|50908803 Score: 75 Expect: 0.0022

### Matched peptides:

| Start - End | Observed  | Mr (expt) | Mr (calc) | Delta  | Miss Sequence                                                     |
|-------------|-----------|-----------|-----------|--------|-------------------------------------------------------------------|
| 18 - 27     | 1138.6327 | 1137.6254 | 1137.5891 | 0.0364 | 0 K.QRPPAAIDR.D                                                   |
| 18 - 41     | 2704.3921 | 2703.3848 | 2703.2194 | 0.1654 | 1 K.QRPPAAIDRDMSSSEVVDSNPYSR.L Oxidation (M); Pyro-glu (N-term Q) |
| 48 - 56     | 1096.5413 | 1095.5340 | 1095.5018 | 0.0321 | 0 R.MGIVDNYER.I                                                   |
| 57 - 80     | 2464.5083 | 2463.5010 | 2463.3154 | 0.1856 | 1 R.IRDYSIAIVGIGGVGSVAEMLTR.C Oxidation (M)                       |
| 59 - 80     | 2195.3379 | 2194.3306 | 2194.1303 | 0.2004 | 0 R.DYSIAIVGIGGVGSVAEMLTR.C Oxidation (M)                         |
| 86 - 101    | 1943.0924 | 1942.0851 | 1941.9506 | 0.1346 | 0 R.LLLYDYDTVELANMNR.L                                            |
| 86 - 101    | 1959.1100 | 1958.1027 | 1957.9455 | 0.1572 | 0 R.LLLYDYDTVELANMNR.L Oxidation (M)                              |
| 102 - 113   | 1438.8102 | 1437.8029 | 1437.7438 | 0.0591 | 0 R.LFFRPDQVGMTR.T                                                |
| 102 - 113   | 1454.8378 | 1453.8305 | 1453.7387 | 0.0918 | 0 R.LFFRPDQVGMTR.T Oxidation (M)                                  |
| 142 - 151   | 1098.6005 | 1097.5932 | 1097.5757 | 0.0175 | 0 K.GFETFLGSLK.A                                                  |
| 159 - 175   | 1925.0391 | 1924.0318 | 1923.8996 | 0.1322 | 0 R.NTGVDLVLSVDNYEAR.M Carbamidomethyl (C)                        |
| 365 - 393   | 3158.7356 | 3157.7283 | 3157.4938 | 0.2345 | 0 R.ELPTADSYQEPVAPVTSGAIDDDLEELQR.Q                               |

### Spot 1643

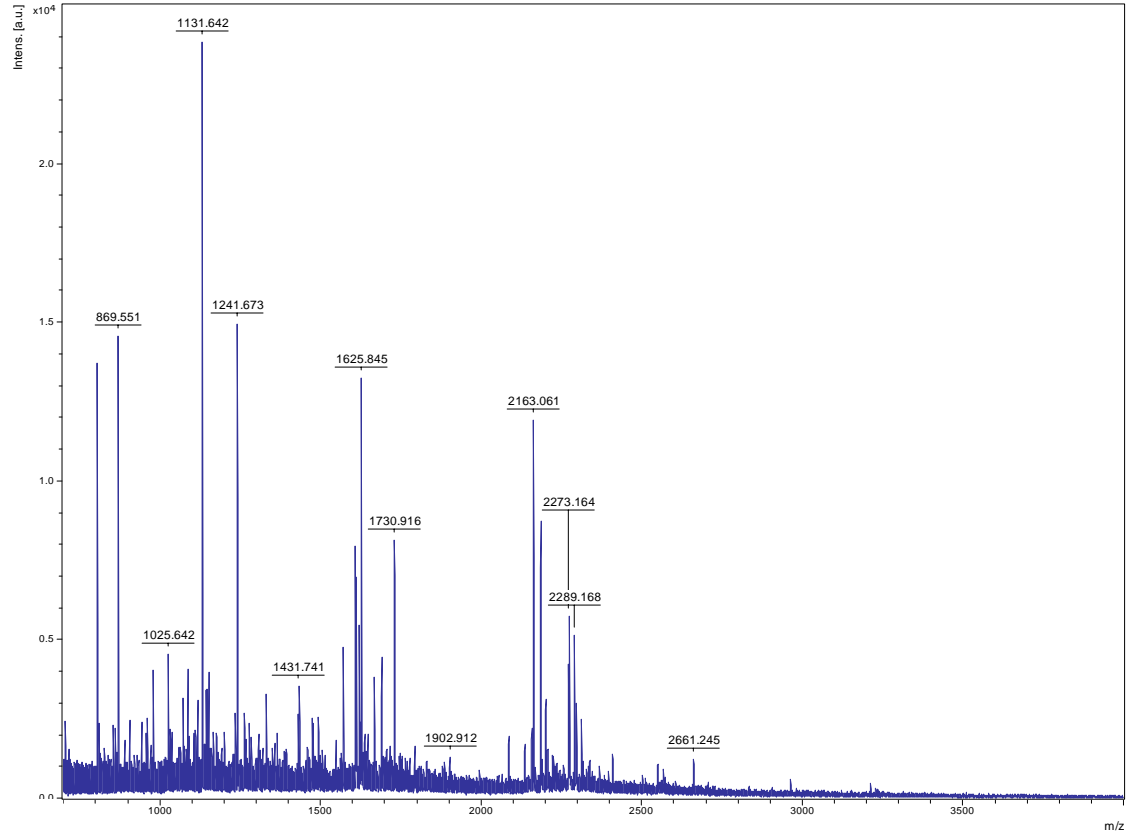

Match to: gi|55773816; Score: 97

Matched peptides:

| Start - End | Observed | Mr (expt) | Mr (calc) | Delta | Miss Sequence             |
|-------------|----------|-----------|-----------|-------|---------------------------|
| 94 - 103    | 961.44   | 960.44    | 960.42    | 0.02  | 0 GANQAACGGR              |
| 104 - 114   | 1131.64  | 1130.64   | 1130.64   | -0.01 | 0 LAAGPTYLVAR             |
| 123 - 135   | 1241.67  | 1240.67   | 1240.68   | -0.01 | 0 LLEGALADAGGVR           |
| 123 - 138   | 1625.84  | 1624.84   | 1624.89   | -0.05 | 1 LLEGALADAGGRLDR         |
| 187 - 195   | 1025.64  | 1024.64   | 1024.65   | -0.01 | 1 RAGVLLLR                |
| 188 - 195   | 869.55   | 868.55    | 868.55    | -0.00 | 0 AGVLLLR                 |
| 196 - 210   | 1667.87  | 1666.87   | 1666.87   | 0.00  | 0 EIPDWNVQVAQAAK          |
| 248 - 261   | 1609.78  | 1608.78   | 1608.78   | -0.00 | 0 LTGMPTEFTEQISR          |
| 278 - 294   | 1730.92  | 1729.91   | 1729.90   | 0.01  | 0 LGSQGSALFIEGGEPIR       |
| 346 - 355   | 1071.56  | 1070.56   | 1070.55   | 0.00  | 1 GAIPSPDRK               |
| 346 - 355   | 1087.56  | 1086.56   | 1086.55   | 0.01  | 1 GAIPSPDRK Oxidation (M) |

# Spot 1649

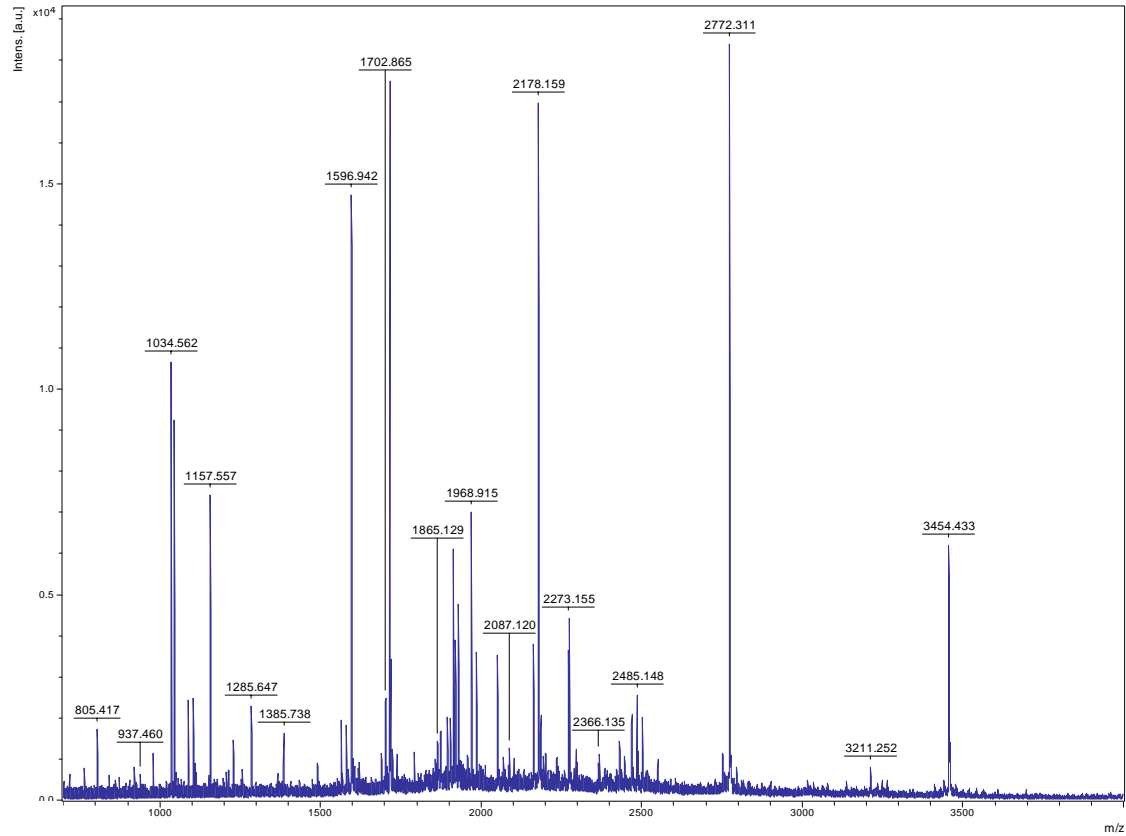

Match to: gi|14150751 Score: 202 Expect: 4.2e-16

## Matched peptides:

| Start - End | Observed  | Mr (expt) | Mr (calc) | Delta   | Miss Sequence                                  |
|-------------|-----------|-----------|-----------|---------|------------------------------------------------|
| 6 - 23      | 1968.9437 | 1967.9364 | 1967.8782 | 0.0583  | 0 K.DGAADLEEGTLEIGMEYR.T                       |
| 43 - 50     | 1034.6044 | 1033.5971 | 1033.5556 | 0.0415  | 0 K.YQEIVNIR.L                                 |
| 58 - 68     | 1229.7005 | 1228.6932 | 1228.6411 | 0.0521  | 1 R.RGQVLEVDGEK.A                              |
| 69 - 83     | 1563.8855 | 1562.8782 | 1562.7940 | 0.0843  | 0 K.AVVQVFEGTSGIDNK.Y                          |
| 84 - 95     | 1385.7938 | 1384.7865 | 1384.7238 | 0.0627  | 0 K.YTTVQFTGEVLK.T                             |
| 96 - 105    | 1088.6232 | 1087.6159 | 1087.5695 | 0.0464  | 0 K.TPVSLDMLGR.I                               |
| 96 - 105    | 1104.6193 | 1103.6120 | 1103.5645 | 0.0476  | 0 K.TPVSLDMLGR.I Oxidation (M)                 |
| 106 - 138   | 3454.4399 | 3453.4326 | 3453.7415 | -0.3089 | 0 R.IFNGSGKPIDNGPPLPEAYLDISGSSINPSE.R.T        |
| 139 - 160   | 2469.1626 | 2468.1553 | 2468.1927 | -0.0373 | 0 R.TYPEEMIQTGISTIDVMNSIAR.G                   |
| 139 - 160   | 2485.1345 | 2484.1272 | 2484.1876 | -0.0604 | 0 R.TYPEEMIQTGISTIDVMNSIAR.G Oxidation (M)     |
| 164 - 183   | 2178.1721 | 2177.1648 | 2177.1415 | 0.0233  | 0 K.IPLFSAAGLPHNEIAAQICR.Q Carbamidomethyl (C) |
| 235 - 249   | 1716.0109 | 1715.0036 | 1714.9253 | 0.0783  | 0 R.VTLFLNLANPTIER.I                           |
| 255 - 269   | 1702.9095 | 1701.9022 | 1701.8283 | 0.0739  | 0 R.IALTTAEYLA YECGK.H Carbamidomethyl (C)     |
| 270 - 286   | 1904.0197 | 1903.0124 | 1902.9873 | 0.0251  | 0 K.HVLVILTDMSSYADALR.E                        |
| 270 - 286   | 1920.0411 | 1919.0338 | 1918.9822 | 0.0516  | 0 K.HVLVILTDMSSYADALR.E Oxidation (M)          |
| 300 - 315   | 1912.9299 | 1911.9226 | 1911.8712 | 0.0514  | 0 R.GYPGYMYTDLATIYER.A                         |
| 300 - 315   | 1928.9315 | 1927.9242 | 1927.8662 | 0.0581  | 0 R.GYPGYMYTDLATIYER.A Oxidation (M)           |
| 365 - 378   | 1579.9498 | 1578.9425 | 1578.8770 | 0.0656  | 0 R.QIYPPINVLPSLSR.L Pyro-glu (N-term Q)       |
| 365 - 378   | 1596.9960 | 1595.9887 | 1595.9035 | 0.0852  | 0 R.QIYPPINVLPSLSR.L                           |
| 391 - 408   | 2051.0415 | 2050.0342 | 2049.9868 | 0.0475  | 1 R.RDHSQVSNQLYANYAIGK.D                       |
| 392 - 408   | 1894.9555 | 1893.9482 | 1893.8857 | 0.0626  | 0 R.DHSQVSNQLYANYAIGK.D                        |
| 415 - 438   | 2772.2803 | 2771.2730 | 2771.3904 | -0.1174 | 1 K.AVVGEEALSSDLLYLEFLDKFER.K                  |
| 439 - 449   | 1285.7188 | 1284.7115 | 1284.6462 | 0.0653  | 1 R.KFVTQGYDTR.N                               |



## Spot 1665

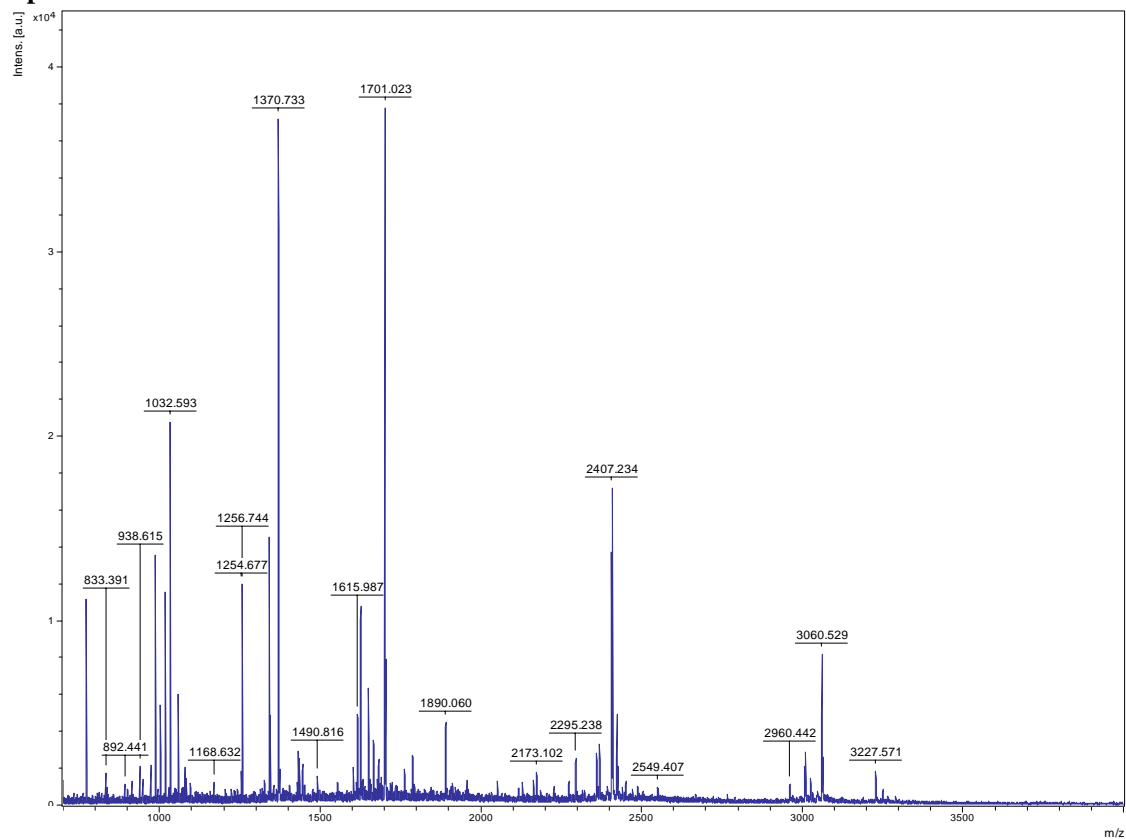

Match to: gi|50944557 Score: 113 Expect: 3.4e-07

### Matched peptides:

| Start - End | Observed  | Mr (expt) | Mr (calc) | Delta  | Miss Sequence                                                        |
|-------------|-----------|-----------|-----------|--------|----------------------------------------------------------------------|
| 70 - 81     | 1256.7437 | 1255.7364 | 1255.7036 | 0.0327 | 0 R.AKPAVPLGAN <del>Y</del> R.L                                      |
| 98 - 111    | 1625.9459 | 1624.9386 | 1624.8573 | 0.0814 | 0 K.IYVLTQFNSASLNR.H                                                 |
| 116 - 125   | 1056.5662 | 1055.5589 | 1055.5035 | 0.0553 | 0 R.AYGNIGGYK.N                                                      |
| 126 - 153   | 3060.5293 | 3059.5220 | 3059.4372 | 0.0848 | 0 K.NEGFVEVLAAQQSPDNPNWFQGTADAVR.Q                                   |
| 206 - 219   | 1553.8539 | 1552.8466 | 1552.7555 | 0.0911 | 1 R.ATAFGLMKIDE <del>E</del> GR.I Oxidation (M)                      |
| 220 - 233   | 1615.9867 | 1614.9794 | 1614.8980 | 0.0814 | 1 R.IVEFAEKPKGEQLK.A                                                 |
| 234 - 248   | 1649.9156 | 1648.9084 | 1648.8164 | 0.0920 | 0 K.AMMVDTTILGLDDV <del>R</del> .A                                   |
| 234 - 248   | 1665.9111 | 1664.9039 | 1664.8113 | 0.0925 | 0 K.AMMVDTTILGLDDV <del>R</del> .A Oxidation (M)                     |
| 266 - 273   | 986.6204  | 985.6131  | 985.5742  | 0.0389 | 0 K.NVMLQLLR.E                                                       |
| 266 - 273   | 1002.6187 | 1001.6114 | 1001.5692 | 0.0423 | 0 K.NVMLQLLR.E Oxidation (M)                                         |
| 274 - 296   | 2407.2339 | 2406.2266 | 2406.1273 | 0.0993 | 0 R.EQFPGANDFGSEVIPGATNIGMR.V                                        |
| 297 - 324   | 3227.5708 | 3226.5635 | 3226.5498 | 0.0137 | 0 R.VQAYLYDGYWEDIGTIEAFYNANLGITK.K                                   |
| 325 - 335   | 1370.7332 | 1369.7259 | 1369.6666 | 0.0593 | 0 K.KPVPDFSFYDR.S                                                    |
| 336 - 344   | 1032.5933 | 1031.5860 | 1031.5400 | 0.0460 | 0 R.SAPIYTQPR.H                                                      |
| 345 - 368   | 2549.4067 | 2548.3995 | 2548.3206 | 0.0788 | 1 R.HLPPSKVLDADVTVDSVIGEGCVIK.N Carbamidomethyl (C)                  |
| 372 - 380   | 1017.6371 | 1016.6298 | 1016.5879 | 0.0419 | 0 K.IHHSVVGLR.S                                                      |
| 381 - 407   | 3008.4255 | 3007.4183 | 3007.3678 | 0.0505 | 1 R.SCISEGAIHEDSLLMGADYYETEADKK.L Carbamidomethyl (C)                |
| 381 - 407   | 3024.4282 | 3023.4209 | 3023.3627 | 0.0583 | 1 R.SCISEGAIHEDSLLMGADYYETEADKK.L Carbamidomethyl (C); Oxidation (M) |
| 428 - 435   | 900.5635  | 899.5562  | 899.5188  | 0.0374 | 1 R.AIIDKNAR.I                                                       |
| 442 - 453   | 1341.7533 | 1340.7460 | 1340.7048 | 0.0412 | 0 K.IINVDNVQEAAR.E                                                   |
| 442 - 461   | 2295.2383 | 2294.2310 | 2294.1542 | 0.0768 | 1 K.IINVDNVQEAARETDGYFIK.S                                           |
| 454 - 461   | 972.5197  | 971.5124  | 971.4600  | 0.0524 | 0 R.ETDGYFIK.S                                                       |

## Spot 1663

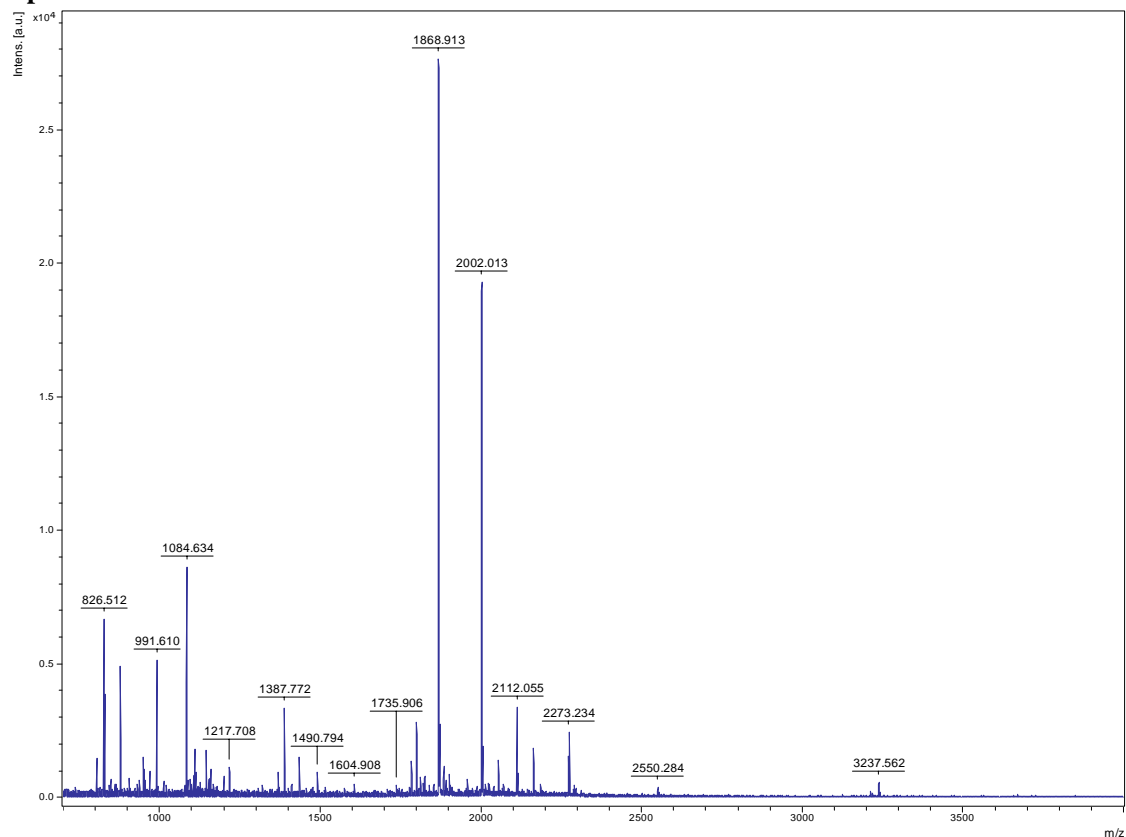

Match to: gi|34909168 Score: 164 Expect: 2.7e-12

### Matched peptides:

| Start - End | Observed  | Mr (expt) | Mr (calc) | Delta  | Miss Sequence                              |
|-------------|-----------|-----------|-----------|--------|--------------------------------------------|
| 21 - 29     | 1084.6340 | 1083.6268 | 1083.5600 | 0.0667 | 0 R.VFQVEYATK.A                            |
| 30 - 41     | 1159.6857 | 1158.6784 | 1158.6244 | 0.0540 | 0 K.AVDNSGTVVGIK.C                         |
| 42 - 52     | 1217.7081 | 1216.7009 | 1216.6485 | 0.0524 | 1 K.CKDGIPLGVGK.L Carbamidomethyl (C)      |
| 58 - 65     | 937.4857  | 936.4784  | 936.4157  | 0.0628 | 0 K.MMLEGSNR.R                             |
| 58 - 65     | 953.4823  | 952.4750  | 952.4106  | 0.0644 | 0 K.MMLEGSNR.R Oxidation (M)               |
| 58 - 65     | 969.4708  | 968.4635  | 968.4055  | 0.0580 | 0 K.MMLEGSNR.R 2 Oxidation (M)             |
| 67 - 86     | 2054.1504 | 2053.1431 | 2053.0605 | 0.0826 | 0 R.IHSVHWSGLAVAGLAADGR.Q                  |
| 102 - 110   | 991.6100  | 990.6027  | 990.5385  | 0.0642 | 0 K.VYGEPIVKE                              |
| 144 - 159   | 1783.9054 | 1782.8981 | 1782.8498 | 0.0483 | 0 R.DGPQLYMIEPSGVSYK.Y                     |
| 144 - 159   | 1799.9088 | 1798.9015 | 1798.8447 | 0.0568 | 0 R.DGPQLYMIEPSGVSYK.Y Oxidation (M)       |
| 160 - 167   | 826.5120  | 825.5047  | 825.4384  | 0.0663 | 0 K.YFGAALGK.G                             |
| 181 - 187   | 878.5057  | 877.4985  | 877.4327  | 0.0657 | 0 K.LSELTCE Carbamidomethyl (C)            |
| 196 - 205   | 1144.6542 | 1143.6469 | 1143.5924 | 0.0545 | 0 K.IYGVHDEAK.D                            |
| 196 - 207   | 1387.7725 | 1386.7652 | 1386.7143 | 0.0509 | 1 K.IYGVHDEAKDK.A                          |
| 206 - 222   | 2112.0547 | 2111.0474 | 2110.9629 | 0.0845 | 1 K.DKAFLELSWICDESNR.Q Carbamidomethyl (C) |
| 208 - 222   | 1811.8727 | 1810.8654 | 1810.8195 | 0.0459 | 0 K.AFELELSWICDESNR.Q                      |
| 208 - 222   | 1868.9128 | 1867.9056 | 1867.8410 | 0.0645 | 0 K.AFELELSWICDESNR.Q Carbamidomethyl (C)  |
| 223 - 236   | 1604.9080 | 1603.9007 | 1603.8682 | 0.0325 | 1 R.QHQKVPADLLEQAK.V                       |
| 227 - 236   | 1083.6642 | 1082.6569 | 1082.5971 | 0.0598 | 0 K.VPADLLEQAK.V                           |

### Spot 1666

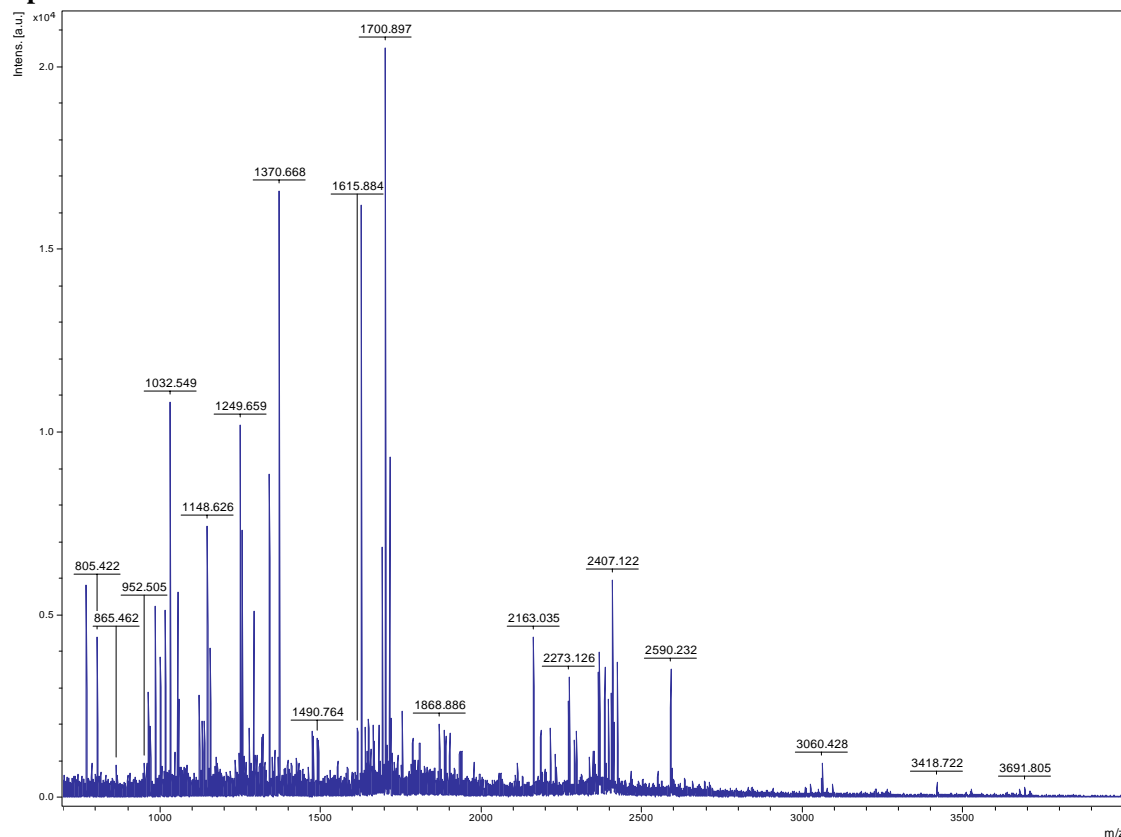

Match to: **gi|50944557**; Score: 137

Matched peptides:

| Start - End | Observed | Mr (expt) | Mr (calc) | Delta | Miss Sequence                           |
|-------------|----------|-----------|-----------|-------|-----------------------------------------|
| 44 - 61     | 1700.90  | 1699.89   | 1699.91   | -0.02 | 0 SVDESVLGIILGGAGTR                     |
| 70 - 81     | 1256.71  | 1255.70   | 1255.70   | -0.00 | 0 AKPAVPLGANYSR                         |
| 82 - 97     | 1786.93  | 1785.92   | 1785.93   | -0.00 | 0 LIDIPVSNCLNSNISK                      |
| 98 - 111    | 1625.85  | 1624.84   | 1624.86   | -0.01 | 0 IYVLTQFNSASLNR                        |
| 126 - 153   | 3060.43  | 3059.43   | 3059.44   | -0.01 | 0 NEGFVEVLAQQSPDNPWFQGTADAVR            |
| 206 - 219   | 1553.83  | 1552.83   | 1552.76   | 0.07  | 1 ATAFGLMKIDEEGR Oxidation (M)          |
| 220 - 233   | 1615.88  | 1614.88   | 1614.90   | -0.02 | 1 IVEFAEKPKGEQLK                        |
| 234 - 248   | 1649.81  | 1648.81   | 1648.82   | -0.01 | 0 AMMVDTTILGLDDVR                       |
| 234 - 248   | 1665.81  | 1664.81   | 1664.81   | -0.00 | 0 AMMVDTTILGLDDVR Oxidation (M)         |
| 234 - 248   | 1681.81  | 1680.81   | 1680.81   | 0.00  | 0 AMMVDTTILGLDDVR 2 Oxidation (M)       |
| 249 - 265   | 1932.97  | 1931.97   | 1931.97   | -0.01 | 1 AKEMPYIASMGYVISK 2 Oxidation (M)      |
| 266 - 273   | 986.58   | 985.58    | 985.57    | 0.00  | 0 NVMLQLLR                              |
| 266 - 273   | 1002.58  | 1001.58   | 1001.57   | 0.01  | 0 NVMLQLLR Oxidation (M)                |
| 274 - 296   | 2407.12  | 2406.12   | 2406.13   | -0.01 | 0 EQFPGANDFGSEVIPGATNIGMR               |
| 274 - 296   | 2423.12  | 2422.11   | 2422.12   | -0.01 | 0 EQFPGANDFGSEVIPGATNIGMR Oxidation (M) |
| 325 - 335   | 1370.67  | 1369.67   | 1369.67   | -0.00 | 0 KPVPDFSFYDR                           |
| 336 - 344   | 1032.55  | 1031.55   | 1031.54   | 0.01  | 0 SAPIYTQPR                             |
| 336 - 350   | 1691.85  | 1690.85   | 1690.92   | -0.06 | 1 SAPIYTQPRHLPPSK                       |
| 351 - 368   | 1889.93  | 1888.93   | 1888.95   | -0.02 | 0 VLDADVTDVIGEGCVIK                     |
| 372 - 380   | 1017.59  | 1016.59   | 1016.59   | -0.00 | 0 IHHSVVGLR                             |
| 442 - 453   | 1341.71  | 1340.70   | 1340.70   | 0.00  | 0 IINVDNVQEAAAR                         |
| 442 - 461   | 2295.13  | 2294.13   | 2294.15   | -0.03 | 1 IINVDNVQEAAARETDGYFIK                 |

Match to: **gi|54290767**; Score: 121

| Start - End | Observed | Mr (expt) | Mr (calc) | Delta | Miss Sequence                          |
|-------------|----------|-----------|-----------|-------|----------------------------------------|
| 12 - 34     | 2215.08  | 2214.07   | 2214.09   | -0.02 | 0 TVEAMQADAAAAAGADLVEIR                |
| 12 - 34     | 2231.08  | 2230.07   | 2230.09   | -0.02 | 0 TVEAMQADAAAAAGADLVEIR Oxidation (M)  |
| 35 - 44     | 1249.66  | 1248.66   | 1248.66   | -0.00 | 0 LDFIEGFRPR                           |
| 45 - 52     | 964.56   | 963.55    | 963.55    | 0.00  | 0 EHLPSLLR                             |
| 117 - 139   | 2590.23  | 2589.23   | 2589.24   | -0.01 | 0 LIVSSHNYESTPSCCELADLVAR              |
| 150 - 162   | 1319.67  | 1318.67   | 1318.67   | -0.00 | 0 IATTASDIADVSR                        |
| 193 - 206   | 1490.76  | 1489.76   | 1489.75   | 0.02  | 0 FGGYLTFTGLDATK                       |
| 217 - 225   | 1148.63  | 1147.62   | 1147.62   | 0.00  | 0 ELLDIYNIR                            |
| 253 - 273   | 2365.17  | 2364.16   | 2364.21   | -0.05 | 0 CLQSIGYNVYPLPLADDLAR                 |
| 309 - 318   | 1057.63  | 1056.63   | 1056.63   | -0.00 | 0 SIGAINTIIR                           |
| 324 - 358   | 3418.72  | 3417.72   | 3417.74   | -0.02 | 1 LVGYNTDYIGAISAIEDGIGGPGSKDAISPLAGR   |
| 349 - 358   | 970.51   | 969.51    | 969.52    | -0.01 | 0 DAAISPLAGR                           |
| 359 - 377   | 1700.90  | 1699.89   | 1700.00   | -0.10 | 1 LVVVVGAGGAGKAIAYGAK                  |
| 393 - 406   | 1292.73  | 1291.73   | 1291.74   | -0.01 | 0 AVSLAAAVGGHALR                       |
| 441 - 457   | 1932.97  | 1931.97   | 1932.00   | -0.04 | 1 KALSFYDVVFDVAVYAPK                   |
| 472 - 481   | 1122.60  | 1121.59   | 1121.59   | 0.00  | 0 VVSGVEMFVR                           |
| 472 - 481   | 1138.60  | 1137.60   | 1137.59   | 0.01  | 0 VVSGVEMFVR Oxidation (M)             |
| 482 - 502   | 2352.03  | 2351.03   | 2351.07   | -0.04 | 0 QAMGQFEHFTGGIEAPELMR Oxidation (M)   |
| 482 - 502   | 2368.19  | 2367.19   | 2367.06   | 0.13  | 0 QAMGQFEHFTGGIEAPELMR 2 Oxidation (M) |

## Spot 1670

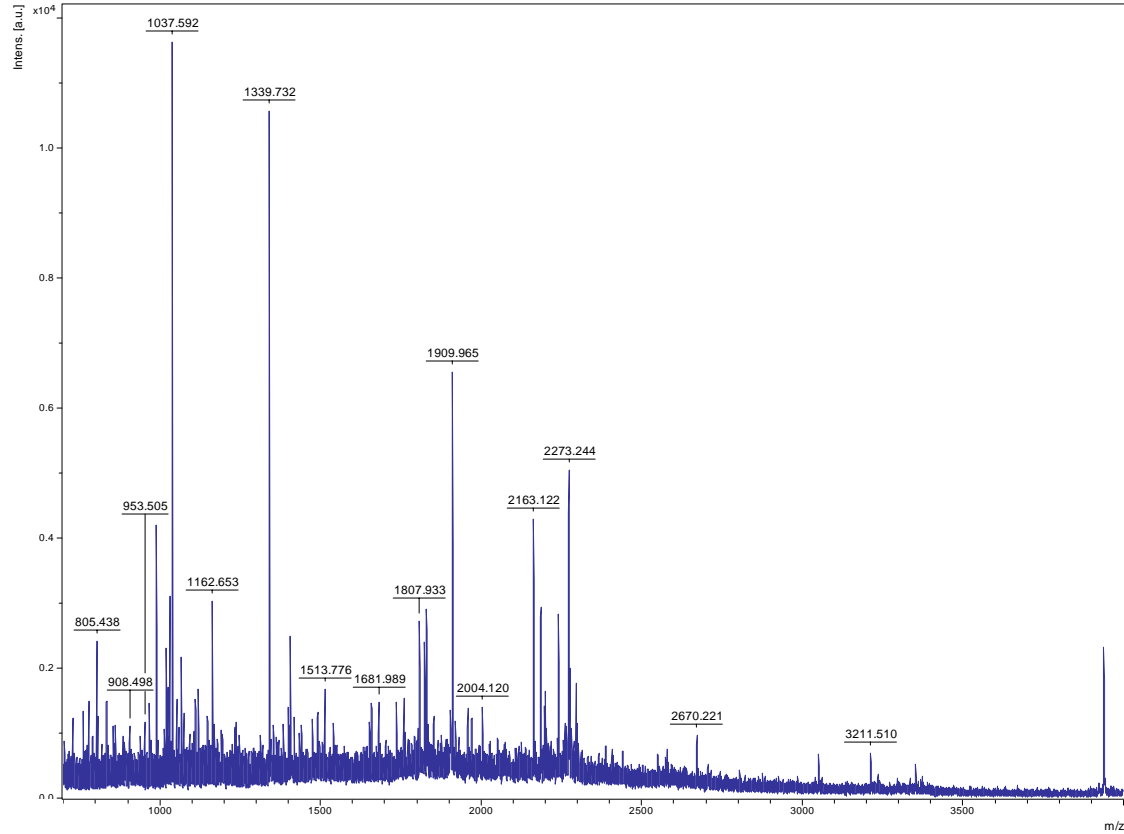

Match to: gi|77550894 Score: 107 Expect: 1.3e-06

### Matched peptides:

| Start - End | Observed  | Mr (expt) | Mr (calc) | Delta   | Miss Sequence                                                     |
|-------------|-----------|-----------|-----------|---------|-------------------------------------------------------------------|
| 9 - 27      | 1909.9325 | 1908.9252 | 1908.8700 | 0.0552  | 0 R.GEGAAATESEAYLEGEAVR.E                                         |
| 57 - 78     | 2280.2166 | 2279.2093 | 2279.1831 | 0.0262  | 0 K.ANDPALPLADQLIVMSPSGVQK.E Oxidation (M)                        |
| 121 - 149   | 3049.4187 | 3048.4114 | 3048.4289 | -0.0174 | 1 K.AYLMRGAGAVIHSHEMETCIATMLDPGAK.E 3 Oxidation (M)               |
| 126 - 149   | 2440.2495 | 2439.2422 | 2439.1344 | 0.1078  | 0 R.GAGAVIHSHEMETCIATMLDPGAK.E Carbamidomethyl (C); Oxidation (M) |
| 206 - 220   | 1759.9161 | 1758.9088 | 1758.8477 | 0.0611  | 0 R.NHGIVVWGDWVWVNAK.T                                            |
| 221 - 235   | 1829.8904 | 1828.8831 | 1828.8454 | 0.0377  | 0 K.TQAEYHYLFDAAIK.L Carbamidomethyl (C)                          |
| 236 - 255   | 2240.1247 | 2239.1174 | 2239.1273 | -0.0099 | 0 K.LYQLGIDWTTPEHGPVNAK.R                                         |
| 259 - 273   | 1490.7840 | 1489.7767 | 1489.7082 | 0.0685  | 0 R.SVLSSIPNGCPDSK.S                                              |
| 376 - 383   | 1020.5198 | 1019.5125 | 1019.5301 | -0.0176 | 0 K.QLQGHVWR.T Pyro-glu (N-term Q)                                |
| 390 - 404   | 1658.9159 | 1657.9086 | 1657.8562 | 0.0524  | 0 K.ELQGVVFDVPEALK.H                                              |
| 405 - 412   | 953.4377  | 952.4304  | 952.4337  | -0.0033 | 0 K.HWHASGMK.V                                                    |
| 422 - 437   | 1823.9095 | 1822.9022 | 1822.9325 | -0.0303 | 1 R.EAQRLFGNTAYGDLR.Q                                             |
| 426 - 437   | 1339.7279 | 1338.7206 | 1338.6931 | 0.0275  | 0 R.LLFGNTAYGDLR.Q                                                |
| 438 - 451   | 1651.8252 | 1650.8179 | 1650.7348 | 0.0832  | 0 R.QYLCGFFDITTTGNK.R Carbamidomethyl (C)                         |
| 438 - 452   | 1790.9027 | 1789.8954 | 1789.8093 | 0.0861  | 1 R.QYLCGFFDITTTGNK.R Carbamidomethyl (C); Pyro-glu (N-term Q)    |
| 487 - 510   | 2578.3571 | 2577.3498 | 2577.3451 | 0.0047  | 0 K.SAGFEVHSIRPGNAPLENHGFR.T                                      |

# Spot 1672

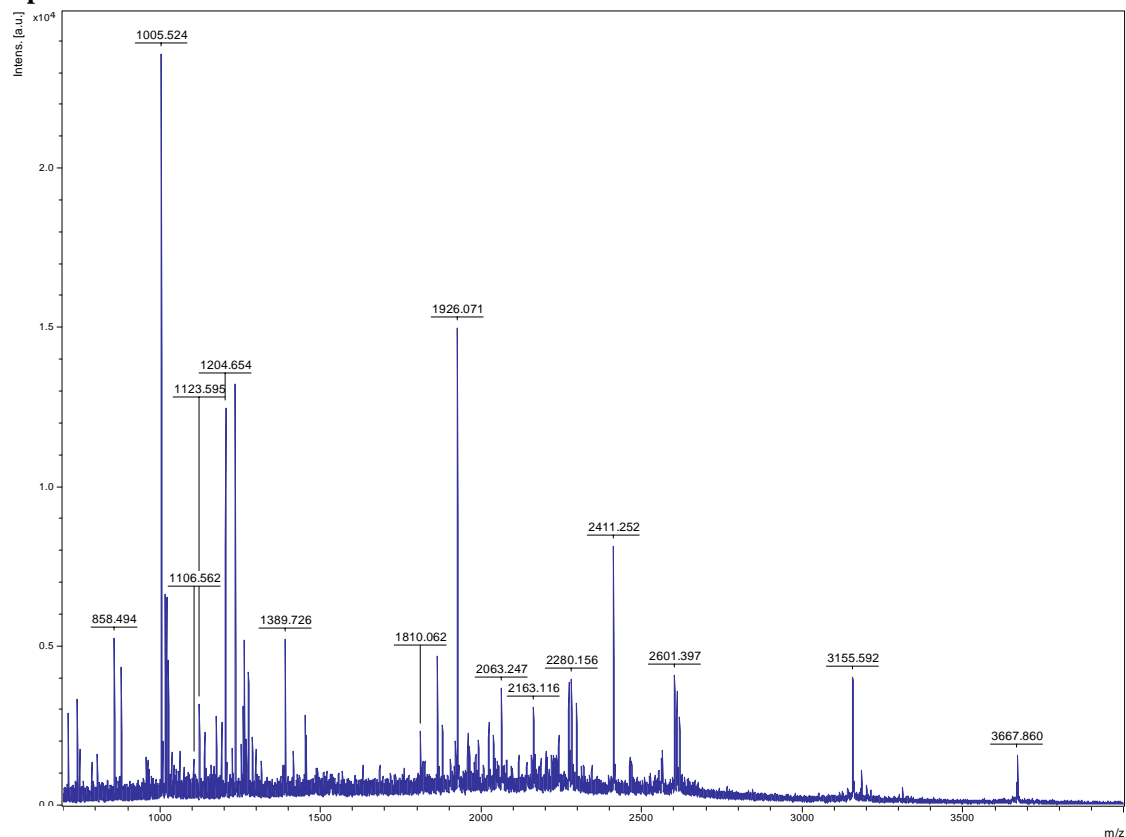

Match to: gj|14018066 Score: 227 Expect: 1.3e-18

## Matched peptides:

| Start - End | Observed  | Mr (expt) | Mr (calc) | Delta   | Miss Sequence                                |
|-------------|-----------|-----------|-----------|---------|----------------------------------------------|
| 20 - 37     | 1926.0418 | 1925.0345 | 1925.0006 | 0.0339  | 0 R.IGDLSLAHPNELVAVFTR.L                     |
| 44 - 64     | 2344.1993 | 2343.1920 | 2343.1277 | 0.0644  | 0 K.GMLQAHQIIAEYNNNAISEADR.E                 |
| 44 - 66     | 2601.2816 | 2600.2743 | 2600.2652 | 0.0091  | 1 K.GMLQAHQIIAEYNNNAISEADREK.L               |
| 44 - 66     | 2617.2725 | 2616.2652 | 2616.2601 | 0.0051  | 1 K.GMLQAHQIIAEYNNNAISEADREK.L Oxidation (M) |
| 67 - 77     | 1262.7125 | 1261.7052 | 1261.6666 | 0.0386  | 1 K.LKDGAFEDVLR.S                            |
| 157 - 167   | 1204.6559 | 1203.6486 | 1203.6360 | 0.0127  | 0 K.SIGNGVQFLNR.H                            |
| 173 - 188   | 2023.0850 | 2022.0777 | 2022.0396 | 0.0381  | 1 K.LFHDKESMYPLLNFRL.A                       |
| 173 - 188   | 2039.0631 | 2038.0558 | 2038.0346 | 0.0213  | 1 K.LFHDKESMYPLLNFRL.A Oxidation (M)         |
| 205 - 214   | 1015.5863 | 1014.5790 | 1014.5822 | -0.0031 | 0 R.SLSALQGALR.K                             |
| 215 - 235   | 2411.1745 | 2410.1672 | 2410.1301 | 0.0371  | 1 R.KAEHLGSLADTPYSEFHRR.F                    |
| 252 - 273   | 2462.3233 | 2461.3160 | 2461.2952 | 0.0209  | 0 R.SQETIHLLLDLEAPDPSTLEK.F                  |
| 326 - 336   | 1267.7833 | 1266.7760 | 1266.7408 | 0.0352  | 1 R.IKQQLNITPR.I                             |
| 328 - 336   | 1026.5701 | 1025.5628 | 1025.5618 | 0.0011  | 0 K.QQGLNITPR.I                              |
| 343 - 355   | 1389.7392 | 1388.7319 | 1388.6718 | 0.0601  | 0 R.LLPDATGTTCCQRRL Carbamidomethyl (C)      |
| 343 - 358   | 1759.9514 | 1758.9441 | 1758.8934 | 0.0507  | 1 R.LLPDATGTTCCQRLEK.V Carbamidomethyl (C)   |
| 359 - 369   | 1275.7612 | 1274.7539 | 1274.7095 | 0.0444  | 0 K.VLGTETHILR.V                             |
| 370 - 380   | 1287.7863 | 1286.7790 | 1286.7095 | 0.0696  | 1 R.VPFRTEGVLR.K                             |
| 446 - 456   | 1414.7532 | 1413.7459 | 1413.6928 | 0.0531  | 1 K.TKYPNSDLYWK.K                            |
| 494 - 512   | 2203.0301 | 2202.0228 | 2201.9873 | 0.0355  | 0 K.DTVGGYESHMAFTMPGLYR.V                    |
| 494 - 512   | 2219.0504 | 2218.0431 | 2217.9823 | 0.0609  | 0 K.DTVGGYESHMAFTMPGLYR.V Oxidation (M)      |
| 524 - 543   | 2280.0917 | 2279.0844 | 2279.0568 | 0.0276  | 0 K.FNIVSPGADMSIYFPYSES.R.K                  |
| 524 - 543   | 2296.1045 | 2295.0972 | 2295.0517 | 0.0455  | 0 K.FNIVSPGADMSIYFPYSES.R.K Oxidation (M)    |
| 546 - 567   | 2609.3048 | 2608.2975 | 2608.2656 | 0.0319  | 0 R.LTSLHPEIEELLYSEVDNNEHK.F                 |
| 574 - 583   | 1176.6710 | 1175.6637 | 1175.6485 | 0.0153  | 0 R.NKPIIFSMAR.L                             |
| 574 - 583   | 1192.6841 | 1191.6768 | 1191.6434 | 0.0335  | 0 R.NKPIIFSMAR.L Oxidation (M)               |
| 603 - 621   | 2078.1265 | 2077.1192 | 2077.0625 | 0.0567  | 0 R.LQELVNLVVCGDHGNPSK.D Carbamidomethyl (C) |
| 622 - 630   | 1123.5758 | 1122.5685 | 1122.5193 | 0.0493  | 1 K.DKEEQAEFK.K                              |
| 624 - 630   | 880.4092  | 879.4019  | 879.3974  | 0.0046  | 0 K.EEQAEFK.K                                |
| 631 - 646   | 1991.0206 | 1990.0133 | 1990.0094 | 0.0039  | 1 K.KMFDLIEQYNLNGHIR.W                       |
| 632 - 646   | 1862.9697 | 1861.9624 | 1861.9144 | 0.0480  | 0 K.MFDLIEQYNLNGHIR.W                        |
| 632 - 646   | 1878.9614 | 1877.9541 | 1877.9094 | 0.0448  | 0 K.MFDLIEQYNLNGHIR.W Oxidation (M)          |
| 647 - 654   | 1005.4984 | 1004.4911 | 1004.4862 | 0.0050  | 0 R.WISAQMN.R.V                              |
| 723 - 733   | 1253.7256 | 1252.7183 | 1252.6703 | 0.0481  | 0 K.ASALLVEFFEK.C                            |
| 744 - 751   | 858.4303  | 857.4230  | 857.4719  | -0.0489 | 0 K.ISQGLQR.I                                |
| 788 - 797   | 1299.7509 | 1298.7436 | 1298.7056 | 0.0380  | 1 R.RYLEMLYALK.Y                             |

### Spot 1676

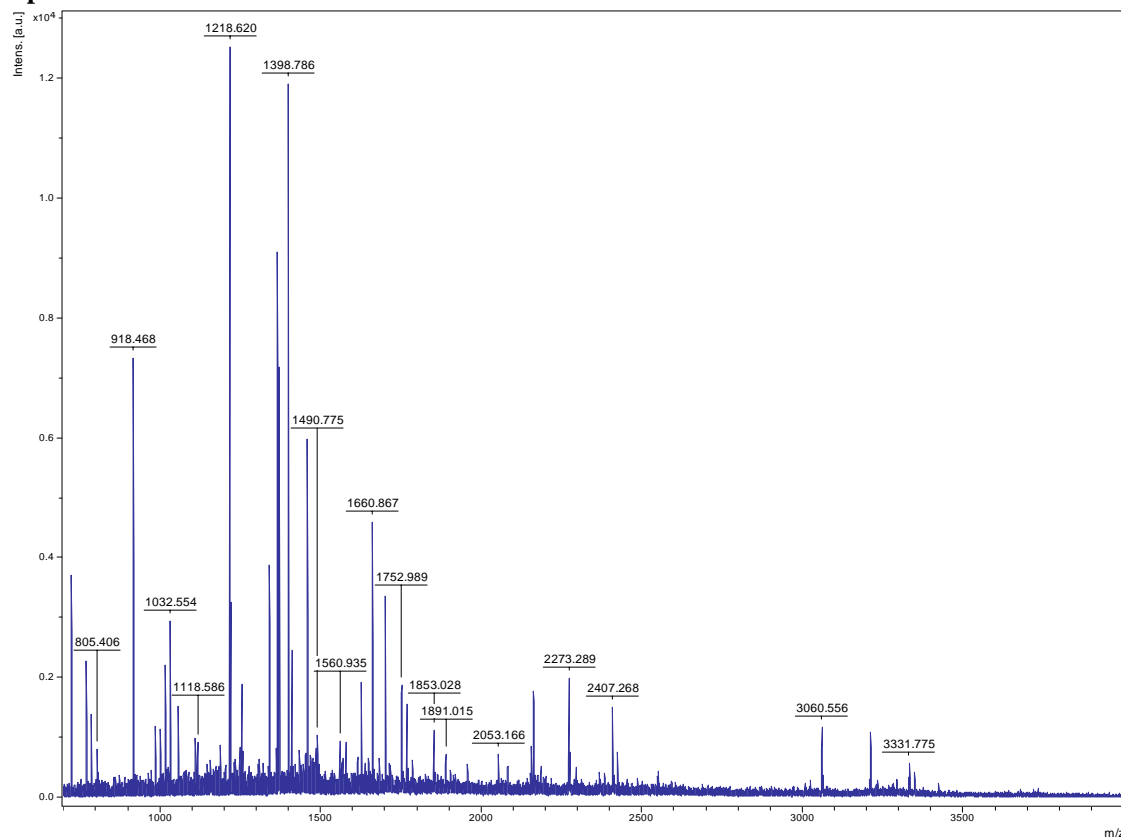

Match to: gi|34894958 Score: 111 Expect: 5.3e-07

#### Matched peptides:

| Start - End | Observed  | Mr (expt) | Mr (calc) | Delta   | Miss Sequence            |                     |
|-------------|-----------|-----------|-----------|---------|--------------------------|---------------------|
| 100 - 115   | 1660.8396 | 1659.8323 | 1659.8250 | 0.0074  | 0 K.TAIEGDVVGTCVNR.G     | Carbamidomethyl (C) |
| 122 - 129   | 786.4196  | 785.4123  | 785.4759  | -0.0636 | 0 K.ALLAVSGR.M           |                     |
| 130 - 140   | 1469.7053 | 1468.6980 | 1468.6551 | 0.0429  | 1 R.MRELQDEHHMK.S        | Oxidation (M)       |
| 130 - 140   | 1485.7142 | 1484.7069 | 1484.6500 | 0.0569  | 1 R.MRELQDEHHMK.S        | 2 Oxidation (M)     |
| 141 - 153   | 1366.7245 | 1365.7172 | 1365.6888 | 0.0284  | 0 K.SLGLQVSTAGYDR.Q      |                     |
| 177 - 192   | 1560.9250 | 1559.9177 | 1559.8922 | 0.0255  | 0 K.ALGVDLITGFGTIVGK.Q   |                     |
| 200 - 210   | 1218.6220 | 1217.6147 | 1217.6040 | 0.0107  | 0 K.VGFDPDNEITAR.N       |                     |
| 232 - 241   | 1118.5821 | 1117.5748 | 1117.5768 | -0.0019 | 0 K.TVFTSDHALK.L         |                     |
| 319 - 331   | 1410.8461 | 1409.8388 | 1409.8129 | 0.0259  | 0 K.DGKPVLIHLDIAK.T      |                     |
| 334 - 350   | 1852.9564 | 1851.9491 | 1851.9690 | -0.0199 | 1 K.EHKETLEVDAALIATGR.A  |                     |
| 337 - 350   | 1458.7978 | 1457.7905 | 1457.7725 | 0.0180  | 0 K.ETLEVDAALIATGR.A     |                     |
| 356 - 368   | 1398.7983 | 1397.7910 | 1397.7626 | 0.0284  | 0 K.GLLENVNVVTQR.G       |                     |
| 369 - 376   | 918.4486  | 917.4413  | 917.4606  | -0.0193 | 0 R.GFVPPVDER.M          |                     |
| 400 - 416   | 1752.9525 | 1751.9452 | 1751.9352 | 0.0101  | 0 K.LMLAHAASAQGISVVER.I  |                     |
| 400 - 416   | 1768.9635 | 1767.9562 | 1767.9301 | 0.0261  | 0 K.LMLAHAASAQGISVVER.I  | Oxidation (M)       |
| 473 - 484   | 1187.6314 | 1186.6241 | 1186.5829 | 0.0412  | 0 K.ALAENEGDGLAK.M       |                     |
| 526 - 543   | 2053.0578 | 2052.0505 | 2052.0680 | -0.0174 | 0 K.FAVHAHPTLSEVLDELFK.A |                     |

Match to: gi|50944557 Score: 75 Expect: 0.0022

#### Matched peptides:

| Start - End | Observed  | Mr (expt) | Mr (calc) | Delta   | Miss Sequence                 |                     |
|-------------|-----------|-----------|-----------|---------|-------------------------------|---------------------|
| 44 - 61     | 1700.9194 | 1699.9121 | 1699.9104 | 0.0018  | 0 R.SVDESVLGILGGGAGTR.L       |                     |
| 70 - 81     | 1256.7346 | 1255.7273 | 1255.7036 | 0.0237  | 0 R.AKPAVPLGANYR.L            |                     |
| 98 - 111    | 1625.8699 | 1624.8626 | 1624.8573 | 0.0054  | 0 K.IYVLTQFNSASLNR.H          |                     |
| 220 - 233   | 1615.9266 | 1614.9193 | 1614.8980 | 0.0213  | 1 R.IVEFAEKPKGEQLK.A          |                     |
| 266 - 273   | 986.5691  | 985.5618  | 985.5742  | -0.0124 | 0 K.NVMLQLLR.E                |                     |
| 266 - 273   | 1002.5706 | 1001.5633 | 1001.5692 | -0.0058 | 0 K.NVMLQLLR.E                | Oxidation (M)       |
| 274 - 296   | 2407.1113 | 2406.1040 | 2406.1273 | -0.0233 | 0 R.EQFFGANDFGSEVIPGATNIGMR.V |                     |
| 274 - 296   | 2423.0827 | 2422.0754 | 2422.1222 | -0.0468 | 0 R.EQFFGANDFGSEVIPGATNIGMR.V | Oxidation (M)       |
| 325 - 335   | 1370.7056 | 1369.6983 | 1369.6666 | 0.0317  | 0 K.KPVPDFSFYDR.S             |                     |
| 336 - 344   | 1032.5407 | 1031.5334 | 1031.5400 | -0.0066 | 0 R.SAPIYTPQR.H               |                     |
| 351 - 368   | 1889.9657 | 1888.9584 | 1888.9451 | 0.0133  | 0 K.VLDADVTDVIGEGCVIK.N       | Carbamidomethyl (C) |
| 372 - 380   | 1017.5843 | 1016.5770 | 1016.5879 | -0.0109 | 0 K.IHHSVVGLR.S               |                     |
| 442 - 453   | 1341.7362 | 1340.7289 | 1340.7048 | 0.0242  | 0 K.IINVDNVQEARE.E            |                     |

### Spot 1677

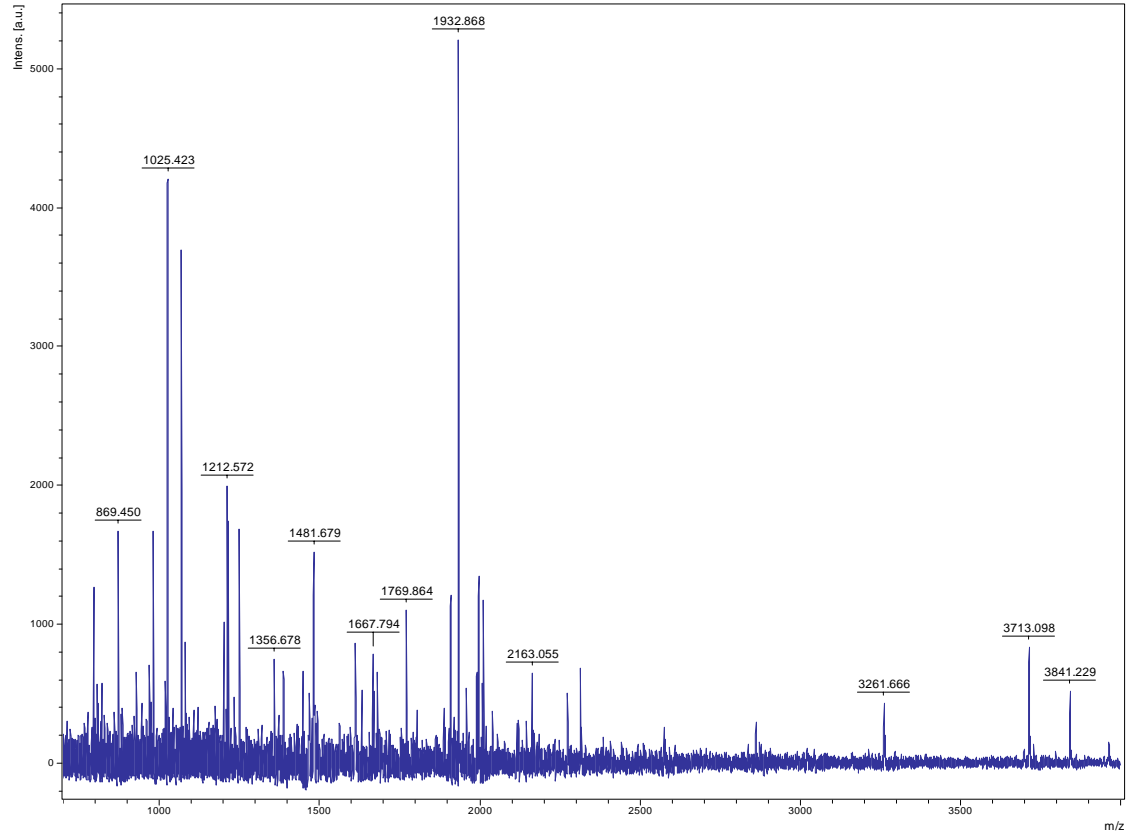

Match to: BAC82932 Score: 111 Expect: 5.3e-07

#### Matched peptides:

| Start - End | Observed  | Mr (expt) | Mr (calc) | Delta  | Miss Sequence                                                 |
|-------------|-----------|-----------|-----------|--------|---------------------------------------------------------------|
| 37 - 44     | 1025.5213 | 1024.5140 | 1024.4250 | 0.0890 | 0 K.FEDGWESR.W                                                |
| 84 - 99     | 1909.0634 | 1908.0561 | 1907.8941 | 0.1621 | 1 R.FYAI SAEY PEF S NKDK.T                                    |
| 113 - 121   | 968.5460  | 967.5388  | 967.4433  | 0.0955 | 0 K.LDCGGGYV.KL Carbamidomethyl (C)                           |
| 132 - 153   | 2441.3348 | 2440.3275 | 2440.1078 | 0.2197 | 1 K.FGGDTPYSIMFGPDICGYSTKK.V Carbamidomethyl (C)              |
| 169 - 201   | 3841.1385 | 3840.1312 | 3839.9291 | 0.2021 | 1 K.KDVP CETDQLSHVYTLIIHPDATY TILIDNVEK.Q Carbamidomethyl (C) |
| 170 - 201   | 3713.0494 | 3712.0421 | 3711.8342 | 0.2080 | 0 K.DVPCETDQLSHVYTLIIHPDATY TILIDNVEK.Q Carbamidomethyl (C)   |
| 202 - 216   | 1770.0445 | 1769.0372 | 1768.8784 | 0.1588 | 0 K.QSGSIYEHWDILPPK.Q                                         |
| 252 - 259   | 884.5161  | 883.5088  | 883.4287  | 0.0801 | 0 K.EIPDPDAK.K                                                |
| 260 - 283   | 2861.4629 | 2860.4556 | 2860.2351 | 0.2205 | 0 K.KPEDWDEEDGEWTAPTIPNPEYK.G                                 |
| 293 - 299   | 820.4938  | 819.4865  | 819.3875  | 0.0990 | 0 K.NPNYQGK.W                                                 |
| 302 - 323   | 2575.4298 | 2574.4225 | 2574.1988 | 0.2237 | 1 K.APMIDNPDFKDDPYIYAFDSLK.Y                                  |
| 324 - 333   | 1248.7968 | 1247.7895 | 1247.6914 | 0.0982 | 0 K.YIGIELWQVK.S                                              |
| 334 - 351   | 1996.1770 | 1995.1697 | 1994.9836 | 0.1861 | 0 K.SGTLFDNFLTDDPELAK.T                                       |
| 352 - 360   | 1068.5898 | 1067.5825 | 1067.4923 | 0.0902 | 0 K.TFAEETWGK.H                                               |
| 377 - 383   | 805.4655  | 804.4582  | 804.3501  | 0.1081 | 0 K.EEEEEAAK.A                                                |

## Spot 1681

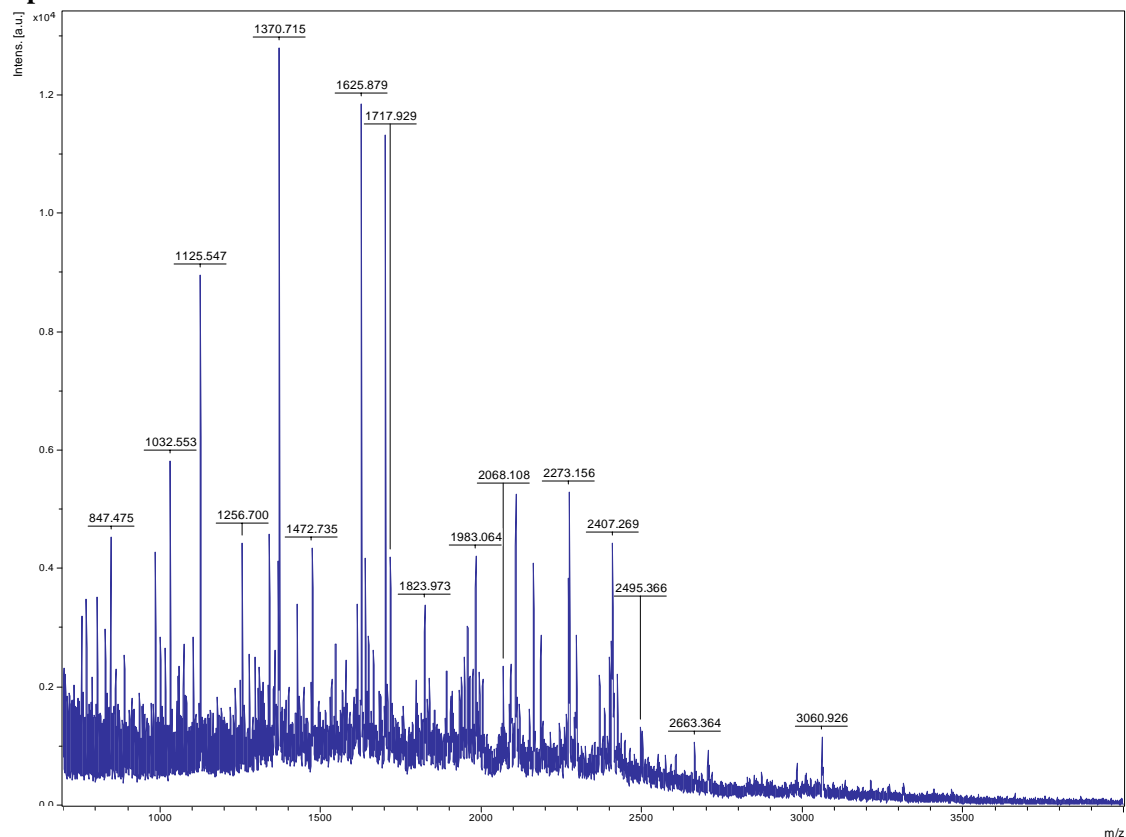

Match to: gi|50944557; Score: 90

### Matched peptides:

| Start - End | Observed | Mr (expt) | Mr (calc) | Delta | Miss Sequence                           |
|-------------|----------|-----------|-----------|-------|-----------------------------------------|
| 44 - 61     | 1700.93  | 1699.93   | 1699.91   | 0.02  | 0 SVDESVLGILGGAGTR                      |
| 70 - 81     | 1256.70  | 1255.70   | 1255.70   | -0.01 | 0 AKPAVPLGANR                           |
| 98 - 111    | 1625.88  | 1624.88   | 1624.86   | 0.02  | 0 IYVLTQFNSASLNR                        |
| 234 - 248   | 1649.90  | 1648.90   | 1648.82   | 0.08  | 0 AMMVDITILGLDDVR                       |
| 234 - 248   | 1665.88  | 1664.88   | 1664.81   | 0.06  | 0 AMMVDITILGLDDVR Oxidation (M)         |
| 251 - 265   | 1717.93  | 1716.93   | 1716.85   | 0.08  | 0 EMPYIASMGIYVISK Oxidation (M)         |
| 266 - 273   | 986.58   | 985.58    | 985.57    | 0.00  | 0 NVMLQLLR                              |
| 266 - 273   | 1002.57  | 1001.57   | 1001.57   | -0.00 | 0 NVMLQLLR Oxidation (M)                |
| 274 - 296   | 2407.27  | 2406.27   | 2406.13   | 0.14  | 0 EQFPGANDFGSEVIPGATNIGMR               |
| 274 - 296   | 2423.20  | 2422.20   | 2422.12   | 0.07  | 0 EQFPGANDFGSEVIPGATNIGMR Oxidation (M) |
| 325 - 335   | 1370.71  | 1369.71   | 1369.67   | 0.05  | 0 KPVPDFSFYDR                           |
| 336 - 344   | 1032.55  | 1031.55   | 1031.54   | 0.01  | 0 SAPIYTPQR                             |
| 372 - 380   | 1017.59  | 1016.59   | 1016.59   | -0.00 | 0 IHHSVVGLR                             |
| 442 - 453   | 1341.71  | 1340.71   | 1340.70   | 0.00  | 0 IINVDNVQEAAR                          |
| 442 - 461   | 2295.22  | 2294.22   | 2294.15   | 0.06  | 1 IINVDNVQEAARETDGYFIK                  |

Match to: gi|50940893; Score: 85

### Matched peptides:

| Start - End | Observed | Mr (expt) | Mr (calc) | Delta | Miss Sequence                   |
|-------------|----------|-----------|-----------|-------|---------------------------------|
| 129 - 137   | 1125.55  | 1124.54   | 1124.55   | -0.01 | 0 ETPLYFAER                     |
| 145 - 156   | 1321.63  | 1320.63   | 1320.69   | -0.05 | 1 ADGTGPMIYLKR                  |
| 156 - 166   | 1277.69  | 1276.69   | 1276.63   | 0.06  | 1 REDLNHTGAHK                   |
| 185 - 204   | 1983.06  | 1982.06   | 1982.00   | 0.06  | 0 IIAETGAGQHGVATATVCAR          |
| 205 - 220   | 1947.86  | 1946.86   | 1946.87   | -0.01 | 0 FGLQCIYMGAQDMER Oxidation (M) |
| 221 - 227   | 847.47   | 846.47    | 846.47    | 0.00  | 0 QALNVFR                       |
| 228 - 236   | 1032.55  | 1031.55   | 1031.58   | -0.03 | 1 MKLLGAEVR Oxidation (M)       |
| 401 - 417   | 1958.03  | 1957.03   | 1956.91   | 0.12  | 1 AEYDSVTDQEALDAFKR             |
| 421 - 439   | 2068.11  | 2067.11   | 2067.13   | -0.02 | 0 LEGHIPALETSHALAYLEK           |
| 440 - 449   | 1127.60  | 1126.60   | 1126.58   | 0.02  | 0 LCPTLPDGVR                    |
| 450 - 457   | 890.45   | 889.45    | 889.44    | 0.01  | 0 VVVNCSGR                      |
| 458 - 467   | 1057.56  | 1056.56   | 1056.52   | 0.04  | 1 GDKDVHTASK                    |



## Spot 1693

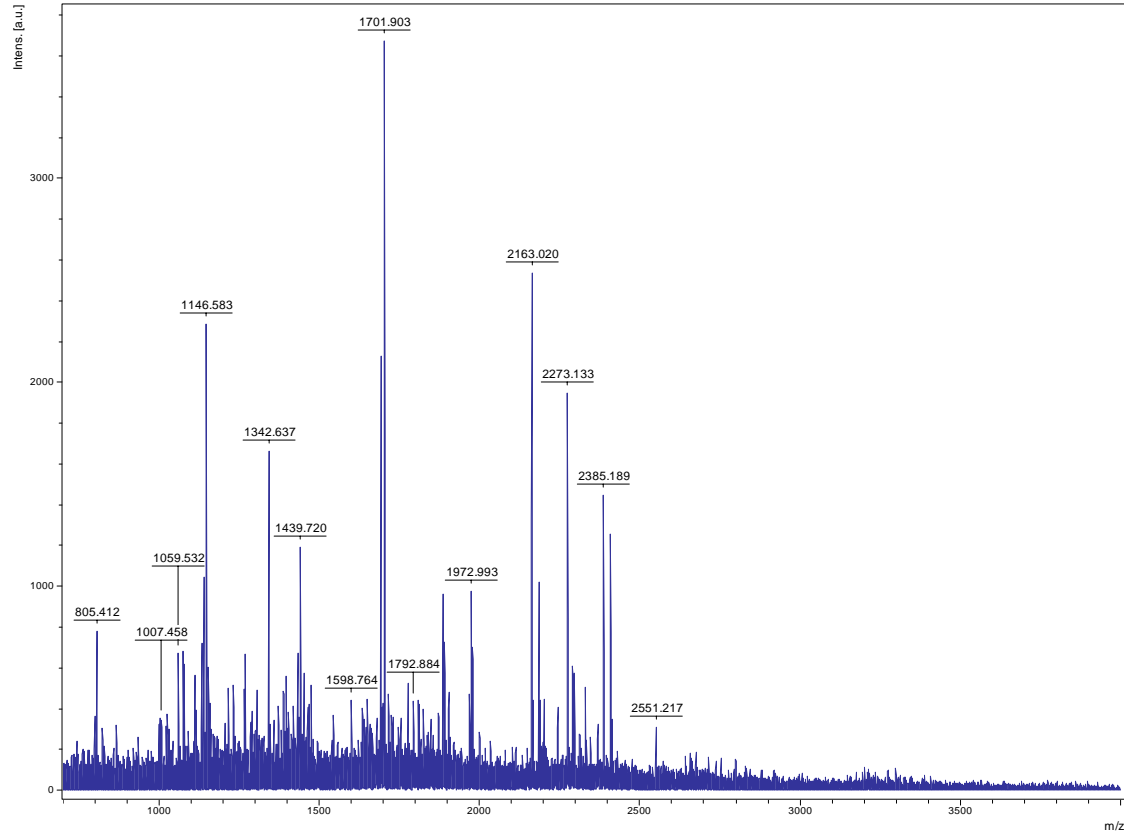

Match to: gi|77549556 Score: 113 Expect: 8.4e-07

### Matched peptides:

| Start - End | Observed  | Mr (expt) | Mr (calc) | Delta   | Miss Sequence                              |
|-------------|-----------|-----------|-----------|---------|--------------------------------------------|
| 41 - 60     | 1977.8444 | 1976.8371 | 1976.8751 | -0.0380 | 0 K.TVGGDDAFNTFFSETGAGK.H                  |
| 65 - 79     | 1701.9028 | 1700.8956 | 1700.8984 | -0.0029 | 0 R.AVFDLEPTVIDEVR.T                       |
| 85 - 96     | 1396.7256 | 1395.7183 | 1395.7510 | -0.0327 | 0 R.QLFHPEQLISGK.E                         |
| 85 - 105    | 2385.1890 | 2384.1817 | 2384.1872 | -0.0055 | 1 R.QLFHPEQLISGKEDAANNFAR.G                |
| 97 - 105    | 1007.4576 | 1006.4504 | 1006.4468 | -0.0036 | 0 K.EDAANNFAR.G                            |
| 113 - 121   | 1132.5645 | 1131.5572 | 1131.5594 | -0.0022 | 0 K.EIVDLCLDR.I Carbamidomethyl (C)        |
| 216 - 229   | 1691.8582 | 1690.8509 | 1690.8638 | -0.0129 | 0 R.SLDIERPTYTNLNR.L                       |
| 230 - 243   | 1473.8472 | 1472.8399 | 1472.8562 | -0.0163 | 0 R.LVSQVISSLTASLR.F                       |
| 265 - 280   | 1792.8840 | 1791.8768 | 1791.9229 | -0.0461 | 0 R.IHFMLSSYPVISAEK.A                      |
| 312 - 320   | 1153.5559 | 1152.5486 | 1152.4588 | 0.0898  | 0 K.YMACCLMYR.G                            |
| 340 - 352   | 1598.7642 | 1597.7569 | 1597.7599 | -0.0030 | 0 R.TIQFVDWCPTGFK.C Carbamidomethyl (C)    |
| 374 - 390   | 1885.9169 | 1884.9096 | 1884.9073 | 0.0023  | 0 R.AVCMISNSTSVVEVFSRI Carbamidomethyl (C) |
| 395 - 402   | 1059.5323 | 1058.5251 | 1058.5219 | 0.0032  | 1 K.FDLMYSKR.A                             |
| 395 - 402   | 1075.5177 | 1074.5104 | 1074.5168 | -0.0064 | 1 K.FDLMYSKR.A Oxidation (M)               |

## Spot 1694

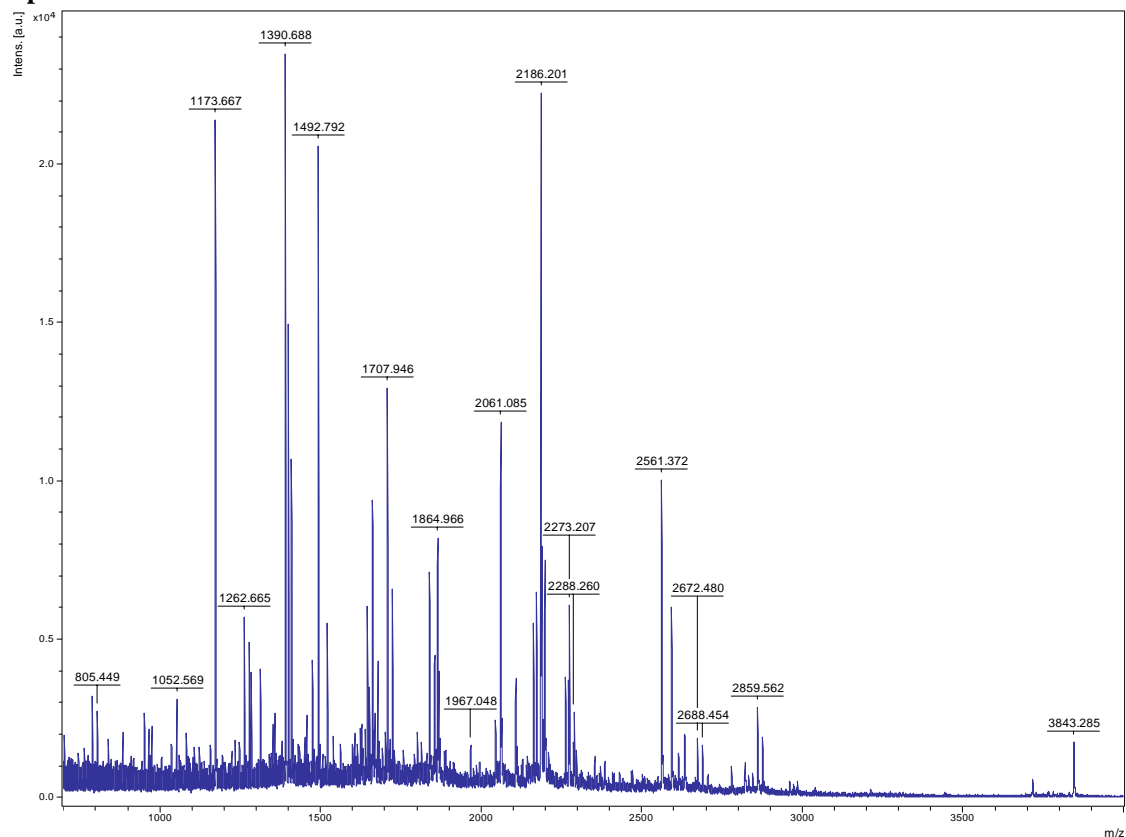

Match to: gi|84028177; Score: 235

### Matched peptides:

| Start - End | Observed | Mr (expt) | Mr (calc) | Delta | Miss Sequence                           |
|-------------|----------|-----------|-----------|-------|-----------------------------------------|
| 71 - 95     | 2561.37  | 2560.37   | 2560.30   | 0.07  | ITDEPTGAGAVGQVCQVIGAVVDVR               |
| 96 - 115    | 2262.25  | 2261.25   | 2261.21   | 0.04  | FDEGLPILTALEVLVDHNR                     |
| 116 - 130   | 1707.95  | 1706.94   | 1706.91   | 0.03  | LVLEVAQHLGENMVVR                        |
| 116 - 130   | 1723.95  | 1722.95   | 1722.91   | 0.04  | LVLEVAQHLGENMVVR Oxidation (M)          |
| 131 - 142   | 1262.66  | 1261.66   | 1261.63   | 0.03  | TIAMDGTEGLVR                            |
| 131 - 142   | 1278.67  | 1277.66   | 1277.63   | 0.03  | TIAMDGTEGLVR Oxidation (M)              |
| 146 - 159   | 1409.83  | 1408.82   | 1408.80   | 0.02  | VLNTGSPITVPVGR                          |
| 165 - 189   | 2859.56  | 2858.56   | 2858.47   | 0.08  | IMNVIGEPIDEKGDITTNHFLPIHR               |
| 165 - 189   | 2875.59  | 2874.59   | 2874.47   | 0.12  | IMNVIGEPIDEKGDITTNHFLPIHR Oxidation (M) |
| 177 - 189   | 1520.82  | 1519.81   | 1519.79   | 0.02  | GDITTNHFLPIHR                           |
| 190 - 209   | 2172.21  | 2171.20   | 2171.15   | 0.06  | EAPAFVEQATEQQILVTGIK                    |
| 210 - 219   | 1173.67  | 1172.66   | 1172.66   | 0.01  | VVDLLAPYQR                              |
| 223 - 233   | 975.58   | 974.57    | 974.55    | 0.02  | IGLFGGAGVVK                             |
| 234 - 246   | 1457.83  | 1456.83   | 1456.83   | -0.01 | TVLIMELINNVAK                           |
| 234 - 246   | 1473.86  | 1472.86   | 1472.83   | 0.03  | TVLIMELINNVAK Oxidation (M)             |
| 247 - 260   | 1390.69  | 1389.69   | 1389.68   | 0.01  | AHGGFSVFAGVGER                          |
| 261 - 269   | 1123.58  | 1122.58   | 1122.54   | 0.03  | TREGNDLYR                               |
| 263 - 278   | 1852.91  | 1851.91   | 1851.90   | 0.01  | EGNDLYREMIESGVIK                        |
| 263 - 278   | 1868.95  | 1867.94   | 1867.90   | 0.04  | EGNDLYREMIESGVIK Oxidation (M)          |
| 288 - 302   | 1662.80  | 1661.79   | 1661.77   | 0.03  | CALVYQGMNEPPGAR                         |
| 288 - 302   | 1678.81  | 1677.81   | 1677.76   | 0.05  | CALVYQGMNEPPGAR Oxidation (M)           |
| 305 - 317   | 1399.79  | 1398.79   | 1398.76   | 0.03  | VGLTGLTVAEHFR                           |
| 318 - 333   | 1864.97  | 1863.96   | 1863.94   | 0.03  | DAEGQDVLLEFDNIFR                        |
| 334 - 347   | 1492.79  | 1491.79   | 1491.77   | 0.02  | FTQANSEVSALLGR                          |
| 348 - 368   | 2186.20  | 2185.20   | 2185.14   | 0.06  | IPSAVGYQPTLATDLGGLQER                   |
| 374 - 410   | 3843.29  | 3842.28   | 3841.97   | 0.31  | KGSITSVQAIYVPADDDLPAPATTF AHL DATTVLSR  |
| 411 - 429   | 2044.05  | 2043.05   | 2043.02   | 0.03  | QISELGIYPAVDPLDSTR Pyro-glu (N-term Q)  |
| 411 - 429   | 2061.08  | 2060.08   | 2060.04   | 0.04  | QISELGIYPAVDPLDSTR                      |
| 430 - 445   | 1839.91  | 1838.91   | 1838.87   | 0.03  | MLSPHVLGEDHYNTAR                        |
| 430 - 445   | 1855.91  | 1854.91   | 1854.87   | 0.04  | MLSPHVLGEDHYNTAR Oxidation (M)          |
| 456 - 479   | 2672.48  | 2671.48   | 2671.37   | 0.10  | NLQDIIAILGMDLESEDDKLTVAR                |
| 456 - 479   | 2688.45  | 2687.45   | 2687.37   | 0.08  | NLQDIIAILGMDLESEDDKLTVAR Oxidation (M)  |

Match to: gi|15823775; Score: 94

### Matched peptides:

| Start - End | Observed | Mr (expt) | Mr (calc) | Delta | Miss Sequence                       |
|-------------|----------|-----------|-----------|-------|-------------------------------------|
| 28 - 36     | 965.56   | 964.56    | 964.53    | 0.02  | SGFISLVSR                           |
| 86 - 106    | 2163.09  | 2162.09   | 2162.08   | 0.01  | LNGGLGTTMGCTGPKSVIEVR Oxidation (M) |
| 151 - 168   | 2198.08  | 2197.08   | 2197.02   | 0.06  | YSNSNIEHTFNQSQYPR                   |
| 169 - 180   | 1358.75  | 1357.75   | 1357.75   | -0.00 | IVTEDFLPLPSK                        |
| 215 - 232   | 1967.05  | 1966.05   | 1966.00   | 0.04  | EYVAVNSDNLGAIVDIK                   |
| 233 - 251   | 2353.22  | 2352.21   | 2352.14   | 0.08  | ILNHLIHNQNECYMEVTPK                 |
| 258 - 267   | 1052.57  | 1051.57   | 1051.53   | 0.04  | GGTLISYEGR                          |
| 268 - 285   | 2108.12  | 2107.12   | 2107.09   | 0.03  | VQLLEIAQVPDEHVNEFK                  |
| 330 - 342   | 1312.76  | 1311.76   | 1311.75   | 0.01  | VLQLETAAGAAIR                       |
| 343 - 354   | 1390.69  | 1389.69   | 1389.78   | -0.09 | FFEKAIQIVNPR                        |
| 347 - 354   | 839.50   | 838.50    | 838.50    | -0.00 | AIGIVNPR                            |
| 347 - 356   | 1082.60  | 1081.60   | 1081.64   | -0.03 | AIGIVPRSR                           |
| 425 - 438   | 1451.75  | 1450.75   | 1450.75   | 0.00  | VSGDVVWFGSGVTLK                     |

## Spot 1695

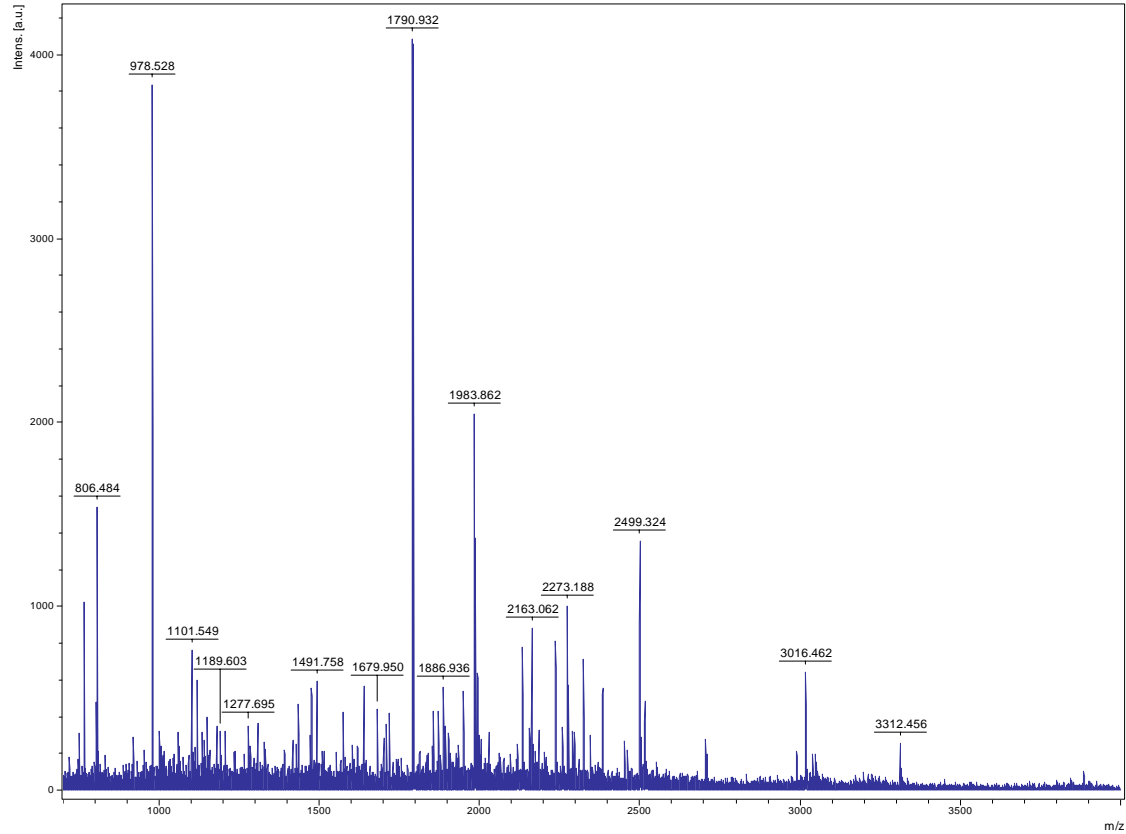

Match to: gi|33113259; Score: 183

### Matched peptides:

| Start - End | Observed | Mr (expt) | Mr (calc) | Delta | Miss Sequence                          |
|-------------|----------|-----------|-----------|-------|----------------------------------------|
| 18 - 35     | 1983.86  | 1982.86   | 1982.85   | 0.01  | 0 GNPTVEVDVCCSDGTFAR                   |
| 36 - 53     | 1790.93  | 1789.93   | 1789.92   | 0.01  | 0 AAVPSGASTGVYEALER                    |
| 133 - 147   | 1679.95  | 1678.95   | 1678.95   | -0.00 | 1 KIPLYQHIANLAGNK                      |
| 169 - 185   | 1854.94  | 1853.93   | 1853.94   | -0.01 | 0 LAMQEFMILPTGAASFK                    |
| 169 - 185   | 1870.95  | 1869.94   | 1869.94   | 0.01  | 0 LAMQEFMILPTGAASFK Oxidation (M)      |
| 169 - 185   | 1886.94  | 1885.93   | 1885.93   | 0.00  | 0 LAMQEFMILPTGAASFK 2 Oxidation (M)    |
| 190 - 199   | 1189.60  | 1188.60   | 1188.60   | 0.00  | 0 MGVEVYHNLK                           |
| 206 - 227   | 2324.06  | 2323.06   | 2323.04   | 0.02  | 0 YGQDATNVGDEGGFAPNIQENK               |
| 291 - 315   | 3016.46  | 3015.46   | 3015.34   | 0.11  | 0 SFVSEYPIVSIEDPFQDDWEHYAK             |
| 316 - 338   | 2499.32  | 2498.32   | 2498.27   | 0.05  | 0 MTAEIGEQQVIGDGLLVNPNTR               |
| 316 - 338   | 2515.31  | 2514.31   | 2514.26   | 0.04  | 0 MTAEIGEQQVIGDGLLVNPNTR Oxidation (M) |
| 347 - 354   | 918.53   | 917.52    | 917.50    | 0.02  | 0 SCNALLLK                             |
| 355 - 369   | 1573.84  | 1572.84   | 1572.84   | 0.00  | 0 VNQIGSVTESIEAVK                      |
| 374 - 383   | 1101.55  | 1100.55   | 1100.52   | 0.03  | 0 AGWGVMTSHR                           |
| 374 - 383   | 1117.52  | 1116.52   | 1116.51   | 0.01  | 0 AGWGVMTSHR Oxidation (M)             |
| 384 - 405   | 2236.15  | 2235.15   | 2235.13   | 0.02  | 0 SGETEDTFIADLAVGLATGQIK               |
| 418 - 423   | 806.48   | 805.48    | 805.44    | 0.04  | 0 YNQLLR                               |
| 424 - 438   | 1491.76  | 1490.76   | 1490.76   | -0.01 | 0 IEEELGAAAVYAGAK                      |
| 439 - 446   | 978.53   | 977.53    | 977.50    | 0.03  | 1 FRAPVEPY                             |

## Spot 1700

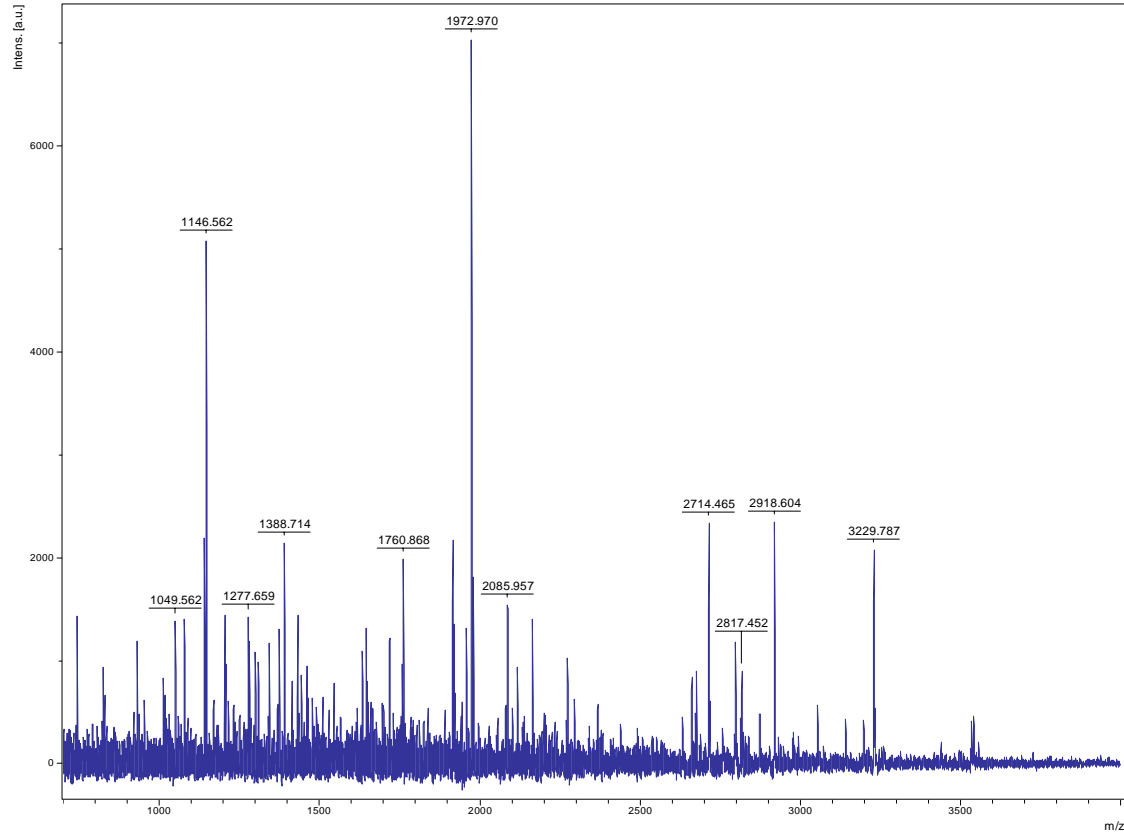

Match to: gi|34897076 Score: 66 Expect: 0.019

### Matched peptides:

| Start - End | Observed  | Mr (expt) | Mr (calc) | Delta   | Miss Sequence                                        |
|-------------|-----------|-----------|-----------|---------|------------------------------------------------------|
| 2 - 19      | 1979.0532 | 1978.0459 | 1978.0166 | 0.0293  | 1 M.REILHIQGGQCGNQIGAK.F Carbamidomethyl (C)         |
| 20 - 35     | 1890.8779 | 1889.8706 | 1889.8366 | 0.0340  | 0 K.FWEVICDEHGVDATGR.Y Carbamidomethyl (C)           |
| 36 - 46     | 1308.6135 | 1307.6062 | 1307.5993 | 0.0069  | 0 R.YAGDSDLQLER.I Acetyl (N-term)                    |
| 36 - 58     | 2632.2865 | 2631.2792 | 2631.2200 | 0.0592  | 1 R.YAGDSDLQLERINVYYNEASGGR.Y Acetyl (N-term)        |
| 47 - 58     | 1342.5925 | 1341.5852 | 1341.6313 | -0.0460 | 0 R.INVYYNEASGGR.Y                                   |
| 63 - 77     | 1633.7871 | 1632.7798 | 1632.7851 | -0.0053 | 0 R.AVLMDLEPGTMDSVR.S                                |
| 104 - 121   | 1973.0054 | 1971.9981 | 1971.9901 | -0.0080 | 0 K.GHYTEGAELIDSVLDVVR.K                             |
| 104 - 122   | 2101.0853 | 2100.0780 | 2100.0851 | -0.0070 | 1 K.GHYTEGAELIDSVLDVVR.K                             |
| 155 - 162   | 1077.4453 | 1076.4380 | 1076.5250 | -0.0870 | 1 K.IREEYPDR.M                                       |
| 242 - 251   | 1146.5367 | 1145.5294 | 1145.5829 | -0.0535 | 0 R.FPGQLNSDLR.K                                     |
| 263 - 276   | 1664.8084 | 1663.8011 | 1663.8544 | -0.0533 | 0 R.LHFFMVGFAPLTSR.G Acetyl (N-term)                 |
| 277 - 297   | 2492.2418 | 2491.2345 | 2491.2165 | 0.0180  | 1 R.GSQYRALTVPQLTQQMWDAK.N Acetyl (N-term)           |
| 283 - 297   | 1730.8512 | 1729.8439 | 1729.8709 | -0.0270 | 0 R.ALTVPQLTQQMWDAK.N                                |
| 298 - 309   | 1431.6198 | 1430.6125 | 1430.5965 | 0.0160  | 1 K.NMCAADPRHGR.Y Carbamidomethyl (C); Oxidation (M) |
| 325 - 350   | 3140.5162 | 3139.5089 | 3139.4920 | 0.0170  | 1 K.EVDEQMLNVQKNSSYFVEWIPNNVK.S Oxidation (M)        |
| 337 - 350   | 1696.8526 | 1695.8453 | 1695.8256 | 0.0197  | 0 K.NSSYFVEWIPNNVK.S                                 |
| 381 - 390   | 1215.5453 | 1214.5380 | 1214.5753 | -0.0373 | 0 R.VSEQFTAMFR.R                                     |
| 381 - 390   | 1231.5906 | 1230.5833 | 1230.5703 | 0.0131  | 0 R.VSEQFTAMFR.R Oxidation (M)                       |

# Spot 1701

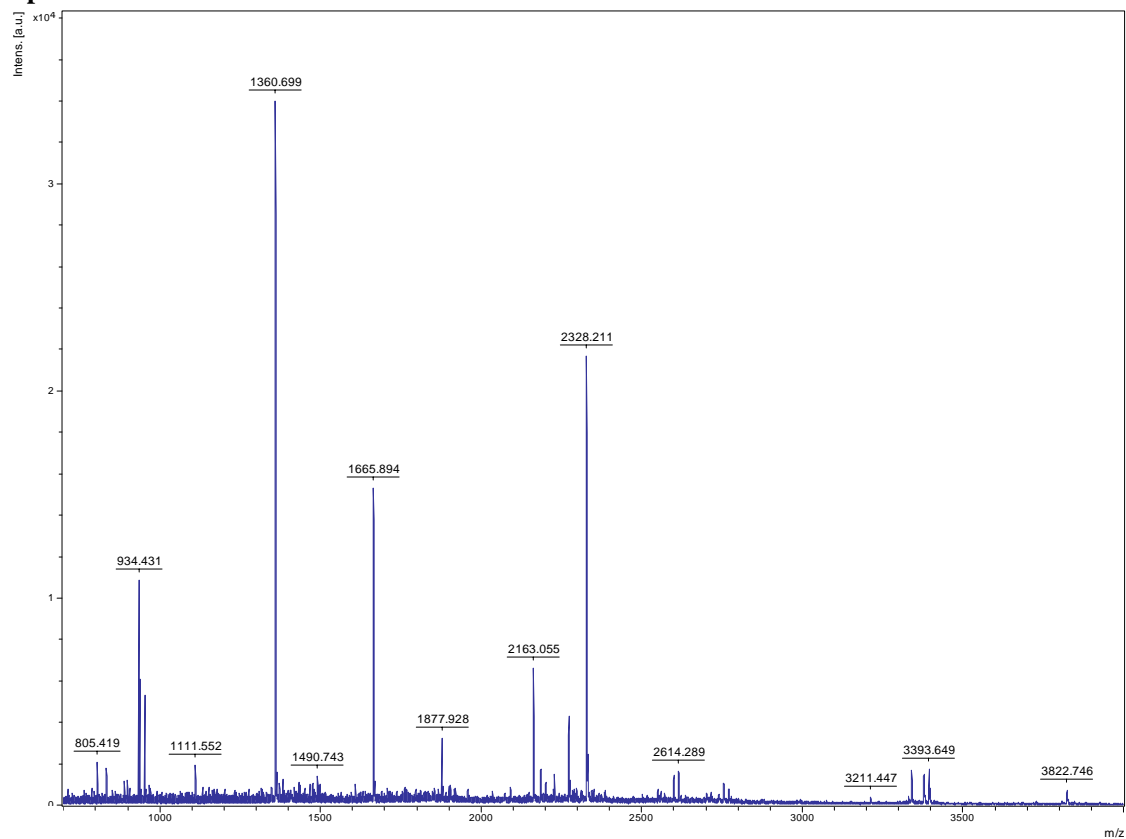

Match to: gi|53793163 Score: 107 Expect: 1.3e-06

## Matched peptides:

| Start - End | Observed  | Mr (expt) | Mr (calc) | Delta   | Miss Sequence                                             |
|-------------|-----------|-----------|-----------|---------|-----------------------------------------------------------|
| 10 - 27     | 1877.9001 | 1876.8928 | 1876.9053 | -0.0125 | 0 K.GTNFEIEASPEASVAEVK.R                                  |
| 10 - 28     | 2033.9920 | 2032.9847 | 2033.0065 | -0.0217 | 1 K.GTNFEIEASPEASVAEVKR.I                                 |
| 28 - 51     | 2754.2751 | 2753.2678 | 2753.3918 | -0.1240 | 1 K.RIIESTQGQNVYPADQQMLIHQGK.I                            |
| 28 - 51     | 2770.2070 | 2769.1997 | 2769.3867 | -0.1870 | 1 K.RIIESTQGQNVYPADQQMLIHQGK.I Oxidation (M)              |
| 29 - 51     | 2598.1612 | 2597.1539 | 2597.2907 | -0.1368 | 0 R.IIESTQGQNVYPADQQMLIHQGK.I                             |
| 29 - 51     | 2614.1747 | 2613.1674 | 2613.2856 | -0.1182 | 0 R.IIESTQGQNVYPADQQMLIHQGK.I Oxidation (M)               |
| 52 - 63     | 1346.6896 | 1345.6823 | 1345.7089 | -0.0266 | 1 K.ILKDDTTLEGNK.V                                        |
| 64 - 76     | 1466.7883 | 1465.7810 | 1465.7850 | -0.0040 | 0 K.VAENSFLVIMLSK.A Oxidation (M)                         |
| 191 - 198   | 934.3620  | 933.3547  | 933.4304  | -0.0757 | 0 R.AAYNNPER.A                                            |
| 199 - 219   | 2328.1149 | 2327.1076 | 2327.1797 | -0.0721 | 0 R.AIDYLYSGIPENVEPPQPVAR.A                               |
| 317 - 334   | 2192.9802 | 2191.9729 | 2192.1702 | -0.1972 | 1 K.QNPQILRLIQENQAEFLR.L Pyro-glu (N-term Q)              |
| 324 - 334   | 1360.6975 | 1359.6902 | 1359.7146 | -0.0244 | 0 R.LIQENQAEFLR.L                                         |
| 335 - 368   | 3377.4028 | 3376.3955 | 3376.6932 | -0.2976 | 0 R.LVNESPSGSAAGGNILGQLAAAMPQALTVTPEER.E                  |
| 335 - 368   | 3393.3914 | 3392.3841 | 3392.6881 | -0.3040 | 0 R.LVNESPSGSAAGGNILGQLAAAMPQALTVTPEER.E Oxidation (M)    |
| 374 - 381   | 937.3896  | 936.3823  | 936.4487  | -0.0664 | 0 R.LEAMGFNR.E                                            |
| 374 - 381   | 953.3958  | 952.3885  | 952.4436  | -0.0551 | 0 R.LEAMGFNR.E Oxidation (M)                              |
| 382 - 413   | 3822.5404 | 3821.5331 | 3821.7518 | -0.2187 | 1 R.ELVLEVFACNKDEELAANYLLDHGHEFEDQQ.- Carbamidomethyl (C) |

## Spot 1703

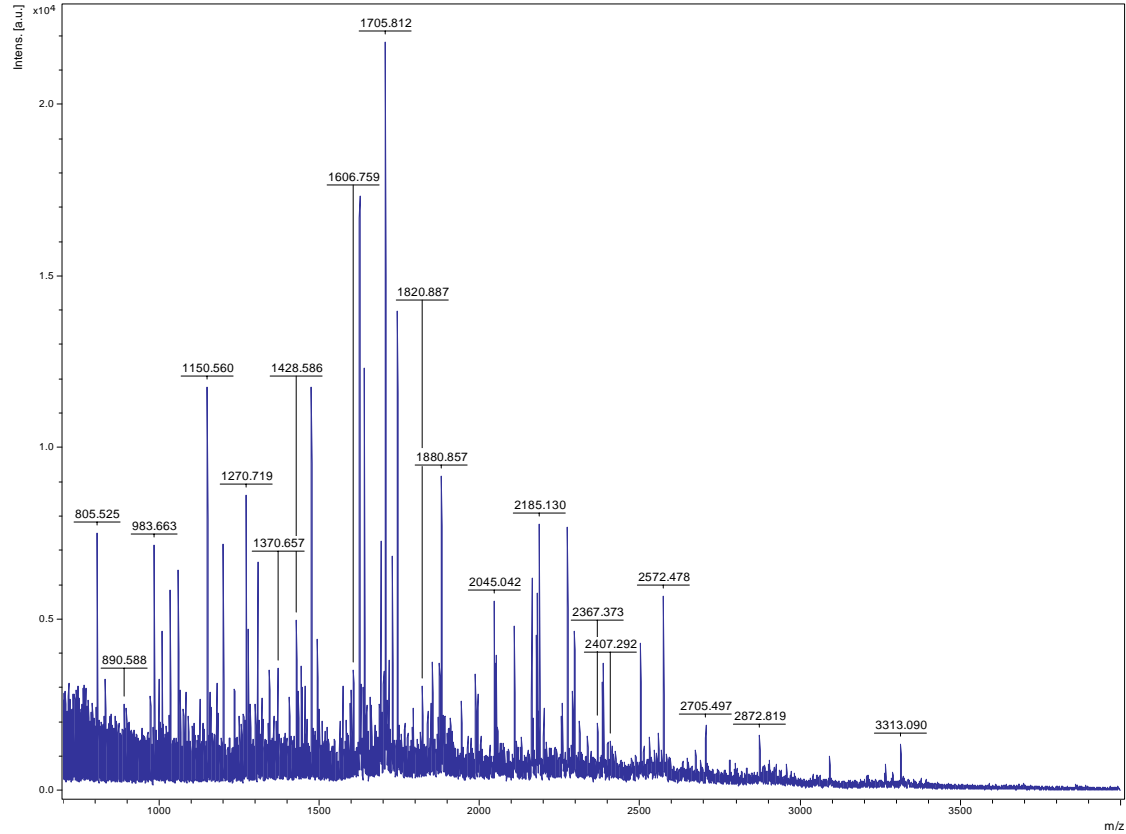

Match to: gi|50582723; Score: 180

### Matched peptides:

| Start - End | Observed | Mr (expt) | Mr (calc) | Delta | Miss Sequence                  |
|-------------|----------|-----------|-----------|-------|--------------------------------|
| 8 - 31      | 2407.29  | 2406.29   | 2406.27   | -0.02 | 1 VAAPASVAAAARCGTSLARPWPAR     |
| 77 - 90     | 1270.72  | 1269.72   | 1269.74   | -0.02 | 0 TVVAVILGGGAGTR               |
| 99 - 110    | 1199.68  | 1198.67   | 1198.68   | -0.01 | 0 AKPAVPIGGAYR                 |
| 127 - 140   | 1625.82  | 1624.81   | 1624.86   | -0.04 | 0 VYILTQFNSASLNR               |
| 175 - 184   | 1150.56  | 1149.56   | 1149.56   | 0.00  | 0 WFQGTADAVR                   |
| 185 - 194   | 1284.60  | 1283.60   | 1283.58   | 0.02  | 0 QFDWLFDDAK                   |
| 195 - 211   | 1943.01  | 1942.01   | 1942.02   | -0.01 | 1 AKDIDDVILISGDHLYR            |
| 197 - 211   | 1743.85  | 1742.85   | 1742.88   | -0.03 | 0 DIDDVILISGDHLYR              |
| 212 - 222   | 1428.59  | 1427.58   | 1427.60   | -0.01 | 0 MDYMDVFQSHR                  |
| 212 - 222   | 1444.60  | 1443.60   | 1443.59   | 0.01  | 0 MDYMDVFQSHR Oxidation (M)    |
| 212 - 222   | 1460.64  | 1459.63   | 1459.59   | 0.05  | 0 MDYMDVFQSHR 2 Oxidation (M)  |
| 225 - 239   | 1691.75  | 1690.75   | 1690.77   | -0.01 | 0 GADISICCLPIDDSR              |
| 300 - 307   | 983.66   | 982.66    | 982.62    | 0.04  | 0 EILLNLLR                     |
| 308 - 326   | 2107.09  | 2106.09   | 2106.05   | 0.03  | 1 WRFPTANDFGSEIIPASAK          |
| 332 - 346   | 1847.88  | 1846.88   | 1846.88   | 0.00  | 0 AYLFN DYWEDIGTIK             |
| 347 - 361   | 1705.81  | 1704.81   | 1704.85   | -0.04 | 0 SFFEANLSLAEQPPR              |
| 362 - 375   | 1726.76  | 1725.76   | 1725.78   | -0.03 | 0 FSFYDANKPMYTSR               |
| 362 - 375   | 1742.78  | 1741.78   | 1741.78   | 0.00  | 0 FSFYDANKPMYTSR Oxidation (M) |
| 376 - 387   | 1370.66  | 1369.66   | 1369.71   | -0.06 | 1 RNLPPSMINNSK                 |
| 388 - 403   | 1880.86  | 1879.85   | 1879.86   | -0.00 | 0 ITDSIISHGCFLDSCR             |
| 404 - 412   | 1009.60  | 1008.60   | 1008.57   | 0.03  | 0 IEHSVVGIR                    |
| 423 - 438   | 1874.90  | 1873.89   | 1873.84   | 0.05  | 0 DTVMLGADFYETDLER             |
| 457 - 467   | 1344.67  | 1343.67   | 1343.70   | -0.03 | 1 IQNCIHKNAR                   |
| 471 - 493   | 2572.48  | 2571.48   | 2571.22   | 0.26  | 1 NVTISNSEGVQEADRTSEGFYIR      |
| 486 - 493   | 972.56   | 971.55    | 971.47    | 0.08  | 0 TSEGFYIR                     |

## Spot 1707

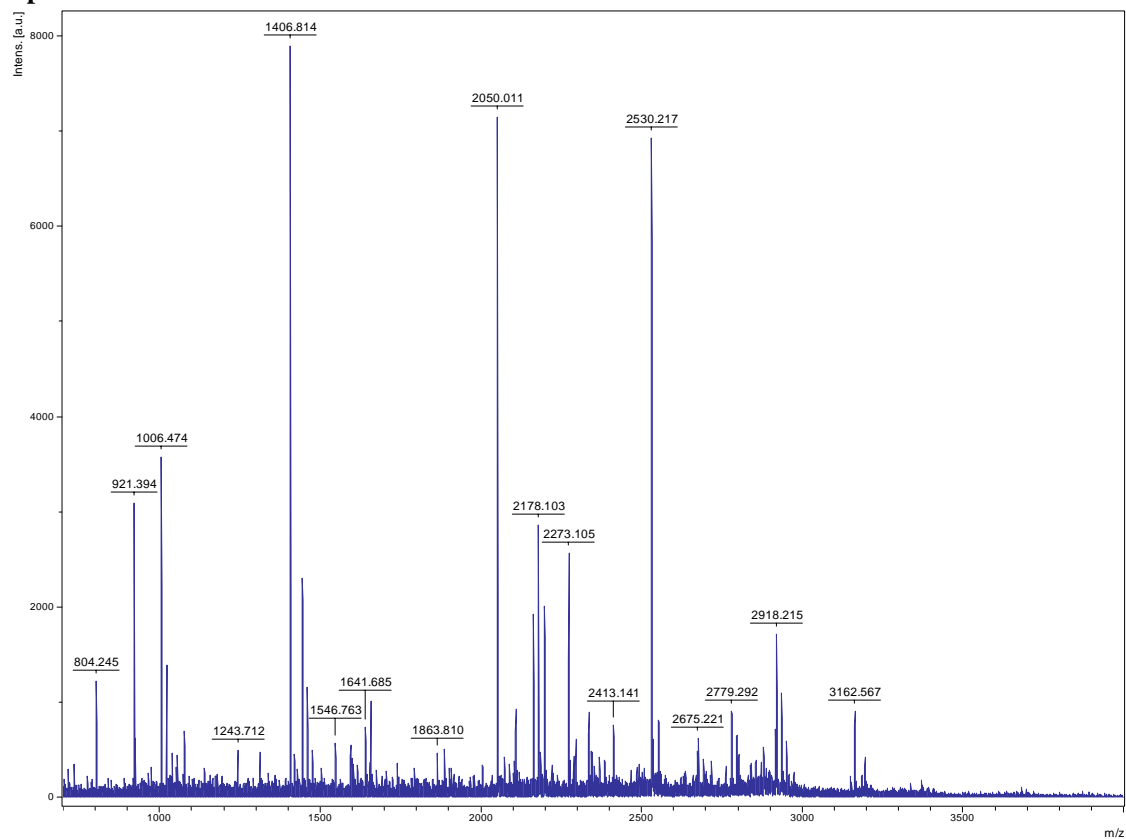

Match to: gi|50878307; Score: 123

### Matched peptides:

| Start - End | Observed | Mr (expt) | Mr (calc) | Delta | Miss Sequence                              |
|-------------|----------|-----------|-----------|-------|--------------------------------------------|
| 156 - 168   | 1406.81  | 1405.81   | 1405.84   | -0.03 | 0 LGDPARPLLSVR                             |
| 203 - 209   | 921.39   | 920.39    | 920.40    | -0.01 | 0 FAYDSYR                                  |
| 203 - 210   | 1077.50  | 1076.50   | 1076.50   | -0.01 | 1 FAYDSYRR                                 |
| 239 - 259   | 2345.15  | 2344.15   | 2344.19   | -0.04 | 1 GLHNDTDLTATDLKELVAQYK                    |
| 276 - 293   | 2071.98  | 2070.97   | 2071.12   | -0.15 | 1 KQLQLAVLAVFNSWDSR                        |
| 308 - 333   | 2675.22  | 2674.22   | 2674.28   | -0.07 | 0 GTAVNVQTMVFGNMGNTSGTGLFTR Oxidation (M)  |
| 341 - 360   | 2178.10  | 2177.10   | 2177.15   | -0.05 | 1 KLYGEFLVNAQGEDVVAGIR                     |
| 342 - 360   | 2050.01  | 2049.01   | 2049.05   | -0.04 | 0 LYGEFLVNAQGEDVVAGIR                      |
| 361 - 384   | 2918.22  | 2917.21   | 2917.26   | -0.04 | 1 TPEDLDAMRDHMPEPYEELVENCK                 |
| 361 - 384   | 2934.21  | 2933.21   | 2933.25   | -0.04 | 1 TPEDLDAMRDHMPEPYEELVENCK Oxidation (M)   |
| 361 - 384   | 2950.25  | 2949.25   | 2949.25   | -0.00 | 1 TPEDLDAMRDHMPEPYEELVENCK 2 Oxidation (M) |
| 392 - 404   | 1641.69  | 1640.68   | 1640.72   | -0.03 | 0 EMMDIEFTVQENR                            |
| 405 - 411   | 1006.47  | 1005.47   | 1005.49   | -0.02 | 0 LWMLQCR                                  |
| 405 - 411   | 1022.47  | 1021.47   | 1021.48   | -0.01 | 0 LWMLQCR Oxidation (M)                    |
| 423 - 435   | 1444.71  | 1443.70   | 1443.74   | -0.03 | 0 IAVDMVNEGLVER                            |
| 423 - 435   | 1460.72  | 1459.72   | 1459.73   | -0.02 | 0 IAVDMVNEGLVER Oxidation (M)              |
| 441 - 462   | 2552.17  | 2551.17   | 2551.22   | -0.05 | 0 MVEPGHLDQLLHPQFENPSGYK Oxidation (M)     |
| 441 - 464   | 2779.29  | 2778.29   | 2778.34   | -0.05 | 1 MVEPGHLDQLLHPQFENPSGYKDK                 |
| 441 - 464   | 2795.29  | 2794.28   | 2794.34   | -0.05 | 1 MVEPGHLDQLLHPQFENPSGYKDK Oxidation (M)   |
| 465 - 496   | 3162.57  | 3161.56   | 3161.61   | -0.05 | 0 VIATGLPASPGAAVGQIVFTAEDAEAWHAQGK         |
| 524 - 539   | 1600.81  | 1599.80   | 1599.79   | 0.01  | 1 GGMTSHAAVVARGWGK Oxidation (M)           |

## Spot 1709

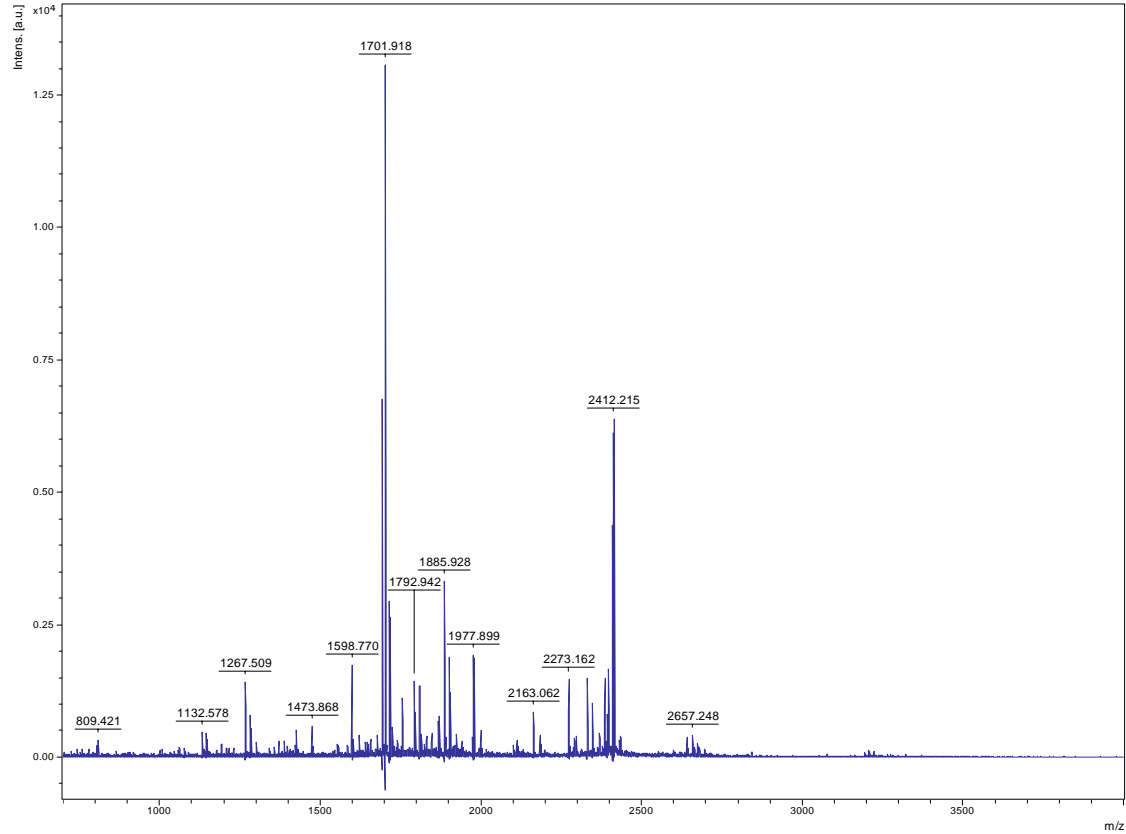

Match to: gj|10441016; Score: 172

### Matched peptides:

| Start - End | Observed | Mr (expt) | Mr (calc) | Delta | Miss Sequence                              |
|-------------|----------|-----------|-----------|-------|--------------------------------------------|
| 41 - 60     | 1977.89  | 1976.88   | 1976.88   | 0.01  | 0 TVGGGDDAFNTFFSETGAGK                     |
| 65 - 79     | 1701.91  | 1700.90   | 1700.90   | 0.00  | 0 AVFVDLEPTVIDEVR                          |
| 85 - 105    | 2412.19  | 2411.19   | 2411.20   | -0.01 | 1 QLFHPPEQLNGKEDAANNFAR                    |
| 113 - 121   | 1132.57  | 1131.57   | 1131.56   | 0.01  | 0 EIVDLCLDR                                |
| 215 - 229   | 1847.96  | 1846.95   | 1846.96   | -0.01 | 1 RSLDIERPTYTNLNR                          |
| 216 - 229   | 1691.87  | 1690.87   | 1690.86   | 0.00  | 0 SLDIERPTYTNLNR                           |
| 230 - 243   | 1473.87  | 1472.87   | 1472.86   | 0.01  | 0 LVSQVSSLTASLR                            |
| 265 - 280   | 1792.93  | 1791.93   | 1791.92   | 0.00  | 0 IHFMLSSYAPVISA EK                        |
| 265 - 280   | 1808.92  | 1807.91   | 1807.92   | -0.00 | 0 IHFMLSSYAPVISA EK Oxidation (M)          |
| 281 - 304   | 2641.21  | 2640.20   | 2640.22   | -0.02 | 0 AYHEQLSVAEITNSAFEPSSMMAK                 |
| 281 - 304   | 2657.23  | 2656.22   | 2656.21   | 0.01  | 0 AYHEQLSVAEITNSAFEPSSMMAK Oxidation (M)   |
| 281 - 304   | 2673.21  | 2672.21   | 2672.21   | -0.00 | 0 AYHEQLSVAEITNSAFEPSSMMAK 2 Oxidation (M) |
| 312 - 320   | 1267.51  | 1266.50   | 1266.50   | 0.00  | 0 YMACCLMYR                                |
| 312 - 320   | 1283.50  | 1282.50   | 1282.50   | 0.00  | 0 YMACCLMYR Oxidation (M)                  |
| 312 - 320   | 1299.50  | 1298.50   | 1298.49   | 0.01  | 0 YMACCLMYR 2 Oxidation (M)                |
| 339 - 352   | 1754.87  | 1753.86   | 1753.86   | 0.00  | 1 RTIQFVDWCPTGFK                           |
| 340 - 352   | 1598.76  | 1597.75   | 1597.76   | -0.01 | 0 TIQFVDWCPTGFK                            |
| 353 - 370   | 1901.92  | 1900.92   | 1900.94   | -0.01 | 0 CGINYQPPSVVPSGDLAK                       |
| 374 - 390   | 1885.92  | 1884.91   | 1884.91   | 0.01  | 0 AVCMISNSTSVVEVFSR                        |
| 374 - 394   | 2395.15  | 2394.15   | 2394.17   | -0.02 | 1 AVCMISNSTSVVEVFSRIDHK Oxidation (M)      |
| 403 - 422   | 2330.01  | 2329.00   | 2329.01   | -0.01 | 0 AFVHWYVGEEMEEGFSEAR                      |
| 403 - 422   | 2346.01  | 2345.01   | 2345.01   | 0.00  | 0 AFVHWYVGEEMEEGFSEAR Oxidation (M)        |



## Spot 1710

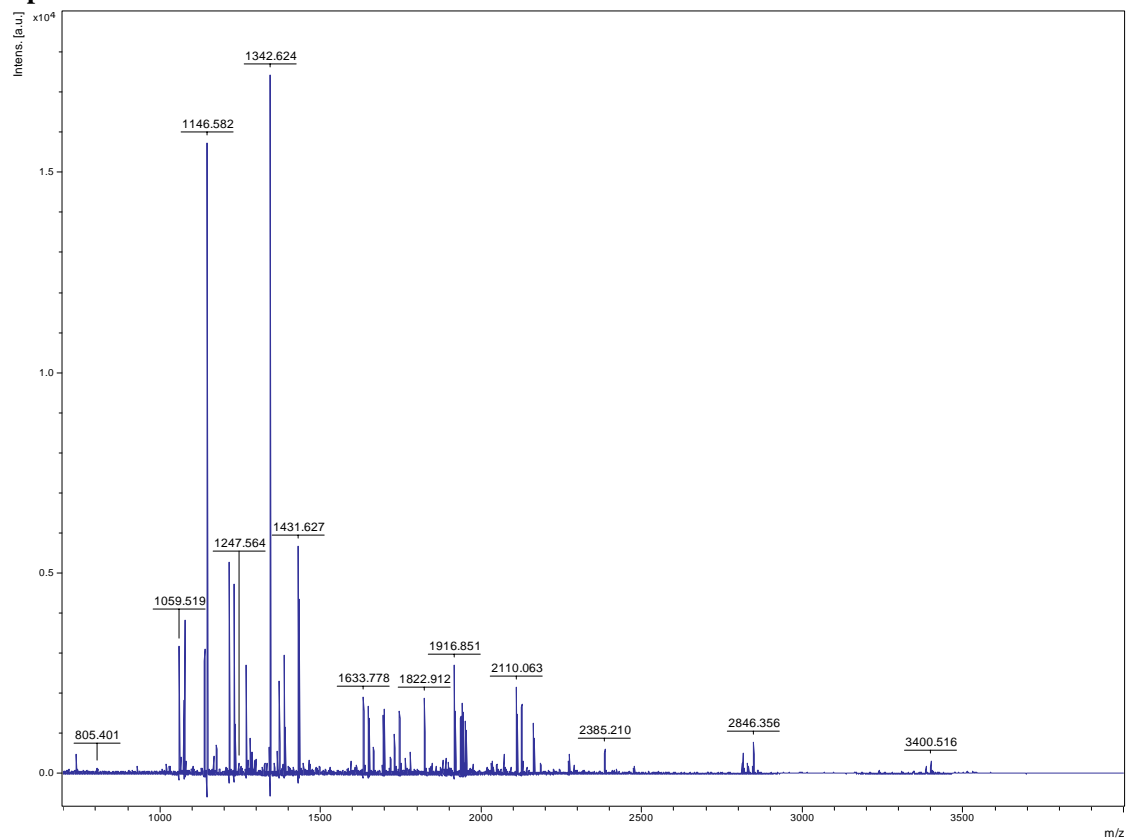

Match to: gi|74053562; Score: 224

### Matched peptides:

| Start - End | Observed | Mr (expt) | Mr (calc) | Delta | Miss Sequence                       |
|-------------|----------|-----------|-----------|-------|-------------------------------------|
| 1 - 19      | 2110.06  | 2109.05   | 2109.06   | -0.00 | 1 MREILHIQGGQCGNQIGAK               |
| 1 - 19      | 2126.05  | 2125.04   | 2125.05   | -0.01 | 1 MREILHIQGGQCGNQIGAK Oxidation (M) |
| 3 - 19      | 1822.91  | 1821.90   | 1821.92   | -0.01 | 0 EILHIQGGQCGNQIGAK                 |
| 20 - 35     | 1942.86  | 1941.86   | 1941.87   | -0.01 | 0 FWEVICDEHGIDHTGK                  |
| 36 - 46     | 1282.59  | 1281.59   | 1281.58   | 0.00  | 0 YSGDSDLQLER                       |
| 47 - 58     | 1342.62  | 1341.61   | 1341.63   | -0.02 | 0 INVYYNEASGGR                      |
| 63 - 77     | 1633.77  | 1632.77   | 1632.79   | -0.02 | 0 AVLMDLPEPTMDSVR                   |
| 63 - 77     | 1649.76  | 1648.76   | 1648.78   | -0.02 | 0 AVLMDLPEPTMDSVR Oxidation (M)     |
| 63 - 77     | 1665.77  | 1664.77   | 1664.77   | -0.00 | 0 AVLMDLPEPTMDSVR 2 Oxidation (M)   |
| 78 - 103    | 2814.33  | 2813.33   | 2813.33   | 0.00  | 0 SGPYGQIFRPDNFVFGQSGAGNNWAK        |
| 155 - 162   | 1077.51  | 1076.51   | 1076.53   | -0.02 | 1 IREEYPDR                          |
| 242 - 251   | 1146.57  | 1145.57   | 1145.58   | -0.01 | 0 FPGQLNSDLR                        |
| 242 - 252   | 1274.63  | 1273.63   | 1273.68   | -0.05 | 1 FPGQLNSDLRK                       |
| 252 - 262   | 1267.76  | 1266.76   | 1266.78   | -0.02 | 1 KLAVNLIPIFPR                      |
| 253 - 262   | 1139.67  | 1138.67   | 1138.69   | -0.01 | 0 LAVNLIPIFPR                       |
| 283 - 297   | 1730.86  | 1729.86   | 1729.87   | -0.01 | 0 ALTVPELTQQMWDAK                   |
| 283 - 297   | 1746.86  | 1745.85   | 1745.87   | -0.01 | 0 ALTVPELTQQMWDAK Oxidation (M)     |
| 298 - 306   | 1065.39  | 1064.39   | 1064.42   | -0.03 | 0 NMMCAADPR                         |
| 298 - 309   | 1431.62  | 1430.61   | 1430.60   | 0.02  | 1 NMMCAADPRHGR Oxidation (M)        |
| 310 - 318   | 1059.51  | 1058.51   | 1058.52   | -0.01 | 0 YLTASAMFR                         |
| 310 - 318   | 1075.51  | 1074.50   | 1074.52   | -0.01 | 0 YLTASAMFR Oxidation (M)           |
| 337 - 350   | 1696.80  | 1695.80   | 1695.83   | -0.02 | 0 NSSYFVEWIPNNVK                    |
| 351 - 362   | 1285.64  | 1284.63   | 1284.67   | -0.04 | 0 SSVCDIPIGLK                       |
| 363 - 379   | 1935.88  | 1934.87   | 1934.89   | -0.01 | 0 MASTFIGNSTSIQEMFR Oxidation (M)   |
| 363 - 379   | 1951.87  | 1950.87   | 1950.88   | -0.02 | 0 MASTFIGNSTSIQEMFR 2 Oxidation (M) |
| 381 - 390   | 1215.56  | 1214.56   | 1214.58   | -0.01 | 0 VSEQFTAMFR                        |
| 381 - 390   | 1231.56  | 1230.55   | 1230.57   | -0.02 | 0 VSEQFTAMFR Oxidation (M)          |
| 381 - 391   | 1371.67  | 1370.66   | 1370.68   | -0.01 | 1 VSEQFTAMFR                        |
| 381 - 391   | 1387.66  | 1386.66   | 1386.67   | -0.01 | 1 VSEQFTAMFR Oxidation (M)          |

## Spot 1712

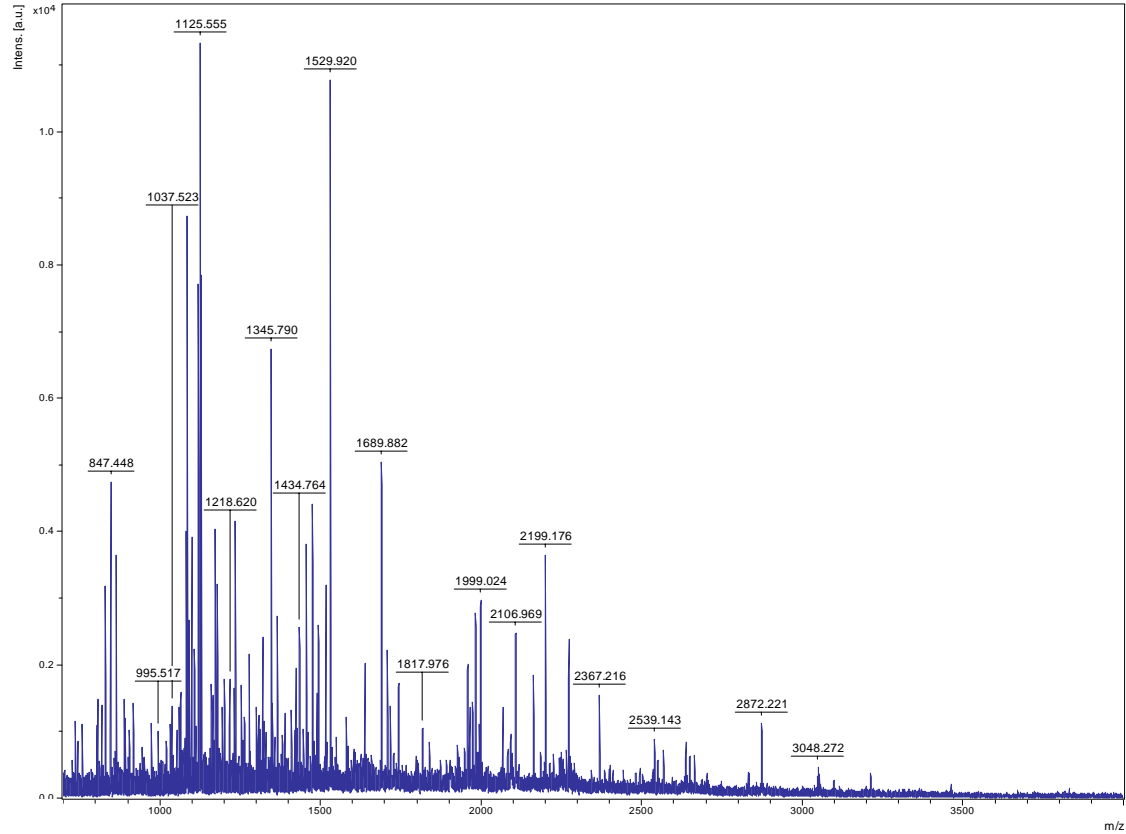

Match to: gi|55296661 Score: 95 Expect: 2.2e-05

### Matched peptides:

| Start - End | Observed  | Mr (expt) | Mr (calc) | Delta   | Miss Sequence                      |
|-------------|-----------|-----------|-----------|---------|------------------------------------|
| 2 - 16      | 1421.7898 | 1420.7825 | 1420.7674 | 0.0152  | 0 M.APPPAVLSSGELGAR.G              |
| 80 - 102    | 2637.3185 | 2636.3112 | 2636.3274 | -0.0162 | 1 R.RLDFLLPFDASEFPGGDPFLLR.W       |
| 109 - 123   | 1529.9473 | 1528.9400 | 1528.9089 | 0.0311  | 0 R.SLHLLGPVIAGVTPR.V              |
| 124 - 142   | 1965.1490 | 1964.1417 | 1964.0942 | 0.0475  | 0 R.VTATVTDVTLVSHVNPAAK.D          |
| 173 - 187   | 1455.7357 | 1454.7284 | 1454.7001 | 0.0284  | 0 K.DAGADVGDVDIPGVR.R              |
| 191 - 203   | 1579.9435 | 1578.9362 | 1578.8882 | 0.0480  | 1 K.RSWLPQPLLDLNK.L                |
| 192 - 203   | 1423.8269 | 1422.8196 | 1422.7871 | 0.0325  | 0 R.SWLPQPLLDLNK.L                 |
| 208 - 218   | 1350.7433 | 1349.7360 | 1349.6761 | 0.0599  | 1 K.QFIENGREVMVK.T                 |
| 219 - 239   | 2199.2385 | 2198.2312 | 2198.1946 | 0.0366  | 0 K.TDGLINTFDALPEVALAALR.D         |
| 246 - 265   | 1999.0699 | 1998.0626 | 1998.0210 | 0.0416  | 0 R.GFPPVFVAVGPHSSLASEATK.G        |
| 266 - 285   | 2083.0910 | 2082.0837 | 2082.0064 | 0.0773  | 1 K.GAAADAEGSPMAWLRQQPAR.S         |
| 286 - 295   | 1084.5307 | 1083.5234 | 1083.5712 | -0.0478 | 0 R.SVYVAVFGSR.C                   |
| 296 - 304   | 1099.4878 | 1098.4805 | 1098.5240 | -0.0435 | 0 R.CAVSHEQIRE Carbamidomethyl (C) |
| 305 - 316   | 1160.5789 | 1159.5716 | 1159.5833 | -0.0116 | 0 R.EIAAGLEASGSR.F                 |
| 336 - 345   | 1120.5303 | 1119.5230 | 1119.5560 | -0.0330 | 0 R.DVLGDGFLEK.V                   |
| 355 - 364   | 1172.5951 | 1171.5878 | 1171.5985 | -0.0107 | 0 K.AWVDQDAVLR.D                   |
| 459 - 476   | 1742.9845 | 1741.9772 | 1741.9362 | 0.0410  | 0 K.AVAVGGTSHTGILDFVAK.L           |

### Spot 1715

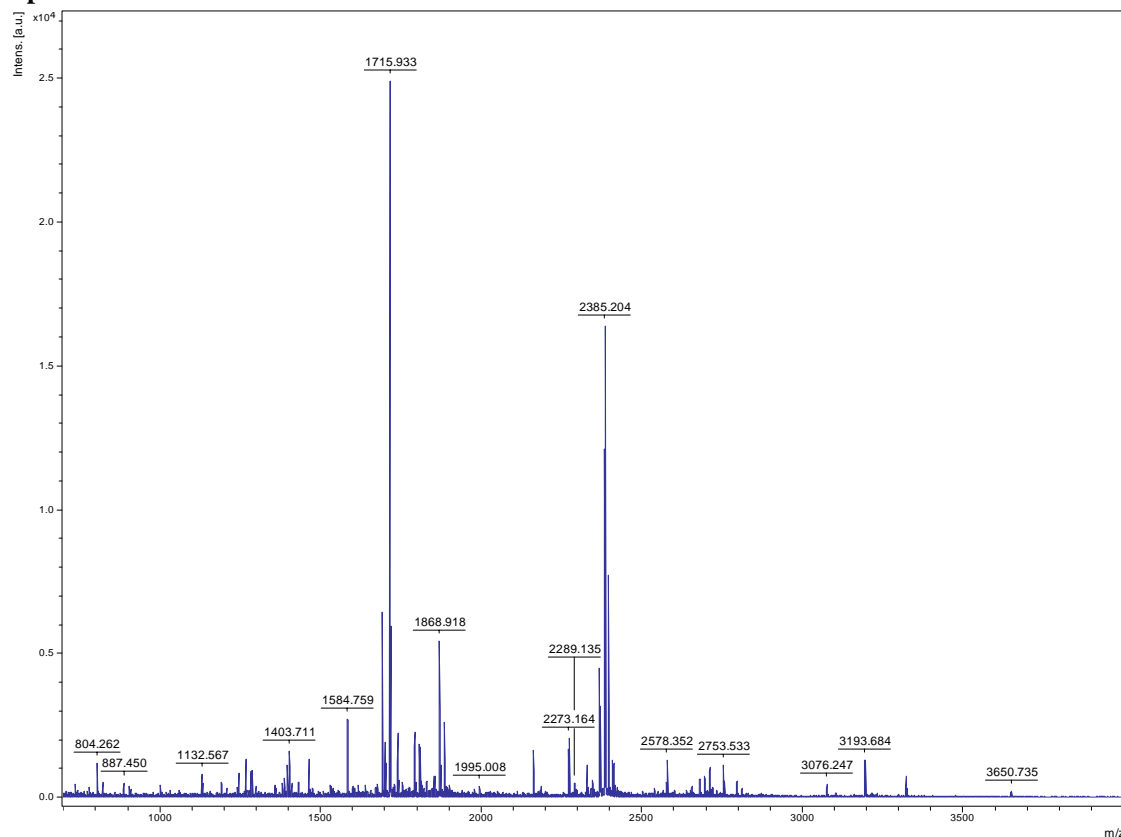

Match to: gi|135399; Score: 271

#### Matched peptides:

| Start - End | Observed | Mr (expt) | Mr (calc) | Delta | Miss Sequence                               |
|-------------|----------|-----------|-----------|-------|---------------------------------------------|
| 65 - 79     | 1715.93  | 1714.93   | 1714.91   | 0.02  | 0 AIFVDLEPTVIDEVR                           |
| 85 - 96     | 1396.74  | 1395.74   | 1395.75   | -0.01 | 0 QLFHPEQLISGK                              |
| 85 - 105    | 2368.17  | 2367.17   | 2367.16   | 0.01  | 1 QLFHPEQLISGKEDAANNFAR Pyro-glu (N-term Q) |
| 85 - 105    | 2385.20  | 2384.20   | 2384.19   | 0.01  | 1 QLFHPEQLISGKEDAANNFAR                     |
| 106 - 121   | 1874.95  | 1873.95   | 1873.94   | 0.02  | 1 GHYTVGKEIVDLCLDR                          |
| 113 - 121   | 1132.57  | 1131.56   | 1131.56   | 0.00  | 0 EIVDLCLDR                                 |
| 113 - 123   | 1387.74  | 1386.74   | 1386.73   | 0.01  | 1 EIVDLCLDRVR                               |
| 124 - 156   | 3321.76  | 3320.76   | 3320.72   | 0.04  | 1 KLADNCTGLQGFLVFNVAVGGGTGSGLSLLLER         |
| 125 - 156   | 3193.68  | 3192.68   | 3192.62   | 0.06  | 0 LADNCTGLQGFLVFNVAVGGGTGSGLSLLLER          |
| 216 - 229   | 1691.88  | 1690.88   | 1690.86   | 0.02  | 0 SLDIERPTYTLNR                             |
| 230 - 243   | 1531.89  | 1530.88   | 1530.90   | -0.01 | 0 LISQISSLTSLR                              |
| 244 - 264   | 2395.21  | 2394.21   | 2394.19   | 0.03  | 0 FDGAINVDVTEFQTNLVPPYR                     |
| 265 - 280   | 1792.93  | 1791.93   | 1791.92   | 0.01  | 0 IHFMLSSYAPVISA EK                         |
| 265 - 280   | 1808.94  | 1807.93   | 1807.92   | 0.02  | 0 IHFMLSSYAPVISA EK Oxidation (M)           |
| 281 - 304   | 2679.29  | 2678.29   | 2678.27   | 0.02  | 0 AYHEQLSVPEITNAVFEPPSSMMAK                 |
| 281 - 304   | 2695.29  | 2694.28   | 2694.27   | 0.02  | 0 AYHEQLSVPEITNAVFEPPSSMMAK Oxidation (M)   |
| 281 - 304   | 2711.30  | 2710.30   | 2710.26   | 0.03  | 0 AYHEQLSVPEITNAVFEPPSSMMAK 2 Oxidation (M) |
| 312 - 320   | 1267.51  | 1266.50   | 1266.50   | 0.00  | 0 YMACCLMYR                                 |
| 312 - 320   | 1283.50  | 1282.49   | 1282.50   | -0.00 | 0 YMACCLMYR Oxidation (M)                   |
| 312 - 320   | 1299.48  | 1298.48   | 1298.49   | -0.01 | 0 YMACCLMYR 2 Oxidation (M)                 |
| 327 - 336   | 1001.57  | 1000.57   | 1000.56   | 0.02  | 0 DVNAAVATIK                                |
| 339 - 352   | 1740.87  | 1739.87   | 1739.85   | 0.02  | 1 RTVQFVDWCPTGFK                            |
| 340 - 352   | 1584.76  | 1583.76   | 1583.74   | 0.01  | 0 TVQFVDWCPTGFK                             |
| 353 - 370   | 1871.95  | 1870.95   | 1870.92   | 0.02  | 0 CGINYQPPSVVPGDLAK                         |
| 374 - 390   | 1868.92  | 1867.92   | 1867.89   | 0.02  | 0 AVCMISNNTAVAEVFSR                         |
| 374 - 390   | 1884.91  | 1883.91   | 1883.89   | 0.02  | 0 AVCMISNNTAVAEVFSR Oxidation (M)           |
| 391 - 401   | 1380.70  | 1379.70   | 1379.69   | 0.01  | 1 IDHKFDLMYAK                               |
| 395 - 401   | 887.45   | 886.45    | 886.43    | 0.02  | 0 FDLMYAK                                   |
| 395 - 401   | 903.42   | 902.42    | 902.42    | -0.00 | 0 FDLMYAK Oxidation (M)                     |
| 403 - 422   | 2330.02  | 2329.02   | 2329.01   | 0.00  | 0 AFVHWYVYVGGEMEEGEFSEAR                    |
| 403 - 422   | 2346.02  | 2345.02   | 2345.01   | 0.01  | 0 AFVHWYVYVGGEMEEGEFSEAR Oxidation (M)      |
| 423 - 450   | 3076.25  | 3075.24   | 3075.21   | 0.03  | 1 EDLAALEKDYEEVGAEGADDENDDGEDY              |

Match to: gi|34912654; Score: 102

#### Matched peptides:

| Start - End | Observed | Mr (expt) | Mr (calc) | Delta | Miss Sequence                    |
|-------------|----------|-----------|-----------|-------|----------------------------------|
| 9 - 37      | 2753.53  | 2752.53   | 2752.51   | 0.02  | 1 SPPALVPPAGPTPGGSLPLSSIDKTA AVR |
| 38 - 64     | 2795.43  | 2794.43   | 2794.40   | 0.03  | 1 VSVDFIQVFPSSAEAAKDQAASVAAMR    |
| 70 - 80     | 1245.68  | 1244.68   | 1244.67   | 0.01  | 0 ALVHYYPVAGR                    |
| 124 - 135   | 1431.79  | 1430.79   | 1430.79   | -0.00 | 0 EELLRPPPEVVR                   |
| 182 - 194   | 1463.84  | 1462.84   | 1462.83   | 0.01  | 0 GLPEPSLKP IWAR                 |
| 195 - 218   | 2578.35  | 2577.35   | 2577.33   | 0.02  | 0 DAIPNPPKPLGPPSPSFTAFNFEK       |
| 219 - 230   | 1359.77  | 1358.76   | 1358.78   | -0.01 | 1 SVIEISLDSIKR                   |
| 258 - 270   | 1403.71  | 1402.71   | 1402.71   | -0.00 | 0 TLAI DFAPDADVR                 |
| 271 - 278   | 822.45   | 821.45    | 821.44    | 0.01  | 0 LGFAASTR                       |
| 310 - 321   | 1286.73  | 1285.73   | 1285.72   | 0.01  | 0 DASLVEIVTAIR                   |
| 403 - 414   | 1411.73  | 1410.73   | 1410.73   | 0.00  | 0 LVLQCV EAQHSK                  |

### Spot 1718

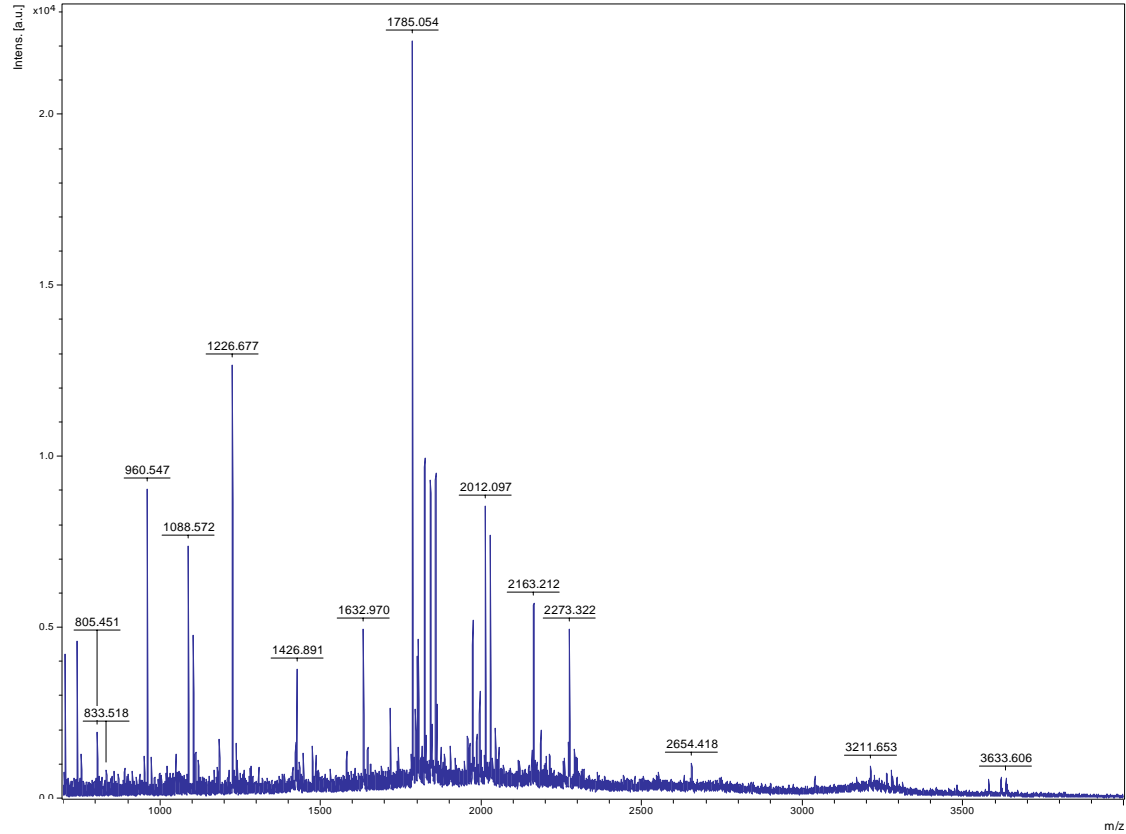

Match to: gi|34900784 Score: 115 Expect: 2.1e-07

#### Matched peptides:

| Start - End | Observed  | Mr (expt) | Mr (calc) | Delta   | Miss Sequence                                                             |
|-------------|-----------|-----------|-----------|---------|---------------------------------------------------------------------------|
| 45 - 53     | 1088.5407 | 1087.5334 | 1087.5120 | 0.0214  | 0 R.EPGMAEWLR.G                                                           |
| 45 - 53     | 1104.5369 | 1103.5296 | 1103.5069 | 0.0227  | 0 R.EPGMAEWLR.G Oxidation (M)                                             |
| 59 - 71     | 1632.8987 | 1631.8914 | 1631.8532 | 0.0383  | 1 R.IHRHPELAFEEVR.T                                                       |
| 62 - 71     | 1226.6356 | 1225.6283 | 1225.6091 | 0.0192  | 0 R.HPELAFEEVR.T                                                          |
| 72 - 77     | 704.3243  | 703.3170  | 703.3864  | -0.0694 | 0 R.TSELV.R.A                                                             |
| 78 - 93     | 1784.9557 | 1783.9484 | 1783.9257 | 0.0228  | 0 R.AELDAIGVPYQWPV.R.T                                                    |
| 94 - 114    | 1824.0163 | 1823.0090 | 1822.9900 | 0.0190  | 0 R.TGVVATIAGGGGGDPVVAL.R.A                                               |
| 115 - 131   | 1995.9501 | 1994.9428 | 1994.9407 | 0.0021  | 0 R.ADMDALPVQELVDWEHK.S                                                   |
| 263 - 278   | 1715.9723 | 1714.9650 | 1714.9505 | 0.0146  | 0 R.EIDPLQGAVVSTIFVK.G                                                    |
| 279 - 297   | 2011.9656 | 2010.9583 | 2010.9468 | 0.0115  | 0 K.GGEAYNVIPQSVFEGGTMR.S                                                 |
| 279 - 297   | 2027.9596 | 2026.9523 | 2026.9417 | 0.0106  | 0 K.GGEAYNVIPQSVFEGGTMR.S Oxidation (M)                                   |
| 322 - 350   | 3277.1772 | 3276.1699 | 3276.3732 | -0.2032 | 0 R.CGGGVDFMEESMRPYPVAVVNDEGMYAHAR.A Carbamidomethyl (C); 2 Oxidation (M) |
| 356 - 363   | 742.3911  | 741.3838  | 741.4497  | -0.0658 | 0 R.LLGAGGVR.V                                                            |
| 364 - 380   | 1842.8969 | 1841.8896 | 1841.8770 | 0.0127  | 0 R.VAPQLMGAEDFGFYAAR.M                                                   |
| 364 - 380   | 1858.9146 | 1857.9073 | 1857.8719 | 0.0354  | 0 R.VAPQLMGAEDFGFYAAR.M Oxidation (M)                                     |

## Spot 1720

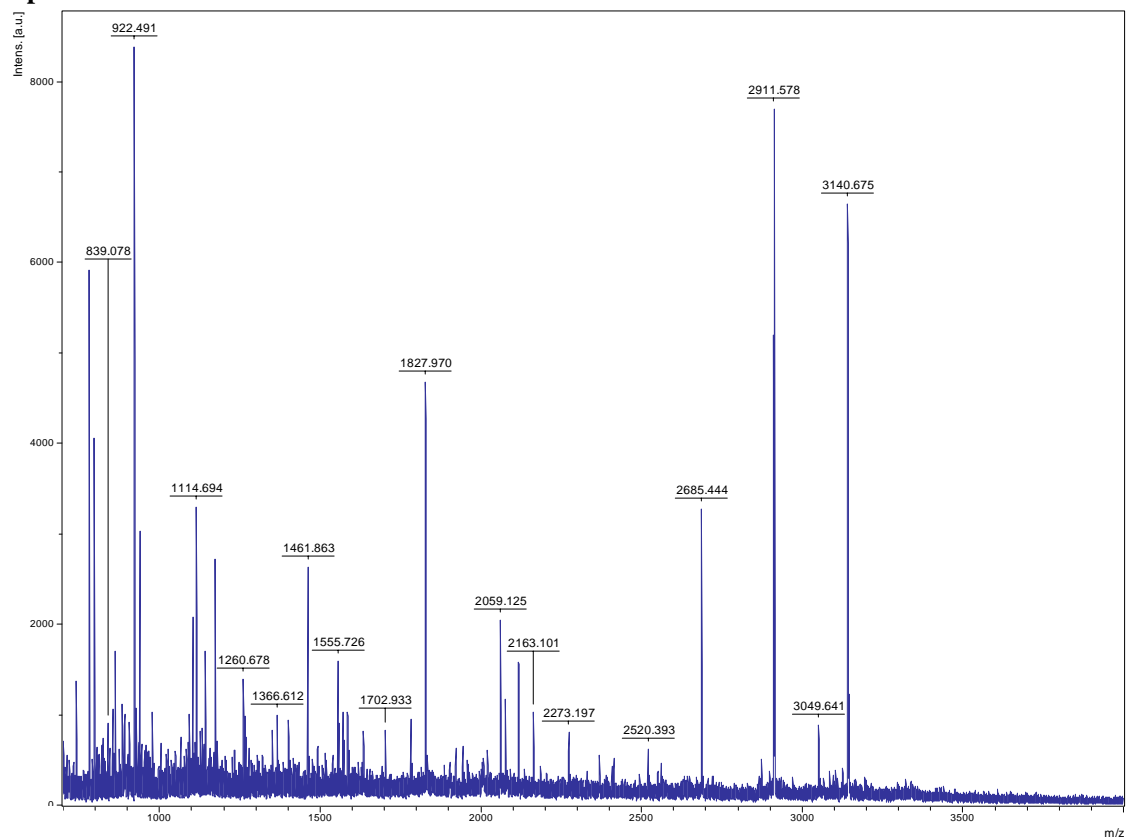

Match to: gi|50905315 Score: 146 Expect: 1.7e-10

### Matched peptides:

| Start - End | Observed  | Mr (expt) | Mr (calc) | Delta   | Miss Sequence                                             |
|-------------|-----------|-----------|-----------|---------|-----------------------------------------------------------|
| 2 - 14      | 1366.6057 | 1365.5984 | 1365.5870 | 0.0114  | 0 M.AGMAPEGSQFDAQ.H Acetyl (N-term); Oxidation (M)        |
| 55 - 70     | 1827.9457 | 1826.9384 | 1826.9315 | 0.0070  | 0 R.GIYAGFEKPSAIQQR.G                                     |
| 92 - 119    | 3140.5814 | 3139.5741 | 3139.5681 | 0.0060  | 0 K.TATFCSGILQQLDYGLVECQSLVLPAPTR.E 2 Carbamidomethyl (C) |
| 140 - 150   | 1142.5398 | 1141.5325 | 1141.5662 | -0.0337 | 0 K.VHACVGGTSVRE Carbamidomethyl (C)                      |
| 155 - 169   | 1461.8534 | 1460.8461 | 1460.8463 | -0.0001 | 0 R.ILASGVHV VVGTPGR.V                                    |
| 186 - 198   | 1555.7116 | 1554.7043 | 1554.7058 | -0.0014 | 0 K.MFVLDEADEMLSR.G                                       |
| 186 - 198   | 1571.7339 | 1570.7266 | 1570.7007 | 0.0259  | 0 K.MFVLDEADEMLSR.G Oxidation (M)                         |
| 215 - 233   | 2059.1032 | 2058.0959 | 2058.0819 | 0.0140  | 0 K.IQVGVFSATMPPEALEITR.K                                 |
| 215 - 233   | 2075.1034 | 2074.0961 | 2074.0768 | 0.0193  | 0 K.IQVGVFSATMPPEALEITR.K Oxidation (M)                   |
| 215 - 233   | 2117.0344 | 2116.0271 | 2116.0874 | -0.0602 | 0 K.IQVGVFSATMPPEALEITR.K Acetyl (N-term); Oxidation (M)  |
| 246 - 255   | 1173.6189 | 1172.6116 | 1172.6401 | -0.0284 | 1 K.RDELTLLEGIK.Q                                         |
| 256 - 267   | 1584.7721 | 1583.7648 | 1583.7619 | 0.0029  | 1 K.QFYVNVKEDWKL                                          |
| 268 - 290   | 2685.3790 | 2684.3717 | 2684.3731 | -0.0014 | 0 K.LDTLCDLYETLAIQSVIVNTR.R Carbamidomethyl (C)           |
| 333 - 342   | 1114.6513 | 1113.6440 | 1113.6757 | -0.0317 | 0 R.VLITDLLAR.G                                           |
| 343 - 367   | 2911.5238 | 2910.5165 | 2910.4875 | 0.0290  | 0 R.GIDVQQVSLVINYLPTQPENYLHRI                             |
| 377 - 386   | 1104.6075 | 1103.6002 | 1103.6451 | -0.0448 | 1 R.KGVAINFVTR.D                                          |
| 391 - 397   | 922.3966  | 921.3893  | 921.4742  | -0.0849 | 0 R.MLFDIQR.F                                             |
| 391 - 397   | 938.3986  | 937.3913  | 937.4691  | -0.0778 | 0 R.MLFDIQR.F Oxidation (M)                               |

## Spot 1724

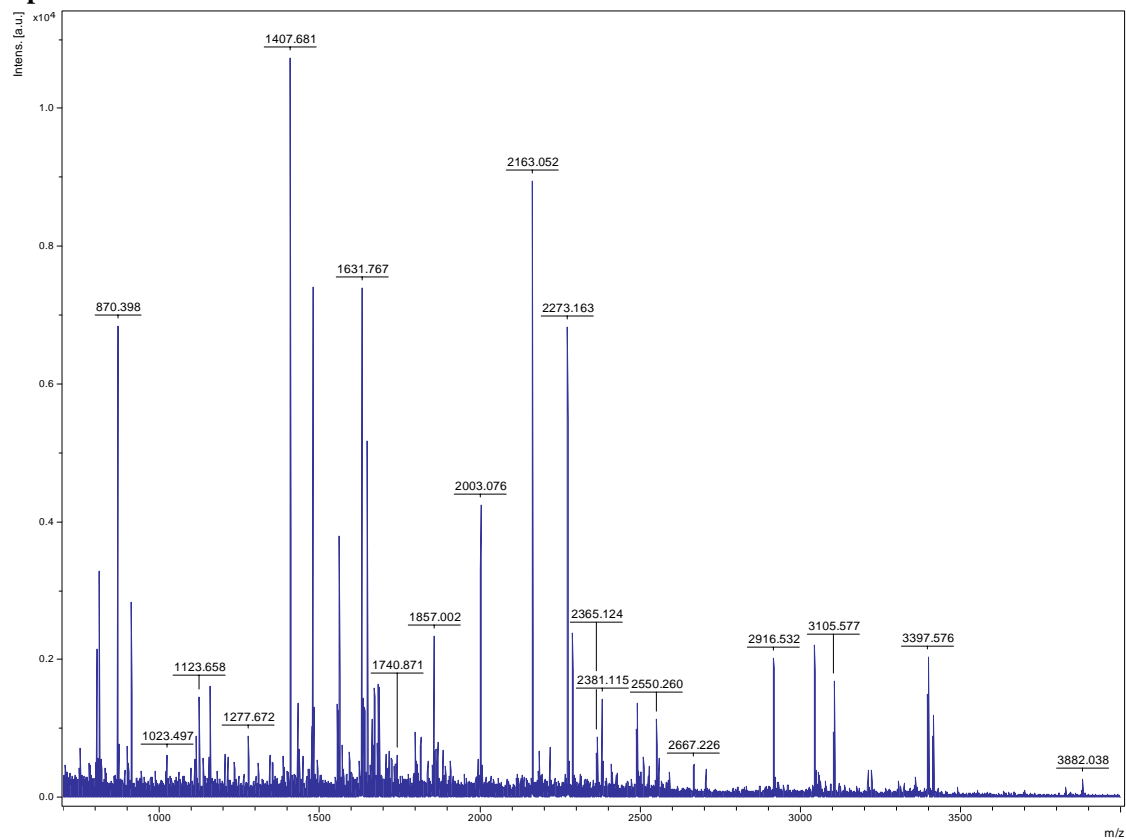

Match to: gi|50252009; Score: 171

### Matched peptides:

| Start - End | Observed | Mr (expt) | Mr (calc) | Delta | Miss Sequence                                 |
|-------------|----------|-----------|-----------|-------|-----------------------------------------------|
| 74 - 81     | 818.41   | 817.41    | 817.43    | -0.02 | 0 EISLSGGR                                    |
| 82 - 87     | 810.36   | 809.36    | 809.39    | -0.03 | 0 FQSCLR                                      |
| 146 - 161   | 1798.91  | 1797.91   | 1797.90   | 0.00  | 1 LMNVKEDHGELSSIAK                            |
| 146 - 161   | 1814.90  | 1813.90   | 1813.90   | 0.00  | 1 LMNVKEDHGELSSIAK Oxidation (M)              |
| 151 - 161   | 1213.55  | 1212.55   | 1212.57   | -0.03 | 0 EDHGELSSIAK                                 |
| 162 - 169   | 805.39   | 804.39    | 804.32    | 0.07  | 0 QGSGSACR Pyro-glu (N-term Q)                |
| 225 - 236   | 1407.68  | 1406.68   | 1406.70   | -0.03 | 0 DSVETSPLLQYK                                |
| 237 - 244   | 899.48   | 898.48    | 898.49    | -0.01 | 0 AQTVVPER                                    |
| 254 - 262   | 1113.60  | 1112.59   | 1112.54   | 0.06  | 1 SRNFESFAR                                   |
| 256 - 262   | 870.40   | 869.40    | 869.40    | -0.01 | 0 NFESFAR                                     |
| 263 - 291   | 3397.58  | 3396.57   | 3396.50   | 0.08  | 0 LTCADSNQFHAVCLDTSPPIFYMNDTSHR               |
| 263 - 291   | 3413.58  | 3412.58   | 3412.49   | 0.08  | 0 LTCADSNQFHAVCLDTSPPIFYMNDTSHR Oxidation (M) |
| 299 - 325   | 2916.53  | 2915.53   | 2915.42   | 0.11  | 0 WNQSEGTPQVAYTFDAGPNAVLIAPNR                 |
| 299 - 326   | 3044.58  | 3043.58   | 3043.52   | 0.06  | 1 WNQSEGTPQVAYTFDAGPNAVLIAPNRK                |
| 335 - 354   | 2365.12  | 2364.12   | 2364.10   | 0.02  | 0 LLYYFPPQDNDLSSYMVGDK                        |
| 335 - 354   | 2381.11  | 2380.11   | 2380.09   | 0.02  | 0 LLYYFPPQDNDLSSYMVGDK Oxidation (M)          |
| 355 - 363   | 903.49   | 902.48    | 902.51    | -0.02 | 0 SILSDAGLK                                   |
| 364 - 378   | 1569.76  | 1568.76   | 1568.79   | -0.03 | 0 SIEDVEALPAPAETK                             |
| 384 - 395   | 1478.68  | 1477.68   | 1477.70   | -0.02 | 1 FRGDVSYFICSR                                |
| 386 - 395   | 1203.51  | 1202.51   | 1202.54   | -0.03 | 0 GDVSYFICSR                                  |
| 402 - 419   | 1857.00  | 1856.00   | 1856.01   | -0.01 | 0 VVTDESALIDSVTGLPK                           |

## Spot 1727

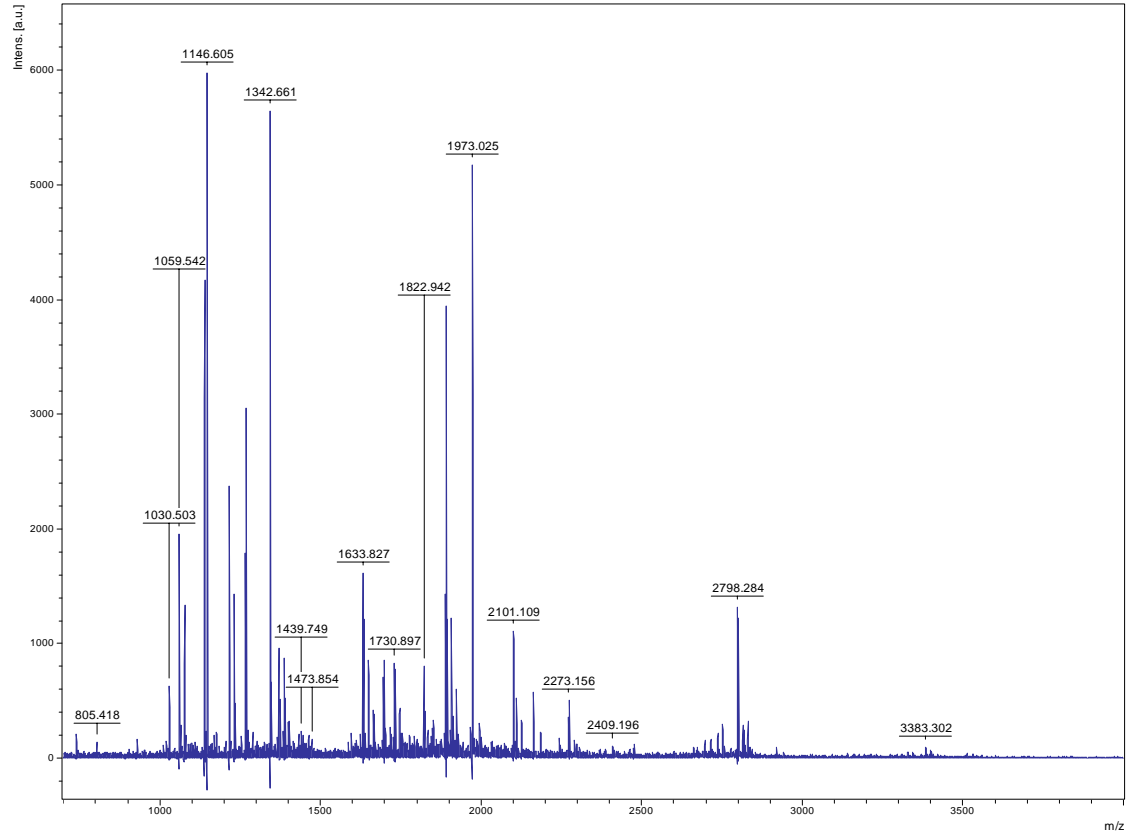

Match to: gi|34897076 Score: 137 Expect: 1.3e-09

### Matched peptides:

| Start - End | Observed  | Mr (expt) | Mr (calc) | Delta   | Miss Sequence                   |
|-------------|-----------|-----------|-----------|---------|---------------------------------|
| 20 - 35     | 1833.8619 | 1832.8546 | 1832.8151 | 0.0395  | 0 K.FWEVICDEHGVDATGR.Y          |
| 47 - 58     | 1342.6762 | 1341.6689 | 1341.6313 | 0.0377  | 0 R.INVYYNEASGGR.Y              |
| 63 - 77     | 1633.8539 | 1632.8466 | 1632.7851 | 0.0615  | 0 R.AVLMDLEPGTMDSVR.S           |
| 78 - 103    | 2798.3373 | 2797.3300 | 2797.3360 | -0.0059 | 0 R.SGPFQIFRPDNFVFGQSGAGNNWAK.G |
| 104 - 121   | 1973.0257 | 1972.0184 | 1971.9901 | 0.0283  | 0 K.GHYTEGAELIDSVLDVVR.K        |
| 104 - 122   | 2101.1222 | 2100.1149 | 2100.0851 | 0.0299  | 1 K.GHYTEGAELIDSVLDVVRK.E       |
| 155 - 162   | 1077.5431 | 1076.5358 | 1076.5250 | 0.0108  | 1 K.IREEYPDR.M                  |
| 242 - 251   | 1146.6067 | 1145.5994 | 1145.5829 | 0.0165  | 0 R.FPGQLNSDLR.K                |
| 242 - 252   | 1274.6900 | 1273.6827 | 1273.6778 | 0.0049  | 1 R.FPGQLNSDLR.L                |
| 252 - 262   | 1267.8170 | 1266.8097 | 1266.7812 | 0.0285  | 1 R.KLAVNLIPFPR.L               |
| 253 - 262   | 1139.7131 | 1138.7058 | 1138.6862 | 0.0196  | 0 K.LAVNLIPFPR.L                |
| 263 - 276   | 1622.8772 | 1621.8699 | 1621.8438 | 0.0261  | 0 R.LHFFMVGFAPLTSR.G            |
| 277 - 282   | 738.2532  | 737.2459  | 737.3456  | -0.0997 | 0 R.GSQYR.A                     |
| 283 - 297   | 1730.9124 | 1729.9051 | 1729.8709 | 0.0342  | 0 R.ALTVPELTQQMWDAK.N           |
| 310 - 318   | 1059.5329 | 1058.5256 | 1058.5219 | 0.0038  | 0 R.YLTASAMFR.G                 |
| 325 - 336   | 1446.7001 | 1445.6928 | 1445.6820 | 0.0108  | 0 K.EVDQMLNVQNK.N               |
| 337 - 350   | 1696.8599 | 1695.8526 | 1695.8256 | 0.0270  | 0 K.NSSYFVEVIPNNVK.S            |
| 363 - 379   | 1889.9244 | 1888.9171 | 1888.8811 | 0.0360  | 0 K.MAATFVGNSTSIQEMFR.R         |
| 381 - 390   | 1215.6110 | 1214.6037 | 1214.5753 | 0.0284  | 0 R.VSEQFTAMFR.R                |

### Spot 1730

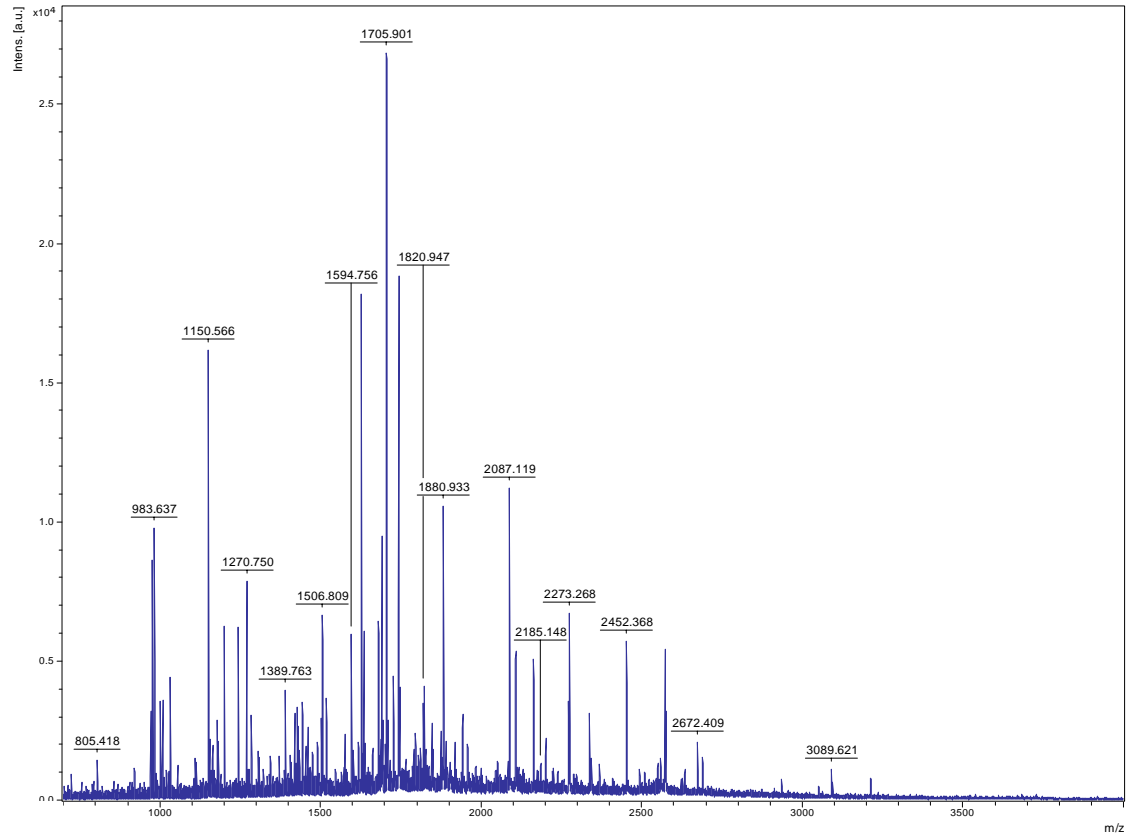

Match to: gi|50582723 Score: 192 Expect: 1.7e-14

#### Matched peptides:

| Start - End | Observed  | Mr (expt) | Mr (calc) | Delta   | Miss Sequence                                            |
|-------------|-----------|-----------|-----------|---------|----------------------------------------------------------|
| 1 - 19      | 1874.9437 | 1873.9364 | 1873.9502 | -0.0137 | 1 -MAAMDLRVAAPASVAAAAR.C 2 Oxidation (M)                 |
| 46 - 73     | 2688.3911 | 2687.3838 | 2687.3725 | 0.0113  | 1 R.LSVRTSVATTEAAAAAVGASEDAALEAR.D                       |
| 77 - 90     | 1270.7504 | 1269.7431 | 1269.7404 | 0.0027  | 0 K.TVVAVILGGGAGTR.L                                     |
| 99 - 110    | 1199.6957 | 1198.6884 | 1198.6822 | 0.0062  | 0 R.AKPAVPIGGAYR.L                                       |
| 111 - 126   | 1790.9194 | 1789.9122 | 1789.8702 | 0.0419  | 0 R.LIDVPMSCINSGINK.V Carbamidomethyl (C); Oxidation (M) |
| 127 - 140   | 1625.8896 | 1624.8824 | 1624.8573 | 0.0251  | 0 K.VYILTQFNASLNR.H                                      |
| 175 - 184   | 1150.5665 | 1149.5593 | 1149.5567 | 0.0026  | 0 R.WFQGTADAVR.Q                                         |
| 185 - 194   | 1284.5967 | 1283.5894 | 1283.5822 | 0.0072  | 0 R.QFDWLFDDAK.A                                         |
| 195 - 211   | 1943.0857 | 1942.0784 | 1942.0159 | 0.0625  | 1 K.AKDIDDLVILSGDHLRY.M                                  |
| 197 - 211   | 1743.9406 | 1742.9333 | 1742.8839 | 0.0494  | 0 K.DIDDLVILSGDHLRY.M                                    |
| 212 - 222   | 1428.6112 | 1427.6039 | 1427.5962 | 0.0078  | 0 R.MDYMDFVQSHR.Q                                        |
| 212 - 222   | 1444.6128 | 1443.6055 | 1443.5911 | 0.0144  | 0 R.MDYMDFVQSHR.Q Oxidation (M)                          |
| 212 - 222   | 1460.6019 | 1459.5947 | 1459.5860 | 0.0086  | 0 R.MDYMDFVQSHR.Q 2 Oxidation (M)                        |
| 223 - 239   | 1919.0067 | 1917.9994 | 1917.9037 | 0.0958  | 1 R.QRGADISICLPIDDSR.A Carbamidomethyl (C)               |
| 225 - 239   | 1691.8157 | 1690.8084 | 1690.7654 | 0.0430  | 0 R.GADISICLPIDDSR.A 2 Carbamidomethyl (C)               |
| 300 - 307   | 983.6373  | 982.6301  | 982.6175  | 0.0126  | 0 K.EILLNLLR.W                                           |
| 308 - 326   | 2107.1604 | 2106.1531 | 2106.0534 | 0.0997  | 1 R.WRFPPTANDFGSEIIPASAKE                                |
| 332 - 346   | 1847.9493 | 1846.9421 | 1846.8777 | 0.0643  | 0 K.AYLFNDYWEDIGTIK.S                                    |
| 347 - 361   | 1705.9009 | 1704.8936 | 1704.8471 | 0.0465  | 0 K.SFTEANLSLAEQPPR.F                                    |
| 362 - 375   | 1726.8424 | 1725.8351 | 1725.7820 | 0.0531  | 0 R.FSFYDANKPMYTSR.R                                     |
| 362 - 375   | 1742.8411 | 1741.8338 | 1741.7770 | 0.0568  | 0 R.FSFYDANKPMYTSR.R Oxidation (M)                       |
| 376 - 387   | 1370.7021 | 1369.6949 | 1369.7136 | -0.0187 | 1 R.RNLPSPMINNSK.I                                       |
| 388 - 403   | 1880.9330 | 1879.9257 | 1879.8557 | 0.0701  | 0 K.ITDSIISHGCFLDSCR.I 2 Carbamidomethyl (C)             |
| 404 - 412   | 1009.5890 | 1008.5817 | 1008.5716 | 0.0101  | 0 R.IEHSVVGIR.S                                          |
| 447 - 456   | 1027.5999 | 1026.5926 | 1026.5709 | 0.0217  | 0 K.VPIGIGENTK.I                                         |
| 457 - 467   | 1344.7148 | 1343.7076 | 1343.6979 | 0.0096  | 1 K.IQNCIIDKNAR.I Carbamidomethyl (C)                    |
| 471 - 485   | 1618.7993 | 1617.7920 | 1617.7594 | 0.0327  | 0 K.NVTISNSEGVQEADR.T                                    |
| 486 - 493   | 972.4952  | 971.4879  | 971.4712  | 0.0167  | 0 R.TSEGFIYR.S                                           |



### Spot 1732

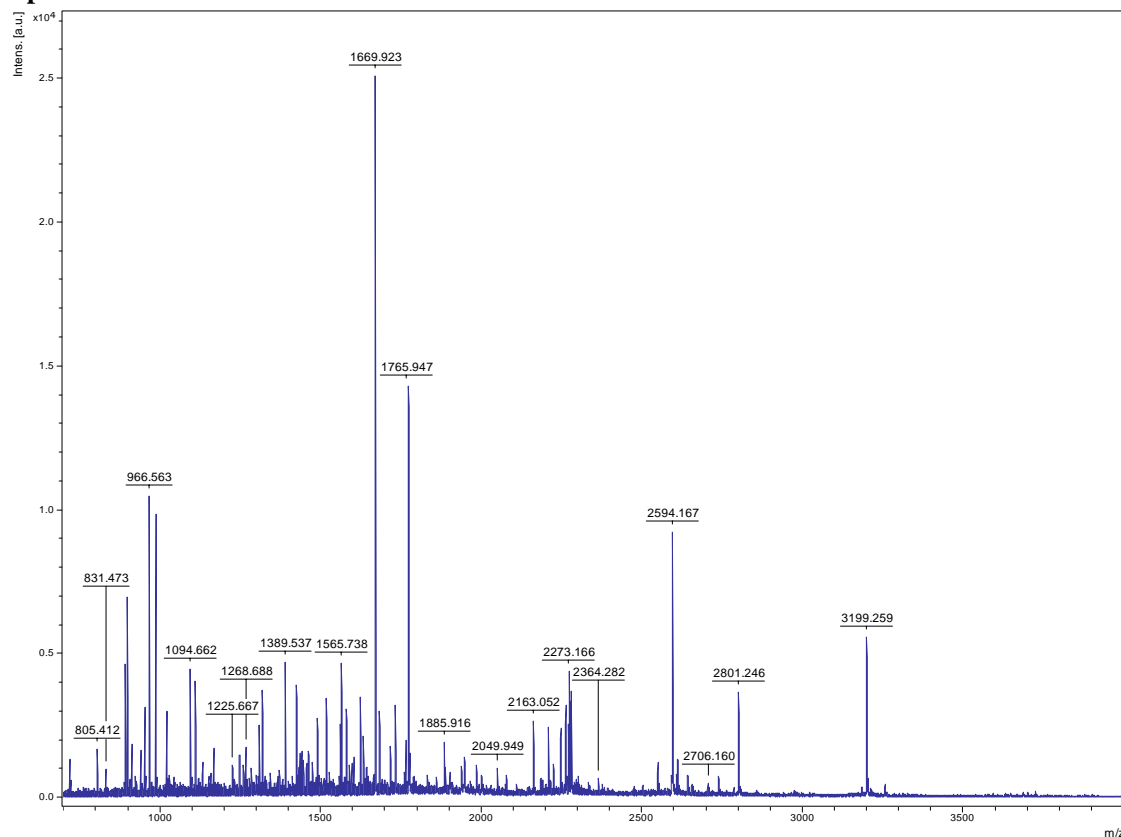

Match to: gi|50919439 Score: 134 Expect: 2.7e-09

#### Matched peptides:

| Start - End | Observed  | Mr (expt) | Mr (calc) | Delta   | Miss Sequence                              |
|-------------|-----------|-----------|-----------|---------|--------------------------------------------|
| 31 - 48     | 1938.8925 | 1937.8852 | 1938.0322 | -0.1470 | 1 R.LLARGYSVHAAVLNPDDK.A                   |
| 35 - 48     | 1485.7642 | 1484.7569 | 1484.7259 | 0.0310  | 0 R.GYSVHAAVLNPDDK.A                       |
| 35 - 66     | 3199.4639 | 3198.4566 | 3198.5441 | -0.0875 | 1 R.GYSVHAAVLNPDDK.AETDHLHALAAAGGGEGE.R    |
| 49 - 66     | 1732.8683 | 1731.8610 | 1731.8288 | 0.0322  | 0 K.AETDHLHALAAAGGGEGE.R                   |
| 70 - 86     | 1669.9496 | 1668.9423 | 1668.9198 | 0.0225  | 0 R.VFPGDLLDGAALLAAAR.G                    |
| 87 - 102    | 1717.8443 | 1716.8370 | 1716.8075 | 0.0295  | 0 R.GCSGVFHLASPCIVDR.V Carbamidomethyl (C) |
| 103 - 123   | 2263.2899 | 2262.2826 | 2262.2405 | 0.0421  | 0 R.VLDPQAQLMVAVEGTLLNVL.R.A               |
| 103 - 123   | 2279.2752 | 2278.2679 | 2278.2354 | 0.0325  | 0 R.VLDPQAQLMVAVEGTLLNVL.R.A Oxidation (M) |
| 133 - 155   | 2364.3209 | 2363.3136 | 2363.2960 | 0.0176  | 1 R.RVVVTSSISAIVPSGWPAGEVR.D               |
| 134 - 155   | 2208.2162 | 2207.2089 | 2207.1949 | 0.0140  | 0 R.VVVVTSSISAIVPSGWPAGEVR.D               |
| 156 - 168   | 1789.8850 | 1788.8777 | 1788.7083 | 0.1694  | 1 R.DERCWTDLDYCEK.N 2 Carbamidomethyl (C)  |
| 159 - 168   | 1389.5613 | 1388.5540 | 1388.5377 | 0.0163  | 0 R.CWTDLDYCEK.N 2 Carbamidomethyl (C)     |
| 260 - 275   | 1885.9328 | 1884.9255 | 1884.8941 | 0.0315  | 0 R.HLCVQSIHWSDFASK.V Carbamidomethyl (C)  |
| 276 - 284   | 1111.5741 | 1110.5668 | 1110.5597 | 0.0071  | 0 K.VAELYPEYK.V                            |
| 276 - 287   | 1435.7960 | 1434.7887 | 1434.7758 | 0.0129  | 1 K.VAELYPEYKVPK.L                         |
| 291 - 298   | 899.4783  | 898.4710  | 898.4872  | -0.0162 | 0 K.ETQPGLVR.A                             |
| 291 - 304   | 1456.7274 | 1455.7201 | 1455.7681 | -0.0480 | 1 K.ETQPGLVRAEAASK.K                       |
| 305 - 318   | 1574.8867 | 1573.8794 | 1573.8901 | -0.0107 | 1 K.KLIALGLQFSPMEK.I                       |
| 305 - 318   | 1590.9039 | 1589.8966 | 1589.8850 | 0.0116  | 1 K.KLIALGLQFSPMEK.I Oxidation (M)         |
| 306 - 318   | 1446.8214 | 1445.8141 | 1445.7952 | 0.0190  | 0 K.LIALGLQFSPMEK.I                        |
| 306 - 318   | 1462.8064 | 1461.7991 | 1461.7901 | 0.0090  | 0 K.LIALGLQFSPMEK.I Oxidation (M)          |

Match to: gi|77556476 Score: 77 Expect: 0.0015

#### Matched peptides:

| Start - End | Observed  | Mr (expt) | Mr (calc) | Delta   | Miss Sequence                      |
|-------------|-----------|-----------|-----------|---------|------------------------------------|
| 7 - 31      | 2801.3383 | 2800.3310 | 2800.3820 | -0.0509 | 0 R.NPLQEYQVAHIPGALFFVDGSDR.T      |
| 32 - 43     | 1326.6945 | 1325.6872 | 1325.6649 | 0.0223  | 0 R.TSSLPHMLPSEK.A                 |
| 67 - 79     | 1642.7913 | 1641.7840 | 1641.8238 | -0.0398 | 1 K.GLFSAAARVWWMFR.V Oxidation (M) |
| 74 - 79     | 940.4370  | 939.4297  | 939.4425  | -0.0128 | 0 R.VWWMFR.V Oxidation (M)         |
| 86 - 97     | 1425.7835 | 1424.7762 | 1424.7564 | 0.0198  | 0 K.VWVLDGGLPQWR.A                 |
| 98 - 114    | 1699.8109 | 1698.8036 | 1698.7948 | 0.0089  | 0 R.ASGYDVESSASSDAILK.A            |
| 140 - 152   | 1603.9103 | 1602.9030 | 1602.8882 | 0.0148  | 0 K.LQPHLIWNLDQVK.E                |
| 159 - 166   | 953.5096  | 952.5023  | 952.5090  | -0.0067 | 0 K.THQLIDAR.G                     |
| 171 - 179   | 987.4836  | 986.4763  | 986.4821  | -0.0058 | 0 R.FDGAVPEPR.K                    |
| 205 - 212   | 966.5513  | 965.5440  | 965.5545  | -0.0105 | 0 K.LLPPPELR.K                     |
| 205 - 213   | 1094.6569 | 1093.6496 | 1093.6495 | 0.0001  | 1 K.LLPPPELRK.R                    |
| 249 - 273   | 2643.2141 | 2642.2068 | 2642.1925 | 0.0143  | 0 K.TDVPVYDGSVTEWGAHPDTPVATAA.-    |

### Spot 1736

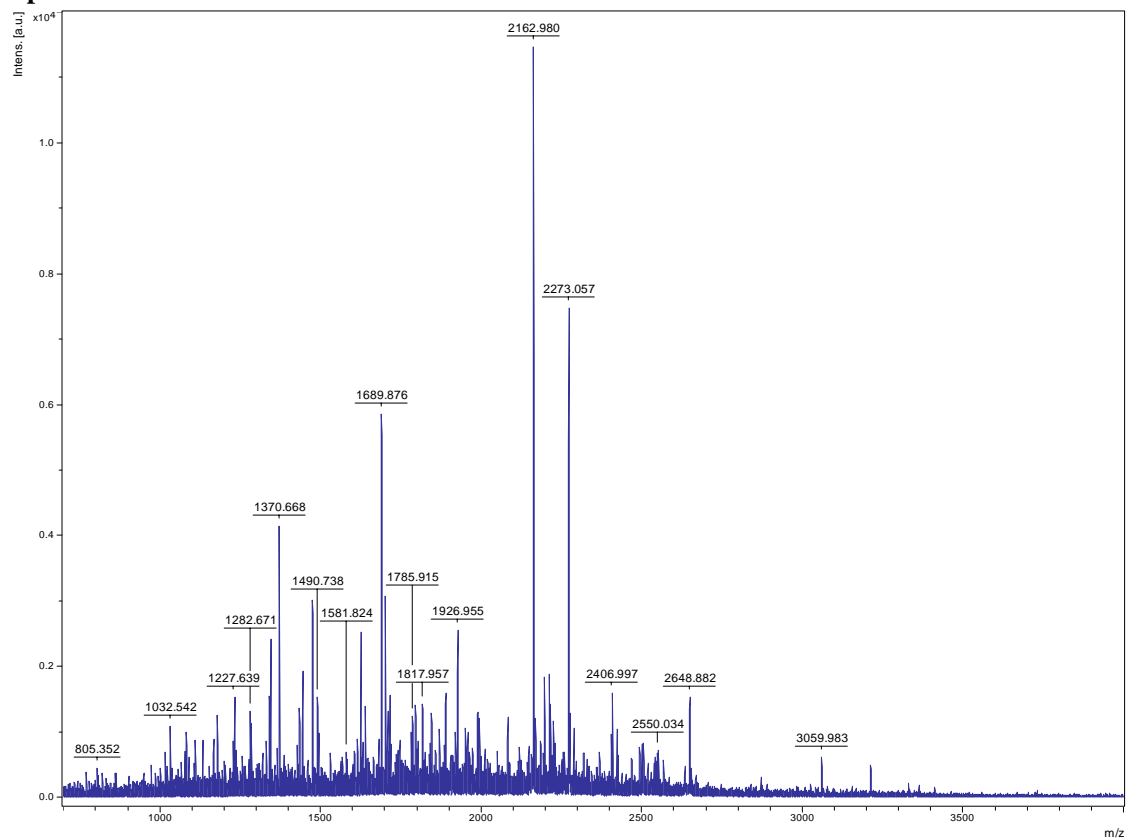

Match to: gi|51978958 Score: 76 Expect: 0.0018

#### Matched peptides:

| Start - End | Observed  | Mr (expt) | Mr (calc) | Delta   | Miss Sequence                             |
|-------------|-----------|-----------|-----------|---------|-------------------------------------------|
| 13 - 33     | 2196.9697 | 2195.9625 | 2196.0368 | -0.0743 | 0 K.ALEGDMATDNSSSLALAEVFR.A               |
| 13 - 33     | 2212.9758 | 2211.9686 | 2212.0317 | -0.0632 | 0 K.ALEGDMATDNSSSLALAEVFR.A Oxidation (M) |
| 34 - 42     | 1022.5729 | 1021.5657 | 1021.6032 | -0.0376 | 0 R.APLRPDVVR.F                           |
| 62 - 75     | 1444.6365 | 1443.6292 | 1443.6491 | -0.0199 | 0 R.AGHQTSAESWGTGR.A                      |
| 91 - 101    | 1111.5464 | 1110.5391 | 1110.4698 | 0.0693  | 0 R.AGQGFAGNMCR.G                         |
| 91 - 101    | 1168.5619 | 1167.5546 | 1167.4913 | 0.0633  | 0 R.AGQGFAGNMCR.G Carbamidomethyl (C)     |
| 126 - 144   | 1796.0535 | 1795.0462 | 1795.0567 | -0.0105 | 0 R.VAVASALAATSVPSLVLAR.G                 |
| 148 - 167   | 2169.0737 | 2168.0665 | 2168.1463 | -0.0799 | 0 R.IETVPELPLVISDSAESIEK.T                |
| 228 - 239   | 1282.6714 | 1281.6641 | 1281.6676 | -0.0035 | 0 R.NLPGVADVAVVER.L                       |
| 240 - 253   | 1445.8086 | 1444.8013 | 1444.8150 | -0.0137 | 0 R.LNLLDLAPGGHLGR.F                      |
| 254 - 263   | 1227.6394 | 1226.6321 | 1226.6335 | -0.0014 | 0 R.FVIWTESAFK.K                          |
| 265 - 279   | 1710.8865 | 1709.8792 | 1709.8875 | -0.0083 | 1 K.LEEVYGTFEAPSLKK.K                     |
| 297 - 312   | 1782.9641 | 1781.9568 | 1781.9886 | -0.0318 | 0 R.IINSDEVQSVVPLNK.E                     |
| 342 - 351   | 1077.5846 | 1076.5773 | 1076.5648 | 0.0125  | 1 R.KMATLAEAAAR.I Oxidation (M)           |

## Spot 1742

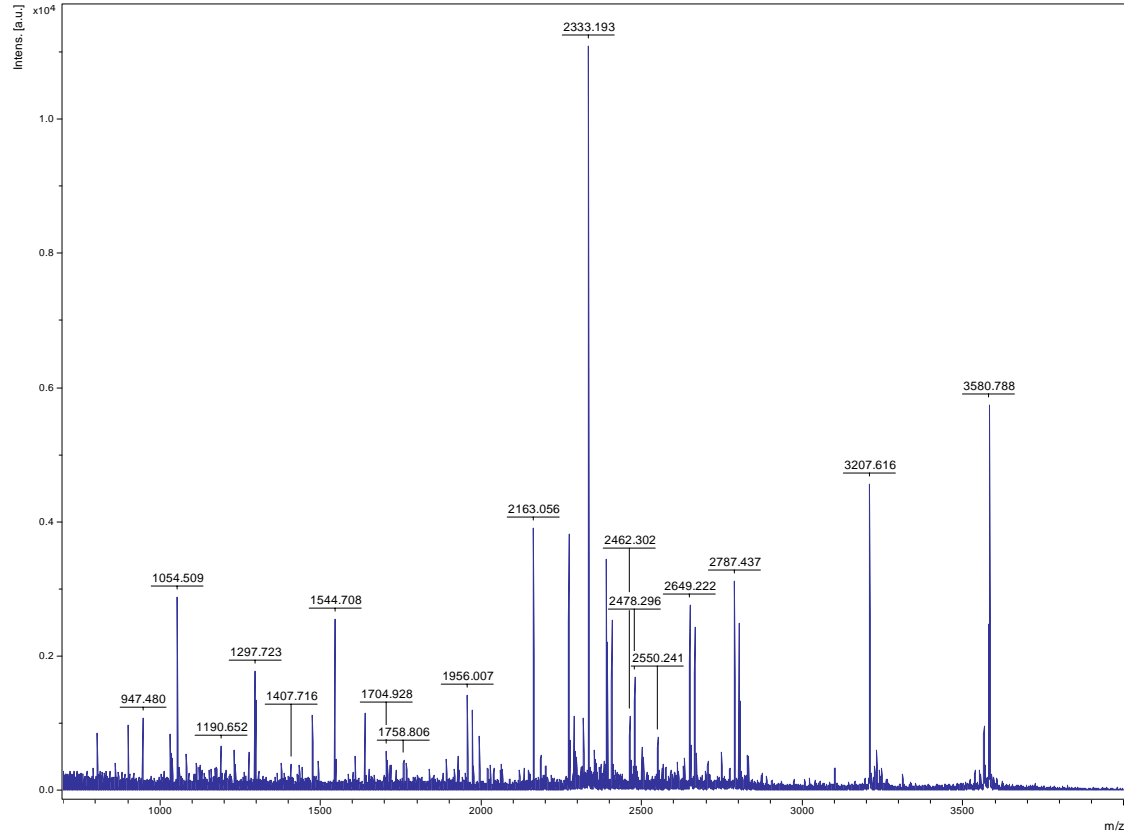

Match to: gi|51090745; Score: 141

### Matched peptides:

| Start - End | Observed | Mr (expt) | Mr (calc) | Delta | Miss Sequence                                             |
|-------------|----------|-----------|-----------|-------|-----------------------------------------------------------|
| 53 - 74     | 2390.18  | 2389.18   | 2389.16   | 0.01  | 0 VVITGMGLVSVFGNDVDAYYDR                                  |
| 53 - 74     | 2406.17  | 2405.17   | 2405.16   | 0.01  | 0 VVITGMGLVSVFGNDVDAYYDR Oxidation (M)                    |
| 75 - 87     | 1297.72  | 1296.72   | 1296.70   | 0.02  | 0 LLAGESGIGPIDR                                           |
| 75 - 96     | 2333.19  | 2332.19   | 2332.18   | 0.01  | 1 LLAGESGIGPIDRFDASNFPTK                                  |
| 88 - 96     | 1054.51  | 1053.51   | 1053.49   | 0.02  | 0 FDASNFPTK                                               |
| 103 - 116   | 1544.71  | 1543.71   | 1543.69   | 0.02  | 1 GFSSEGYIDGKNDK                                          |
| 117 - 123   | 947.48   | 946.48    | 946.47    | 0.01  | 1 RLDDCLR                                                 |
| 153 - 177   | 2462.30  | 2461.30   | 2461.29   | 0.01  | 0 AGVLVGTGMGGLTVFSDGVQNLIEK                               |
| 153 - 177   | 2478.30  | 2477.29   | 2477.28   | 0.01  | 0 AGVLVGTGMGGLTVFSDGVQNLIEK Oxidation (M)                 |
| 232 - 259   | 2787.44  | 2786.44   | 2786.42   | 0.01  | 1 RGEADVMIAGGTEAIIPIGVGGFVACR                             |
| 232 - 259   | 2803.43  | 2802.43   | 2802.42   | 0.01  | 1 RGEADVMIAGGTEAIIPIGVGGFVACR Oxidation (M)               |
| 270 - 279   | 1231.58  | 1230.58   | 1230.57   | 0.01  | 0 TASRPWDQDR                                              |
| 303 - 326   | 2649.22  | 2648.22   | 2648.20   | 0.02  | 0 DAPIIAEYLGGAVNCDAHYHMTDPR                               |
| 303 - 326   | 2665.22  | 2664.21   | 2664.19   | 0.02  | 0 DAPIIAEYLGGAVNCDAHYHMTDPR Oxidation (M)                 |
| 338 - 372   | 3563.74  | 3562.74   | 3562.75   | -0.02 | 0 QSLADAGVAPEEVNYINAHATSTLAGDLAEVNAIR Pyro-glu (N-term Q) |
| 338 - 372   | 3580.79  | 3579.79   | 3579.78   | 0.01  | 0 QSLADAGVAPEEVNYINAHATSTLAGDLAEVNAIR                     |
| 373 - 382   | 1190.65  | 1189.65   | 1189.63   | 0.02  | 1 QVFKDPSEIK                                              |
| 388 - 407   | 1956.01  | 1955.01   | 1955.00   | 0.01  | 0 SMIGHCLGAAGGLEAIATVK                                    |
| 388 - 407   | 1972.00  | 1971.00   | 1970.99   | 0.01  | 0 SMIGHCLGAAGGLEAIATVK Oxidation (M)                      |
| 408 - 436   | 3207.62  | 3206.61   | 3206.60   | 0.01  | 0 AITGWVHPSINQFNPEPAVEFDTPVNVK                            |

## Spot 1744

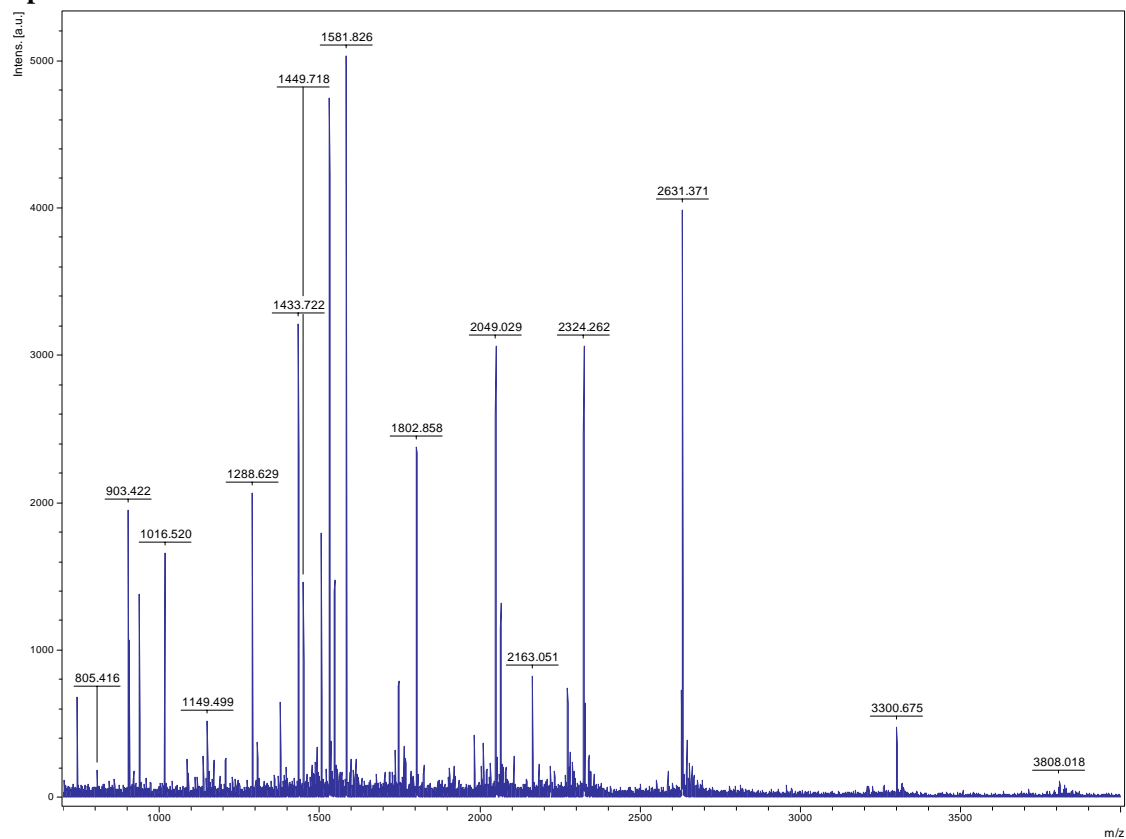

Match to: gj|115479945 Score: 247 Expect: 2.7e-20

### Matched peptides:

| Start - End | Observed  | Mr (expt) | Mr (calc) | ppm | Miss Sequence                            |
|-------------|-----------|-----------|-----------|-----|------------------------------------------|
| 47 - 53     | 937.4870  | 936.4797  | 936.4930  | -14 | 0 R.FDLLHHR.G                            |
| 47 - 61     | 1734.9627 | 1733.9555 | 1733.8346 | 70  | 1 R.FDLLHHRGSSHGSR.T                     |
| 65 - 77     | 1530.7347 | 1529.7274 | 1529.7449 | -11 | 0 R.ATYPQAHYPPMVR.L                      |
| 65 - 77     | 1546.7208 | 1545.7135 | 1545.7398 | -17 | 0 R.ATYPQAHYPPMVR.L Oxidation (M)        |
| 82 - 88     | 903.4223  | 902.4150  | 902.4246  | -11 | 0 R.LWDDAQR.D                            |
| 94 - 106    | 1433.7216 | 1432.7143 | 1432.7497 | -25 | 0 R.VLTPPHLDMGPR.A                       |
| 94 - 106    | 1449.7175 | 1448.7103 | 1448.7446 | -24 | 0 R.VLTPPHLDMGPR.A Oxidation (M)         |
| 139 - 155   | 1746.8540 | 1745.8467 | 1745.8658 | -11 | 0 R.LPEGWTAATSEIGGVMK.A                  |
| 139 - 155   | 1762.8412 | 1761.8340 | 1761.8607 | -15 | 0 R.LPEGWTAATSEIGGVMK.A Oxidation (M)    |
| 159 - 169   | 1136.5684 | 1135.5612 | 1135.6059 | -39 | 0 K.AVAMFQSLAAK.N                        |
| 176 - 185   | 1087.5784 | 1086.5711 | 1086.6033 | -30 | 1 R.DRTEVVGIAK.Q                         |
| 195 - 205   | 1149.4990 | 1148.4917 | 1148.5098 | -16 | 0 K.TSSGEEFHGAK.C                        |
| 206 - 216   | 1205.5913 | 1204.5840 | 1204.6274 | -36 | 0 K.CHTVGAWASK.L                         |
| 220 - 239   | 2324.2618 | 2323.2546 | 2323.2147 | 17  | 0 R.SVAGVDLPVQPLHTLICVWR.A               |
| 245 - 278   | 3808.0182 | 3807.0109 | 3806.7702 | 63  | 0 R.EHELTPESGFPTFASYGDPYIYSTPSMEFFPLIK.V |
| 279 - 292   | 1504.6830 | 1503.6757 | 1503.7001 | -16 | 1 K.VAAHGGPPCDPDRR.D                     |
| 293 - 308   | 1581.8259 | 1580.8186 | 1580.8311 | -8  | 0 R.DWLAGAGAGLVEPVAR.W                   |
| 309 - 327   | 2049.0291 | 2048.0218 | 2048.0150 | 3   | 0 R.WIDEVMPGHVDTAGGPVIR.Q                |
| 309 - 327   | 2065.0159 | 2064.0086 | 2064.0099 | -1  | 0 R.WIDEVMPGHVDTAGGPVIR.Q Oxidation (M)  |
| 352 - 365   | 1376.6564 | 1375.6491 | 1375.6885 | -29 | 0 K.DVVVGAGFSGHGFK.M                     |
| 373 - 384   | 1288.6286 | 1287.6213 | 1287.6492 | -22 | 0 R.ILAEMALDGEAR.T                       |
| 373 - 384   | 1304.6058 | 1303.5985 | 1303.6442 | -35 | 0 R.ILAEMALDGEAR.T Oxidation (M)         |
| 385 - 394   | 1016.5205 | 1015.5132 | 1015.5298 | -16 | 0 R.TAAEAGVELR.H                         |
| 398 - 413   | 1802.8580 | 1801.8507 | 1801.8595 | -5  | 1 R.IGRFEDNPEGNLAENK.V                   |

# Spot 1749

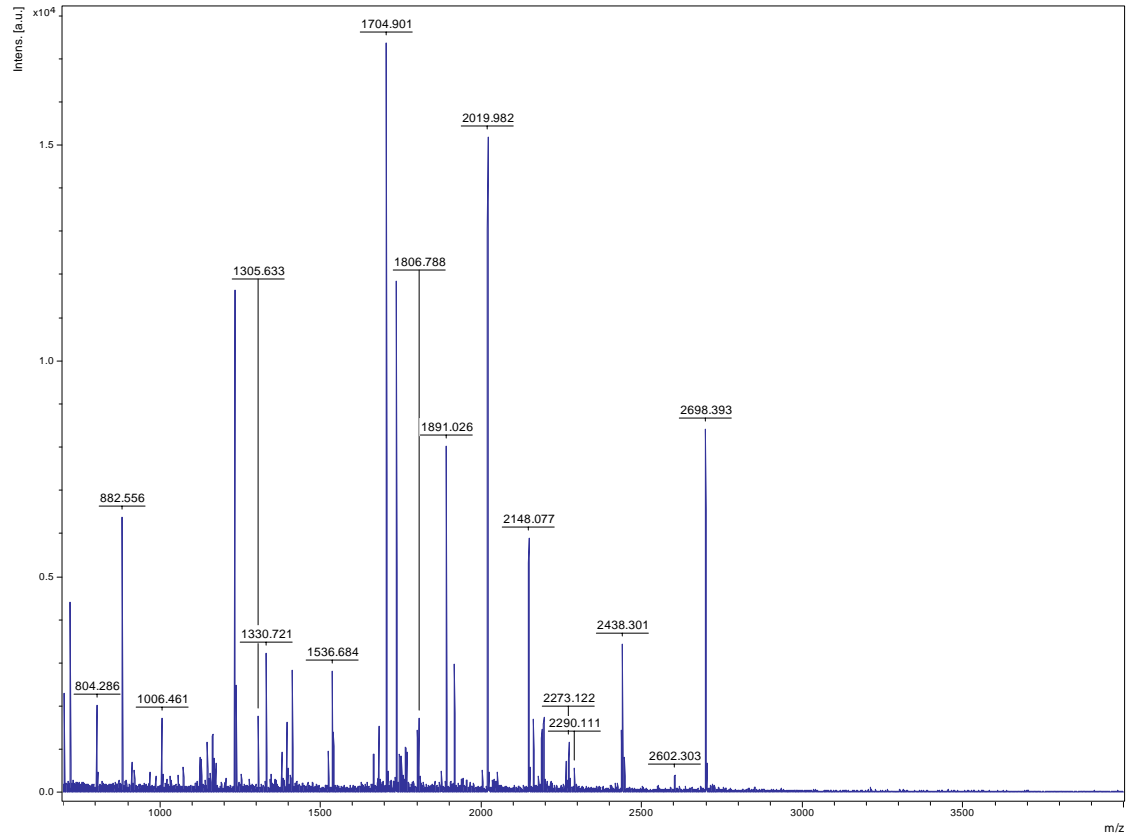

Match to: gj115451055 Score: 228 Expect: 1.2e-18

## Matched peptides:

| Start - End | Observed  | Mr (expt) | Mr (calc) | Delta   | Miss Sequence                               |
|-------------|-----------|-----------|-----------|---------|---------------------------------------------|
| 2 - 21      | 1735.9221 | 1734.9148 | 1734.9012 | 0.0136  | 0 M.SLSTVNHAAAAAAAAAGPGK.S                  |
| 60 - 79     | 2004.0212 | 2003.0139 | 2002.9959 | 0.0180  | 0 R.VSALSQVSGVLGSQWGDEGK.G                  |
| 60 - 81     | 2189.1303 | 2188.1230 | 2188.1123 | 0.0107  | 1 R.VSALSQVSGVLGSQWGDEGKGL                  |
| 82 - 89     | 882.4573  | 881.4500  | 881.5334  | -0.0834 | 0 K.LVDVLAPR.F                              |
| 96 - 112    | 1763.8210 | 1762.8137 | 1762.7692 | 0.0445  | 0 R.CQGGANAGHTTYNSEGK.K Carbamidomethyl (C) |
| 167 - 181   | 1704.9756 | 1703.9683 | 1703.9107 | 0.0576  | 0 R.AHLLFDLHQAVDGLR.E                       |
| 167 - 181   | 1746.8045 | 1745.7972 | 1745.9212 | -0.1240 | 0 R.AHLLFDLHQAVDGLR.E Acetyl (N-term)       |
| 182 - 194   | 1380.7347 | 1379.7274 | 1379.6932 | 0.0342  | 0 R.EAELANSFIGTTR.R                         |
| 182 - 195   | 1536.7610 | 1535.7537 | 1535.7943 | -0.0406 | 1 R.EAELANSFIGTTR.R                         |
| 195 - 204   | 1124.5610 | 1123.5537 | 1123.5444 | 0.0093  | 1 K.RGIGPCYSSK.V Carbamidomethyl (C)        |
| 217 - 230   | 1681.8618 | 1680.8545 | 1680.8181 | 0.0364  | 1 R.HMDTFGDKLDVLFK.D Oxidation (M)          |
| 236 - 243   | 1006.4167 | 1005.4094 | 1005.4443 | -0.0349 | 0 R.FEGFEYSK.S                              |
| 244 - 252   | 1148.5750 | 1147.5677 | 1147.5655 | 0.0022  | 1 K.SMLREEVER.Y                             |
| 244 - 252   | 1164.5766 | 1163.5693 | 1163.5604 | 0.0089  | 1 K.SMLREEVER.Y Oxidation (M)               |
| 256 - 278   | 2698.3672 | 2697.3599 | 2697.4125 | -0.0526 | 1 R.FAERLEPFIADTVHLLNESIQQK.K               |
| 260 - 278   | 2195.1901 | 2194.1828 | 2194.1633 | 0.0195  | 0 R.LEPFIADTVHLLNESIQQK.K                   |
| 321 - 330   | 1073.5842 | 1072.5769 | 1072.5950 | -0.0181 | 0 R.CIGDLIGVVK.A Carbamidomethyl (C)        |
| 321 - 335   | 1665.8727 | 1664.8654 | 1664.8919 | -0.0265 | 1 R.CIGDLIGVVKAYTTR.V Carbamidomethyl (C)   |
| 336 - 354   | 2020.0408 | 2019.0335 | 2018.9948 | 0.0387  | 0 R.VGSGPFPTELFGEEDLLR.K                    |
| 336 - 355   | 2148.1161 | 2147.1088 | 2147.0898 | 0.0190  | 1 R.VGSGPFPTELFGEEDLLR.K.S                  |
| 355 - 368   | 1524.8111 | 1523.8038 | 1523.7514 | 0.0524  | 1 R.KSGMEFGTTTGRPR.R                        |
| 355 - 368   | 1540.8053 | 1539.7980 | 1539.7463 | 0.0517  | 1 R.KSGMEFGTTTGRPR.R Oxidation (M)          |
| 356 - 368   | 1396.7182 | 1395.7109 | 1395.6564 | 0.0545  | 0 K.SGMEFGTTTGRPR.R                         |
| 356 - 368   | 1412.7050 | 1411.6977 | 1411.6514 | 0.0464  | 0 K.SGMEFGTTTGRPR.R Oxidation (M)           |
| 369 - 379   | 1330.7673 | 1329.7600 | 1329.7227 | 0.0373  | 1 R.RCGWLDIVALK.Y Carbamidomethyl (C)       |
| 370 - 379   | 1174.6391 | 1173.6318 | 1173.6216 | 0.0102  | 0 R.CGWLDIVALK.Y Carbamidomethyl (C)        |
| 395 - 405   | 1169.6902 | 1168.6829 | 1168.6703 | 0.0126  | 0 K.LDVLSGLPEVK.L                           |
| 406 - 417   | 1305.6760 | 1304.6687 | 1304.6360 | 0.0327  | 0 K.LGVSYNQPDGQK.L                          |
| 418 - 434   | 1917.0439 | 1916.0366 | 1915.9891 | 0.0476  | 0 K.LQSPGDLDTLEQVQVK.Y                      |
| 461 - 482   | 2438.3077 | 2437.3004 | 2437.3116 | -0.0112 | 1 R.YVERIEELVGVVHYIGVGPGR.D                 |
| 465 - 482   | 1891.0881 | 1890.0808 | 1890.0362 | 0.0446  | 0 R.IEELVGVVHYIGVGPGR.D                     |

### Spot 1755

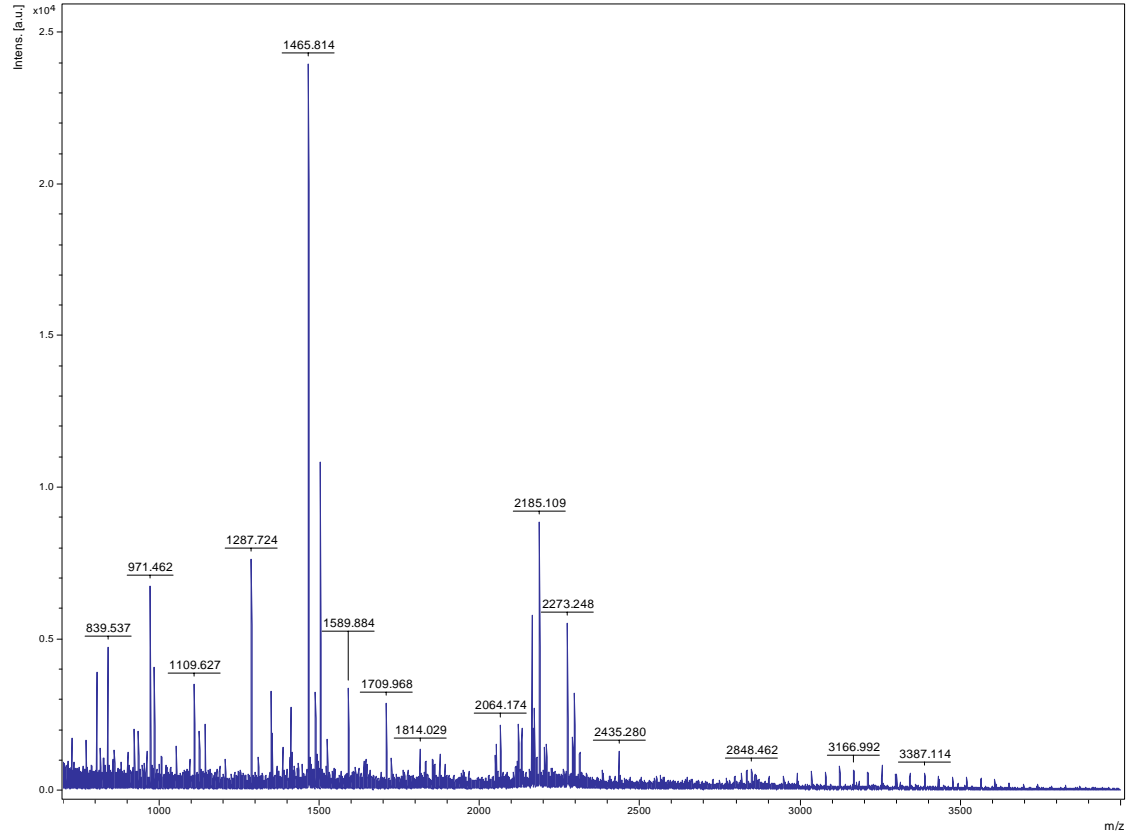

Match to: gi|57283874; Score: 67

#### Matched peptides:

| Start - End | Observed | Mr (expt) | Mr (calc) | Delta | Miss Sequence          |
|-------------|----------|-----------|-----------|-------|------------------------|
| 1 - 8       | 921.47   | 920.46    | 920.43    | 0.04  | 0 MSPQTETK             |
| 19 - 32     | 1814.03  | 1813.03   | 1812.85   | 0.18  | 1 DYKLTYYTPEYETK       |
| 22 - 32     | 1407.78  | 1406.78   | 1406.66   | 0.11  | 0 LTYTPEYETK           |
| 132 - 139   | 985.63   | 984.63    | 984.57    | 0.06  | 1 ALRLEDLR             |
| 140 - 146   | 805.48   | 804.48    | 804.44    | 0.04  | 0 IPPTYSK              |
| 147 - 159   | 1465.81  | 1464.81   | 1464.75   | 0.06  | 0 TFQPPHGIQVER         |
| 165 - 177   | 1502.92  | 1501.91   | 1501.84   | 0.07  | 0 YGRPLLGCTIKPK        |
| 188 - 194   | 971.46   | 970.46    | 970.40    | 0.06  | 0 ACYECLR              |
| 195 - 213   | 2170.07  | 2169.07   | 2168.98   | 0.09  | 1 GGLDFTKDDENVNSQPFMR  |
| 306 - 316   | 1309.71  | 1308.71   | 1308.69   | 0.02  | 1 NHGMHFRVLAK          |
| 320 - 339   | 2050.14  | 2049.14   | 2049.01   | 0.13  | 1 MSGGDHIHAGTVVGKLEGER |

## Spot 1760

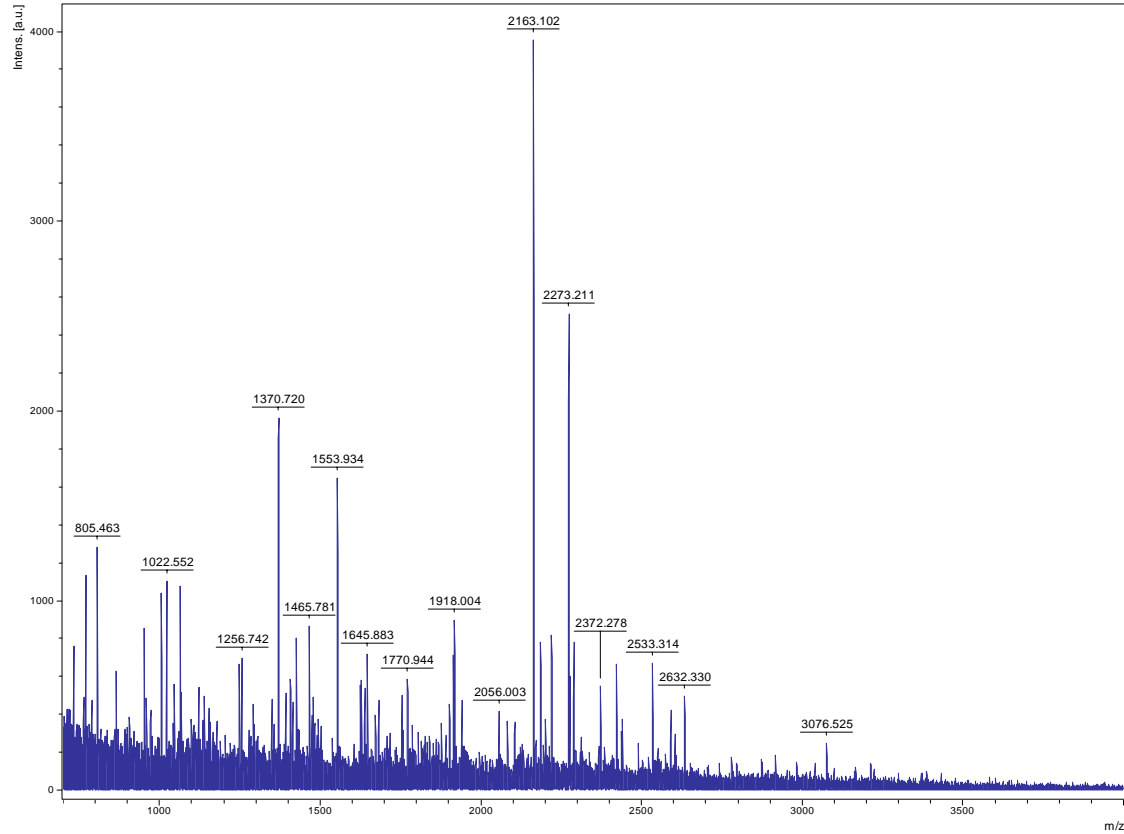

Match to: Q7X9A7\_ORYSA Score: 83 Expect: 0.00036

### Matched peptides:

| Start - End | Observed  | Mr (expt) | Mr (calc) | Delta   | Miss Sequence                  |
|-------------|-----------|-----------|-----------|---------|--------------------------------|
| 46 - 54     | 1022.5666 | 1021.5593 | 1021.4828 | 0.0765  | 0 K.EIAFDQGS.R.S               |
| 64 - 75     | 1138.7123 | 1137.7050 | 1137.6869 | 0.0181  | 0 K.LAAAVAVTLGPR.G             |
| 78 - 88     | 1204.6652 | 1203.6579 | 1203.6135 | 0.0444  | 0 R.NVVLDFGSPK.V               |
| 89 - 98     | 1043.5980 | 1042.5907 | 1042.5771 | 0.0137  | 0 K.VVNDGVTIAR.A               |
| 99 - 115    | 1754.9560 | 1753.9487 | 1753.9032 | 0.0455  | 0 R.AIELADPMENAGAALIR.E        |
| 238 - 250   | 1479.7947 | 1478.7874 | 1478.7405 | 0.0469  | 0 R.GYISPPQFVTNPEK.S           |
| 251 - 259   | 1064.5944 | 1063.5871 | 1063.5298 | 0.0574  | 0 K.SLVEFENAR.I                |
| 267 - 284   | 2082.2668 | 2081.2595 | 2081.2096 | 0.0500  | 1 K.ISSIKHPLLEQTTQLR.A         |
| 272 - 284   | 1553.9327 | 1552.9254 | 1552.8824 | 0.0430  | 0 K.EIHPLEQTTQLR.A             |
| 285 - 308   | 2489.3152 | 2488.3079 | 2488.4628 | -0.1548 | 1 R.APLLIIEADVAGEALATLVVNKLR.G |
| 318 - 324   | 733.4283  | 732.4210  | 732.3554  | 0.0655  | 0 K.APGFGER.R                  |
| 344 - 361   | 1914.1097 | 1913.1024 | 1913.0469 | 0.0555  | 0 K.DLGLLVESTTVEQLGIAR.K       |
| 392 - 408   | 1941.9719 | 1940.9646 | 1940.8963 | 0.0683  | 1 R.ELSQTDSAYDSEKLAER.I        |
| 441 - 464   | 2372.2862 | 2371.2789 | 2371.2171 | 0.0618  | 0 K.NATFAAIEEGIVPGGGAAYVHLSK.F |

# Spot 1763

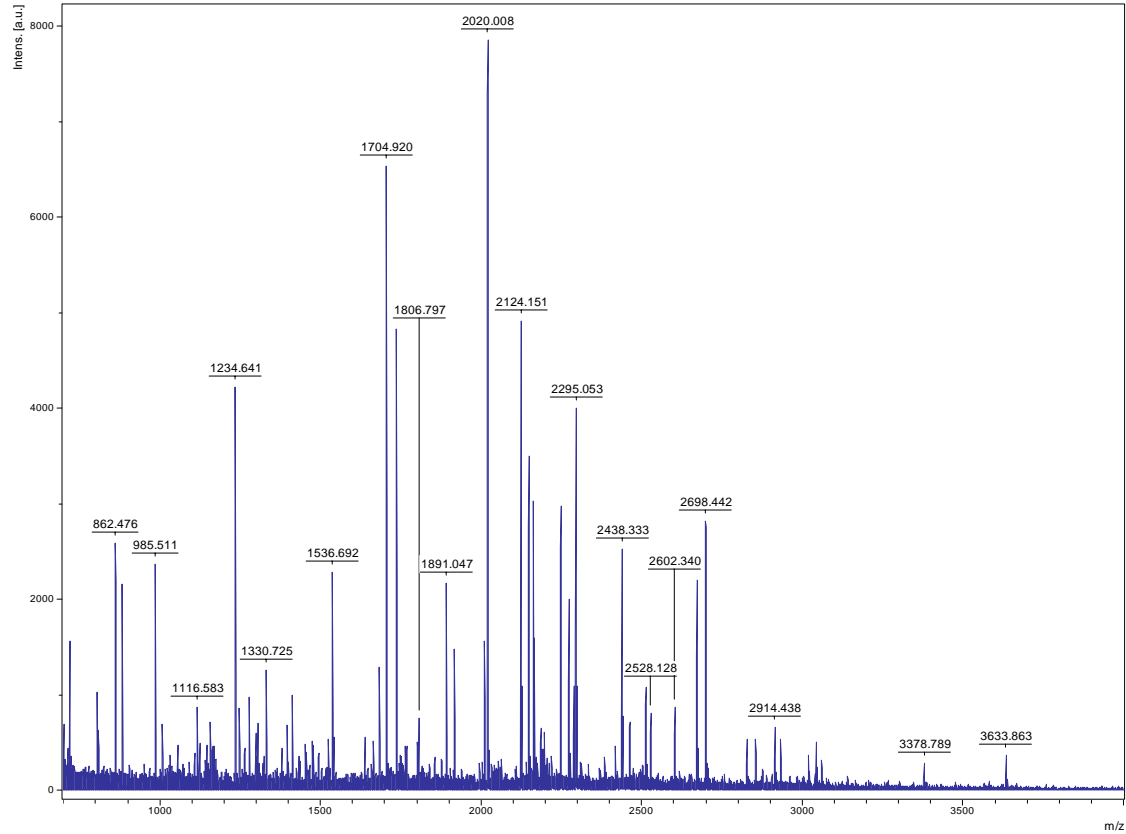

Match to: gj|115451055 Score: 144 Expect: 3.1e-10

## Matched peptides:

| Start - End | Observed  | Mr (expt) | Mr (calc) | Delta   | Miss Sequence                               |
|-------------|-----------|-----------|-----------|---------|---------------------------------------------|
| 56 - 79     | 2417.2204 | 2416.2131 | 2416.1982 | 0.0150  | 1 R.AADRVSALSQVSGVLGSQWGDEGK.G              |
| 60 - 81     | 2189.0986 | 2188.0913 | 2188.1123 | -0.0210 | 1 R.VSALSQVSGVLGSQWGDEGKGL                  |
| 82 - 89     | 882.4774  | 881.4701  | 881.5334  | -0.0633 | 0 K.LVDVLAPR.F                              |
| 96 - 112    | 1763.7729 | 1762.7656 | 1762.7692 | -0.0036 | 0 R.CQGGANAGHTIYNSEGK.K Carbamidomethyl (C) |
| 167 - 181   | 1704.9057 | 1703.8984 | 1703.9107 | -0.0123 | 0 R.AHLLFDLHQAVDGLR.E                       |
| 167 - 181   | 1746.7558 | 1745.7485 | 1745.9212 | -0.1727 | 0 R.AHLLFDLHQAVDGLR.E Acetyl (N-term)       |
| 195 - 204   | 1124.5273 | 1123.5200 | 1123.5444 | -0.0244 | 1 K.RGIGPCYSSK.V Carbamidomethyl (C)        |
| 212 - 224   | 1536.6884 | 1535.6811 | 1535.6861 | -0.0049 | 1 R.VCDLRHMDTFGDKL                          |
| 217 - 230   | 1665.8207 | 1664.8134 | 1664.8232 | -0.0098 | 1 R.HMDTFGDKLDVLFK.D                        |
| 217 - 230   | 1681.8049 | 1680.7976 | 1680.8181 | -0.0205 | 1 R.HMDTFGDKLDVLFK.D Oxidation (M)          |
| 244 - 252   | 1148.5546 | 1147.5473 | 1147.5655 | -0.0182 | 1 K.SMLREEVER.Y                             |
| 255 - 259   | 720.3166  | 719.3093  | 719.3714  | -0.0621 | 1 K.RFAER.L Acetyl (N-term)                 |
| 256 - 278   | 2698.4546 | 2697.4473 | 2697.4125 | 0.0348  | 1 R.FAERLEPFIADTVHLLNESIQQK.K               |
| 260 - 278   | 2195.1600 | 2194.1527 | 2194.1633 | -0.0106 | 0 R.LEPFIADTVHLLNESIQQK.K                   |
| 336 - 354   | 2020.0096 | 2019.0023 | 2018.9948 | 0.0075  | 0 R.VSGGPFPTLFGEEGDLLR.K                    |
| 336 - 355   | 2148.0992 | 2147.0919 | 2147.0898 | 0.0021  | 1 R.VSGGPFPTLFGEEGDLLR.K                    |
| 355 - 368   | 1524.7564 | 1523.7491 | 1523.7514 | -0.0023 | 1 R.KSGMEFGTTTGRPR.R                        |
| 356 - 368   | 1396.6473 | 1395.6400 | 1395.6564 | -0.0164 | 0 K.SGMEFGTTTGRPR.R                         |
| 356 - 368   | 1412.6354 | 1411.6281 | 1411.6514 | -0.0232 | 0 K.SGMEFGTTTGRPR.R Oxidation (M)           |
| 369 - 379   | 1330.7224 | 1329.7151 | 1329.7227 | -0.0076 | 1 R.RCGWLDIVALK.Y Carbamidomethyl (C)       |
| 406 - 417   | 1305.6352 | 1304.6279 | 1304.6360 | -0.0081 | 0 K.LGVSYNQPDGQK.L                          |
| 418 - 434   | 1916.9824 | 1915.9751 | 1915.9891 | -0.0139 | 0 K.LQSPGDLDTLEQVQVK.Y                      |
| 418 - 449   | 3634.0278 | 3633.0205 | 3632.8362 | 0.1844  | 1 K.LQSPGDLDTLEQVQVKYEVLPWQSDISSVR.S        |
| 435 - 449   | 1735.8514 | 1734.8441 | 1734.8577 | -0.0135 | 0 K.YEVLPGWQSDISSVR.S                       |
| 461 - 482   | 2438.3385 | 2437.3312 | 2437.3116 | 0.0196  | 1 R.YVERIEELVGVVHYIGVGPGR.D                 |
| 465 - 482   | 1891.0450 | 1890.0377 | 1890.0362 | 0.0015  | 0 R.IEELVGVVHYIGVGPGR.D                     |



## Spot 1767

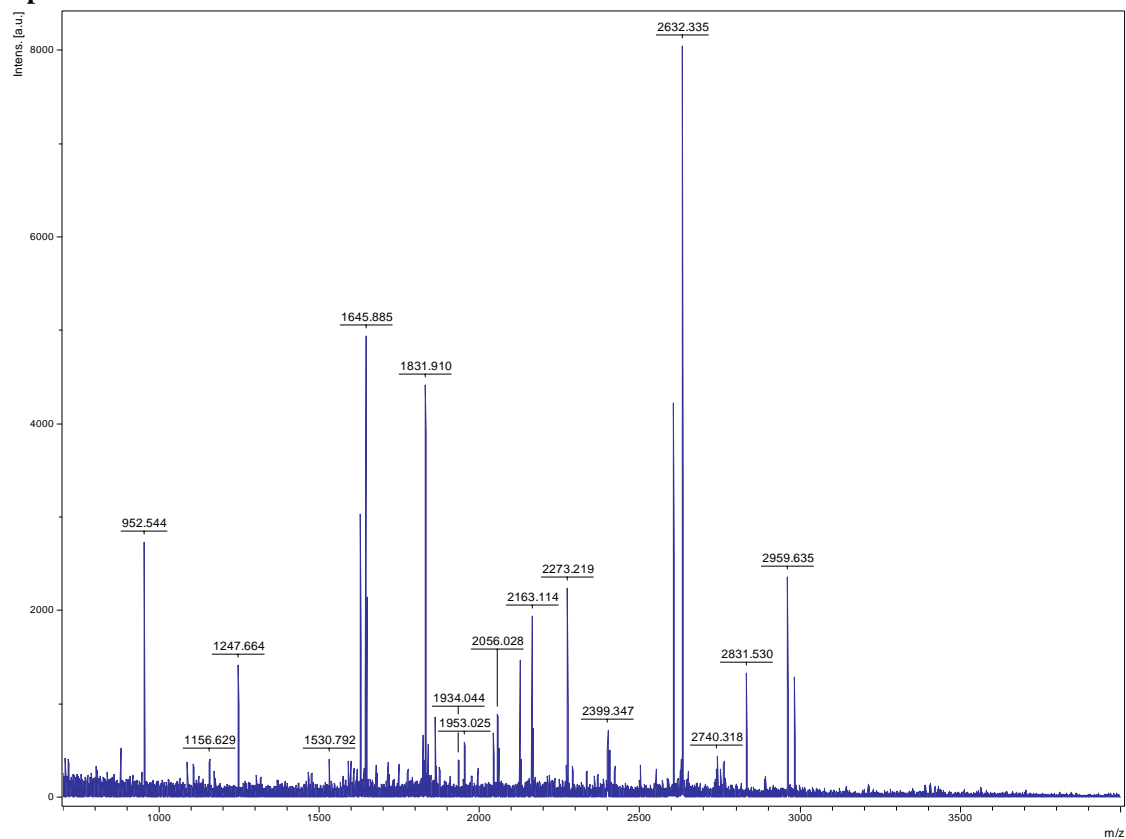

Match to: gi|55296000; Score: 198

### Matched peptides:

| Start - End | Observed | Mr (expt) | Mr (calc) | Delta | Miss Sequence                   |
|-------------|----------|-----------|-----------|-------|---------------------------------|
| 28 - 37     | 1106.56  | 1105.56   | 1105.54   | 0.01  | 0 LNIGGMTQEK Oxidation (M)      |
| 74 - 102    | 2959.63  | 2958.63   | 2958.56   | 0.08  | 1 KNYADASHVSAVILGGGTGVQLFPLTSTR |
| 75 - 102    | 2831.53  | 2830.53   | 2830.46   | 0.07  | 0 NYADASHVSAVILGGGTGVQLFPLTSTR  |
| 103 - 114   | 1247.66  | 1246.66   | 1246.61   | 0.05  | 0 ATPAVPVGGCYR                  |
| 115 - 130   | 1822.94  | 1821.94   | 1821.88   | 0.06  | 0 LIDIPMSNCFNSGINK              |
| 131 - 144   | 1627.88  | 1626.88   | 1626.82   | 0.06  | 0 IFVMTQFNSASLNR                |
| 131 - 144   | 1643.87  | 1642.86   | 1642.81   | 0.05  | 0 IFVMTQFNSASLNR Oxidation (M)  |
| 224 - 242   | 2056.03  | 2055.03   | 2054.93   | 0.09  | 0 HVDDNADITISCAPIDGSR           |
| 257 - 273   | 1934.04  | 1933.04   | 1932.99   | 0.05  | 0 VIQFLKPEGADLESMSK             |
| 289 - 302   | 1645.89  | 1644.88   | 1644.89   | -0.01 | 1 YPYIASMGIVLKK                 |
| 311 - 326   | 1861.02  | 1860.02   | 1859.95   | 0.07  | 1 SKYAHLQDFGSEILPR              |
| 335 - 349   | 1831.91  | 1830.91   | 1830.85   | 0.06  | 0 ACVFTEYWEDIGTIK               |
| 350 - 371   | 2604.31  | 2603.31   | 2603.26   | 0.05  | 1 SFFDANLALTEQPPKFEFYDPK        |
| 372 - 379   | 952.54   | 951.54    | 951.48    | 0.06  | 0 TPFFTSR                       |
| 380 - 388   | 1086.67  | 1085.66   | 1085.62   | 0.04  | 1 YLPPARLEK                     |
| 391 - 417   | 2981.51  | 2980.50   | 2980.43   | 0.08  | 1 IKDAIISDGCFSFECTIEHSVIGISSR   |
| 393 - 417   | 2740.32  | 2739.32   | 2739.25   | 0.07  | 0 DAISDGCFSFECTIEHSVIGISSR      |
| 474 - 496   | 2632.34  | 2631.33   | 2631.26   | 0.08  | 0 NVIIANTQGVQESDHPEEGYIR        |

### Spot 1768

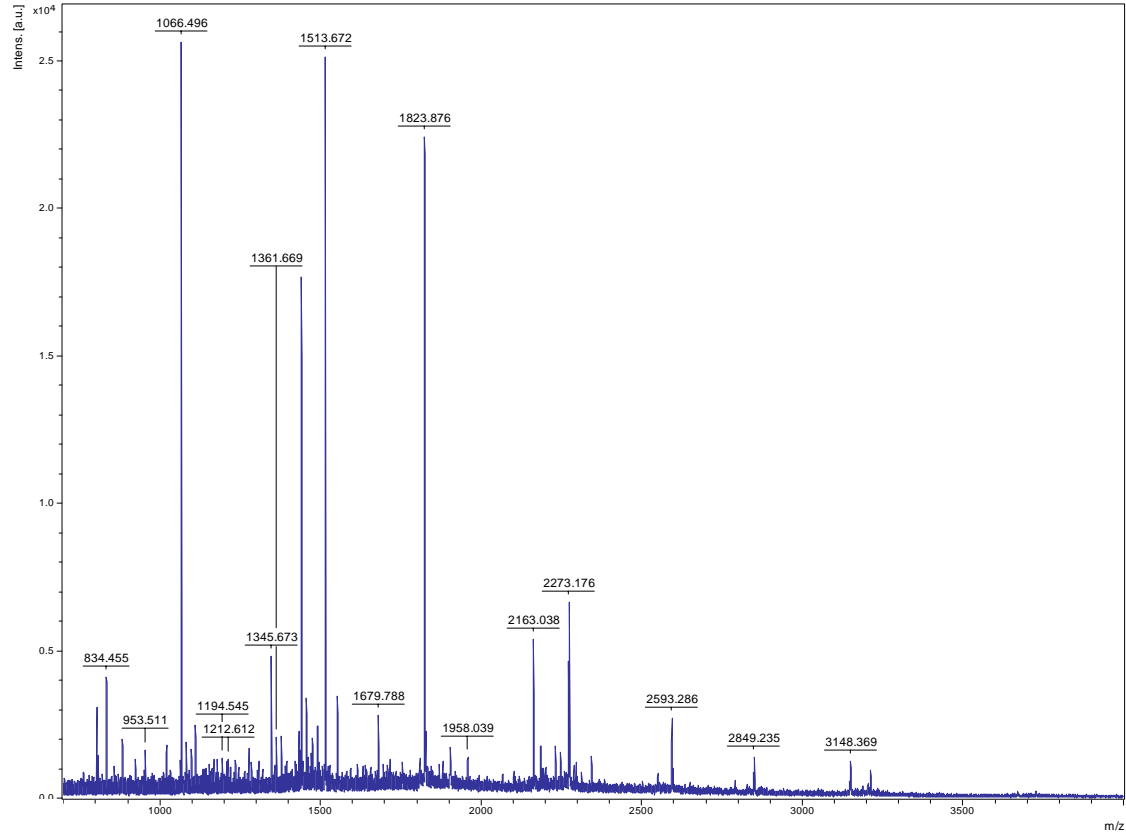

Match to: gi|56202334 Score: 74 Expect: 0.0027

#### Matched peptides:

| Start - End | Observed  | Mr (expt) | Mr (calc) | Delta   | Miss Sequence                                               |
|-------------|-----------|-----------|-----------|---------|-------------------------------------------------------------|
| 40 - 50     | 1361.6966 | 1360.6893 | 1360.6200 | 0.0693  | 0 K.QGGWYNFLHEK.V Pyro-glu (N-term Q)                       |
| 40 - 50     | 1378.6771 | 1377.6698 | 1377.6465 | 0.0233  | 0 K.QGGWYNFLHEK.V                                           |
| 97 - 118    | 2593.2654 | 2592.2581 | 2592.3118 | -0.0537 | 1 K.SLIEAFHDKNVECLADIVINHR.C Carbamidomethyl (C)            |
| 106 - 118   | 1552.8188 | 1551.8115 | 1551.7827 | 0.0288  | 0 K.NVECLADIVINHR.C Carbamidomethyl (C)                     |
| 127 - 140   | 1456.7959 | 1455.7886 | 1455.6452 | 0.1434  | 0 R.GVYCVFEGGTPDGR.L                                        |
| 127 - 140   | 1513.6918 | 1512.6845 | 1512.6667 | 0.0179  | 0 R.GVYCVFEGGTPDGR.L Carbamidomethyl (C)                    |
| 141 - 159   | 2229.8986 | 2228.8913 | 2228.9103 | -0.0189 | 0 R.LDWGPMICSDDTQYSNGR.G Carbamidomethyl (C)                |
| 141 - 159   | 2245.8951 | 2244.8878 | 2244.9052 | -0.0174 | 0 R.LDWGPMICSDDTQYSNGR.G Carbamidomethyl (C); Oxidation (M) |
| 163 - 180   | 1823.8787 | 1822.8714 | 1822.8598 | 0.0117  | 0 R.DTGAGFGAAPPDIDLNPR.V                                    |
| 184 - 193   | 1345.6953 | 1344.6880 | 1344.6826 | 0.0054  | 0 R.ELTDWLNWLR.T                                            |
| 208 - 215   | 834.3981  | 833.3908  | 833.4395  | -0.0487 | 0 K.GYSAPLAR.I                                              |
| 242 - 254   | 1490.7466 | 1489.7393 | 1489.8517 | -0.1124 | 1 R.HRLDPVALAVPFR.Q                                         |

## Spot 1771

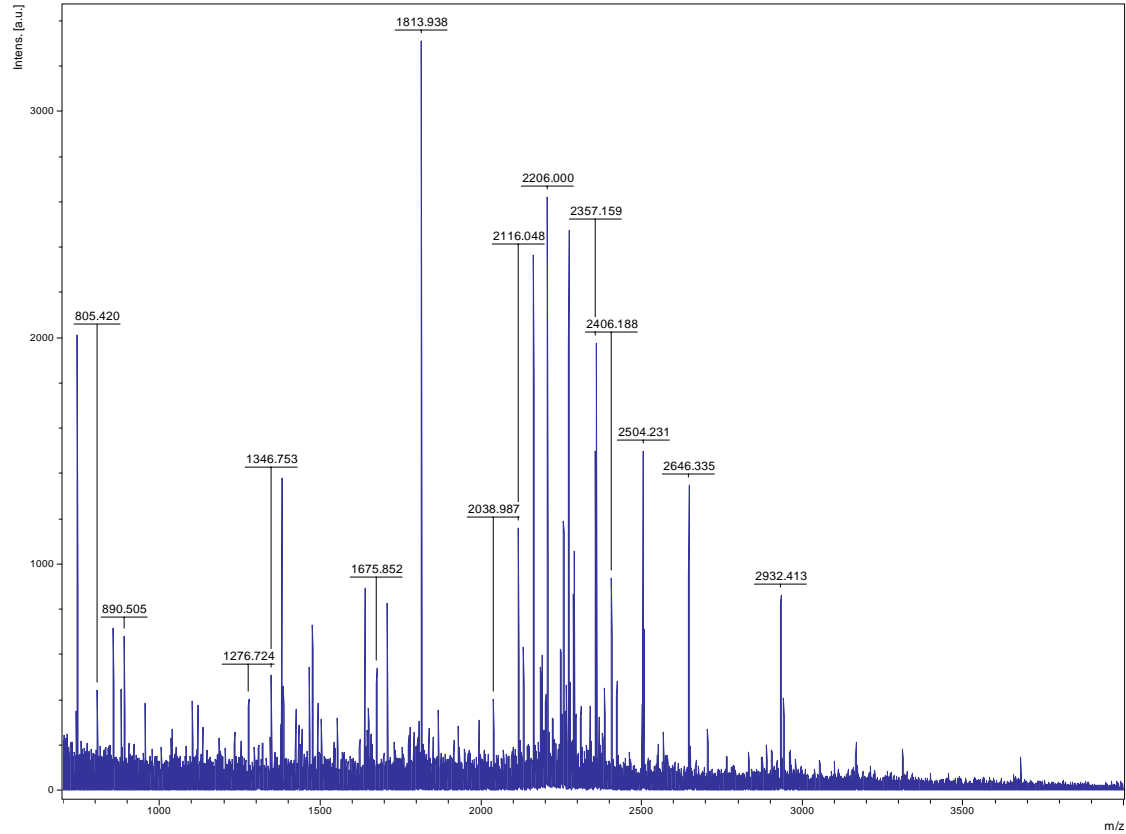

Match to: gi|38344860; Score: 119

### Matched peptides:

| Start - End | Observed | Mr (expt) | Mr (calc) | Delta | Miss Sequence                          |
|-------------|----------|-----------|-----------|-------|----------------------------------------|
| 33 - 55     | 2257.19  | 2256.18   | 2256.20   | -0.01 | 0 STLTDLSLVAAAGHIAQEVAGDVR             |
| 94 - 120    | 2932.41  | 2931.41   | 2931.42   | -0.01 | 0 DGNEYLINLIDSPGHVDFSSEVTAALR          |
| 121 - 144   | 2646.33  | 2645.33   | 2645.34   | -0.01 | 0 ITDGALVVVDCIEGVCVQTETVLR             |
| 163 - 180   | 2206.00  | 2205.00   | 2205.00   | -0.01 | 0 CFLELQVEGEEAYQTFSR                   |
| 270 - 280   | 1387.65  | 1386.64   | 1386.66   | -0.02 | 0 GFVQFCYEPIK                          |
| 349 - 368   | 2357.16  | 2356.16   | 2356.17   | -0.01 | 1 YRVENLYEGPLDDVYATAIR                 |
| 483 - 490   | 890.51   | 889.50    | 889.50    | 0.00  | 0 FSVSPVVR                             |
| 544 - 565   | 2406.19  | 2405.19   | 2405.19   | -0.01 | 0 DLQEDFMGGAEIIVSPPVVSFR               |
| 544 - 565   | 2422.18  | 2421.17   | 2421.19   | -0.01 | 0 DLQEDFMGGAEIIVSPPVVSFR Oxidation (M) |
| 587 - 606   | 2248.08  | 2247.08   | 2247.08   | -0.01 | 0 LYMEARPLEEGLAEAIDDGR                 |
| 713 - 724   | 1346.75  | 1345.75   | 1345.77   | -0.02 | 0 VIYASQLTAKPR                         |
| 725 - 751   | 2940.57  | 2939.57   | 2939.60   | -0.03 | 0 LLEPVYLVVEIQAPENALGGIYGVLNQK         |
| 753 - 770   | 2116.05  | 2115.05   | 2115.06   | -0.01 | 0 GHVFEEMQRPGTPLYNIK                   |
| 753 - 770   | 2132.03  | 2131.03   | 2131.05   | -0.02 | 0 GHVFEEMQRPGTPLYNIK Oxidation (M)     |
| 771 - 786   | 1813.94  | 1812.94   | 1812.94   | -0.01 | 0 AYLPIVIESFGFSSQLR                    |

### Spot 1775

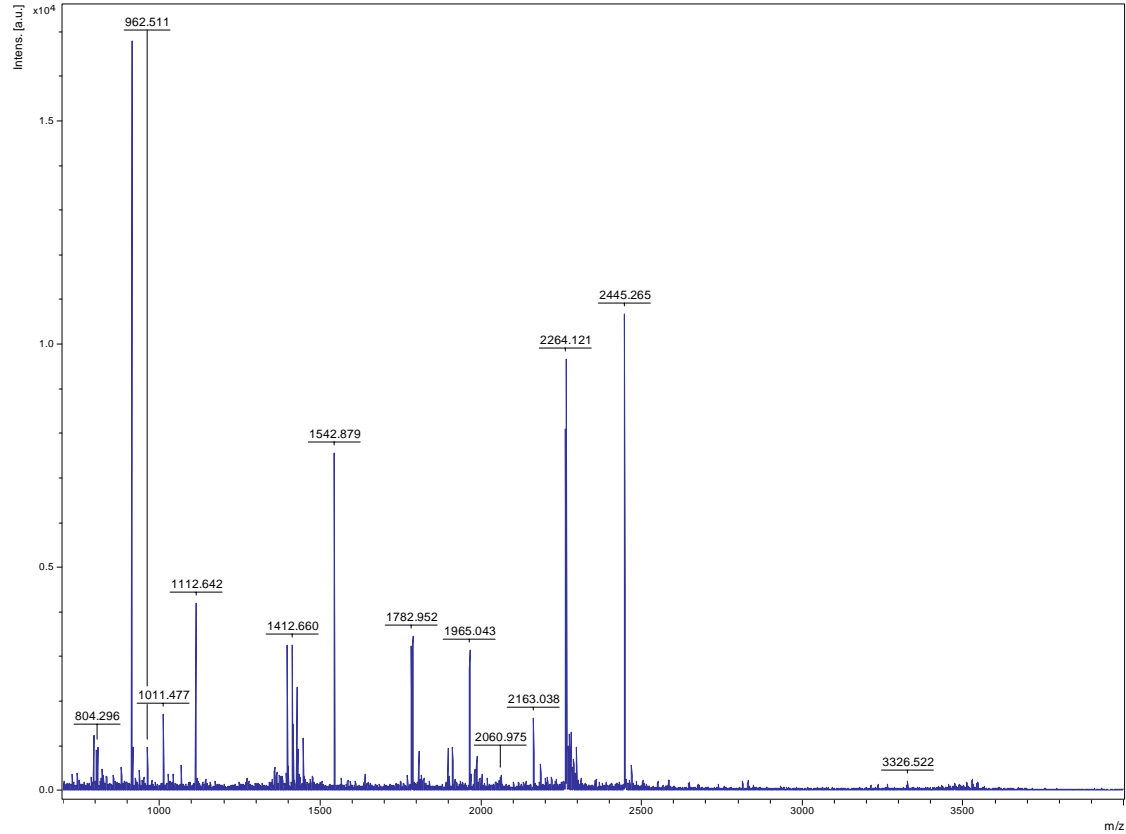

Match to: gi|49388150; Score: 155

#### Matched peptides:

| Start - End | Observed | Mr (expt) | Mr (calc) | Delta | Miss Sequence                      |
|-------------|----------|-----------|-----------|-------|------------------------------------|
| 11 - 32     | 2445.26  | 2444.26   | 2444.26   | -0.00 | 0 SFVEVAPGSHFPIQNLPGVFRR           |
| 77 - 92     | 1911.04  | 1910.04   | 1909.92   | -0.12 | 0 QETLNMFLGMGRPAWK 2 Oxidation (M) |
| 101 - 110   | 1112.64  | 1111.64   | 1111.62   | -0.02 | 0 ILSADEPVLRR                      |
| 101 - 116   | 1782.95  | 1781.95   | 1781.95   | -0.00 | 1 ILSADEVLRDNEALK                  |
| 156 - 175   | 2264.12  | 2263.12   | 2263.13   | -0.01 | 0 GPQTPVNPWFQLPVGYHGR              |
| 176 - 190   | 1542.88  | 1541.88   | 1541.88   | -0.00 | 0 ASSVIVSGTDIIRPK                  |
| 191 - 207   | 1787.85  | 1786.85   | 1786.84   | -0.01 | 0 GQGHPTGDSRPYFGPSK                |
| 251 - 266   | 1784.94  | 1783.94   | 1783.95   | -0.01 | 0 DIQAWETIPLGPFLGK                 |
| 292 - 303   | 1396.66  | 1395.66   | 1395.69   | -0.03 | 0 QEPELPYLAEK Pyro-glu (N-term Q)  |
| 304 - 319   | 1965.04  | 1964.04   | 1964.05   | -0.01 | 0 NHVNYDIPLEVWIKPK                 |
| 385 - 393   | 962.51   | 961.51    | 961.48    | -0.03 | 0 EISVGNSTR                        |
| 394 - 409   | 1897.89  | 1896.89   | 1896.90   | -0.01 | 1 KFLEDGDEVILTACCK                 |
| 410 - 423   | 1446.63  | 1445.62   | 1445.62   | -0.00 | 0 GEGYNVGFGTCTGK                   |

## Spot 1778

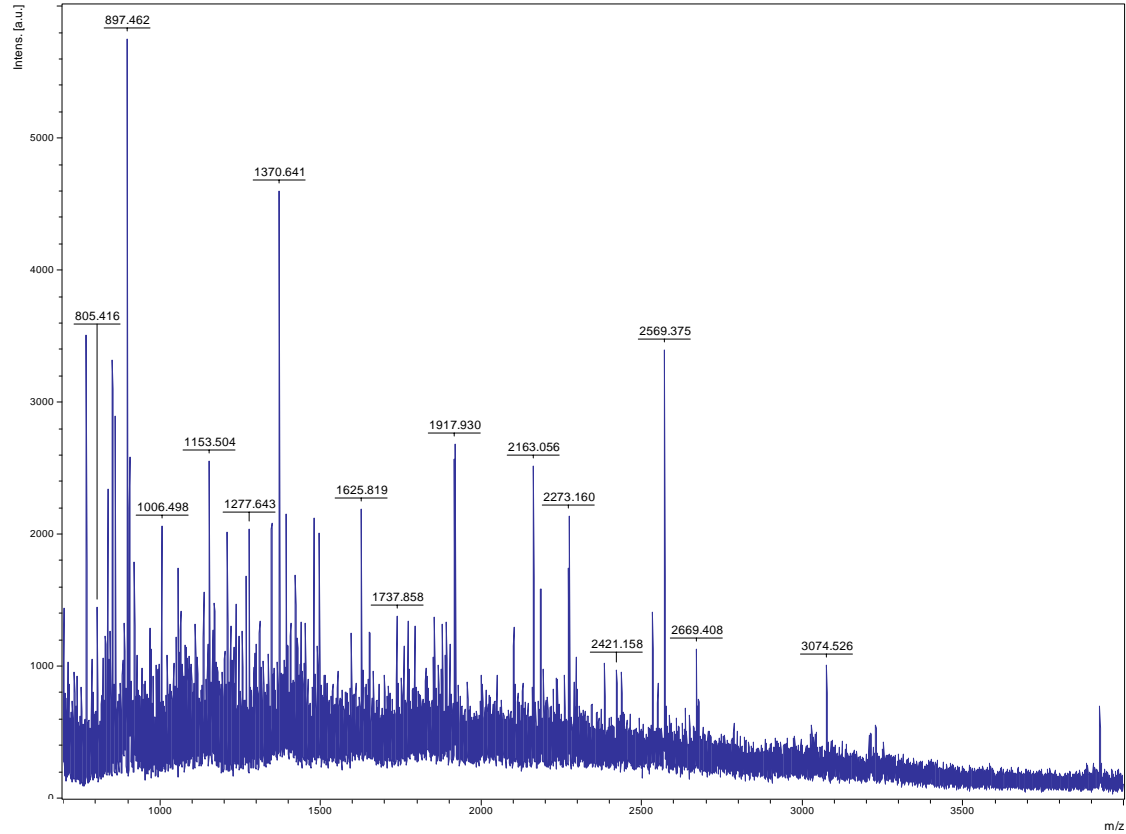

Match to: gi|50944557 Score: 70 Expect: 0.0075

### Matched peptides:

| Start - End | Observed  | Mr (expt) | Mr (calc) | Delta   | Miss Sequence                                  |
|-------------|-----------|-----------|-----------|---------|------------------------------------------------|
| 2 - 12      | 1231.6114 | 1230.6041 | 1230.7084 | -0.1043 | 1 M.NVLASKIFPSR.S                              |
| 27 - 37     | 1149.5924 | 1148.5851 | 1148.5673 | 0.0178  | 1 K.ATIDDAKNSSK.N                              |
| 70 - 81     | 1256.7247 | 1255.7174 | 1255.7036 | 0.0138  | 0 R.AKPAVPLGANR.L                              |
| 98 - 111    | 1625.8655 | 1624.8582 | 1624.8573 | 0.0010  | 0 K.IYVLTQFNSASLNR.H                           |
| 183 - 188   | 771.3576  | 770.3503  | 770.4187  | -0.0684 | 0 K.FIQAHR.E                                   |
| 189 - 205   | 1890.9534 | 1889.9461 | 1889.9040 | 0.0421  | 1 R.ETDSDITVAALPMDEKR.A                        |
| 214 - 228   | 1759.9430 | 1758.9357 | 1758.9151 | 0.0206  | 1 K.IDEGRIVEFAEKPK.G                           |
| 251 - 273   | 2669.2151 | 2668.2078 | 2668.4154 | -0.2075 | 1 K.EMPYIASMGIVISKVNLQLLR.E                    |
| 325 - 335   | 1370.6889 | 1369.6816 | 1369.6666 | 0.0150  | 0 K.KPVPDFSFYDR.S                              |
| 351 - 371   | 2235.1357 | 2234.1284 | 2234.0922 | 0.0362  | 1 K.VLDADVTDVIGEGCVIKNCK.I Carbamidomethyl (C) |
| 413 - 426   | 1434.7989 | 1433.7916 | 1433.7925 | -0.0008 | 1 K.GGIPIGIKNCHIR.R                            |
| 442 - 461   | 2295.0614 | 2294.0541 | 2294.1542 | -0.1001 | 1 K.IINVDNVQEAARETDGYFIK.S                     |

### Spot 1784

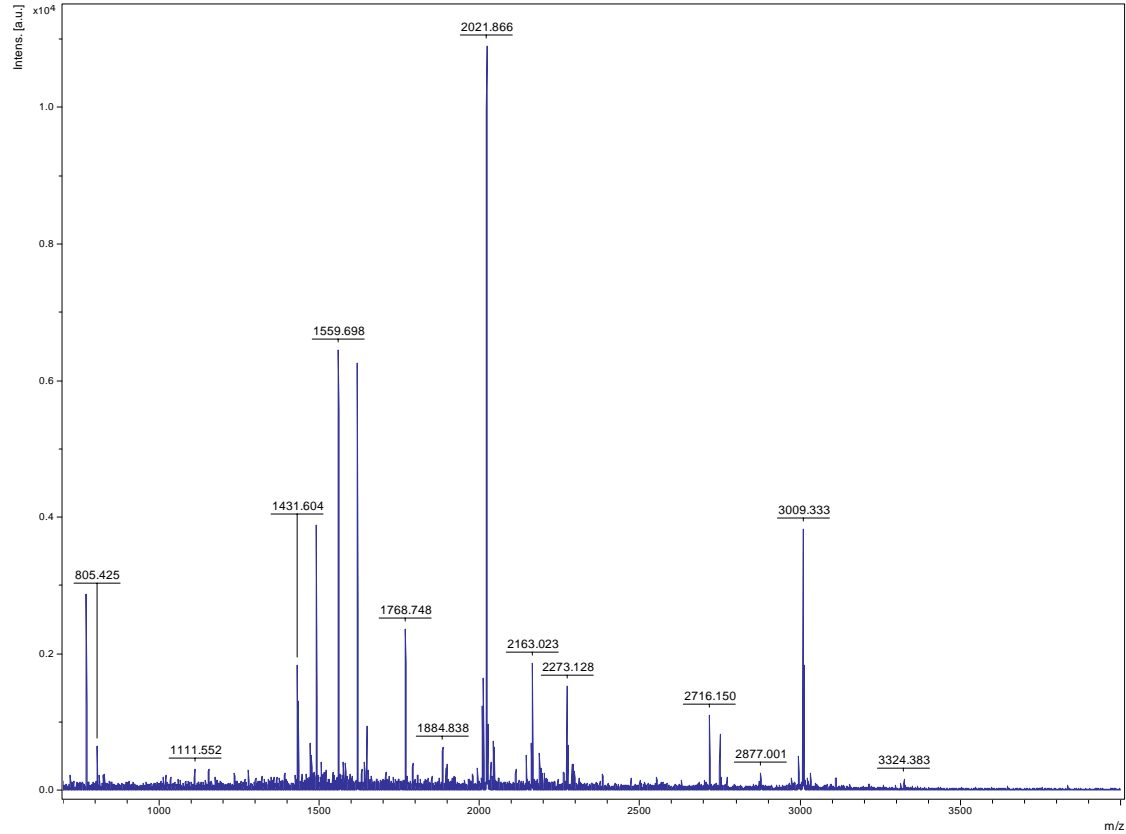

Match to: gi|32352182 Score: 82

#### Matched peptides:

| Start - End | Observed  | Mr (expt) | Mr (calc) | Delta   | Miss Sequence                            |
|-------------|-----------|-----------|-----------|---------|------------------------------------------|
| 152 - 165   | 1617.7024 | 1616.6951 | 1616.7066 | -0.0115 | 1 R.RQEEEEYSYGSYGR.K                     |
| 153 - 165   | 1472.5752 | 1471.5679 | 1471.5851 | -0.0172 | 0 K.QQEEEEYSYGSYGR.K Pyro-glu (N-term Q) |
| 153 - 165   | 1489.6071 | 1488.5998 | 1488.6116 | -0.0119 | 0 K.QQEEEEYSYGSYGR.K                     |
| 212 - 229   | 2021.8662 | 2020.8589 | 2020.8762 | -0.0172 | 0 R.KPQEEESYGSYGSYGR.K                   |
| 230 - 258   | 3009.3328 | 3008.3255 | 3008.3284 | -0.0029 | 0 R.KPQAEESYGSYGSYGRPQGGEEYSGGGYGR.K     |
| 260 - 273   | 1431.6042 | 1430.5970 | 1430.6062 | -0.0092 | 0 K.AQEEESYGSAGYGR.K                     |
| 260 - 274   | 1559.6984 | 1558.6911 | 1558.7011 | -0.0100 | 1 K.AQEEESYGSAGYGR.K.T                   |
| 275 - 291   | 1768.7482 | 1767.7409 | 1767.7587 | -0.0178 | 1 K.TEEESYGGGSYGYGKK.A                   |
| 376 - 381   | 825.3593  | 824.3520  | 824.3300  | 0.0219  | 1 R.RQEYDD.-                             |

### Spot 1790

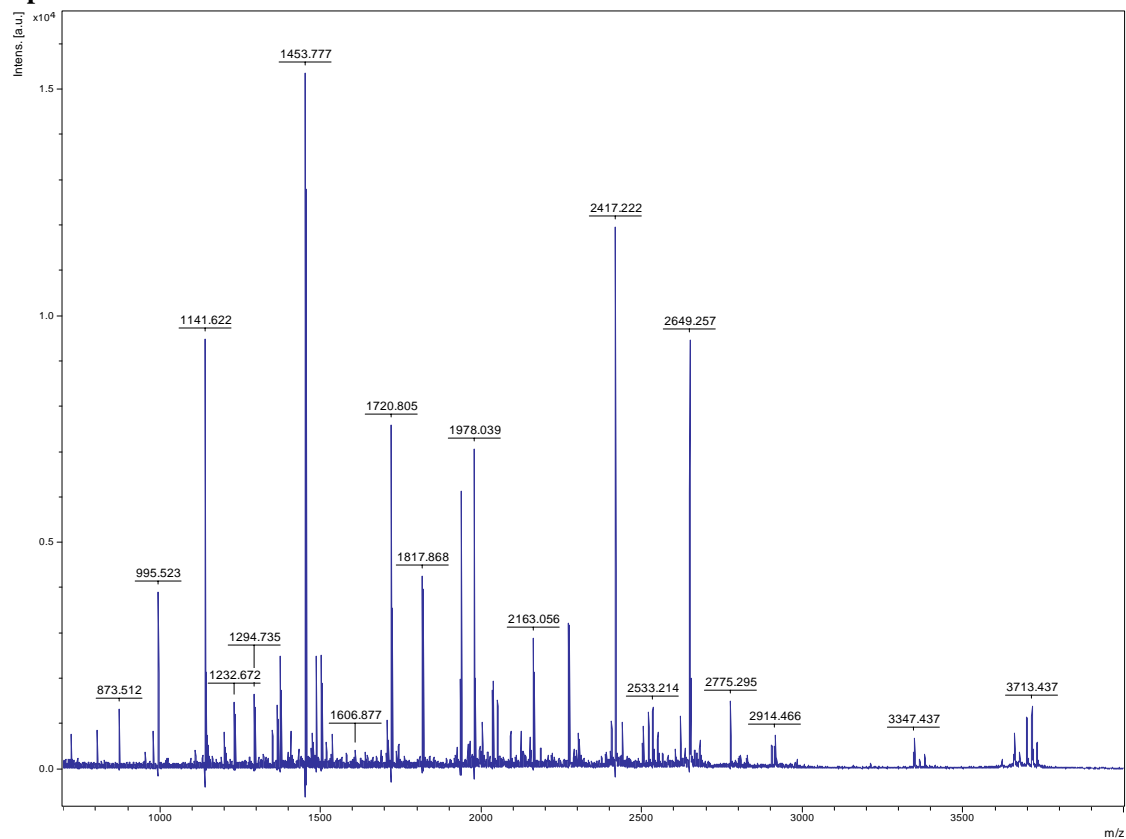

Match to: gi|3024122; Score: 139

#### Matched peptides:

| Start - End | Observed | Mr (expt) | Mr (calc) | Delta | Miss Sequence                                        |
|-------------|----------|-----------|-----------|-------|------------------------------------------------------|
| 50 - 62     | 1470.73  | 1469.73   | 1469.73   | 0.00  | 0 TNMVMVFGEITTK                                      |
| 77 - 91     | 1535.73  | 1534.73   | 1534.73   | 0.00  | 0 GIGFVSDVGLDADR                                     |
| 94 - 115    | 2417.28  | 2416.27   | 2416.25   | 0.02  | 0 VLVNIEQQSPDIAQGVHGHFTK                             |
| 116 - 149   | 3697.85  | 3696.85   | 3696.76   | 0.09  | 0 RPEEIGAGDQGHMFGYATDETPELMPLSHVLATK                 |
| 116 - 149   | 3713.84  | 3712.84   | 3712.75   | 0.09  | 0 RPEEIGAGDQGHMFGYATDETPELMPLSHVLATK Oxidation (M)   |
| 116 - 149   | 3729.86  | 3728.86   | 3728.74   | 0.11  | 0 RPEEIGAGDQGHMFGYATDETPELMPLSHVLATK 2 Oxidation (M) |
| 159 - 171   | 1502.75  | 1501.75   | 1501.75   | 0.00  | 1 KNGTCAWLRPDGK                                      |
| 160 - 171   | 1374.66  | 1373.66   | 1373.65   | 0.01  | 0 NGTCAWLRPDGK                                       |
| 190 - 213   | 2649.35  | 2648.35   | 2648.33   | 0.02  | 0 VHTVLISTQHDETVTNDIEAADLK                           |
| 240 - 254   | 1453.76  | 1452.76   | 1452.75   | 0.01  | 0 FVIGGPHGDAGLTGR                                    |
| 240 - 255   | 1581.82  | 1580.82   | 1580.84   | -0.02 | 1 FVIGGPHGDAGLTGRK                                   |
| 255 - 275   | 2092.06  | 2091.06   | 2091.05   | 0.01  | 1 KIIDTYGGWGAHGGGAFSGK                               |
| 256 - 275   | 1963.99  | 1962.99   | 1962.96   | 0.03  | 0 IIIDTYGGWGAHGGGAFSGK                               |
| 256 - 279   | 2405.18  | 2404.18   | 2404.18   | -0.00 | 1 IIIDTYGGWGAHGGGAFSGKDKPTK                          |
| 294 - 302   | 873.54   | 872.54    | 872.51    | 0.03  | 0 SIVASGLAR                                          |
| 330 - 337   | 955.60   | 954.60    | 954.57    | 0.02  | 1 IPDKEILK                                           |
| 366 - 374   | 979.49   | 978.49    | 978.47    | 0.02  | 0 TAAYGHFGR                                          |

### Spot 1799

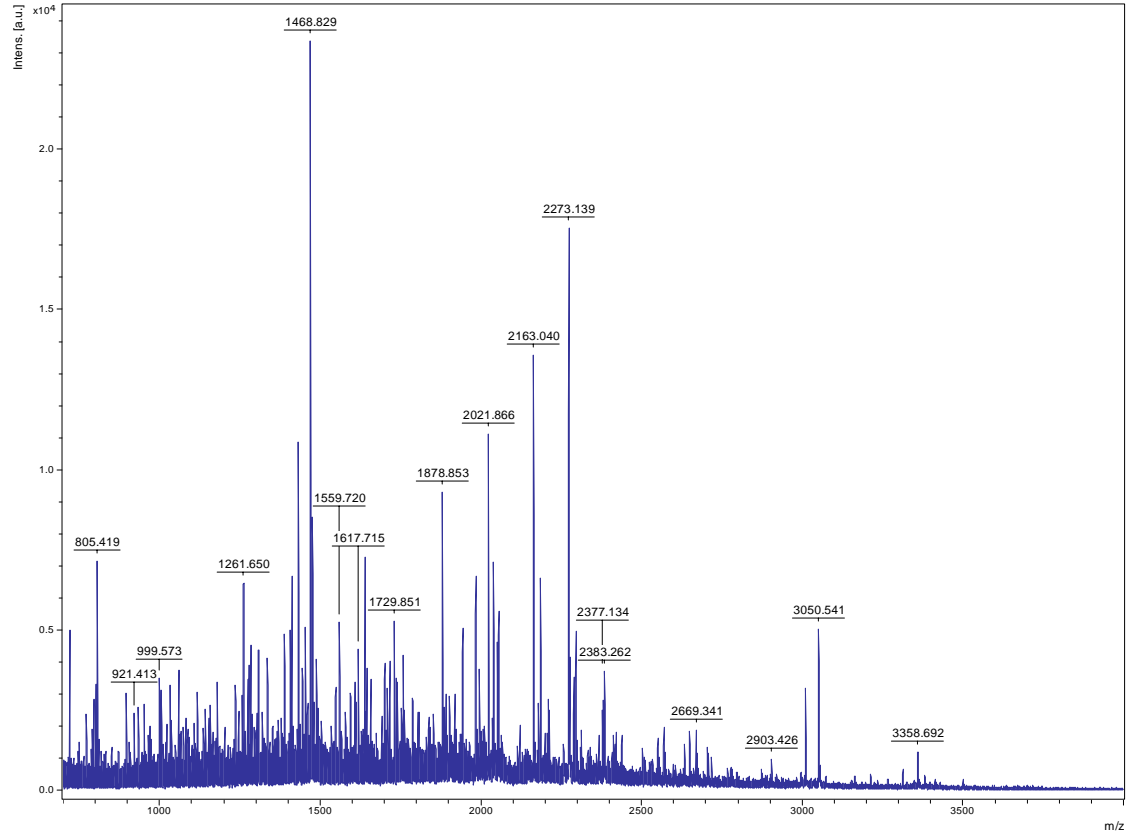

Match to: gi|108706593 Score: 73 Expect: 0.0035

#### Matched peptides:

| Start - End | Observed  | Mr (expt) | Mr (calc) | Delta   | Miss Sequence                                   |
|-------------|-----------|-----------|-----------|---------|-------------------------------------------------|
| 18 - 34     | 1805.9696 | 1804.9623 | 1804.9822 | -0.0198 | 0 R.AASEPLIVEEIVDPPK.A                          |
| 18 - 39     | 2438.2839 | 2437.2767 | 2437.3103 | -0.0337 | 1 R.AASEPLIVEEIVDPPKAYEIR.I                     |
| 42 - 57     | 1983.9303 | 1982.9230 | 1982.9706 | -0.0476 | 0 K.IICTSLCHTDVTLWHK.V 2 Carbamidomethyl (C)    |
| 58 - 64     | 801.4258  | 800.4185  | 800.4181  | 0.0004  | 0 K.VDPAPPR.I                                   |
| 170 - 187   | 1878.8535 | 1877.8462 | 1877.8698 | -0.0236 | 0 K.IACLLGCCGGTGVGAAWRL.L 3 Carbamidomethyl (C) |
| 221 - 230   | 1082.5773 | 1081.5700 | 1081.6131 | -0.0431 | 0 K.IIGVDLNPKE                                  |
| 231 - 251   | 2295.1306 | 2294.1233 | 2294.1066 | 0.0168  | 1 K.EEVGKEFGVTFVNPNSQLGDK.S                     |
| 236 - 251   | 1752.8323 | 1751.8250 | 1751.8366 | -0.0116 | 0 K.EFGVTFVNPNSQLGDK.S                          |
| 300 - 315   | 1884.9032 | 1883.8959 | 1883.9127 | -0.0168 | 0 K.DSQPLCLPSFEFLGKC.C Carbamidomethyl (C)      |
| 329 - 337   | 999.5734  | 998.5661  | 998.5648  | 0.0013  | 0 K.TDIPILAEK.C                                 |
| 338 - 347   | 1236.5903 | 1235.5831 | 1235.5889 | -0.0059 | 1 K.CMNKELEK.L                                  |
| 373 - 379   | 965.4847  | 964.4775  | 964.4510  | 0.0264  | 0 R.CIHWMDK.- Carbamidomethyl (C)               |



# Spot 1800

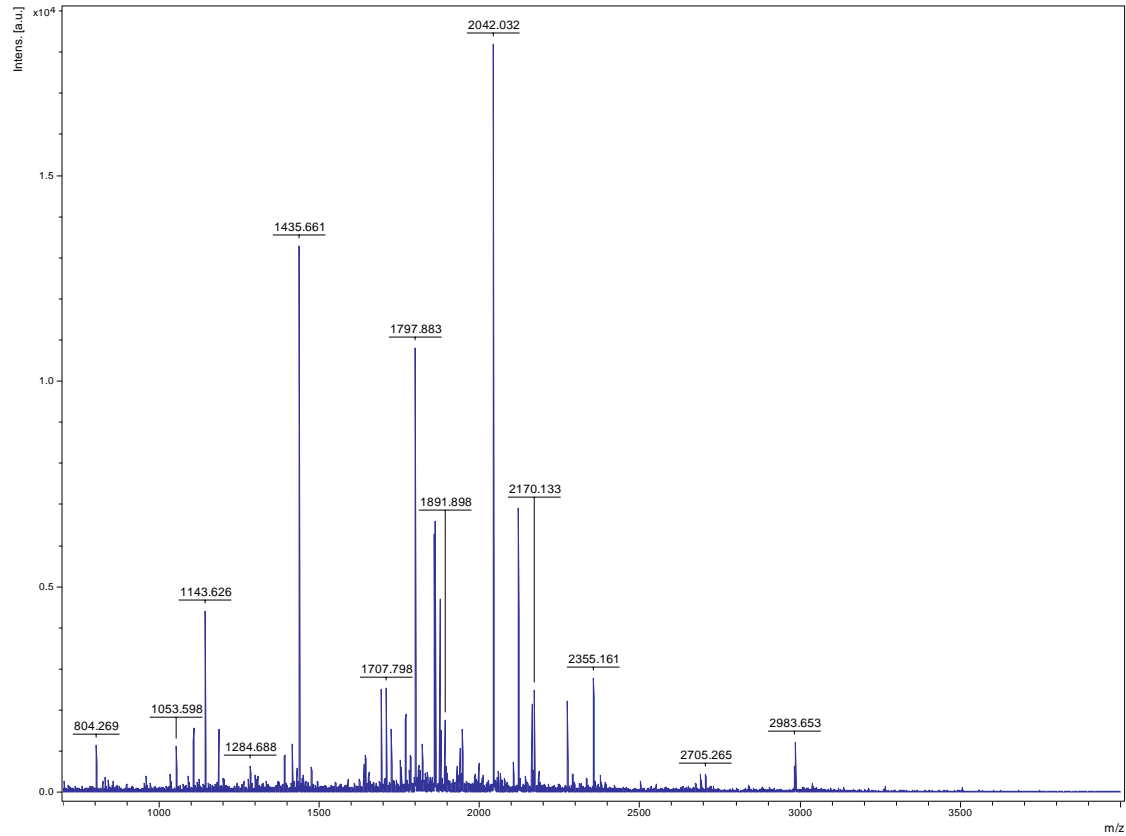

Match to: gi|50910077 Score: 101 Expect: 5.6e-06

## Matched peptides:

| Start - End | Observed  | Mr (expt) | Mr (calc) | Delta   | Miss Sequence               |                                      |
|-------------|-----------|-----------|-----------|---------|-----------------------------|--------------------------------------|
| 1 - 23      | 2289.1068 | 2288.0995 | 2288.1318 | -0.0323 | 0 -.MASLASASATSLVFSTSSSKPRL | Oxidation (M)                        |
| 67 - 83     | 1810.0168 | 1809.0095 | 1808.9645 | 0.0450  | 0 R.TKPHVNIGTIGHVDHGK.T     |                                      |
| 104 - 115   | 1435.5929 | 1434.5856 | 1434.6626 | -0.0770 | 1 K.KYDEIDAAPEER.A          |                                      |
| 105 - 115   | 1307.4281 | 1306.4208 | 1306.5677 | -0.1469 | 0 K.YDEIDAAPEER.A           |                                      |
| 118 - 133   | 1797.9544 | 1796.9471 | 1796.8792 | 0.0679  | 0 R.GITINTATVEYETETR.H      |                                      |
| 134 - 148   | 1753.9112 | 1752.9039 | 1752.7678 | 0.1361  | 0 R.HYAHVDCPGHADVVK.N       | Acetyl (N-term)                      |
| 134 - 148   | 1768.8706 | 1767.8633 | 1767.7787 | 0.0846  | 0 R.HYAHVDCPGHADVVK.N       | Carbamidomethyl (C)                  |
| 196 - 213   | 2170.1282 | 2169.1209 | 2169.1164 | 0.0045  | 1 K.KDQVDEELLQLVELEVR.E     |                                      |
| 197 - 213   | 2042.0929 | 2041.0856 | 2041.0215 | 0.0642  | 0 K.DQVDEELLQLVELEVR.E      |                                      |
| 214 - 235   | 2355.0670 | 2354.0597 | 2354.1528 | -0.0931 | 0 R.ELLSSEYDGDVPIVAGSALK.A  |                                      |
| 274 - 292   | 2121.1489 | 2120.1416 | 2120.1153 | 0.0263  | 0 R.QTDLPLFLAVDEVFSTIGR.G   |                                      |
| 318 - 332   | 1784.9598 | 1783.9525 | 1783.8232 | 0.1293  | 1 R.ETRNCVTGVEMFQK.T        | Acetyl (N-term)                      |
| 333 - 348   | 1691.8634 | 1690.8561 | 1690.8018 | 0.0543  | 0 K.TMDDAMAGDNVGLLLR.G      |                                      |
| 333 - 348   | 1723.8479 | 1722.8406 | 1722.7916 | 0.0490  | 0 K.TMDDAMAGDNVGLLLR.G      | 2 Oxidation (M)                      |
| 388 - 402   | 1929.9890 | 1928.9817 | 1928.9144 | 0.0673  | 0 R.HSPFFPGYRPQFYMR.T       |                                      |
| 388 - 402   | 1945.9754 | 1944.9681 | 1944.9093 | 0.0588  | 0 R.HSPFFPGYRPQFYMR.T       | Oxidation (M)                        |
| 418 - 429   | 1413.5555 | 1412.5482 | 1412.5370 | 0.0112  | 1 K.DEEAKMCPGDR.V           | 2 Oxidation (M)                      |
| 430 - 447   | 2104.0980 | 2103.0907 | 2103.0526 | 0.0382  | 1 R.VKMVVELIQPVACEQGMRF     | Acetyl (N-term); 2 Oxidation (M)     |
| 432 - 447   | 1844.9762 | 1843.9689 | 1843.8994 | 0.0696  | 0 K.MVVVELIQPVACEQGMRF      | Acetyl (N-term)                      |
| 432 - 447   | 1859.9857 | 1858.9784 | 1858.9103 | 0.0681  | 0 K.MVVVELIQPVACEQGMRF      | Carbamidomethyl (C)                  |
| 432 - 447   | 1875.9903 | 1874.9830 | 1874.9052 | 0.0778  | 0 K.MVVVELIQPVACEQGMRF      | Carbamidomethyl (C); Oxidation (M)   |
| 432 - 447   | 1891.9808 | 1890.9735 | 1890.9001 | 0.0734  | 0 K.MVVVELIQPVACEQGMRF      | Carbamidomethyl (C); 2 Oxidation (M) |

# Spot 1805

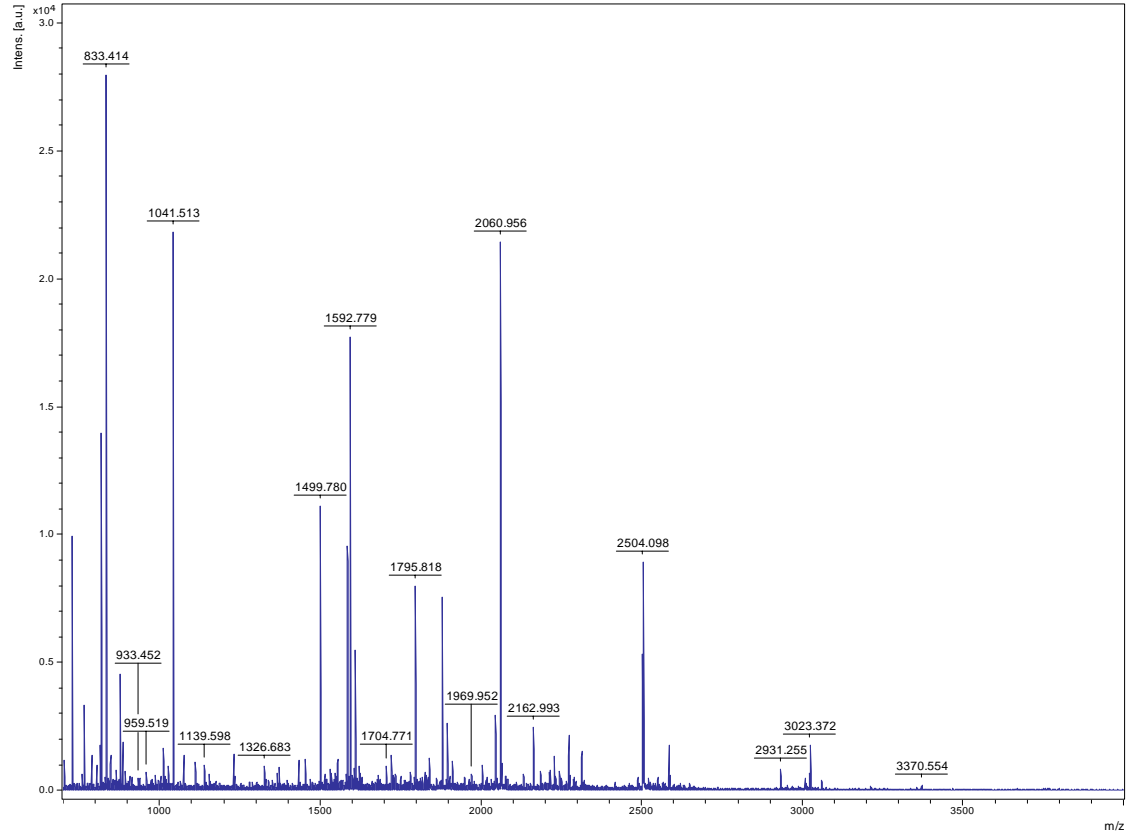

Match to: gi|77554103 Score: 231 Expect: 1.1e-18

| Start - End | Observed  | Mr (expt) | Mr (calc) | Delta   | Miss Sequence                                         |
|-------------|-----------|-----------|-----------|---------|-------------------------------------------------------|
| 86 - 104    | 2045.0961 | 2044.0888 | 2044.1356 | -0.0468 | 0 K.VVLAAYSGGLDTSVIVPWL.R.E                           |
| 105 - 130   | 2931.2551 | 2930.2479 | 2930.2949 | -0.0470 | 0 R.ENYGCEVVCFTADVGGDIEGLEK.K 2 Carbamidomethyl (C)   |
| 105 - 131   | 3059.3782 | 3058.3709 | 3058.3898 | -0.0189 | 1 R.ENYGCEVVCFTADVGGDIEGLEK.K.A 2 Carbamidomethyl (C) |
| 134 - 143   | 959.5191  | 958.5118  | 958.5447  | -0.0329 | 0 K.ASGASQLVVK.D                                      |
| 144 - 159   | 2003.9525 | 2002.9452 | 2002.9709 | -0.0257 | 1 K.DLKEEFVSEIYIPL.R.A                                |
| 144 - 159   | 2060.9561 | 2059.9488 | 2059.9924 | -0.0436 | 1 K.DLKEEFVSEIYIPL.R.A Carbamidomethyl (C)            |
| 147 - 159   | 1704.7709 | 1703.7636 | 1703.7865 | -0.0229 | 0 K.EEFVSEIYIPL.R.A Carbamidomethyl (C)               |
| 189 - 202   | 1371.6025 | 1370.5953 | 1370.6248 | -0.0295 | 0 K.EVGADAVAHGCTG.K.G Carbamidomethyl (C)             |
| 222 - 234   | 1584.7806 | 1583.7734 | 1583.8208 | -0.0475 | 1 K.VVAPWREWDITGR.E                                   |
| 228 - 234   | 876.4035  | 875.3962  | 875.4137  | -0.0175 | 0 R.EWDITGR.E                                         |
| 228 - 242   | 1795.8179 | 1794.8106 | 1794.8424 | -0.0318 | 1 R.EWDITGREDAIEYAK.K                                 |
| 235 - 242   | 938.4367  | 937.4294  | 937.4392  | -0.0098 | 0 R.EDAIEYAK.K                                        |
| 244 - 252   | 1004.5121 | 1003.5049 | 1003.5814 | -0.0766 | 0 K.HNVPIPVTK.K                                       |
| 259 - 280   | 2585.2092 | 2584.2020 | 2584.2306 | -0.0286 | 1 R.DRNLWHLSEGDILEDPANEPK.E                           |
| 261 - 280   | 2314.0518 | 2313.0445 | 2313.1025 | -0.0580 | 0 R.NLWHLSEGDILEDPANEPK.E                             |
| 316 - 325   | 1014.5588 | 1013.5516 | 1013.5757 | -0.0241 | 0 K.DLSPASLLAK.L                                      |
| 338 - 344   | 892.4171  | 891.4098  | 891.4120  | -0.0022 | 0 R.IDMVENR.L Oxidation (M)                           |
| 352 - 367   | 1592.7792 | 1591.7719 | 1591.8028 | -0.0309 | 0 R.GVYETPGGTMAAAVR.E                                 |
| 352 - 367   | 1608.7700 | 1607.7627 | 1607.7977 | -0.0349 | 0 R.GVYETPGGTMAAAVR.E Oxidation (M)                   |
| 368 - 376   | 1075.5216 | 1074.5143 | 1074.5557 | -0.0413 | 0 R.ELESLTLD.R.E                                      |
| 368 - 382   | 1878.8875 | 1877.8802 | 1877.9193 | -0.0391 | 1 R.ELESLTLDRETMQWK.D                                 |
| 368 - 382   | 1894.8695 | 1893.8622 | 1893.9142 | -0.0520 | 1 R.ELESLTLDRETMQWK.D Oxidation (M)                   |
| 389 - 397   | 1041.5128 | 1040.5055 | 1040.5290 | -0.0235 | 0 K.YAELVYAGR.W                                       |
| 398 - 403   | 833.4144  | 832.4072  | 832.4232  | -0.0160 | 0 R.WFDPLR.Q                                          |
| 404 - 424   | 2228.0479 | 2227.0406 | 2227.1042 | -0.0636 | 0 R.QSIDAFMENITATTGVS.TLK.L                           |
| 404 - 424   | 2244.0371 | 2243.0298 | 2243.0991 | -0.0693 | 0 R.QSIDAFMENITATTGVS.TLK.L Oxidation (M)             |
| 437 - 443   | 885.4340  | 884.4267  | 884.4392  | -0.0125 | 0 K.SPYSLYR.E                                         |
| 437 - 465   | 3370.5542 | 3369.5469 | 3369.5425 | -0.0045 | 1 K.SPYSLYREDISSFENGEIYNQADAEGFIR.L                   |
| 444 - 465   | 2504.0981 | 2503.0909 | 2503.1138 | -0.0230 | 0 R.EDISSFENGEIYNQADAEGFIR.L                          |
| 466 - 472   | 819.4535  | 818.4462  | 818.4650  | -0.0188 | 0 R.LYGLPLR.V                                         |

### Spot 1811

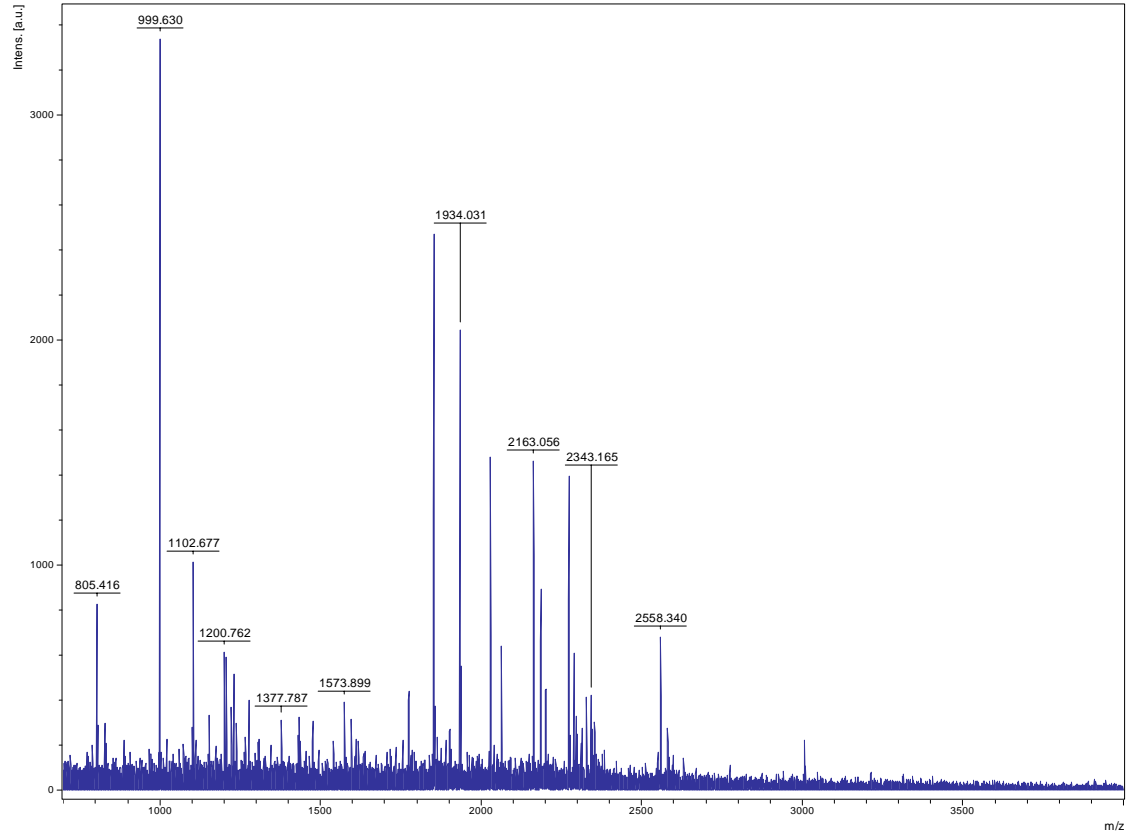

Match to: gi|50931897 Score: 78

#### Matched peptides:

| Start - End | Observed  | Mr (expt) | Mr (calc) | Delta   | Miss Sequence             |
|-------------|-----------|-----------|-----------|---------|---------------------------|
| 131 - 144   | 1431.7039 | 1430.6966 | 1430.7365 | -0.0399 | 1 K.SVGLTAADLEGKR.V       |
| 149 - 166   | 2028.9032 | 2027.8959 | 2027.9396 | -0.0437 | 0 R.ADLNVPLDDNQNTDDTR.V   |
| 169 - 179   | 1230.7242 | 1229.7170 | 1229.7383 | -0.0214 | 0 R.AAIPTIQYLIK.N         |
| 236 - 254   | 2062.0137 | 2061.0064 | 2061.0643 | -0.0579 | 1 K.KLASLADLYVNDAFGTAHR.A |
| 237 - 254   | 1933.9398 | 1932.9325 | 1932.9693 | -0.0368 | 0 K.LASLADLYVNDAFGTAHR.A  |
| 278 - 290   | 1377.7064 | 1376.6991 | 1376.7187 | -0.0195 | 0 K.ELDYLVGAVSSPK.R       |
| 291 - 301   | 1102.6284 | 1101.6211 | 1101.6294 | -0.0083 | 0 K.RPFAAIVGGSK.V         |

## Spot 1812

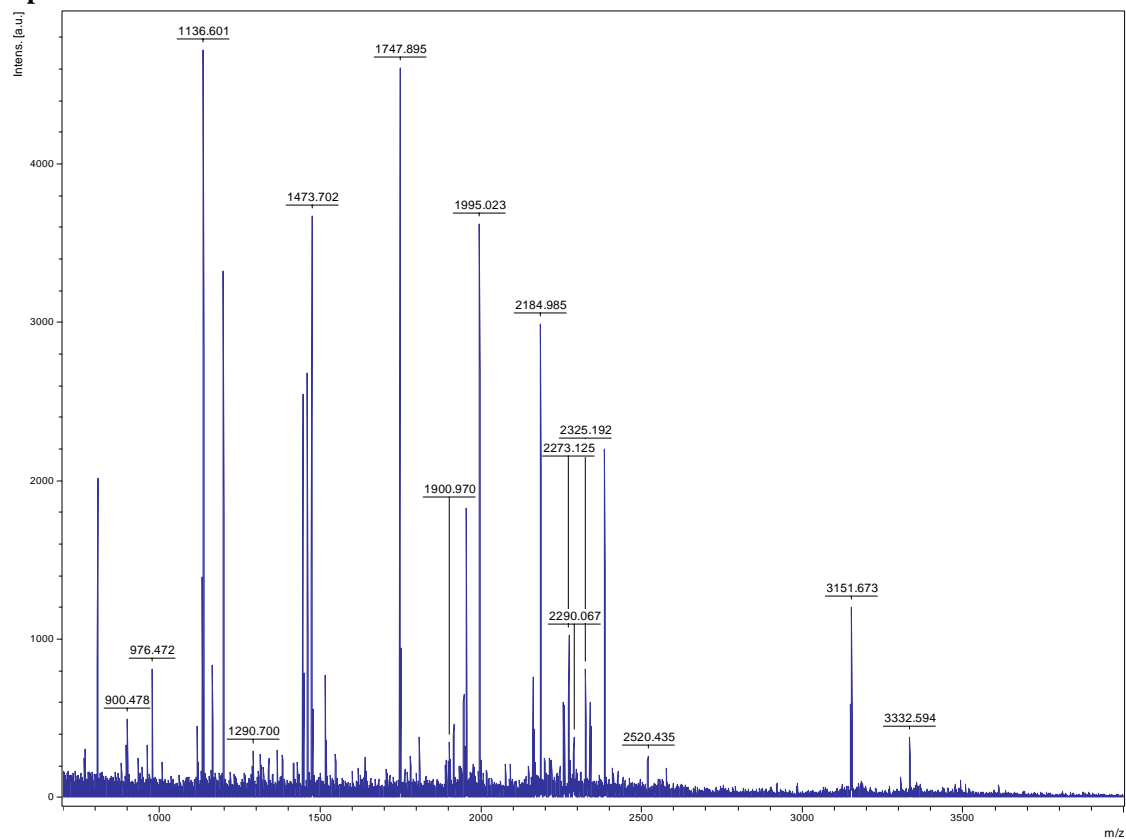

Match to: gi|50948447; Score: 134

### Matched peptides:

| Start - End | Observed | Mr (expt) | Mr (calc) | Delta | Miss Sequence                      |
|-------------|----------|-----------|-----------|-------|------------------------------------|
| 41 - 53     | 1446.76  | 1445.76   | 1445.75   | 0.01  | 0 ESVAPYERPAISK                    |
| 54 - 63     | 1136.60  | 1135.60   | 1135.58   | 0.02  | 0 GYLFPQNAAR                       |
| 64 - 77     | 1473.70  | 1472.70   | 1472.68   | 0.02  | 0 LPGFHTCVGSGGER                   |
| 78 - 86     | 1164.59  | 1163.59   | 1163.59   | 0.00  | 0 LLPEWYSEK                        |
| 130 - 147   | 1995.02  | 1994.02   | 1994.01   | 0.01  | 0 LTDFGVQGAEANDILYLR               |
| 185 - 202   | 2256.99  | 2255.99   | 2255.98   | 0.01  | 0 TNNFDVTMVYPEPWCMPR               |
| 185 - 202   | 2273.12  | 2272.12   | 2271.98   | 0.15  | 0 TNNFDVTMVYPEPWCMPR Oxidation (M) |
| 203 - 219   | 1914.92  | 1913.91   | 1913.92   | -0.01 | 0 LFTSGLAAFYEGYANK                 |
| 312 - 320   | 1118.61  | 1117.60   | 1117.57   | 0.03  | 1 RVEHVDHAR                        |
| 334 - 351   | 2184.98  | 2183.98   | 2183.97   | 0.01  | 0 EAGESVPEYDYLPHYFSR               |
| 352 - 381   | 3332.59  | 3331.59   | 3331.53   | 0.06  | 0 SFDLSWQFYGDNVGEDVLFQDNDPTAAKPK   |
| 382 - 388   | 900.48   | 899.48    | 899.45    | 0.02  | 0 FGSYWIK                          |
| 392 - 410   | 1946.01  | 1945.01   | 1945.02   | -0.01 | 0 VVGVFLEGGSAEENQVIK               |

Match to: gi|76800642; Score: 109

### Matched peptides:

| Start - End | Observed | Mr (expt) | Mr (calc) | Delta | Miss Sequence                          |
|-------------|----------|-----------|-----------|-------|----------------------------------------|
| 21 - 30     | 976.47   | 975.47    | 975.44    | 0.03  | 0 AGFAGDDAPR                           |
| 31 - 41     | 1198.73  | 1197.72   | 1197.70   | 0.02  | 0 AVFPSIVGRPR                          |
| 87 - 97     | 1515.75  | 1514.75   | 1514.74   | 0.01  | 0 IWHTFYNELR                           |
| 98 - 115    | 1954.07  | 1953.06   | 1953.06   | 0.01  | 0 VAPEEHPVLLTEAPLNPK                   |
| 150 - 179   | 3151.67  | 3150.67   | 3150.63   | 0.04  | 0 TTGIVLDSGDGVSHTVPIYEGYALPHAILR       |
| 199 - 208   | 1132.54  | 1131.53   | 1131.52   | 0.01  | 0 GYSFTTTAER                           |
| 216 - 233   | 2163.05  | 2162.05   | 2162.01   | 0.04  | 1 EKLSYIALDYDQEMETAK Oxidation (M)     |
| 241 - 256   | 1747.90  | 1746.89   | 1746.88   | 0.01  | 0 SYELPDGQVITIGAER                     |
| 293 - 314   | 2325.19  | 2324.19   | 2324.18   | 0.01  | 1 KDLYGNIVLSGGTTMFPGIADR               |
| 293 - 314   | 2341.19  | 2340.19   | 2340.18   | 0.01  | 1 KDLYGNIVLSGGTTMFPGIADR Oxidation (M) |
| 331 - 338   | 895.56   | 894.55    | 894.53    | 0.02  | 1 VVAPPERK                             |
| 362 - 374   | 1459.68  | 1458.68   | 1458.67   | 0.00  | 0 AEYDESGPSIVHR                        |

### Spot 1816

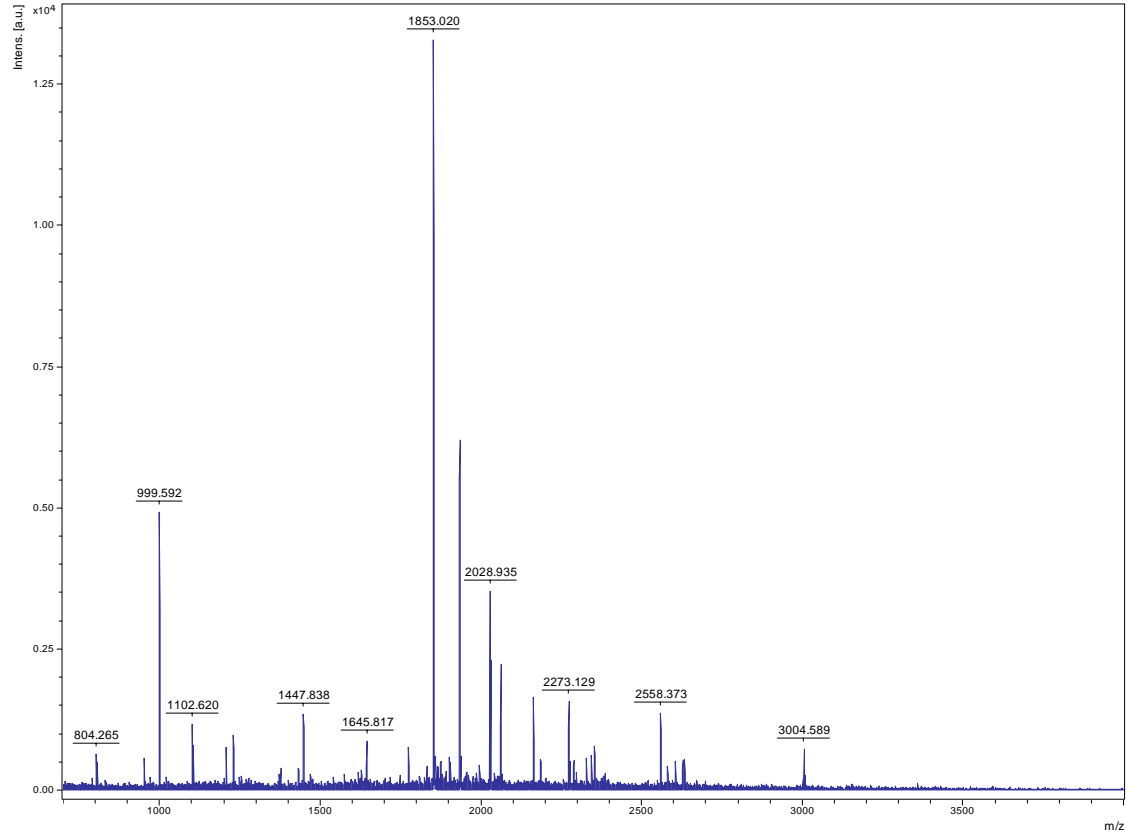

Match to: gi|50931897; Score: 108

#### Matched peptides:

| Start - End | Observed | Mr (expt) | Mr (calc) | Delta | Miss Sequence                 |
|-------------|----------|-----------|-----------|-------|-------------------------------|
| 131 - 144   | 1431.73  | 1430.72   | 1430.74   | -0.01 | 1 SVGDLTAADLEGKR              |
| 149 - 166   | 2028.94  | 2027.93   | 2027.94   | -0.01 | 0 ADLNVPLDDNQNTTDDTR          |
| 169 - 179   | 1230.73  | 1229.72   | 1229.74   | -0.01 | 0 AAIPTIQYLIK                 |
| 194 - 221   | 3004.59  | 3003.59   | 3003.61   | -0.03 | 1 AEDVIGPDVEKLVSELPNGSVLLENVR |
| 236 - 254   | 2062.06  | 2061.06   | 2061.06   | -0.00 | 1 KLASLADLYVNDAFGTAHR         |
| 237 - 254   | 1933.97  | 1932.96   | 1932.97   | -0.01 | 0 LASLADLYVNDAFGTAHR          |
| 265 - 277   | 1447.84  | 1446.84   | 1446.86   | -0.02 | 0 FLKPSVAGFLLQK               |
| 278 - 290   | 1377.69  | 1376.69   | 1376.72   | -0.03 | 0 ELDYLVGAVSSPK               |
| 291 - 301   | 1102.62  | 1101.62   | 1101.63   | -0.01 | 0 RPFAAIVGGSK                 |

## Spot 1825

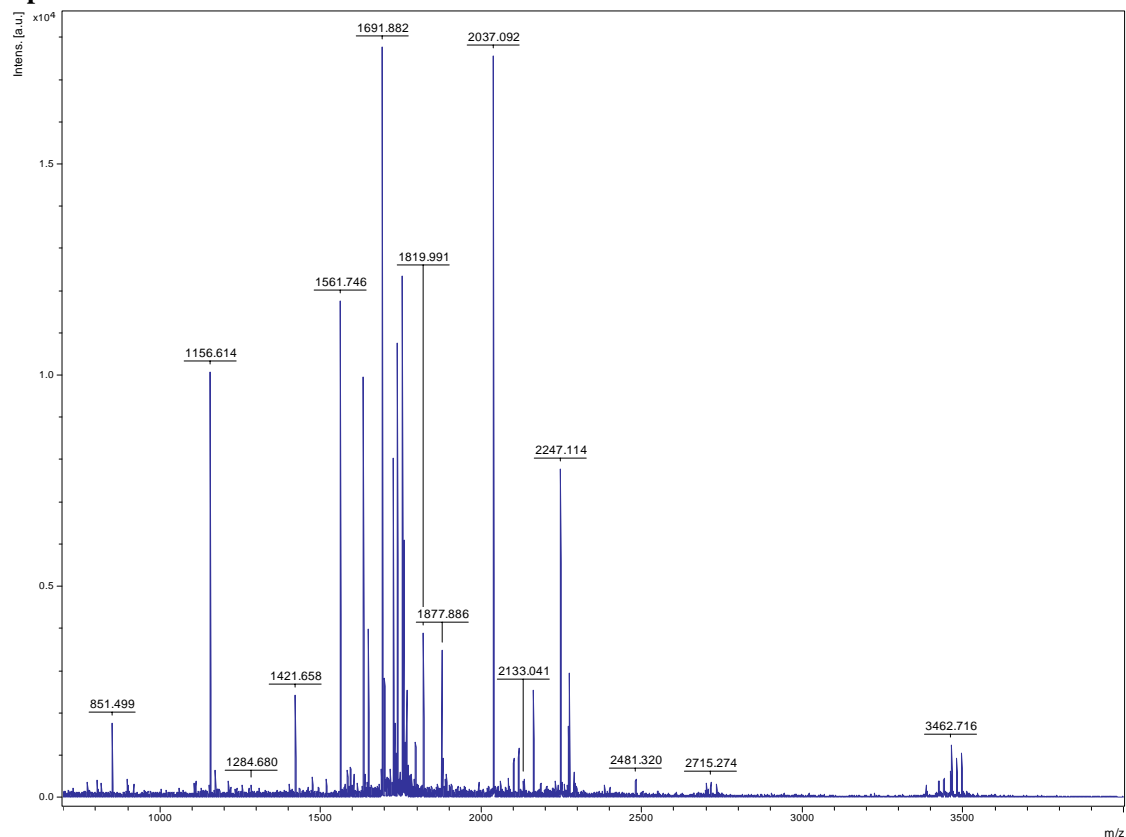

Match to: gj|21685576; Score: 358

### Matched peptides:

| Start - End | Observed | Mr (expt) | Mr (calc) | Delta | Miss Sequence                                       |
|-------------|----------|-----------|-----------|-------|-----------------------------------------------------|
| 64 - 80     | 1795.94  | 1794.94   | 1794.95   | -0.01 | 0 TKPHVNVGTIGHVDHGK                                 |
| 81 - 89     | 919.54   | 918.53    | 918.54    | -0.01 | 0 TTLTAAITK                                         |
| 99 - 112    | 1561.75  | 1560.74   | 1560.77   | -0.02 | 1 AVAFDEIDK APEEK                                   |
| 115 - 129   | 1603.79  | 1602.78   | 1602.83   | -0.04 | 0 GITIATAHVEYETAK                                   |
| 115 - 130   | 1759.92  | 1758.92   | 1758.93   | -0.00 | 1 GITIATAHVEYETAKR                                  |
| 131 - 145   | 1768.79  | 1767.79   | 1767.78   | -0.01 | 0 HYAHVDCPGHADYVK                                   |
| 146 - 172   | 2715.27  | 2714.27   | 2714.31   | -0.04 | 0 NMITGAAQMDGGILVVSAPDGMPQTK Oxidation (M)          |
| 146 - 172   | 2731.25  | 2730.25   | 2730.30   | -0.05 | 0 NMITGAAQMDGGILVVSAPDGMPQTK 2 Oxidation (M)        |
| 173 - 179   | 851.50   | 850.50    | 850.50    | -0.01 | 0 EHILLAR                                           |
| 211 - 217   | 899.48   | 898.48    | 898.48    | 0.00  | 0 ELLSFYK                                           |
| 211 - 227   | 2037.09  | 2036.09   | 2036.10   | -0.01 | 1 ELLSFYKFPGDEPIIR                                  |
| 218 - 227   | 1156.61  | 1155.61   | 1155.63   | -0.02 | 0 FPGDEPIIR                                         |
| 228 - 248   | 2100.08  | 2099.07   | 2099.12   | -0.05 | 1 GSALSALQGTNDEIGKNAILK                             |
| 249 - 262   | 1632.76  | 1631.76   | 1631.79   | -0.02 | 0 LMDAVDEYIPDPVR                                    |
| 249 - 262   | 1648.76  | 1647.76   | 1647.78   | -0.02 | 0 LMDAVDEYIPDPVR Oxidation (M)                      |
| 249 - 266   | 2117.04  | 2116.03   | 2116.05   | -0.02 | 1 LMDAVDEYIPDPVRQLDK                                |
| 249 - 266   | 2133.04  | 2132.04   | 2132.05   | -0.01 | 1 LMDAVDEYIPDPVRQLDK Oxidation (M)                  |
| 267 - 281   | 1738.87  | 1737.86   | 1737.88   | -0.01 | 0 SFLMPIEDVFSIQGR                                   |
| 267 - 281   | 1754.87  | 1753.86   | 1753.87   | -0.01 | 0 SFLMPIEDVFSIQGR Oxidation (M)                     |
| 289 - 312   | 2481.32  | 2480.32   | 2480.34   | -0.02 | 1 VEQGTIKTGEDVEILGLTPSGPLK                          |
| 296 - 312   | 1725.88  | 1724.88   | 1724.92   | -0.04 | 0 TGEDVEILGLTPSGPLK                                 |
| 313 - 322   | 1112.55  | 1111.55   | 1111.56   | -0.01 | 0 TTVTGVEMFK                                        |
| 313 - 323   | 1256.64  | 1255.64   | 1255.65   | -0.01 | 1 TTVTGVEMFK Oxidation (M)                          |
| 323 - 339   | 1819.99  | 1818.99   | 1819.00   | -0.01 | 1 KILDHGEAGDNVGLLLR                                 |
| 324 - 339   | 1691.88  | 1690.88   | 1690.90   | -0.02 | 0 ILDHGEAGDNVGLLLR                                  |
| 344 - 359   | 1727.83  | 1726.83   | 1726.91   | -0.09 | 1 GDVQRGQV VCKPGTVK                                 |
| 349 - 359   | 1172.62  | 1171.62   | 1171.64   | -0.02 | 0 GQV VCKPGTVK                                      |
| 360 - 373   | 1732.89  | 1731.89   | 1731.91   | -0.02 | 1 TYQKFEAIIYVLTK                                    |
| 364 - 373   | 1212.63  | 1211.63   | 1211.64   | -0.02 | 0 FEAEIYVLTK                                        |
| 379 - 393   | 1877.89  | 1876.88   | 1876.89   | -0.01 | 0 HTAFLSNYSQFYFR                                    |
| 401 - 433   | 3462.72  | 3461.71   | 3461.76   | -0.04 | 0 VVLPDGVEMVMPGDNVTAGFELISPVPLEPGQR                 |
| 401 - 433   | 3478.73  | 3477.73   | 3477.75   | -0.03 | 0 VVLPDGVEMVMPGDNVTAGFELISPVPLEPGQR Oxidation (M)   |
| 401 - 433   | 3494.73  | 3493.72   | 3493.75   | -0.02 | 0 VVLPDGVEMVMPGDNVTAGFELISPVPLEPGQR 2 Oxidation (M) |
| 442 - 450   | 817.46   | 816.46    | 816.47    | -0.01 | 0 TVGAGVVSK                                         |

## Spot 1836

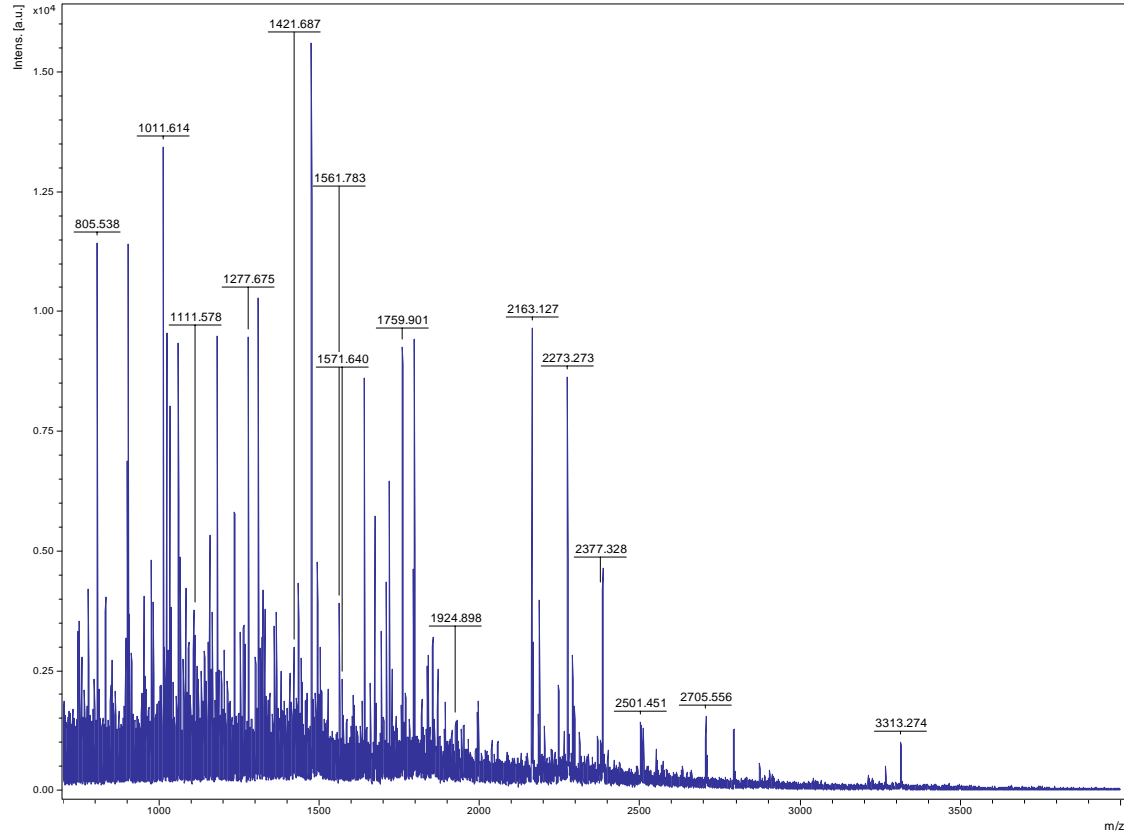

Match to: gj|14209591; Score: 69

### Matched peptides:

| Start - End | Observed | Mr (expt) | Mr (calc) | Delta | Miss Sequence                          |
|-------------|----------|-----------|-----------|-------|----------------------------------------|
| 87 - 101    | 1672.91  | 1671.91   | 1671.96   | -0.04 | 0 LEKPVVILISSDGFR                      |
| 108 - 115   | 902.58   | 901.58    | 901.49    | 0.09  | 0 AATPHIHR                             |
| 206 - 216   | 1443.56  | 1442.56   | 1442.57   | -0.01 | 1 GSWDCPKYCR                           |
| 281 - 288   | 900.60   | 899.60    | 899.51    | 0.09  | 0 LIAGLEER                             |
| 289 - 310   | 2377.33  | 2376.33   | 2376.11   | 0.22  | 0 GVFDVNVILVGDHGMVGTCDK Oxidation (M)  |
| 289 - 311   | 2505.32  | 2504.32   | 2504.20   | 0.12  | 1 GVFDVNVILVGDHGMVGTCDKK Oxidation (M) |
| 370 - 379   | 1251.61  | 1250.61   | 1250.63   | -0.03 | 1 MYLKEDLPSR                           |
| 380 - 387   | 1024.53  | 1023.53   | 1023.48   | 0.05  | 0 LHYADSYR                             |
| 388 - 404   | 1929.00  | 1928.00   | 1928.03   | -0.03 | 1 IPPHGLPEEGYK VEMK Oxidation (M)      |
| 426 - 434   | 1011.61  | 1010.61   | 1010.57   | 0.05  | 0 TIFIAHGPR                            |

## Spot 1841

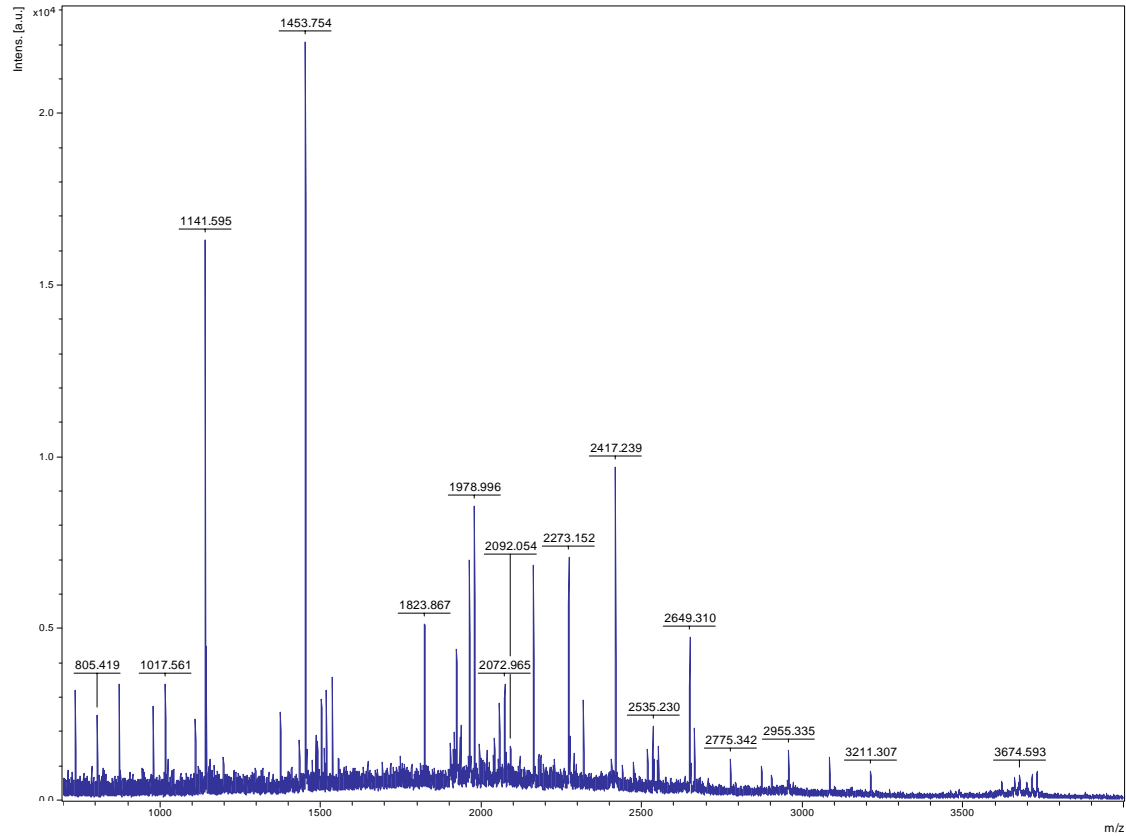

Match to: gj|34894718 Score: 127 Expect: 1.3e-08

### Matched peptides:

| Start - End | Observed  | Mr (expt) | Mr (calc) | Delta  | Miss Sequence                               |
|-------------|-----------|-----------|-----------|--------|---------------------------------------------|
| 77 - 91     | 1535.8561 | 1534.8488 | 1534.7263 | 0.1225 | 0 R.GIGFVSDDVGLDADR.C                       |
| 77 - 93     | 1824.0117 | 1823.0044 | 1822.8519 | 0.1525 | 1 R.GIGFVSDDVGLDADRCK.V Carbamidomethyl (C) |
| 94 - 115    | 2417.4661 | 2416.4588 | 2416.2498 | 0.2090 | 0 K.VLVNIEQQSPDIAQGVHGHFTK.R                |
| 160 - 171   | 1374.7307 | 1373.7234 | 1373.6510 | 0.0725 | 0 K.NGTCAWLRPDGK.T Carbamidomethyl (C)      |
| 172 - 189   | 1963.1409 | 1962.1336 | 1961.9880 | 0.1456 | 0 K.TQVTVEYLNDAAGAMVPVR.V                   |
| 172 - 189   | 1979.1595 | 1978.1523 | 1977.9829 | 0.1694 | 0 K.TQVTVEYLNDAAGAMVPVR.V Oxidation (M)     |
| 190 - 213   | 2649.5750 | 2648.5677 | 2648.3293 | 0.2384 | 0 R.VHTVLISQHDDETVTNDEIAADLK.E              |
| 214 - 229   | 1923.2107 | 1922.2034 | 1922.0513 | 0.1522 | 1 K.EHVIKPIPKYLDK.T                         |
| 230 - 239   | 1141.6710 | 1140.6637 | 1140.6040 | 0.0598 | 0 K.TIFHLNPSGR.F                            |
| 240 - 254   | 1453.8579 | 1452.8506 | 1452.7473 | 0.1033 | 0 R.FVIGGPHGDAGLTGR.K                       |
| 255 - 275   | 2092.2332 | 2091.2259 | 2091.0537 | 0.1722 | 1 R.KIIIDTYGGWGAHGGGAFSGK.D                 |
| 294 - 302   | 873.5706  | 872.5633  | 872.5079  | 0.0554 | 0 K.SIVASGLAR.R                             |
| 341 - 357   | 2041.1553 | 2040.1480 | 2039.9808 | 0.1672 | 0 K.ENDFRPGMNTINLDLK.R                      |
| 341 - 357   | 2057.1504 | 2056.1431 | 2055.9757 | 0.1674 | 0 K.ENDFRPGMNTINLDLK.R Oxidation (M)        |
| 341 - 357   | 2073.1416 | 2072.1343 | 2071.9706 | 0.1637 | 0 K.ENDFRPGMNTINLDLK.R 2 Oxidation (M)      |
| 366 - 374   | 979.5375  | 978.5303  | 978.4671  | 0.0631 | 0 K.TAAYGHFGR.E                             |
| 366 - 388   | 2663.5430 | 2662.5357 | 2662.3179 | 0.2178 | 1 K.TAAYGHFGRDPDFTWEVVKPLK.Y                |



## Spot 1842

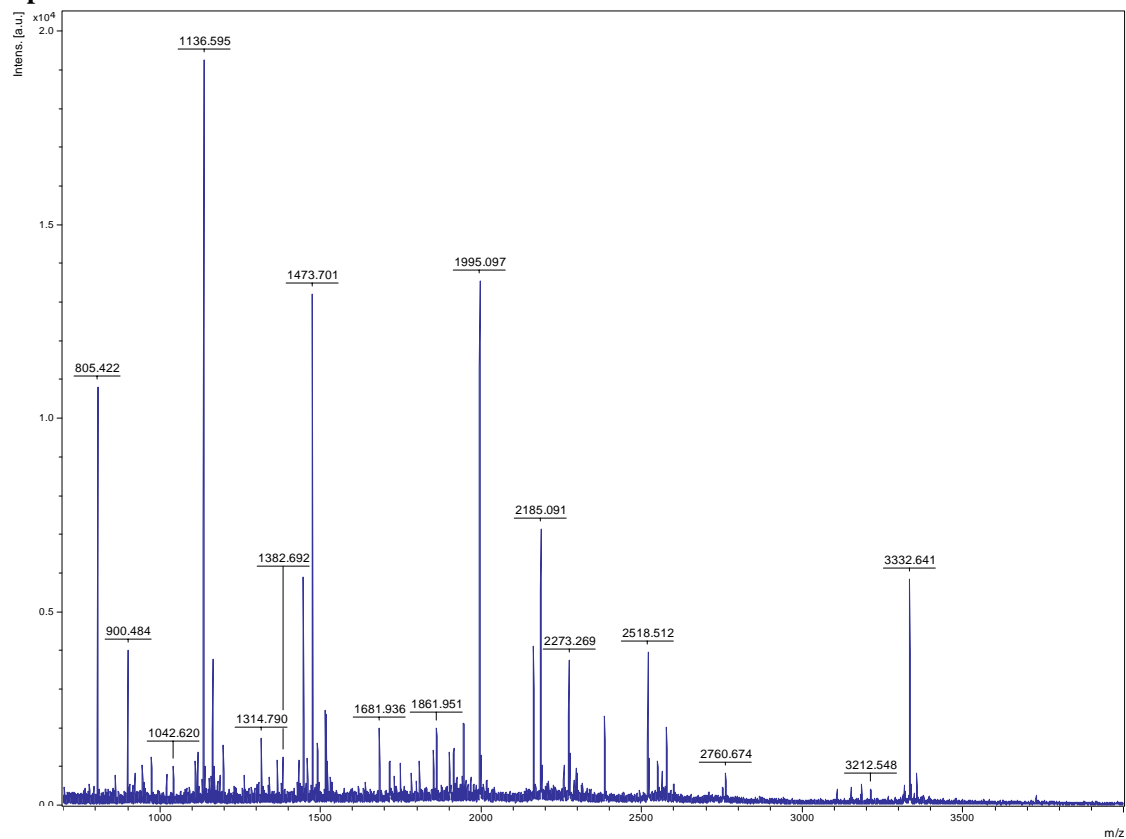

Match to: gi|50948447 Score: 121 Expect: 5.3e-08

### Matched peptides:

| Start - End | Observed  | Mr (expt) | Mr (calc) | Delta   | Miss Sequence                                                |
|-------------|-----------|-----------|-----------|---------|--------------------------------------------------------------|
| 1 - 23      | 2295.1113 | 2294.1040 | 2294.1993 | -0.0952 | 1 -...MAAAKHFTYVILGGGVAAGYAAR.E                              |
| 28 - 40     | 1339.7931 | 1338.7858 | 1338.7870 | -0.0012 | 0 K.QGVKPGELAIISK.E                                          |
| 41 - 53     | 1446.7503 | 1445.7430 | 1445.7514 | -0.0084 | 0 K.ESVAPYERPAISK.G                                          |
| 54 - 63     | 1136.5869 | 1135.5796 | 1135.5774 | 0.0022  | 0 K.GYLPQNAAR.L                                              |
| 54 - 77     | 2576.2124 | 2575.2051 | 2575.2389 | -0.0338 | 1 K.GYLPQNAARLPGFHTCVGSGGER.L Acetyl (N-term)                |
| 64 - 77     | 1473.6833 | 1472.6760 | 1472.6830 | -0.0070 | 0 R.LPGFHTCVGSGGER.L Carbamidomethyl (C)                     |
| 64 - 77     | 1515.7349 | 1514.7276 | 1514.6935 | 0.0341  | 0 R.LPGFHTCVGSGGER.L Acetyl (N-term); Carbamidomethyl (C)    |
| 78 - 86     | 1164.6051 | 1163.5978 | 1163.5862 | 0.0116  | 0 R.LLPEWYSEK.G                                              |
| 87 - 98     | 1314.7840 | 1313.7767 | 1313.7806 | -0.0038 | 0 K.GIELILSTEIVK.A                                           |
| 130 - 147   | 1994.9858 | 1993.9785 | 1994.0108 | -0.0323 | 0 K.LTDFGVQGAENDILYLR.D                                      |
| 167 - 184   | 1730.9621 | 1729.9548 | 1729.9977 | -0.0429 | 0 K.AVIVGGGYGLESAALK.T                                       |
| 185 - 202   | 2257.9686 | 2256.9613 | 2256.9642 | -0.0029 | 0 K.TNNFDVTMVYPEPWCMR.L Acetyl (N-term); Oxidation (M)       |
| 185 - 202   | 2288.9498 | 2287.9425 | 2287.9700 | -0.0275 | 0 K.TNNFDVTMVYPEPWCMR.L Carbamidomethyl (C); 2 Oxidation (M) |
| 203 - 219   | 1914.8656 | 1913.8583 | 1913.9199 | -0.0616 | 0 R.LFTSGLAAFYEGYYANK.G                                      |
| 226 - 244   | 1806.8631 | 1805.8558 | 1805.8795 | -0.0236 | 0 K.GTVAVGFDADANGDVTAVK.L                                    |
| 247 - 270   | 2518.3166 | 2517.3093 | 2517.4066 | -0.0973 | 0 K.NGNVLEADIVGVGGRPLTHLFK.G                                 |
| 282 - 305   | 2563.1549 | 2562.1476 | 2562.2351 | -0.0875 | 0 K.TDAFFETSVPGVYAIADVAAPMK.L Oxidation (M)                  |
| 312 - 320   | 1118.5769 | 1117.5696 | 1117.5741 | -0.0044 | 1 R.RVEHVDHARK.K                                             |
| 313 - 321   | 1132.5190 | 1131.5117 | 1131.5785 | -0.0667 | 1 R.VEHVDHARK.S Acetyl (N-term)                              |
| 334 - 351   | 2184.9623 | 2183.9550 | 2183.9687 | -0.0137 | 0 K.EAGESVPEYDYLPHYYSR.S                                     |
| 382 - 388   | 900.4347  | 899.4274  | 899.4541  | -0.0267 | 0 K.FGSYWKID                                                 |
| 392 - 410   | 1945.9866 | 1944.9793 | 1945.0155 | -0.0362 | 0 K.VVGVFLEGSAEENQVIK.V                                      |

## Spot 1844

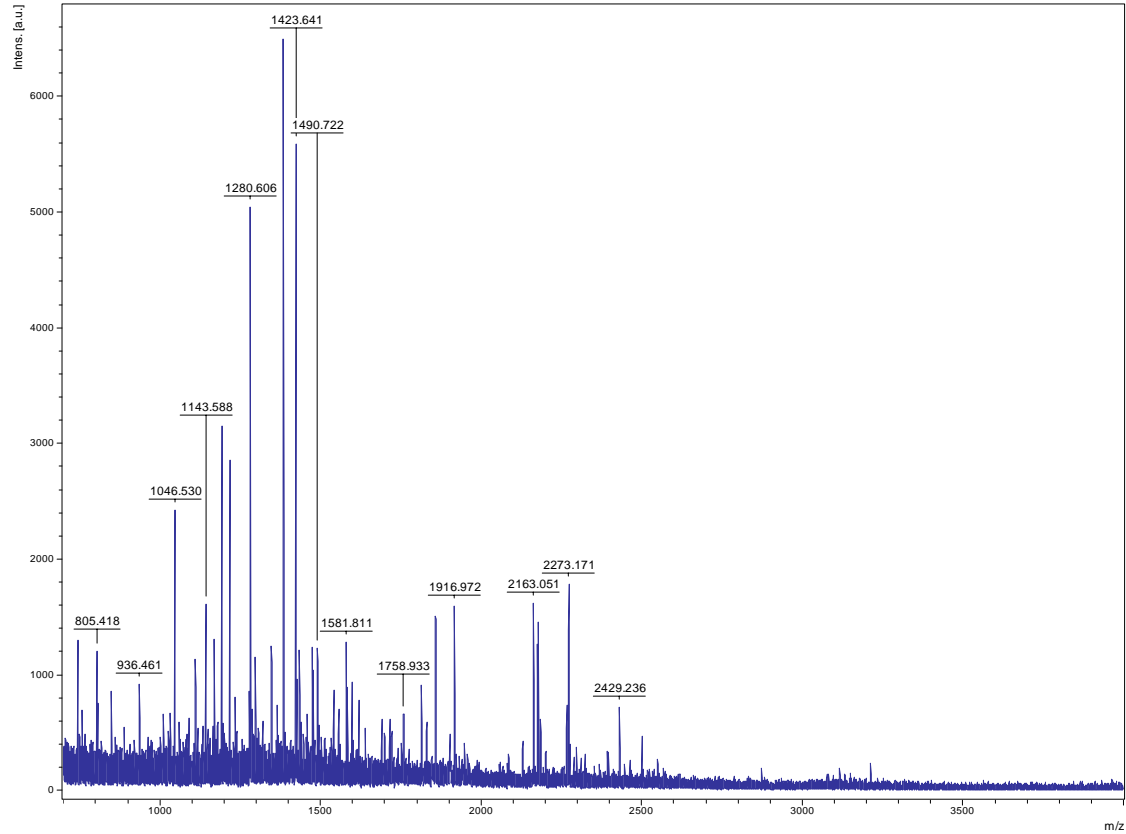

Match to: Q7XK23\_ORYSA Score: 89 Expect: 8.4e-05

### Matched peptides:

| Start - End | Observed  | Mr (expt) | Mr (calc) | Delta   | Miss Sequence                                  |
|-------------|-----------|-----------|-----------|---------|------------------------------------------------|
| 48 - 62     | 1581.8109 | 1580.8036 | 1580.8232 | -0.0195 | 0 R.GDMPTVPPAVIESIR.R                          |
| 48 - 62     | 1597.8011 | 1596.7939 | 1596.8181 | -0.0242 | 0 R.GDMPTVPPAVIESIR.R Oxidation (M)            |
| 66 - 88     | 2273.1707 | 2272.1634 | 2272.2030 | -0.0397 | 1 K.VCLKGGLATPVGGVSSLNMQLR.K Oxidation (M)     |
| 70 - 88     | 1813.9427 | 1812.9355 | 1812.9515 | -0.0160 | 0 K.GGLATPVGGVSSLNMQLR.K                       |
| 90 - 109    | 2266.1196 | 2265.1124 | 2265.1099 | 0.0024  | 0 K.ELDLYASLVNCSNFPGLPTR.H Carbamidomethyl (C) |
| 147 - 154   | 1010.5125 | 1009.5052 | 1009.5015 | 0.0038  | 1 K.FCERIAK.Y Carbamidomethyl (C)              |
| 155 - 165   | 1423.6406 | 1422.6333 | 1422.6568 | -0.0234 | 0 K.YAFEYAYLNRR.K                              |
| 179 - 189   | 1280.6060 | 1279.5987 | 1279.6230 | -0.0244 | 0 K.LADGLFLESCR.E Carbamidomethyl (C)          |
| 293 - 302   | 1217.5918 | 1216.5845 | 1216.5989 | -0.0144 | 0 R.HLQFPFADR.L                                |
| 293 - 308   | 1858.9755 | 1857.9682 | 1857.9737 | -0.0055 | 1 R.HLQFPFADRLETAVK.R                          |

## Spot 1850

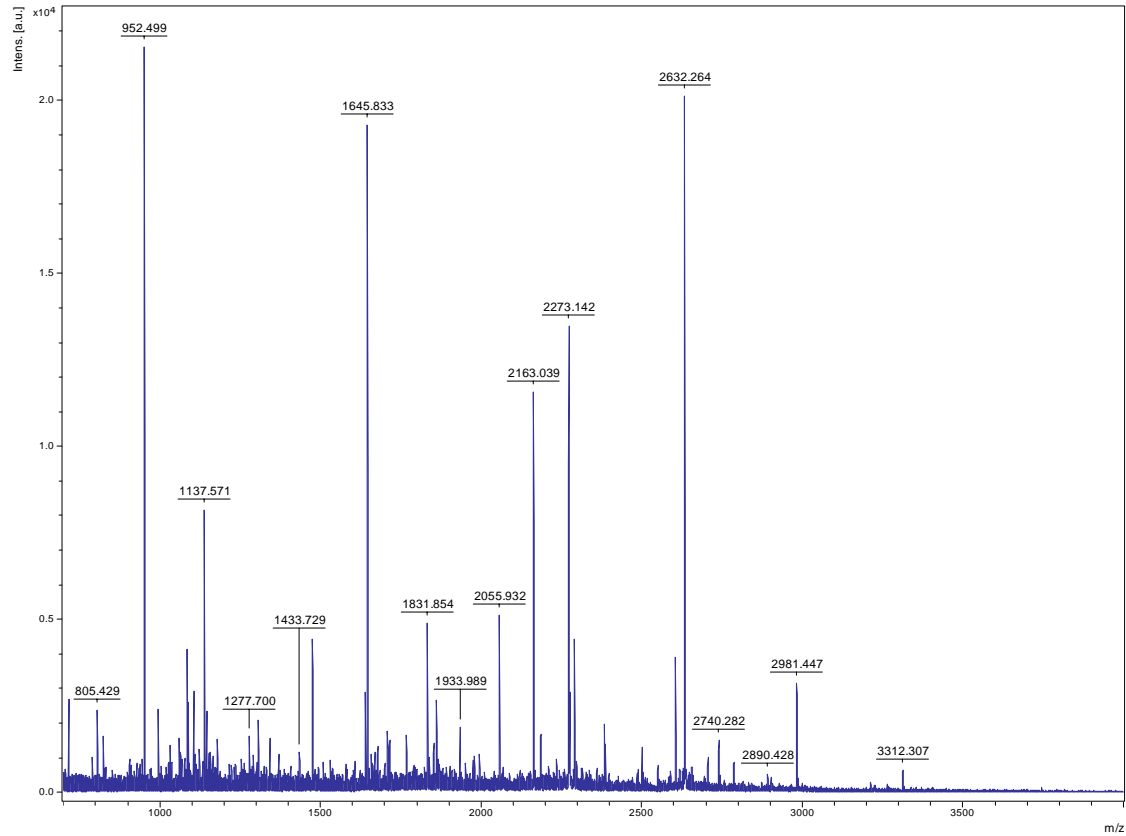

Match to: gj|13540812; Score: 164

### Matched peptides:

| Start - End | Observed | Mr (expt) | Mr (calc) | Delta | Miss Sequence              |
|-------------|----------|-----------|-----------|-------|----------------------------|
| 228 - 246   | 2055.93  | 2054.93   | 2054.93   | -0.00 | 0 HVDDNADITISCAPIDGSR      |
| 247 - 260   | 1529.72  | 1528.72   | 1528.72   | 0.01  | 1 ASDYGLVKFDDSGR           |
| 261 - 277   | 1933.99  | 1932.99   | 1932.99   | -0.00 | 0 VIQFLEKPEGADLESMK        |
| 307 - 314   | 928.57   | 927.57    | 927.56    | 0.00  | 0 DVLLDILK                 |
| 315 - 330   | 1860.97  | 1859.96   | 1859.95   | 0.01  | 1 SKYAHLQDFGSEILPR         |
| 317 - 330   | 1645.83  | 1644.83   | 1644.83   | 0.00  | 0 YAHLQDFGSEILPR           |
| 339 - 353   | 1831.85  | 1830.85   | 1830.85   | 0.00  | 0 ACVFTEYWEDIGTIK          |
| 354 - 368   | 1677.84  | 1676.84   | 1676.84   | -0.00 | 0 SFFDANLALTEQPPK          |
| 354 - 375   | 2604.25  | 2603.24   | 2603.26   | -0.02 | 1 SFFDANLALTEQPPKFEFYDPK   |
| 369 - 375   | 945.47   | 944.46    | 944.43    | 0.04  | 0 FEFYDPK                  |
| 376 - 383   | 952.50   | 951.50    | 951.48    | 0.01  | 0 TPFFTSR                  |
| 384 - 392   | 1086.64  | 1085.64   | 1085.62   | 0.01  | 1 YLPPARLEK                |
| 395 - 421   | 2981.45  | 2980.44   | 2980.43   | 0.02  | 1 IKDAISDGCSECTIEHSVIGISSR |
| 397 - 421   | 2740.28  | 2739.28   | 2739.25   | 0.03  | 0 DAISDGCSECTIEHSVIGISSR   |
| 448 - 463   | 1714.95  | 1713.95   | 1713.97   | -0.02 | 1 LLFEGKVPVIGENTK          |
| 454 - 463   | 1027.57  | 1026.57   | 1026.57   | -0.00 | 0 VPIGIGENTK               |
| 466 - 474   | 1106.52  | 1105.52   | 1105.50   | 0.02  | 0 NCHDMNAR                 |
| 466 - 474   | 1122.52  | 1121.52   | 1121.50   | 0.03  | 0 NCHDMNAR Oxidation (M)   |
| 478 - 500   | 2632.26  | 2631.26   | 2631.26   | 0.00  | 0 NVIIANTQGVQESDHPEEGYYIR  |

## Spot 1853

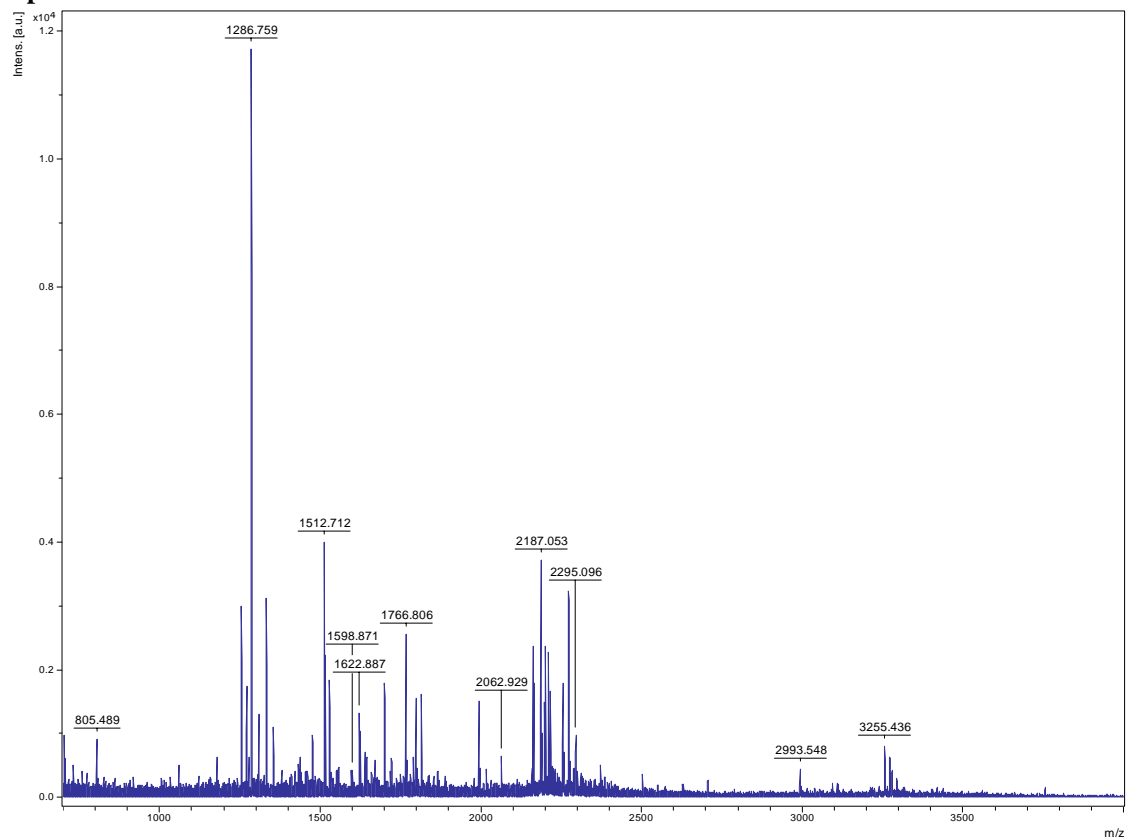

Match to: gi|51965038; Score: 150

### Matched peptides:

| Start - End | Observed | Mr (expt) | Mr (calc) | Delta | Miss Sequence                                  |
|-------------|----------|-----------|-----------|-------|------------------------------------------------|
| 51 - 65     | 1699.86  | 1698.85   | 1698.85   | 0.01  | 1 AYTVEKSEEIFNAAK                              |
| 66 - 77     | 1255.68  | 1254.68   | 1254.64   | 0.04  | 0 ELMPGGVNSPVR                                 |
| 66 - 77     | 1271.66  | 1270.66   | 1270.63   | 0.02  | 0 ELMPGGVNSPVR Oxidation (M)                   |
| 81 - 93     | 1332.74  | 1331.74   | 1331.71   | 0.03  | 0 SVGGQPIVFDSVK                                |
| 164 - 177   | 1512.71  | 1511.71   | 1511.69   | 0.02  | 0 FVNSGTEACMGALR                               |
| 164 - 177   | 1528.70  | 1527.70   | 1527.68   | 0.02  | 0 FVNSGTEACMGALR Oxidation (M)                 |
| 191 - 205   | 1766.81  | 1765.80   | 1765.79   | 0.02  | 0 FEGCYHGHADSFLVK                              |
| 206 - 223   | 1622.89  | 1621.89   | 1621.87   | 0.02  | 0 AGSGVATLGLPDSGPVVK                           |
| 278 - 297   | 2255.10  | 2254.10   | 2254.13   | -0.03 | 1 DLTKQDGALLVFDEVMTGFR                         |
| 278 - 297   | 2271.10  | 2270.10   | 2270.13   | -0.03 | 1 DLTKQDGALLVFDEVMTGFR Oxidation (M)           |
| 282 - 297   | 1797.88  | 1796.88   | 1796.88   | 0.00  | 0 QDGALLVFDEVMTGFR                             |
| 282 - 297   | 1813.89  | 1812.88   | 1812.87   | 0.01  | 0 QDGALLVFDEVMTGFR Oxidation (M)               |
| 298 - 318   | 2187.05  | 2186.05   | 2186.09   | -0.04 | 0 LAYGGAQEYFGITPDVSTLKG                        |
| 319 - 332   | 1286.76  | 1285.76   | 1285.71   | 0.04  | 0 IGGGLPVGAYGGR                                |
| 368 - 386   | 2199.06  | 2198.06   | 2198.09   | -0.03 | 1 LMEPGTYDYLDKITGDLVR                          |
| 368 - 386   | 2215.05  | 2214.04   | 2214.09   | -0.04 | 1 LMEPGTYDYLDKITGDLVR Oxidation (M)            |
| 395 - 405   | 1254.63  | 1253.63   | 1253.54   | 0.09  | 0 TGHEMCGGHIR                                  |
| 395 - 405   | 1270.56  | 1269.56   | 1269.53   | 0.02  | 0 TGHEMCGGHIR Oxidation (M)                    |
| 406 - 424   | 2062.93  | 2061.93   | 2061.94   | -0.01 | 0 GMFGFFFTAGPVHNFDAK Oxidation (M)             |
| 437 - 466   | 3255.44  | 3254.43   | 3254.54   | -0.11 | 0 GMLEEGVYLAPSQFEAGFTSLAHTSQDIEK               |
| 437 - 466   | 3271.43  | 3270.43   | 3270.54   | -0.11 | 0 GMLEEGVYLAPSQFEAGFTSLAHTSQDIEK Oxidation (M) |

## Spot 1863

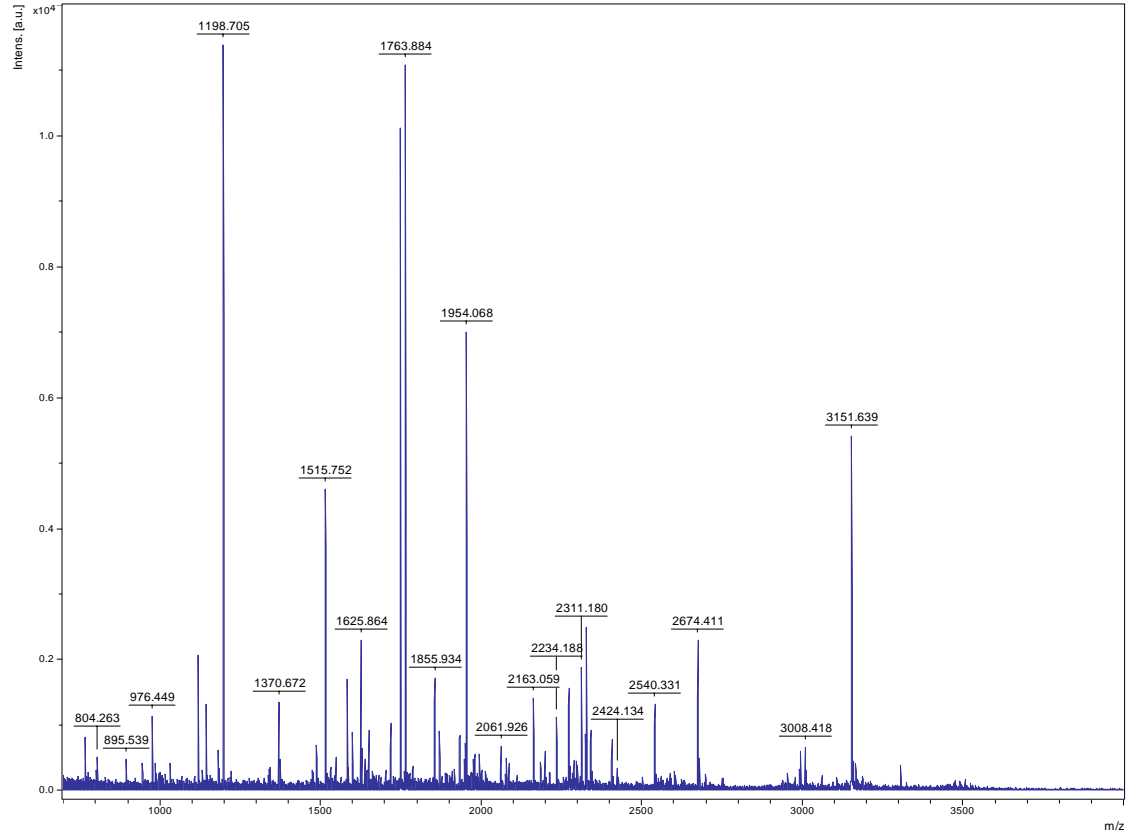

Match to: gi|15289940; Score: 140

### Matched peptides:

| Start - End | Observed | Mr (expt) | Mr (calc) | Delta | Miss Sequence                                 |
|-------------|----------|-----------|-----------|-------|-----------------------------------------------|
| 2 - 30      | 2992.43  | 2991.43   | 2991.33   | 0.09  | 1 ADGEDIQPLVCDNGTGMVKAGFAGDDAPR Oxidation (M) |
| 21 - 30     | 976.45   | 975.45    | 975.44    | 0.01  | 0 AGFAGDDAPR                                  |
| 31 - 41     | 1198.70  | 1197.70   | 1197.70   | 0.00  | 0 AVFPSIVGRPR                                 |
| 71 - 86     | 1932.89  | 1931.89   | 1931.87   | 0.02  | 0 YPIEHGIVSNWDDMEK                            |
| 71 - 86     | 1948.88  | 1947.88   | 1947.87   | 0.01  | 0 YPIEHGIVSNWDDMEK Oxidation (M)              |
| 87 - 97     | 1515.75  | 1514.75   | 1514.74   | 0.01  | 0 IWHTTFYNELR                                 |
| 98 - 115    | 1954.07  | 1953.07   | 1953.06   | 0.01  | 0 VAPEEHPVLLTEAPLNPK                          |
| 150 - 179   | 3151.64  | 3150.64   | 3150.63   | 0.00  | 0 TTGIVLDSGDGVSHTVPIYEGYALPHAILR              |
| 180 - 193   | 1547.75  | 1546.75   | 1546.80   | -0.05 | 1 LDLAGRDLDTSLMK                              |
| 199 - 208   | 1118.52  | 1117.51   | 1117.50   | 0.01  | 0 GYSFTTSAER                                  |
| 218 - 233   | 1855.93  | 1854.93   | 1854.93   | 0.01  | 0 LAYVALDYEQELETAK                            |
| 241 - 256   | 1763.88  | 1762.88   | 1762.87   | 0.01  | 0 SYELPDGQVITIGSER                            |
| 293 - 314   | 2311.18  | 2310.18   | 2310.17   | 0.01  | 1 KDLYGNVLSGGTTMFPGIADR                       |
| 293 - 314   | 2327.18  | 2326.18   | 2326.16   | 0.01  | 1 KDLYGNVLSGGTTMFPGIADR Oxidation (M)         |
| 294 - 314   | 2183.07  | 2182.07   | 2182.07   | -0.00 | 0 DLYGNVLSGGTTMFPGIADR                        |
| 294 - 314   | 2199.08  | 2198.08   | 2198.07   | 0.01  | 0 DLYGNVLSGGTTMFPGIADR Oxidation (M)          |
| 331 - 338   | 895.54   | 894.54    | 894.53    | 0.01  | 1 VVAPPERK                                    |
| 362 - 374   | 1487.67  | 1486.66   | 1486.67   | -0.00 | 0 DEYDESGPAIVHR                               |

## Spot 1873

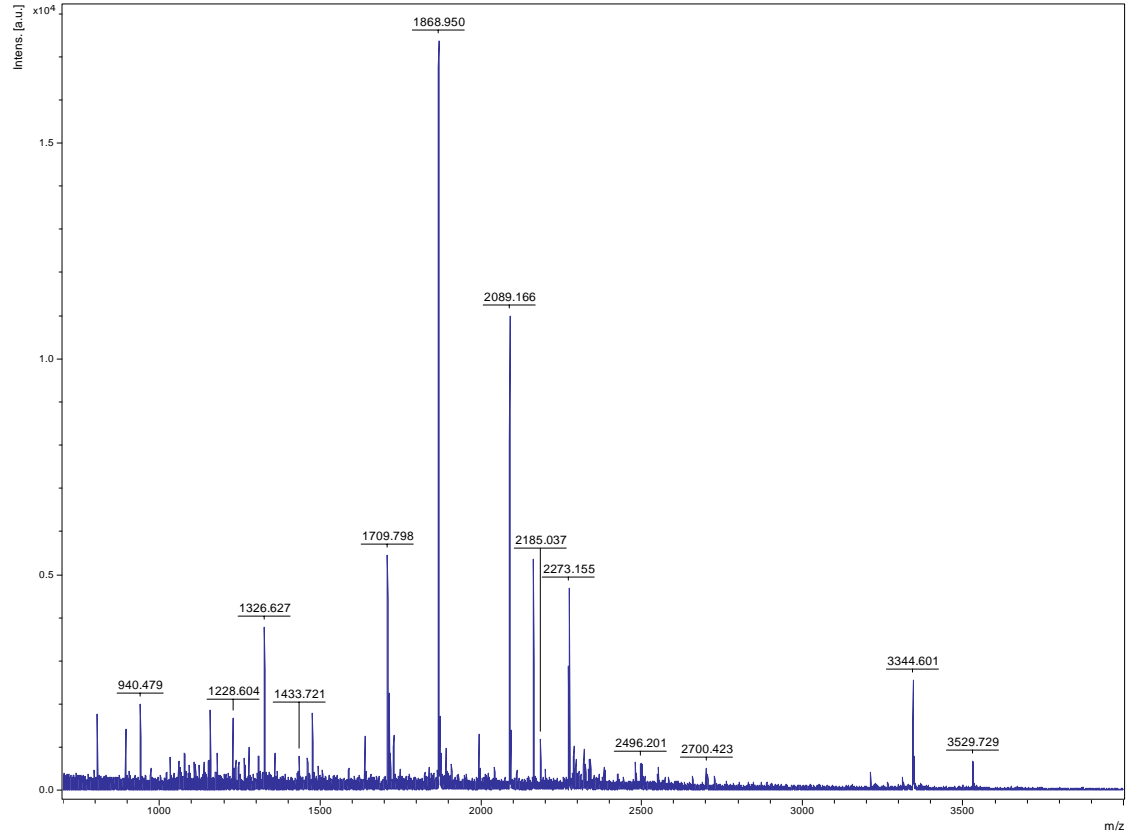

Match to: gi|77552725; Score: 238

### Matched peptides:

| Start - End | Observed | Mr (expt) | Mr (calc) | Delta | Miss Sequence                             |
|-------------|----------|-----------|-----------|-------|-------------------------------------------|
| 50 - 61     | 1433.72  | 1432.72   | 1432.64   | 0.08  | 1 ELDEGKQTDQDR                            |
| 56 - 63     | 1076.53  | 1075.53   | 1075.50   | 0.02  | 1 QTDQDRWK                                |
| 64 - 78     | 1709.80  | 1708.80   | 1708.79   | 0.01  | 0 GLAYDISDDQDITR                          |
| 79 - 111    | 3529.73  | 3528.73   | 3528.72   | 0.01  | 1 GKGFVDSLFLQAPTGDGTHEAVLSSYEYLSQGLR      |
| 81 - 111    | 3344.60  | 3343.60   | 3343.60   | -0.00 | 0 GFVDSLFLQAPTGDGTHEAVLSSYEYLSQGLR        |
| 139 - 147   | 1093.56  | 1092.56   | 1092.56   | -0.01 | 0 NFMTLPNIK Oxidation (M)                 |
| 148 - 158   | 1152.69  | 1151.68   | 1151.71   | -0.02 | 0 VPLILGIWGGK                             |
| 163 - 172   | 1228.60  | 1227.60   | 1227.60   | 0.01  | 0 SFQCELVFAK                              |
| 173 - 195   | 2320.05  | 2319.05   | 2319.05   | -0.01 | 0 MGINPIMMSAGELESGNAGEPAK Oxidation (M)   |
| 173 - 195   | 2336.06  | 2335.06   | 2335.05   | 0.01  | 0 MGINPIMMSAGELESGNAGEPAK 2 Oxidation (M) |
| 201 - 209   | 1078.60  | 1077.60   | 1077.58   | 0.01  | 1 YREAAADIK                               |
| 213 - 227   | 1712.74  | 1711.74   | 1711.75   | -0.01 | 0 MCCLFINDLDAGAGR                         |
| 213 - 227   | 1728.77  | 1727.76   | 1727.74   | 0.02  | 0 MCCLFINDLDAGAGR Oxidation (M)           |
| 264 - 287   | 2700.42  | 2699.42   | 2699.43   | -0.01 | 1 EDNPRVPIIVTGDNDFSTLYAPLIR               |
| 269 - 287   | 2089.17  | 2088.16   | 2088.16   | 0.00  | 0 VPIIVTGDNDFSTLYAPLIR                    |
| 294 - 300   | 940.48   | 939.48    | 939.46    | 0.02  | 0 FYWAPTR                                 |
| 294 - 303   | 1326.63  | 1325.62   | 1325.62   | 0.01  | 1 FYWAPTRDDR                              |
| 309 - 323   | 1717.87  | 1716.87   | 1716.87   | -0.00 | 1 GIFRTDNPDEDIVK                          |
| 324 - 340   | 1868.95  | 1867.95   | 1867.95   | 0.00  | 0 IVDSFPGQSIDFFGALR                       |
| 343 - 349   | 895.42   | 894.42    | 894.41    | 0.01  | 0 VYDDEVK                                 |
| 351 - 363   | 1460.74  | 1459.74   | 1459.74   | -0.00 | 1 WVSDTGVENIGKR                           |
| 400 - 422   | 2496.20  | 2495.20   | 2495.20   | 0.00  | 1 RVQLAEQYLSEAAALGDANSAMK Oxidation (M)   |

## Spot 1882

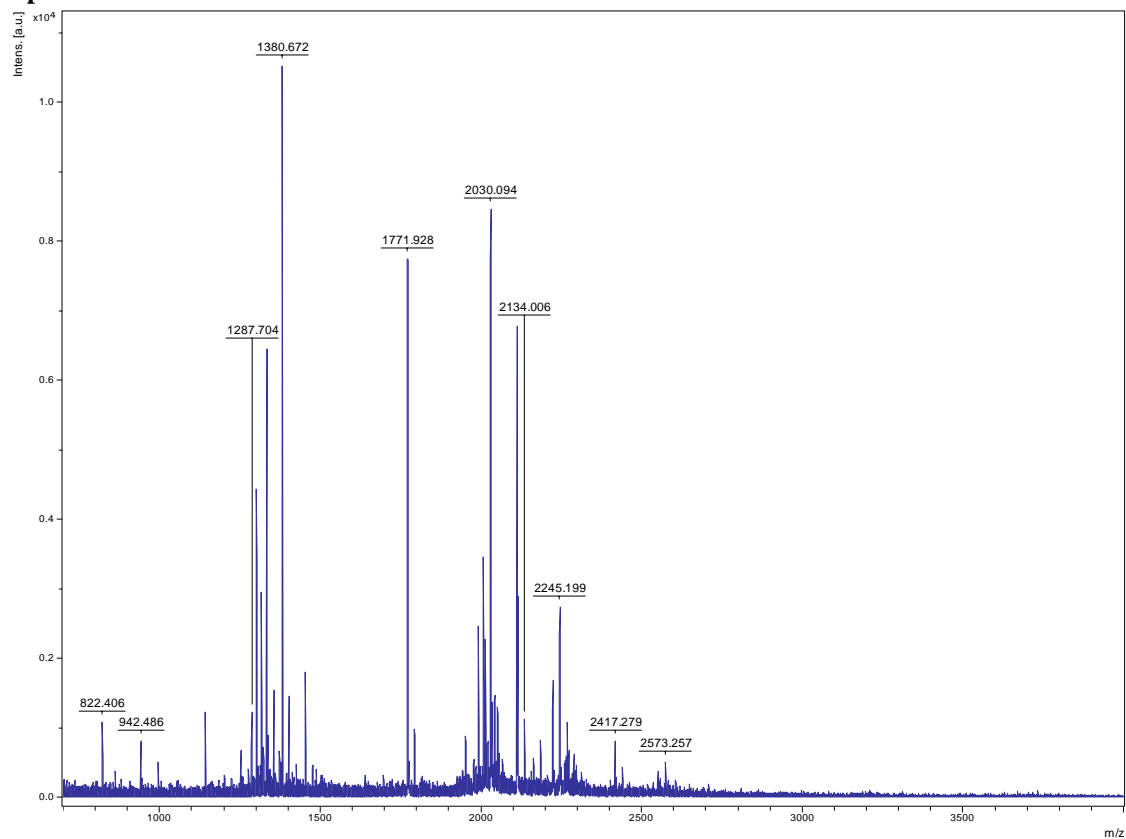

Match to: gi|38347227; Score: 128

### Matched peptides:

| Start - End | Observed | Mr (expt) | Mr (calc) | Delta | Miss Sequence                            |
|-------------|----------|-----------|-----------|-------|------------------------------------------|
| 5 - 16      | 1380.67  | 1379.67   | 1379.67   | -0.00 | 0 SPYFVPESEGR                            |
| 17 - 26     | 942.49   | 941.48    | 941.49    | -0.01 | 0 AGESPAAALR                             |
| 28 - 47     | 2112.02  | 2111.01   | 2111.00   | -0.01 | 0 ILASPGAHQAPCCFDALGAR                   |
| 69 - 87     | 1990.97  | 1989.97   | 1989.98   | -0.02 | 0 LGLPDAGLISYGEMVDQGR                    |
| 69 - 87     | 2006.98  | 2005.98   | 2005.98   | -0.00 | 0 LGLPDAGLISYGEMVDQGR Oxidation (M)      |
| 163 - 174   | 1287.70  | 1286.70   | 1286.72   | -0.02 | 1 KESGSDIVHAR                            |
| 179 - 189   | 1284.66  | 1283.65   | 1283.65   | -0.00 | 0 QAISIDEALWR Pyro-glu (N-term Q)        |
| 179 - 189   | 1301.67  | 1300.67   | 1300.68   | -0.01 | 0 QAISIDEALWR                            |
| 274 - 290   | 1771.93  | 1770.93   | 1770.93   | -0.00 | 0 STGAPRPGSLPSFQEIK                      |
| 291 - 297   | 822.41   | 821.40    | 821.40    | -0.00 | 0 DTLGFNR                                |
| 304 - 321   | 2013.05  | 2012.04   | 2012.07   | -0.03 | 0 QYATVQQAQPLSTNIVLR Pyro-glu (N-term Q) |
| 304 - 321   | 2030.09  | 2029.09   | 2029.10   | -0.00 | 0 QYATVQQAQPLSTNIVLR                     |
| 333 - 344   | 1253.70  | 1252.70   | 1252.70   | -0.01 | 0 INEGIPAGILEK                           |
| 348 - 369   | 2223.23  | 2222.23   | 2222.19   | -0.04 | 0 AIPGLAGVNLTEILQGADQSQK                 |
| 372 - 383   | 1373.69  | 1372.69   | 1372.69   | -0.01 | 1 LLLDREDATGDR                           |

# Spot 1886

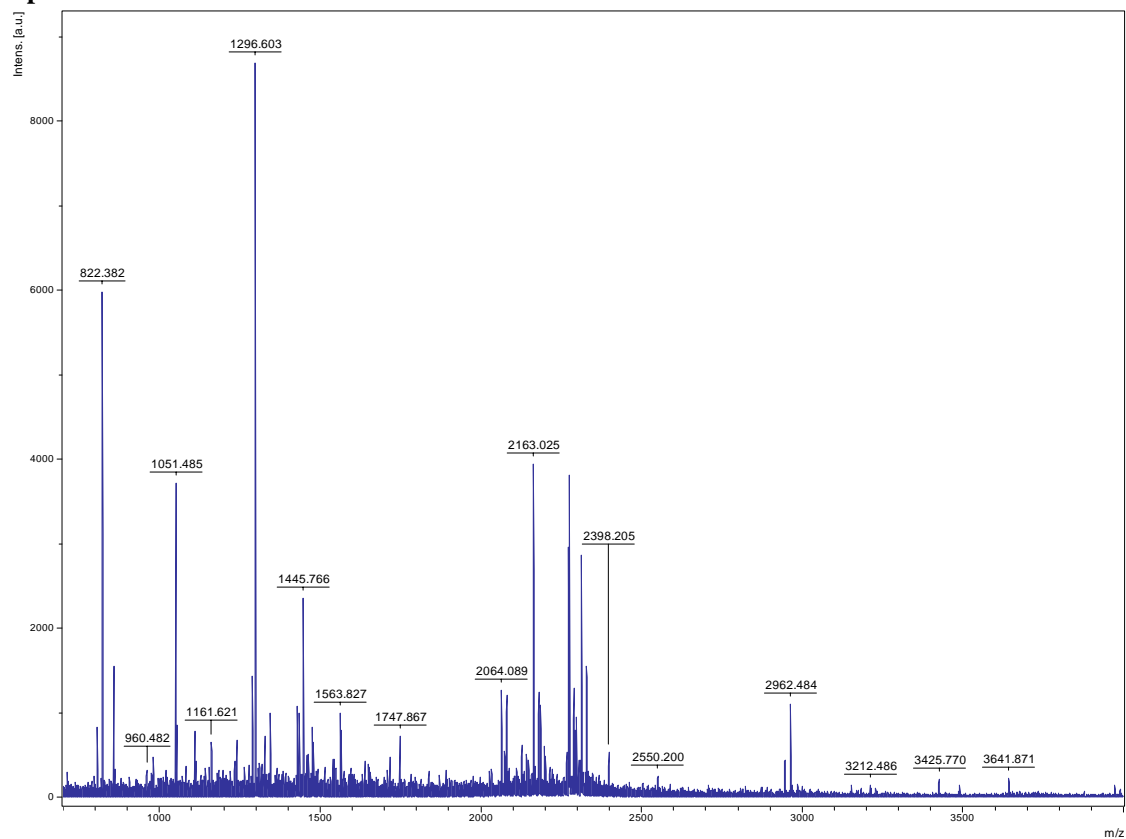

Match to: gi|78708994 Score: 137 Expect: 3.3e-08

## Matched peptides:

| Start - End | Observed  | Mr (expt) | Mr (calc) | Delta   | Miss Sequence                                                 |
|-------------|-----------|-----------|-----------|---------|---------------------------------------------------------------|
| 58 - 77     | 2064.0886 | 2063.0813 | 2063.1058 | -0.0244 | 0 R.AAVLNRPGHLNALTTMGAR.L                                     |
| 58 - 77     | 2080.0872 | 2079.0799 | 2079.1007 | -0.0208 | 0 R.AAVLNRPGHLNALTTMGAR.L Oxidation (M)                       |
| 81 - 97     | 2125.9382 | 2124.9310 | 2124.8994 | 0.0315  | 0 K.FYMSWEDNPDIGFVMMKG Oxidation (M)                          |
| 102 - 111   | 1051.4851 | 1050.4778 | 1050.4916 | -0.0138 | 0 R.AFCAGGDVVR.L Carbamidomethyl (C)                          |
| 212 - 231   | 2180.0278 | 2179.0206 | 2179.0401 | -0.0196 | 0 K.LNGVDMIALGLATHYSMSDR.L Oxidation (M)                      |
| 212 - 231   | 2196.0122 | 2195.0049 | 2195.0350 | -0.0301 | 0 K.LNGVDMIALGLATHYSMSDR.L 2 Oxidation (M)                    |
| 232 - 238   | 858.4661  | 857.4588  | 857.4606  | -0.0018 | 0 R.LNLVDER.L                                                 |
| 239 - 265   | 2962.4836 | 2961.4764 | 2961.4859 | -0.0095 | 0 R.LATLLTDDPSVIDTSLTHYGDLYPPDK.S                             |
| 239 - 271   | 3641.8708 | 3640.8636 | 3640.8624 | 0.0012  | 1 R.LATLLTDDPSVIDTSLTHYGDLYPPDKSSIVHR.L                       |
| 278 - 297   | 2312.0664 | 2311.0591 | 2311.0711 | -0.0120 | 0 K.CFSLETVEEIVDAMEIEAAR.L Carbamidomethyl (C)                |
| 278 - 297   | 2328.0559 | 2327.0486 | 2327.0660 | -0.0174 | 0 K.CFSLETVEEIVDAMEIEAAR.L Carbamidomethyl (C); Oxidation (M) |
| 298 - 308   | 1289.6448 | 1288.6375 | 1288.6663 | -0.0288 | 0 R.LNEDWSTLALK.R                                             |
| 298 - 309   | 1445.7664 | 1444.7591 | 1444.7674 | -0.0083 | 1 R.LNEDWSTLALK.R.L                                           |
| 330 - 339   | 1296.6030 | 1295.5958 | 1295.6180 | -0.0222 | 0 R.YQTLDECLVRE Carbamidomethyl (C)                           |
| 352 - 357   | 822.3820  | 821.3747  | 821.3820  | -0.0073 | 0 K.FSHEFRE                                                   |



# Spot 1898

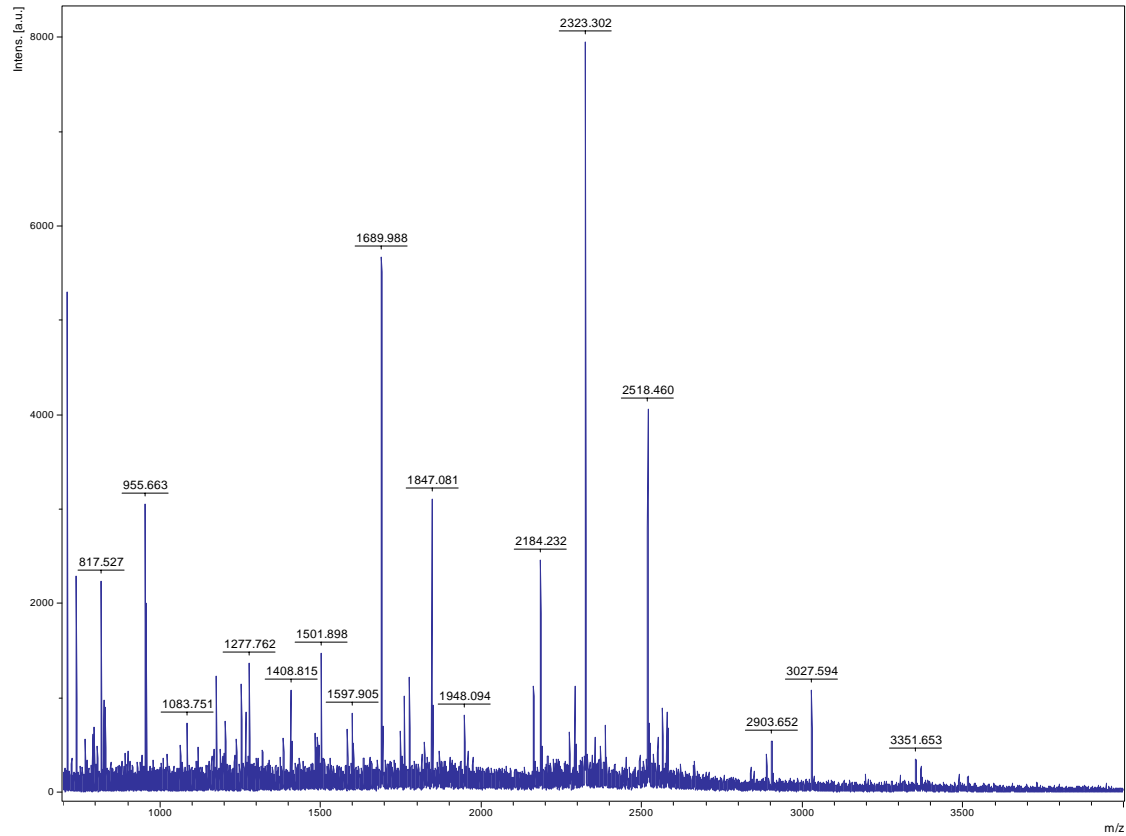

Match to: gi|21263611 Score: 78 Expect: 0.00097

## Matched peptides:

| Start - End | Observed  | Mr (expt) | Mr (calc) | Delta   | Miss Sequence                                       |
|-------------|-----------|-----------|-----------|---------|-----------------------------------------------------|
| 1 - 14      | 1598.8328 | 1597.8255 | 1597.7969 | 0.0286  | 1 -.MAMWRAAAGHLLGR.A Acetyl (N-term); Oxidation (M) |
| 37 - 58     | 2308.1272 | 2307.1199 | 2307.0952 | 0.0247  | 1 K.GGEYADKNPNFVGCVEGALGIR.E Acetyl (N-term)        |
| 37 - 58     | 2323.1269 | 2322.1196 | 2322.1062 | 0.0135  | 1 K.GGEYADKNPNFVGCVEGALGIR.E Carbamidomethyl (C)    |
| 44 - 58     | 1602.7962 | 1601.7889 | 1601.7983 | -0.0094 | 0 K.NPNFVGCVEGALGIR.E Carbamidomethyl (C)           |
| 65 - 83     | 2184.0622 | 2183.0549 | 2183.0494 | 0.0055  | 1 K.GHHYIVTDDKGLNSELEK.H                            |
| 84 - 105    | 2563.2269 | 2562.2196 | 2562.2689 | -0.0493 | 0 K.HIEDMHVLTITPFHPAYVSAER.I                        |
| 162 - 183   | 2518.2542 | 2517.2469 | 2517.2552 | -0.0083 | 0 R.NFLPGYQVVHGEWNVAGIAYR.A                         |
| 208 - 220   | 1689.8906 | 1688.8833 | 1688.8457 | 0.0377  | 0 R.LKPFNCNLLYHDR.L Carbamidomethyl (C)             |
| 223 - 234   | 1383.8295 | 1382.8222 | 1382.7292 | 0.0930  | 1 K.IDPELEKEIGAK.Y Acetyl (N-term)                  |
| 230 - 245   | 1821.9570 | 1820.9497 | 1820.8866 | 0.0632  | 1 K.EIGAKYEEDLDAMLPK.C                              |
| 246 - 258   | 1501.8194 | 1500.8121 | 1500.7858 | 0.0264  | 0 K.CDVIVINTPLTEK.T Carbamidomethyl (C)             |
| 273 - 282   | 1083.6317 | 1082.6244 | 1082.6560 | -0.0315 | 1 K.KGVIIVNNAR.G                                    |
| 274 - 282   | 955.5155  | 954.5082  | 954.5610  | -0.0528 | 0 K.GVIIVNNAR.G                                     |
| 321 - 341   | 2354.1638 | 2353.1565 | 2353.1307 | 0.0258  | 0 R.YMPNHAMTPHISGTTIDAQLR.Y                         |
| 321 - 341   | 2386.0924 | 2385.0851 | 2385.1205 | -0.0354 | 0 R.YMPNHAMTPHISGTTIDAQLR.Y 2 Oxidation (M)         |
| 342 - 352   | 1238.6466 | 1237.6393 | 1237.6125 | 0.0269  | 1 R.YAAGVKDMLDR.Y                                   |
| 342 - 352   | 1254.6144 | 1253.6071 | 1253.6074 | -0.0003 | 1 R.YAAGVKDMLDR.Y Oxidation (M)                     |
| 353 - 367   | 1846.9783 | 1845.9710 | 1845.9301 | 0.0410  | 1 R.YFKGEDFPVQNYIVK.E                               |
| 356 - 367   | 1408.7394 | 1407.7321 | 1407.7034 | 0.0288  | 0 K.GEDFPVQNYIVK.E                                  |
| 368 - 376   | 1023.4459 | 1022.4386 | 1022.4669 | -0.0282 | 0 K.EGQLASQYQ.-                                     |

## Spot 1908

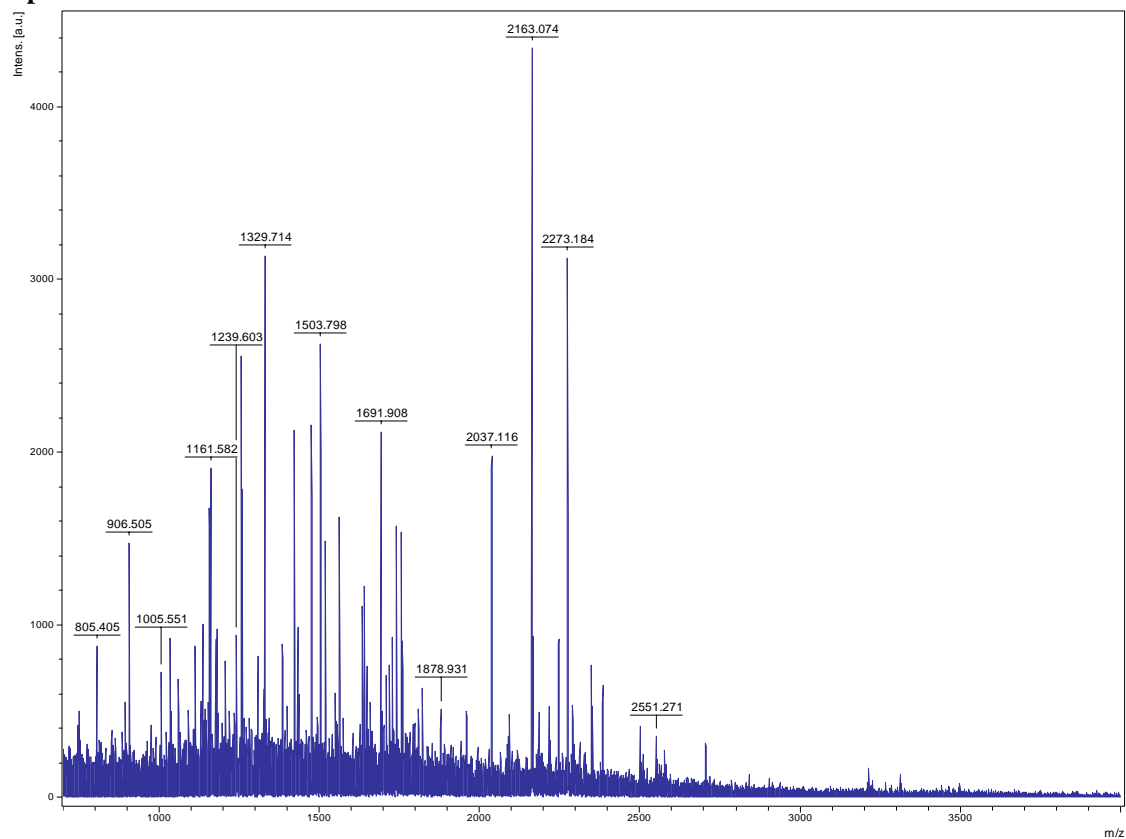

Match to: gi|37700305; Score: 167

### Matched peptides:

| Start - End | Observed | Mr (expt) | Mr (calc) | Delta | Miss Sequence             |
|-------------|----------|-----------|-----------|-------|---------------------------|
| 7 - 18      | 1329.71  | 1328.71   | 1328.72   | -0.01 | 0 VSIHQTSFALR             |
| 19 - 35     | 1503.80  | 1502.80   | 1502.80   | 0.00  | 0 LAAALSSPAHPAGGAGR       |
| 138 - 151   | 1517.75  | 1516.75   | 1516.75   | -0.00 | 0 AAEVASQVNSWVEK          |
| 159 - 171   | 1421.72  | 1420.72   | 1420.73   | -0.01 | 0 EILPPGSDHTTR            |
| 172 - 181   | 1137.65  | 1136.64   | 1136.66   | -0.02 | 0 LVLGNALYFK              |
| 182 - 192   | 1239.60  | 1238.60   | 1238.59   | 0.01  | 1 GAWTEKFDASK             |
| 195 - 204   | 1130.55  | 1129.54   | 1129.54   | 0.00  | 0 DGEFHLLDGG              |
| 216 - 226   | 1384.74  | 1383.74   | 1383.74   | -0.00 | 1 KQYILSYDNLK             |
| 217 - 226   | 1256.64  | 1255.64   | 1255.64   | -0.01 | 0 QYILSYDNLK              |
| 230 - 238   | 1005.55  | 1004.55   | 1004.49   | 0.06  | 0 LPYQQGGDK               |
| 230 - 239   | 1161.58  | 1160.58   | 1160.59   | -0.01 | 1 LPYQQGGDKR              |
| 261 - 270   | 1205.59  | 1204.59   | 1204.60   | -0.01 | 0 LNSEPEFLEK              |
| 276 - 283   | 906.51   | 905.50    | 905.50    | 0.01  | 0 QVTVGQFK                |
| 325 - 334   | 1177.60  | 1176.60   | 1176.63   | -0.03 | 0 NLFVSSVFHK              |
| 335 - 357   | 2349.22  | 2348.22   | 2348.19   | 0.03  | 0 SFVEVNEEGTEAAAATAAVITLR |

Match to: gi|21685576; Score: 73

### Matched peptides:

| Start - End | Observed | Mr (expt) | Mr (calc) | Delta | Miss Sequence                   |
|-------------|----------|-----------|-----------|-------|---------------------------------|
| 99 - 112    | 1561.77  | 1560.76   | 1560.77   | -0.00 | 1 AVAFDEIDKAPEEK                |
| 115 - 130   | 1759.91  | 1758.91   | 1758.93   | -0.02 | 1 GITIATAHVYETAKR               |
| 211 - 227   | 2037.12  | 2036.11   | 2036.10   | 0.02  | 1 ELLSFYKFPGEIPIIR              |
| 218 - 227   | 1156.62  | 1155.62   | 1155.63   | -0.01 | 0 FPGDEIPIIR                    |
| 249 - 262   | 1632.79  | 1631.78   | 1631.79   | -0.00 | 0 LMDAVDEYIPDPVR                |
| 249 - 262   | 1648.78  | 1647.78   | 1647.78   | -0.00 | 0 LMDAVDEYIPDPVR Oxidation (M)  |
| 267 - 281   | 1738.88  | 1737.88   | 1737.88   | 0.00  | 0 SFLMPIEDVFSIQGR               |
| 267 - 281   | 1754.89  | 1753.88   | 1753.87   | 0.01  | 0 SFLMPIEDVFSIQGR Oxidation (M) |
| 296 - 312   | 1725.91  | 1724.91   | 1724.92   | -0.01 | 0 TGEDVEILGLTPSGPLK             |
| 313 - 323   | 1256.64  | 1255.64   | 1255.65   | -0.01 | 1 TTVTGVEMFKK Oxidation (M)     |
| 324 - 339   | 1691.91  | 1690.91   | 1690.90   | 0.01  | 0 ILDHGEAGDNVGLLLR              |

## Spot 1913

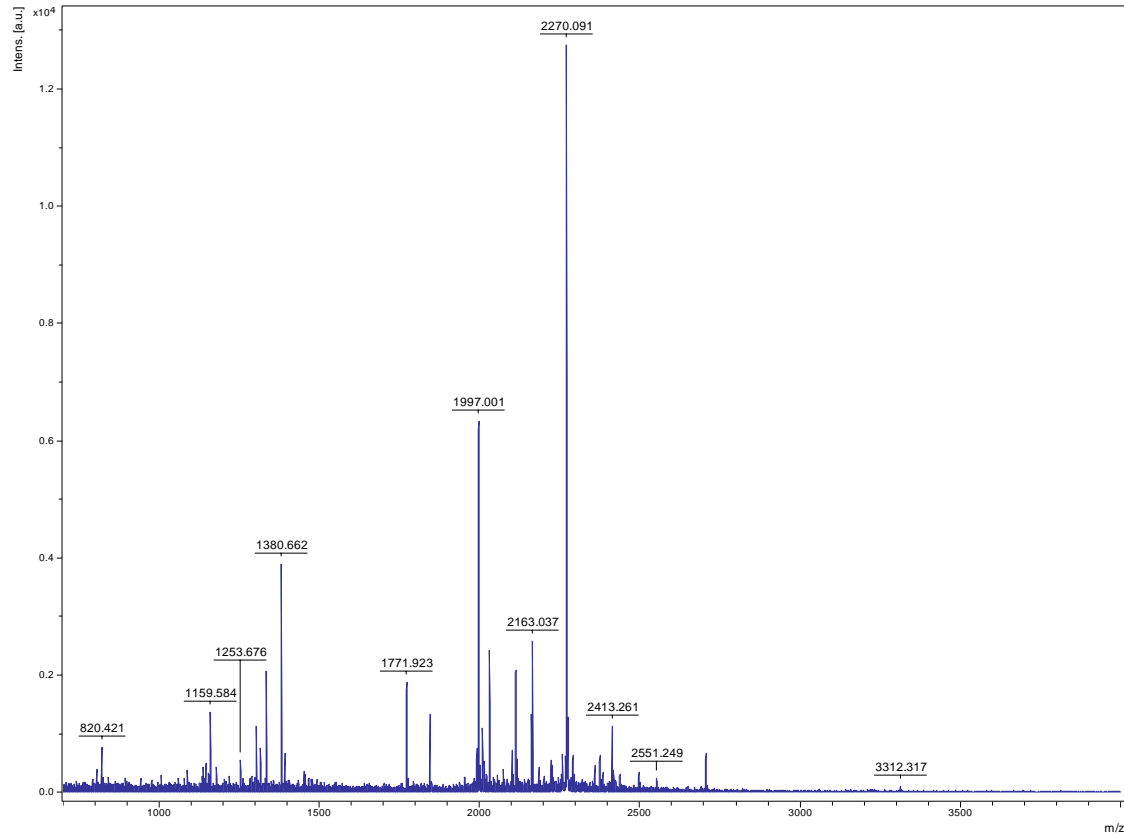

Match to: gi|38347227; Score: 126

### Matched peptides:

| Start - End | Observed | Mr (expt) | Mr (calc) | Delta | Miss Sequence                            |
|-------------|----------|-----------|-----------|-------|------------------------------------------|
| 5 - 16      | 1380.66  | 1379.66   | 1379.67   | -0.01 | 0 SPYFVPESEGR                            |
| 28 - 47     | 2112.00  | 2111.00   | 2111.00   | -0.01 | 0 ILASPGAHQAPCCFDALGAR                   |
| 69 - 87     | 1990.96  | 1989.96   | 1989.98   | -0.02 | 0 LGLPDAGLISYGEMVDQGR                    |
| 69 - 87     | 2006.96  | 2005.96   | 2005.98   | -0.02 | 0 LGLPDAGLISYGEMVDQGR Oxidation (M)      |
| 117 - 135   | 2009.99  | 2008.99   | 2008.99   | -0.00 | 0 GYNAGFAGIMLEDQVAPK Oxidation (M)       |
| 164 - 174   | 1159.58  | 1158.58   | 1158.62   | -0.04 | 0 ESGSDIVIIAR                            |
| 179 - 189   | 1301.66  | 1300.66   | 1300.68   | -0.02 | 0 QAISIDEALWR                            |
| 274 - 290   | 1771.92  | 1770.92   | 1770.93   | -0.01 | 0 STGAPRPGSLPSFQEIK                      |
| 291 - 297   | 822.38   | 821.38    | 821.40    | -0.02 | 0 DTLGFNR                                |
| 304 - 321   | 2013.02  | 2012.02   | 2012.07   | -0.05 | 0 QYATVQQAQPLSTNIVLR Pyro-glu (N-term Q) |
| 304 - 321   | 2030.07  | 2029.07   | 2029.10   | -0.03 | 0 QYATVQQAQPLSTNIVLR                     |
| 333 - 344   | 1253.68  | 1252.67   | 1252.70   | -0.03 | 0 INEGIPAGILEK                           |
| 345 - 369   | 2551.25  | 2550.25   | 2550.40   | -0.16 | 1 ISKAIPLAGVNLTEILQGADQSQK               |
| 348 - 369   | 2223.18  | 2222.18   | 2222.19   | -0.01 | 0 AIPGLAGVNLTEILQGADQSQK                 |

Match to: gi|50918915; Score: 83

### Matched peptides:

| Start - End | Observed | Mr (expt) | Mr (calc) | Delta | Miss Sequence                           |
|-------------|----------|-----------|-----------|-------|-----------------------------------------|
| 116 - 136   | 1997.00  | 1996.00   | 1996.01   | -0.01 | 0 AHAPAAVASGAVVVDNSSAFR                 |
| 137 - 157   | 2375.15  | 2374.15   | 2374.17   | -0.02 | 0 MDPEVPLVIPEVNPEAMAHVR 2 Oxidation (M) |
| 190 - 210   | 2100.98  | 2099.98   | 2099.99   | -0.01 | 0 MVVSTYQAASGAGAAAMEELK Oxidation (M)   |
| 190 - 210   | 2116.97  | 2115.96   | 2115.98   | -0.02 | 0 MVVSTYQAASGAGAAAMEELK 2 Oxidation (M) |
| 211 - 220   | 1086.59  | 1085.58   | 1085.61   | -0.02 | 0 LQTQEVLAGK                            |
| 269 - 275   | 820.42   | 819.42    | 819.43    | -0.01 | 0 VTATCIR                               |
| 281 - 300   | 2270.09  | 2269.09   | 2269.10   | -0.01 | 0 AHAESVNLQFEKPLDEDTAR                  |
| 305 - 315   | 1159.58  | 1158.58   | 1158.59   | -0.01 | 0 AAEGVTIHDR                            |
| 320 - 336   | 1844.92  | 1843.92   | 1843.93   | -0.01 | 1 FPTPLEVSDKDDVAVGR                     |
| 348 - 359   | 1392.69  | 1391.69   | 1391.69   | -0.00 | 0 GLDIFVCGDQIR                          |

# Spot 1914

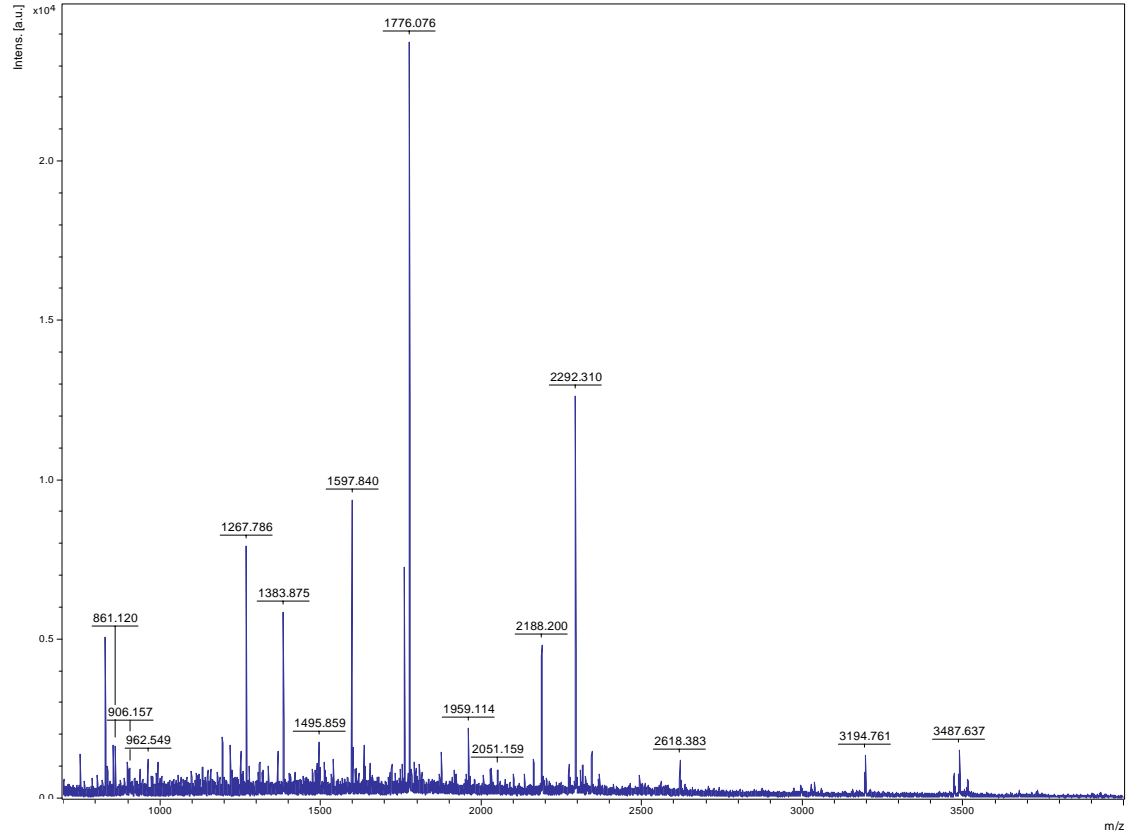

Match to: gi|19387272 Score: 82 Expect: 0.00044

## Matched peptides:

| Start - End | Observed  | Mr (expt) | Mr (calc) | Delta   | Miss Sequence                                      |
|-------------|-----------|-----------|-----------|---------|----------------------------------------------------|
| 75 - 90     | 1776.0762 | 1775.0689 | 1774.9617 | -0.1072 | 0 K.IIAEYIWWGGTGIDLR.S                             |
| 109 - 139   | 3487.6372 | 3486.6299 | 3486.6367 | -0.0068 | 1 K.WNYDGSSTGQAPGEDSEVILYPQAIFKDPFR.G              |
| 140 - 163   | 2618.3826 | 2617.3753 | 2617.2628 | 0.1125  | 1 R.GGNNILVMCDTYTPAGEPIPTNKR.N Carbamidomethyl (C) |
| 166 - 174   | 962.5491  | 961.5418  | 961.4869  | 0.0549  | 0 R.AAQVFSDPK.V                                    |
| 175 - 193   | 2292.3103 | 2291.3030 | 2291.1949 | 0.1081  | 0 K.VVSQVPWFGIEQEYTLQR.D                           |
| 280 - 308   | 3194.7610 | 3193.7537 | 3193.7896 | -0.0359 | 1 R.ITEQAGVVLTLDPKPIQADSVICFVIRLR.L                |
| 309 - 318   | 1218.8131 | 1217.8058 | 1217.7166 | 0.0893  | 1 R.LILQITKSMR.E Oxidation (M)                     |
| 316 - 327   | 1367.7574 | 1366.7502 | 1366.6550 | 0.0951  | 1 K.SMREDDGGFEVIK.K                                |
| 319 - 327   | 993.6176  | 992.6103  | 992.4814  | 0.1289  | 0 R.EDGGFEVIK.K                                    |
| 329 - 336   | 899.6486  | 898.6413  | 898.5600  | 0.0814  | 0 K.AILNLSLR.H                                     |
| 337 - 350   | 1597.8398 | 1596.8326 | 1596.7280 | 0.1045  | 0 R.HDLHISAYGEGNER.R                               |
| 337 - 351   | 1753.9487 | 1752.9415 | 1752.8291 | 0.1123  | 1 R.HDLHISAYGEGNERR.L                              |
| 351 - 371   | 2344.2766 | 2343.2693 | 2343.1719 | 0.0974  | 1 R.RLTGLHETASIDNFSWGVANR.G                        |
| 352 - 371   | 2188.2000 | 2187.1927 | 2187.0708 | 0.1219  | 0 R.LTGLHETASIDNFSWGVANR.G                         |
| 385 - 392   | 937.5633  | 936.5560  | 936.4664  | 0.0896  | 1 K.GKGYLEDLR.R                                    |

## Spot 1932

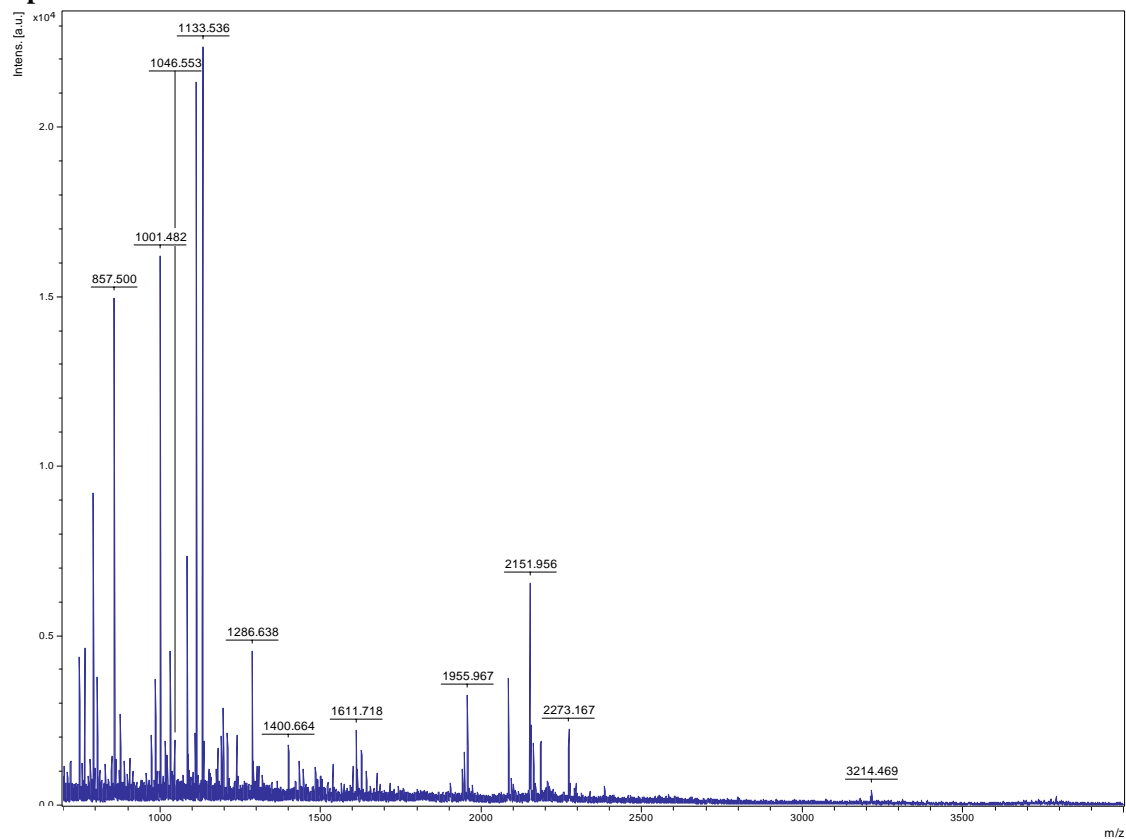

Match to: gi|37535646 Score: 164 Expect: 2.7e-12

### Matched peptides:

| Start - End | Observed  | Mr (expt) | Mr (calc) | Delta   | Miss Sequence                               |
|-------------|-----------|-----------|-----------|---------|---------------------------------------------|
| 1 - 14      | 1433.6928 | 1432.6855 | 1432.6729 | 0.0127  | 1 -.MARASSSSPPSPR.L Oxidation (M)           |
| 85 - 97     | 1302.6374 | 1301.6301 | 1301.6826 | -0.0525 | 0 R.ETADALVNTGLAK.L                         |
| 98 - 114    | 2151.9112 | 2150.9039 | 2150.9367 | -0.0328 | 0 K.LGYQYVNIDDCWAEYSR.D Carbamidomethyl (C) |
| 145 - 159   | 1600.6897 | 1599.6824 | 1599.7198 | -0.0374 | 0 K.LGIYSDAGSQTCSENK.M Carbamidomethyl (C)  |
| 160 - 172   | 1484.6451 | 1483.6378 | 1483.6613 | -0.0234 | 0 K.MPGSLDHEEQVK.T                          |
| 173 - 183   | 1286.6078 | 1285.6005 | 1285.6342 | -0.0337 | 0 K.TFASWGVVDYLYK.Y                         |
| 173 - 192   | 2295.1205 | 2294.1132 | 2294.0062 | -0.1071 | 1 K.TFASWGVVDYLYK.YDNCNDAGR.S               |
| 184 - 192   | 1084.3681 | 1083.3608 | 1083.4039 | -0.0431 | 0 K.YDNCNDAGR.S Carbamidomethyl (C)         |
| 198 - 206   | 1133.4997 | 1132.4924 | 1132.5005 | -0.0081 | 1 R.YTRMSNAMK.T 2 Oxidation (M)             |
| 211 - 221   | 1400.6243 | 1399.6170 | 1399.6594 | -0.0424 | 0 K.NIFFSLCEWGR.E Carbamidomethyl (C)       |
| 222 - 230   | 1001.4109 | 1000.4036 | 1000.4726 | -0.0690 | 0 K.ENPATWAGR.M                             |
| 237 - 251   | 1611.6698 | 1610.6625 | 1610.6995 | -0.0369 | 0 R.TTGDADNWGSMSTR.A                        |
| 237 - 251   | 1627.6868 | 1626.6795 | 1626.6944 | -0.0149 | 0 R.TTGDADNWGSMSTR.A Oxidation (M)          |
| 297 - 306   | 1113.5511 | 1112.5438 | 1112.6012 | -0.0574 | 0 K.APLLIQCDVRS Carbamidomethyl (C)         |
| 314 - 334   | 2185.0564 | 2184.0491 | 2184.1385 | -0.0894 | 0 K.NILSNSEVIQVQDQLGVQGGK.K                 |
| 336 - 353   | 1955.9392 | 1954.9319 | 1954.9496 | -0.0177 | 0 K.VQSDNGLEVWAGPLSNNR.K                    |
| 336 - 354   | 2084.0252 | 2083.0179 | 2083.0446 | -0.0267 | 1 K.VQSDNGLEVWAGPLSNNR.K.A                  |
| 354 - 361   | 985.5223  | 984.5150  | 984.5868  | -0.0718 | 1 R.KAVVLWNR.Q                              |

## Spot 1939

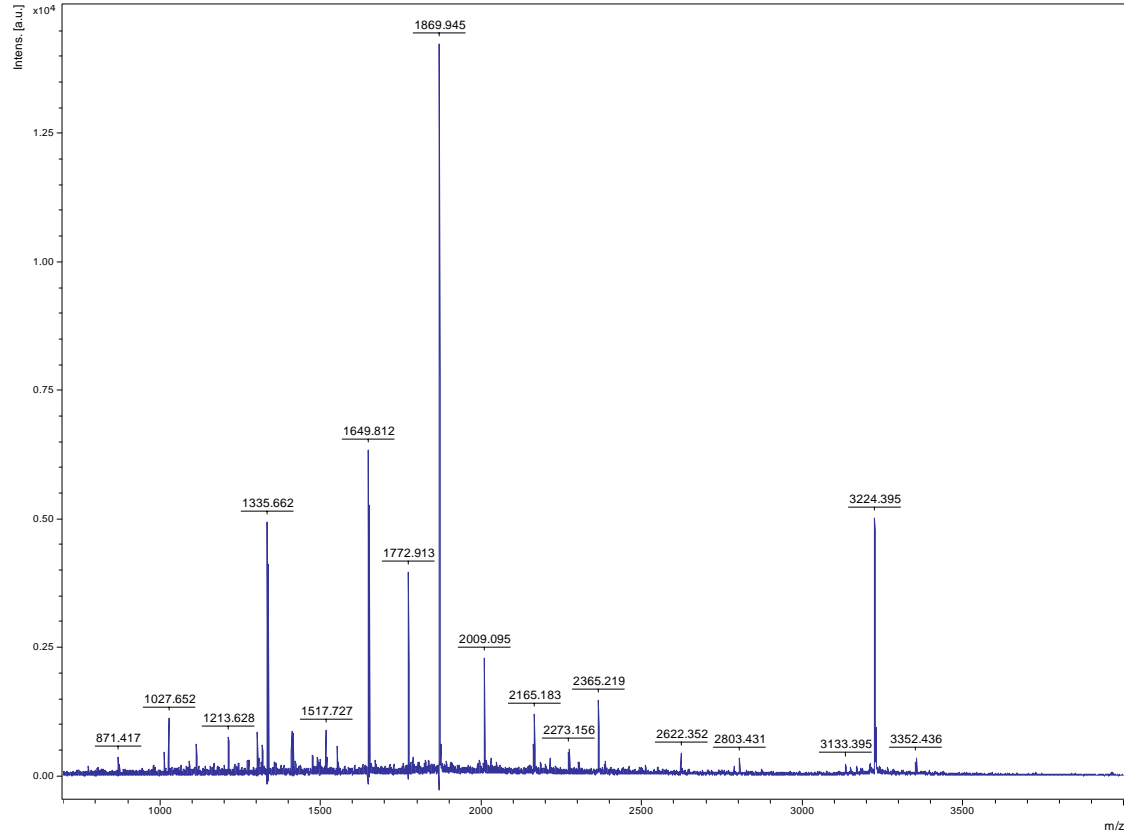

Match to: gi|51964178 Score: 182 Expect: 4.2e-14

### Matched peptides:

| Start - End | Observed  | Mr (expt) | Mr (calc) | Delta   | Miss Sequence                                                 |
|-------------|-----------|-----------|-----------|---------|---------------------------------------------------------------|
| 33 - 42     | 1114.5796 | 1113.5723 | 1113.6029 | -0.0306 | 0 K.LNNAILAEKH                                                |
| 43 - 53     | 1303.6129 | 1302.6056 | 1302.6278 | -0.0222 | 0 K.HLPMYDELASK.G                                             |
| 43 - 53     | 1319.6297 | 1318.6224 | 1318.6227 | -0.0003 | 0 K.HLPMYDELASK.G Oxidation (M)                               |
| 54 - 69     | 1649.8290 | 1648.8217 | 1648.8168 | 0.0049  | 0 K.GNVEYIAGGATQNSIR.V                                        |
| 70 - 89     | 2215.0569 | 2214.0496 | 2214.0271 | 0.0225  | 0 R.VAQWMLQTPGATSYMGCIGK.D Carbamidomethyl (C); Oxidation (M) |
| 130 - 142   | 1410.6760 | 1409.6687 | 1409.6972 | -0.0285 | 0 R.SLVANLSAANCYK.S Carbamidomethyl (C)                       |
| 148 - 157   | 1213.6213 | 1212.6140 | 1212.6502 | -0.0362 | 0 K.KPENWALVEK.A                                              |
| 209 - 224   | 1869.9531 | 1868.9458 | 1868.9308 | 0.0150  | 0 K.VLPFVDYIFGNETEAR.I                                        |
| 229 - 243   | 1772.9227 | 1771.9154 | 1771.9104 | 0.0050  | 1 K.VRGWETENVEEIALK.I                                         |
| 231 - 243   | 1517.7443 | 1516.7370 | 1516.7409 | -0.0039 | 0 R.GWETENVEEIALK.I                                           |
| 244 - 253   | 1013.5438 | 1012.5365 | 1012.5917 | -0.0551 | 0 K.ISQLPLASGK.Q                                              |
| 256 - 276   | 2165.1754 | 2164.1681 | 2164.1851 | -0.0170 | 1 K.RIAVITQGADPVVVAEDGQVK.T                                   |
| 257 - 276   | 2009.0947 | 2008.0874 | 2008.0840 | 0.0034  | 0 R.IAVITQGADPVVVAEDGQVK.T                                    |
| 277 - 285   | 1027.6067 | 1026.5994 | 1026.6477 | -0.0483 | 0 K.TFPVILLPK.E                                               |
| 286 - 310   | 2621.2833 | 2620.2760 | 2620.3496 | -0.0735 | 1 K.EKLVDTNGAGDAFVGGFLSQLVQQK.S                               |
| 288 - 310   | 2364.2089 | 2363.2016 | 2363.2120 | -0.0104 | 0 K.LVDTNGAGDAFVGGFLSQLVQQK.S                                 |
| 318 - 329   | 1335.6697 | 1334.6624 | 1334.6765 | -0.0140 | 0 K.AGCYAAANVIQR.S Carbamidomethyl (C)                        |
| 330 - 341   | 1414.5732 | 1413.5659 | 1413.5871 | -0.0211 | 0 R.SGCTYPEKPDFN.- Carbamidomethyl (C)                        |

## Spot 1942

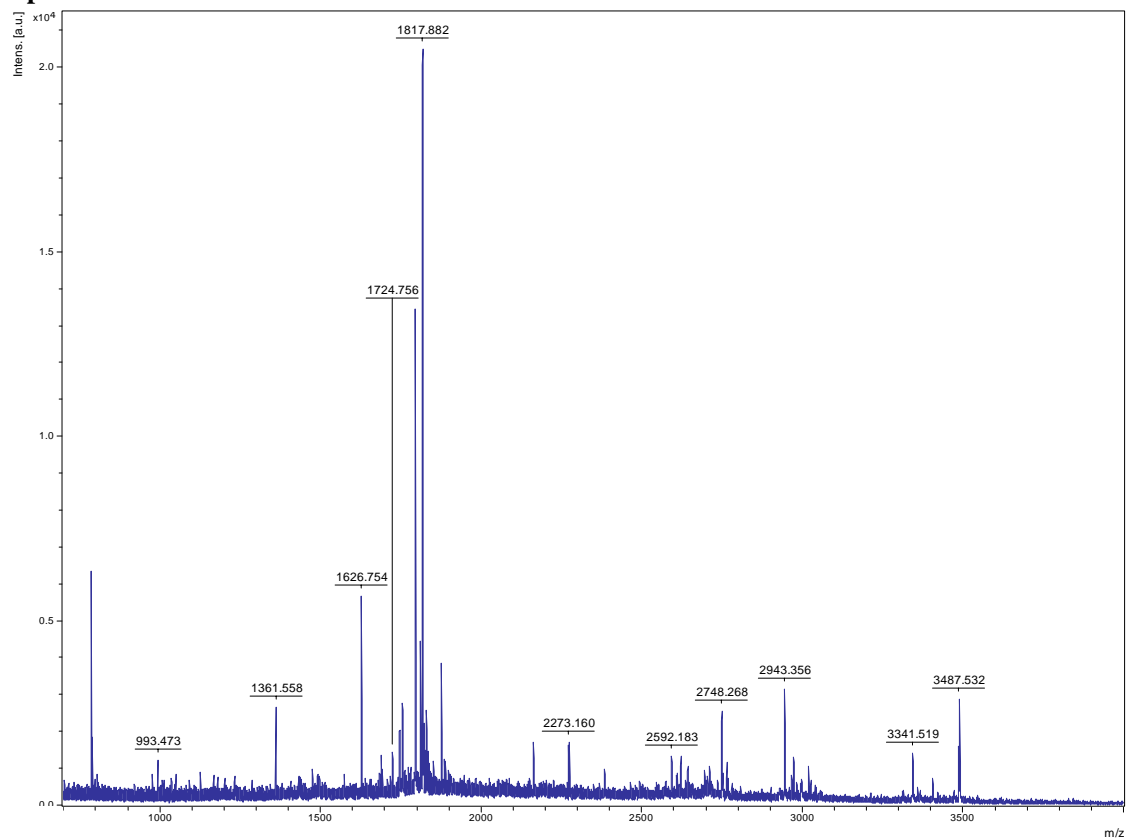

Match to: gi|50912511 Score: 80 Expect: 0.00069

### Matched peptides:

| Start - End | Observed  | Mr (expt) | Mr (calc) | Delta   | Miss Sequence                       |                                                     |
|-------------|-----------|-----------|-----------|---------|-------------------------------------|-----------------------------------------------------|
| 2 - 18      | 1875.9110 | 1874.9037 | 1874.9473 | -0.0435 | 0 M.ASLTDLVNLNLSDTTEK.I             | Acetyl (N-term)                                     |
| 19 - 34     | 1793.8319 | 1792.8246 | 1792.9181 | -0.0935 | 0 K.IIAEYIWGGSGMDLR.S               |                                                     |
| 19 - 34     | 1809.8631 | 1808.8558 | 1808.9130 | -0.0572 | 0 K.IIAEYIWGGSGMDLR.S               | Oxidation (M)                                       |
| 53 - 79     | 2972.4615 | 2971.4542 | 2971.3875 | 0.0667  | 0 K.WNYDGSSTGQAPGEDSEVILYPAIFK.D    |                                                     |
| 84 - 106    | 2592.2012 | 2591.1939 | 2591.2182 | -0.0242 | 1 R.KGNNILVMCDCYTPAGEPIPTNK.R       | 2 Carbamidomethyl (C)                               |
| 84 - 106    | 2608.2008 | 2607.1935 | 2607.2131 | -0.0196 | 1 R.KGNNILVMCDCYTPAGEPIPTNK.R       | 2 Carbamidomethyl (C); Oxidation (M)                |
| 85 - 106    | 2465.1243 | 2464.1170 | 2464.1072 | 0.0098  | 0 K.GNNILVMCDCYTPAGEPIPTNK.R        | Acetyl (N-term); Carbamidomethyl (C); Oxidation (M) |
| 85 - 107    | 2620.2580 | 2619.2507 | 2619.2243 | 0.0264  | 1 K.GNNILVMCDCYTPAGEPIPTNK.H        | 2 Carbamidomethyl (C)                               |
| 85 - 107    | 2636.2410 | 2635.2337 | 2635.2192 | 0.0145  | 1 K.GNNILVMCDCYTPAGEPIPTNK.H        | 2 Carbamidomethyl (C); Oxidation (M)                |
| 113 - 137   | 2943.4646 | 2942.4573 | 2942.4225 | 0.0348  | 0 K.IFSSPEVASEEPWYGIEQYTLQK.D       |                                                     |
| 224 - 255   | 3341.6921 | 3340.6848 | 3340.6727 | 0.0121  | 0 R.HETAGVVVDFPKPIPDWNGAGAHNTYSTK.S |                                                     |
| 296 - 311   | 1817.7951 | 1816.7878 | 1816.8492 | -0.0614 | 0 R.HETADINTFSWGVANR.G              |                                                     |
| 333 - 356   | 2766.3921 | 2765.3848 | 2765.3768 | 0.0080  | 0 R.RPASNMDPYIVTSMIAETIIWKP.-       | 2 Oxidation (M)                                     |

# Spot 1944

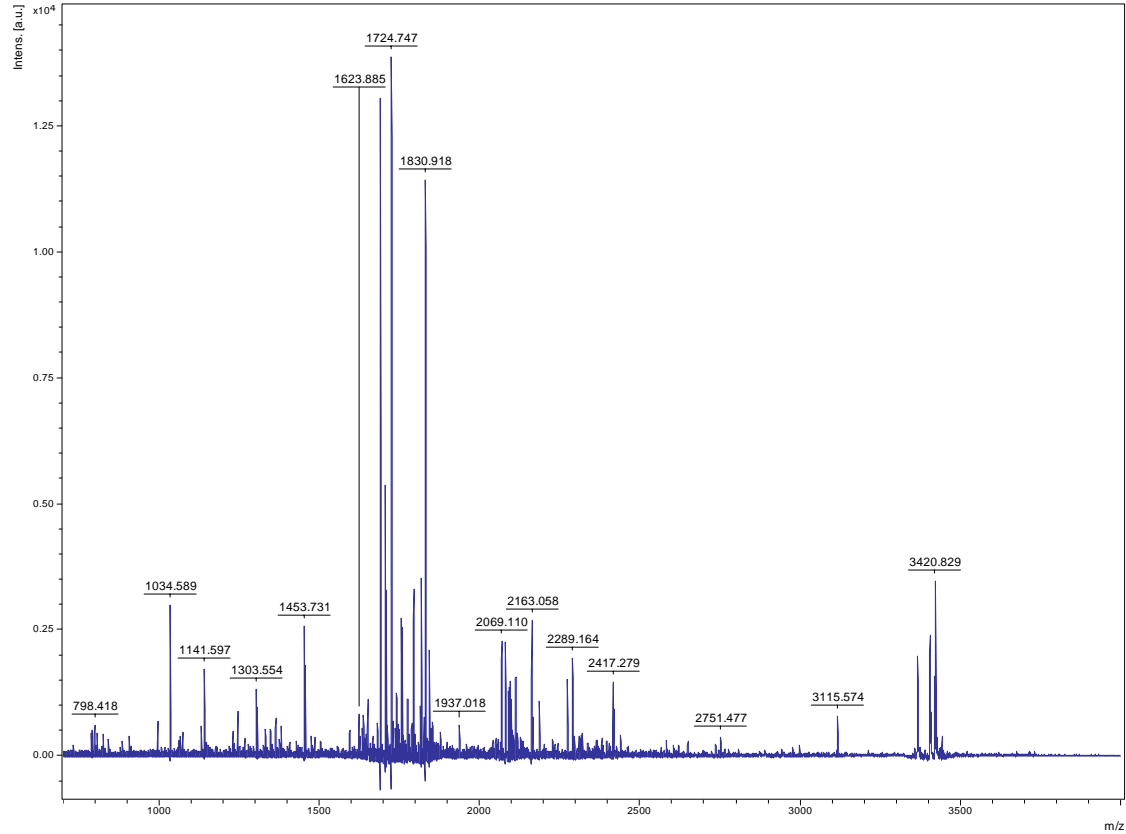

Match to: gi|50941315 Score: 83 Expect: 0.00036

## Matched peptides:

| Start - End | Observed  | Mr (expt) | Mr (calc) | Delta   | Miss Sequence                         |                                    |
|-------------|-----------|-----------|-----------|---------|---------------------------------------|------------------------------------|
| 2 - 34      | 3404.5669 | 3403.5596 | 3403.5655 | -0.0059 | 0 M.GSTAADMAAADEEACMYALQLASSILPMTLK.N | Carbamidomethyl (C); Oxidation (M) |
| 35 - 56     | 2069.1256 | 2068.1183 | 2068.1163 | 0.0020  | 0 K.NAIELGLETLSAAVAGGGK.A             |                                    |
| 87 - 95     | 1034.4477 | 1033.4404 | 1033.5920 | -0.1516 | 0 R.LLASYNVVR.C                       |                                    |
| 139 - 148   | 1331.6117 | 1330.6044 | 1330.6631 | -0.0587 | 0 K.VLMESWYYLK.D                      |                                    |
| 139 - 148   | 1347.6334 | 1346.6261 | 1346.6580 | -0.0319 | 0 K.VLMESWYYLK.D                      | Oxidation (M)                      |
| 149 - 160   | 1245.5716 | 1244.5643 | 1244.6400 | -0.0757 | 0 K.DAVLDGGIPFNK.A                    |                                    |
| 161 - 175   | 1689.7427 | 1688.7354 | 1688.7252 | 0.0102  | 0 K.AYGMTAFEYHGTDA.R.F                |                                    |
| 161 - 175   | 1705.7362 | 1704.7289 | 1704.7202 | 0.0088  | 0 K.AYGMTAFEYHGTDA.R.F                | Oxidation (M)                      |
| 231 - 262   | 3420.6189 | 3419.6116 | 3419.6607 | -0.0491 | 0 R.GINYDLPHVISEAPPFVGHVGGDMFASVPR.G  | Oxidation (M)                      |
| 271 - 283   | 1724.7904 | 1723.7831 | 1723.7525 | 0.0306  | 0 K.WILHDWSEHCAR.L                    | Carbamidomethyl (C)                |
| 287 - 297   | 1303.5343 | 1302.5270 | 1302.5663 | -0.0392 | 0 K.NCYDALPEHGK.V                     | Carbamidomethyl (C)                |
| 287 - 314   | 3115.4101 | 3114.4028 | 3114.4749 | -0.0721 | 1 K.NCYDALPEHGKVVVVECVLPESSDATAR.E    | 2 Carbamidomethyl (C)              |
| 298 - 314   | 1773.8005 | 1772.7932 | 1772.8978 | -0.1046 | 0 K.VVVVECVLPESSDATAR.E               |                                    |
| 298 - 314   | 1815.8950 | 1814.8877 | 1814.9083 | -0.0206 | 0 K.VVVVECVLPESSDATAR.E               | Acetyl (N-term)                    |
| 298 - 314   | 1830.9491 | 1829.9418 | 1829.9192 | 0.0226  | 0 K.VVVVECVLPESSDATAR.E               | Carbamidomethyl (C)                |
| 315 - 333   | 2080.0409 | 2079.0336 | 2079.0029 | 0.0307  | 0 R.EQGVFHVDMIMLAHNPGGK.E             |                                    |
| 315 - 333   | 2096.0041 | 2094.9968 | 2094.9978 | -0.0010 | 0 R.EQGVFHVDMIMLAHNPGGK.E             | Oxidation (M)                      |
| 315 - 333   | 2112.0246 | 2111.0173 | 2110.9928 | 0.0246  | 0 R.EQGVFHVDMIMLAHNPGGK.E             | 2 Oxidation (M)                    |
| 315 - 335   | 2365.1686 | 2364.1613 | 2364.1466 | 0.0147  | 1 R.EQGVFHVDMIMLAHNPGGKER.Y           |                                    |
| 315 - 335   | 2439.2253 | 2438.2180 | 2438.1470 | 0.0710  | 1 R.EQGVFHVDMIMLAHNPGGKER.Y           | Acetyl (N-term); 2 Oxidation (M)   |



# Spot 1948

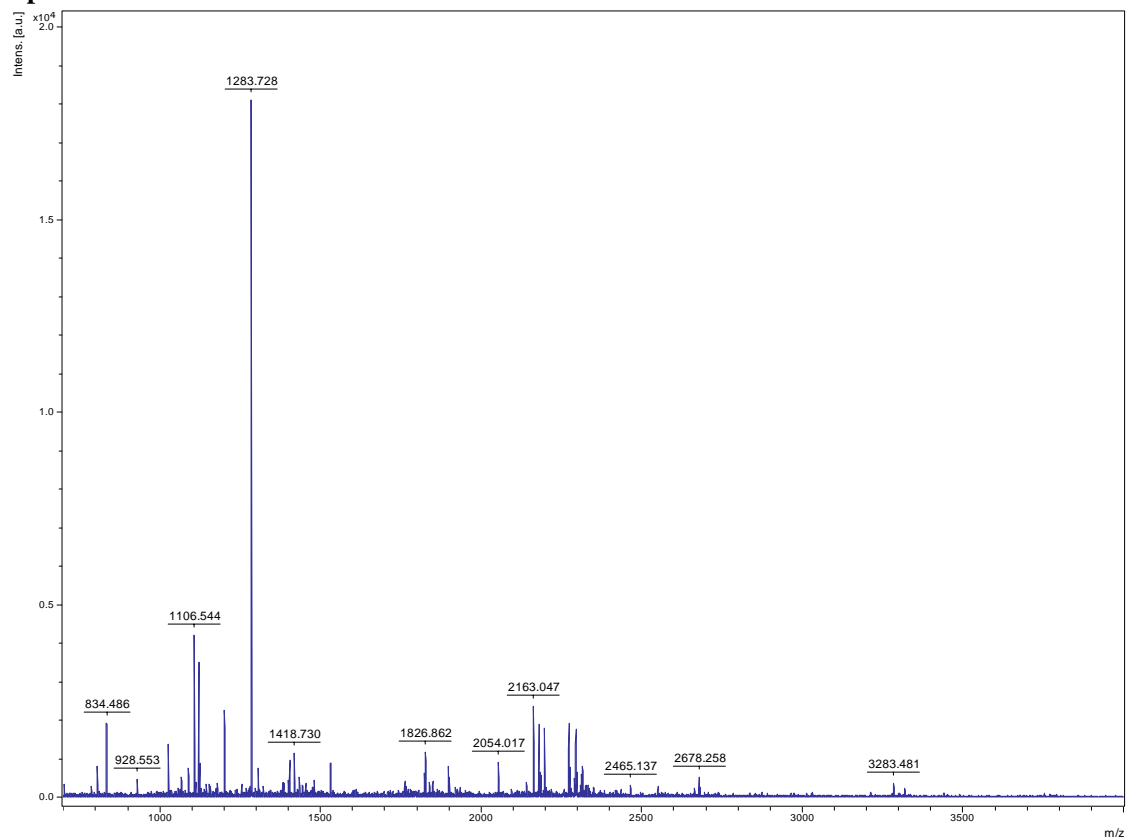

Match to: gi|108885236 Score: 170 Expect: 1.3e-12

| Start - End | Observed  | Mr (expt) | Mr (calc) | ppm | Miss Sequence                                            |
|-------------|-----------|-----------|-----------|-----|----------------------------------------------------------|
| 18 - 37     | 2295.1836 | 2294.1763 | 2294.1477 | 12  | 0 K.EHAMDRPEAIQSYK PANK.L                                |
| 18 - 37     | 2311.1554 | 2310.1481 | 2310.1426 | 2   | 0 K.EHAMDRPEAIQSYK PANK.L Oxidation (M)                  |
| 40 - 54     | 1444.7782 | 1443.7709 | 1443.7682 | 2   | 1 K.DKVAIVTGGDSGIGR.A                                    |
| 42 - 54     | 1201.6617 | 1200.6544 | 1200.6463 | 7   | 0 K.VAIVTGGDSGIGR.A                                      |
| 74 - 85     | 1404.6630 | 1403.6557 | 1403.6528 | 2   | 1 K.QGEEKDAEETLR.A                                       |
| 94 - 113    | 2179.9760 | 2178.9688 | 2178.9674 | 1   | 1 R.TGAKDPMaipADLGYDDNCR.K                               |
| 94 - 113    | 2195.9714 | 2194.9642 | 2194.9623 | 1   | 1 R.TGAKDPMaipADLGYDDNCR.K Oxidation (M)                 |
| 98 - 113    | 1822.7679 | 1821.7606 | 1821.7662 | -3  | 0 K.DPMaipADLGYDDNCR.K                                   |
| 157 - 167   | 1384.7369 | 1383.7296 | 1383.6533 | 55  | 0 R.TNIFSYFFMSK.H                                        |
| 157 - 167   | 1400.6604 | 1399.6531 | 1399.6482 | 3   | 0 R.TNIFSYFFMSK.H Oxidation (M)                          |
| 177 - 197   | 2054.0170 | 2053.0097 | 2053.0011 | 4   | 1 R.RGGAGAGGCSHINTSSINAYK.G                              |
| 178 - 197   | 1897.9043 | 1896.8970 | 1896.9000 | -2  | 0 R.RGGAGAGGCSHINTSSINAYK.G                              |
| 201 - 209   | 1025.5511 | 1024.5438 | 1024.5441 | -0  | 0 K.TLLDYATK.G                                           |
| 210 - 217   | 834.4861  | 833.4789  | 833.4759  | 4   | 0 K.GAIVAFTRA                                            |
| 218 - 229   | 1283.7278 | 1282.7206 | 1282.7245 | -3  | 0 R.ALALQLAEEGIR.V                                       |
| 230 - 251   | 2293.1960 | 2292.1887 | 2292.2154 | -12 | 0 R.VNGVAPGPIWTLIPASFAEEK.V                              |
| 254 - 263   | 1089.5242 | 1088.5169 | 1088.5073 | 9   | 0 R.QFGSQVPMGR.A Gln->pyro-Glu (N-term Q)                |
| 254 - 263   | 1105.5208 | 1104.5135 | 1104.5023 | 10  | 0 R.QFGSQVPMGR.A Gln->pyro-Glu (N-term Q); Oxidation (M) |
| 254 - 263   | 1106.5439 | 1105.5367 | 1105.5339 | 3   | 0 R.QFGSQVPMGR.A                                         |
| 254 - 263   | 1122.5358 | 1121.5285 | 1121.5288 | -0  | 0 R.QFGSQVPMGR.A Oxidation (M)                           |

## Spot 1953

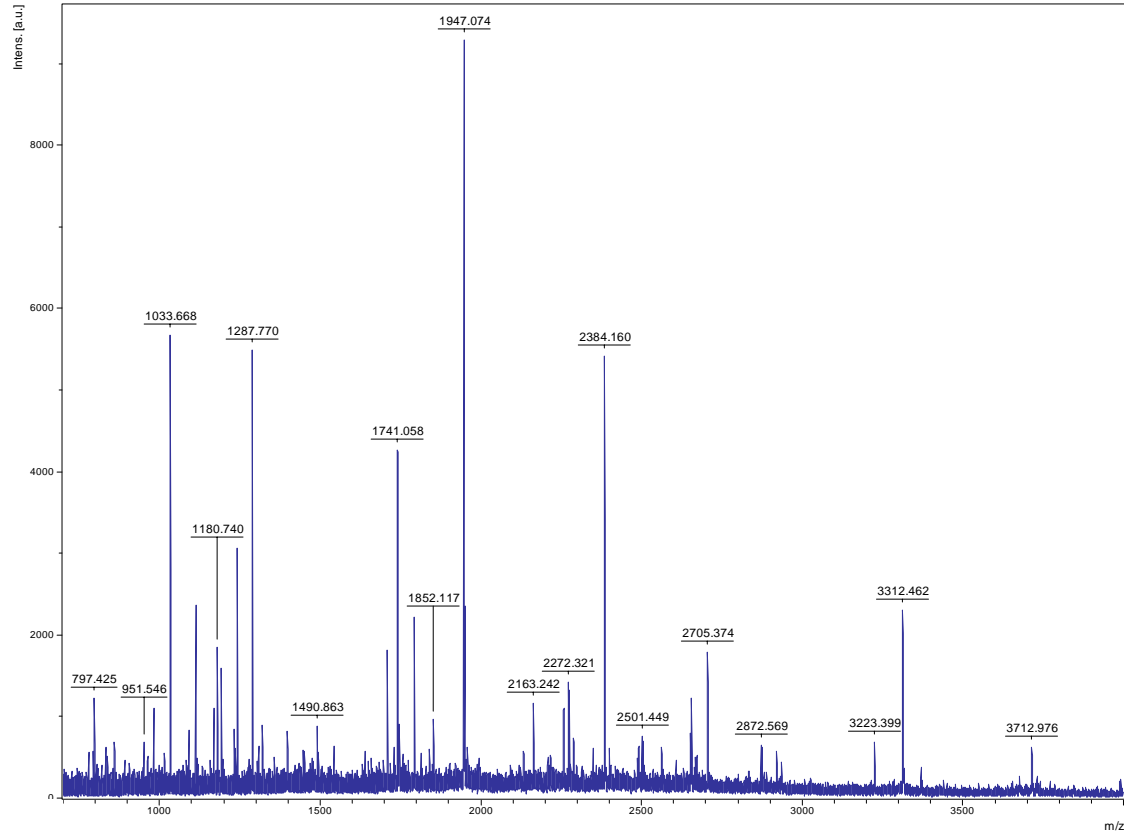

Match to: gi|51965068 Score: 93 Expect: 3.3e-05

### Matched peptides:

| Start - End | Observed  | Mr (expt) | Mr (calc) | Delta   | Miss Sequence                      |                                    |
|-------------|-----------|-----------|-----------|---------|------------------------------------|------------------------------------|
| 7 - 35      | 2872.4136 | 2871.4063 | 2871.4071 | -0.0008 | 1 K.GAEAAAAVAGAGEEENMAAWLVAKNTLKI  | Acetyl (N-term); Oxidation (M)     |
| 41 - 50     | 1112.5586 | 1111.5513 | 1111.6026 | -0.0512 | 0 K.LPPVGPYDVRV                    |                                    |
| 78 - 105    | 2918.4428 | 2917.4355 | 2917.4061 | 0.0294  | 0 K.EPMVIGHECAGVIEEVGSGVTHLAVGDR.V | Carbamidomethyl (C)                |
| 106 - 116   | 1287.6223 | 1286.6150 | 1286.6441 | -0.0291 | 0 R.VALEPGISCWR.C                  | Carbamidomethyl (C)                |
| 133 - 156   | 2652.3518 | 2651.3445 | 2651.3318 | 0.0127  | 0 K.FFATPPVHGSLANQIVHPGDLCK.L      | Carbamidomethyl (C)                |
| 182 - 207   | 2491.4632 | 2490.4559 | 2490.3879 | 0.0681  | 0 R.ADVGPETGVLMGAGPIGLVTLAAR.A     |                                    |
| 214 - 223   | 1180.5802 | 1179.5729 | 1179.6247 | -0.0518 | 0 R.VVIVDVDEHRL                    |                                    |
| 286 - 306   | 2256.1983 | 2255.1910 | 2255.1224 | 0.0686  | 0 K.VCLVGMGHNEMTVPLTSAAIR.E        | Carbamidomethyl (C)                |
| 286 - 306   | 2272.1284 | 2271.1211 | 2271.1173 | 0.0038  | 0 K.VCLVGMGHNEMTVPLTSAAIR.E        | Carbamidomethyl (C); Oxidation (M) |
| 332 - 341   | 1191.6895 | 1190.6822 | 1190.7135 | -0.0313 | 0 K.IDVKPLITHR.F                   |                                    |
| 342 - 358   | 1946.9219 | 1945.9146 | 1945.8693 | 0.0453  | 0 R.FGFSQEDVEEAPEVSAR.G            |                                    |

# Spot 1956

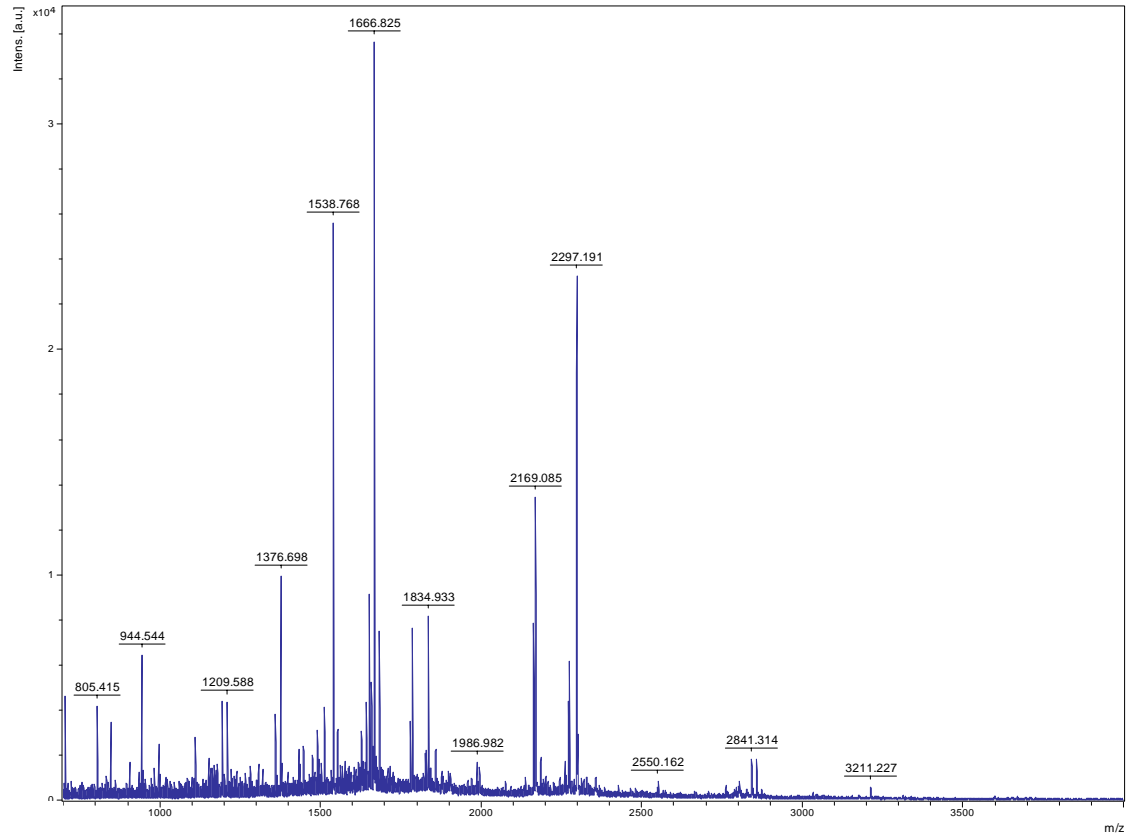

Match to: gi|50921411 Score: 125 Expect: 2.1e-08

## Matched peptides:

| Start - End | Observed  | Mr (expt) | Mr (calc) | Delta   | Miss Sequence                                           |
|-------------|-----------|-----------|-----------|---------|---------------------------------------------------------|
| 63 - 89     | 2841.2914 | 2840.2841 | 2840.4126 | -0.1285 | 1 K.AAPAAAHSVTRREEALELYEDMVLGR.I                        |
| 63 - 89     | 2857.2953 | 2856.2880 | 2856.4075 | -0.1195 | 1 K.AAPAAAHSVTRREEALELYEDMVLGR.I Oxidation (M)          |
| 76 - 89     | 1666.8141 | 1665.8068 | 1665.7919 | 0.0149  | 0 R.EEALELYEDMVLGR.I                                    |
| 76 - 89     | 1682.8340 | 1681.8267 | 1681.7868 | 0.0399  | 0 R.EEALELYEDMVLGR.I Oxidation (M)                      |
| 90 - 101    | 1626.6635 | 1625.6562 | 1625.6676 | -0.0114 | 0 R.IFEDMCAQMYR.G Carbamidomethyl (C)                   |
| 90 - 101    | 1642.6735 | 1641.6662 | 1641.6625 | 0.0037  | 0 R.IFEDMCAQMYR.G Carbamidomethyl (C); Oxidation (M)    |
| 90 - 101    | 1658.6846 | 1657.6773 | 1657.6575 | 0.0199  | 0 R.IFEDMCAQMYR.G Carbamidomethyl (C); 2 Oxidation (M)  |
| 90 - 103    | 1827.8682 | 1826.8609 | 1826.7789 | 0.0820  | 1 R.IFEDMCAQMYR.GK.M Carbamidomethyl (C); Oxidation (M) |
| 104 - 123   | 2245.0410 | 2244.0337 | 2244.1037 | -0.0699 | 0 K.MFGFVHLYNGQEAIVSTGFIK.L                             |
| 104 - 123   | 2261.0879 | 2260.0806 | 2260.0986 | -0.0179 | 0 K.MFGFVHLYNGQEAIVSTGFIK.L Oxidation (M)               |
| 124 - 136   | 1481.7118 | 1480.7045 | 1480.7344 | -0.0299 | 0 K.LLNQADCVVSTYR.D                                     |
| 124 - 136   | 1538.7543 | 1537.7470 | 1537.7558 | -0.0088 | 0 K.LLNQADCVVSTYR.D Carbamidomethyl (C)                 |
| 150 - 158   | 981.4629  | 980.4556  | 980.5000  | -0.0444 | 0 R.SVMAELFGK.A                                         |
| 150 - 158   | 997.4629  | 996.4556  | 996.4950  | -0.0393 | 0 R.SVMAELFGK.A Oxidation (M)                           |
| 202 - 208   | 944.4873  | 943.4800  | 943.5239  | -0.0439 | 1 K.YRHEVLK.Q                                           |
| 264 - 273   | 1151.5589 | 1150.5516 | 1150.5870 | -0.0354 | 1 R.ATSDPEIYK.K                                         |
| 273 - 291   | 1970.9606 | 1969.9533 | 1969.9753 | -0.0220 | 1 K.KGPAFGMPGVHVDGMDVLK.V Oxidation (M)                 |
| 274 - 291   | 1842.8856 | 1841.8783 | 1841.8803 | -0.0020 | 0 K.GPAFGMPGVHVDGMDVLK.V Oxidation (M)                  |
| 274 - 291   | 1858.8793 | 1857.8720 | 1857.8753 | -0.0032 | 0 K.GPAFGMPGVHVDGMDVLK.V 2 Oxidation (M)                |
| 306 - 318   | 1510.6856 | 1509.6783 | 1509.6769 | 0.0014  | 0 R.GEGPTLVCEYR.F Carbamidomethyl (C)                   |
| 321 - 331   | 1209.5773 | 1208.5700 | 1208.5785 | -0.0085 | 0 R.GHSLADPDEL.R                                        |
| 321 - 336   | 1834.9041 | 1833.8968 | 1833.8969 | -0.0001 | 1 R.GHSLADPDELRRPDEK.S                                  |
| 350 - 364   | 1778.9764 | 1777.9691 | 1777.9461 | 0.0230  | 1 K.KYIEQNLAISELK.S                                     |
| 351 - 364   | 1650.8472 | 1649.8399 | 1649.8512 | -0.0112 | 0 K.YYIEQNLAISELK.S                                     |
| 370 - 389   | 2169.0450 | 2168.0377 | 2168.0637 | -0.0259 | 0 K.IDDVVEEAVFADASPLPR.S                                |
| 390 - 401   | 1376.6844 | 1375.6771 | 1375.6983 | -0.0212 | 0 R.SQLLENVSDPK.G                                       |
| 402 - 410   | 847.3635  | 846.3562  | 846.4235  | -0.0673 | 0 K.GFGIGPDGK.Y                                         |
| 411 - 425   | 1784.8298 | 1783.8225 | 1783.8199 | 0.0026  | 1 K.YRCEPLFTQGTAV.- Carbamidomethyl (C)                 |

## Spot 1962

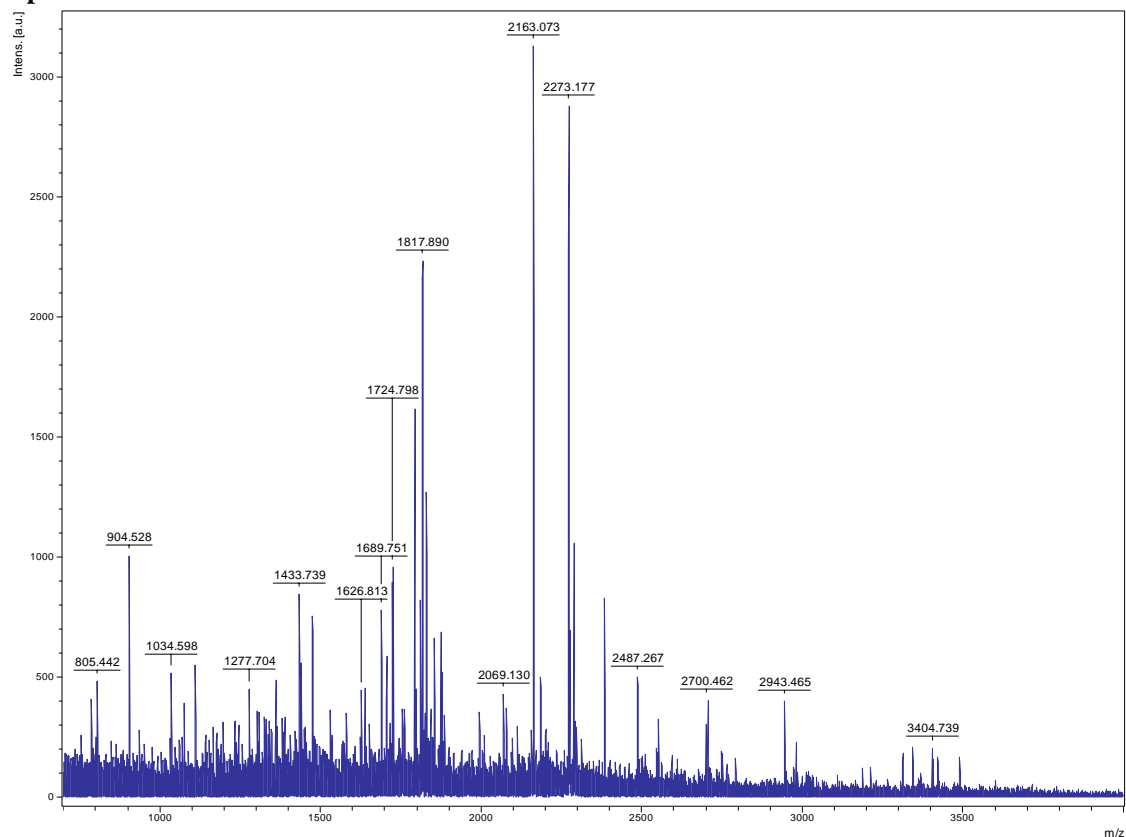

Match to: Q19BJ6\_ORYSA Score: 103 Expect: 3.3e-06

### Matched peptides:

| Start - End | Observed  | Mr (expt) | Mr (calc) | Delta   | Miss Sequence                                       |
|-------------|-----------|-----------|-----------|---------|-----------------------------------------------------|
| 35 - 56     | 2069.1252 | 2068.1179 | 2068.1163 | 0.0016  | 0 K.NAIELGLETLSAAVAGGGK.A                           |
| 57 - 72     | 1623.8887 | 1622.8814 | 1622.9243 | -0.0428 | 1 K.AALLTPAEVADKLPK.A                               |
| 73 - 86     | 1530.8115 | 1529.8042 | 1529.7442 | 0.0600  | 1 K.ANPAAADMVDRMLR.L                                |
| 87 - 95     | 1034.5945 | 1033.5872 | 1033.5920 | -0.0048 | 0 R.LLASYNVVR.C                                     |
| 139 - 148   | 1331.6808 | 1330.6735 | 1330.6631 | 0.0104  | 0 K.VLMESWYYLK.D                                    |
| 139 - 148   | 1347.6758 | 1346.6685 | 1346.6580 | 0.0105  | 0 K.VLMESWYYLK.D Oxidation (M)                      |
| 149 - 160   | 1245.6565 | 1244.6492 | 1244.6400 | 0.0092  | 0 K.DAVLDGGIPFK.A                                   |
| 161 - 175   | 1689.7664 | 1688.7591 | 1688.7252 | 0.0339  | 0 K.AYGMTAFEYHGTDR.F                                |
| 161 - 175   | 1705.7751 | 1704.7678 | 1704.7202 | 0.0477  | 0 K.AYGMTAFEYHGTDR.F Oxidation (M)                  |
| 179 - 193   | 1716.8672 | 1715.8599 | 1715.9028 | -0.0429 | 1 R.VFNEGMRNHSVIITK.K                               |
| 195 - 225   | 2980.6261 | 2979.6188 | 2979.5552 | 0.0636  | 0 K.LLDLYTGFDAASTVVDVGGGVGATVAAVVSR.H               |
| 231 - 262   | 3404.7515 | 3403.7442 | 3403.6658 | 0.0784  | 0 R.GINYDLPHVISEAPPPGVEHVGGDMFASVPR.G               |
| 231 - 262   | 3420.7335 | 3419.7262 | 3419.6607 | 0.0655  | 0 R.GINYDLPHVISEAPPPGVEHVGGDMFASVPR.G Oxidation (M) |
| 271 - 283   | 1724.8022 | 1723.7949 | 1723.7525 | 0.0424  | 0 K.WILHDWSEHCAR.L Carbamidomethyl (C)              |
| 287 - 297   | 1303.6130 | 1302.6057 | 1302.5663 | 0.0395  | 0 K.NCYDALPEHGK.V Carbamidomethyl (C)               |
| 298 - 314   | 1830.9515 | 1829.9442 | 1829.9192 | 0.0250  | 0 K.VVVVECVLPESDATAR.E Carbamidomethyl (C)          |
| 315 - 333   | 2080.0374 | 2079.0301 | 2079.0029 | 0.0272  | 0 R.EQGVFHVDMIMLAHNPGGK.E                           |
| 315 - 333   | 2096.0439 | 2095.0366 | 2094.9978 | 0.0388  | 0 R.EQGVFHVDMIMLAHNPGGK.E Oxidation (M)             |
| 315 - 333   | 2112.0241 | 2111.0168 | 2110.9928 | 0.0241  | 0 R.EQGVFHVDMIMLAHNPGGK.E 2 Oxidation (M)           |
| 354 - 368   | 1761.9037 | 1760.8964 | 1760.8773 | 0.0191  | 0 K.ATYIYANAWAIEFTK.-                               |

## Spot 1967

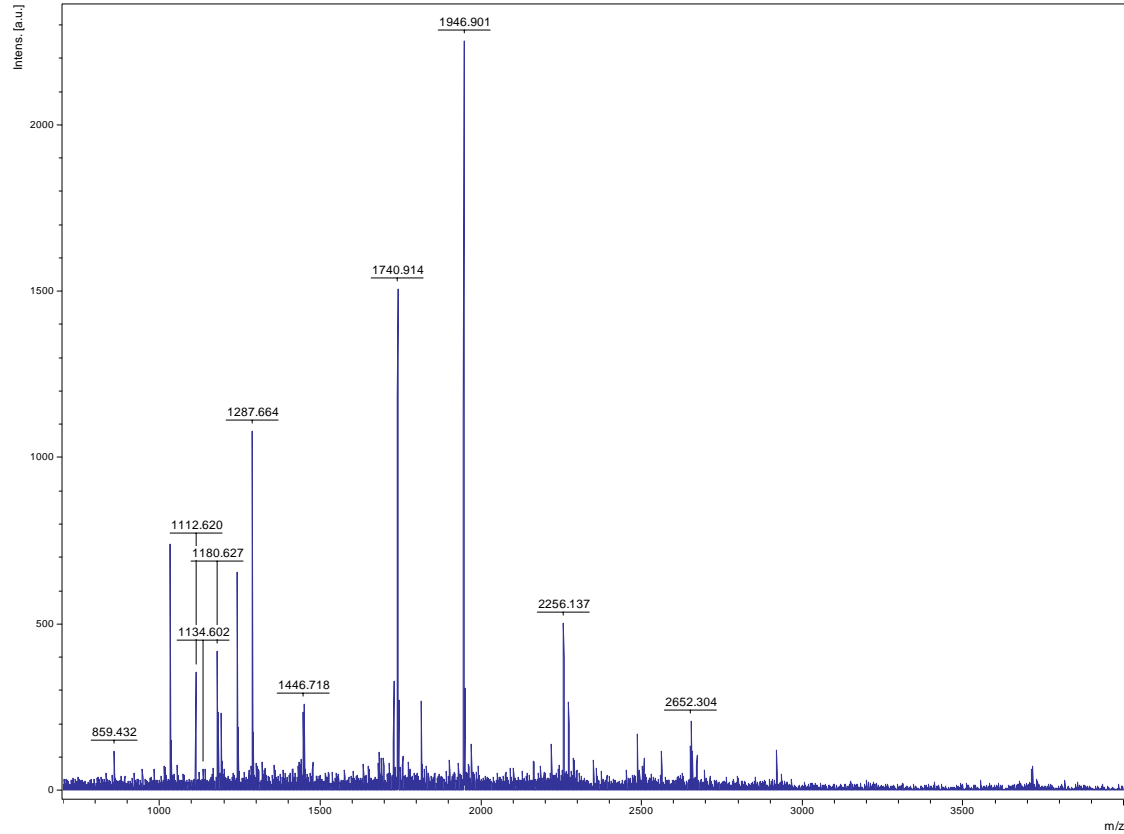

Match to: gi|51965068 Score: 204

### Matched peptides:

| Start - End | Observed  | Mr (expt) | Mr (calc) | Delta   | Miss Sequence                                                  |
|-------------|-----------|-----------|-----------|---------|----------------------------------------------------------------|
| 36 - 50     | 1728.9697 | 1727.9625 | 1727.9432 | 0.0192  | 1 K.IMPFKLPVGPYDVR.V                                           |
| 36 - 50     | 1744.9536 | 1743.9463 | 1743.9381 | 0.0082  | 1 K.IMPFKLPVGPYDVR.V Oxidation (M)                             |
| 41 - 50     | 1112.6201 | 1111.6128 | 1111.6026 | 0.0103  | 0 K.LPPVGPYDVR.V                                               |
| 55 - 67     | 1446.7179 | 1445.7106 | 1445.7085 | 0.0021  | 0 K.AVGICGSDVHYLR.E Carbamidomethyl (C)                        |
| 106 - 116   | 1287.6644 | 1286.6572 | 1286.6441 | 0.0130  | 0 R.VALEPGISQWR.C Carbamidomethyl (C)                          |
| 133 - 156   | 2652.3035 | 2651.2962 | 2651.3318 | -0.0356 | 0 K.FFATPPVHGLANQIVHPGDLCK.L Carbamidomethyl (C)               |
| 157 - 180   | 2654.2512 | 2653.2439 | 2653.2298 | -0.0142 | 0 K.LPENVSLEEGAMCEPLSVGVHACR.R 2 Carbamidomethyl (C)           |
| 214 - 223   | 1180.6270 | 1179.6197 | 1179.6247 | -0.0051 | 0 R.VVIVDVDEHRL                                                |
| 229 - 237   | 859.4323  | 858.4250  | 858.4559  | -0.0309 | 0 R.SLGADAAVR.V                                                |
| 254 - 271   | 1813.8152 | 1812.8079 | 1812.8022 | 0.0057  | 0 R.AAMGGDIDVSLDCAGFSK.T Carbamidomethyl (C)                   |
| 272 - 281   | 1032.5730 | 1031.5657 | 1031.5611 | 0.0046  | 0 K.TVATALEATR.G                                               |
| 286 - 306   | 2256.1370 | 2255.1297 | 2255.1224 | 0.0073  | 0 K.VCLVGMGHNEMTVPLTSAAIR.E Carbamidomethyl (C)                |
| 286 - 306   | 2272.1233 | 2271.1160 | 2271.1173 | -0.0013 | 0 K.VCLVGMGHNEMTVPLTSAAIR.E Carbamidomethyl (C); Oxidation (M) |
| 316 - 328   | 1740.9142 | 1739.9069 | 1739.8705 | 0.0364  | 1 R.YKDTWPLCIEFLR.S Carbamidomethyl (C)                        |
| 318 - 328   | 1449.7550 | 1448.7477 | 1448.7122 | 0.0355  | 0 K.DTWPLCIEFLR.S Carbamidomethyl (C)                          |
| 332 - 341   | 1191.7332 | 1190.7259 | 1190.7135 | 0.0124  | 0 K.IDVKPLITHR.F                                               |
| 342 - 358   | 1946.9014 | 1945.8941 | 1945.8693 | 0.0248  | 0 R.FGFSQEDVEEAPEVSAR.G                                        |

### Spot 1973

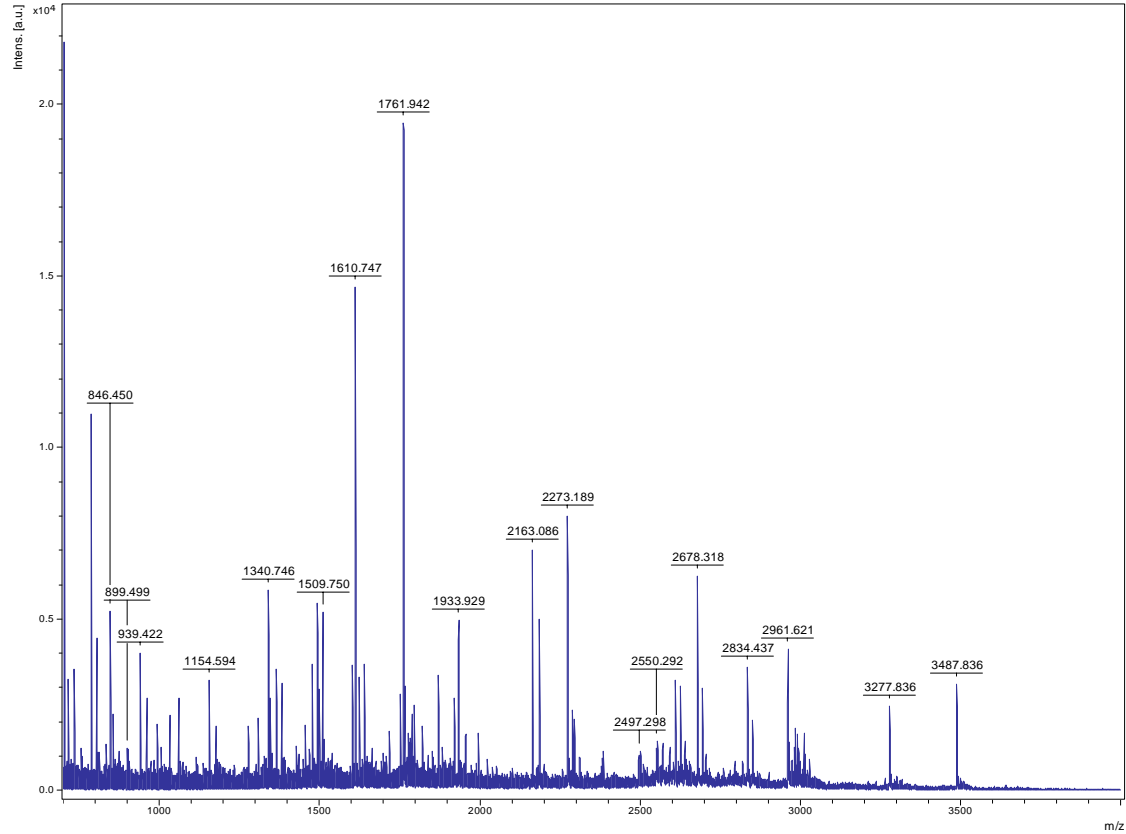

Match to: gj|121332; Score: 108

Matched peptides:

| Start - End | Observed | Mr (expt) | Mr (calc) | Delta | Miss Sequence                            |
|-------------|----------|-----------|-----------|-------|------------------------------------------|
| 19 - 34     | 1761.94  | 1760.94   | 1760.95   | -0.01 | 0 IIAEYIWWGGSGIDLR                       |
| 42 - 52     | 1154.59  | 1153.59   | 1153.63   | -0.04 | 0 GPITDVSQLPK                            |
| 53 - 83     | 3487.84  | 3486.83   | 3486.64   | 0.20  | 1 WNYDGSSTGQAPGEDSEVILYPQAIKDPFR         |
| 85 - 107    | 2678.32  | 2677.32   | 2677.23   | 0.09  | 1 GDNILVMDCYTPQGEPIPTNKR                 |
| 85 - 107    | 2694.32  | 2693.31   | 2693.22   | 0.09  | 1 GDNILVMDCYTPQGEPIPTNKR Oxidation (M)   |
| 113 - 137   | 2961.62  | 2960.62   | 2960.50   | 0.12  | 0 IFSHPDVVAEVPWYGEQEYTLQK                |
| 138 - 165   | 2990.52  | 2989.52   | 2989.39   | 0.13  | 0 DVNWPLGWVPGGFPQGPYYCAAGAEK             |
| 170 - 177   | 960.44   | 959.44    | 959.47    | -0.03 | 0 DIVDAHVK                               |
| 224 - 255   | 3277.84  | 3276.83   | 3276.68   | 0.16  | 0 VTEVAGVVLSDPKPIGDWNGAGAHTNFSTK         |
| 269 - 276   | 899.50   | 898.50    | 898.56    | -0.06 | 1 AIDKLALR                               |
| 277 - 290   | 1610.75  | 1609.74   | 1609.76   | -0.02 | 1 HKEHIAAYGEGNER                         |
| 279 - 290   | 1345.57  | 1344.57   | 1344.61   | -0.03 | 0 EHIAAYGEGNER                           |
| 333 - 355   | 2609.38  | 2608.37   | 2608.30   | 0.07  | 0 RPASNMDPYVVTGMIAETLLWK Oxidation (M)   |
| 333 - 355   | 2625.38  | 2624.38   | 2624.30   | 0.08  | 0 RPASNMDPYVVTGMIAETLLWK 2 Oxidation (M) |

# Spot 1980

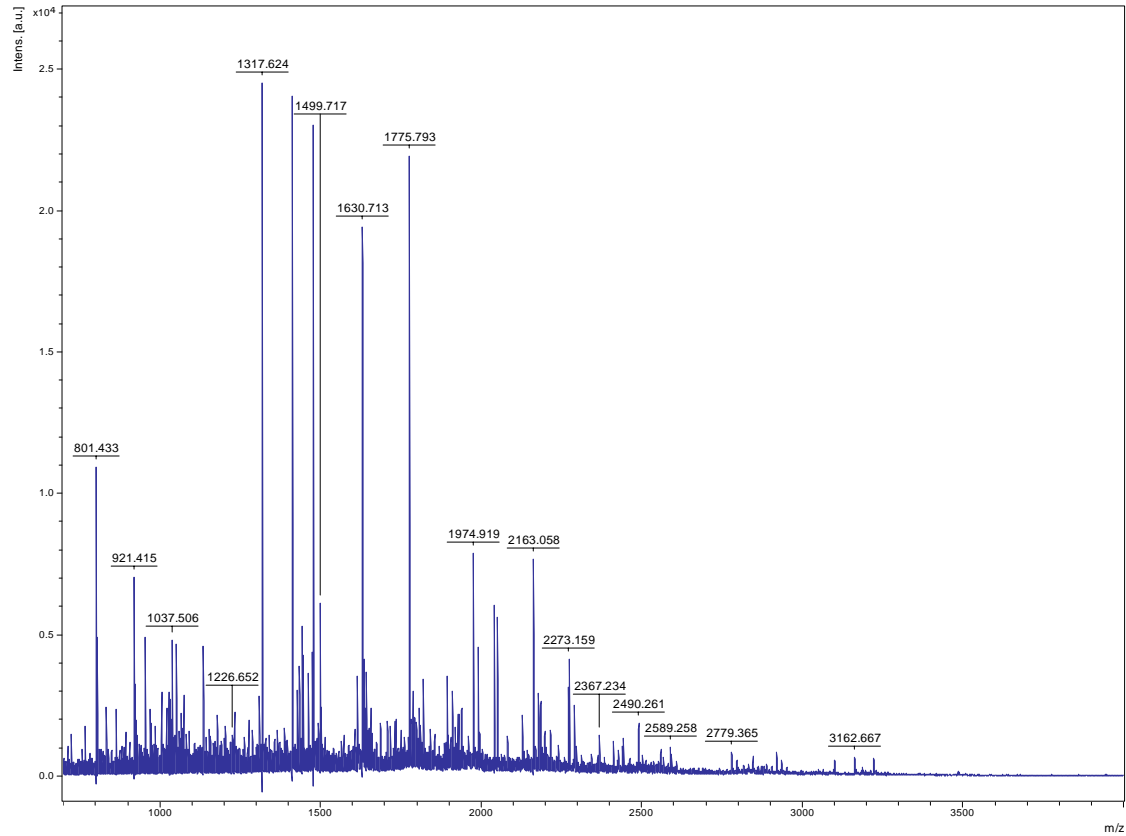

Match to: gi|38345797 Score: 192 Expect: 8.4e-15

## Matched peptides:

| Start - End | Observed  | Mr (expt) | Mr (calc) | ppm | Miss Sequence                                |
|-------------|-----------|-----------|-----------|-----|----------------------------------------------|
| 53 - 72     | 2198.1055 | 2197.0982 | 2197.1266 | -13 | 1 R.ASVAIKETPESEPPPTFLR.E                    |
| 60 - 72     | 1499.7173 | 1498.7100 | 1498.7304 | -14 | 0 K.ETPESEPPPTFLR.E                          |
| 60 - 84     | 2559.2460 | 2558.2387 | 2558.1885 | 20  | 1 K.ETPESEPPPTFLREDGSGAGSGSVR.E              |
| 85 - 92     | 1051.5274 | 1050.5201 | 1050.5280 | -8  | 1 R.ERFEAMIR.R                               |
| 85 - 92     | 1067.5257 | 1066.5185 | 1066.5229 | -4  | 1 R.ERFEAMIR.R Oxidation (M)                 |
| 87 - 92     | 766.3882  | 765.3809  | 765.3843  | -4  | 0 R.FEAMIR.R                                 |
| 93 - 111    | 1974.9195 | 1973.9122 | 1973.9225 | -5  | 1 R.RVQGEVCAALEEADGSGAR.F                    |
| 94 - 111    | 1818.8352 | 1817.8279 | 1817.8214 | 4   | 0 R.VQGEVCAALEEADGSGAR.F                     |
| 112 - 128   | 1775.7930 | 1774.7857 | 1774.8751 | -50 | 0 R.FVQGEVCAALEEADGSGAR.F                    |
| 139 - 156   | 1893.9254 | 1892.9181 | 1892.9455 | -14 | 0 K.AGVNVSVVYGVMPDAYR.A                      |
| 139 - 156   | 1909.9253 | 1908.9180 | 1908.9404 | -12 | 0 K.AGVNVSVVYGVMPDAYR.A Oxidation (M)        |
| 192 - 203   | 1476.7164 | 1475.7091 | 1475.7310 | -15 | 0 K.NPFAPTLHFNYR.Y                           |
| 204 - 211   | 970.4744  | 969.4671  | 969.4444  | 23  | 0 R.YFETDAPK.D                               |
| 204 - 218   | 1634.7602 | 1633.7529 | 1633.7736 | -13 | 1 R.YFETDAPK.DAPGAR.Q                        |
| 219 - 239   | 2441.1922 | 2440.1849 | 2440.1587 | 11  | 0 R.QVWFVGGGDTLTPSYHIEDVK.H                  |
| 247 - 259   | 1613.6878 | 1612.6805 | 1612.6980 | -11 | 1 K.QACDKFDPSPYPR.F Gln->pyro-Glu (N-term Q) |
| 247 - 259   | 1630.7131 | 1629.7059 | 1629.7246 | -11 | 1 K.QACDKFDPSPYPR.F                          |
| 252 - 259   | 1028.4945 | 1027.4872 | 1027.4763 | 11  | 0 K.FDPSFYPR.F                               |
| 263 - 271   | 1309.5686 | 1308.5614 | 1308.5485 | 10  | 0 K.WCDDYFYIK.H                              |
| 328 - 333   | 801.4329  | 800.4256  | 800.4293  | -5  | 0 K.AWQQLR.R                                 |
| 337 - 346   | 1317.6237 | 1316.6164 | 1316.6401 | -18 | 0 R.YVEFNLYDR.G                              |
| 347 - 353   | 723.4015  | 722.3943  | 722.3963  | -3  | 0 R.GTTFGLK.T                                |
| 358 - 370   | 1411.8206 | 1410.8134 | 1410.8446 | -22 | 0 R.IESILVSLPLTAR.W                          |

## Spot 1981

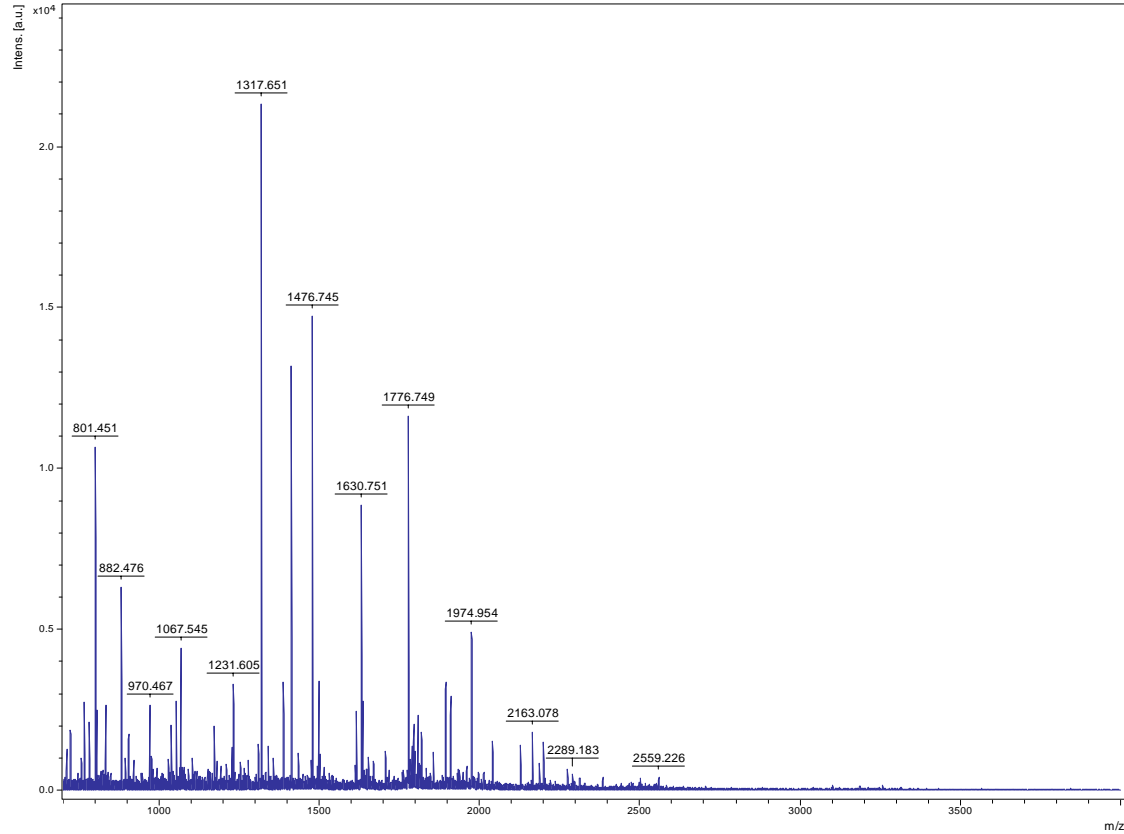

Match to: gi|38345797; Score: 257

### Matched peptides:

| Start - End | Observed | Mr (expt) | Mr (calc) | Delta | Miss Sequence                       |
|-------------|----------|-----------|-----------|-------|-------------------------------------|
| 53 - 72     | 2198.16  | 2197.16   | 2197.13   | 0.03  | 1 ASVAIEKETPESEPPPTFLR              |
| 60 - 72     | 1499.76  | 1498.75   | 1498.73   | 0.02  | 0 ETPSEPPPTFLR                      |
| 60 - 84     | 2559.23  | 2558.22   | 2558.19   | 0.04  | 1 ETPSEPPPTFLREDGSGAGSGSVR          |
| 73 - 84     | 1078.49  | 1077.49   | 1077.47   | 0.02  | 0 EDGSGAGSGSVR                      |
| 85 - 92     | 1051.55  | 1050.55   | 1050.53   | 0.02  | 1 ERFEAMIR                          |
| 85 - 92     | 1067.55  | 1066.54   | 1066.52   | 0.02  | 1 ERFEAMIR Oxidation (M)            |
| 93 - 111    | 1974.95  | 1973.95   | 1973.92   | 0.03  | 1 RVQGEVCAALEEADGSGAR               |
| 94 - 111    | 1818.86  | 1817.86   | 1817.82   | 0.04  | 0 VQGEVCAALEEADGSGAR                |
| 112 - 128   | 1775.81  | 1774.81   | 1774.87   | -0.06 | 0 FVEDVWSRPGGGGISR                  |
| 139 - 156   | 1893.98  | 1892.98   | 1892.95   | 0.04  | 0 AGVNVSVVYGVMPDAYR                 |
| 139 - 156   | 1909.98  | 1908.97   | 1908.94   | 0.03  | 0 AGVNVSVVYGVMPDAYR Oxidation (M)   |
| 174 - 191   | 1795.00  | 1794.00   | 1793.98   | 0.01  | 0 AGVPFFAAGISSVLHPK                 |
| 192 - 203   | 1476.75  | 1475.74   | 1475.73   | 0.01  | 0 NPFAPTLHFNYR                      |
| 204 - 211   | 970.47   | 969.46    | 969.44    | 0.02  | 0 YFETDAPK                          |
| 204 - 218   | 1634.79  | 1633.79   | 1633.77   | 0.02  | 1 YFETDAPKDAPGAPR                   |
| 240 - 246   | 882.48   | 881.47    | 881.45    | 0.02  | 0 HFHSVQK                           |
| 247 - 259   | 1613.72  | 1612.72   | 1612.70   | 0.02  | 1 QACDKFDPSFYPR Pyro-glu (N-term Q) |
| 247 - 259   | 1630.75  | 1629.75   | 1629.72   | 0.02  | 1 QACDKFDPSFYPR                     |
| 252 - 259   | 1028.48  | 1027.48   | 1027.48   | 0.00  | 0 FDPSTFYPR                         |
| 263 - 271   | 1309.59  | 1308.58   | 1308.55   | 0.04  | 0 WCDDYFYIK                         |
| 318 - 327   | 1231.60  | 1230.60   | 1230.59   | 0.01  | 1 KDTPFTEEK                         |
| 319 - 327   | 1103.52  | 1102.52   | 1102.49   | 0.02  | 0 DTPFTEEK                          |
| 328 - 333   | 801.45   | 800.45    | 800.43    | 0.02  | 0 AWQQLR                            |
| 337 - 346   | 1317.65  | 1316.65   | 1316.64   | 0.01  | 0 YVEFNLVYDR                        |
| 354 - 370   | 1783.05  | 1782.05   | 1782.04   | 0.01  | 1 TGGRIESILVSLPLTAR                 |
| 358 - 370   | 1411.86  | 1410.86   | 1410.84   | 0.01  | 0 IESILVSLPLTAR                     |
| 371 - 384   | 1776.75  | 1775.75   | 1775.74   | 0.01  | 0 WQYDHTPEEGTEER                    |
| 385 - 394   | 1171.66  | 1170.65   | 1170.64   | 0.01  | 1 KLLDACINPK                        |



## Spot 1989

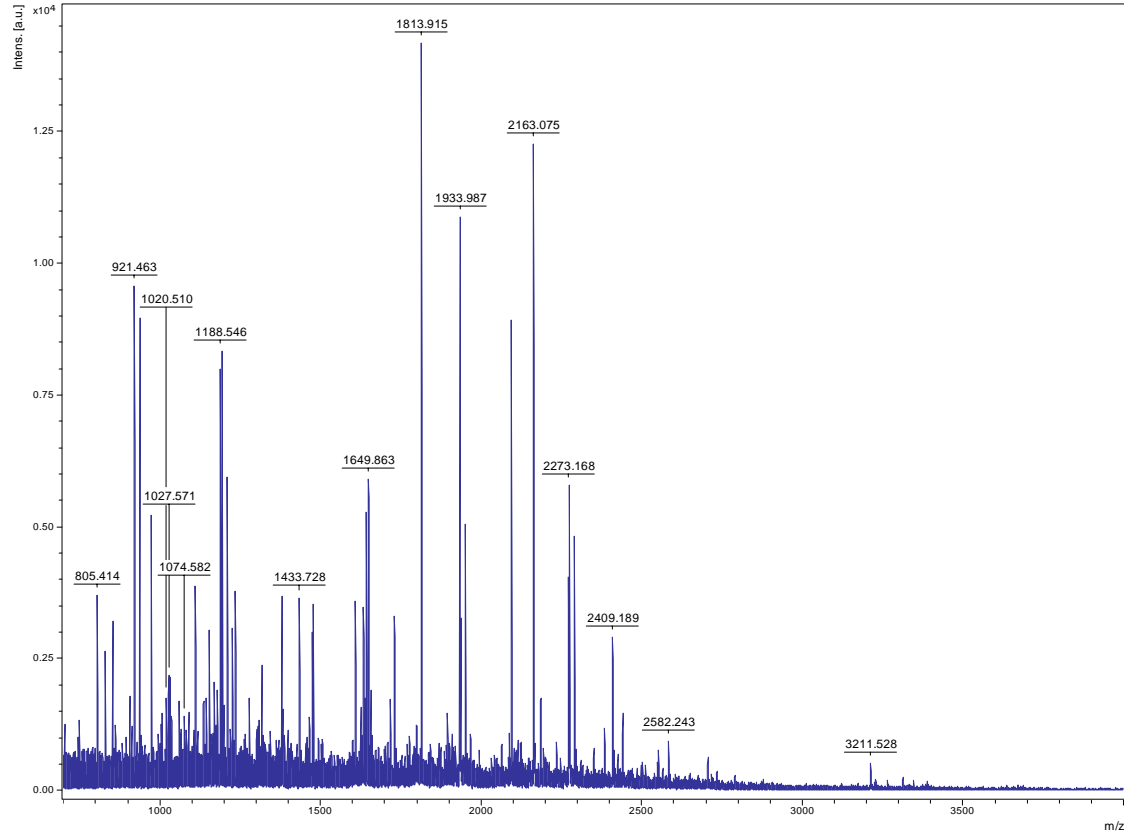

Match to: gi|27804772; Score: 187

### Matched peptides:

| Start - End | Observed | Mr (expt) | Mr (calc) | Delta | Miss Sequence                        |
|-------------|----------|-----------|-----------|-------|--------------------------------------|
| 1 - 11      | 1199.55  | 1198.55   | 1198.57   | -0.02 | 0 METVAAASYTR                        |
| 85 - 93     | 1027.57  | 1026.57   | 1026.58   | -0.01 | 1 ATPDKNLIR                          |
| 94 - 103    | 1209.58  | 1208.58   | 1208.57   | 0.01  | 0 LLICMGEAMR Oxidation (M)           |
| 94 - 103    | 1225.59  | 1224.59   | 1224.57   | 0.02  | 0 LLICMGEAMR 2 Oxidation (M)         |
| 137 - 149   | 1608.81  | 1607.81   | 1607.80   | 0.00  | 0 LLFEALEYSHVCK                      |
| 201 - 220   | 1933.99  | 1932.98   | 1932.97   | 0.01  | 0 LTGVTGGDQVAAAMGIYGPR               |
| 201 - 220   | 1949.98  | 1948.98   | 1948.97   | 0.01  | 0 LTGVTGGDQVAAAMGIYGPR Oxidation (M) |
| 221 - 228   | 922.56   | 921.56    | 921.55    | 0.00  | 0 TTYIALK                            |
| 229 - 243   | 1730.82  | 1729.81   | 1729.80   | 0.02  | 0 DCPGTHEFLLDEGK                     |
| 229 - 248   | 2409.19  | 2408.19   | 2408.16   | 0.03  | 1 DCPGTHEFLLDEGKWQHVK                |
| 258 - 265   | 921.46   | 920.46    | 920.45    | 0.01  | 0 MFSPGNLR                           |
| 258 - 265   | 937.45   | 936.45    | 936.45    | 0.00  | 0 MFSPGNLR Oxidation (M)             |
| 266 - 282   | 2093.04  | 2092.03   | 2092.02   | 0.02  | 1 ATFDNPEYDKLINYYVK                  |
| 276 - 282   | 912.51   | 911.51    | 911.51    | -0.00 | 0 LINYYVK                            |
| 289 - 303   | 1633.86  | 1632.86   | 1632.85   | 0.00  | 0 YTGGMVPDVNQIIVK                    |
| 289 - 303   | 1649.86  | 1648.86   | 1648.85   | 0.01  | 0 YTGGMVPDVNQIIVK Oxidation (M)      |
| 306 - 317   | 1235.66  | 1234.66   | 1234.66   | -0.00 | 0 GIFTNVTSPYAK                       |
| 345 - 358   | 1625.84  | 1624.84   | 1624.84   | -0.00 | 1 QSVLDKVINLDER Pyro-glu (N-term Q)  |
| 345 - 358   | 1642.88  | 1641.88   | 1641.87   | -0.01 | 1 QSVLDKVINLDER                      |
| 351 - 358   | 972.50   | 971.50    | 971.50    | -0.00 | 0 VINLDER                            |
| 359 - 366   | 853.43   | 852.43    | 852.43    | -0.01 | 0 TQVAYGSK                           |
| 359 - 371   | 1478.78  | 1477.78   | 1477.79   | -0.01 | 1 TQVAYGSKNEIHR                      |
| 367 - 381   | 1813.91  | 1812.91   | 1812.90   | -0.01 | 1 NEIHRFEETLYGSSR                    |
| 372 - 381   | 1188.55  | 1187.54   | 1187.55   | -0.00 | 0 FEETLYGSSR                         |

### Spot 1991

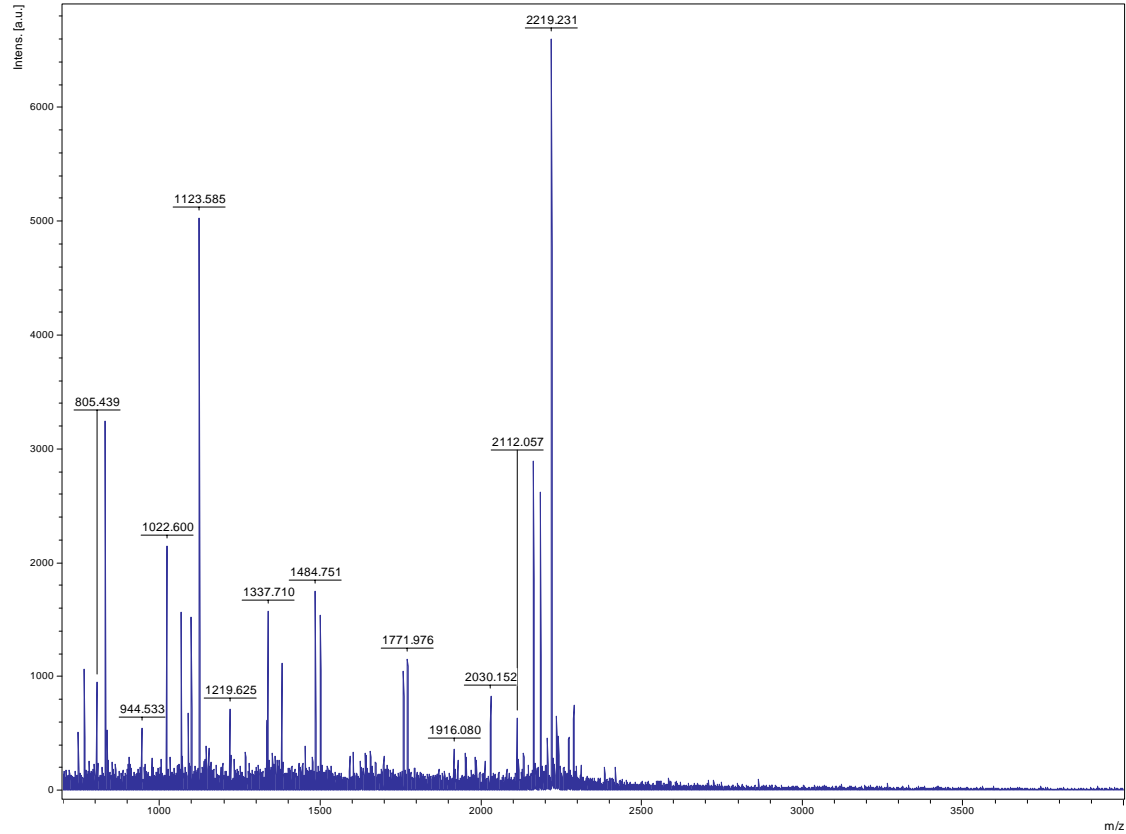

Match to: gi|4730886; Score: 98

#### Matched peptides:

| Start - End | Observed | Mr (expt) | Mr (calc) | Delta | Miss Sequence                 |
|-------------|----------|-----------|-----------|-------|-------------------------------|
| 15 - 23     | 1123.59  | 1122.58   | 1122.55   | 0.03  | 0 VLNCEYAVR                   |
| 24 - 32     | 1022.60  | 1021.60   | 1021.57   | 0.03  | 0 GEIVHAQR                    |
| 70 - 87     | 2184.11  | 2183.11   | 2183.06   | 0.05  | 1 EVIALCDHPCLLEKEETK          |
| 88 - 97     | 1066.58  | 1065.57   | 1065.55   | 0.03  | 0 SLFSADAISR                  |
| 98 - 108    | 1099.67  | 1098.66   | 1098.64   | 0.02  | 0 ATTLASIPGR                  |
| 109 - 120   | 1219.62  | 1218.62   | 1218.60   | 0.02  | 0 ATGAYSHSQGIK                |
| 124 - 133   | 944.53   | 943.53    | 943.51    | 0.02  | 0 DAIAAGIASR                  |
| 223 - 243   | 2219.23  | 2218.23   | 2218.17   | 0.06  | 0 ALVVINPGNPTGQVLAENQR        |
| 301 - 309   | 1089.51  | 1088.51   | 1088.47   | 0.04  | 1 GYYGECGKR                   |
| 310 - 323   | 1484.75  | 1483.75   | 1483.71   | 0.04  | 0 GGYMETGFSAPVR               |
| 310 - 323   | 1500.74  | 1499.74   | 1499.71   | 0.03  | 0 GGYMETGFSAPVR Oxidation (M) |

Spot 1996

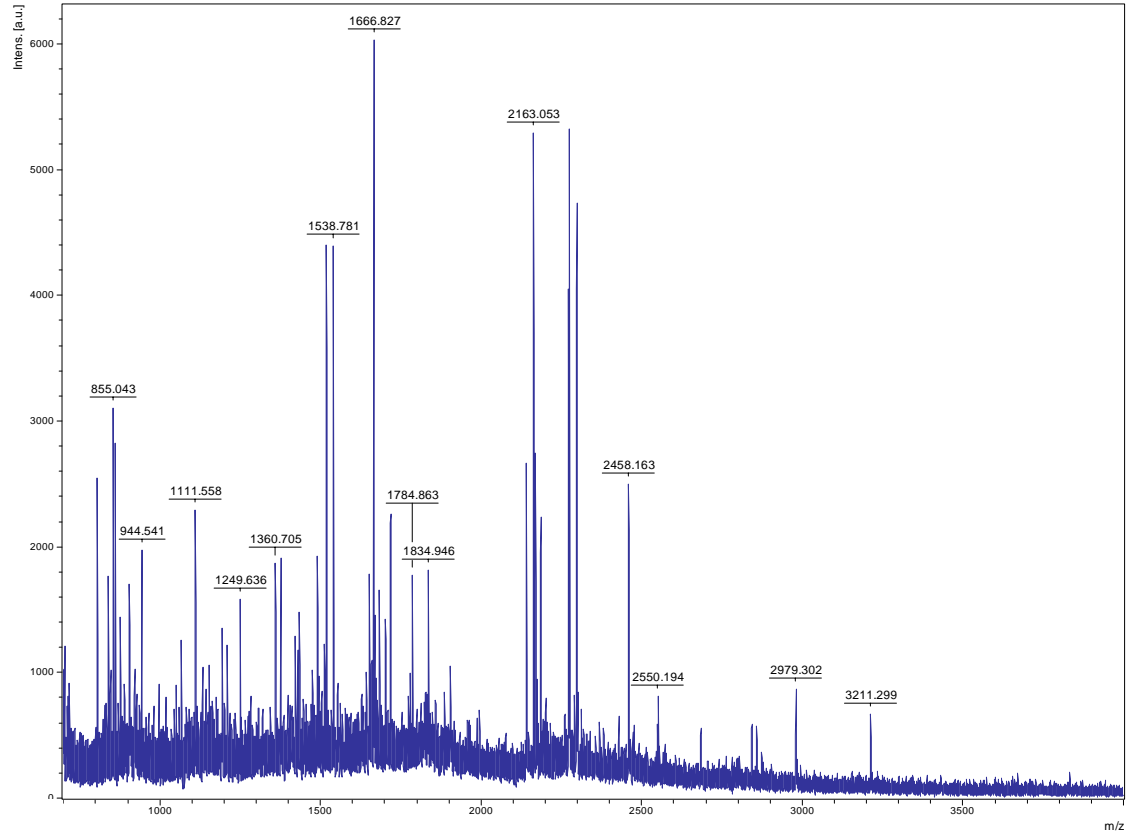

Match to: gi|50921411 Score: 99 Expect: 8.4e-06

Matched peptides:

| Start - End | Observed  | Mr (expt) | Mr (calc) | Delta   | Miss Sequence                    |                                      |
|-------------|-----------|-----------|-----------|---------|----------------------------------|--------------------------------------|
| 63 - 89     | 2857.4246 | 2856.4173 | 2856.4075 | 0.0098  | 1 K.AAPAAAHSVTTREEALELYEDMVLGR.I | Oxidation (M)                        |
| 76 - 89     | 1666.8134 | 1665.8061 | 1665.7919 | 0.0142  | 0 R.EEALELYEDMVLGR.I             |                                      |
| 76 - 89     | 1682.8318 | 1681.8245 | 1681.7868 | 0.0377  | 0 R.EEALELYEDMVLGR.I             | Oxidation (M)                        |
| 124 - 136   | 1538.7746 | 1537.7673 | 1537.7558 | 0.0115  | 0 K.LLNQADCVVSTYR.D              | Carbamidomethyl (C)                  |
| 150 - 164   | 1702.9037 | 1701.8964 | 1701.7636 | 0.1328  | 1 R.SVMAELFGKATGCCR.G            | 2 Carbamidomethyl (C); Oxidation (M) |
| 202 - 208   | 944.5153  | 943.5080  | 943.5239  | -0.0159 | 1 K.YRHEVLK.Q                    |                                      |
| 321 - 336   | 1834.9080 | 1833.9007 | 1833.8969 | 0.0038  | 1 R.GHSLADPDELRRPDEK.S           |                                      |
| 350 - 364   | 1778.9502 | 1777.9429 | 1777.9461 | -0.0032 | 1 K.KYIIEQNLATESELK.S            |                                      |
| 351 - 364   | 1650.8698 | 1649.8625 | 1649.8512 | 0.0114  | 0 K.YIIEQNLATESELK.S             |                                      |
| 370 - 389   | 2169.0633 | 2168.0560 | 2168.0637 | -0.0076 | 0 K.IIDVVEEAVEFADASPLPPR.S       |                                      |
| 390 - 401   | 1376.7029 | 1375.6956 | 1375.6983 | -0.0027 | 0 R.SQLENVFSDPK.G                |                                      |
| 411 - 425   | 1784.8584 | 1783.8511 | 1783.8199 | 0.0312  | 1 K.YRCEDPLFTQGTAV.-             | Carbamidomethyl (C)                  |

## Spot 2002

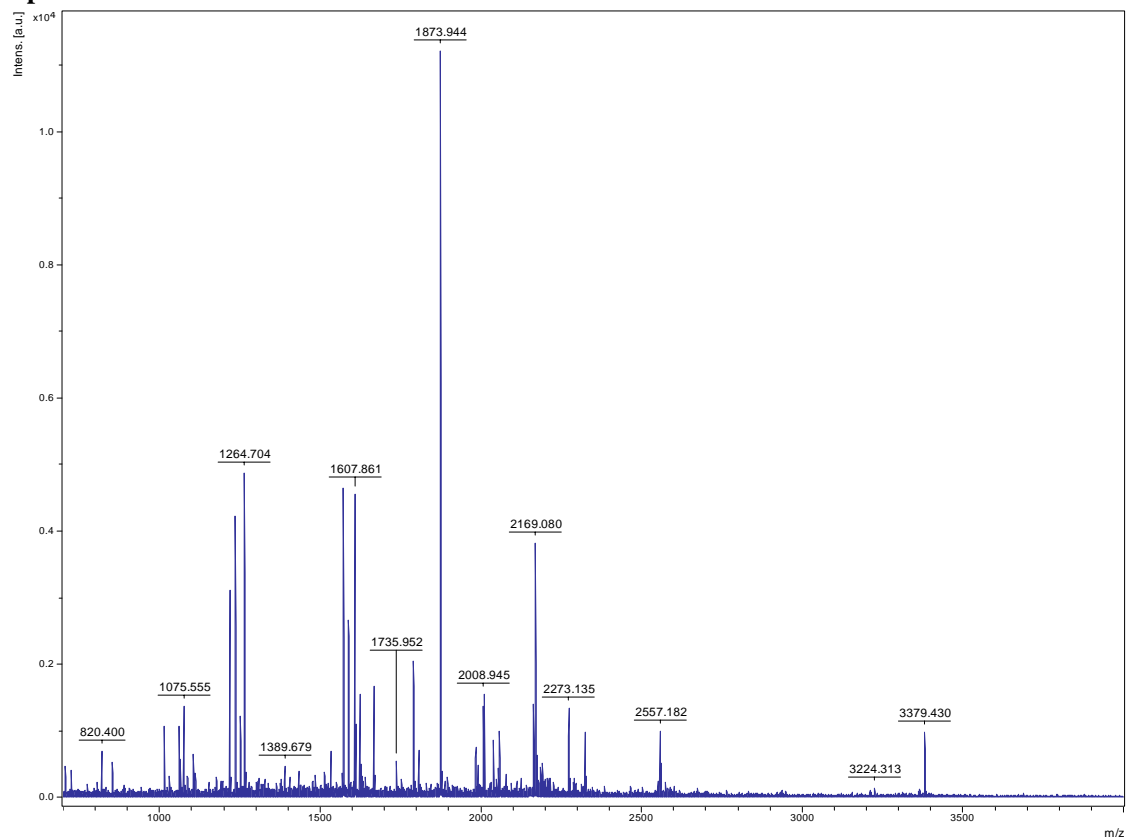

Match to: gi|54291764 Score: 142

### Matched peptides:

| Start - End | Observed  | Mr (expt) | Mr (calc) | Delta   | Miss Sequence                             |
|-------------|-----------|-----------|-----------|---------|-------------------------------------------|
| 16 - 30     | 1873.9436 | 1872.9363 | 1872.9370 | -0.0006 | 0 R.FHPTDEELVINYLQR.R                     |
| 76 - 84     | 1075.5551 | 1074.5478 | 1074.5570 | -0.0092 | 0 R.YPNSVRPSR.S                           |
| 85 - 92     | 853.4321  | 852.4248  | 852.4130  | 0.0118  | 0 R.SAASGFWK.A                            |
| 93 - 113    | 2174.0618 | 2173.0545 | 2173.0871 | -0.0326 | 0 K.ATGTDKPVQVANMQSTPVAMK.K               |
| 93 - 113    | 2190.0540 | 2189.0467 | 2189.0820 | -0.0353 | 0 K.ATGTDKPVQVANMQSTPVAMK.K Oxidation (M) |
| 114 - 128   | 1735.9515 | 1734.9443 | 1734.9490 | -0.0048 | 1 K.KALVFYVGRPPMETK.T                     |
| 115 - 128   | 1607.8611 | 1606.8538 | 1606.8541 | -0.0003 | 0 K.ALVFYVGRPPMETK.T                      |
| 115 - 128   | 1623.8507 | 1622.8434 | 1622.8490 | -0.0056 | 0 K.ALVFYVGRPPMETK.T Oxidation (M)        |
| 129 - 137   | 1236.5714 | 1235.5641 | 1235.5757 | -0.0116 | 0 K.TTWIMHEYR.L                           |
| 129 - 137   | 1252.5620 | 1251.5547 | 1251.5706 | -0.0159 | 0 K.TTWIMHEYR.L Oxidation (M)             |
| 138 - 161   | 2324.1289 | 2323.1216 | 2323.1404 | -0.0188 | 0 R.LTNTGGSTASHPSLSSTAHPSVK.L             |
| 162 - 169   | 1062.5222 | 1061.5149 | 1061.5215 | -0.0066 | 0 K.LDEWVLCCK.I Carbamidomethyl (C)       |
| 170 - 189   | 2169.0801 | 2168.0728 | 2168.0861 | -0.0133 | 1 K.IFNKSPEDNTAPPSNVVSR.L                 |
| 174 - 189   | 1666.8076 | 1665.8003 | 1665.7958 | 0.0045  | 0 K.SPEPDNTAPPSNVVSR.L                    |

Match to: gi|34897838 Score: 107

### Matched peptides:

| Start - End | Observed  | Mr (expt) | Mr (calc) | Delta   | Miss Sequence                                                 |
|-------------|-----------|-----------|-----------|---------|---------------------------------------------------------------|
| 35 - 49     | 1513.7434 | 1512.7361 | 1512.7460 | -0.0098 | 0 K.SLLDGSYAGAFDGLK.D                                         |
| 35 - 53     | 2008.9449 | 2007.9377 | 2007.9537 | -0.0160 | 1 K.SLLDGSYAGAFDGLKDHDK.S                                     |
| 134 - 145   | 1433.7052 | 1432.6979 | 1432.7860 | -0.0881 | 1 K.GLEKILDHMHK.V                                             |
| 146 - 167   | 2557.1816 | 2556.1744 | 2556.1921 | -0.0177 | 1 K.VVNDLYSATDKYTDGWLSSAHK.L                                  |
| 184 - 202   | 1984.0209 | 1983.0136 | 1983.0459 | -0.0323 | 0 K.HSSINCIVTSGSLIPSLAK.C Carbamidomethyl (C)                 |
| 208 - 225   | 2056.9702 | 2055.9629 | 2055.9789 | -0.0159 | 0 R.LDDVVAFENVYSSWEVGK.L                                      |
| 234 - 242   | 1105.5219 | 1104.5146 | 1104.5312 | -0.0166 | 1 K.ERYDGPNVR.F                                               |
| 236 - 242   | 820.4002  | 819.3929  | 819.3875  | 0.0054  | 0 R.YDGPNVR.F                                                 |
| 243 - 260   | 2037.8689 | 2036.8616 | 2036.8754 | -0.0137 | 0 R.FCAIGDGHEECTAAQIMK.W 2 Carbamidomethyl (C)                |
| 243 - 260   | 2053.8523 | 2052.8450 | 2052.8703 | -0.0253 | 0 R.FCAIGDGHEECTAAQIMK.W 2 Carbamidomethyl (C); Oxidation (M) |
| 266 - 275   | 1218.5923 | 1217.5850 | 1217.5941 | -0.0091 | 0 K.IEFHPDAPHR.F                                              |
| 276 - 286   | 1264.7037 | 1263.6965 | 1263.7088 | -0.0123 | 0 R.FPGLNLPIHR.I                                              |

## Spot 2003

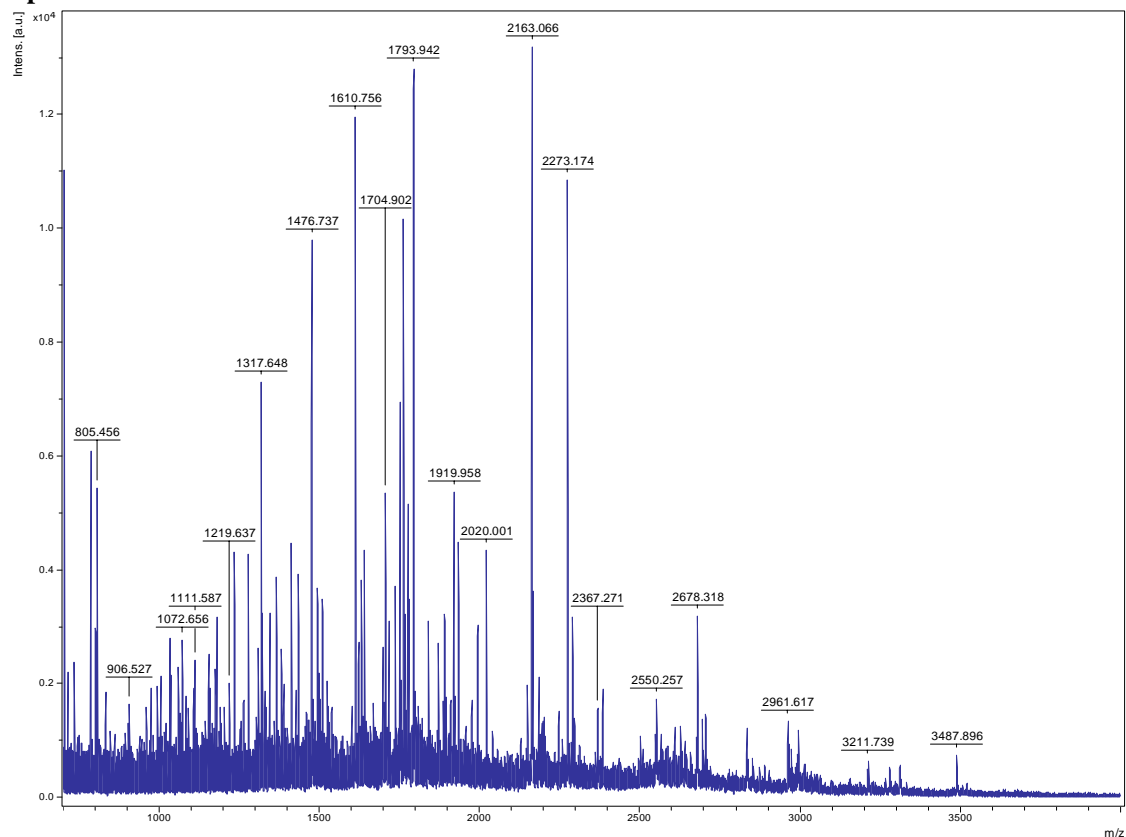

Match to: gi|38345797; Score: 78

### Matched peptides:

| Start - End | Observed | Mr (expt) | Mr (calc) | Delta | Miss Sequence          |
|-------------|----------|-----------|-----------|-------|------------------------|
| 53 - 72     | 2198.12  | 2197.12   | 2197.13   | -0.01 | 1 ASVAIEKETPESEPPPTFLR |
| 60 - 72     | 1499.75  | 1498.75   | 1498.73   | 0.02  | 0 ETPSEPPPTFLR         |
| 93 - 111    | 1974.93  | 1973.93   | 1973.92   | 0.01  | 1 RVQGEVCAALEEADGSGAR  |
| 112 - 128   | 1775.82  | 1774.81   | 1774.87   | -0.06 | 0 FVEDVWSRPGGGGGSIR    |
| 129 - 138   | 1190.72  | 1189.72   | 1189.65   | 0.07  | 1 VLQDGRVFEK           |
| 139 - 156   | 1893.94  | 1892.94   | 1892.95   | -0.01 | 0 AGVNVSVVYGVMPDAYR    |
| 192 - 203   | 1476.74  | 1475.74   | 1475.73   | 0.00  | 0 NPFAPTLHFNYR         |
| 204 - 218   | 1634.77  | 1633.77   | 1633.77   | -0.00 | 1 YFETDAPKDAPGAPR      |
| 247 - 259   | 1630.74  | 1629.74   | 1629.72   | 0.02  | 1 QACDKFDPSPFYPR       |
| 328 - 333   | 801.48   | 800.47    | 800.43    | 0.04  | 0 AWQQLR               |
| 337 - 346   | 1317.65  | 1316.65   | 1316.64   | 0.01  | 0 YVEFNLVYDR           |
| 358 - 370   | 1411.83  | 1410.83   | 1410.84   | -0.02 | 0 IESILVSLPTAR         |

Match to: gi|34902480; Score: 71

### Matched peptides:

| Start - End | Observed | Mr (expt) | Mr (calc) | Delta | Miss Sequence                            |
|-------------|----------|-----------|-----------|-------|------------------------------------------|
| 19 - 34     | 1761.94  | 1760.94   | 1760.95   | -0.00 | 0 IIAEYIIVGGSGIDLR                       |
| 42 - 52     | 1154.66  | 1153.66   | 1153.63   | 0.02  | 0 GPITDVSQLPK                            |
| 53 - 83     | 3487.90  | 3486.89   | 3486.64   | 0.26  | 1 WNYDGSSTGQAPGEDSEVILYPQAIKDFPR         |
| 85 - 107    | 2678.32  | 2677.32   | 2677.23   | 0.09  | 1 GDNILVMDCYTPQGEIPIPTNKR                |
| 85 - 107    | 2694.28  | 2693.28   | 2693.22   | 0.06  | 1 GDNILVMDCYTPQGEIPIPTNKR Oxidation (M)  |
| 113 - 137   | 2961.62  | 2960.61   | 2960.50   | 0.12  | 0 IFSHPDVVAEVPWYGIQEYTLQK                |
| 162 - 169   | 960.51   | 959.50    | 959.47    | 0.03  | 0 DIVDAHYK                               |
| 269 - 282   | 1610.76  | 1609.75   | 1609.76   | -0.01 | 1 HKEHIAAYGEGNER                         |
| 271 - 282   | 1345.63  | 1344.63   | 1344.61   | 0.02  | 0 EHIAAYGEGNER                           |
| 325 - 347   | 2625.34  | 2624.33   | 2624.30   | 0.04  | 0 RPASNMDPYVVTGMIAETLLWK 2 Oxidation (M) |

## Spot 2011

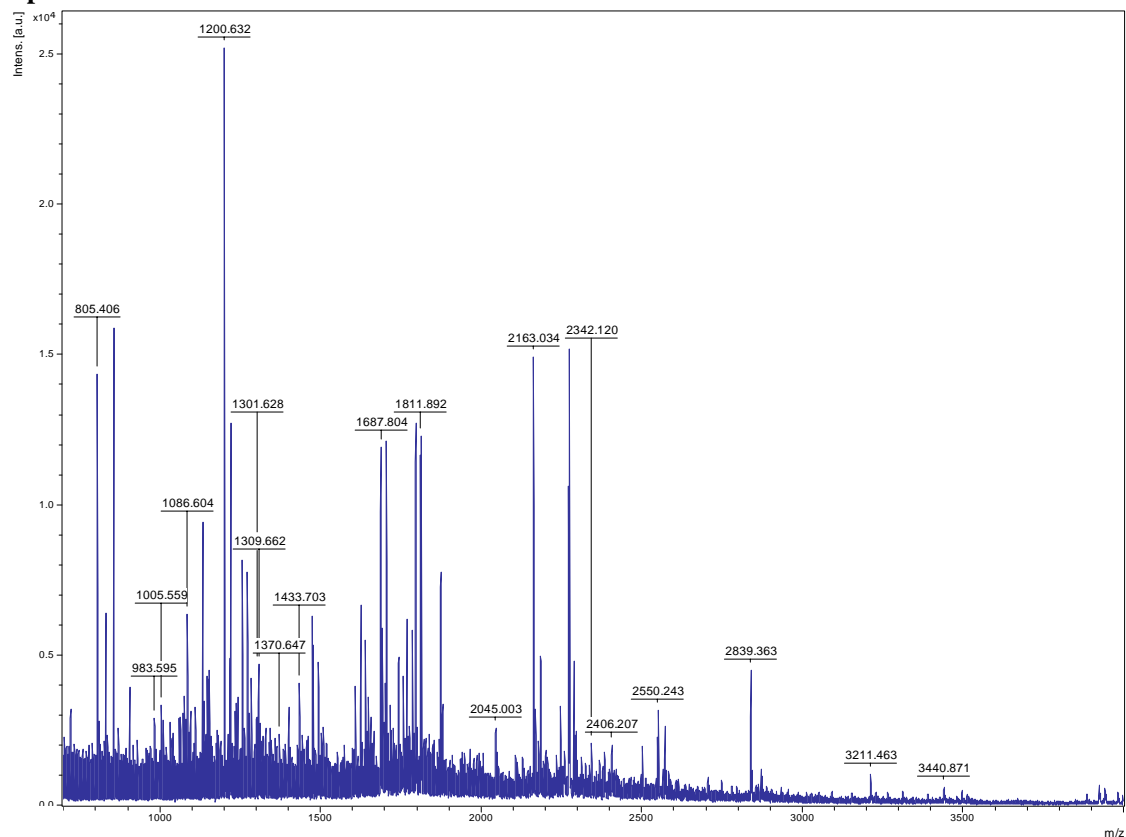

Match to: gi|50582723; Score: 100

Matched peptides:

| Start - End | Observed | Mr (expt) | Mr (calc) | Delta | Miss Sequence             |
|-------------|----------|-----------|-----------|-------|---------------------------|
| 77 - 90     | 1270.70  | 1269.70   | 1269.74   | -0.04 | 0 TVVAVILGGGAGTR          |
| 99 - 110    | 1199.64  | 1198.64   | 1198.68   | -0.04 | 0 AKPAVPIGGAYR            |
| 127 - 140   | 1625.83  | 1624.83   | 1624.86   | -0.03 | 0 VYILTQFNASLNR           |
| 175 - 184   | 1150.56  | 1149.56   | 1149.56   | 0.00  | 0 WFQGTADAVR              |
| 185 - 194   | 1284.67  | 1283.67   | 1283.58   | 0.08  | 0 QFDWLFDDAK              |
| 197 - 211   | 1743.85  | 1742.85   | 1742.88   | -0.04 | 0 DIDDVLILSGDHLRY         |
| 225 - 239   | 1691.81  | 1690.81   | 1690.77   | 0.05  | 0 GADISICCLPIDDSR         |
| 285 - 298   | 1645.79  | 1644.78   | 1644.86   | -0.08 | 0 EKPYIASMGVYIFK          |
| 300 - 307   | 983.60   | 982.59    | 982.62    | -0.02 | 0 EILLNLLR                |
| 308 - 326   | 2107.03  | 2106.03   | 2106.05   | -0.02 | 1 WRFPTANDFGSEHPASAK      |
| 347 - 361   | 1705.82  | 1704.82   | 1704.85   | -0.02 | 0 SFFEANLSLAEQPPR         |
| 376 - 387   | 1370.65  | 1369.64   | 1369.71   | -0.07 | 1 RNLPPSMINNSK            |
| 388 - 403   | 1880.85  | 1879.85   | 1879.86   | -0.01 | 0 ITDSIISHGCFLDSCR        |
| 404 - 412   | 1009.57  | 1008.56   | 1008.57   | -0.01 | 0 IEHSVVGIR               |
| 457 - 467   | 1344.68  | 1343.68   | 1343.70   | -0.02 | 1 IQNCIHKRAR              |
| 471 - 493   | 2572.24  | 2571.23   | 2571.22   | 0.01  | 1 NVTISNSEGVQEADRTSEGFYIR |

Match to: gi|130190; Score: 67

Matched peptides:

| Start - End | Observed | Mr (expt) | Mr (calc) | Delta | Miss Sequence                        |
|-------------|----------|-----------|-----------|-------|--------------------------------------|
| 38 - 60     | 1645.82  | 1644.81   | 1644.74   | 0.07  | 0 AGGGGGGGGGGGGAAAESVSK              |
| 330 - 340   | 1256.66  | 1255.66   | 1255.58   | 0.08  | 0 MIADCHAAPVR Oxidation (M)          |
| 452 - 466   | 1811.92  | 1810.91   | 1810.99   | -0.08 | 1 HILRTGTLCDMLLR                     |
| 456 - 466   | 1308.67  | 1307.67   | 1307.66   | 0.01  | 0 TGTLLCDMLLR Oxidation (M)          |
| 485 - 495   | 1254.62  | 1253.62   | 1253.55   | 0.07  | 0 CDGAALYYHGK                        |
| 583 - 591   | 1111.55  | 1110.55   | 1110.50   | 0.05  | 1 DDGQRMHPR                          |
| 707 - 723   | 1965.02  | 1964.02   | 1964.01   | 0.01  | 1 SLVNDLIFKESEETVVK                  |
| 731 - 740   | 1146.58  | 1145.58   | 1145.56   | 0.02  | 1 GDEDKNVEIK                         |
| 751 - 763   | 1433.74  | 1432.74   | 1432.75   | -0.01 | 0 GPIFVIVNACSTR                      |
| 957 - 968   | 1427.78  | 1426.77   | 1426.70   | 0.07  | 0 FTNSLLEMTDLK Oxidation (M)         |
| 991 - 1006  | 1703.85  | 1702.85   | 1702.86   | -0.01 | 0 DASLQIEDGSLVLEK                    |
| 1007 - 1029 | 2550.20  | 2549.20   | 2549.31   | -0.11 | 1 GEFSLGSVMNAVVSQVMQLRER             |
| 1099 - 1119 | 2367.26  | 2366.26   | 2366.07   | 0.19  | 0 FACPGEGLPPEIVQDMFNSR Oxidation (M) |

## Spot 2015

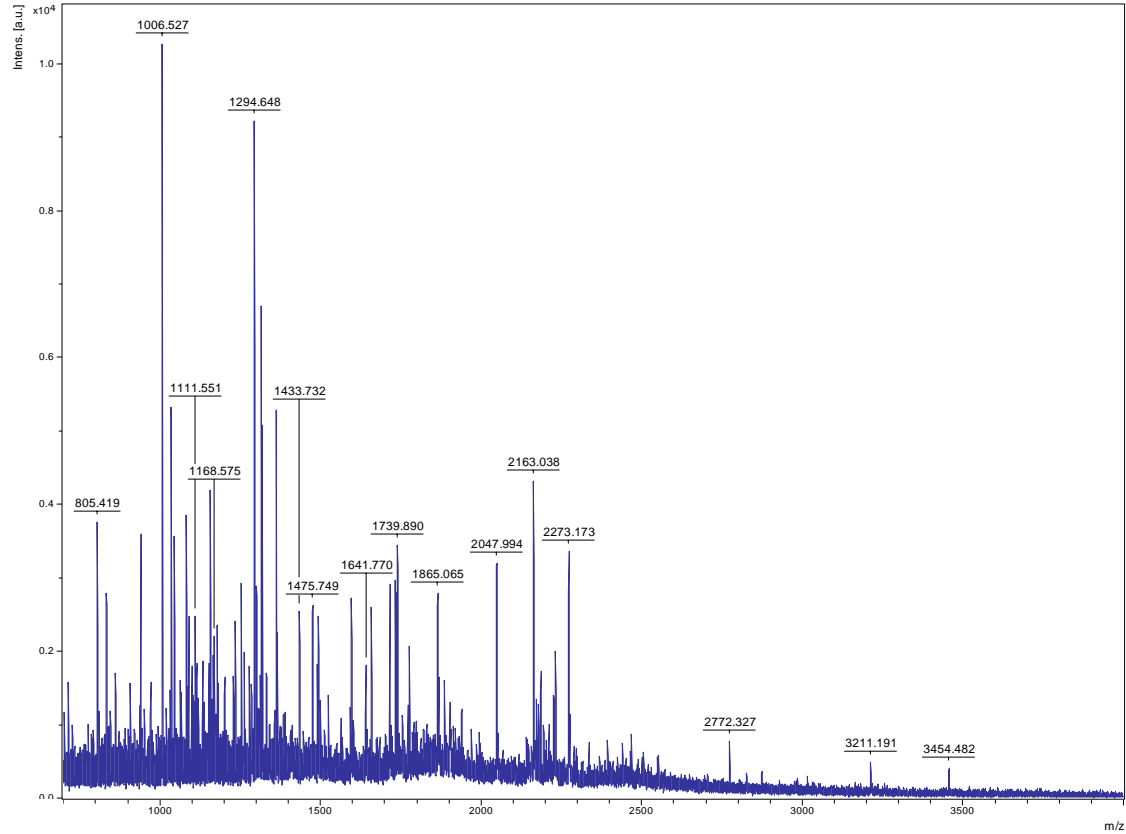

Match to: gi|77556798 Score: 70 Expect: 0.0064

### Matched peptides:

| Start - End | Observed  | Mr (expt) | Mr (calc) | Delta   | Miss Sequence                                             |
|-------------|-----------|-----------|-----------|---------|-----------------------------------------------------------|
| 54 - 63     | 1006.5114 | 1005.5041 | 1005.5243 | -0.0202 | 0 R.SAAAAFLER                                             |
| 75 - 88     | 1641.7701 | 1640.7628 | 1640.7616 | 0.0012  | 0 K.YQGLGNDPIMVDNR.D                                      |
| 131 - 147   | 1884.7951 | 1883.7878 | 1883.7777 | 0.0101  | 0 R.IFNSDGEPEMCGNGVR.C Carbamidomethyl (C); Oxidation (M) |
| 152 - 166   | 1733.9062 | 1732.8989 | 1732.8784 | 0.0206  | 0 R.FIALENLQGTSHFK.I                                      |
| 167 - 183   | 1775.9641 | 1774.9568 | 1774.9577 | -0.0009 | 0 K.IHTGAGLIHPEIQNDGK.V                                   |
| 186 - 206   | 2210.1297 | 2209.1224 | 2209.1664 | -0.0440 | 1 K.VDMGQPILSGPDIPKLPSTK.N Oxidation (M)                  |
| 269 - 279   | 1294.6641 | 1293.6568 | 1293.6564 | 0.0004  | 0 R.TNTEFVEVLSR.S                                         |
| 290 - 313   | 2231.0702 | 2230.0629 | 2230.1197 | -0.0568 | 0 R.GAGATLACGTGACAVVVAVLEGR.A 2 Carbamidomethyl (C)       |
| 318 - 332   | 1739.8774 | 1738.8701 | 1738.8712 | -0.0011 | 0 K.CVVDLPGGPLEIEWRE Carbamidomethyl (C)                  |
| 333 - 354   | 2439.0208 | 2438.0135 | 2438.0484 | -0.0349 | 0 R.EDDNHIYMTGPAEAVFYGSVH.- Oxidation (M)                 |

## Spot 2020

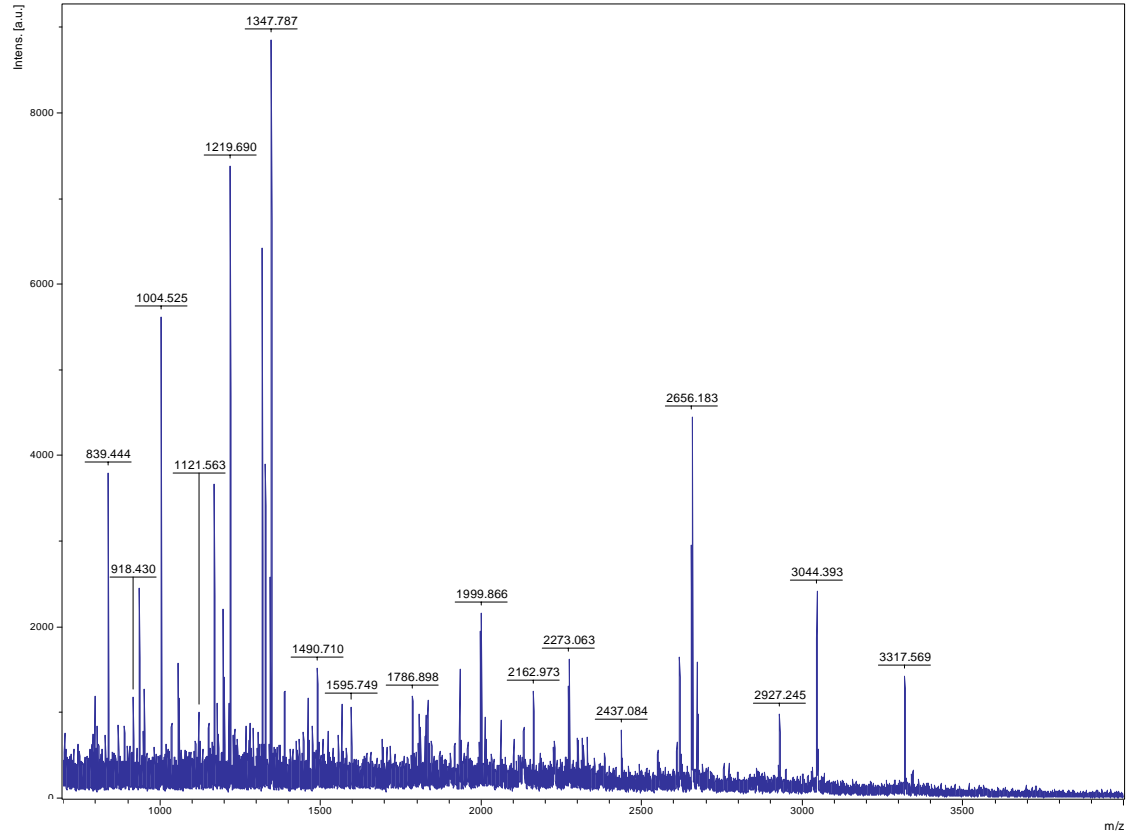

Match to: Q7FAY6\_ORYSA Score: 109 Expect: 8.4e-07

### Matched peptides:

| Start - End | Observed  | Mr (expt) | Mr (calc) | Delta   | Miss Sequence                                                |
|-------------|-----------|-----------|-----------|---------|--------------------------------------------------------------|
| 63 - 81     | 1996.8213 | 1995.8140 | 1995.8778 | -0.0638 | 0 K.SDMGVLGATSIDFSGHSCR.Y Carbamidomethyl (C)                |
| 63 - 81     | 2012.8235 | 2011.8162 | 2011.8727 | -0.0565 | 0 K.SDMGVLGATSIDFSGHSCR.Y Carbamidomethyl (C); Oxidation (M) |
| 82 - 89     | 1004.5251 | 1003.5178 | 1003.5127 | 0.0051  | 0 R.YFGYLVS.RK                                               |
| 92 - 122    | 3317.5691 | 3316.5618 | 3316.6067 | -0.0449 | 1 K.YVISIDDNCLPAKDNGGLTVDVAQHMSNLK.T Oxidation (M)           |
| 123 - 138   | 1933.8698 | 1932.8625 | 1932.9410 | -0.0785 | 0 K.TPATPFFFTNTLYDPFR.K                                      |
| 123 - 139   | 2061.9634 | 2060.9561 | 2061.0359 | -0.0798 | 1 K.TPATPFFFTNTLYDPFRK.G                                     |
| 146 - 152   | 839.4441  | 838.4368  | 838.4337  | 0.0031  | 0 R.GYFSLR.E                                                 |
| 211 - 222   | 1328.7219 | 1327.7146 | 1327.7322 | -0.0175 | 0 R.EVLGPVMFPALR.L                                           |
| 211 - 222   | 1344.7236 | 1343.7164 | 1343.7271 | -0.0107 | 0 R.EVLGPVMFPALR.L Oxidation (M)                             |
| 229 - 244   | 1999.8663 | 1998.8591 | 1998.9370 | -0.0779 | 1 K.HRWDLTLEDVWNLCAK.V Carbamidomethyl (C)                   |
| 256 - 263   | 936.4880  | 935.4807  | 935.4898  | -0.0091 | 0 K.TGLPYVMR.S                                               |
| 256 - 263   | 952.4990  | 951.4917  | 951.4848  | 0.0069  | 0 K.TGLPYVMR.S Oxidation (M)                                 |
| 264 - 276   | 1318.6916 | 1317.6844 | 1317.6776 | 0.0068  | 1 R.SDAEAGKALES.LKE                                          |
| 271 - 282   | 1388.7286 | 1387.7214 | 1387.7347 | -0.0133 | 1 K.ALES.LKEWEGVK.V                                          |
| 318 - 327   | 1058.6010 | 1057.5937 | 1057.5920 | 0.0017  | 0 K.LGPQNAIFAK.A                                             |



## Spot 2031

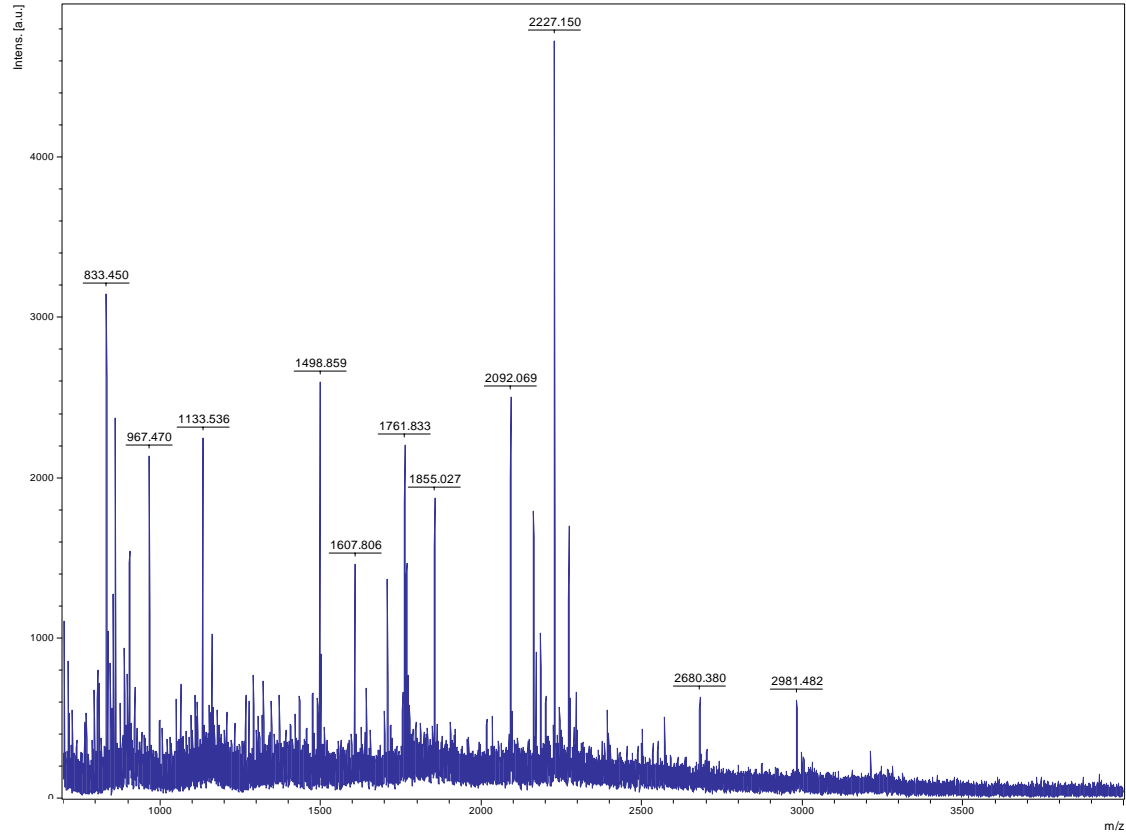

Match to: gi|50925303 Score: 115 Expect: 2.1e-07

### Matched peptides:

| Start - End | Observed  | Mr (expt) | Mr (calc) | Delta   | Miss Sequence                                        |
|-------------|-----------|-----------|-----------|---------|------------------------------------------------------|
| 6 - 13      | 833.3891  | 832.3818  | 832.4555  | -0.0737 | 0 K.IGINGFGR.I                                       |
| 49 - 57     | 1133.5369 | 1132.5296 | 1132.5301 | -0.0005 | 0 K.YDTVHGQWK.H                                      |
| 68 - 82     | 1755.9266 | 1754.9193 | 1754.9025 | 0.0169  | 1 K.TLLFGEKEVTVFGCR.N Carbamidomethyl (C)            |
| 75 - 82     | 967.4388  | 966.4315  | 966.4593  | -0.0277 | 0 K.EVTVFGCR.N Carbamidomethyl (C)                   |
| 83 - 109    | 2981.3074 | 2980.3001 | 2980.3977 | -0.0976 | 1 R.NPEEIPWGETGAEPVVESTGVFTDKDK.A                    |
| 141 - 164   | 2680.2516 | 2679.2443 | 2679.2884 | -0.0440 | 0 K.EYKPDIDIVSNASCTTNCLAPLAK.V 2 Carbamidomethyl (C) |
| 203 - 217   | 1434.7515 | 1433.7442 | 1433.7514 | -0.0072 | 0 R.AASFNIIPSTGAAK.A                                 |
| 237 - 250   | 1498.8534 | 1497.8461 | 1497.8402 | 0.0059  | 0 R.VPTVDVSVVDLTVR.L                                 |
| 251 - 261   | 1291.6901 | 1290.6828 | 1290.6819 | 0.0009  | 0 R.LEKPASYDQIK.A                                    |
| 274 - 293   | 2227.0631 | 2226.0558 | 2226.0440 | 0.0118  | 0 K.GILGYVEEDLVSTDFQGDNR.S                           |
| 301 - 311   | 1161.6158 | 1160.6085 | 1160.6189 | -0.0104 | 0 K.AGIALNDNFVK.L                                    |
| 312 - 325   | 1761.7992 | 1760.7919 | 1760.7794 | 0.0125  | 0 K.LVSWYDNEWGYSSR.V                                 |

## Spot 2033

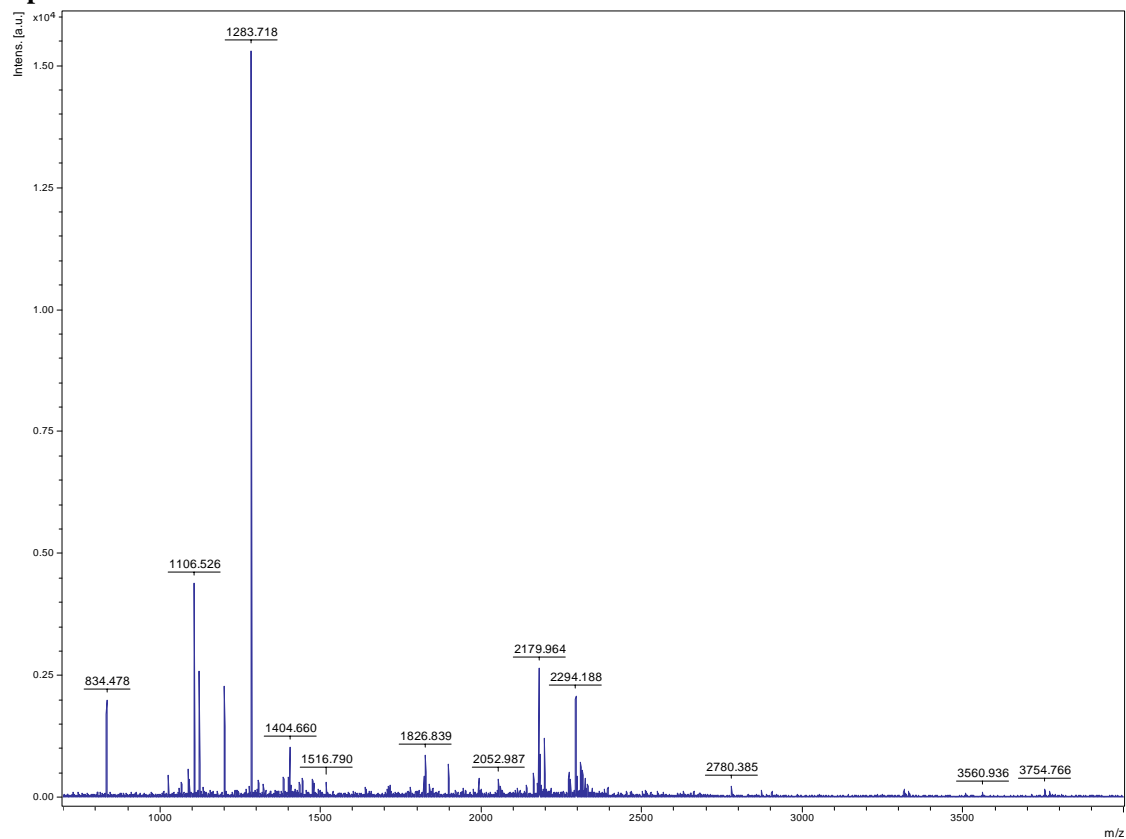

Match to: gi|46391111 Score: 145 Expect: 1.3e-10

### Matched peptides:

| Start - End | Observed  | Mr (expt) | Mr (calc) | Delta   | Miss Sequence              |                                    |
|-------------|-----------|-----------|-----------|---------|----------------------------|------------------------------------|
| 18 - 37     | 2311.1462 | 2310.1390 | 2310.1426 | -0.0036 | 0 K.EHAMDPREAIQSYKPK.N.L   | Oxidation (M)                      |
| 40 - 54     | 1444.7657 | 1443.7585 | 1443.7681 | -0.0096 | 1 K.DKVAIVTGGDSGIGR.A      |                                    |
| 42 - 54     | 1201.6489 | 1200.6417 | 1200.6462 | -0.0045 | 0 K.VAIVTGGDSGIGR.A        |                                    |
| 74 - 85     | 1404.6595 | 1403.6523 | 1403.6528 | -0.0005 | 1 K.GQEEKDAEETLR.A         |                                    |
| 79 - 85     | 833.3946  | 832.3873  | 832.3926  | -0.0053 | 0 K.DAEETLR.A              |                                    |
| 94 - 113    | 2179.9636 | 2178.9563 | 2178.9674 | -0.0110 | 1 R.TGAKDPMaipADLGYDDNCR.K | Carbamidomethyl (C)                |
| 94 - 113    | 2195.9617 | 2194.9544 | 2194.9623 | -0.0079 | 1 R.TGAKDPMaipADLGYDDNCR.K | Carbamidomethyl (C); Oxidation (M) |
| 98 - 113    | 1822.7638 | 1821.7565 | 1821.7662 | -0.0096 | 0 K.DPMaipADLGYDDNCR.K     | Carbamidomethyl (C)                |
| 157 - 167   | 1384.7124 | 1383.7051 | 1383.6533 | 0.0519  | 0 R.TNIFYFFMSK.H           |                                    |
| 157 - 167   | 1400.6390 | 1399.6318 | 1399.6482 | -0.0164 | 0 R.TNIFYFFMSK.H           | Oxidation (M)                      |
| 178 - 197   | 1897.8949 | 1896.8876 | 1896.8999 | -0.0123 | 0 R.GGAGAGGCSIINTSSINAYK.G | Carbamidomethyl (C)                |
| 201 - 209   | 1025.5416 | 1024.5344 | 1024.5441 | -0.0097 | 0 K.TLLDYATK.G             |                                    |
| 210 - 217   | 834.4776  | 833.4703  | 833.4759  | -0.0056 | 0 K.GAIVAFTR.A             |                                    |
| 218 - 229   | 1283.7180 | 1282.7107 | 1282.7244 | -0.0137 | 0 R.ALALQLAEEGIR.V         |                                    |
| 254 - 263   | 1089.5077 | 1088.5004 | 1088.5073 | -0.0069 | 0 R.QFGSQVPMGR.A           | Pyro-glu (N-term Q)                |
| 254 - 263   | 1105.4729 | 1104.4656 | 1104.5022 | -0.0366 | 0 R.QFGSQVPMGR.A           | Oxidation (M); Pyro-glu (N-term Q) |
| 254 - 263   | 1106.5264 | 1105.5191 | 1105.5338 | -0.0147 | 0 R.QFGSQVPMGR.A           |                                    |
| 254 - 263   | 1122.5227 | 1121.5154 | 1121.5287 | -0.0133 | 0 R.QFGSQVPMGR.A           | Oxidation (M)                      |

## Spot 2035

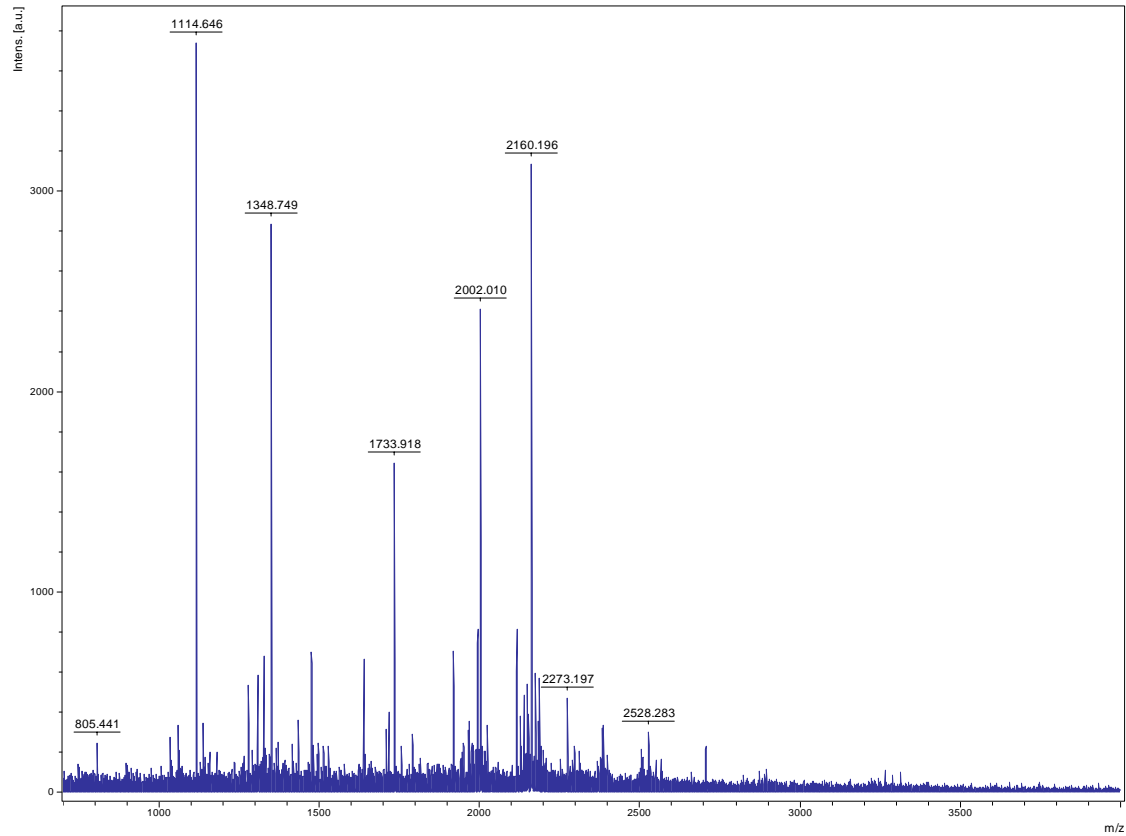

Match to: gi|57899533; Score: 127

Matched peptides:

| Start - End | Observed | Mr (expt) | Mr (calc) | Delta | Miss Sequence           |
|-------------|----------|-----------|-----------|-------|-------------------------|
| 140 - 161   | 2160.20  | 2159.19   | 2159.16   | 0.04  | 0 SVLEPTSGNTGIGLAFIAASR |
| 196 - 203   | 805.44   | 804.44    | 804.42    | -0.02 | 1 GMKGAVDK              |
| 228 - 242   | 1790.80  | 1789.79   | 1789.82   | -0.02 | 0 VHYETTGPEIWEDSK       |
| 243 - 263   | 1919.04  | 1918.03   | 1918.03   | 0.01  | 1 GKVDVFIGGIGTGGTISGAGR |
| 245 - 263   | 1733.92  | 1732.92   | 1732.91   | 0.01  | 0 VDVFVFIGGIGTGGTISGAGR |
| 274 - 294   | 2116.18  | 2115.17   | 2115.13   | 0.04  | 0 VIGIEPESNILSGGKPGPHK  |
| 295 - 305   | 1114.65  | 1113.64   | 1113.63   | 0.01  | 0 IQGIGAGFVPR           |
| 362 - 373   | 1348.75  | 1347.75   | 1347.75   | -0.01 | 0 LVVVVFPFGER           |
| 374 - 384   | 1326.72  | 1325.72   | 1325.73   | -0.01 | 0 YLSSILFQSIR           |
| 374 - 389   | 2002.01  | 2001.01   | 2000.99   | 0.02  | 1 YLSSILFQSIRECEK       |

# Spot 2046

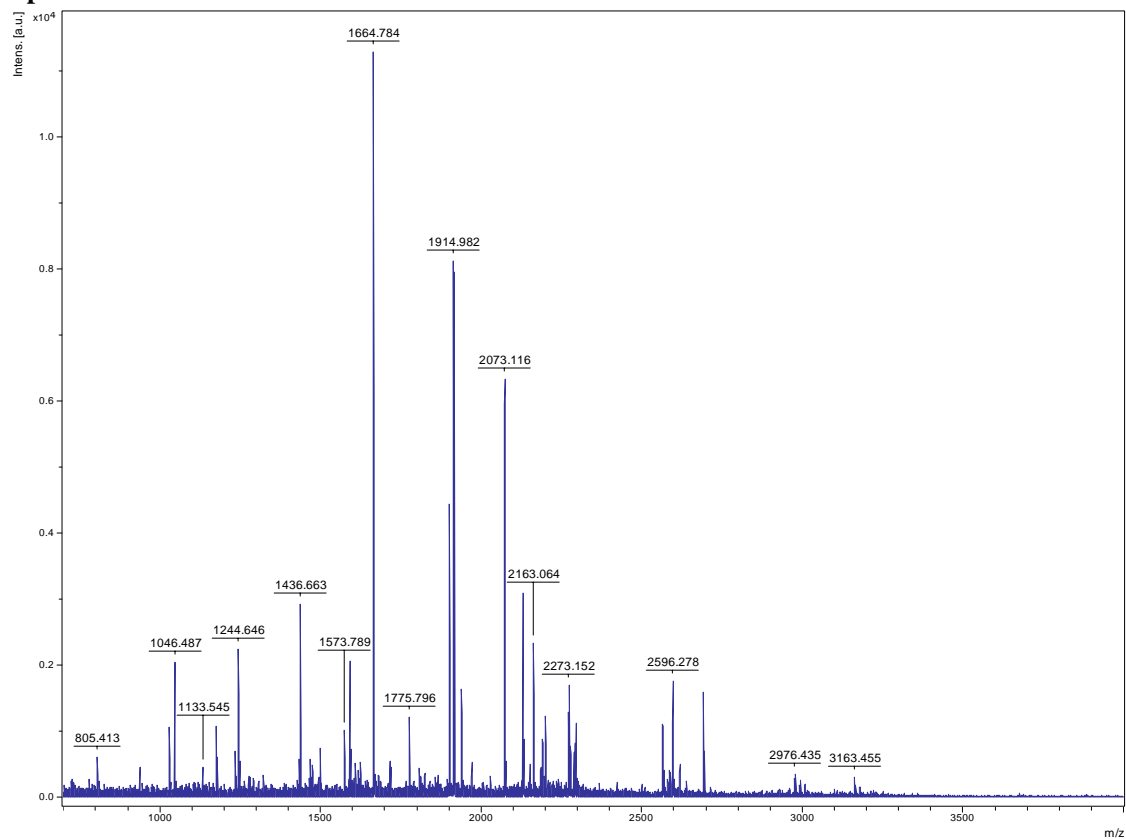

Match to: gi|51964302; Score: 113

## Matched peptides:

| Start - End | Observed | Mr (expt) | Mr (calc) | Delta | Miss Sequence                                 |
|-------------|----------|-----------|-----------|-------|-----------------------------------------------|
| 13 - 31     | 1914.98  | 1913.98   | 1913.98   | 0.00  | 0 VCIIGSGPSAHTAAYIY AAR                       |
| 106 - 127   | 2073.12  | 2072.11   | 2072.11   | 0.00  | 0 VASDSTTVLADAVVVATGAVAR                      |
| 128 - 140   | 1592.76  | 1591.76   | 1591.76   | -0.00 | 1 RLHFAGSDAYWNR                               |
| 129 - 140   | 1436.66  | 1435.66   | 1435.66   | -0.00 | 0 LHFAGSDAYWNR                                |
| 141 - 156   | 1664.78  | 1663.78   | 1663.78   | 0.00  | 0 GISACAVCDGAAPIFR                            |
| 157 - 178   | 2278.13  | 2277.12   | 2277.13   | -0.01 | 0 NKPIAVIGGGDSAMEESNFLTK                      |
| 157 - 178   | 2294.14  | 2293.14   | 2293.13   | 0.01  | 0 NKPIAVIGGGDSAMEESNFLTK Oxidation (M)        |
| 179 - 188   | 1244.65  | 1243.64   | 1243.65   | -0.00 | 0 YGSHVYIIHR                                  |
| 241 - 260   | 2130.12  | 2129.11   | 2129.12   | -0.00 | 0 ISDLQVSGLFFAIGHEPATK                        |
| 261 - 286   | 2691.38  | 2690.37   | 2690.36   | 0.02  | 0 FLGGQLELDADGYVATKPGSTHTSVK                  |
| 301 - 329   | 2976.44  | 2975.43   | 2975.38   | 0.06  | 0 QAITAAGSGCMAALDAEHYLQEVGAQEGK               |
| 301 - 329   | 2992.38  | 2991.38   | 2991.37   | 0.01  | 0 QAITAAGSGCMAALDAEHYLQEVGAQEGK Oxidation (M) |

## Spot 2049

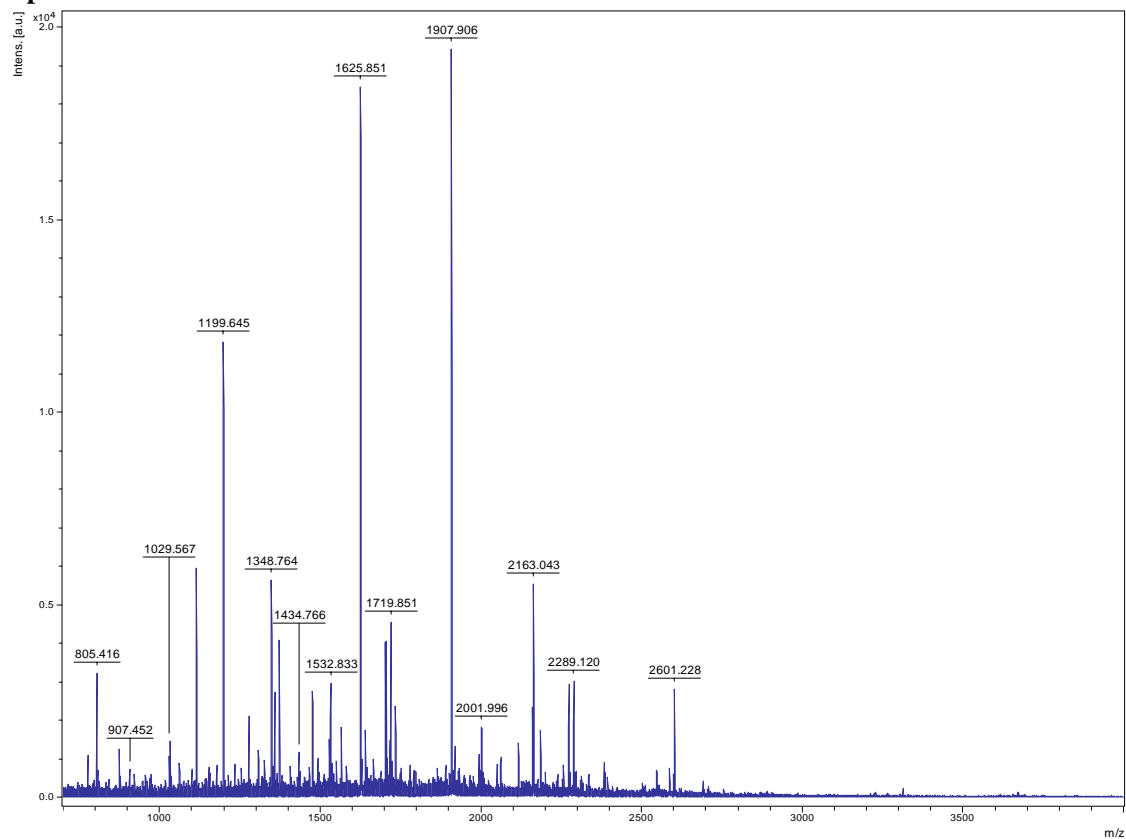

Match to: gi|34897250; Score: 92

Matched peptides:

| Start - End | Observed | Mr (expt) | Mr (calc) | Delta | Miss Sequence                           |
|-------------|----------|-----------|-----------|-------|-----------------------------------------|
| 77 - 90     | 1372.72  | 1371.72   | 1371.70   | 0.02  | 0 GAGVDIDAGTELVR                        |
| 77 - 91     | 1528.81  | 1527.81   | 1527.80   | 0.01  | 1 GAGVDIDAGTELVRR                       |
| 257 - 267   | 1199.64  | 1198.64   | 1198.63   | 0.01  | 0 SGLSLNDQLPR                           |
| 268 - 288   | 2255.08  | 2254.08   | 2254.12   | -0.04 | 0 NDGMITTVGEALMAPTVIYVK 2 Oxidation (M) |
| 289 - 296   | 956.57   | 955.57    | 955.57    | 0.00  | 0 QVLEIINK                              |
| 301 - 316   | 1625.85  | 1624.85   | 1624.83   | 0.02  | 0 GIAHITGGGFDTNIPR                      |
| 317 - 325   | 875.50   | 874.49    | 874.49    | 0.00  | 0 VFPSGLGAK                             |
| 326 - 338   | 1532.83  | 1531.83   | 1531.82   | 0.01  | 0 IFTAWEVPPVFR                          |
| 339 - 352   | 1703.86  | 1702.86   | 1702.83   | 0.03  | 1 WIQEVGKIEDAEMR                        |
| 339 - 352   | 1719.85  | 1718.85   | 1718.83   | 0.02  | 1 WIQEVGKIEDAEMR Oxidation (M)          |
| 368 - 385   | 1907.91  | 1906.90   | 1906.89   | 0.01  | 0 EAADGILEGTHGPNHAYR                    |
| 386 - 398   | 1358.71  | 1357.71   | 1357.69   | 0.02  | 0 IGEVISGEGVHYV                         |

Match to: gi|57899533; Score: 82

Matched peptides:

| Start - End | Observed | Mr (expt) | Mr (calc) | Delta | Miss Sequence                |
|-------------|----------|-----------|-----------|-------|------------------------------|
| 121 - 132   | 1358.71  | 1357.71   | 1357.61   | 0.10  | 0 IGYSMISDAEEK Oxidation (M) |
| 140 - 161   | 2160.15  | 2159.15   | 2159.16   | -0.01 | 0 SVLVEPTSGNTGIGLAFIAASR     |
| 196 - 203   | 805.42   | 804.41    | 804.42    | -0.00 | 1 GMKGAVDK                   |
| 243 - 263   | 1919.02  | 1918.01   | 1918.03   | -0.01 | 1 GKVDVFIGGIGTGGTISGAGR      |
| 245 - 263   | 1733.93  | 1732.92   | 1732.91   | 0.01  | 0 VDVFVFIGGIGTGGTISGAGR      |
| 274 - 294   | 2116.12  | 2115.12   | 2115.13   | -0.02 | 0 VIGIEPSESNILSGGKPGPHK      |
| 295 - 305   | 1114.64  | 1113.64   | 1113.63   | 0.01  | 0 IQGIGAGFVPR                |
| 362 - 373   | 1348.76  | 1347.76   | 1347.75   | 0.01  | 0 LVVVVFPSFGER               |
| 374 - 384   | 1326.73  | 1325.73   | 1325.73   | -0.01 | 0 YLSSILFQSIR                |
| 374 - 389   | 2002.00  | 2000.99   | 2000.99   | 0.01  | 1 YLSSILFQSIRECEK            |

## Spot 2052

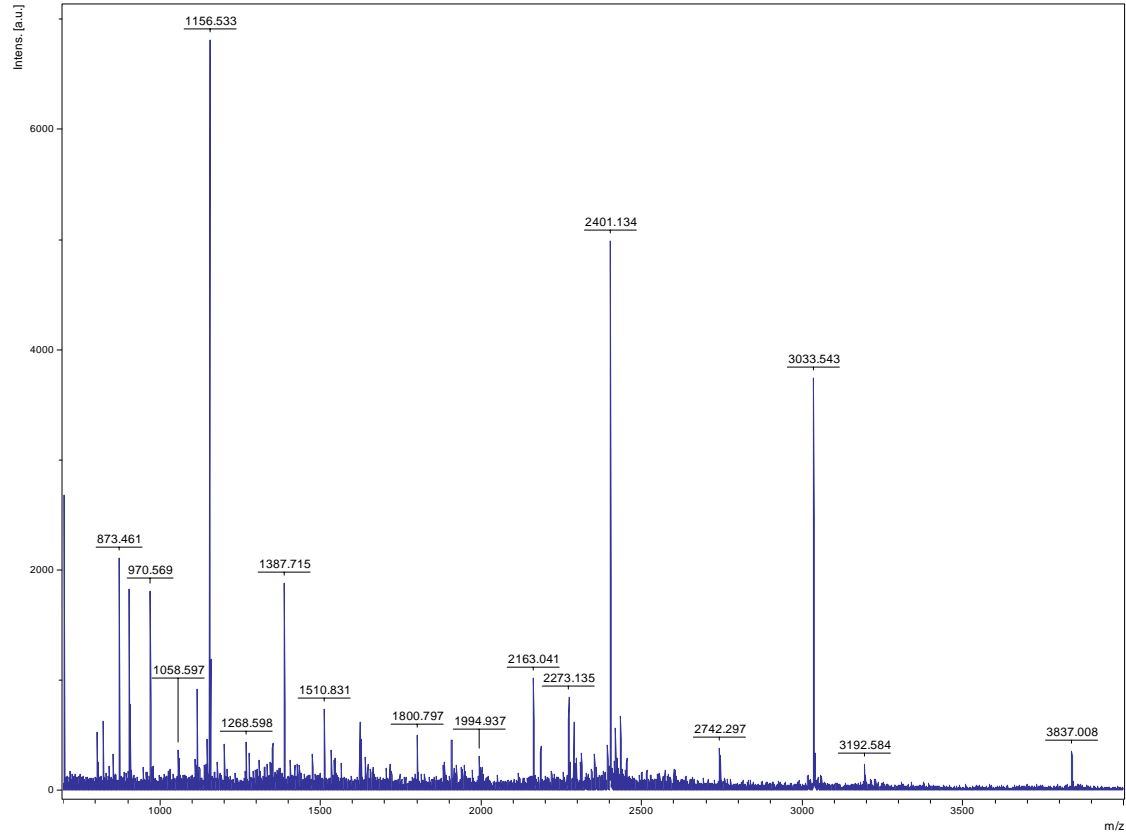

Match to: gi|108864048 Score: 69 Expect: 0.0098

### Matched peptides:

| Start - End | Observed  | Mr (expt) | Mr (calc) | Delta   | Miss Sequence                                     |
|-------------|-----------|-----------|-----------|---------|---------------------------------------------------|
| 68 - 81     | 1543.8978 | 1542.8905 | 1542.8114 | 0.0792  | 1 K.RLASIGLENTEANR.Q                              |
| 69 - 81     | 1387.7927 | 1386.7854 | 1386.7103 | 0.0752  | 0 R.LASIGLENTEANR.Q                               |
| 118 - 126   | 1058.6197 | 1057.6124 | 1057.6019 | 0.0105  | 0 K.IVDILTEQK.I                                   |
| 136 - 158   | 2401.1367 | 2400.1294 | 2400.1491 | -0.0197 | 0 K.GLVPLAGSNNESWCQGLDGLASR.E Carbamidomethyl (C) |
| 159 - 168   | 1156.5822 | 1155.5749 | 1155.5308 | 0.0441  | 0 R.EAAYYQQGAR.F                                  |
| 174 - 188   | 1510.9050 | 1509.8977 | 1509.8402 | 0.0575  | 0 R.TVVSIPNGPSELAVK.E                             |
| 189 - 196   | 873.4026  | 872.3953  | 872.4504  | -0.0551 | 0 K.EAAWGLAR.Y                                    |
| 197 - 224   | 3033.4248 | 3032.4175 | 3032.5454 | -0.1279 | 0 R.YAAISQDNLVPIVEPELLDGEHGIDR.T                  |
| 265 - 278   | 1622.8371 | 1621.8298 | 1621.7947 | 0.0351  | 1 K.DRATPEQVSDYTLK.L                              |
| 267 - 278   | 1351.7398 | 1350.7325 | 1350.6667 | 0.0658  | 0 R.ATPEQVSDYTLK.L                                |
| 334 - 343   | 1115.5905 | 1114.5832 | 1114.5407 | 0.0425  | 0 K.TWGGQPENVK.A                                  |
| 344 - 352   | 970.5548  | 969.5475  | 969.5607  | -0.0132 | 0 K.AAQDALLR.A                                    |

## Spot 2053

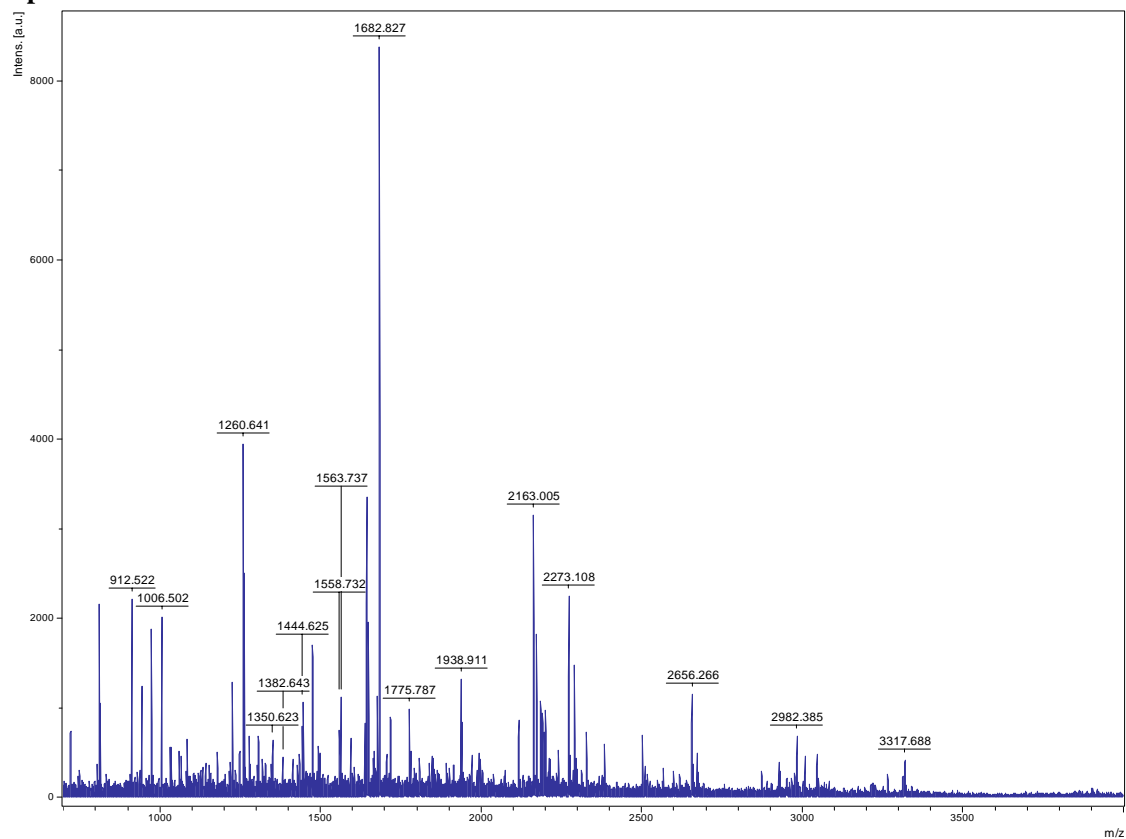

Match to: gi|34015231; Score: 181

### Matched peptides:

| Start - End | Observed | Mr (expt) | Mr (calc) | Delta | Miss Sequence                                |
|-------------|----------|-----------|-----------|-------|----------------------------------------------|
| 8 - 17      | 1225.67  | 1224.67   | 1224.67   | -0.00 | 0 GHERPLTFLR                                 |
| 18 - 30     | 1558.73  | 1557.73   | 1557.72   | 0.00  | 1 YNRDGDLLFSCAK                              |
| 31 - 44     | 1643.71  | 1642.70   | 1642.71   | -0.01 | 0 DHTPNVWFADNGDR                             |
| 50 - 62     | 1444.63  | 1443.62   | 1443.63   | -0.01 | 0 GHNGAVWFSCDVSR                             |
| 78 - 85     | 974.52   | 973.52    | 973.50    | 0.02  | 0 LWDVQTGR                                   |
| 86 - 91     | 812.44   | 811.44    | 811.42    | 0.02  | 0 ELFTFR                                     |
| 98 - 125    | 2982.38  | 2981.38   | 2981.47   | -0.09 | 0 SVEFAIGDGLAVITTDNFMENVPTAQVK Oxidation (M) |
| 126 - 146   | 2328.13  | 2327.13   | 2327.19   | -0.05 | 1 RIAEDPDDQSEESLLVITGIK                      |
| 127 - 146   | 2172.04  | 2171.04   | 2171.08   | -0.04 | 0 IAEDPDDQSEESLLVITGIK                       |
| 152 - 159   | 912.52   | 911.52    | 911.50    | 0.02  | 0 AVWGPLNR                                   |
| 160 - 171   | 1260.64  | 1259.64   | 1259.67   | -0.03 | 0 TITAGEDATIR                                |
| 172 - 182   | 1350.62  | 1349.62   | 1349.63   | -0.01 | 0 IWDTETGQCLK                                |
| 200 - 213   | 1563.74  | 1562.74   | 1562.74   | -0.00 | 0 SADWSHFLTGSLDK                             |
| 276 - 285   | 1085.62  | 1084.62   | 1084.61   | 0.01  | 0 ILQEEIGGVK                                 |
| 286 - 301   | 1682.83  | 1681.83   | 1681.83   | -0.01 | 0 GHFGPINALAFNPDGR                           |
| 314 - 326   | 1648.79  | 1647.79   | 1647.80   | -0.02 | 1 LHHFDSDYFNKI                               |

# Spot 2057

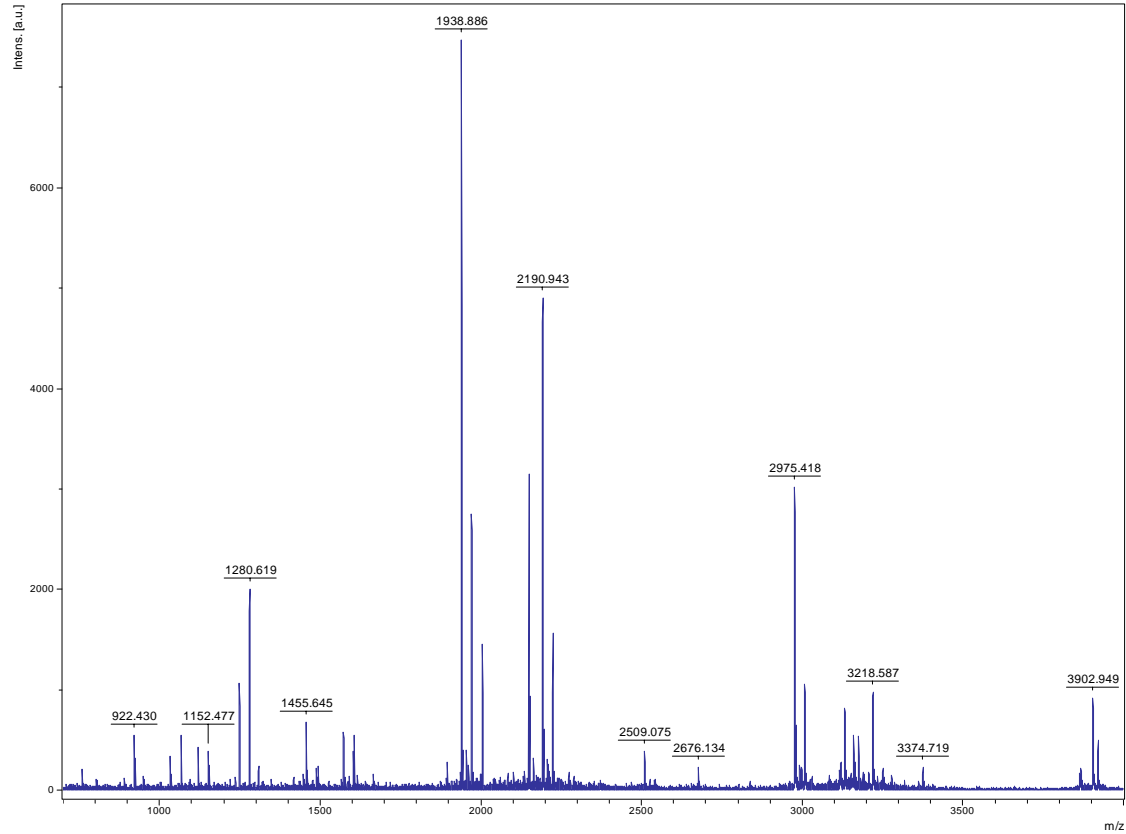

Match to: [gi|1346109](#); Score: 230

| Start - End | Observed | Mr (expt) | Mr (calc) | Delta | Miss Sequence                               |
|-------------|----------|-----------|-----------|-------|---------------------------------------------|
| 40 - 69     | 3218.59  | 3217.59   | 3217.60   | -0.02 | 1 DKSLVWDLTNPVQNVGEGAGASEYGVFPR             |
| 42 - 69     | 2975.42  | 2974.42   | 2974.48   | -0.07 | 0 SLLVWDLTNPVQNVGEGAGASEYGVFPR              |
| 42 - 70     | 3131.53  | 3130.53   | 3130.58   | -0.05 | 1 SLLVWDLTNPVQNVGEGAGASEYGVFPR              |
| 101 - 111   | 1248.63  | 1247.63   | 1247.65   | -0.02 | 0 LWDLSTGVVTR                               |
| 113 - 130   | 2004.97  | 2003.97   | 2004.01   | -0.04 | 1 FVGHDKDVLVAFVSDNR                         |
| 143 - 151   | 1120.52  | 1119.52   | 1119.54   | -0.02 | 0 LWNTLGECK                                 |
| 152 - 172   | 2190.94  | 2189.94   | 2189.99   | -0.05 | 0 YTIIGDLGGEGHNGWVSCVR                      |
| 173 - 189   | 1938.89  | 1937.88   | 1937.93   | -0.04 | 0 FSPNTFQPTIVGSGWDR                         |
| 193 - 200   | 1034.48  | 1033.47   | 1033.50   | -0.03 | 0 VWNLTNCK                                  |
| 203 - 229   | 2676.13  | 2675.13   | 2675.21   | -0.08 | 0 CNLEGGHYVNAVAVSPDGLSCASGGK                |
| 230 - 243   | 1572.79  | 1571.79   | 1571.83   | -0.04 | 1 DGVTLWDLAEGKR                             |
| 244 - 262   | 2150.02  | 2149.02   | 2149.06   | -0.04 | 0 LYSLDAGSIHSLCFSPNR                        |
| 263 - 274   | 1455.64  | 1454.64   | 1454.69   | -0.04 | 0 YWLCAATQDSIK                              |
| 275 - 281   | 890.42   | 889.42    | 889.45    | -0.04 | 0 IWDLESK                                   |
| 282 - 295   | 1602.86  | 1601.86   | 1601.91   | -0.05 | 0 HIVQDLKPEIPVSK                            |
| 296 - 323   | 3158.38  | 3157.38   | 3157.41   | -0.03 | 0 NQMLYCTSLNWSADGSTLYAGYTDGTR               |
| 296 - 323   | 3174.40  | 3173.40   | 3173.41   | -0.00 | 0 NQMLYCTSLNWSADGSTLYAGYTDGTR Oxidation (M) |



## Spot 2060

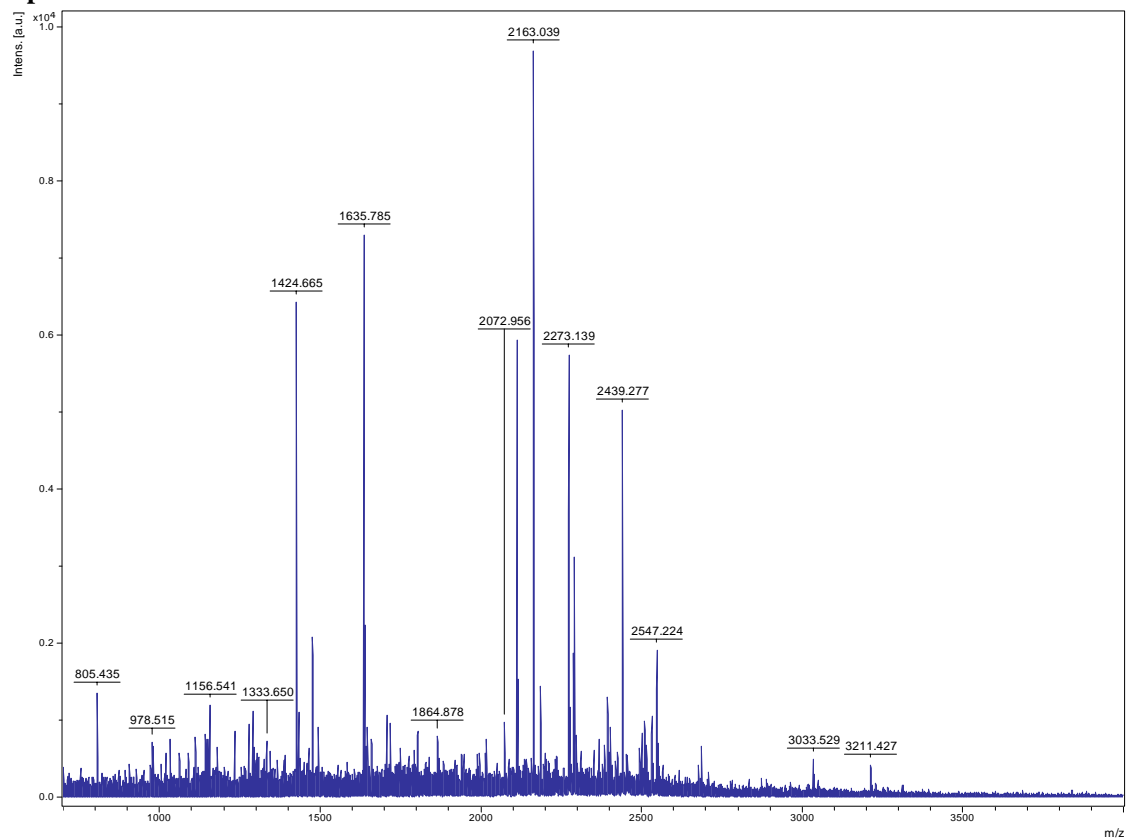

Match to: gi|51963288; Score: 81

Matched peptides:

| Start - End | Observed | Mr (expt) | Mr (calc) | Delta | Miss Sequence                            |
|-------------|----------|-----------|-----------|-------|------------------------------------------|
| 70 - 84     | 1635.79  | 1634.78   | 1634.77   | 0.01  | 0 SYVFGEDVGFGGVFR                        |
| 98 - 121    | 2509.19  | 2508.18   | 2508.23   | -0.04 | 0 VFNTPLCEQGIAGFAVGLAAMGNR Oxidation (M) |
| 150 - 162   | 1424.67  | 1423.66   | 1423.65   | -0.01 | 0 SGNEFNCGLTIR                           |
| 202 - 220   | 2112.16  | 2111.16   | 2111.18   | -0.02 | 1 GLLLASIRDNPVVFPEPK                     |
| 225 - 246   | 2531.24  | 2530.24   | 2530.25   | -0.01 | 0 LAVEEVPEEDYMLPLSEAEVIR                 |
| 225 - 246   | 2547.22  | 2546.22   | 2546.25   | -0.02 | 0 LAVEEVPEEDYMLPLSEAEVIR Oxidation (M)   |
| 273 - 283   | 1290.64  | 1289.64   | 1289.63   | -0.01 | 0 DGISCELIDLR                            |
| 284 - 299   | 1802.93  | 1801.92   | 1801.95   | -0.02 | 1 TLIPWDRKETVEASVSK                      |
| 303 - 326   | 2439.28  | 2438.27   | 2438.28   | -0.01 | 0 LLVSHEAPITGGFGAEIAASITER               |

## Spot 2072

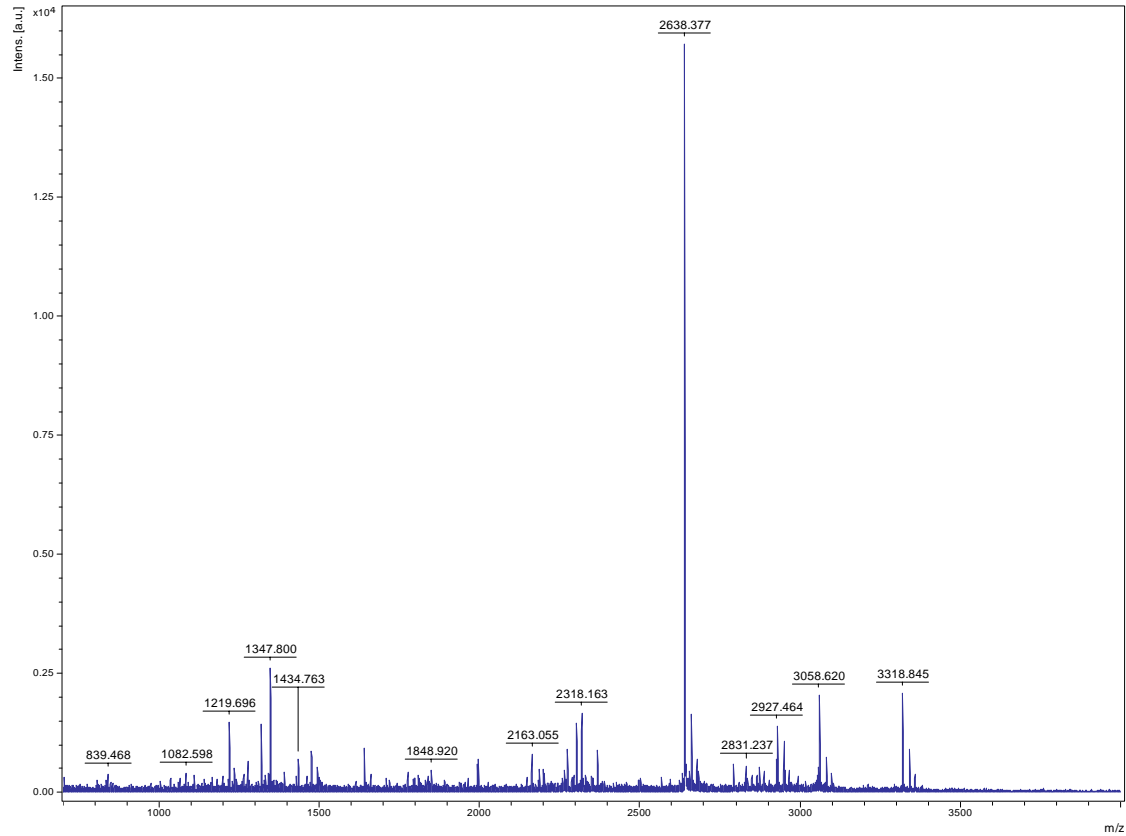

Match to: gi|50932771; Score: 74

### Matched peptides:

| Start - End | Observed Mr (expt) | Mr (calc) | Delta | Miss Sequence                       |
|-------------|--------------------|-----------|-------|-------------------------------------|
| 29 - 47     | 1809.06            | 1808.06   | -0.00 | 0 VAILGAAGGIGQLALLMK Oxidation (M)  |
| 48 - 80     | 3318.84            | 3317.84   | 0.06  | 0 LNPLVSSLSLYDIAGTPGVAADVSHINSPALVK |
| 81 - 106    | 2638.38            | 2637.37   | 0.01  | 0 GFVGEELQLEALEGSDVVIPAGVPR         |
| 113 - 124   | 1318.70            | 1317.69   | 0.00  | 0 DDLFNINAGIVK                      |
| 167 - 178   | 1347.80            | 1346.80   | 0.01  | 1 KLFVVTLLDVVR                      |
| 168 - 178   | 1219.70            | 1218.69   | -0.00 | 0 LFGVTTLDVVR                       |
| 268 - 294   | 2927.46            | 2926.46   | 0.02  | 0 GLNGVPDVVECSFVQSTVTELPFFASK       |

**Spot 2074**

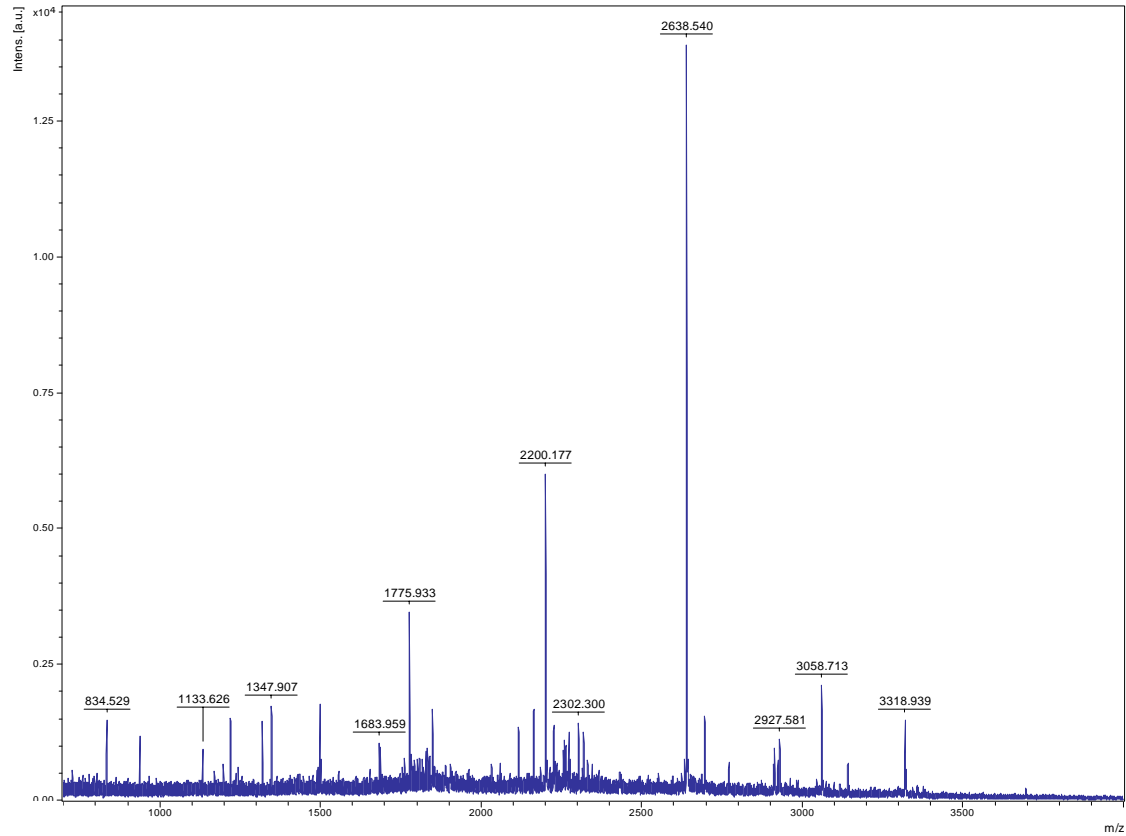

Match to: Q6K5G8\_ORYSA Score: 72 Expect: 0.0045

**Matched peptides:**

| Start - End | Observed  | Mr (expt) | Mr (calc) | Delta  | Miss Sequence                      |
|-------------|-----------|-----------|-----------|--------|------------------------------------|
| 6 - 13      | 833.5287  | 832.5215  | 832.4555  | 0.0660 | 0 K.IGINGFGR.I                     |
| 49 - 57     | 1133.6263 | 1132.6191 | 1132.5301 | 0.0889 | 0 K.YDVTVHGQWK.H                   |
| 75 - 82     | 937.5724  | 936.5651  | 936.4487  | 0.1164 | 0 K.EVAVFGCR.N Carbamidomethyl (C) |
| 83 - 109    | 2923.5662 | 2922.5589 | 2922.3922 | 0.1667 | 1 R.NPEEIPWAAAGA EYVVESTGVFTDKDK.A |
| 189 - 196   | 834.5287  | 833.5215  | 833.3953  | 0.1262 | 0 K.TVDGPSMK.D                     |
| 237 - 250   | 1498.9606 | 1497.9533 | 1497.8402 | 0.1131 | 0 R.VPTVDVSVVDLTVR.L               |
| 274 - 293   | 2200.1772 | 2199.1700 | 2199.0331 | 0.1369 | 0 K.GILGYVEEDLVSTDFQGDSR.S         |
| 312 - 325   | 1775.9330 | 1774.9257 | 1774.7951 | 0.1306 | 0 K.LVSWYDNEWGYSTR.V               |

### Spot 2076

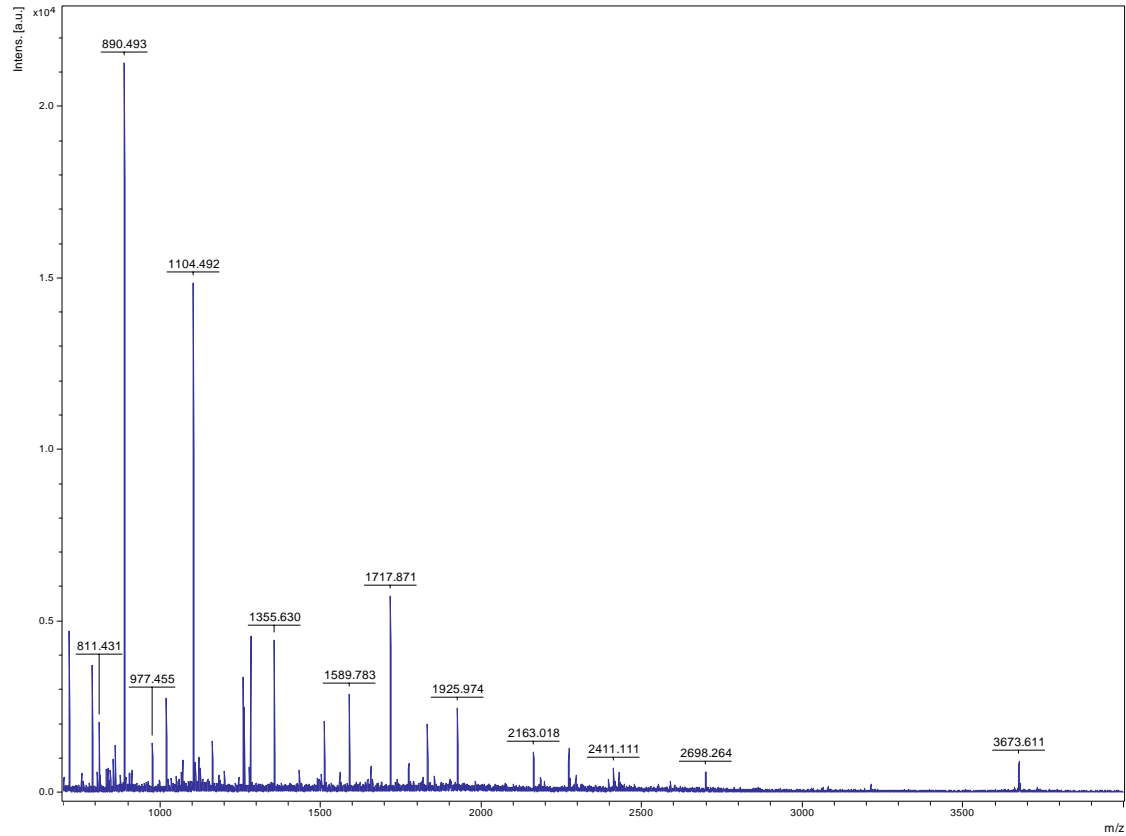

Match to: gi|55733795 Score: 72 Expect: 0.0039

#### Matched peptides:

| Start - End | Observed  | Mr (expt) | Mr (calc) | Delta   | Miss Sequence                                |
|-------------|-----------|-----------|-----------|---------|----------------------------------------------|
| 19 - 30     | 1355.6299 | 1354.6226 | 1354.6517 | -0.0291 | 1 R.GEDDKFSLAFAR.I                           |
| 24 - 30     | 811.4308  | 810.4236  | 810.4388  | -0.0152 | 0 K.FSLAFAR.I                                |
| 31 - 39     | 1163.5579 | 1162.5506 | 1162.5771 | -0.0265 | 0 R.IENHYFVNK.G                              |
| 40 - 54     | 1656.7761 | 1655.7688 | 1655.8155 | -0.0466 | 0 K.GFLPDSHLLDNVDK.I                         |
| 40 - 56     | 1925.9736 | 1924.9664 | 1925.0006 | -0.0343 | 1 K.GFLPDSHLLDNVDKIR.H                       |
| 82 - 89     | 977.4546  | 976.4473  | 976.4654  | -0.0181 | 0 K.AWPEAEFK.M                               |
| 90 - 113    | 2411.1108 | 2410.1036 | 2410.1433 | -0.0398 | 0 K.MVPDAGHSANEVGVAAELVSANEK.L Oxidation (M) |

## Spot 2078

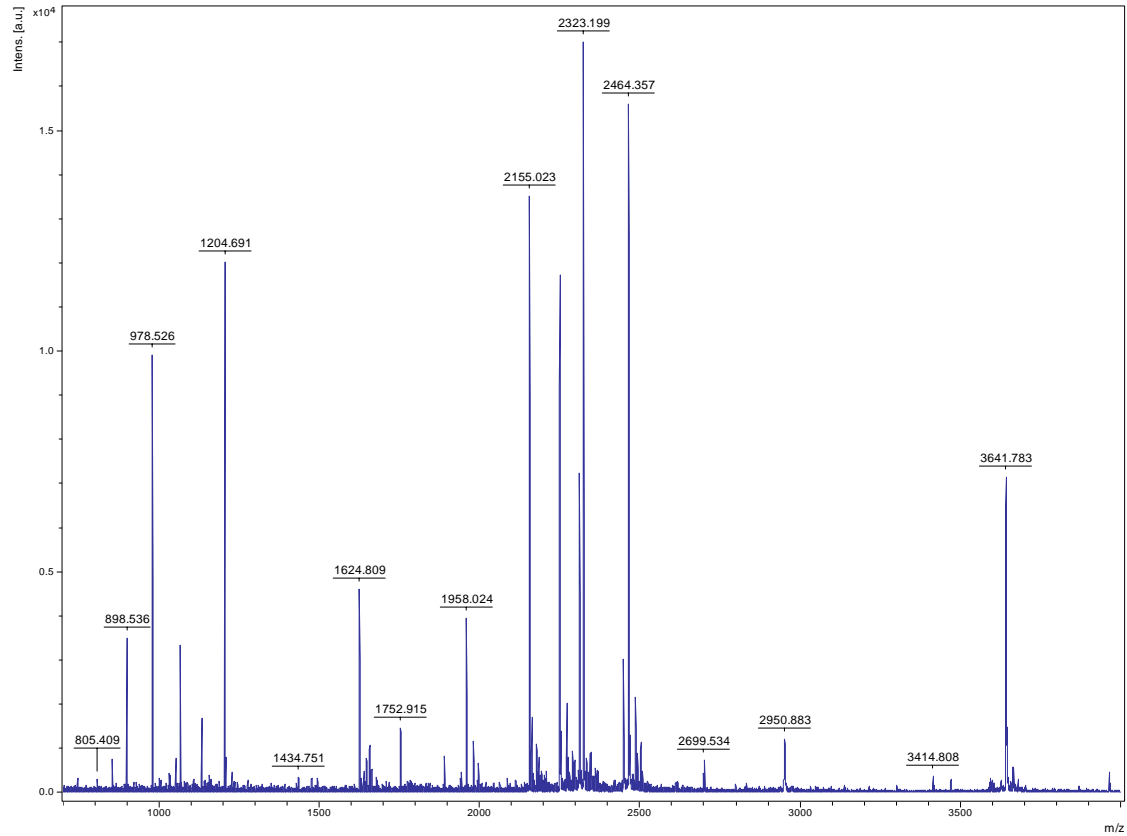

Match to: gi|34894098; Score: 205

### Matched peptides:

| Start - End | Observed | Mr (expt) | Mr (calc) | Delta | Miss Sequence                                |
|-------------|----------|-----------|-----------|-------|----------------------------------------------|
| 2 - 9       | 805.41   | 804.41    | 804.40    | 0.01  | 1 ASGEEKK                                    |
| 12 - 23     | 1204.69  | 1203.69   | 1203.70   | -0.01 | 0 ILVVGGTGYIGR                               |
| 24 - 31     | 852.49   | 851.48    | 851.50    | -0.01 | 0 HVVLASAR                                   |
| 42 - 58     | 1888.97  | 1887.97   | 1887.97   | -0.00 | 1 DLSPDPAKSQLLQSFRR                          |
| 51 - 58     | 978.53   | 977.52    | 977.53    | -0.01 | 0 SLLQSFRR                                   |
| 59 - 80     | 2323.20  | 2322.20   | 2322.20   | 0.00  | 0 DAGVTLHGDLYDHASLLSAVR                      |
| 81 - 99     | 1958.02  | 1957.02   | 1957.04   | -0.02 | 0 DADVISTLGLAQADQTK                          |
| 114 - 134   | 2311.13  | 2310.13   | 2310.14   | -0.01 | 1 RFLPSEFGLDPDHTGAVEPAR                      |
| 115 - 134   | 2155.02  | 2154.02   | 2154.04   | -0.02 | 0 FLPSEFGLDPDHTGAVEPAR                       |
| 193 - 213   | 2250.15  | 2249.15   | 2249.16   | -0.01 | 0 VVFVEEGDIGTYTLAAVDPR                       |
| 218 - 225   | 898.54   | 897.53    | 897.54    | -0.01 | 0 TVNIRPAK                                   |
| 226 - 239   | 1624.81  | 1623.81   | 1623.83   | -0.02 | 0 NAVSHEELVALWEK                             |
| 226 - 240   | 1752.91  | 1751.91   | 1751.92   | -0.01 | 1 NAVSHEELVALWEKK                            |
| 248 - 257   | 1132.62  | 1131.62   | 1131.62   | -0.00 | 0 VYVPEDAVLK                                 |
| 258 - 279   | 2447.30  | 2446.30   | 2446.32   | -0.02 | 0 QIQESEIPLNIVLSIAHAGYIR Pyro-glu (N-term Q) |
| 258 - 279   | 2464.36  | 2463.35   | 2463.35   | 0.01  | 0 QIQESEIPLNIVLSIAHAGYIR                     |
| 280 - 312   | 3641.78  | 3640.78   | 3640.74   | 0.04  | 0 GETTTPLDPATAVEATQLFPDVQYTTVDDYLNR          |

## Spot 2080

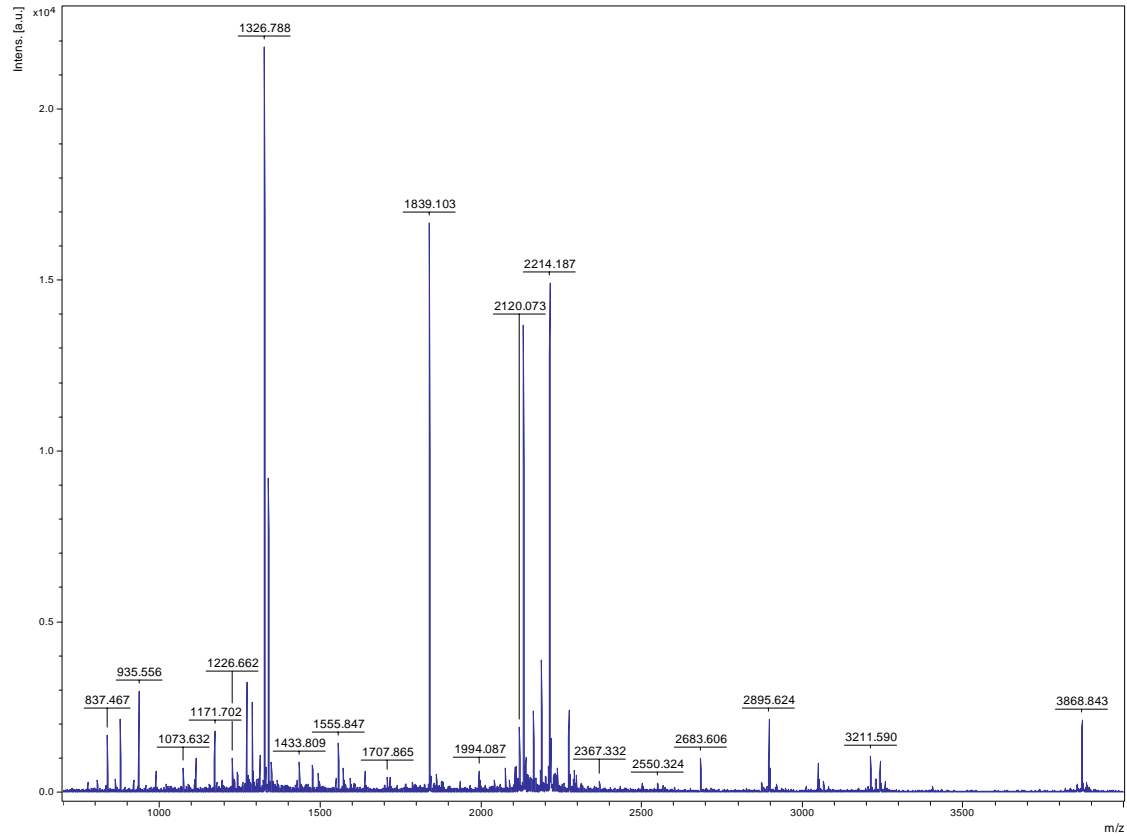

Match to: gi|50899346 Score: 76 Expect: 0.0018

### Matched peptides:

| Start - End | Observed  | Mr (expt) | Mr (calc) | Delta   | Miss Sequence                     |
|-------------|-----------|-----------|-----------|---------|-----------------------------------|
| 29 - 48     | 2041.0172 | 2040.0099 | 2040.0210 | -0.0111 | 1 R.AALPSFGRALSTQTGFASCR.K        |
| 68 - 79     | 1271.6571 | 1270.6498 | 1270.6703 | -0.0205 | 0 R.AMSAQGLPIDLR.G                |
| 68 - 79     | 1287.6590 | 1286.6517 | 1286.6652 | -0.0135 | 0 R.AMSAQGLPIDLR.G Oxidation (M)  |
| 83 - 100    | 1839.0321 | 1838.0248 | 1837.8998 | 0.1250  | 0 R.AFIAGVADDNGYGWAIK.A           |
| 101 - 126   | 2683.4990 | 2682.4917 | 2682.4744 | 0.0173  | 0 K.ALAAAGAEILVGTWVPALNIFETSLR.R  |
| 170 - 179   | 1112.4958 | 1111.4885 | 1111.5298 | -0.0413 | 0 R.YAGSSNWTVK.E                  |
| 180 - 206   | 2895.5190 | 2894.5117 | 2894.5024 | 0.0093  | 1 K.EVAETVRKNDFTDILVHSLANGPEVK.N  |
| 187 - 206   | 2139.1274 | 2138.1201 | 2138.1007 | 0.0194  | 0 K.NDFGTIDILVHSLANGPEVK.N        |
| 256 - 268   | 1225.5741 | 1224.5668 | 1224.5808 | -0.0140 | 0 R.TIPYGGGMSSAK.A                |
| 277 - 284   | 878.3488  | 877.3415  | 877.4657  | -0.1242 | 0 R.VLAYEAGR.K                    |
| 290 - 301   | 1171.6105 | 1170.6032 | 1170.6356 | -0.0324 | 0 R.VNTISAGPLGSR.A                |
| 312 - 324   | 1555.7819 | 1554.7746 | 1554.7752 | -0.0005 | 0 K.MIEYSYVNAPLQK.E               |
| 312 - 324   | 1571.7803 | 1570.7730 | 1570.7701 | 0.0029  | 0 K.MIEYSYVNAPLQK.E Oxidation (M) |

## Spot 2084

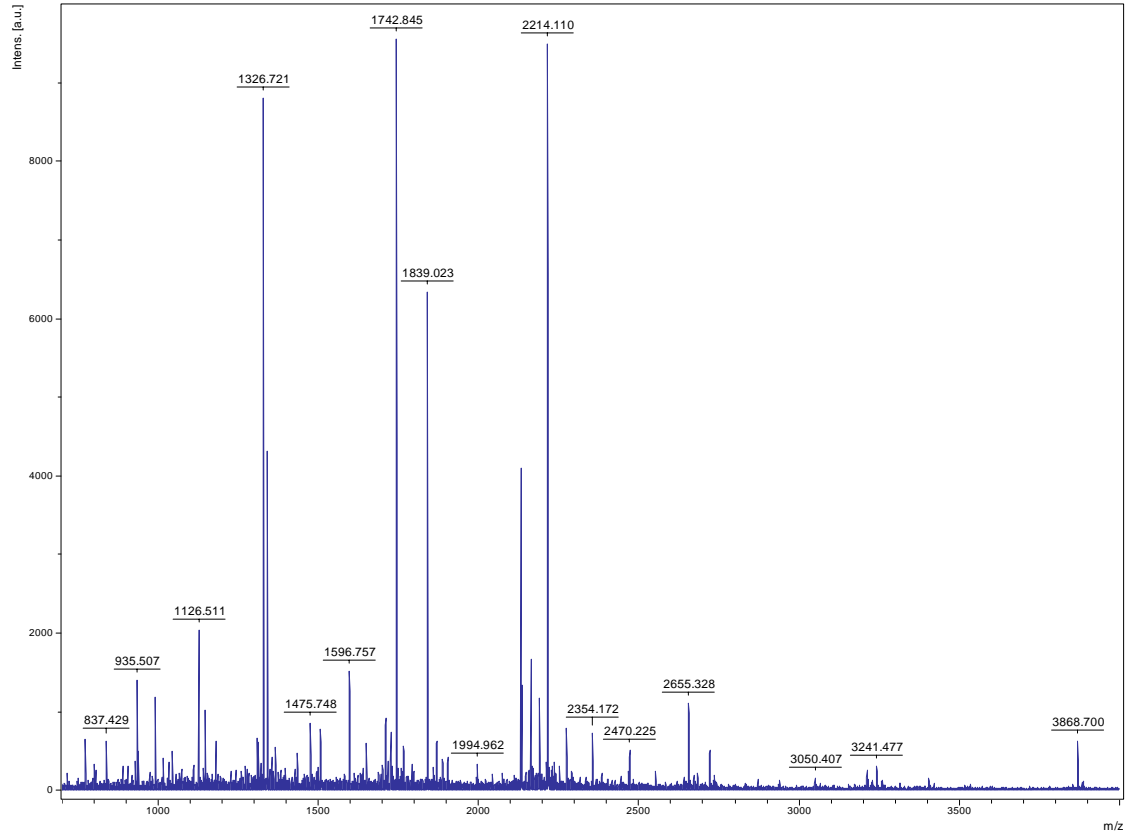

Match to: gi|55733910 Score: 73 Expect: 0.0033

### Matched peptides:

| Start - End | Observed  | Mr (expt) | Mr (calc) | Delta   | Miss Sequence                                          |
|-------------|-----------|-----------|-----------|---------|--------------------------------------------------------|
| 2 - 24      | 2551.2448 | 2550.2375 | 2550.3515 | -0.1140 | 0 M.LFNGLGTAYLIGNMTNLVVEGTR.R Acetyl (N-term)          |
| 63 - 77     | 1742.8688 | 1741.8615 | 1741.8669 | -0.0053 | 0 R.AESLNQQQLMDQLPK.S                                  |
| 78 - 93     | 1868.9327 | 1867.9254 | 1867.9939 | -0.0685 | 1 K.SICKGICEYLFVVK.D Carbamidomethyl (C)               |
| 82 - 99     | 2188.1031 | 2187.0958 | 2187.1689 | -0.0731 | 1 K.GICEYLFVVKD.VYLFK.G Acetyl (N-term)                |
| 182 - 190   | 1145.6222 | 1144.6149 | 1144.6386 | -0.0237 | 1 R.TRTLCQLL.L Acetyl (N-term)                         |
| 287 - 297   | 1308.6766 | 1307.6693 | 1307.6795 | -0.0101 | 0 K.GYEDCVLVLK.Q Carbamidomethyl (C)                   |
| 287 - 305   | 2236.1008 | 2235.0935 | 2235.1391 | -0.0456 | 1 K.GYEDCVLVLKQACNVNIK.D 2 Carbamidomethyl (C)         |
| 324 - 350   | 3049.4696 | 3048.4623 | 3048.5868 | -0.1244 | 1 K.IFNILYHFARVSSPHHAAGDLLCLAAAR.R Carbamidomethyl (C) |
| 352 - 362   | 1272.6624 | 1271.6551 | 1271.7085 | -0.0534 | 1 R.GDLDTLRELLK.H                                      |
| 426 - 449   | 2470.2381 | 2469.2308 | 2469.3703 | -0.1395 | 1 K.TRELHPVTIVVDSPPAAAIVIRE                            |
| 450 - 458   | 935.4346  | 934.4273  | 934.3992  | 0.0282  | 0 R.EVGSSGDSR.N Acetyl (N-term)                        |
| 518 - 536   | 2132.0103 | 2131.0030 | 2131.0830 | -0.0800 | 1 R.KTLMNDEGAEIDSIVIR.D                                |
| 537 - 561   | 2683.3599 | 2682.3526 | 2682.2152 | 0.1374  | 1 R.DNDKLFIVTEEHMTAVASMDSVSGS.-                        |

### Spot 2087

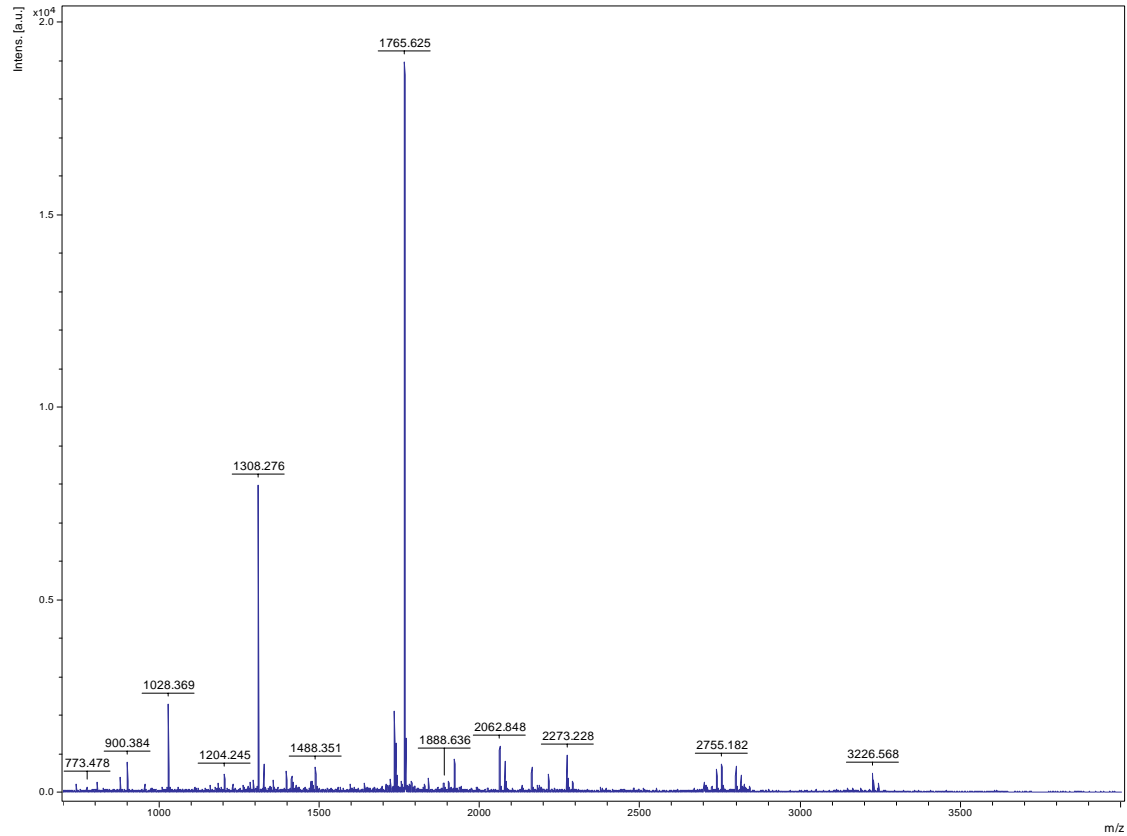

Match to: gi|55168333 Score: 78 Expect: 0.00096

#### Matched peptides:

| Start - End | Observed  | Mr (expt) | Mr (calc) | Delta   | Miss Sequence                    |
|-------------|-----------|-----------|-----------|---------|----------------------------------|
| 43 - 60     | 1733.8308 | 1732.8235 | 1732.8995 | -0.0760 | 0 K.LSLNAGGLALPSFSDSGK.V         |
| 126 - 151   | 2738.4335 | 2737.4262 | 2737.3169 | 0.1093  | 0 K.AGQFTNMQLTGATGIFTGFSTEFVGR.A |
| 177 - 189   | 1355.5036 | 1354.4963 | 1354.6841 | -0.1877 | 1 K.SGQKLPEPSAADR.E              |
| 211 - 223   | 1397.6378 | 1396.6305 | 1396.8111 | -0.1806 | 0 R.VVVLNTANLPMVK.E              |
| 258 - 270   | 1229.4708 | 1228.4635 | 1228.6523 | -0.1888 | 1 R.GSGRVQVVGADGK.R              |
| 271 - 287   | 1922.0039 | 1920.9966 | 1921.0533 | -0.0567 | 1 K.RVLDTHVEGGNLFIVPR.F          |
| 325 - 343   | 2062.9803 | 2061.9730 | 2061.9928 | -0.0198 | 0 K.AISPEVLEASFNATPEMEKL         |
| 349 - 359   | 1308.4754 | 1307.4681 | 1307.6510 | -0.1828 | 1 K.RIDSEIFFAPN.-                |



Spot 2088

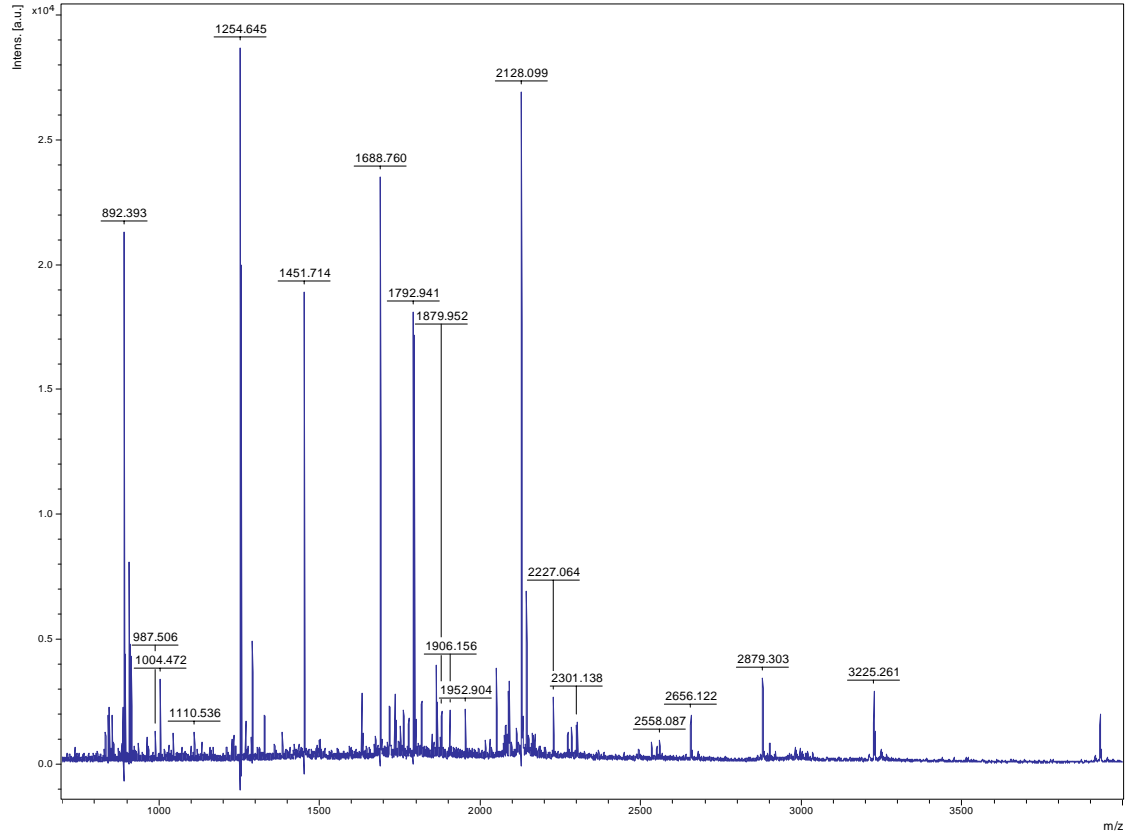

Match to: gi|50940457 Score: 68 Expect: 0.01

Matched peptides:

| Start - End | Observed  | Mr (expt) | Mr (calc) | Delta   | Miss Sequence                                               |
|-------------|-----------|-----------|-----------|---------|-------------------------------------------------------------|
| 62 - 71     | 922.4042  | 921.3969  | 921.4919  | -0.0950 | 0 K.LGGSSAFVGK.F                                            |
| 103 - 111   | 963.5481  | 962.5408  | 962.5800  | -0.0392 | 0 R.TALAFVTLK.S                                             |
| 117 - 122   | 892.3440  | 891.3367  | 891.3949  | -0.0581 | 0 R.EFMFYR.N                                                |
| 117 - 141   | 3033.4700 | 3032.4627 | 3032.4623 | -0.0005 | 1 R.EFMFYRNPADMLL <del>TEAELNLDLIR</del> .R 2 Oxidation (M) |
| 123 - 142   | 2300.2743 | 2299.2670 | 2299.1841 | 0.0829  | 1 R.NPSADMLL <del>TEAELNLDLIR</del> .A Oxidation (M)        |
| 145 - 159   | 1735.9686 | 1734.9613 | 1734.8763 | 0.0850  | 0 K.IFHYGSISLITEPCR.S                                       |
| 160 - 167   | 858.3421  | 857.3348  | 857.4177  | -0.0829 | 0 R.SAHVAAMR.A Oxidation (M)                                |
| 171 - 183   | 1394.7604 | 1393.7531 | 1393.6660 | 0.0872  | 0 K.SAGILCSYDPNVR.L                                         |
| 171 - 183   | 1436.7087 | 1435.7014 | 1435.6765 | 0.0249  | 0 K.SAGILCSYDPNVR.L Acetyl (N-term)                         |
| 171 - 183   | 1451.7828 | 1450.7755 | 1450.6874 | 0.0881  | 0 K.SAGILCSYDPNVR.L Carbamidomethyl (C)                     |
| 195 - 202   | 887.4470  | 886.4397  | 886.5276  | -0.0879 | 0 R.AGILSIWK.E                                              |
| 195 - 208   | 1632.9163 | 1631.9090 | 1631.8922 | 0.0168  | 1 R.AGILSIWK <del>EADFIK</del> .V Acetyl (N-term)           |
| 203 - 226   | 2656.2962 | 2655.2889 | 2655.2187 | 0.0702  | 1 K.EADFIK <del>VSDDEVAFLTQGDANDEK</del> .N                 |
| 209 - 237   | 3225.5380 | 3224.5307 | 3224.5513 | -0.0205 | 1 K.VSDDEVAFLTQGDANDEK <del>NVLSLWFDGLK</del> .L            |
| 227 - 237   | 1291.7535 | 1290.7462 | 1290.6972 | 0.0491  | 0 K.NVLSLWFDGLK.L                                           |
| 238 - 246   | 987.5222  | 986.5149  | 986.5648  | -0.0498 | 0 K.LLIVTDGEK.G                                             |
| 238 - 249   | 1360.7566 | 1359.7493 | 1359.7180 | 0.0313  | 1 K.LLIVTDGEK <del>GCR</del> .Y Carbamidomethyl (C)         |
| 257 - 286   | 2879.5135 | 2878.5062 | 2878.4711 | 0.0351  | 0 K.GSVPGFVNTVDTT <del>GAGDAFVGSLLVN</del> VAK.D            |
| 316 - 336   | 2034.1340 | 2033.1267 | 2033.1520 | -0.0253 | 1 K.GAIPALPTVAVAQELISKAAN.-                                 |

## Spot 2090

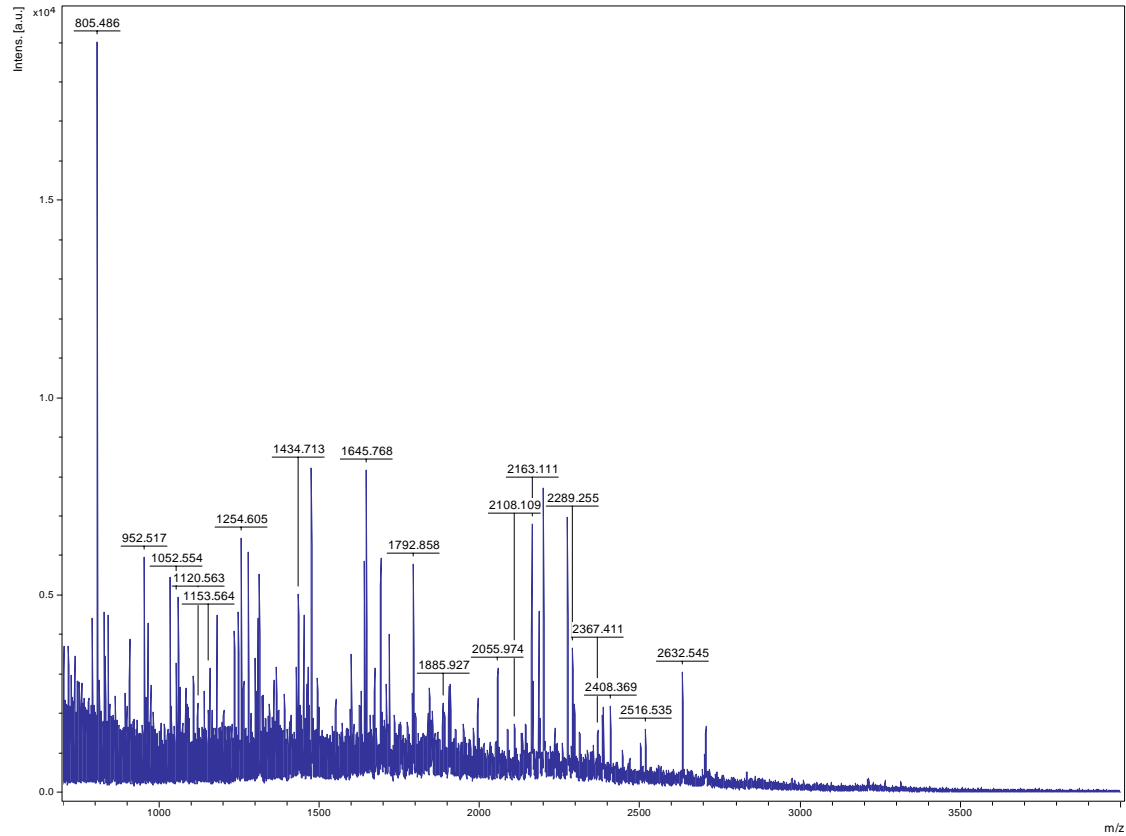

Match to: gi|15823775; Score: 97

### Matched peptides:

| Start - End | Observed | Mr (expt) | Mr (calc) | Delta | Miss Sequence                         |
|-------------|----------|-----------|-----------|-------|---------------------------------------|
| 28 - 36     | 965.56   | 964.56    | 964.53    | 0.02  | 0 SGFISLVSR                           |
| 86 - 106    | 2163.11  | 2162.11   | 2162.08   | 0.03  | 1 LNGGLGTTMGCTGPKSVIEVR Oxidation (M) |
| 151 - 168   | 2198.08  | 2197.08   | 2197.02   | 0.06  | 0 YSNSNIEHTFNQSQYPR                   |
| 186 - 205   | 2144.04  | 2143.04   | 2142.98   | 0.06  | 0 DGWYPPGHGDVFPPLNNSGK                |
| 206 - 214   | 958.57   | 957.57    | 957.55    | 0.02  | 0 LDTLLAQGK                           |
| 258 - 267   | 1052.55  | 1051.55   | 1051.53   | 0.02  | 0 GGTLLSYEGR                          |
| 268 - 285   | 2108.11  | 2107.11   | 2107.09   | 0.01  | 0 VQLEIAQVPDEHVNEFK                   |
| 330 - 342   | 1312.69  | 1311.69   | 1311.75   | -0.06 | 0 VLQLETAAGAAIR                       |
| 343 - 354   | 1390.66  | 1389.66   | 1389.78   | -0.12 | 1 FFEKAIGINVPR                        |
| 347 - 354   | 839.56   | 838.56    | 838.50    | 0.06  | 0 AIGINVPR                            |
| 347 - 356   | 1082.59  | 1081.59   | 1081.64   | -0.05 | 1 AIGINVPRSR                          |
| 388 - 402   | 1629.74  | 1628.74   | 1628.80   | -0.07 | 0 TNPSNPSIELGPEFK                     |
| 425 - 438   | 1451.64  | 1450.64   | 1450.75   | -0.10 | 0 VSGDVVFGSGVTLK                      |

## Spot 2093

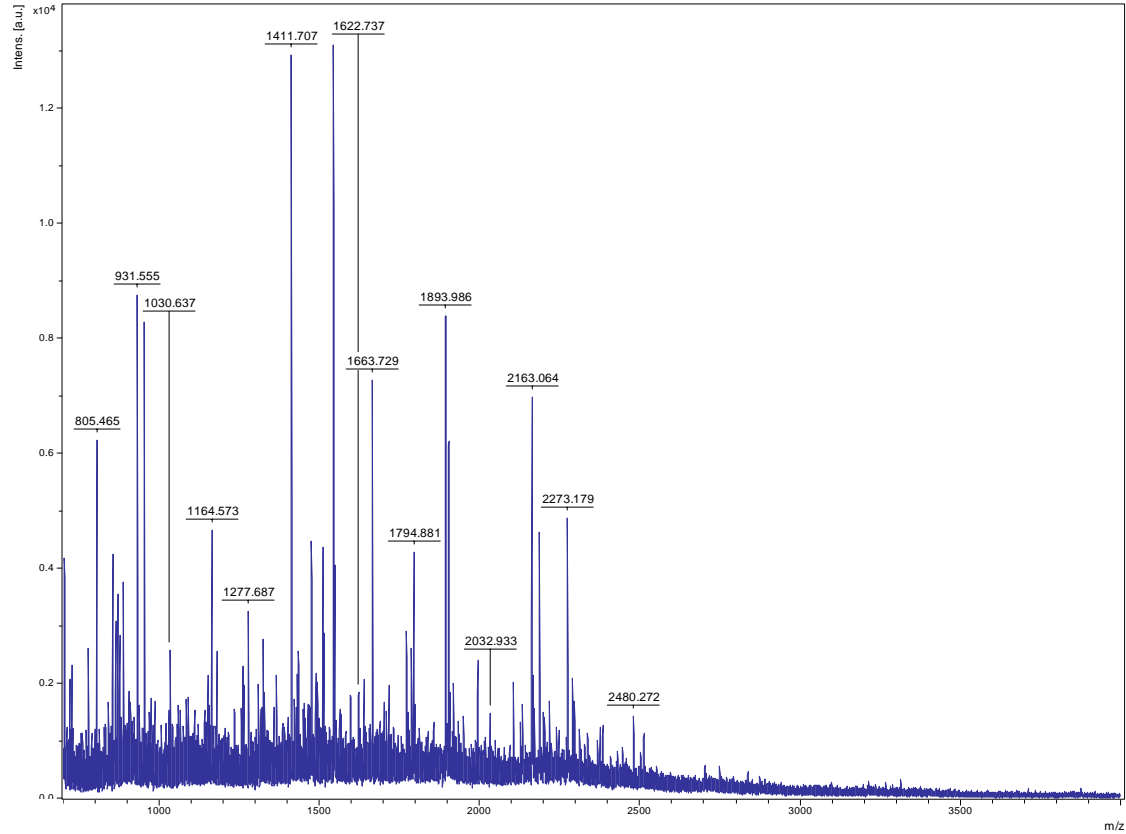

Match to: gi|34899936; Score: 92

### Matched peptides:

| Start - End | Observed | Mr (expt) | Mr (calc) | Delta | Miss Sequence                    |
|-------------|----------|-----------|-----------|-------|----------------------------------|
| 6 - 12      | 876.48   | 875.47    | 875.42    | 0.06  | 0 VVVDECR                        |
| 13 - 25     | 1411.71  | 1410.70   | 1410.71   | -0.01 | 0 GVLVYSDGAVER                   |
| 27 - 36     | 986.57   | 985.57    | 985.53    | 0.03  | 0 AAPGFATPVR                     |
| 27 - 44     | 1902.93  | 1901.93   | 1901.93   | 0.00  | 1 AAPGFATPVRDDGSVEWK             |
| 45 - 52     | 864.47   | 863.46    | 863.41    | 0.05  | 0 DAVFDAAR                       |
| 86 - 96     | 1511.66  | 1510.65   | 1510.64   | 0.01  | 0 TWPNCQNYCLR                    |
| 97 - 111    | 1543.83  | 1542.83   | 1542.84   | -0.01 | 0 LAELGAVVVPDYR                  |
| 153 - 171   | 1893.99  | 1892.98   | 1892.99   | -0.00 | 0 VFVSGDSAGGTIAHHLAVR            |
| 186 - 201   | 1769.89  | 1768.89   | 1768.90   | -0.01 | 0 VAGYVQLMPFFGGVER               |
| 186 - 201   | 1785.88  | 1784.87   | 1784.89   | -0.02 | 0 VAGYVQLMPFFGGVER Oxidation (M) |
| 202 - 216   | 1663.73  | 1662.73   | 1662.73   | -0.00 | 0 TPSEAACPDDAFLNR                |
| 316 - 327   | 1164.57  | 1163.57   | 1163.56   | 0.01  | 0 LFVDTDGGGGAR                   |

# Spot 2095

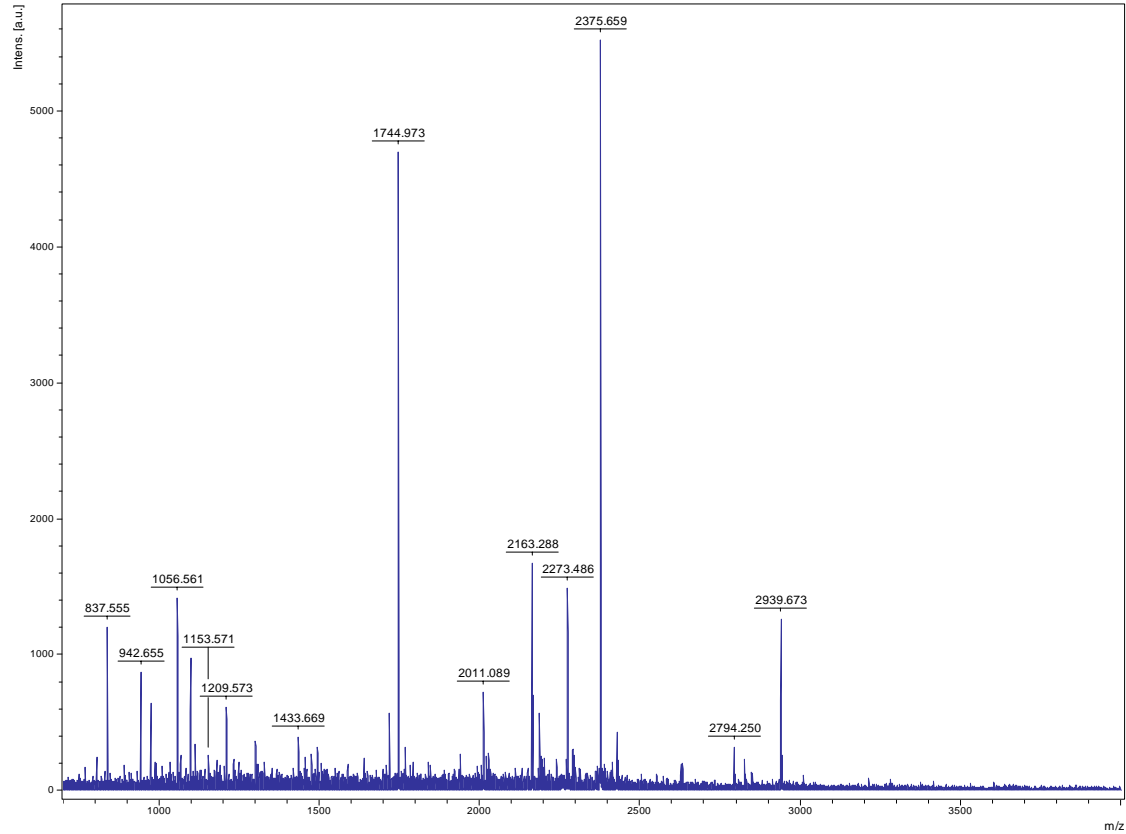

Match to: gi|51979438 Score: 106

## Matched peptides:

| Start - End | Observed  | Mr (expt) | Mr (calc) | Delta   | Miss Sequence                        |
|-------------|-----------|-----------|-----------|---------|--------------------------------------|
| 9 - 18      | 1056.5612 | 1055.5539 | 1055.5247 | 0.0292  | 0 R.AGGPEVLEER.D                     |
| 185 - 195   | 1209.5729 | 1208.5656 | 1208.5859 | -0.0203 | 0 K.GLGADVCIYK.T Carbamidomethyl (C) |
| 211 - 226   | 1744.9725 | 1743.9653 | 1743.9519 | 0.0134  | 0 K.GVDVILDNIGGLYLQR.N               |
| 227 - 236   | 1058.5854 | 1057.5782 | 1057.5516 | 0.0266  | 0 R.NLNSLAVDGR.L                     |
| 259 - 268   | 1098.6499 | 1097.6426 | 1097.6669 | -0.0243 | 1 R.RLTIQAAGLR.N                     |
| 260 - 268   | 942.6548  | 941.6476  | 941.5658  | 0.0818  | 0 R.LTIQAAGLR.N                      |
| 276 - 284   | 987.6197  | 986.6124  | 986.5648  | 0.0477  | 0 K.ALIVSEVEK.N                      |
| 285 - 294   | 1097.6067 | 1096.5994 | 1096.6029 | -0.0035 | 0 K.NVWPAVVQ GK.V                    |

## Spot 2098

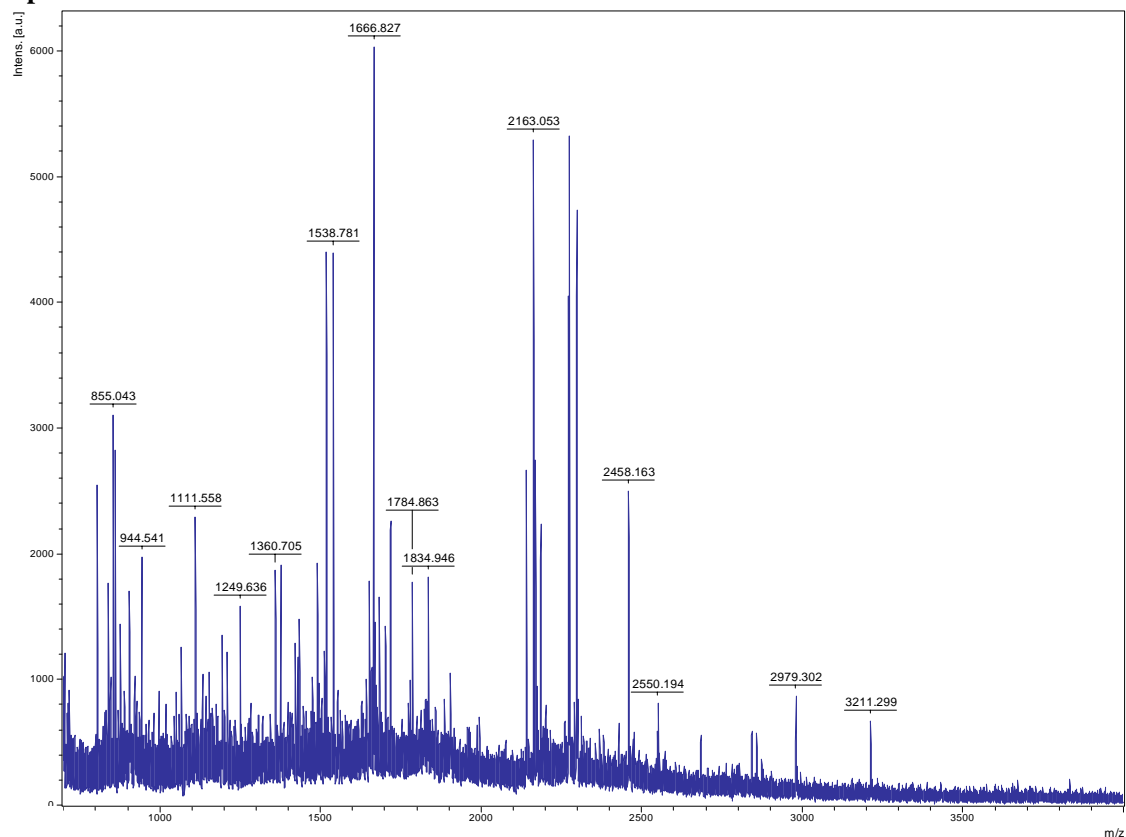

Match to: gi|62732953 Score: 127 Expect: 1.3e-08

### Matched peptides:

| Start - End | Observed  | Mr (expt) | Mr (calc) | Delta   | Miss Sequence                                        |
|-------------|-----------|-----------|-----------|---------|------------------------------------------------------|
| 48 - 57     | 1001.5607 | 1000.5534 | 1000.5665 | -0.0131 | 1 K.TAKTIASPGR.G                                     |
| 72 - 85     | 1543.8335 | 1542.8262 | 1542.8114 | 0.0149  | 1 K.RLASIGLENTEANR.Q                                 |
| 73 - 85     | 1387.7412 | 1386.7339 | 1386.7103 | 0.0237  | 0 R.LASIGLENTEANR.Q                                  |
| 122 - 130   | 1058.6017 | 1057.5944 | 1057.6019 | -0.0075 | 0 K.IVDILTEQKI                                       |
| 137 - 162   | 2743.2471 | 2742.2398 | 2742.3394 | -0.0996 | 1 K.VDKGLVPLAGSNNESWCQGLDGLASR.E Carbamidomethyl (C) |
| 140 - 162   | 2401.1066 | 2400.0993 | 2400.1491 | -0.0498 | 0 K.GLVPLAGSNNESWCQGLDGLASR.E Carbamidomethyl (C)    |
| 163 - 172   | 1156.5537 | 1155.5464 | 1155.5308 | 0.0156  | 0 R.EAAYYQQGAR.F                                     |
| 178 - 192   | 1510.8670 | 1509.8597 | 1509.8402 | 0.0195  | 0 R.TVVSIPNGPSELAVK.E                                |
| 193 - 200   | 873.4478  | 872.4405  | 872.4504  | -0.0099 | 0 K.EAAWGLAR.Y                                       |
| 201 - 228   | 3033.4121 | 3032.4048 | 3032.5454 | -0.1406 | 0 R.YAAISQDNLVPIVEPELLDGEHGIDR.T                     |
| 229 - 235   | 822.3985  | 821.3912  | 821.4283  | -0.0371 | 0 R.TFEVAQK.V                                        |
| 271 - 282   | 1351.6951 | 1350.6878 | 1350.6667 | 0.0211  | 0 R.ATPEQVSDYTLK.L                                   |
| 338 - 347   | 1115.5672 | 1114.5599 | 1114.5407 | 0.0192  | 0 K.TWGGQPENVK.A                                     |
| 348 - 356   | 970.5682  | 969.5609  | 969.5607  | 0.0002  | 0 K.AAQDALLR.A                                       |

Match to: gi|50944223 Score: 106 Expect: 1.7e-06

### Matched peptides:

| Start - End | Observed  | Mr (expt) | Mr (calc) | Delta   | Miss Sequence                       |
|-------------|-----------|-----------|-----------|---------|-------------------------------------|
| 68 - 83     | 1673.8475 | 1672.8402 | 1672.8090 | 0.0312  | 0 R.AMSSEGPQGLPIDLR.G Oxidation (M) |
| 86 - 104    | 1995.0362 | 1994.0289 | 1994.0009 | 0.0280  | 1 K.RAFIAGVADDNGYGWAIK.A            |
| 87 - 104    | 1838.9297 | 1837.9224 | 1837.8998 | 0.0226  | 0 R.AFIAGVADDNGYGWAIK.A             |
| 105 - 130   | 2683.3891 | 2682.3818 | 2682.4744 | -0.0926 | 0 K.ALAAAGAEILVGTWVPALNIFETSLR.R    |
| 139 - 150   | 1345.7561 | 1344.7488 | 1344.7322 | 0.0166  | 1 K.KLPDGLMEIVK.V Oxidation (M)     |
| 151 - 169   | 2150.0388 | 2149.0315 | 2149.0102 | 0.0213  | 0 K.VYPLDAVYDSPEDVPEDVK.G           |
| 151 - 172   | 2449.1673 | 2448.1600 | 2448.1696 | -0.0095 | 1 K.VYPLDAVYDSPEDVPEDVKGK.R         |
| 174 - 183   | 1112.5711 | 1111.5638 | 1111.5298 | 0.0340  | 0 R.YAGSSNWTVK.E                    |
| 191 - 218   | 3022.4000 | 3021.3927 | 3021.5770 | -0.1843 | 0 K.NDFGSIDILVHSLANGPEVTKPLETSLR.R  |
| 281 - 288   | 862.4511  | 861.4438  | 861.4708  | -0.0270 | 0 K.VLAFEAGR.K                      |
| 294 - 305   | 1171.6602 | 1170.6529 | 1170.6356 | 0.0173  | 0 R.VNTISAGPLGSR.A                  |
| 316 - 328   | 1555.7901 | 1554.7828 | 1554.7752 | 0.0077  | 0 K.MIEYSYVNAPLQK.E                 |
| 316 - 328   | 1571.7881 | 1570.7808 | 1570.7701 | 0.0107  | 0 K.MIEYSYVNAPLQK.E Oxidation (M)   |

# Spot 2099

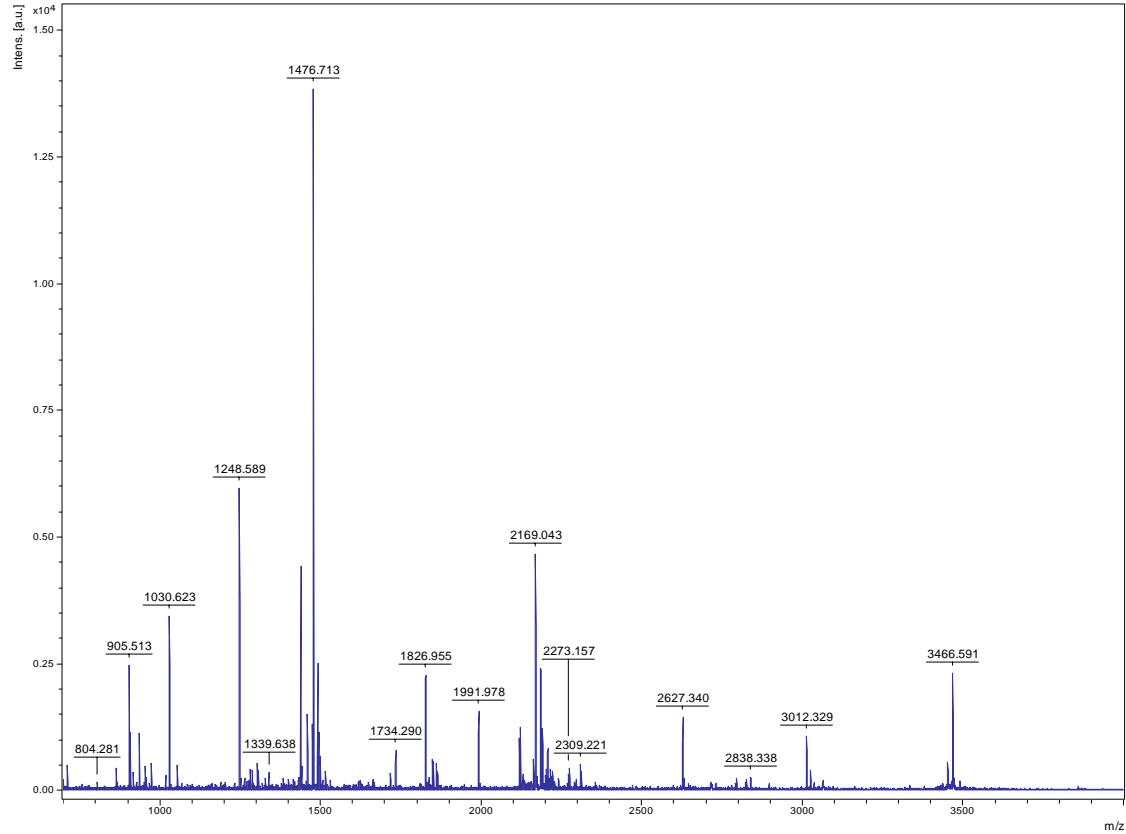

Match to: gi|62733213 Score: 96 Expect: 1.5e-05

## Matched peptides:

| Start - End | Observed  | Mr (expt) | Mr (calc) | Delta   | Miss Sequence                           |
|-------------|-----------|-----------|-----------|---------|-----------------------------------------|
| 54 - 69     | 1859.9749 | 1858.9676 | 1858.9366 | 0.0311  | 0 R.YTTVIITFYNAFGHGR.Y                  |
| 70 - 87     | 1826.9766 | 1825.9693 | 1825.9574 | 0.0120  | 0 R.YSLDISGHPLAAVGADIK.H                |
| 132 - 164   | 3466.4602 | 3465.4529 | 3465.5861 | -0.1331 | 0 R.AGVARPFQDDAAVDGIDFFIDQGGADHYDDLAR.R |
| 177 - 186   | 1030.5871 | 1029.5798 | 1029.6182 | -0.0384 | 0 R.VGVLLTATTR.C                        |
| 197 - 205   | 905.4267  | 904.4194  | 904.5130  | -0.0936 | 0 K.ALATGVFAR.I                         |
| 222 - 226   | 712.1562  | 711.1489  | 711.3228  | -0.1738 | 0 R.YSWEK.W                             |
| 227 - 235   | 934.4008  | 933.3935  | 933.4708  | -0.0773 | 0 K.WAAAFPGSK.V                         |
| 236 - 254   | 2169.0368 | 2168.0295 | 2168.0612 | -0.0316 | 0 K.VYIGLVASPEQDSAWMFQK.D               |
| 255 - 265   | 1476.7410 | 1475.7337 | 1475.7118 | 0.0219  | 0 K.DLYYEMLQFVR.S                       |
| 266 - 282   | 1991.9900 | 1990.9827 | 1990.9788 | 0.0039  | 1 R.SLPNYGGLAIYDRYFDK.K                 |

## Spot 2101

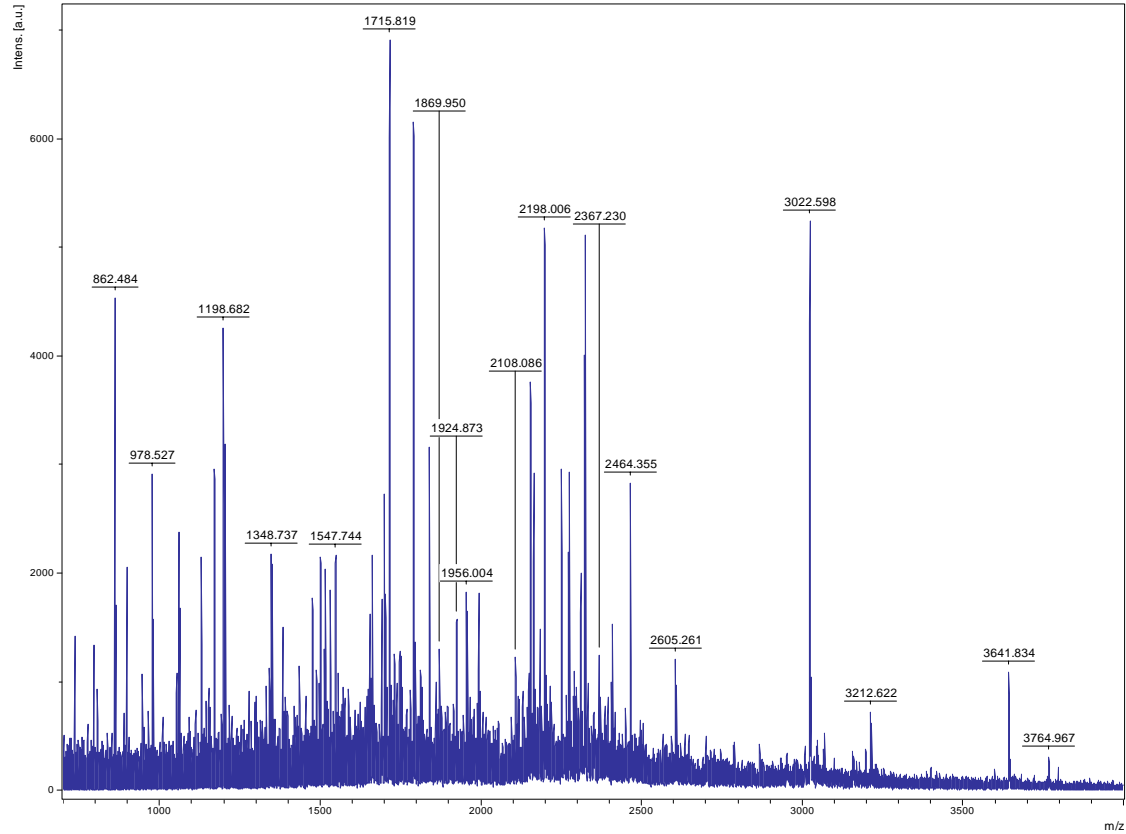

Match to: gi|34894098; Score: 105

### Matched peptides:

| Start - End | Observed | Mr (expt) | Mr (calc) | Delta | Miss Sequence                                    |
|-------------|----------|-----------|-----------|-------|--------------------------------------------------|
| 2 - 9       | 805.43   | 804.42    | 804.40    | 0.03  | 1 ASGEEKK                                        |
| 12 - 23     | 1204.69  | 1203.69   | 1203.70   | -0.01 | 0 ILVGGTG <sup>Y</sup> IGR                       |
| 51 - 58     | 978.53   | 977.52    | 977.53    | -0.01 | 0 SLLQ <sup>S</sup> FR                           |
| 59 - 80     | 2323.19  | 2322.18   | 2322.20   | -0.01 | 0 DAGVTLLHGDL <sup>Y</sup> DHASLLSAVR            |
| 114 - 134   | 2311.12  | 2310.11   | 2310.14   | -0.03 | 1 RFLPSEFGLDPDHTGAVEPAR                          |
| 115 - 134   | 2155.03  | 2154.03   | 2154.04   | -0.01 | 0 FLPSEFGLDPDHTGAVEPAR                           |
| 193 - 213   | 2250.15  | 2249.15   | 2249.16   | -0.01 | 0 VVFVEEGDIGTYTLAAVDPR                           |
| 218 - 225   | 898.55   | 897.54    | 897.54    | 0.00  | 0 TVNIRPAK                                       |
| 245 - 257   | 1530.76  | 1529.76   | 1529.85   | -0.09 | 1 LERVYVPEDAVLK                                  |
| 258 - 279   | 2464.35  | 2463.35   | 2463.35   | 0.00  | 0 QIQESEIPLNIVLSIAHAGYIR                         |
| 280 - 312   | 3641.83  | 3640.83   | 3640.74   | 0.09  | 0 GETTTPLDPATAVEATQLFPDVQ <sup>Y</sup> TTVDDYLNR |

## Spot 2102

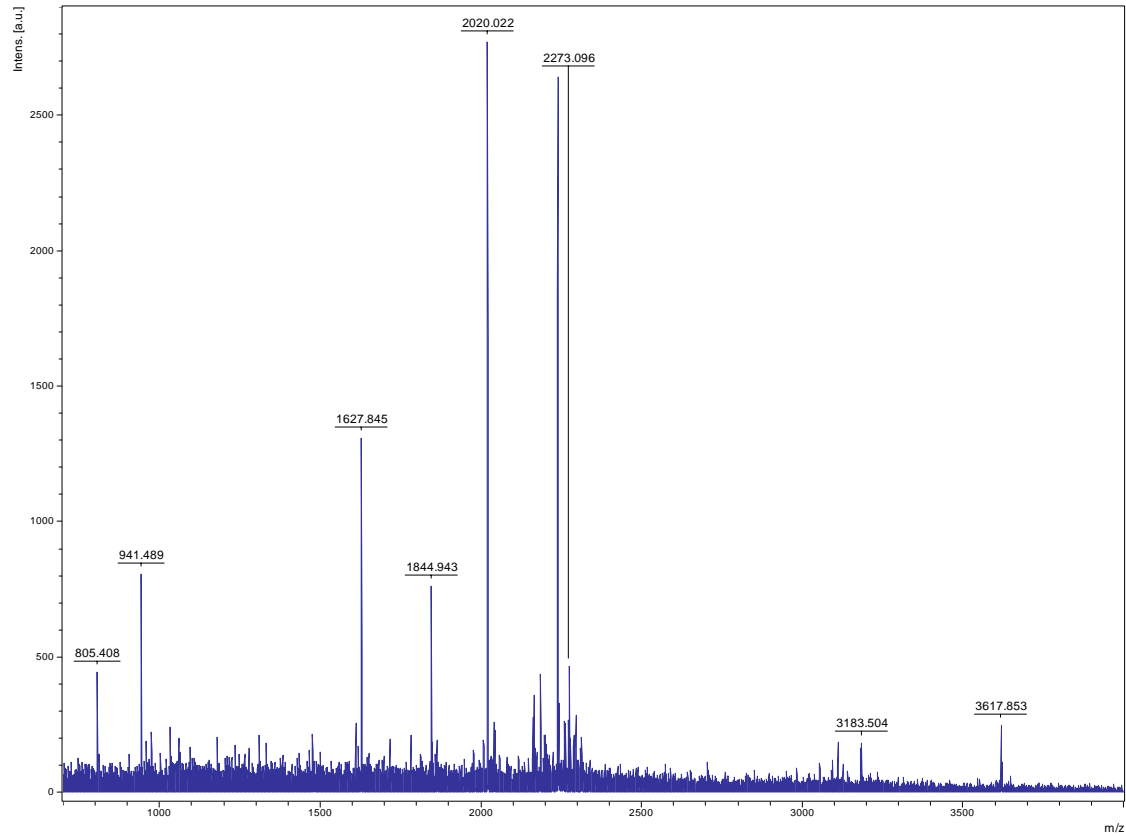

Match to: gi|51963422; Score: 72

### Matched peptides:

| Start - End | Observed | Mr (expt) | Mr (calc) | Delta | Miss Sequence                        |
|-------------|----------|-----------|-----------|-------|--------------------------------------|
| 54 - 72     | 2020.02  | 2019.02   | 2019.05   | -0.03 | 0 ATNPTLAPAHLQDLPGFTR                |
| 169 - 184   | 1844.94  | 1843.94   | 1843.97   | -0.03 | 0 HSVISDEVTTLVIFER                   |
| 186 - 217   | 3617.85  | 3616.85   | 3616.83   | -0.02 | 1 YTTIEGYHPDLIVGSTDKQPLLETPGEVFEEL   |
| 204 - 217   | 1610.77  | 1609.76   | 1609.84   | -0.07 | 0 QPLLETPGEVFEEL Pyro-glu (N-term Q) |
| 204 - 217   | 1627.84  | 1626.84   | 1626.86   | -0.02 | 0 QPLLETPGEVFEEL                     |
| 302 - 309   | 941.49   | 940.49    | 940.50    | -0.01 | 1 DVNRDPLI                           |



# Spot 2105

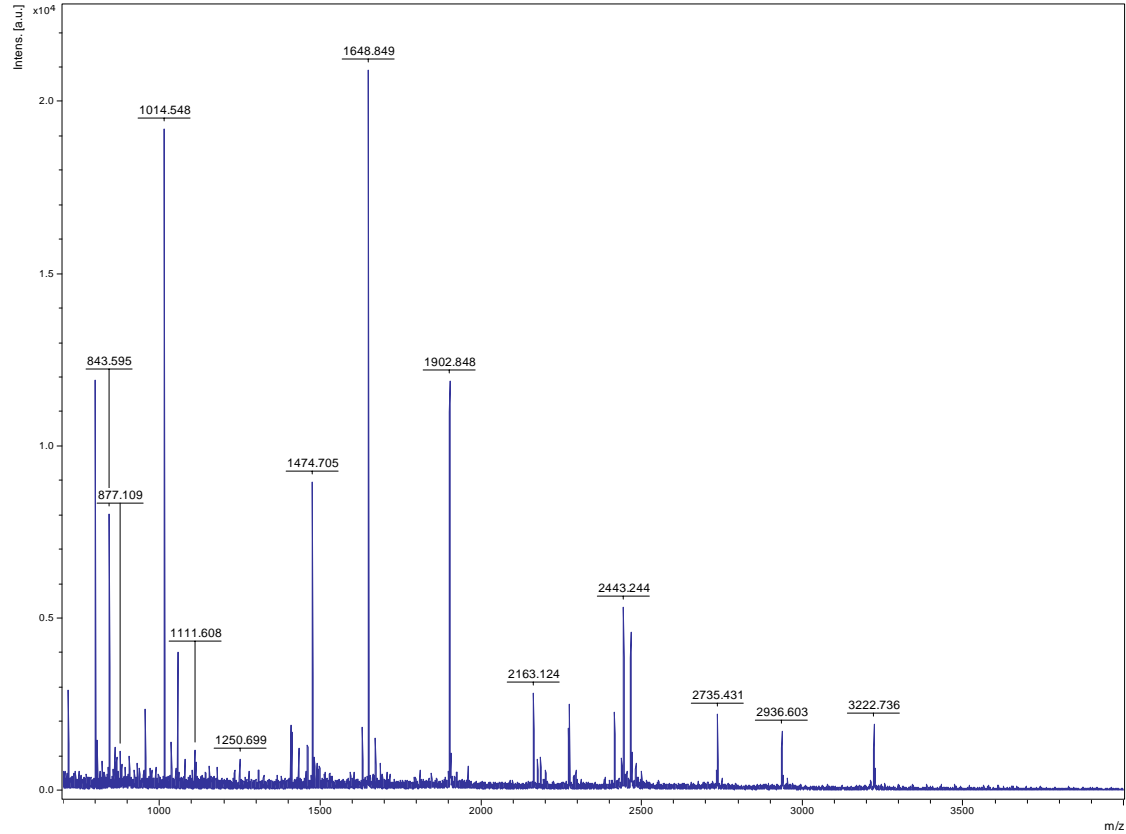

Match to: gi|37535166 Score: 214 Expect: 2.7e-17

## Matched peptides:

| Start - End | Observed  | Mr (expt) | Mr (calc) | Delta   | Miss Sequence                             |
|-------------|-----------|-----------|-----------|---------|-------------------------------------------|
| 18 - 24     | 799.3763  | 798.3690  | 798.3660  | 0.0030  | 0 K.GADSFRR.T                             |
| 43 - 49     | 843.5381  | 842.5308  | 842.5225  | 0.0083  | 0 K.TILELVR.S                             |
| 50 - 64     | 1902.8361 | 1901.8288 | 1901.7791 | 0.0497  | 0 R.SYDGDHICYDHFAFR.T Carbamidomethyl (C) |
| 65 - 74     | 1056.5882 | 1055.5809 | 1055.5287 | 0.0522  | 0 R.TFGVDGYGIK.S                          |
| 75 - 88     | 1648.8456 | 1647.8383 | 1647.7932 | 0.0451  | 0 K.SLAEFFTFDFGVVPR.E                     |
| 75 - 92     | 2176.0842 | 2175.0769 | 2175.0636 | 0.0133  | 1 K.SLAEFFTFDFGVVPRELR.F                  |
| 98 - 122    | 2735.3304 | 2734.3231 | 2734.3867 | -0.0635 | 1 K.LRALWFSPPPTNDGYTGTGVYGPLPR.I          |
| 100 - 122   | 2466.2574 | 2465.2501 | 2465.2015 | 0.0486  | 0 R.ALWFSPPPTNDGYTGTGVYGPLPR.I            |
| 123 - 143   | 2415.2959 | 2414.2886 | 2414.2944 | -0.0058 | 0 R.IFISELLVDELSPQSDIIQK.Y                |
| 154 - 179   | 2936.4758 | 2935.4685 | 2935.4715 | -0.0030 | 0 K.HATLASTSGELTWEKPIYSDFQVLSR.E          |
| 204 - 209   | 716.4079  | 715.4006  | 715.4228  | -0.0222 | 0 R.LISDIR.S                              |
| 217 - 224   | 955.4879  | 954.4806  | 954.4446  | 0.0360  | 0 K.FVEDNGFKL                             |
| 265 - 272   | 1014.5323 | 1013.5250 | 1013.4818 | 0.0433  | 0 R.SYIEFAER.L                            |
| 280 - 291   | 1474.7173 | 1473.7100 | 1473.6596 | 0.0504  | 0 K.DLPNDEVNEHHR.R                        |
| 280 - 292   | 1630.8279 | 1629.8206 | 1629.7607 | 0.0599  | 1 K.DLPNDEVNEHHR.D                        |
| 293 - 314   | 2443.1592 | 2442.1519 | 2442.1298 | 0.0221  | 1 R.DGFEVGNADKIFESTSNDQLTR.R              |
| 303 - 314   | 1410.7268 | 1409.7195 | 1409.6787 | 0.0409  | 0 K.IFESTSNDQLTR.R                        |

## Spot 2108

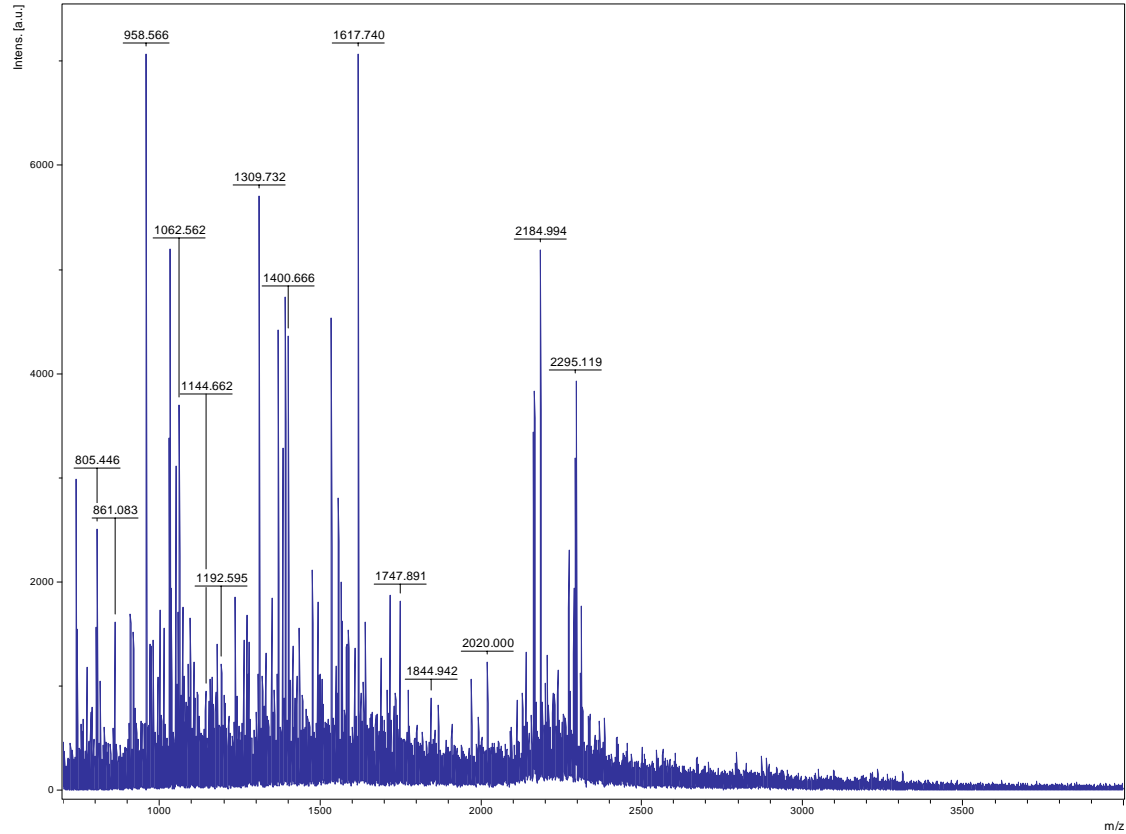

Match to: [gi|51535089](#); Score: 186

### Matched peptides:

| Start - End | Observed | Mr (expt) | Mr (calc) | Delta | Miss Sequence                   |
|-------------|----------|-----------|-----------|-------|---------------------------------|
| 51 - 63     | 1556.77  | 1555.77   | 1555.76   | 0.01  | 1 RAYADTYGEELLR                 |
| 52 - 63     | 1400.67  | 1399.66   | 1399.66   | 0.00  | 0 AYADTYGEELLR                  |
| 64 - 75     | 1368.61  | 1367.61   | 1367.62   | -0.01 | 0 SITDEISGDFER                  |
| 88 - 97     | 1057.58  | 1056.58   | 1056.56   | 0.03  | 0 DAVLANEVAR                    |
| 98 - 106    | 1037.53  | 1036.53   | 1036.51   | 0.02  | 1 KWYPGSGSR                     |
| 99 - 106    | 909.46   | 908.46    | 908.41    | 0.04  | 0 WYPGSGSR                      |
| 107 - 115   | 1030.58  | 1029.58   | 1029.56   | 0.01  | 0 VLVEIACAR                     |
| 116 - 124   | 958.57   | 957.56    | 957.54    | 0.02  | 0 GPAQLFAVR                     |
| 125 - 130   | 803.41   | 802.41    | 802.37    | 0.03  | 0 QAYHER                        |
| 133 - 148   | 1773.87  | 1772.87   | 1772.84   | 0.02  | 1 RSLEEDVAAHATGDFR              |
| 134 - 148   | 1617.74  | 1616.74   | 1616.74   | -0.01 | 0 SLEEDVAAHATGDFR               |
| 150 - 159   | 1144.66  | 1143.66   | 1143.70   | -0.04 | 0 LLVPLISAYR                    |
| 185 - 193   | 1051.52  | 1050.52   | 1050.50   | 0.02  | 0 AYGDDEIIR                     |
| 210 - 220   | 1349.61  | 1348.61   | 1348.60   | 0.01  | 0 YNDEYGHPIK                    |
| 224 - 235   | 1391.70  | 1390.70   | 1390.71   | -0.01 | 1 ADPKDEFSTLRL                  |
| 228 - 235   | 980.52   | 979.52    | 979.50    | 0.02  | 0 DEFLSTLR                      |
| 240 - 246   | 1014.37  | 1013.37   | 1013.35   | 0.02  | 0 CFCCPDR                       |
| 240 - 250   | 1581.61  | 1580.61   | 1580.62   | -0.01 | 1 CFCCPDRYFEK                   |
| 254 - 268   | 1548.76  | 1547.76   | 1547.76   | -0.00 | 0 LAIAGMGTDENSLTR               |
| 254 - 268   | 1564.77  | 1563.77   | 1563.76   | 0.02  | 0 LAIAGMGTDENSLTR Oxidation (M) |
| 288 - 295   | 970.50   | 969.50    | 969.54    | -0.04 | 1 RNSVPLER                      |
| 289 - 295   | 814.48   | 813.47    | 813.43    | 0.04  | 0 NSVPLER                       |

## Spot 2114

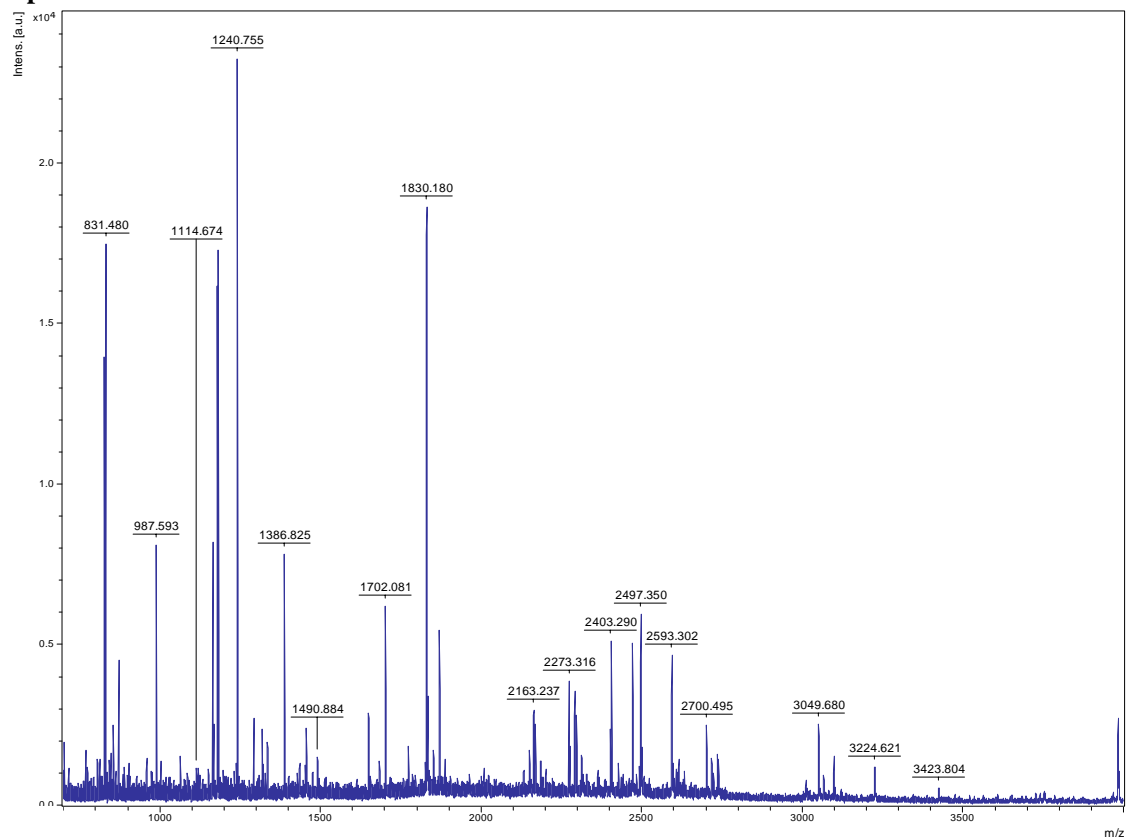

Match to: gi|50253039 Score: 86 Expect: 0.00016

### Matched peptides:

| Start - End | Observed  | Mr (expt) | Mr (calc) | Delta   | Miss Sequence                                     |
|-------------|-----------|-----------|-----------|---------|---------------------------------------------------|
| 11 - 33     | 2497.3496 | 2496.3423 | 2496.1438 | 0.1986  | 0 K.VSVAAVQFACTDVESENVDTAER.L Carbamidomethyl (C) |
| 42 - 62     | 2470.4053 | 2469.3980 | 2469.2110 | 0.1870  | 0 K.GANIVLVQELFEGQYFCQAQR.L Carbamidomethyl (C)   |
| 63 - 68     | 825.4935  | 824.4862  | 824.4181  | 0.0681  | 0 R.LDFFQR.A                                      |
| 87 - 122    | 3981.0291 | 3980.0218 | 3979.9478 | 0.0739  | 0 K.ELEVVIPVSFFEEANNAHNSVAIIDADGTDLGLYR.K         |
| 123 - 135   | 1455.7124 | 1454.7051 | 1454.7153 | -0.0102 | 1 R.KSHIPDPGPGYQEK.F                              |
| 136 - 146   | 1292.7198 | 1291.7126 | 1291.5873 | 0.1253  | 0 K.FYFNPGDGTGPK.A                                |
| 171 - 198   | 3049.6799 | 3048.6727 | 3048.4862 | 0.1865  | 0 R.AMVLQGAEIFYPTAIGSEPDNLDLSR.E                  |
| 204 - 221   | 1834.1740 | 1833.1667 | 1832.9678 | 0.1988  | 0 R.VMQGHAGANLPLVASNR.I                           |
| 204 - 221   | 1850.1320 | 1849.1247 | 1848.9628 | 0.1619  | 0 R.VMQGHAGANLPLVASNR.I Oxidation (M)             |
| 222 - 253   | 3423.8037 | 3422.7964 | 3422.6993 | 0.0972  | 1 R.IGRETVETEHEGSTITFFGNSFIAGPTGEIVK.L            |
| 225 - 253   | 3097.6748 | 3096.6675 | 3096.4927 | 0.1749  | 0 R.ETVETEHEGSTITFFGNSFIAGPTGEIVK.L               |
| 254 - 273   | 2291.3044 | 2290.2972 | 2290.1216 | 0.1756  | 1 K.LANDKDEDVLVAEFDLDEIK.S                        |
| 277 - 283   | 872.5273  | 871.5200  | 871.4453  | 0.0747  | 0 R.HGWGIFR.D                                     |
| 284 - 291   | 1062.6594 | 1061.6521 | 1061.5618 | 0.0904  | 1 R.DRRPDLYK.V                                    |
| 292 - 300   | 987.5934  | 986.5861  | 986.5648  | 0.0213  | 0 K.VLLTLDGEK.S                                   |

Match to: gi|77556463 Score: 76 Expect: 0.0018

### Matched peptides:

| Start - End | Observed  | Mr (expt) | Mr (calc) | Delta   | Miss Sequence                                       |
|-------------|-----------|-----------|-----------|---------|-----------------------------------------------------|
| 5 - 20      | 1386.8254 | 1385.8182 | 1385.6898 | 0.1284  | 0 K.SGVAEEGGAAAAA AVR.R                             |
| 21 - 29     | 987.5934  | 986.5861  | 986.5045  | 0.0816  | 1 R.RWVEAGGGR.L                                     |
| 22 - 29     | 831.4799  | 830.4726  | 830.4034  | 0.0691  | 0 R.WVEAGGGR.L                                      |
| 30 - 55     | 2700.4956 | 2699.4883 | 2699.3112 | 0.1772  | 0 R.LVMDGGLATELEANGADLNDPLWSAK.C                    |
| 30 - 55     | 2716.4858 | 2715.4786 | 2715.3061 | 0.1725  | 0 R.LVMDGGLATELEANGADLNDPLWSAK.C Oxidation (M)      |
| 56 - 65     | 1181.7459 | 1180.7386 | 1180.6386 | 0.0999  | 0 K.CLLSSPHLVR.K Carbamidomethyl (C)                |
| 95 - 107    | 1451.8721 | 1450.8648 | 1450.7303 | 0.1345  | 1 K.GFSKEQSEDLLAK.S                                 |
| 171 - 191   | 2296.4270 | 2295.4197 | 2295.2474 | 0.1724  | 1 R.RLEVLAEAGPDLIAFETIPNK.L                         |
| 218 - 240   | 2403.2900 | 2402.2828 | 2402.1205 | 0.1622  | 0 K.DGVHIVSGDSLIECATIANGCSK.V 2 Carbamidomethyl (C) |
| 241 - 252   | 1240.7551 | 1239.7479 | 1239.6393 | 0.1085  | 0 K.VGAVGINCTPPR.F Carbamidomethyl (C)              |
| 253 - 262   | 1168.7032 | 1167.6960 | 1167.7128 | -0.0168 | 0 R.FIHGLLSIR.K                                     |
| 263 - 278   | 1830.1804 | 1829.1731 | 1829.0046 | 0.1685  | 1 R.KVTDKPIIYPNSGER.Y                               |
| 264 - 278   | 1702.0806 | 1701.0733 | 1700.9097 | 0.1636  | 0 K.VTDKPIIYPNSGER.Y                                |
| 285 - 306   | 2593.3020 | 2592.2947 | 2592.1114 | 0.1833  | 0 K.EWVVESTGVSDGDFVSYVNEWCK.D Carbamidomethyl (C)   |
| 307 - 317   | 1120.6464 | 1119.6391 | 1119.5164 | 0.1226  | 0 K.DGAVLIGCCR.T Carbamidomethyl (C)                |
| 307 - 317   | 1177.6385 | 1176.6313 | 1176.5379 | 0.0934  | 0 K.DGAVLIGCCR.T 2 Carbamidomethyl (C)              |
| 334 - 342   | 960.6090  | 959.6017  | 959.5188  | 0.0829  | 0 R.HSSLHPVA.-                                      |

## Spot 2118

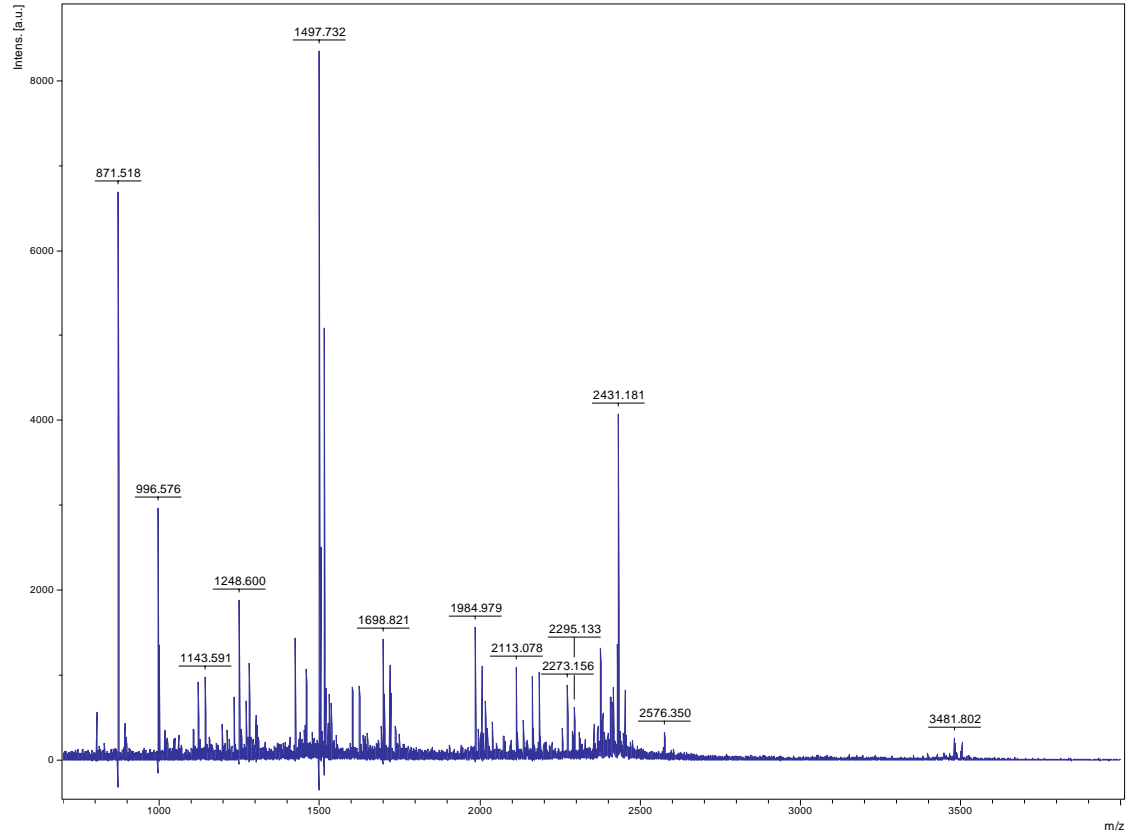

Match to: gi|84029333; Score: 82

### Matched peptides:

| Start - End | Observed | Mr (expt) | Mr (calc) | Delta | Miss Sequence                          |
|-------------|----------|-----------|-----------|-------|----------------------------------------|
| 25 - 31     | 871.51   | 870.51    | 870.51    | -0.00 | 0 LLHAVYR                              |
| 41 - 49     | 1195.41  | 1194.41   | 1194.45   | -0.04 | 0 CYTECFGMK                            |
| 41 - 49     | 1211.42  | 1210.42   | 1210.45   | -0.03 | 0 CYTECFGMK Oxidation (M)              |
| 119 - 127   | 996.57   | 995.56    | 995.58    | -0.01 | 1 ITREPGPVK                            |
| 128 - 149   | 2415.10  | 2414.10   | 2414.16   | -0.06 | 0 GGSTVIAFAQDPDGYMFELIQR               |
| 128 - 149   | 2431.12  | 2430.12   | 2430.15   | -0.03 | 0 GGSTVIAFAQDPDGYMFELIQR Oxidation (M) |
| 150 - 162   | 1497.71  | 1496.71   | 1496.75   | -0.04 | 0 GPTPEPLCQVMLR                        |
| 150 - 162   | 1513.72  | 1512.71   | 1512.74   | -0.03 | 0 GPTPEPLCQVMLR Oxidation (M)          |
| 222 - 237   | 1698.80  | 1697.80   | 1697.83   | -0.03 | 0 GNAYAQAIGTEDVYK                      |
| 253 - 266   | 1503.85  | 1502.85   | 1502.89   | -0.05 | 1 ILRQPGPLPGLNTK                       |
| 256 - 266   | 1104.58  | 1103.58   | 1103.60   | -0.02 | 0 QPGPLPGLNTK Pyro-glu (N-term Q)      |
| 256 - 266   | 1121.61  | 1120.61   | 1120.62   | -0.02 | 0 QPGPLPGLNTK                          |
| 267 - 277   | 1248.59  | 1247.59   | 1247.62   | -0.03 | 0 IASFLDPDGWK                          |
| 278 - 291   | 1602.84  | 1601.84   | 1601.87   | -0.02 | 1 VVLVDNADFLKELQ                       |

## Spot 2119

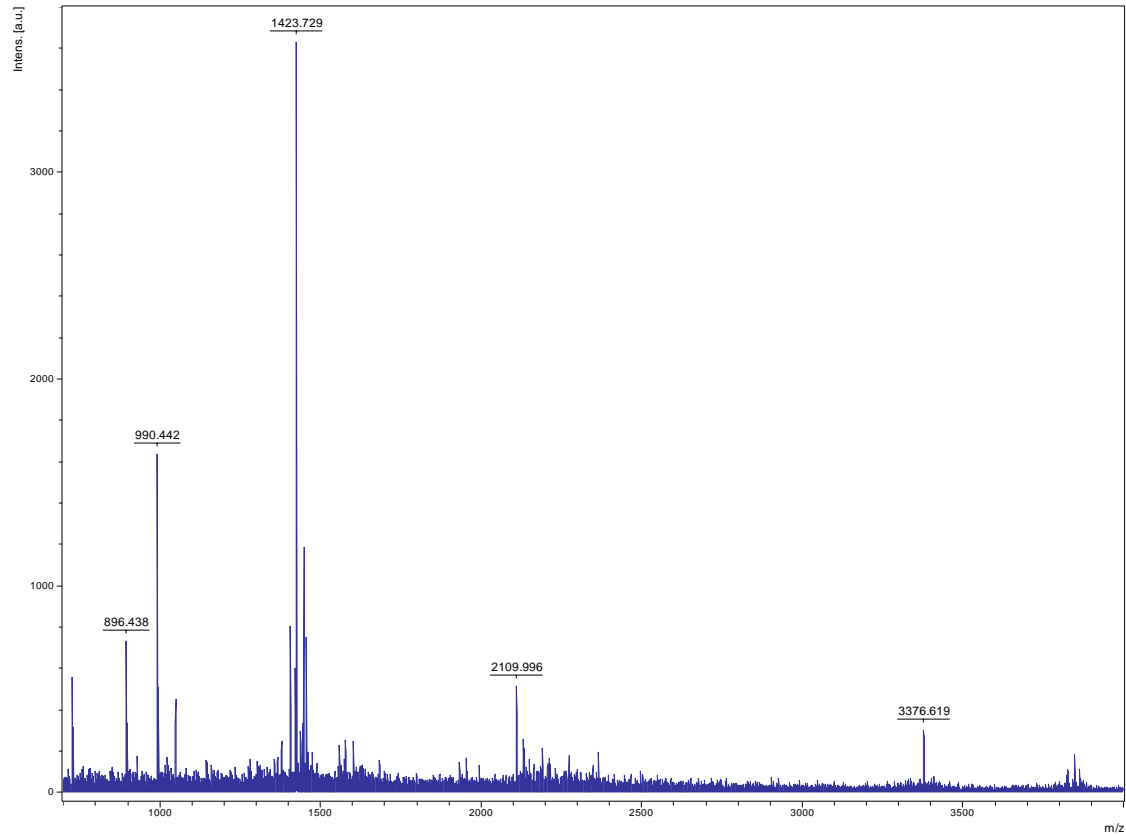

Match to: gi|18147582; Score: 118

### Matched peptides:

| Start - End | Observed | Mr (expt) | Mr (calc) | Delta | Miss Sequence                      |
|-------------|----------|-----------|-----------|-------|------------------------------------|
| 68 - 80     | 1448.66  | 1447.65   | 1447.64   | 0.01  | 0 YGSLASCYDGR                      |
| 86 - 103    | 2110.00  | 2108.99   | 2108.99   | 0.00  | 0 EGSKPDEWAQAHTFIEHK               |
| 104 - 135   | 3376.62  | 3375.62   | 3375.60   | 0.02  | 0 SSVNSIAWAPHELGLCLACGSSDGNISVFTAR |
| 136 - 144   | 994.45   | 993.45    | 993.42    | 0.03  | 0 SDGGWDITR                        |
| 196 - 202   | 895.45   | 894.45    | 894.43    | 0.01  | 0 LYNGSWR                          |
| 203 - 213   | 1405.62  | 1404.62   | 1404.61   | 0.01  | 0 MDCFPALQMHR                      |
| 203 - 213   | 1421.62  | 1420.61   | 1420.60   | 0.01  | 0 MDCFPALQMHR Oxidation (M)        |
| 249 - 256   | 990.44   | 989.44    | 989.42    | 0.02  | 0 EGEQWEGR                         |
| 257 - 267   | 1423.73  | 1422.73   | 1422.73   | -0.00 | 0 VLYDFQTPVWR                      |

### Spot 2120

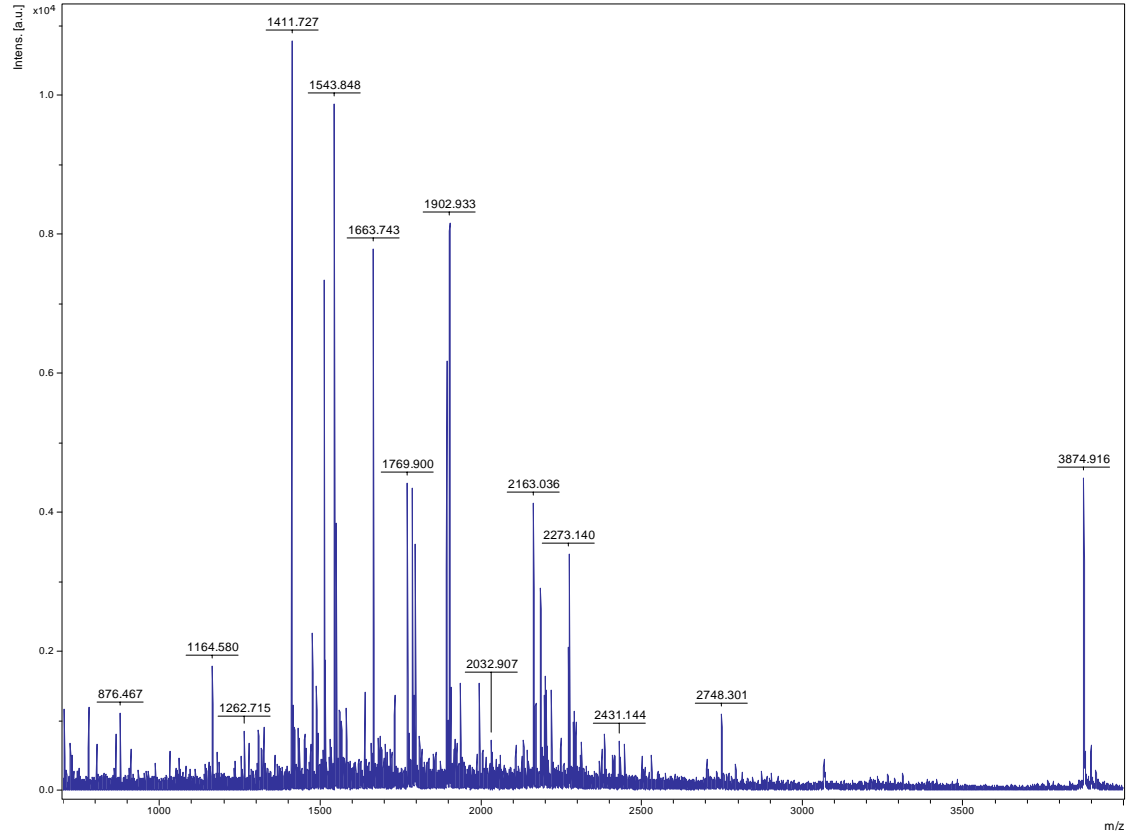

Match to: gi|3489936; Score: 108

#### Matched peptides:

| Start - End | Observed | Mr (expt) | Mr (calc) | Delta | Miss Sequence                              |
|-------------|----------|-----------|-----------|-------|--------------------------------------------|
| 6 - 12      | 876.47   | 875.46    | 875.42    | 0.05  | 0 VVVDECR                                  |
| 13 - 25     | 1411.73  | 1410.72   | 1410.71   | 0.01  | 0 GVLFVYSDGAVR                             |
| 27 - 44     | 1902.93  | 1901.93   | 1901.93   | 0.00  | 1 AAPGFATPVRDDGSVEWK                       |
| 45 - 52     | 864.45   | 863.45    | 863.41    | 0.04  | 0 DAVFDAAR                                 |
| 86 - 96     | 1511.65  | 1510.65   | 1510.64   | 0.01  | 0 TWPNQNYCLR                               |
| 97 - 111    | 1543.85  | 1542.85   | 1542.84   | 0.01  | 0 LAELGAVVVPDYR                            |
| 153 - 171   | 1893.99  | 1892.99   | 1892.99   | 0.00  | 0 VFVSGDSAGGTIAHHLAVR                      |
| 186 - 201   | 1769.90  | 1768.90   | 1768.90   | 0.00  | 0 VAGYVQLMPFFGGVER                         |
| 186 - 201   | 1785.90  | 1784.90   | 1784.89   | 0.01  | 0 VAGYVQLMPFFGGVER Oxidation (M)           |
| 202 - 216   | 1663.74  | 1662.74   | 1662.73   | 0.01  | 0 TPSEAACPDDAFLNR                          |
| 225 - 264   | 3874.92  | 3873.91   | 3873.97   | -0.06 | 0 LSLPAGGATADHPFSNPFPGASPDLAEEAFAPTLVVVGGR |
| 316 - 327   | 1164.58  | 1163.58   | 1163.56   | 0.02  | 0 LFVDTDGGGGAR                             |

## Spot 2121

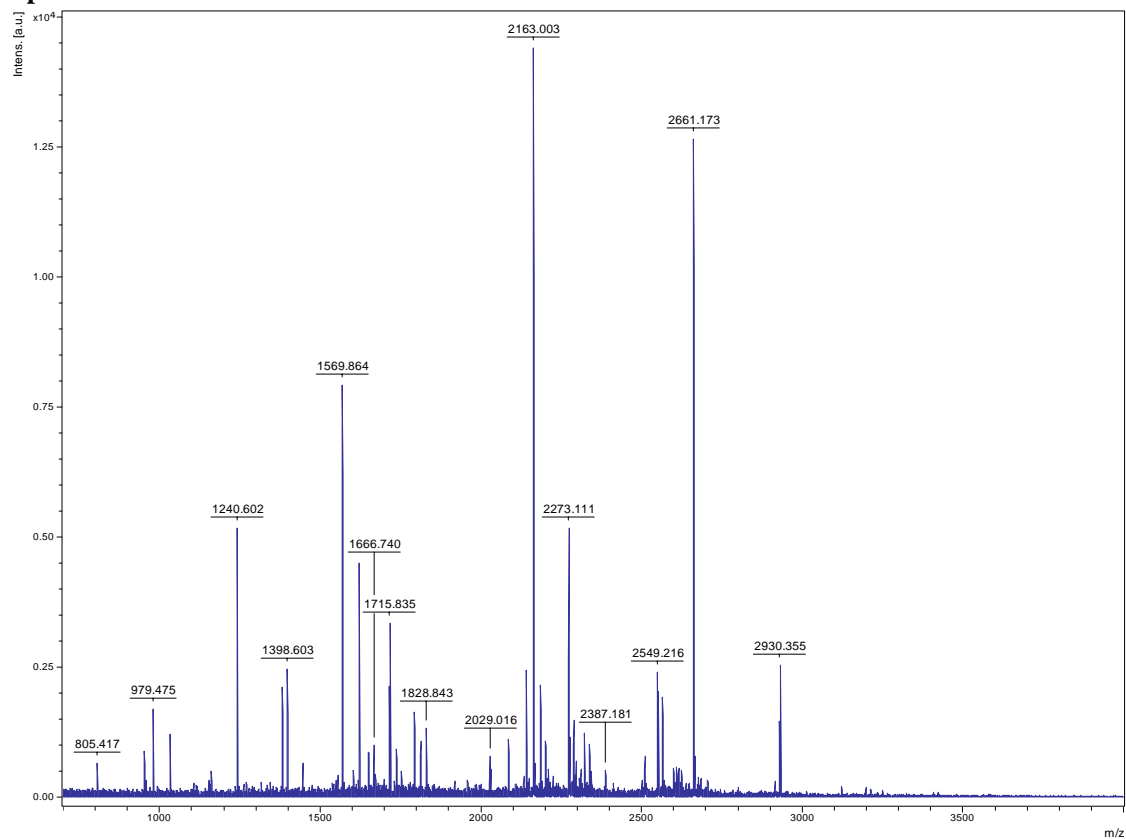

Match to: gi|50540752; Score: 139

### Matched peptides:

| Start - End | Observed | Mr (expt) | Mr (calc) | Delta | Miss Sequence                             |
|-------------|----------|-----------|-----------|-------|-------------------------------------------|
| 20 - 36     | 1569.86  | 1568.86   | 1568.89   | -0.03 | 0 VALVTGGASGIGEAIVR                       |
| 37 - 44     | 957.53   | 956.53    | 956.52    | 0.01  | 1 LFRFHGAK                                |
| 45 - 57     | 1446.66  | 1445.66   | 1445.68   | -0.02 | 0 VCIADIQDEAGQK                           |
| 45 - 59     | 1715.84  | 1714.83   | 1714.87   | -0.03 | 1 VCIADIQDEAGQKLR                         |
| 58 - 83     | 2930.36  | 2929.35   | 2929.39   | -0.03 | 1 LRDSLGGDQDLFVHCDVSVEEDVAR               |
| 60 - 83     | 2661.17  | 2660.17   | 2660.20   | -0.03 | 0 DSLGGDQDLFVHCDVSVEEDVAR                 |
| 84 - 108    | 2614.23  | 2613.23   | 2613.27   | -0.05 | 1 AVDATAEKFGTLDIMVNNAGFTGQK Oxidation (M) |
| 92 - 108    | 1812.85  | 1811.85   | 1811.89   | -0.04 | 0 FGTLDIMVNNAGFTGQK                       |
| 92 - 108    | 1828.84  | 1827.84   | 1827.88   | -0.04 | 0 FGTLDIMVNNAGFTGQK Oxidation (M)         |
| 114 - 121   | 979.47   | 978.47    | 978.48    | -0.00 | 0 NIDFSEVR                                |
| 193 - 215   | 2549.22  | 2548.21   | 2548.25   | -0.03 | 0 VNCVSPYAVPTALSMPYLPQGER                 |
| 193 - 215   | 2565.20  | 2564.20   | 2564.24   | -0.04 | 0 VNCVSPYAVPTALSMPYLPQGER Oxidation (M)   |
| 242 - 256   | 1620.79  | 1619.79   | 1619.82   | -0.03 | 0 DVAQAVLYLASDEAR                         |
| 257 - 277   | 2321.14  | 2320.13   | 2320.16   | -0.03 | 0 YISALNLMVDGGFTSVNHNLRL                  |
| 257 - 277   | 2337.12  | 2336.12   | 2336.16   | -0.04 | 0 YISALNLMVDGGFTSVNHNLRL Oxidation (M)    |

## Spot 2124

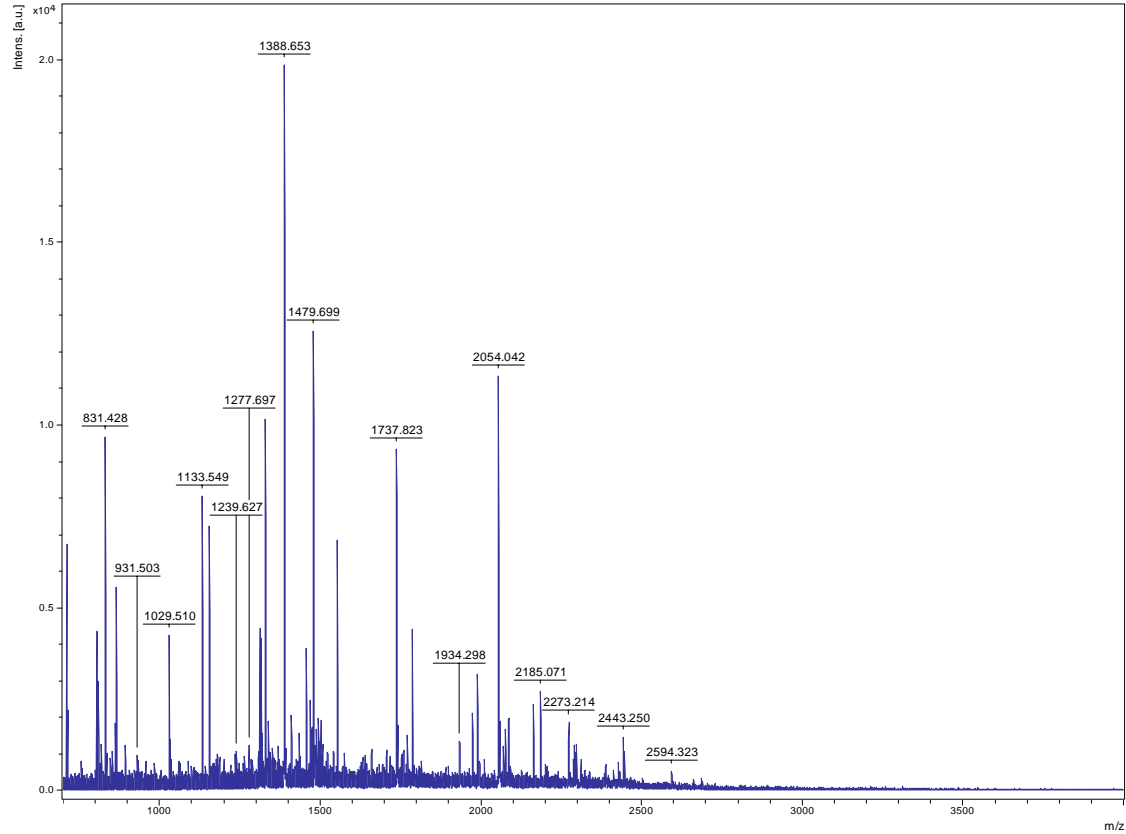

Match to: gi|51091938; Score: 195

### Matched peptides:

| Start - End | Observed | Mr (expt) | Mr (calc) | Delta | Miss Sequence                           |
|-------------|----------|-----------|-----------|-------|-----------------------------------------|
| 26 - 41     | 1552.79  | 1551.79   | 1551.79   | -0.00 | 0 LGGDPTVPAGTDPVTR                      |
| 46 - 53     | 810.43   | 809.42    | 809.41    | 0.01  | 0 DIHAGAAR                              |
| 101 - 111   | 1155.60  | 1154.60   | 1154.61   | -0.01 | 0 AGAIGSVYYR                            |
| 112 - 130   | 2054.04  | 2053.04   | 2053.03   | 0.01  | 0 LAPENLPAAAYEDAWAAVR                   |
| 136 - 151   | 1737.82  | 1736.82   | 1736.81   | 0.01  | 0 GDGADPWLLDHADLSR                      |
| 152 - 170   | 1972.99  | 1971.98   | 1971.98   | 0.01  | 0 LFLAGCSAGANIAHNMAVR                   |
| 152 - 170   | 1989.00  | 1988.00   | 1987.97   | 0.03  | 0 LFLAGCSAGANIAHNMAVR Oxidation (M)     |
| 171 - 184   | 1329.64  | 1328.63   | 1328.65   | -0.02 | 0 CGGGGALPDGVTLR                        |
| 185 - 196   | 1316.72  | 1315.72   | 1315.73   | -0.01 | 0 GLVVVHPYFTGK                          |
| 197 - 210   | 1388.65  | 1387.65   | 1387.67   | -0.02 | 0 EAVGAEAAFDPVR                         |
| 219 - 231   | 1479.70  | 1478.70   | 1478.70   | -0.01 | 0 FVPETSGLDDPR                          |
| 219 - 241   | 2594.32  | 2593.32   | 2593.24   | 0.08  | 1 FVPETSGLDDPRVNPVDDATR                 |
| 232 - 241   | 1133.55  | 1132.55   | 1132.55   | -0.01 | 0 VNPVDDATR                             |
| 242 - 251   | 1029.51  | 1028.51   | 1028.51   | 0.00  | 0 AAAAAIPCR                             |
| 252 - 266   | 1785.95  | 1784.95   | 1784.95   | 0.01  | 1 VQVCVAEQDVLLKER                       |
| 267 - 272   | 831.43   | 830.43    | 830.42    | 0.01  | 0 GLWYHR                                |
| 267 - 275   | 1201.62  | 1200.62   | 1200.64   | -0.02 | 1 GLWYHRELK                             |
| 276 - 289   | 1472.70  | 1471.70   | 1471.68   | 0.01  | 0 ASGYGGEVELFESK                        |
| 290 - 312   | 2427.22  | 2426.22   | 2426.18   | 0.04  | 0 GVGHAFHFVGMAGSDQAVELLER               |
| 290 - 312   | 2443.25  | 2442.25   | 2442.17   | 0.07  | 0 GVGHAFHFVGMAGSDQAVELLER Oxidation (M) |



### Spot 2130

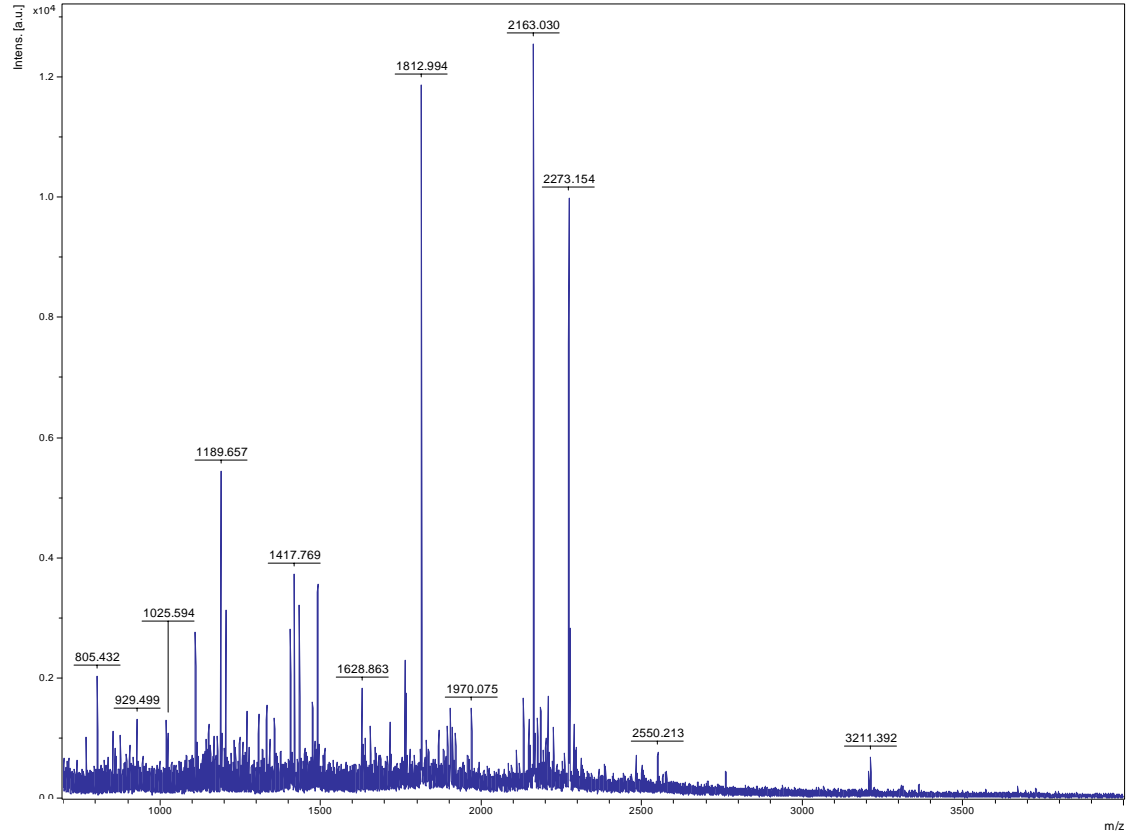

Match to: gi|50924834 Score: 94 Expect: 2.7e-05

#### Matched peptides:

| Start - End | Observed  | Mr (expt) | Mr (calc) | Delta   | Miss Sequence                         |
|-------------|-----------|-----------|-----------|---------|---------------------------------------|
| 18 - 34     | 2131.9680 | 2130.9607 | 2130.9601 | 0.0006  | 1 K.LAEQAERYEEMVEFMEK.V               |
| 18 - 34     | 2147.9413 | 2146.9340 | 2146.9550 | -0.0210 | 1 K.LAEQAERYEEMVEFMEK.V Oxidation (M) |
| 38 - 49     | 1406.6562 | 1405.6489 | 1405.6572 | -0.0083 | 0 K.TVDSEELTVEER.N                    |
| 38 - 57     | 2295.1707 | 2294.1634 | 2294.1641 | -0.0007 | 1 K.TVDSEELTVEERNLLSVAYK.N            |
| 65 - 76     | 1417.7921 | 1416.7848 | 1416.7725 | 0.0123  | 1 R.ASWRIISSIEQ.E                     |
| 161 - 177   | 1813.0052 | 1811.9979 | 1811.9893 | 0.0086  | 0 K.AAQDIALAELPPTHPIR.L               |
| 204 - 222   | 2175.0193 | 2174.0120 | 2173.9902 | 0.0218  | 0 K.QAFDEAISLDTLSEESYK.D              |
| 223 - 232   | 1189.6301 | 1188.6228 | 1188.6536 | -0.0308 | 0 K.DSTLIMQLLR.D                      |
| 223 - 232   | 1205.6398 | 1204.6325 | 1204.6485 | -0.0160 | 0 K.DSTLIMQLLR.D Oxidation (M)        |
| 233 - 251   | 2208.0363 | 2207.0290 | 2207.0230 | 0.0061  | 0 R.DNLTWTSIDSETAAEIR.E               |

## Spot 2131

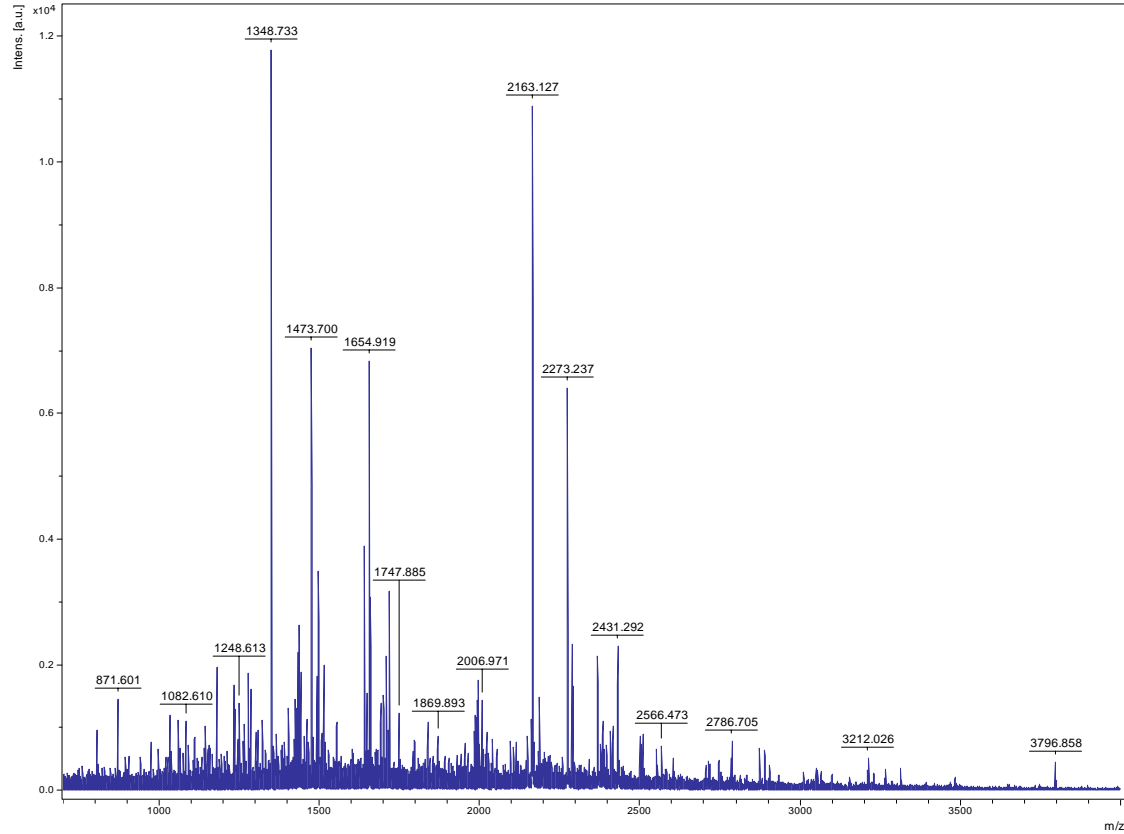

Match to: gj|11131901; Score: 105

### Matched peptides:

| Start - End | Observed | Mr (expt) | Mr (calc) | Delta | Miss Sequence                           |
|-------------|----------|-----------|-----------|-------|-----------------------------------------|
| 27 - 49     | 2550.41  | 2549.41   | 2549.22   | 0.19  | 1 VVDGCEAQAIAKLEIMEPCSSVK Oxidation (M) |
| 52 - 70     | 2039.04  | 2038.04   | 2038.03   | 0.01  | 1 IGYSMITDAEERGLITPGK Oxidation (M)     |
| 71 - 92     | 2148.13  | 2147.13   | 2147.13   | 0.00  | 0 SVLIEPTSGNTGIGLAFMAAAK                |
| 114 - 129   | 1690.87  | 1689.86   | 1689.90   | -0.04 | 0 AFGAELVLTDPPLGMK Oxidation (M)        |
| 142 - 158   | 1990.98  | 1989.98   | 1989.96   | 0.02  | 0 MPNSYILQQFENPANPK                     |
| 142 - 158   | 2006.97  | 2005.97   | 2005.96   | 0.01  | 0 MPNSYILQQFENPANPK Oxidation (M)       |
| 159 - 170   | 1473.70  | 1472.70   | 1472.73   | -0.03 | 0 IHYETTGPFIWK                          |
| 205 - 225   | 2165.19  | 2164.19   | 2164.13   | 0.06  | 0 IYGVPTESAILSGGRPGPHK                  |
| 265 - 282   | 1654.92  | 1653.92   | 1653.94   | -0.02 | 0 EGLLVGISSGAAVAAIR                     |
| 283 - 290   | 941.58   | 940.58    | 940.51    | 0.07  | 0 VAQRPENK                              |
| 293 - 304   | 1348.73  | 1347.73   | 1347.75   | -0.02 | 0 LVVVVFPFGER                           |
| 305 - 315   | 1285.67  | 1284.67   | 1284.70   | -0.02 | 0 YLSSVLFESIK                           |
| 305 - 316   | 1441.77  | 1440.77   | 1440.80   | -0.03 | 1 YLSSVLFESIKR                          |

## Spot 2136

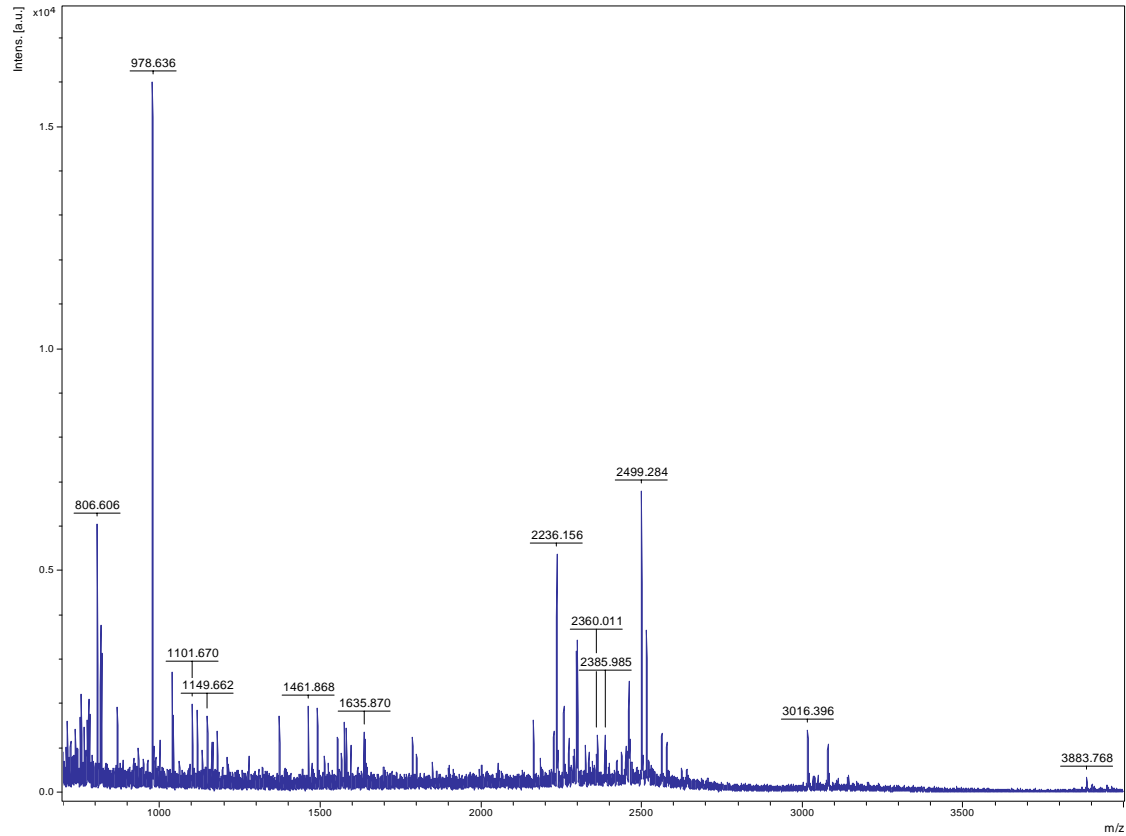

Match to: AAP94211 Score: 80 Expect: 0.00063

### Matched peptides:

| Start - End | Observed  | Mr (expt) | Mr (calc) | Delta   | Miss Sequence                              |
|-------------|-----------|-----------|-----------|---------|--------------------------------------------|
| 67 - 82     | 1580.9207 | 1579.9134 | 1579.8933 | 0.0201  | 0 K.AVDNVNSVIAPALIGK.D                     |
| 112 - 126   | 1513.8391 | 1512.8318 | 1512.8697 | -0.0379 | 0 K.LGANAILAVSLAICK.A Carbamidomethyl (C)  |
| 206 - 227   | 2324.0825 | 2323.0752 | 2323.0352 | 0.0401  | 0 K.YGQDATNVGDEGGFAPNIQENK.E               |
| 291 - 315   | 3016.3960 | 3015.3887 | 3015.3450 | 0.0437  | 0 K.SFVSEYPIVSIEDPFQDDWEHYAK.M             |
| 316 - 338   | 2499.2837 | 2498.2764 | 2498.2686 | 0.0078  | 0 K.MTAEIGEQQIVGDDLLVTNPTR.V               |
| 316 - 338   | 2515.3215 | 2514.3143 | 2514.2635 | 0.0508  | 0 K.MTAEIGEQQIVGDDLLVTNPTR.V Oxidation (M) |
| 355 - 369   | 1573.9353 | 1572.9280 | 1572.8358 | 0.0922  | 0 K.VNIGSVTESIEAVK.M                       |
| 374 - 383   | 1101.6703 | 1100.6630 | 1100.5185 | 0.1445  | 0 R.AGWGVMTSHR.S                           |
| 374 - 383   | 1117.6632 | 1116.6559 | 1116.5134 | 0.1425  | 0 R.AGWGVMTSHR.S Oxidation (M)             |
| 384 - 405   | 2236.1558 | 2235.1485 | 2235.1270 | 0.0215  | 0 R.SGETEDTFIADLAVGLATGQIK.T               |
| 418 - 423   | 806.6063  | 805.5990  | 805.4446  | 0.1544  | 0 K.YNQLLR.I                               |
| 424 - 438   | 1491.8649 | 1490.8576 | 1490.7616 | 0.0960  | 0 R.IEEELGAAAVYAGAK.F                      |
| 439 - 446   | 978.6363  | 977.6290  | 977.4970  | 0.1320  | 1 K.FRAPPVEPY.-                            |

### Spot 2139

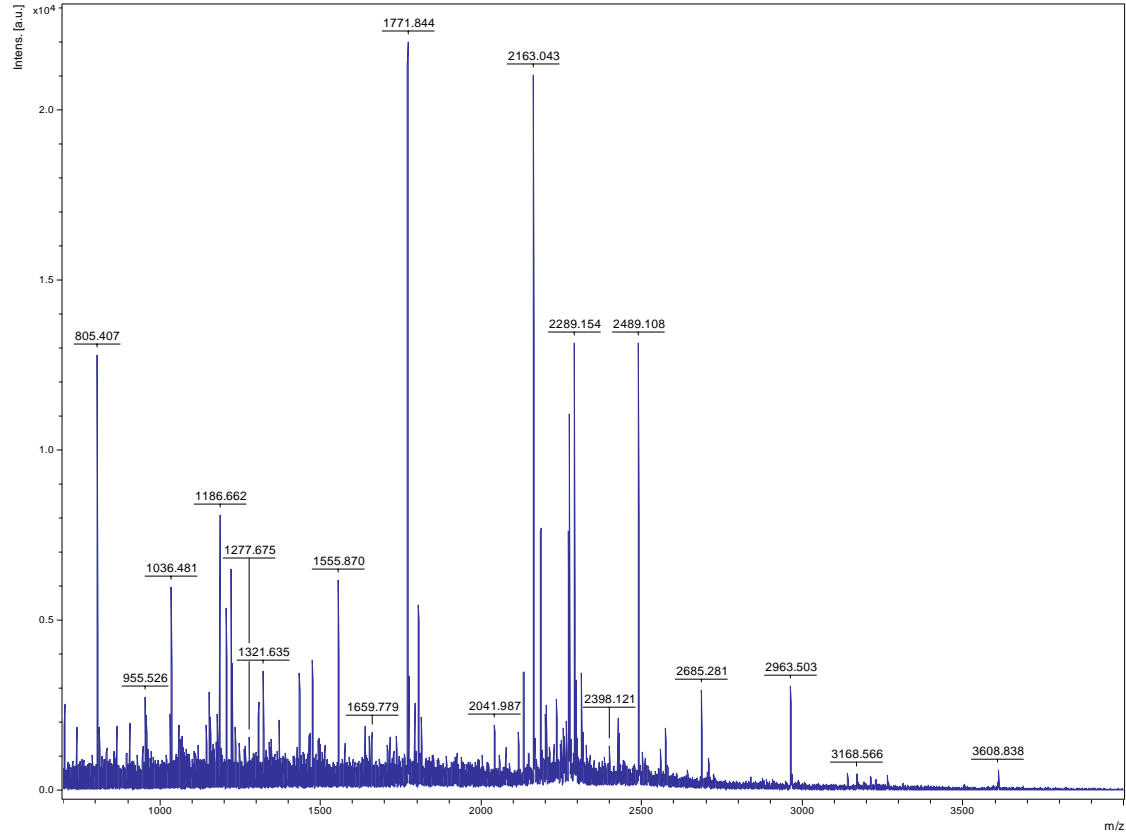

Match to: gi|75220444; Score: 80

#### Matched peptides:

| Start - End | Observed | Mr (expt) | Mr (calc) | Delta | Miss Sequence                             |
|-------------|----------|-----------|-----------|-------|-------------------------------------------|
| 31 - 38     | 947.51   | 946.51    | 946.47    | 0.03  | 0 SCAPLMLR                                |
| 31 - 38     | 963.49   | 962.48    | 962.47    | -0.02 | 0 SCAPLMLR Oxidation (M)                  |
| 39 - 61     | 2398.12  | 2397.12   | 2397.14   | -0.02 | 1 LAWHSAGTFDVSSKTGGPFGTMK Oxidation (M)   |
| 62 - 79     | 1805.94  | 1804.94   | 1804.94   | -0.01 | 0 TPAELSHAANAGLDIAVR                      |
| 143 - 167   | 2557.28  | 2556.28   | 2556.28   | 0.00  | 0 QVFQAQMGLSDQDIVALSGGHTLGR               |
| 143 - 167   | 2573.28  | 2572.28   | 2572.27   | 0.01  | 0 QVFQAQMGLSDQDIVALSGGHTLGR Oxidation (M) |
| 171 - 181   | 1321.64  | 1320.63   | 1320.62   | 0.01  | 1 ERSFGFEPWTR                             |
| 173 - 181   | 1036.48  | 1035.48   | 1035.48   | 0.00  | 0 SGFEGPWTR                               |
| 182 - 209   | 3168.57  | 3167.56   | 3167.57   | -0.01 | 1 NPLQFDNSYFTELLSGDKEGLLQLPSDK            |
| 210 - 223   | 1555.87  | 1554.87   | 1554.88   | -0.01 | 0 ALLSDPAFRPLVEK                          |
| 230 - 241   | 1497.74  | 1496.74   | 1496.73   | 0.01  | 1 AFFEDYKEAHLK                            |

## Spot 2144

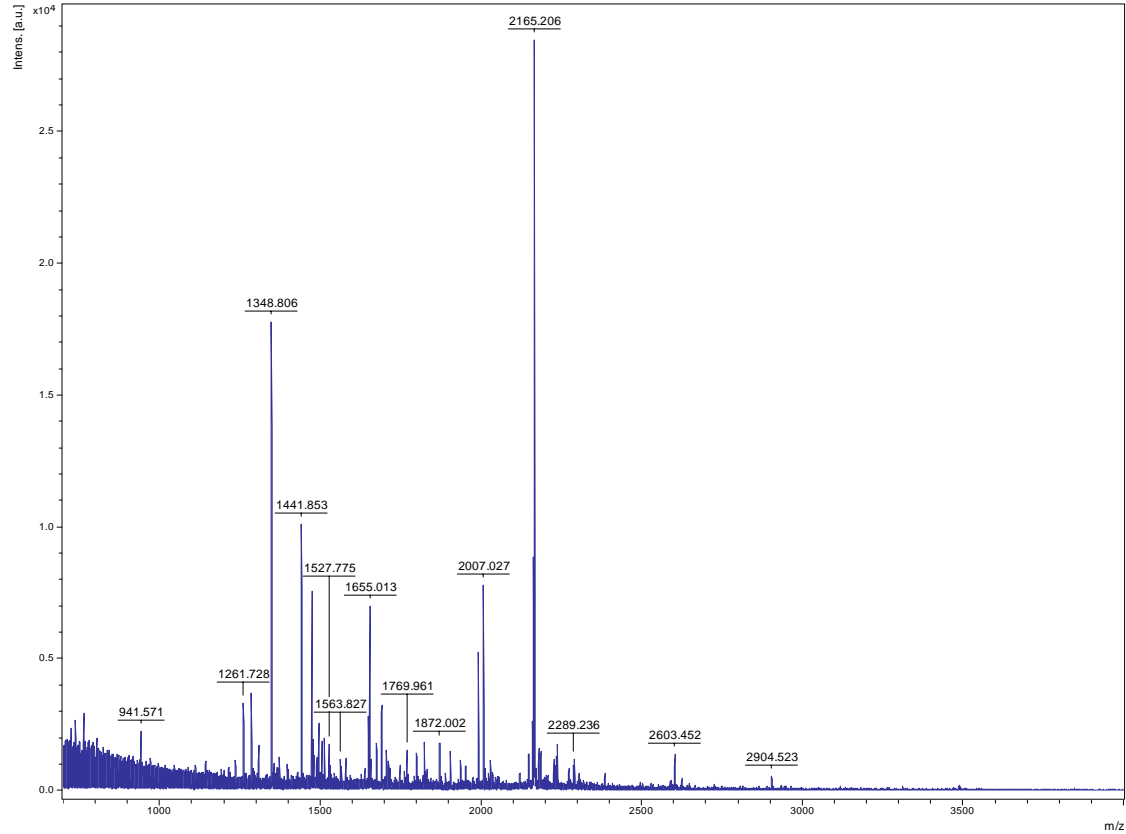

Match to: gj|11131901; Score: 198

### Matched peptides:

| Start - End | Observed | Mr (expt) | Mr (calc) | Delta | Miss Sequence                     |
|-------------|----------|-----------|-----------|-------|-----------------------------------|
| 27 - 38     | 1260.69  | 1259.69   | 1259.62   | 0.07  | 0 VVDGCEAQIAK                     |
| 39 - 49     | 1308.69  | 1307.69   | 1307.61   | 0.08  | 0 LEIMEPCSSVK Oxidation (M)       |
| 39 - 51     | 1563.83  | 1562.83   | 1562.74   | 0.08  | 1 LEIMEPCSSVKDR                   |
| 39 - 51     | 1579.80  | 1578.79   | 1578.74   | 0.06  | 1 LEIMEPCSSVKDR Oxidation (M)     |
| 52 - 63     | 1356.69  | 1355.69   | 1355.63   | 0.06  | 0 IGYSMITDAEEK                    |
| 52 - 63     | 1372.70  | 1371.70   | 1371.62   | 0.07  | 0 IGYSMITDAEEK Oxidation (M)      |
| 71 - 92     | 2148.18  | 2147.18   | 2147.13   | 0.05  | 0 SVLIPTSGNTGIGLAFMAAAK           |
| 96 - 108    | 1479.79  | 1478.79   | 1478.73   | 0.06  | 0 LILTMPASMSMER                   |
| 96 - 108    | 1495.79  | 1494.78   | 1494.72   | 0.06  | 0 LILTMPASMSMER Oxidation (M)     |
| 96 - 108    | 1511.79  | 1510.78   | 1510.72   | 0.06  | 0 LILTMPASMSMER 2 Oxidation (M)   |
| 96 - 108    | 1527.78  | 1526.77   | 1526.71   | 0.06  | 0 LILTMPASMSMER 3 Oxidation (M)   |
| 114 - 129   | 1674.97  | 1673.97   | 1673.91   | 0.06  | 0 AFGAELVLTDPPLGGMK               |
| 114 - 129   | 1690.96  | 1689.96   | 1689.90   | 0.06  | 0 AFGAELVLTDPPLGGMK Oxidation (M) |
| 142 - 158   | 1991.03  | 1990.03   | 1989.96   | 0.07  | 0 MPNSYILQQFENPANPK               |
| 142 - 158   | 2007.03  | 2006.03   | 2005.96   | 0.07  | 0 MPNSYILQQFENPANPK Oxidation (M) |
| 159 - 170   | 1473.79  | 1472.79   | 1472.73   | 0.06  | 0 IHYETTGPETWK                    |
| 171 - 194   | 2160.24  | 2159.24   | 2159.18   | 0.06  | 1 ATAGKVDILVSGIGTGGTVTGTGK        |
| 195 - 204   | 1261.73  | 1260.73   | 1260.67   | 0.05  | 1 YLKEQNPEIK                      |
| 205 - 225   | 2165.21  | 2164.20   | 2164.13   | 0.08  | 0 IYGVPTESAILSGRPPGPHK            |
| 265 - 282   | 1655.01  | 1654.01   | 1653.94   | 0.07  | 0 EGLLVGISSGAAVAAIR               |
| 283 - 290   | 941.57   | 940.57    | 940.51    | 0.06  | 0 VAQRPEIK                        |
| 293 - 304   | 1348.81  | 1347.80   | 1347.75   | 0.05  | 0 LVVVVFPSPFGER                   |
| 305 - 315   | 1285.75  | 1284.75   | 1284.70   | 0.05  | 0 YLSSVLFESIK                     |
| 305 - 316   | 1441.85  | 1440.85   | 1440.80   | 0.05  | 1 YLSSVLFESIKR                    |

### Spot 2145

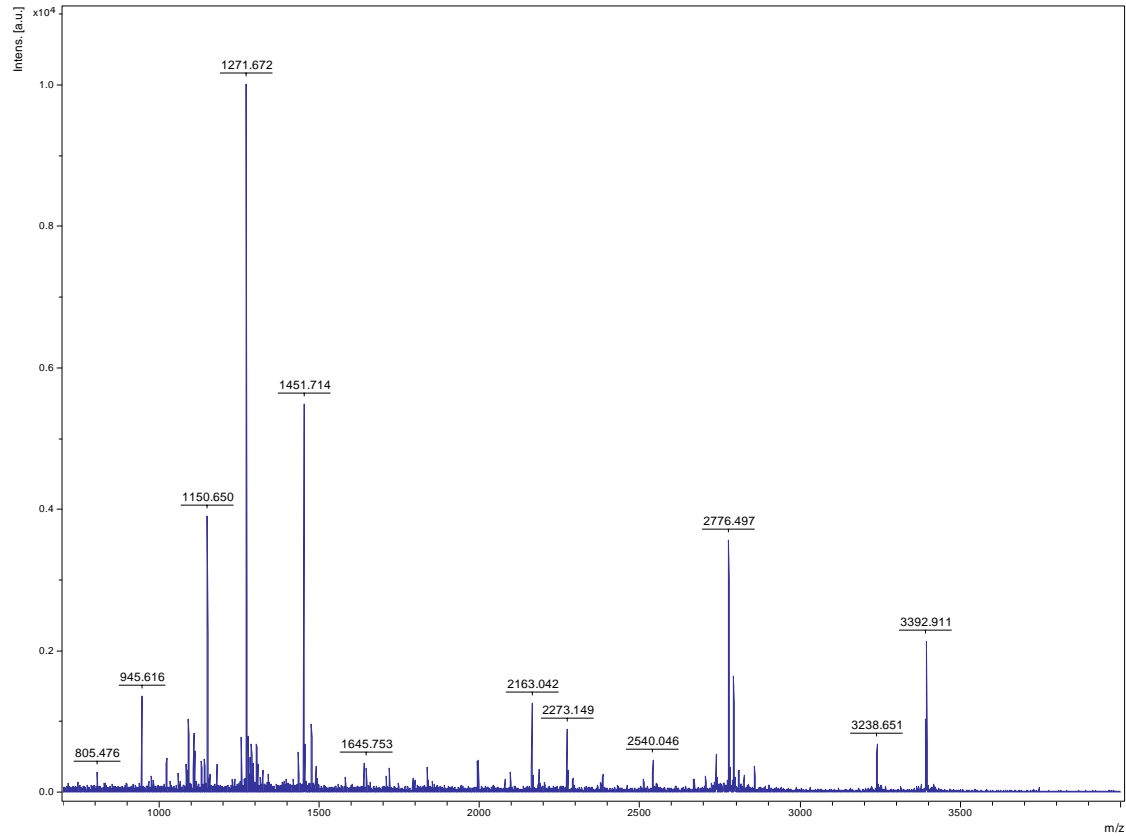

Match to: gi|6166140 Score: 120

#### Matched peptides:

| Start - End | Observed  | Mr (expt) | Mr (calc) | Delta   | Miss Sequence                           |
|-------------|-----------|-----------|-----------|---------|-----------------------------------------|
| 15 - 23     | 1150.6504 | 1149.6431 | 1149.6393 | 0.0038  | 1 K.KLDEYLLTR.S                         |
| 16 - 23     | 1022.5751 | 1021.5678 | 1021.5444 | 0.0234  | 0 K.LDEYLLTR.S                          |
| 56 - 65     | 1271.6719 | 1270.6646 | 1270.6822 | -0.0176 | 0 R.WFTHIDALLR.L                        |
| 66 - 77     | 1131.6021 | 1130.5948 | 1130.5931 | 0.0017  | 0 R.LSGVTADGQGVK.V                      |
| 96 - 118    | 2540.0461 | 2539.0389 | 2538.9881 | 0.0507  | 0 K.APAADDDDDVDLFGEEETEEK.K             |
| 140 - 157   | 2094.9529 | 2093.9456 | 2093.9827 | -0.0371 | 0 K.SSVLLDVKPWDDDETDMTK.L Oxidation (M) |
| 167 - 176   | 1091.5631 | 1090.5558 | 1090.5481 | 0.0078  | 0 K.MEGLLWGASK.L                        |
| 177 - 185   | 945.6155  | 944.6083  | 944.5694  | 0.0388  | 0 K.LVPVGYGIR.K                         |

## Spot 2146

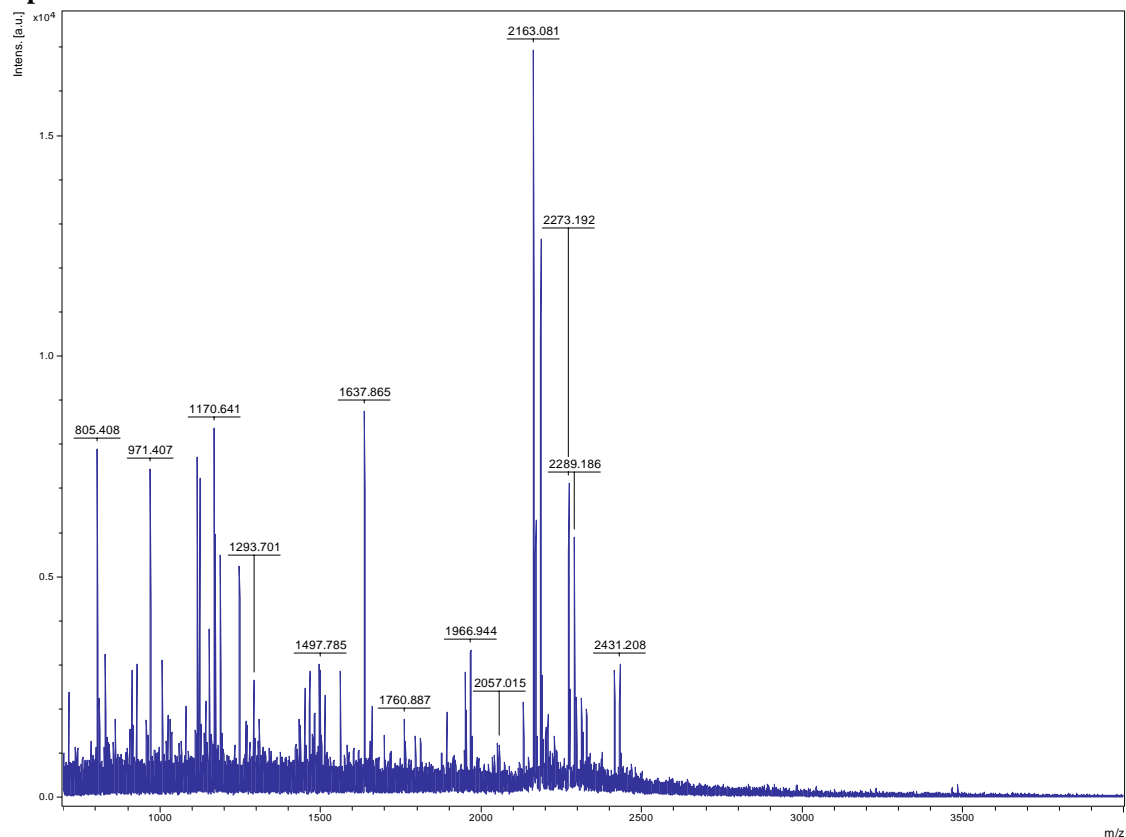

Match to: gi|57283874; Score: 181

### Matched peptides:

| Start - End | Observed | Mr (expt) | Mr (calc) | Delta | Miss Sequence                                  |
|-------------|----------|-----------|-----------|-------|------------------------------------------------|
| 140 - 146   | 805.41   | 804.41    | 804.44    | -0.03 | 0 IPPTYSK                                      |
| 188 - 194   | 971.41   | 970.40    | 970.40    | 0.00  | 0 ACYECLR                                      |
| 195 - 213   | 2170.02  | 2169.02   | 2168.98   | 0.04  | 1 GGLDFTKDDENVNSQPFMR                          |
| 202 - 213   | 1451.67  | 1450.66   | 1450.61   | 0.05  | 0 DDENVNSQPFMR                                 |
| 202 - 213   | 1467.64  | 1466.64   | 1466.61   | 0.03  | 0 DDENVNSQPFMR Oxidation (M)                   |
| 218 - 227   | 1247.63  | 1246.62   | 1246.61   | 0.02  | 0 FVFCAEAIYK                                   |
| 228 - 236   | 962.48   | 961.48    | 961.47    | 0.01  | 0 SQAETGEIK                                    |
| 237 - 252   | 1794.86  | 1793.86   | 1793.81   | 0.05  | 0 GHYLNATAGTCEEMIK                             |
| 237 - 252   | 1810.85  | 1809.85   | 1809.80   | 0.05  | 0 GHYLNATAGTCEEMIK Oxidation (M)               |
| 237 - 253   | 1950.95  | 1949.95   | 1949.91   | 0.04  | 1 GHYLNATAGTCEEMIKR                            |
| 237 - 253   | 1966.94  | 1965.94   | 1965.90   | 0.04  | 1 GHYLNATAGTCEEMIKR Oxidation (M)              |
| 286 - 295   | 1187.67  | 1186.67   | 1186.66   | 0.01  | 0 DNGLLHHHR                                    |
| 296 - 303   | 912.47   | 911.47    | 911.46    | 0.00  | 0 AMHAVIDR                                     |
| 296 - 303   | 928.48   | 927.48    | 927.46    | 0.02  | 0 AMHAVIDR Oxidation (M)                       |
| 304 - 312   | 1153.58  | 1152.58   | 1152.52   | 0.05  | 1 QKNHGMHFR Oxidation (M); Pyro-glu (N-term Q) |
| 304 - 312   | 1170.64  | 1169.64   | 1169.55   | 0.09  | 1 QKNHGMHFR Oxidation (M)                      |
| 306 - 312   | 914.42   | 913.42    | 913.40    | 0.02  | 0 NHGMHFR Oxidation (M)                        |
| 306 - 316   | 1309.70  | 1308.70   | 1308.69   | 0.01  | 1 NHGMHFRVLAK                                  |
| 320 - 334   | 1465.72  | 1464.71   | 1464.71   | -0.00 | 0 MSGGDHIIHAGTVVGK                             |
| 320 - 334   | 1481.74  | 1480.74   | 1480.71   | 0.03  | 0 MSGGDHIIHAGTVVGK Oxidation (M)               |
| 320 - 339   | 2050.01  | 2049.01   | 2049.01   | 0.00  | 1 MSGGDHIIHAGTVVGKLEGER                        |
| 335 - 350   | 1893.99  | 1892.98   | 1892.97   | 0.02  | 1 LEGEREMTLGFVDLLR Oxidation (M)               |
| 340 - 350   | 1293.70  | 1292.70   | 1292.68   | 0.02  | 0 EMTLGFVDLLR                                  |
| 340 - 356   | 2057.02  | 2056.01   | 2056.02   | -0.01 | 1 EMTLGFVDLLRDDFIEK Oxidation (M)              |
| 351 - 358   | 1037.49  | 1036.49   | 1036.48   | 0.01  | 1 DDFIEKDR                                     |
| 422 - 431   | 1116.59  | 1115.59   | 1115.58   | 0.01  | 0 VALEACVQAR                                   |
| 451 - 463   | 1560.80  | 1559.80   | 1559.74   | 0.05  | 0 WSPELAAACEIWK                                |

## Spot 2147

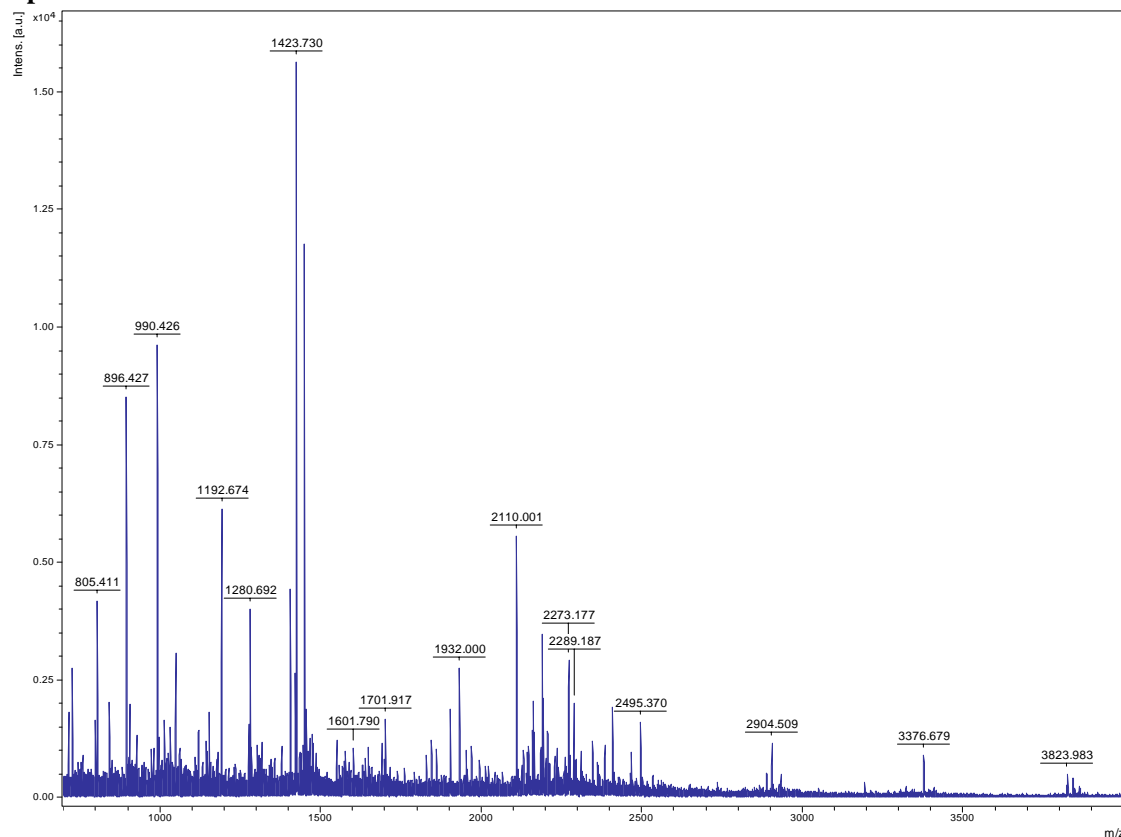

Match to: gi|18147582; Score: 160

### Matched peptides:

| Start - End | Observed | Mr (expt) | Mr (calc) | Delta | Miss Sequence                            |
|-------------|----------|-----------|-----------|-------|------------------------------------------|
| 6 - 24      | 2191.03  | 2190.03   | 2190.01   | 0.02  | 0 IETGHQDVVHDIAMDYYGK                    |
| 6 - 24      | 2207.02  | 2206.02   | 2206.00   | 0.02  | 0 IETGHQDVVHDIAMDYYGK Oxidation (M)      |
| 6 - 25      | 2347.16  | 2346.15   | 2346.11   | 0.05  | 1 IETGHQDVVHDIAMDYYGKR                   |
| 26 - 36     | 1120.57  | 1119.56   | 1119.58   | -0.01 | 0 IATASSDNTIK                            |
| 68 - 80     | 1448.66  | 1447.65   | 1447.64   | 0.01  | 0 YGSLASCSYDGR                           |
| 86 - 103    | 2110.00  | 2109.00   | 2108.99   | 0.01  | 0 EGSKPDEWAQAHTFIEHK                     |
| 104 - 135   | 3376.68  | 3375.68   | 3375.60   | 0.08  | 0 SSVNSIAWAPHELGLCLACGSSDGNISVFTAR       |
| 136 - 144   | 994.42   | 993.42    | 993.42    | 0.01  | 0 SDGGWDITR                              |
| 145 - 181   | 3823.98  | 3822.98   | 3822.90   | 0.08  | 0 IDQAHVPVGVTSVSWAPAMAPGALINTGPSGQFEYVQK |
| 196 - 202   | 895.44   | 894.44    | 894.43    | 0.00  | 0 LYNGSWR                                |
| 203 - 213   | 1405.62  | 1404.62   | 1404.61   | 0.01  | 0 MDCFPALQMHR                            |
| 203 - 213   | 1421.62  | 1420.62   | 1420.60   | 0.01  | 0 MDCFPALQMHR Oxidation (M)              |
| 218 - 229   | 1280.69  | 1279.69   | 1279.69   | -0.00 | 0 DVAWAPNLGLPK                           |
| 230 - 248   | 1932.00  | 1931.00   | 1931.00   | -0.00 | 0 STIASASQDGTVVWTAPK                     |
| 249 - 256   | 990.43   | 989.42    | 989.42    | 0.00  | 0 EGEQWEGR                               |
| 257 - 267   | 1423.73  | 1422.73   | 1422.73   | -0.00 | 0 VLYDFQTPVWR                            |

Match to: gi|30089728; Score: 113

### Matched peptides:

| Start - End | Observed | Mr (expt) | Mr (calc) | Delta | Miss Sequence                                   |
|-------------|----------|-----------|-----------|-------|-------------------------------------------------|
| 7 - 27      | 2273.18  | 2272.18   | 2272.21   | -0.04 | 1 KLVIDTDPGIDDAMAIFVALR                         |
| 7 - 27      | 2289.19  | 2288.18   | 2288.21   | -0.02 | 1 KLVIDTDPGIDDAMAIFVALR Oxidation (M)           |
| 8 - 27      | 2145.09  | 2144.09   | 2144.12   | -0.03 | 0 LVVIDTDPGIDDAMAIFVALR                         |
| 8 - 27      | 2161.11  | 2160.11   | 2160.11   | -0.01 | 0 LVVIDTDPGIDDAMAIFVALR Oxidation (M)           |
| 28 - 50     | 2495.37  | 2494.37   | 2494.33   | 0.04  | 0 SPEVELLGLTTFGNVYTTLATR                        |
| 51 - 61     | 1192.67  | 1191.67   | 1191.67   | -0.00 | 0 NALHLLLEAVGR                                  |
| 62 - 75     | 1466.76  | 1465.76   | 1465.78   | -0.02 | 0 TDIPVAEGSHVTK                                 |
| 225 - 234   | 1284.67  | 1283.67   | 1283.65   | 0.01  | 0 ILGLYYDYHK                                    |
| 241 - 267   | 2888.51  | 2887.51   | 2887.48   | 0.03  | 0 GVYLHDPATLIAAVDPSLMTYTEGVVR                   |
| 241 - 267   | 2904.51  | 2903.51   | 2903.47   | 0.03  | 0 GVYLHDPATLIAAVDPSLMTYTEGVVR Oxidation (M)     |
| 276 - 284   | 981.52   | 980.52    | 980.52    | -0.00 | 0 GLTVFDTTK                                     |
| 287 - 300   | 1550.81  | 1549.80   | 1549.81   | -0.01 | 0 YGEITAWTGKPTVK                                |
| 287 - 317   | 3376.68  | 3375.68   | 3375.76   | -0.08 | 1 YGEITAWTGKPTVKVAVTVDAPAVVEMIMQR Oxidation (M) |
| 301 - 317   | 1828.95  | 1827.95   | 1827.96   | -0.01 | 0 VAVTVDAPAVVEMIMQR                             |
| 301 - 317   | 1844.95  | 1843.95   | 1843.95   | -0.00 | 0 VAVTVDAPAVVEMIMQR Oxidation (M)               |
| 301 - 317   | 1860.95  | 1859.95   | 1859.95   | -0.00 | 0 VAVTVDAPAVVEMIMQR 2 Oxidation (M)             |



## Spot 2164

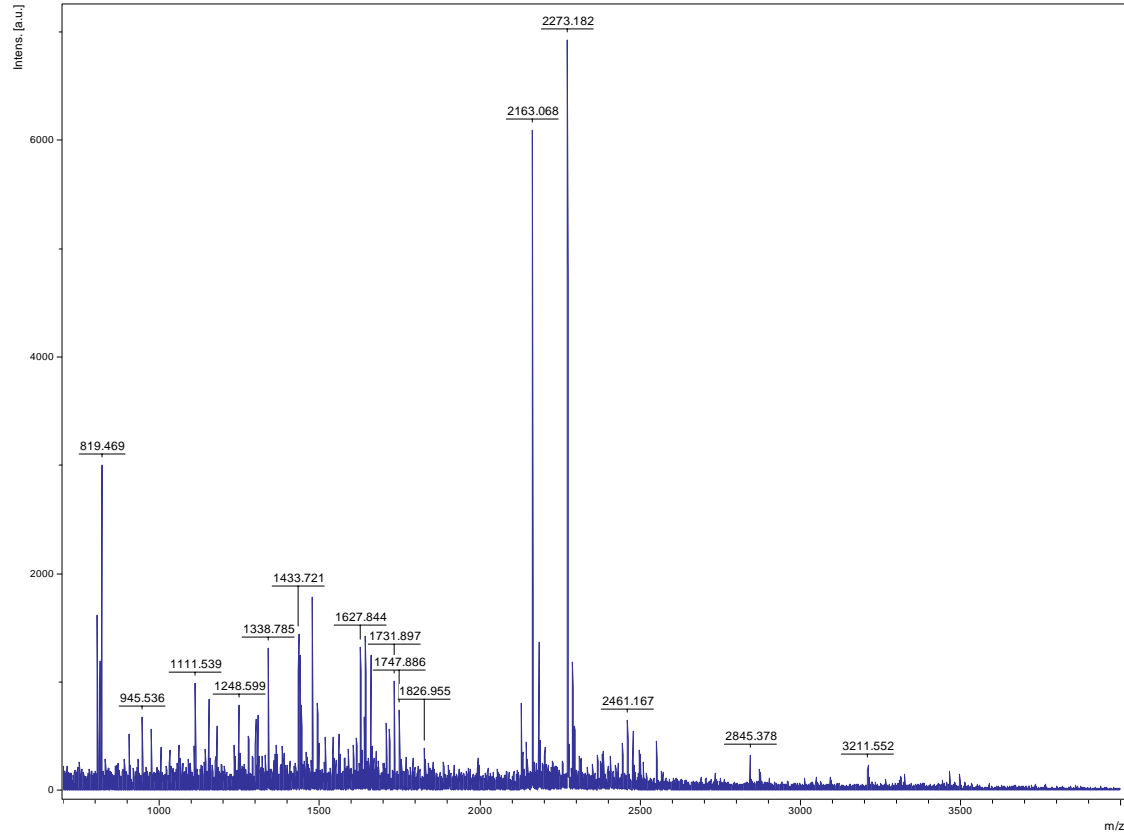

Match to: gi|6630689 Score: 91

### Matched peptides:

| Start - End | Observed  | Mr (expt) | Mr (calc) | Delta   | Miss Sequence                  |                 |
|-------------|-----------|-----------|-----------|---------|--------------------------------|-----------------|
| 45 - 66     | 2461.1672 | 2460.1600 | 2460.1374 | 0.0226  | 0 R.AGVPMMEV MGLMLGEFVDDYTVR.V | 2 Oxidation (M) |
| 138 - 150   | 1338.7845 | 1337.7773 | 1337.7918 | -0.0145 | 0 R.AVAVVIDPIQSVK.G            |                 |
| 151 - 159   | 1004.5686 | 1003.5613 | 1003.5814 | -0.0201 | 1 K.GKVVIDAFRL                 |                 |
| 153 - 159   | 819.4692  | 818.4620  | 818.4650  | -0.0030 | 0 K.VVIDAFRL                   |                 |
| 160 - 173   | 1627.8438 | 1626.8365 | 1626.8221 | 0.0143  | 0 R.LINPQTMMLGQEPR.Q           |                 |
| 160 - 173   | 1643.8348 | 1642.8276 | 1642.8171 | 0.0105  | 0 R.LINPQTMMLGQEPR.Q           | Oxidation (M)   |
| 160 - 173   | 1659.8196 | 1658.8123 | 1658.8120 | 0.0003  | 0 R.LINPQTMMLGQEPR.Q           | 2 Oxidation (M) |
| 197 - 206   | 1299.6332 | 1298.6259 | 1298.6407 | -0.0148 | 0 R.HYYSIAINYR.K               |                 |
| 223 - 230   | 945.5360  | 944.5287  | 944.5331  | -0.0044 | 0 K.WTDGLLIK.S                 |                 |
| 231 - 252   | 2550.2844 | 2549.2771 | 2549.2431 | 0.0340  | 1 K.SFDTHSKTNEQTVQEMLNLAIK.Y   | Oxidation (M)   |
| 238 - 252   | 1731.8971 | 1730.8898 | 1730.8872 | 0.0026  | 0 K.TNEQTVQEMLNLAIK.Y          |                 |
| 238 - 252   | 1747.8864 | 1746.8791 | 1746.8822 | -0.0031 | 0 K.TNEQTVQEMLNLAIK.Y          | Oxidation (M)   |
| 268 - 275   | 813.4933  | 812.4860  | 812.4868  | -0.0008 | 0 K.LAIANVGR.Q                 |                 |

## Spot 2165

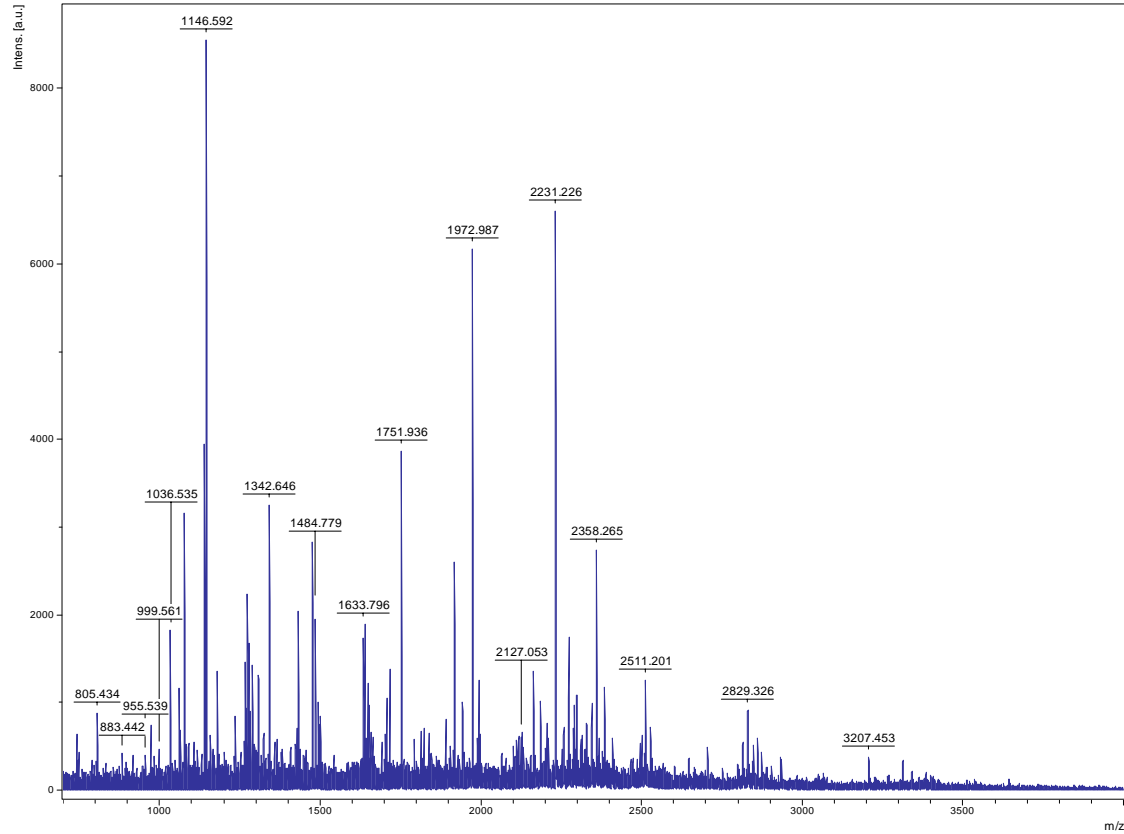

Match to: gi|74053562; Score: 103

### Matched peptides:

| Start - End | Observed | Mr (expt) | Mr (calc) | Delta | Miss Sequence                        |
|-------------|----------|-----------|-----------|-------|--------------------------------------|
| 3 - 19      | 1822.93  | 1821.93   | 1821.92   | 0.01  | 0 EILHIQGGQCGNQIGAK                  |
| 20 - 35     | 1942.89  | 1941.89   | 1941.87   | 0.02  | 0 FWEVICDEHGIDHTGK                   |
| 36 - 46     | 1282.62  | 1281.61   | 1281.58   | 0.03  | 0 YSGSDLQLER                         |
| 47 - 58     | 1342.65  | 1341.64   | 1341.63   | 0.01  | 0 INVYYNEASGGR                       |
| 63 - 77     | 1633.80  | 1632.79   | 1632.79   | 0.01  | 0 AVLMIDLEPGTMDSVR                   |
| 63 - 77     | 1649.80  | 1648.80   | 1648.78   | 0.02  | 0 AVLMIDLEPGTMDSVR Oxidation (M)     |
| 78 - 103    | 2814.31  | 2813.31   | 2813.33   | -0.02 | 0 SGPYGQIFRPDNFVFGQSGAGNNWAK         |
| 104 - 121   | 1972.99  | 1971.99   | 1971.99   | -0.00 | 0 GHYTEGAELIDSVLDVVR                 |
| 155 - 162   | 1077.54  | 1076.54   | 1076.53   | 0.02  | 1 IREYYPDR                           |
| 242 - 251   | 1146.59  | 1145.59   | 1145.58   | 0.01  | 0 FPGQLNSDLR                         |
| 252 - 262   | 1267.78  | 1266.78   | 1266.78   | -0.00 | 1 KLAVNLIPFPR                        |
| 253 - 262   | 1139.69  | 1138.69   | 1138.69   | 0.00  | 0 LAVNLIPFPR                         |
| 263 - 282   | 2358.27  | 2357.26   | 2357.17   | 0.09  | 1 LHFFMVGFAPLTSRGSQQYR Oxidation (M) |
| 298 - 309   | 1431.64  | 1430.64   | 1430.60   | 0.04  | 1 NMMCAADPRHGR Oxidation (M)         |

## Spot 2166

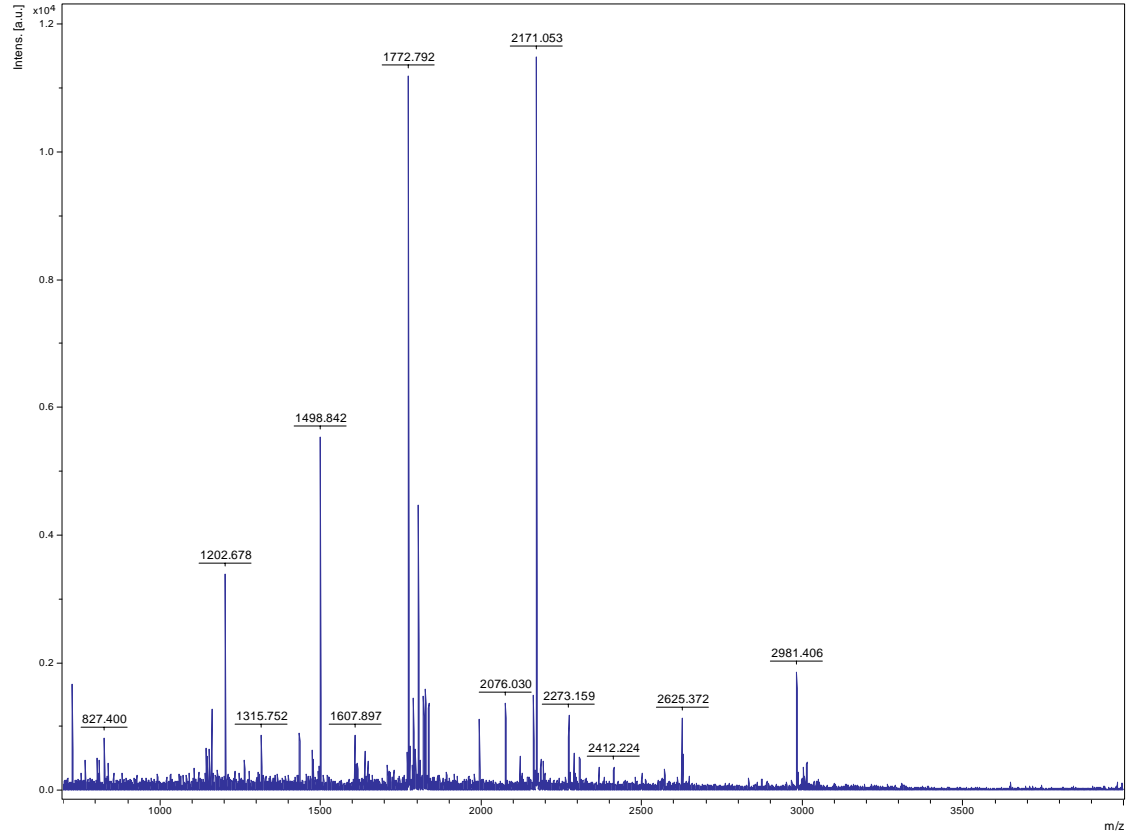

Match to: gi|84028207; Score: 136

### Matched peptides:

| Start - End | Observed | Mr (expt) | Mr (calc) | Delta | Miss Sequence                           |
|-------------|----------|-----------|-----------|-------|-----------------------------------------|
| 83 - 109    | 2981.41  | 2980.40   | 2980.40   | 0.01  | 1 NPDEIPWAEAGAEYVVESTGVFTDKEK           |
| 165 - 188   | 2625.37  | 2624.37   | 2624.36   | -0.01 | 0 VIHDNFGIIEGLMTTVHAIATQK Oxidation (M) |
| 203 - 217   | 1434.75  | 1433.75   | 1433.75   | -0.00 | 0 AASFNIIPSTGAAK                        |
| 222 - 236   | 1647.85  | 1646.85   | 1646.88   | -0.03 | 1 VLPDLNGKLTGMSFR                       |
| 230 - 236   | 811.40   | 810.40    | 810.41    | -0.00 | 0 LTGMSFR                               |
| 230 - 236   | 827.40   | 826.40    | 826.40    | -0.00 | 0 LTGMSFR Oxidation (M)                 |
| 230 - 250   | 2307.22  | 2306.22   | 2306.23   | -0.01 | 1 LTGMSFRVPTVDVSVVDLTVR Oxidation (M)   |
| 237 - 250   | 1498.84  | 1497.84   | 1497.84   | -0.00 | 0 VPTVDVSVVDLTVR                        |
| 254 - 261   | 838.43   | 837.43    | 837.42    | 0.01  | 0 AASYDAIK                              |
| 272 - 293   | 2412.22  | 2411.22   | 2411.22   | -0.00 | 1 LKGIIGYVEEDLVSTDFVGDGR                |
| 274 - 293   | 2171.05  | 2170.05   | 2170.04   | 0.01  | 0 GIIGYVEEDLVSTDFVGDGR                  |
| 301 - 311   | 1161.61  | 1160.61   | 1160.62   | -0.01 | 0 AGIALNDNFVK                           |
| 312 - 325   | 1772.79  | 1771.79   | 1771.80   | -0.01 | 0 LVAWYDNEWGYSNR                        |

## Spot 2171

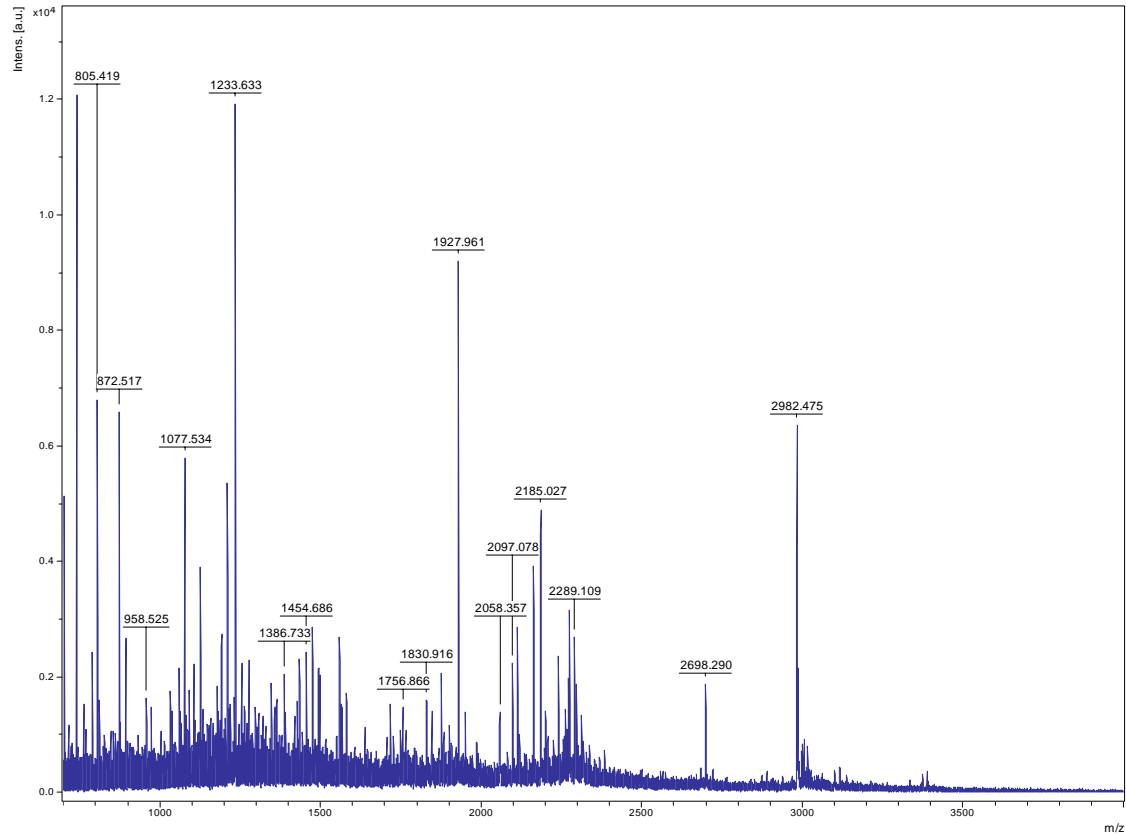

Match to: gi|52077303; Score: 121

### Matched peptides:

| Start - End | Observed | Mr (expt) | Mr (calc) | Delta | Miss Sequence                         |
|-------------|----------|-----------|-----------|-------|---------------------------------------|
| 32 - 47     | 1927.96  | 1926.96   | 1926.97   | -0.01 | 0 SEPLYQYVLESTVFPR                    |
| 32 - 53     | 2698.29  | 2697.29   | 2697.31   | -0.02 | 1 SEPLYQYVLESTVFPREPDCLR              |
| 113 - 120   | 872.52   | 871.51    | 871.51    | -0.00 | 0 IV AIDVSR                           |
| 113 - 133   | 2275.16  | 2274.16   | 2274.17   | -0.02 | 1 IV AIDVSRESYDEVGAPVIDK              |
| 121 - 133   | 1421.67  | 1420.67   | 1420.67   | -0.00 | 0 ESYDEVGAPVIDK                       |
| 144 - 161   | 1899.94  | 1898.94   | 1898.97   | -0.03 | 0 VGLAMPVLDDELVAEEGNK Oxidation (M)   |
| 144 - 163   | 2097.08  | 2096.08   | 2096.09   | -0.02 | 1 VGLAMPVLDDELVAEEGNKGR               |
| 144 - 163   | 2113.07  | 2112.07   | 2112.09   | -0.02 | 1 VGLAMPVLDDELVAEEGNKGR Oxidation (M) |
| 174 - 182   | 1134.55  | 1133.55   | 1133.56   | -0.01 | 0 VNFLGYHER                           |
| 189 - 219   | 2982.48  | 2981.47   | 2981.49   | -0.02 | 0 VGGLIAYDNTLWGGSSVAAPPAADAEVPSGR     |
| 229 - 238   | 1077.53  | 1076.53   | 1076.53   | 0.01  | 0 EFNAIAADR                           |
| 229 - 239   | 1233.63  | 1232.63   | 1232.63   | 0.00  | 1 EFNAIAADRR                          |
| 240 - 255   | 1830.92  | 1829.91   | 1829.93   | -0.02 | 0 VKPCQLAIADGVMLCR                    |
| 240 - 255   | 1846.92  | 1845.92   | 1845.93   | -0.00 | 0 VKPCQLAIADGVMLCR Oxidation (M)      |

## Spot 2178

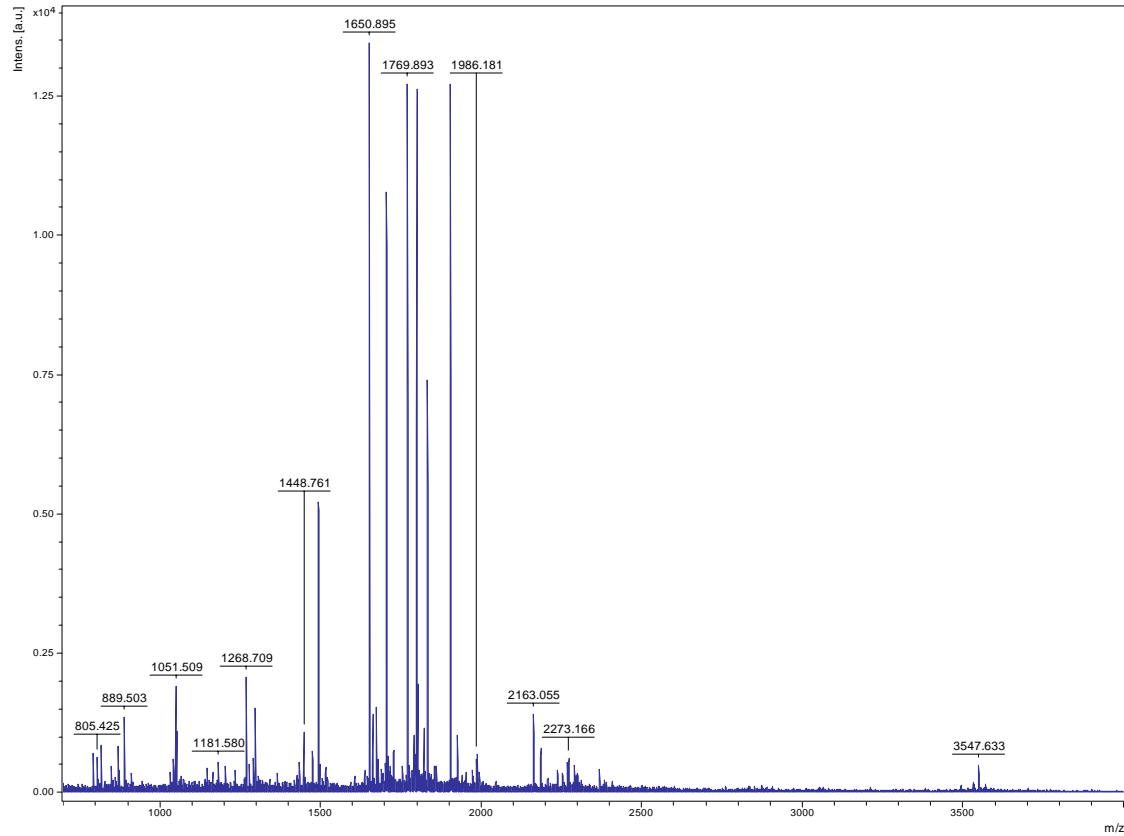

Match to: gj|46359906; Score: 186

### Matched peptides:

| Start - End | Observed | Mr (expt) | Mr (calc) | Delta | Miss Sequence                                  |
|-------------|----------|-----------|-----------|-------|------------------------------------------------|
| 21 - 35     | 1769.89  | 1768.89   | 1768.88   | 0.01  | 0 VEAVVFNICDSYVR                               |
| 36 - 42     | 871.44   | 870.44    | 870.43    | 0.01  | 0 RPDQAER                                      |
| 43 - 60     | 1833.07  | 1832.07   | 1832.05   | 0.01  | 0 VIGTLGSLPDGTVHVR                             |
| 61 - 90     | 3547.63  | 3546.63   | 3546.60   | 0.03  | 0 NSYVVPHNESPDQVALDIEYHHNMYASHHK Oxidation (M) |
| 121 - 136   | 1799.94  | 1798.93   | 1798.92   | 0.01  | 0 EVQSPIHLTVDTGFR                              |
| 143 - 154   | 1295.67  | 1294.67   | 1294.65   | 0.02  | 0 AYSSNLSLGDRL                                 |
| 155 - 168   | 1650.89  | 1649.89   | 1649.89   | 0.00  | 0 HLAAQFQEPLDLR                                |
| 175 - 187   | 1448.76  | 1447.76   | 1447.83   | -0.07 | 1 VGFILKSTIVEK                                 |
| 182 - 201   | 2237.09  | 2236.08   | 2236.06   | 0.02  | 1 STIVEKLPNDLEGMESSMEK                         |
| 182 - 201   | 2269.05  | 2268.05   | 2268.05   | -0.00 | 1 STIVEKLPNDLEGMESSMEK 2 Oxidation (M)         |
| 202 - 211   | 1268.71  | 1267.71   | 1267.71   | 0.00  | 0 LYVLIDEIYK                                   |
| 212 - 220   | 1051.51  | 1050.51   | 1050.50   | 0.01  | 0 YVDDVVEGR                                    |
| 230 - 240   | 1181.58  | 1180.58   | 1180.58   | -0.00 | 0 FISDAVASMPK Oxidation (M)                    |
| 241 - 248   | 848.47   | 847.47    | 847.44    | 0.02  | 0 LSPAADFQ                                     |
| 254 - 268   | 1705.95  | 1704.95   | 1704.94   | 0.01  | 0 IQDNLALVYLSITR                               |
| 269 - 276   | 889.50   | 888.50    | 888.49    | 0.01  | 0 TQISIAEK                                     |

## Spot 2189

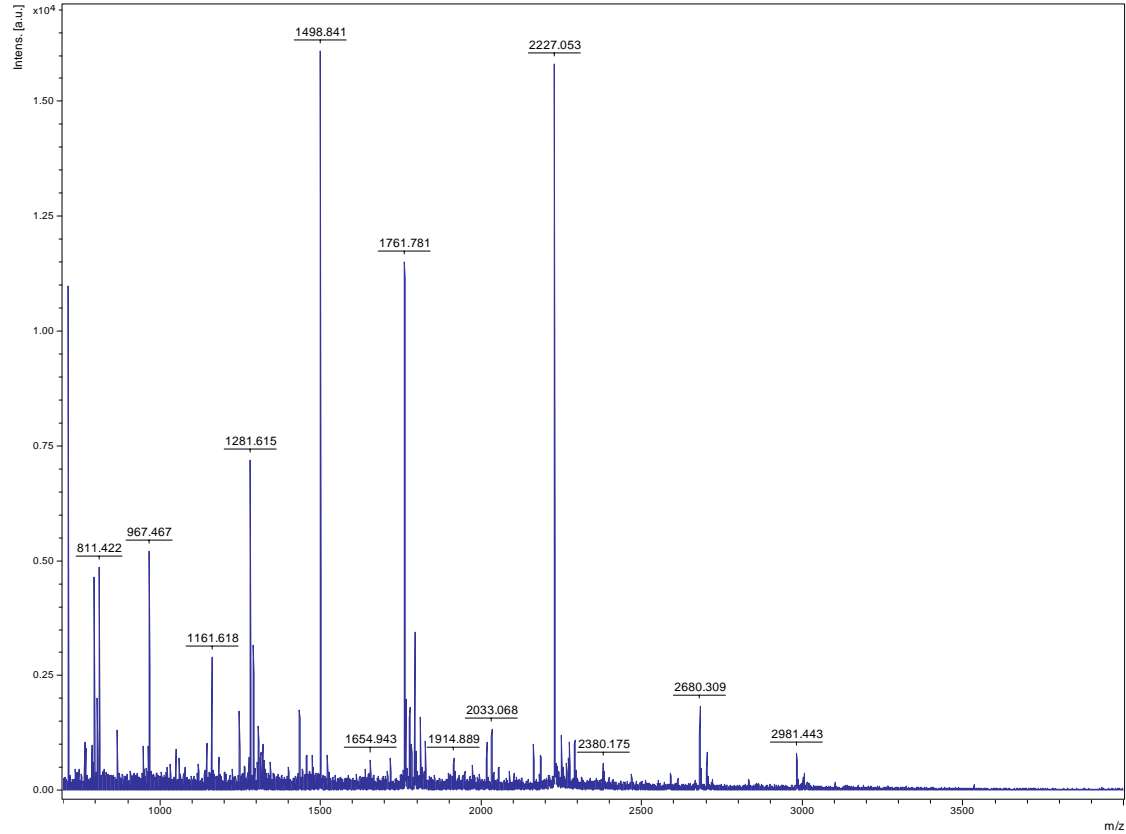

Match to: gi|38346061; Score: 160

### Matched peptides:

| Start - End | Observed | Mr (expt) | Mr (calc) | Delta | Miss Sequence                          |
|-------------|----------|-----------|-----------|-------|----------------------------------------|
| 75 - 82     | 967.47   | 966.47    | 966.46    | 0.01  | 0 EVTVFGCR                             |
| 83 - 109    | 2981.44  | 2980.44   | 2980.40   | 0.04  | 1 NPEEIPWGETGAEFVVVESTGVFTDKDK         |
| 129 - 140   | 1305.66  | 1304.65   | 1304.64   | 0.01  | 0 DAPMFVVGVNEK                         |
| 129 - 140   | 1321.65  | 1320.65   | 1320.64   | 0.01  | 0 DAPMFVVGVNEK Oxidation (M)           |
| 141 - 164   | 2680.31  | 2679.31   | 2679.29   | 0.02  | 0 EYKPDIDIVSNASCTTNCLAPLAK             |
| 170 - 188   | 2017.08  | 2016.08   | 2016.07   | 0.01  | 0 FGIVEGLMTTVHAITATQK                  |
| 170 - 188   | 2033.07  | 2032.07   | 2032.07   | -0.00 | 0 FGIVEGLMTTVHAITATQK Oxidation (M)    |
| 189 - 199   | 1247.60  | 1246.60   | 1246.59   | 0.00  | 1 TVDGPSSKDWK                          |
| 203 - 217   | 1434.75  | 1433.75   | 1433.75   | -0.01 | 0 AASFNIIPSSTGAAK                      |
| 230 - 236   | 811.42   | 810.42    | 810.41    | 0.01  | 0 LTGMAFR Oxidation (M)                |
| 230 - 250   | 2291.24  | 2290.24   | 2290.24   | 0.01  | 1 LTGMAFRVPTVDVSVVDTLTVR Oxidation (M) |
| 237 - 250   | 1498.84  | 1497.84   | 1497.84   | -0.00 | 0 VPTVDVSVVDTLTVR                      |
| 251 - 261   | 1291.68  | 1290.68   | 1290.68   | -0.01 | 0 LEKPASYDQIK                          |
| 274 - 293   | 2227.05  | 2226.05   | 2226.04   | 0.01  | 0 GILGYVEEDLVSTDFQGDNR                 |
| 301 - 311   | 1161.62  | 1160.62   | 1160.62   | -0.00 | 0 AGIALDNDFVK                          |
| 312 - 325   | 1761.78  | 1760.78   | 1760.78   | -0.00 | 0 LVSWYDNEWGYSSR                       |
| 332 - 337   | 809.32   | 808.32    | 808.32    | 0.00  | 0 HMYNTQ Oxidation (M)                 |

## Spot 2190

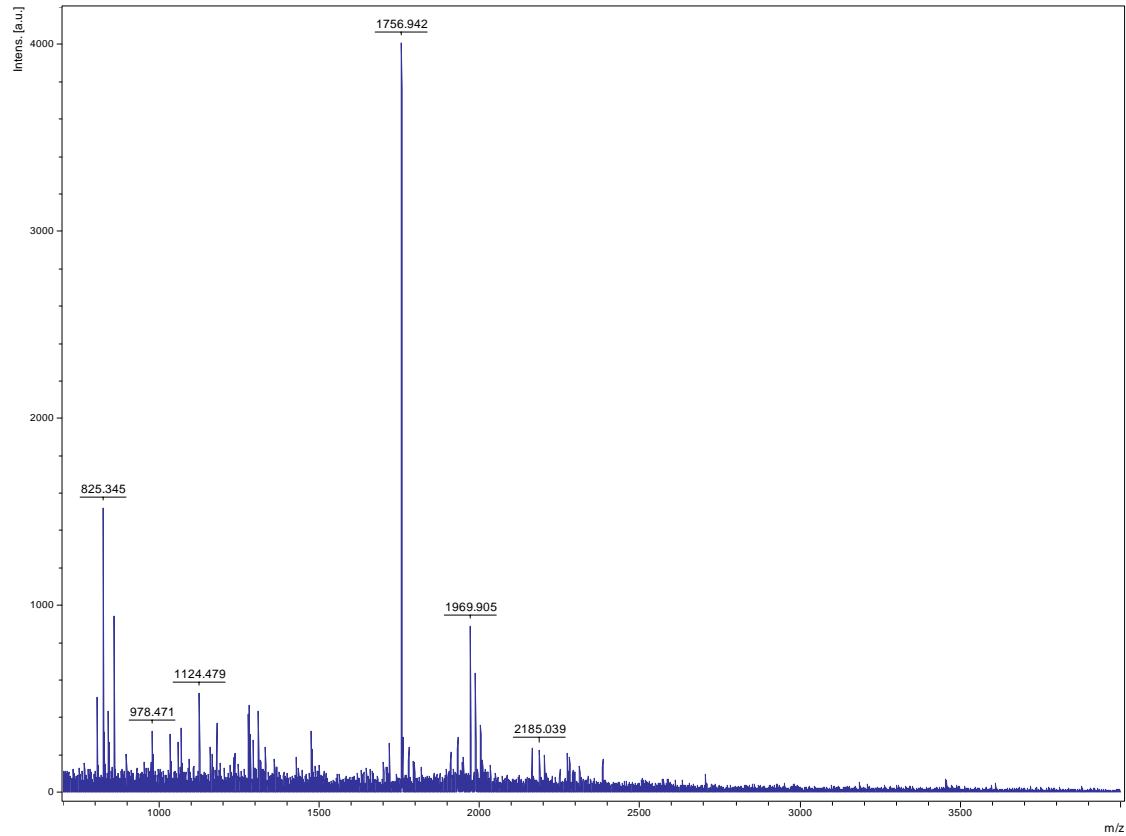

Match to: gi|50947283; Score: 78

### Matched peptides:

| Start - End | Observed | Mr (expt) | Mr (calc) | Delta | Miss Sequence                    |
|-------------|----------|-----------|-----------|-------|----------------------------------|
| 57 - 66     | 1069.51  | 1068.51   | 1068.52   | -0.01 | 0 TAIHSNDSPK                     |
| 71 - 86     | 1969.90  | 1968.90   | 1968.91   | -0.00 | 0 SESLHEYMLNTMVYPR               |
| 71 - 86     | 1985.90  | 1984.90   | 1984.90   | -0.01 | 0 SESLHEYMLNTMVYPR Oxidation (M) |
| 87 - 92     | 825.35   | 824.34    | 824.35    | -0.01 | 0 ENEFMR                         |
| 87 - 92     | 841.35   | 840.34    | 840.34    | 0.00  | 0 ENEFMR Oxidation (M)           |
| 152 - 159   | 858.49   | 857.49    | 857.50    | -0.01 | 0 VVAIDVSR                       |
| 212 - 220   | 1124.48  | 1123.48   | 1123.47   | 0.01  | 0 GNYGEYHER                      |
| 274 - 289   | 1756.94  | 1755.94   | 1755.92   | 0.02  | 0 VEAVQLPVSDGITLCR               |

## Spot 2193

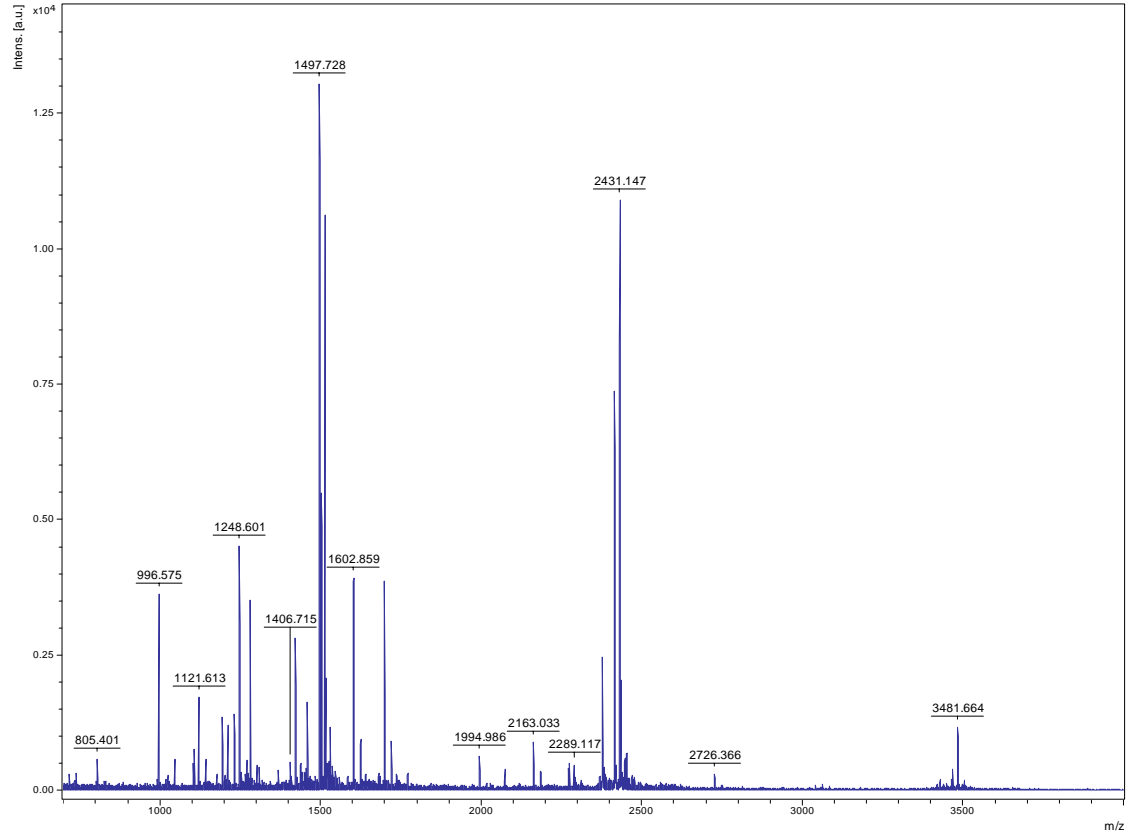

Match to: gj|84029333; Score: 157

### Matched peptides:

| Start - End | Observed | Mr (expt) | Mr (calc) | Delta | Miss Sequence                                  |
|-------------|----------|-----------|-----------|-------|------------------------------------------------|
| 41 - 49     | 1195.44  | 1194.44   | 1194.45   | -0.01 | 0 CYTECFGMK                                    |
| 41 - 49     | 1211.44  | 1210.44   | 1210.45   | -0.01 | 0 CYTECFGMK Oxidation (M)                      |
| 88 - 106    | 2073.96  | 2072.96   | 2072.98   | -0.03 | 0 YDIGAGFGHFAIATEDVYK                          |
| 119 - 127   | 996.57   | 995.57    | 995.58    | -0.00 | 1 ITREPGPVK                                    |
| 128 - 149   | 2415.14  | 2414.14   | 2414.16   | -0.02 | 0 GGSTVIAFAQDPDGYMFELIQR                       |
| 128 - 149   | 2431.15  | 2430.15   | 2430.15   | -0.01 | 0 GGSTVIAFAQDPDGYMFELIQR Oxidation (M)         |
| 150 - 162   | 1497.73  | 1496.73   | 1496.75   | -0.02 | 0 GPTPEPLCQVMLR                                |
| 150 - 162   | 1513.73  | 1512.73   | 1512.74   | -0.02 | 0 GPTPEPLCQVMLR Oxidation (M)                  |
| 192 - 221   | 3465.65  | 3464.65   | 3464.66   | -0.01 | 1 YTIAMLGVADEDKTTVIELTYNYGVTEYTK               |
| 192 - 221   | 3481.66  | 3480.66   | 3480.65   | -0.01 | 1 YTIAMLGVADEDKTTVIELTYNYGVTEYTK Oxidation (M) |
| 205 - 221   | 1994.99  | 1993.98   | 1993.99   | -0.00 | 0 TTIELTYNYGVTEYTK                             |
| 222 - 237   | 1698.82  | 1697.81   | 1697.83   | -0.01 | 0 GNAYAQVAIGTEDVYK                             |
| 222 - 247   | 2726.37  | 2725.36   | 2725.38   | -0.02 | 1 GNAYAQVAIGTEDVYKSAEAVELVTK                   |
| 238 - 247   | 1046.56  | 1045.55   | 1045.57   | -0.01 | 0 SAEAVELVTK                                   |
| 253 - 266   | 1503.87  | 1502.87   | 1502.89   | -0.02 | 1 ILRQGPLPGLNTK                                |
| 256 - 266   | 1104.58  | 1103.58   | 1103.60   | -0.02 | 0 QPGPLPGLNTK Pyro-glu (N-term Q)              |
| 256 - 266   | 1121.61  | 1120.61   | 1120.62   | -0.01 | 0 QPGPLPGLNTK                                  |
| 267 - 277   | 1248.60  | 1247.60   | 1247.62   | -0.02 | 0 IASFLDPDGWK                                  |
| 278 - 291   | 1602.86  | 1601.86   | 1601.87   | -0.01 | 1 VVLVDNADFLKELQ                               |



## Spot 2195

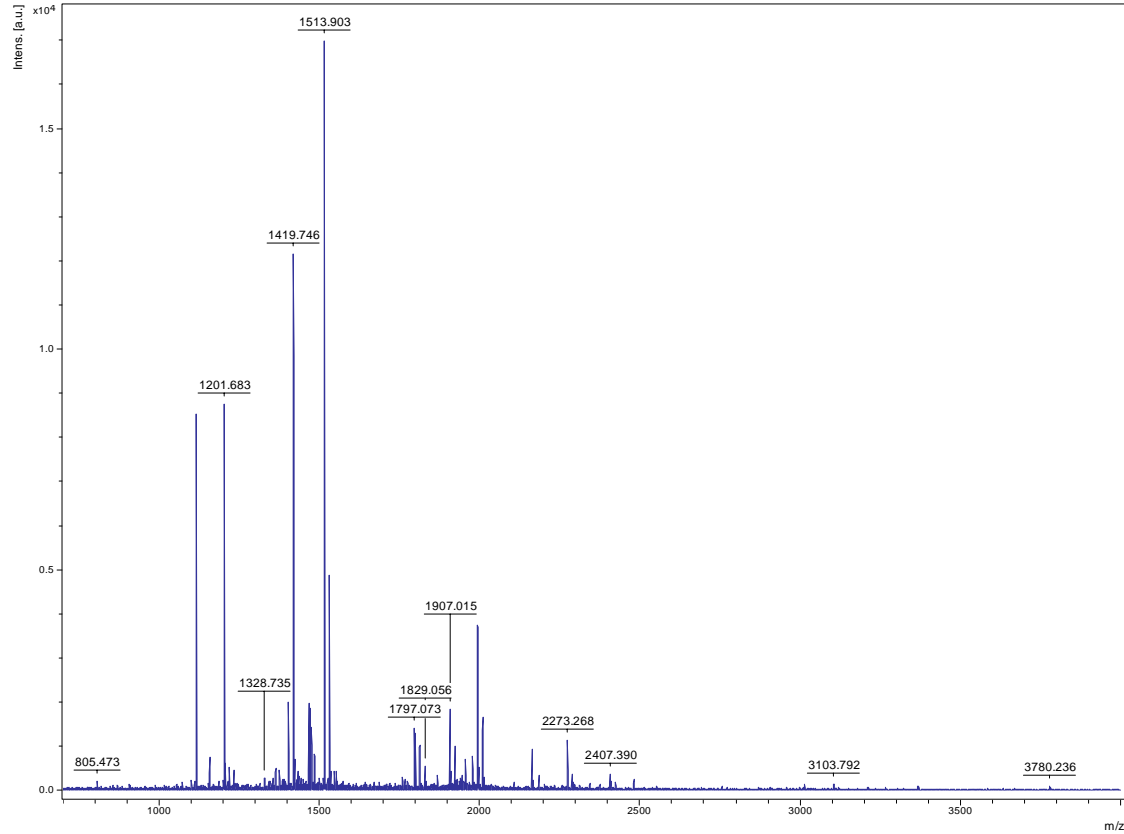

Match to: gi|4105683 Score: 98

### Matched peptides:

| Start - End | Observed  | Mr (expt) | Mr (calc) | Delta  | Miss Sequence            |                                          |
|-------------|-----------|-----------|-----------|--------|--------------------------|------------------------------------------|
| 55 - 70     | 2009.9651 | 2008.9578 | 2008.8632 | 0.0946 | 0 R.QVEAHHFCAHLNEDMR.Q   | Carbamidomethyl (C); Oxidation (M)       |
| 71 - 83     | 1362.7078 | 1361.7005 | 1361.6397 | 0.0607 | 0 R.QCLIFDGPDAGAR.L      |                                          |
| 71 - 83     | 1402.7122 | 1401.7049 | 1401.6347 | 0.0702 | 0 R.QCLIFDGPDAGAR.L      | Carbamidomethyl (C); Pyro-glu (N-term Q) |
| 71 - 83     | 1419.7456 | 1418.7383 | 1418.6612 | 0.0771 | 0 R.QCLIFDGPDAGAR.L      | Carbamidomethyl (C)                      |
| 116 - 130   | 1513.9025 | 1512.8952 | 1512.8122 | 0.0830 | 0 K.GGVLFMPGVPGVVER.R    |                                          |
| 116 - 130   | 1529.9010 | 1528.8937 | 1528.8071 | 0.0866 | 0 K.GGVLFMPGVPGVVER.R    | Oxidation (M)                            |
| 143 - 151   | 1201.6826 | 1200.6753 | 1200.6040 | 0.0714 | 0 K.THFWQVDR.G           |                                          |
| 152 - 168   | 1797.0734 | 1796.0661 | 1795.9688 | 0.0973 | 0 R.GDALPLGLPQIMMALTR.D  |                                          |
| 152 - 168   | 1813.0580 | 1812.0507 | 1811.9637 | 0.0870 | 0 R.GDALPLGLPQIMMALTR.D  | Oxidation (M)                            |
| 152 - 168   | 1829.0562 | 1828.0489 | 1827.9586 | 0.0902 | 0 R.GDALPLGLPQIMMALTR.D  | 2 Oxidation (M)                          |
| 174 - 183   | 1233.6860 | 1232.6788 | 1232.6070 | 0.0717 | 1 R.QELAKCVEEK.F         | Carbamidomethyl (C)                      |
| 184 - 192   | 1114.6202 | 1113.6130 | 1113.5454 | 0.0675 | 1 K.FSVSFDKER.E          |                                          |
| 196 - 214   | 1907.0154 | 1906.0081 | 1905.9155 | 0.0926 | 0 R.AYMSGPDHGHPLANAAGK.G |                                          |
| 196 - 214   | 1923.0076 | 1922.0003 | 1921.9104 | 0.0899 | 0 R.AYMSGPDHGHPLANAAGK.G | Oxidation (M)                            |
| 222 - 235   | 1468.8084 | 1467.8011 | 1467.7140 | 0.0871 | 0 R.EVDLPAMTTAHAGR.V     |                                          |
| 222 - 235   | 1484.7988 | 1483.7916 | 1483.7089 | 0.0827 | 0 R.EVDLPAMTTAHAGR.V     | Oxidation (M)                            |

### Spot 2200

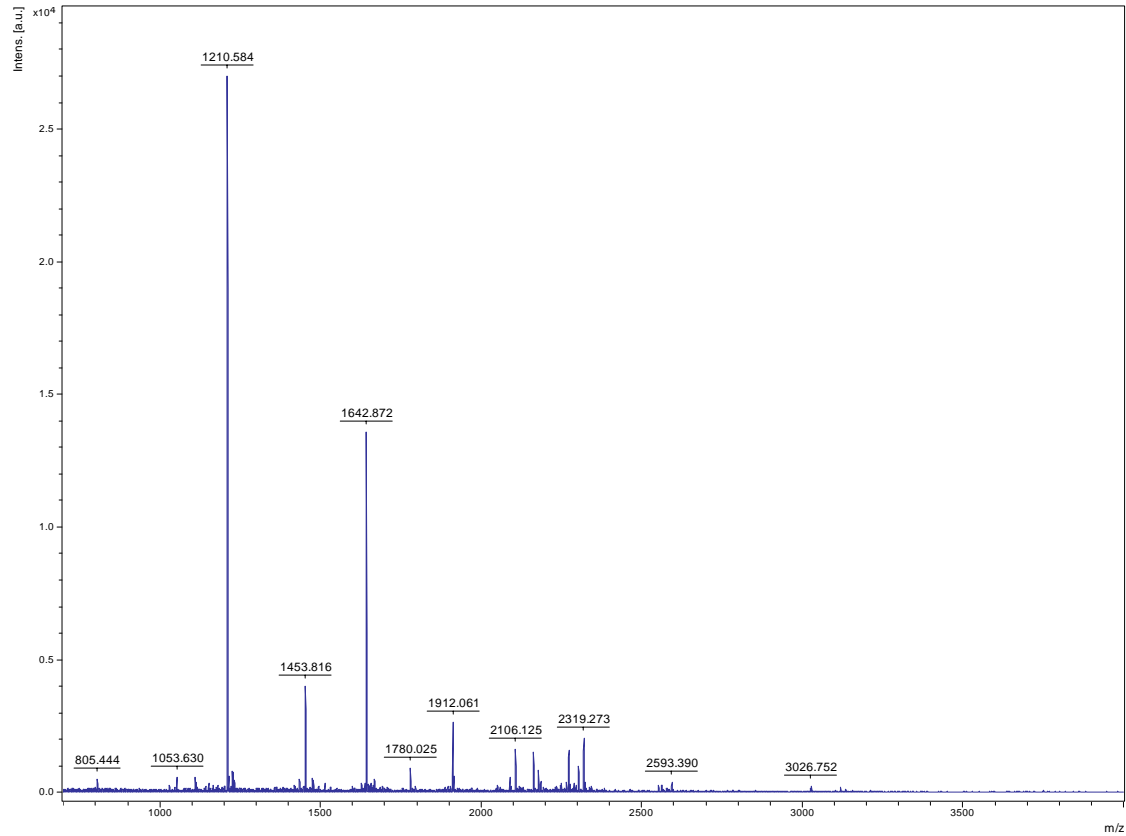

Match to: gi|14192878 Score: 88

#### Matched peptides:

| Start - End | Observed  | Mr (expt) | Mr (calc) | Delta   | Miss Sequence                     |
|-------------|-----------|-----------|-----------|---------|-----------------------------------|
| 95 - 112    | 1912.0607 | 1911.0534 | 1911.0438 | 0.0096  | 1 R.LRSPAAEALGPTHVLHSR.Y          |
| 97 - 112    | 1642.8718 | 1641.8646 | 1641.8587 | 0.0059  | 0 R.SPAAEALGPTHVLHSR.Y            |
| 171 - 183   | 1453.8158 | 1452.8085 | 1452.8187 | -0.0102 | 1 K.VKGEVVPQLVEK.V                |
| 173 - 183   | 1226.6516 | 1225.6443 | 1225.6553 | -0.0110 | 0 K.EGVEVPQLVEK.V                 |
| 184 - 195   | 1030.5475 | 1029.5402 | 1029.5454 | -0.0052 | 0 K.VAAATAAAGEAK.G                |
| 199 - 209   | 1210.5836 | 1209.5763 | 1209.5778 | -0.0014 | 0 R.VSFGENFSPAR.A                 |
| 212 - 235   | 2562.1711 | 2561.1639 | 2561.1631 | 0.0008  | 0 K.GYQFGMVAVFDSVEELDAVEGDGK.V    |
| 241 - 270   | 3026.7522 | 3025.7449 | 3025.6851 | 0.0598  | 0 K.AAVRPLLDEVLVDFVVGPAAVEAPANL.- |

## Spot 2201

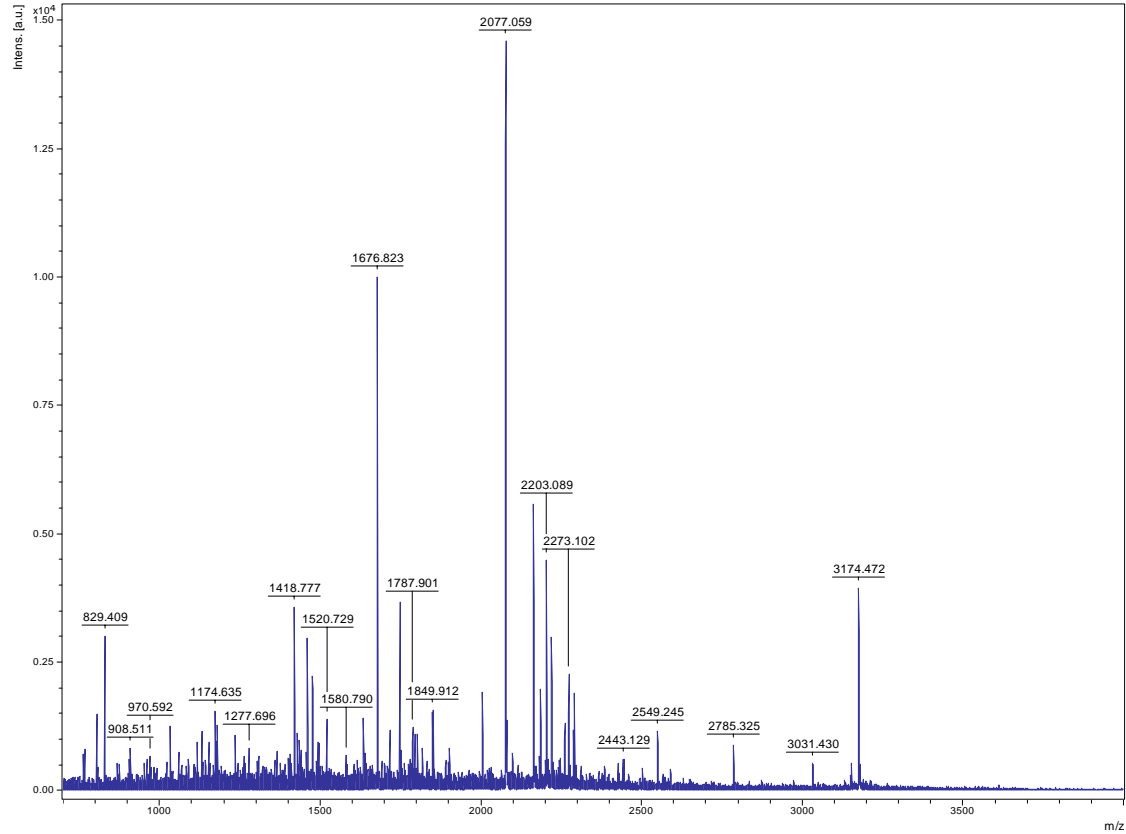

Match to: gi|78099751; Score: 91

### Matched peptides:

| Start - End | Observed | Mr (expt) | Mr (calc) | Delta | Miss Sequence                 |
|-------------|----------|-----------|-----------|-------|-------------------------------|
| 8 - 14      | 908.51   | 907.51    | 907.50    | 0.01  | 1 YKDELIK                     |
| 40 - 52     | 1520.73  | 1519.73   | 1519.73   | 0.00  | 0 FASINVENVEENR               |
| 40 - 53     | 1676.82  | 1675.82   | 1675.83   | -0.01 | 1 FASINVENVEENRR              |
| 85 - 94     | 1117.63  | 1116.63   | 1116.62   | 0.01  | 0 DGGPFVDVLK                  |
| 95 - 103    | 869.52   | 868.52    | 868.50    | 0.01  | 0 EGGVLPGIK                   |
| 117 - 129   | 1457.71  | 1456.71   | 1456.69   | 0.02  | 1 ETTTQGHDDLKGR               |
| 133 - 139   | 829.41   | 828.41    | 828.38    | 0.03  | 0 YYEAGAR                     |
| 149 - 168   | 2077.06  | 2076.06   | 2076.10   | -0.04 | 0 IGPNEPSQLAIDLNAQGLAR        |
| 169 - 196   | 3174.47  | 3173.47   | 3173.61   | -0.14 | 0 YAICQENGLVPIVEPEILVDGPHDIDR |
| 197 - 210   | 1632.78  | 1631.78   | 1631.77   | 0.01  | 0 CAYVSEVLAACYK               |
| 318 - 325   | 905.48   | 904.48    | 904.52    | -0.05 | 1 ARAAFLTR                    |

## Spot 2204

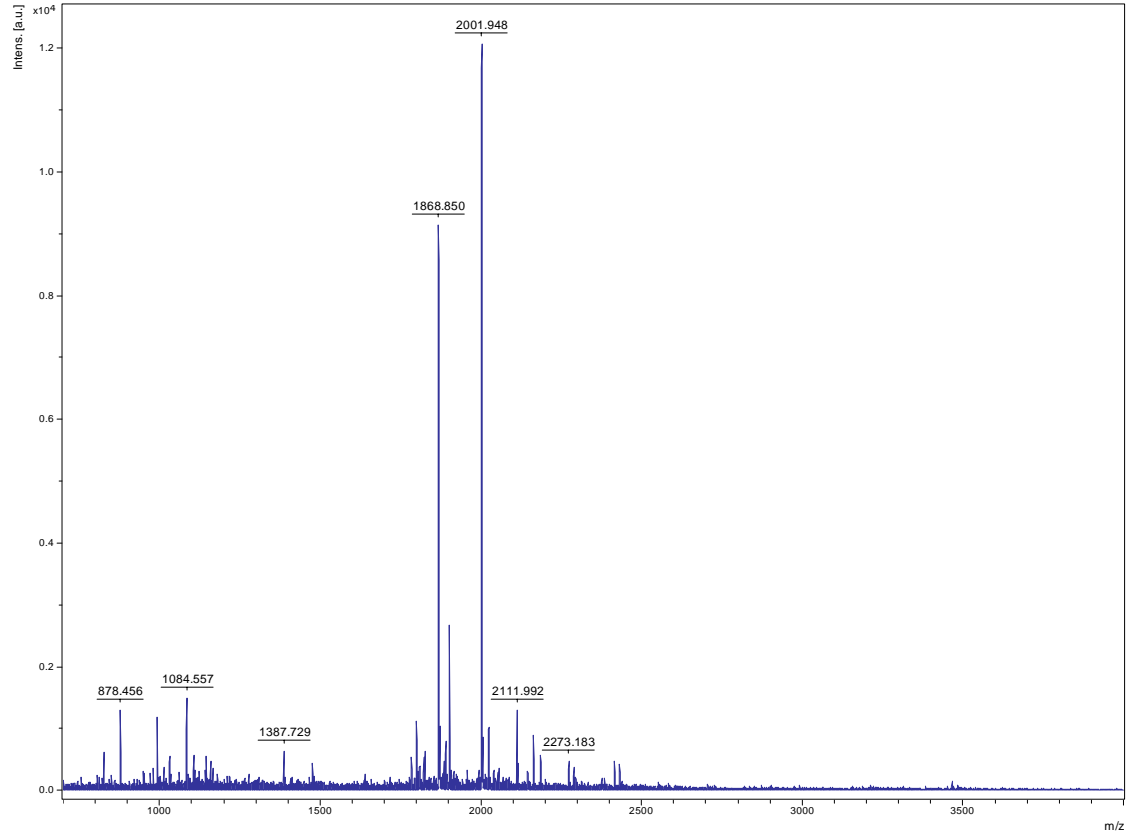

Match to: gj|12229919; Score: 133

### Matched peptides:

| Start - End | Observed | Mr (expt) | Mr (calc) | Delta | Miss Sequence                    |
|-------------|----------|-----------|-----------|-------|----------------------------------|
| 21 - 29     | 1084.56  | 1083.55   | 1083.56   | -0.01 | 0 VFQVEYATK                      |
| 30 - 41     | 1159.65  | 1158.64   | 1158.62   | 0.02  | 0 AVDNSGTVVGIK                   |
| 102 - 110   | 991.57   | 990.57    | 990.54    | 0.03  | 0 VYGEPISVK                      |
| 144 - 159   | 1783.87  | 1782.87   | 1782.85   | 0.02  | 0 DGPQLYMIEPSGVSYK               |
| 144 - 159   | 1799.87  | 1798.87   | 1798.84   | 0.02  | 0 DGPQLYMIEPSGVSYK Oxidation (M) |
| 160 - 167   | 826.47   | 825.47    | 825.44    | 0.03  | 0 YFGAALGK                       |
| 181 - 187   | 878.46   | 877.45    | 877.43    | 0.02  | 0 LSELTCT                        |
| 196 - 205   | 1144.61  | 1143.61   | 1143.59   | 0.02  | 0 IYGVHDEAK                      |
| 196 - 207   | 1387.73  | 1386.73   | 1386.71   | 0.01  | 1 IYGVHDEAKDK                    |
| 206 - 222   | 2111.99  | 2110.99   | 2110.96   | 0.03  | 1 DKAFELLESWICDESNR              |
| 208 - 222   | 1868.85  | 1867.85   | 1867.84   | 0.01  | 0 AFELELSWICDESNR                |
| 227 - 236   | 1083.60  | 1082.59   | 1082.60   | -0.00 | 0 VPADLLEQAK                     |

## Spot 2206

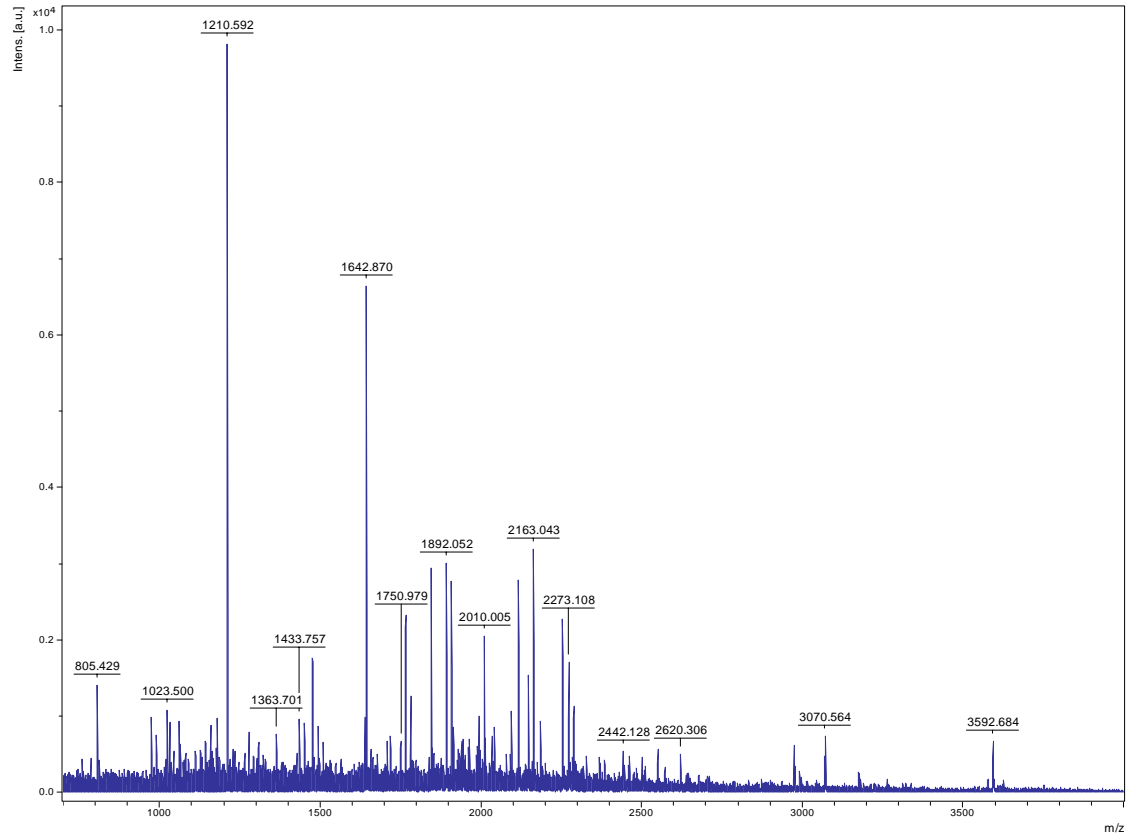

Match to: gi|51965092; Score: 80

Matched peptides:

| Start - End | Observed | Mr (expt) | Mr (calc) | Delta | Miss Sequence                       |
|-------------|----------|-----------|-----------|-------|-------------------------------------|
| 16 - 23     | 974.53   | 973.52    | 973.50    | 0.02  | 0 AMVEQLQR                          |
| 16 - 23     | 990.52   | 989.52    | 989.50    | 0.02  | 0 AMVEQLQR Oxidation (M)            |
| 32 - 41     | 1161.60  | 1160.60   | 1160.59   | 0.01  | 0 VAQVMETIDR                        |
| 88 - 111    | 2442.13  | 2441.13   | 2441.17   | -0.05 | 0 ALDVGSGTGYLTACFAIMVGPGR           |
| 112 - 130   | 2035.08  | 2034.08   | 2034.10   | -0.02 | 0 AVGVEHIPELVTSSIENIK               |
| 112 - 131   | 2163.04  | 2162.04   | 2162.19   | -0.15 | 1 AVGVEHIPELVTSSIENIKK              |
| 132 - 151   | 2010.00  | 2009.00   | 2009.02   | -0.02 | 0 SAAAPQLTDGSLSIHTDGR               |
| 152 - 185   | 3592.68  | 3591.68   | 3591.88   | -0.20 | 0 EGWPELAPYDAIHVGAAPQIPQALIEQLKPGGR |
| 208 - 217   | 1145.63  | 1144.62   | 1144.62   | 0.00  | 1 VSIRDETAVR                        |

## Spot 2209

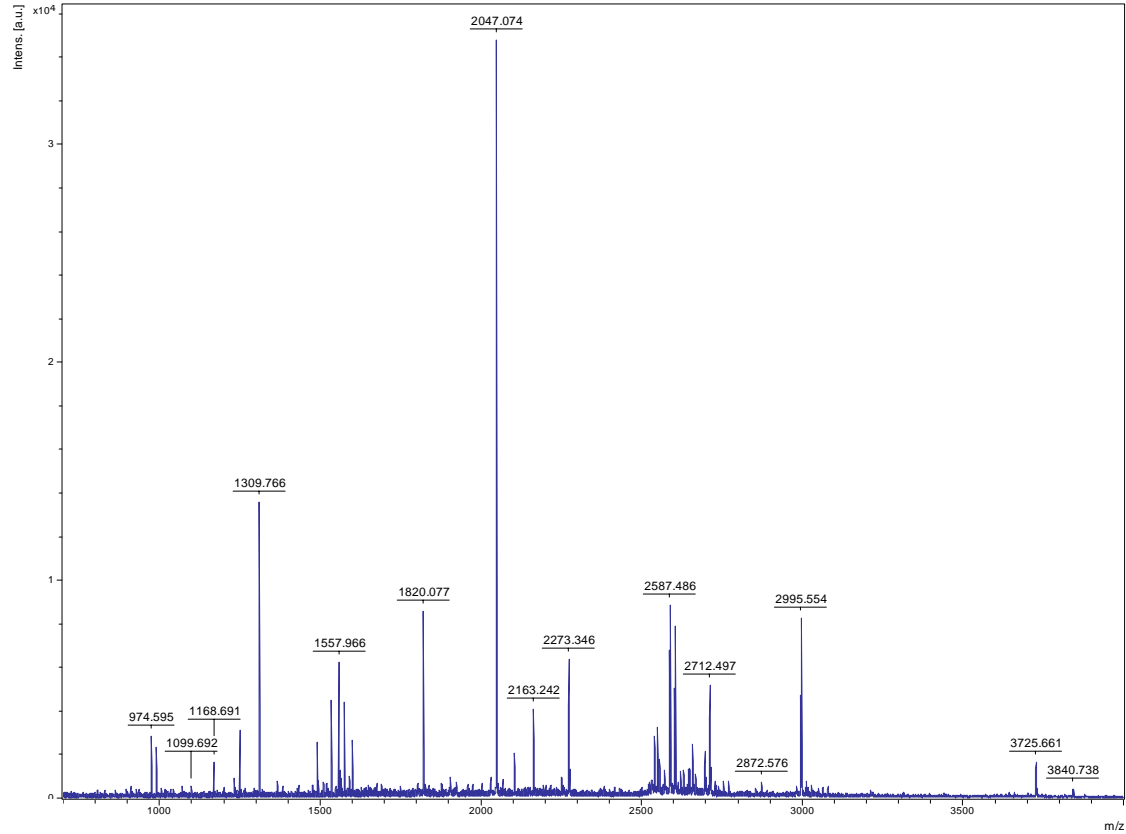

Match to: gi|50940199 Score: 86

### Matched peptides:

| Start - End | Observed  | Mr (expt) | Mr (calc) | Delta  | Miss Sequence                                 |
|-------------|-----------|-----------|-----------|--------|-----------------------------------------------|
| 5 - 19      | 1599.9307 | 1598.9234 | 1598.7827 | 0.1406 | 0 K.SYPTVSDEYLAAVGK.A                         |
| 32 - 39     | 974.5952  | 973.5879  | 973.4837  | 0.1042 | 0 K.NCAPMLRL.L Carbamidomethyl (C)            |
| 40 - 53     | 1533.8700 | 1532.8627 | 1532.7372 | 0.1256 | 0 R.LAWHSAGTFDVSSR.T                          |
| 54 - 62     | 911.5243  | 910.5170  | 910.4218  | 0.0952 | 0 R.TGGPFPTMK.N Oxidation (M)                 |
| 63 - 80     | 1820.0775 | 1819.0702 | 1818.8972 | 0.1730 | 0 K.NPGEQSHAANAGLDIAVRL.L                     |
| 132 - 143   | 1309.7659 | 1308.7586 | 1308.6422 | 0.1164 | 0 R.LPDATEQGSDDLRL.Q                          |
| 144 - 168   | 2587.4866 | 2586.4793 | 2586.3223 | 0.1570 | 1 R.QVFSAQMGLSDKDIVALSGGGTLGR.C               |
| 144 - 168   | 2603.4866 | 2602.4793 | 2602.3172 | 0.1621 | 1 R.QVFSAQMGLSDKDIVALSGGGTLGR.C Oxidation (M) |
| 174 - 200   | 2995.5540 | 2994.5467 | 2994.3922 | 0.1545 | 0 R.SGFEGAWTSNPLIFDINSYFTELVSGEK.E            |
| 201 - 210   | 1099.6918 | 1098.6845 | 1098.5921 | 0.0924 | 0 K.EGLQLPSDK.A                               |
| 211 - 224   | 1557.9661 | 1556.9588 | 1556.8384 | 0.1204 | 0 K.ALMAADPAFRPLVEK.Y                         |
| 225 - 242   | 2047.0745 | 2046.0672 | 2045.9006 | 0.1666 | 0 K.YAADEDAFFADYAEHLK.L                       |

## Spot 2215

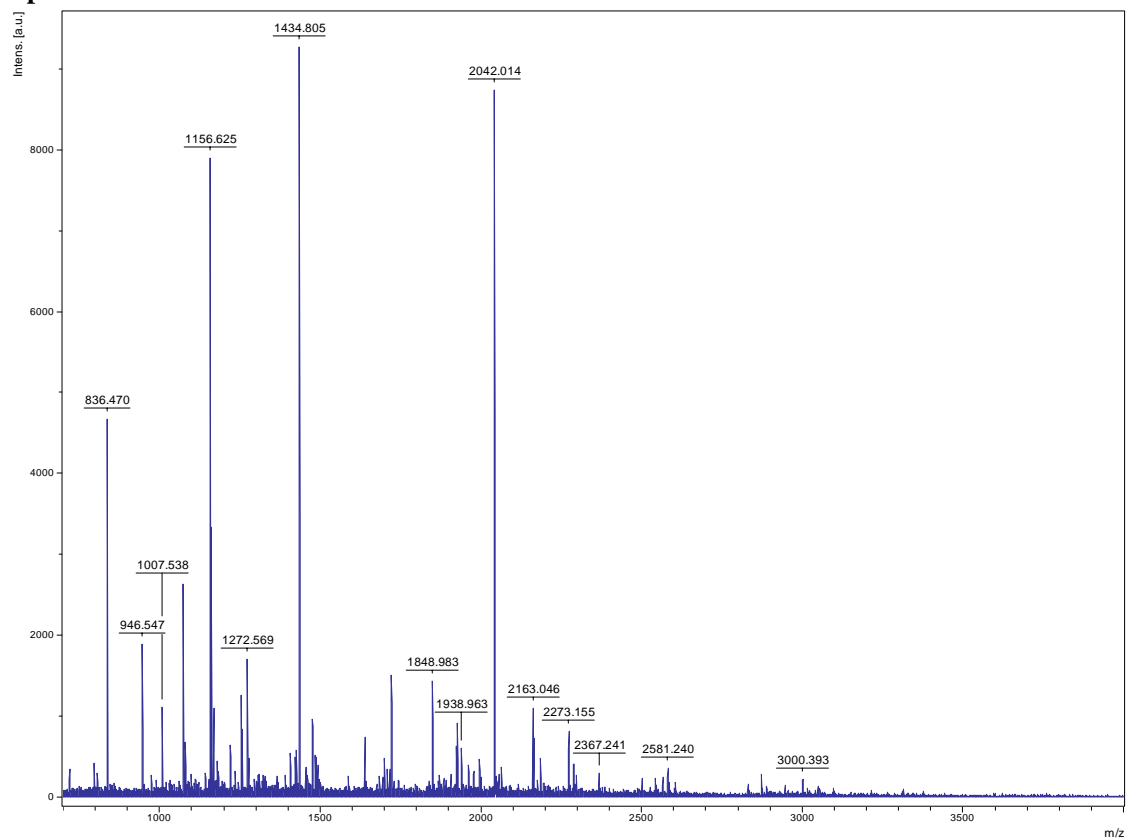

Match to: gi|12229922; Score: 192

### Matched peptides:

| Start - End | Observed | Mr (expt) | Mr (calc) | Delta | Miss Sequence                               |
|-------------|----------|-----------|-----------|-------|---------------------------------------------|
| 12 - 21     | 1156.62  | 1155.62   | 1155.60   | 0.02  | 0 HITIFSPEGR                                |
| 22 - 30     | 1160.61  | 1159.61   | 1159.59   | 0.02  | 0 LYQVEYAFK                                 |
| 34 - 43     | 946.55   | 945.54    | 945.52    | 0.02  | 0 SAGVTSIGVR                                |
| 44 - 54     | 1220.63  | 1219.63   | 1219.62   | 0.00  | 1 GKDSVCVVTQK                               |
| 60 - 74     | 1721.97  | 1720.96   | 1720.95   | 0.01  | 0 LLDHTSVTHLFPITK                           |
| 75 - 88     | 1434.81  | 1433.80   | 1433.79   | 0.02  | 0 YIGLLATGLTADAR                            |
| 89 - 95     | 836.47   | 835.47    | 835.46    | 0.01  | 0 SLVYQAR                                   |
| 103 - 116   | 1698.87  | 1697.87   | 1697.85   | 0.02  | 1 FKWGYEMPVDVLAK Oxidation (M)              |
| 105 - 116   | 1407.71  | 1406.71   | 1406.69   | 0.02  | 0 WGYEMPVDVLAK                              |
| 105 - 116   | 1423.71  | 1422.71   | 1422.69   | 0.02  | 0 WGYEMPVDVLAK Oxidation (M)                |
| 122 - 147   | 3000.39  | 2999.39   | 2999.45   | -0.06 | 0 AQVYTDHAYMRPLGVMVLYGYDEEK 2 Oxidation (M) |
| 154 - 164   | 1272.57  | 1271.57   | 1271.55   | 0.02  | 0 CDPAGHFFGHK                               |
| 165 - 181   | 1848.98  | 1847.98   | 1847.96   | 0.02  | 1 ATSAGLKEQEAINFLEK                         |
| 212 - 221   | 1072.62  | 1071.61   | 1071.59   | 0.02  | 0 ATEIEVGVVR                                |
| 229 - 245   | 1926.98  | 1925.98   | 1925.97   | 0.01  | 0 ALTTEEIDQHLTAISER                         |
| 229 - 246   | 2042.01  | 2041.01   | 2041.00   | 0.02  | 1 ALTTEEIDQHLTAISERD                        |

## Spot 2217

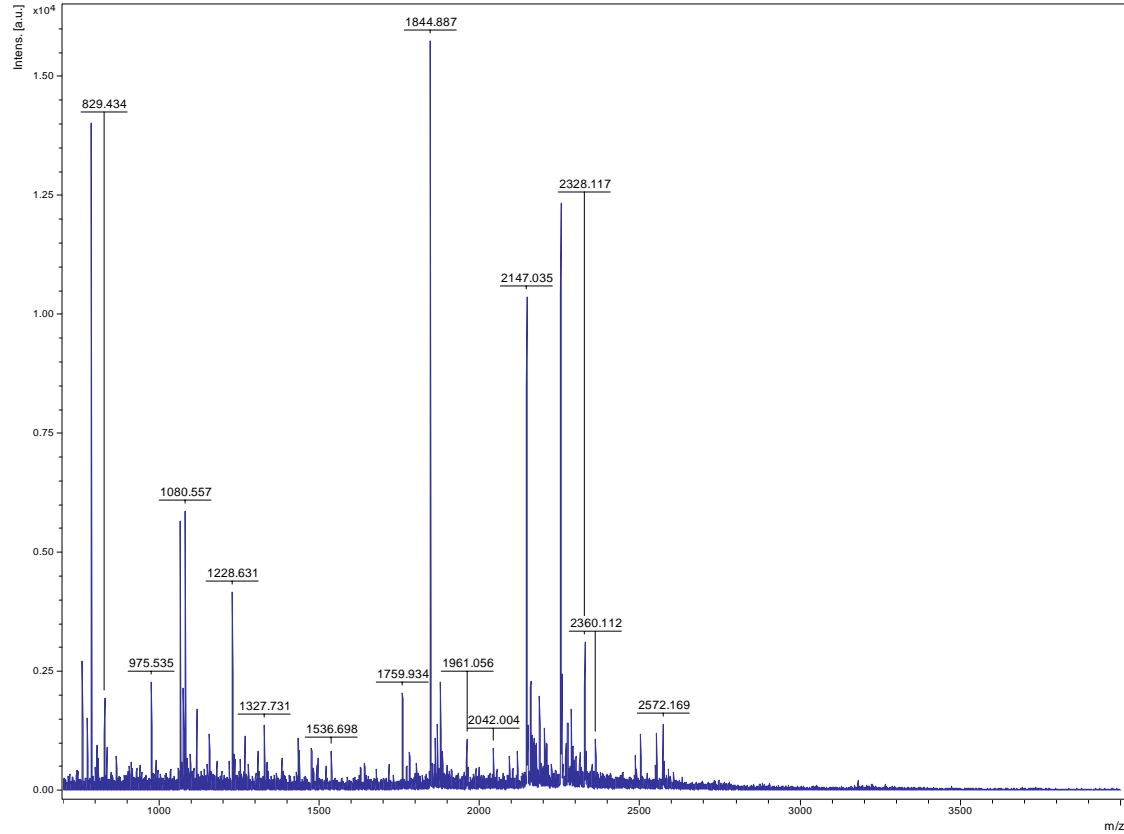

Match to: gj|1296955; Score: 153

### Matched peptides:

| Start - End | Observed | Mr (expt) | Mr (calc) | Delta | Miss Sequence               |
|-------------|----------|-----------|-----------|-------|-----------------------------|
| 106 - 128   | 2550.21  | 2549.20   | 2549.20   | 0.01  | 0 LAPFNPEYPDESVLWTESGDVGK   |
| 169 - 175   | 907.41   | 906.40    | 906.37    | 0.04  | 0 GDNQCWK                   |
| 176 - 193   | 1844.89  | 1843.89   | 1843.89   | -0.00 | 0 ILPWGDEAYAGGSANAPR        |
| 194 - 201   | 829.43   | 828.43    | 828.41    | 0.02  | 0 GGNEPTVR                  |
| 202 - 215   | 1628.84  | 1627.83   | 1627.80   | 0.03  | 1 IFCKADEGFSVTVR            |
| 206 - 215   | 1080.56  | 1079.56   | 1079.52   | 0.03  | 0 ADEGFSVTVR                |
| 216 - 227   | 1228.63  | 1227.63   | 1227.60   | 0.03  | 0 GGSVCLAPTNP               |
| 216 - 235   | 2328.12  | 2327.12   | 2327.11   | 0.00  | 1 GGSVCLAPTNP RDEYQHWIK     |
| 228 - 235   | 1118.53  | 1117.53   | 1117.52   | 0.01  | 0 DEYQHWIK                  |
| 228 - 238   | 1520.71  | 1519.70   | 1519.69   | 0.02  | 1 DEYQHWIKDMR               |
| 228 - 238   | 1536.70  | 1535.70   | 1535.68   | 0.01  | 1 DEYQHWIKDMR Oxidation (M) |
| 236 - 244   | 1087.54  | 1086.54   | 1086.52   | 0.02  | 1 DMRHSNIK                  |
| 239 - 257   | 2147.04  | 2146.03   | 2146.04   | -0.01 | 1 HNSIKDEEGYPAFALVNR        |
| 245 - 257   | 1480.73  | 1479.73   | 1479.70   | 0.03  | 0 DEEGYPAFALVNR             |
| 265 - 274   | 1075.54  | 1074.54   | 1074.52   | 0.02  | 0 HSQEGHPVK                 |
| 326 - 334   | 990.55   | 989.55    | 989.52    | 0.03  | 0 DGTVALWK                  |
| 335 - 342   | 1064.44  | 1063.44   | 1063.41   | 0.02  | 0 WCEGDNR                   |



## Spot 2222

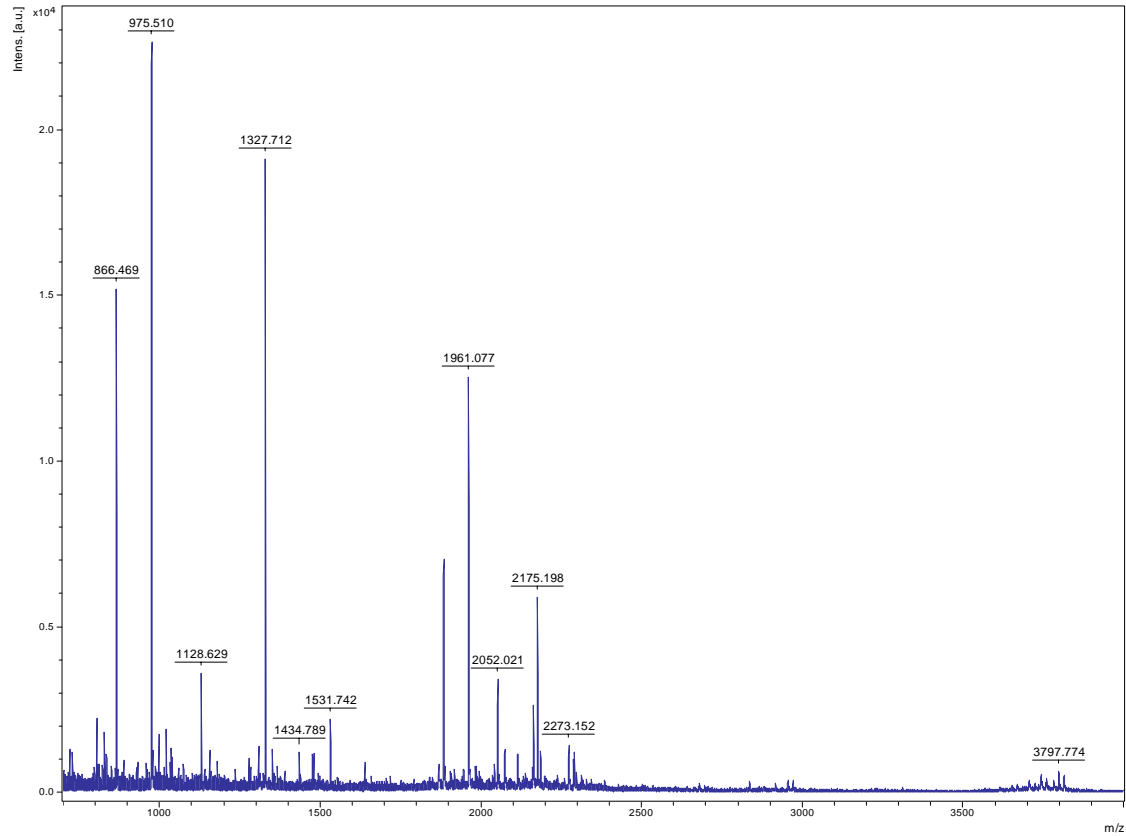

Match to: gi|46275847; Score: 72

### Matched peptides:

| Start - End | Observed | Mr (expt) | Mr (calc) | Delta | Miss Sequence           |
|-------------|----------|-----------|-----------|-------|-------------------------|
| 21 - 27     | 820.49   | 819.49    | 819.42    | 0.07  | 0 NAMEVEK Oxidation (M) |
| 58 - 71     | 1531.74  | 1530.74   | 1530.73   | 0.01  | 1 ATEGPVADKNCCK         |
| 182 - 198   | 1884.04  | 1883.04   | 1883.01   | 0.02  | 1 EGLTREEGIQLVAEAIR     |
| 187 - 198   | 1327.71  | 1326.71   | 1326.71   | -0.00 | 0 EEGIQLVAEAIR          |
| 199 - 218   | 2052.02  | 2051.02   | 2051.00   | 0.02  | 0 GGIFNDLGSGSNVDVCVITK  |
| 219 - 225   | 866.47   | 865.47    | 865.47    | 0.00  | 1 GKTEYLR               |
| 226 - 233   | 975.51   | 974.51    | 974.50    | 0.00  | 0 NHQLPNPR              |
| 255 - 261   | 827.54   | 826.54    | 826.53    | 0.01  | 0 ITQLKPK               |

## Spot 2234

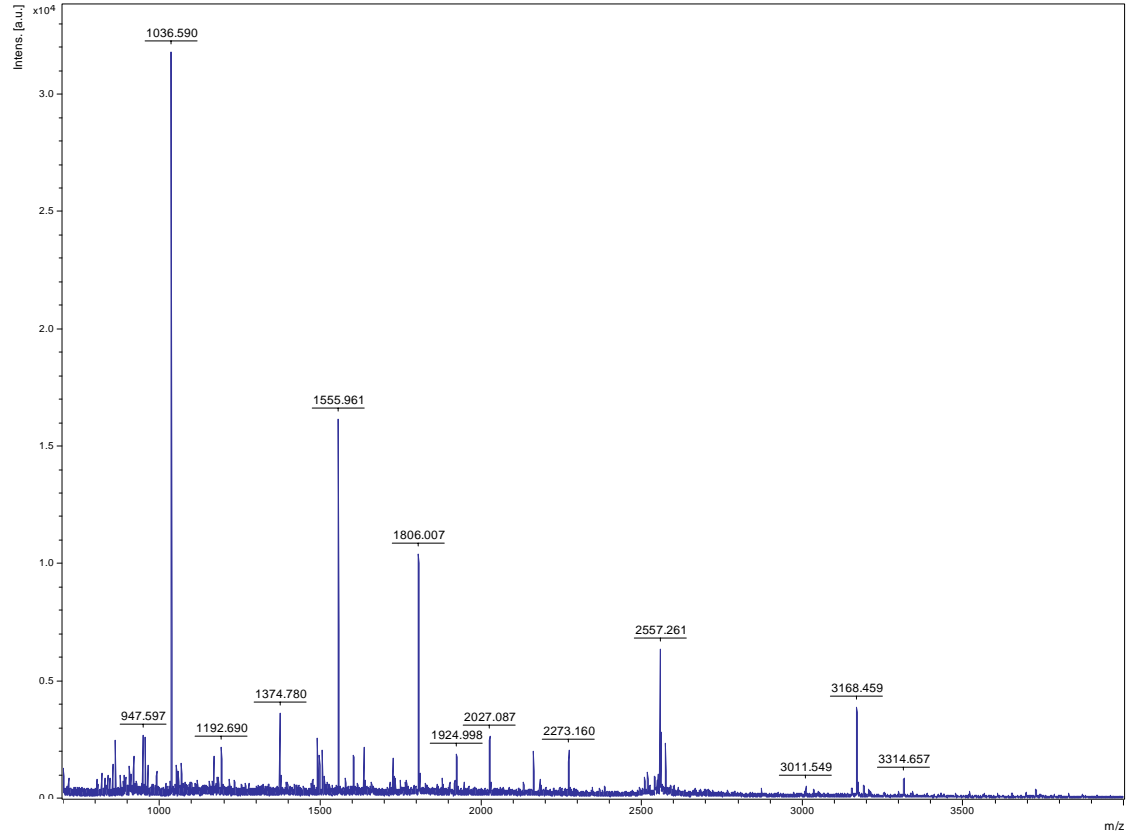

Match to: gi|50920595 Score: 81 Expect: 0.00056

### Matched peptides:

| Start - End | Observed  | Mr (expt) | Mr (calc) | Delta   | Miss Sequence                                 |
|-------------|-----------|-----------|-----------|---------|-----------------------------------------------|
| 2 - 18      | 1924.9723 | 1923.9650 | 1923.9577 | 0.0073  | 1 M.AKNYPVVS AEYQEA VEK.A                     |
| 4 - 18      | 1725.8813 | 1724.8740 | 1724.8257 | 0.0484  | 0 K.NYPVVS AEYQEA VEK.A                       |
| 31 - 38     | 947.4759  | 946.4686  | 946.4728  | -0.0042 | 0 K.SCAPLMRL.L Carbamidomethyl (C)            |
| 39 - 52     | 1505.7820 | 1504.7747 | 1504.7310 | 0.0437  | 0 R.LAWHSAGTFDVS SK.T                         |
| 62 - 79     | 1805.9912 | 1804.9839 | 1804.9431 | 0.0408  | 0 K.TPAELSHAANAGLDIAVR.M                      |
| 120 - 130   | 1192.6266 | 1191.6193 | 1191.5884 | 0.0310  | 0 R.EDKPAPPEGR.L                              |
| 143 - 167   | 2557.2538 | 2556.2465 | 2556.2754 | -0.0289 | 0 R.QVFGAQMGLSDQDIVALSGGHTLGR.C               |
| 143 - 167   | 2573.2409 | 2572.2336 | 2572.2703 | -0.0367 | 0 R.QVFGAQMGLSDQDIVALSGGHTLGR.C Oxidation (M) |
| 182 - 209   | 3168.4856 | 3167.4783 | 3167.5662 | -0.0879 | 1 R.NPLQFDNSYFTLLSGDK ELLQLPSDK.A             |
| 210 - 223   | 1555.9303 | 1554.9230 | 1554.8769 | 0.0461  | 0 K.ALLSDPAFRPLVEK.Y                          |
| 230 - 236   | 919.4170  | 918.4097  | 918.4123  | -0.0026 | 0 K.AFFEDYK.E                                 |
| 230 - 241   | 1497.7750 | 1496.7677 | 1496.7299 | 0.0378  | 1 K.AFFEDYK EAH LK.L                          |

Spot 2237

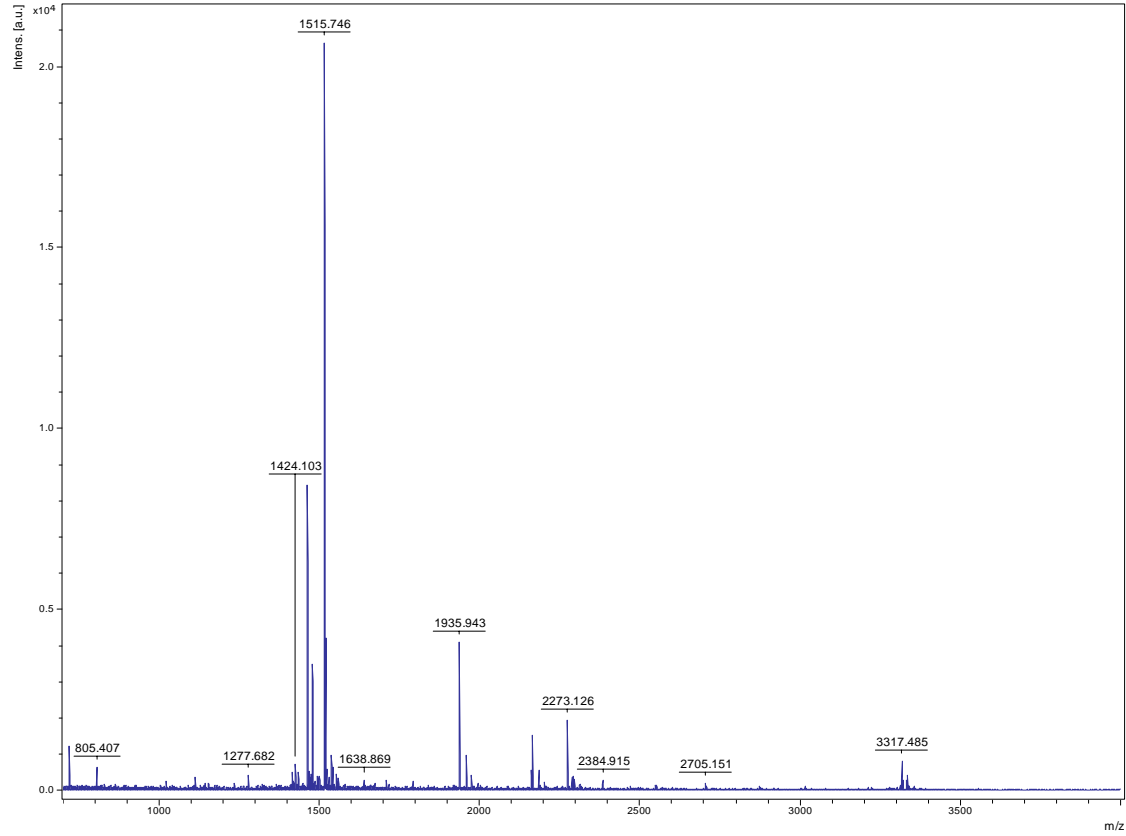

Match to: gi|46575976 Score: 68

Matched peptides:

| Start - End | Observed  | Mr (expt) | Mr (calc) | Delta   | Miss Sequence                                        |
|-------------|-----------|-----------|-----------|---------|------------------------------------------------------|
| 17 - 29     | 1519.8730 | 1518.8658 | 1518.8809 | -0.0152 | 0 K.NILFVISKPDVFK.S                                  |
| 30 - 43     | 1514.7104 | 1513.7032 | 1513.7300 | -0.0268 | 0 K.SPTSDTYVIFGEAK.I                                 |
| 44 - 60     | 1935.9425 | 1934.9352 | 1934.9585 | -0.0233 | 0 K.IEDLSSQLQTQAAEQFK.A                              |
| 61 - 92     | 3317.4849 | 3316.4776 | 3316.5140 | -0.0364 | 0 K.APDLSSMLSKPEASTAAQEDDEAVDETGVEPK.D               |
| 61 - 92     | 3333.4817 | 3332.4744 | 3332.5089 | -0.0345 | 0 K.APDLSSMLSKPEASTAAQEDDEAVDETGVEPK.D Oxidation (M) |
| 93 - 105    | 1462.7407 | 1461.7334 | 1461.7497 | -0.0162 | 0 K.DIELVMTQATVSR.S                                  |
| 93 - 105    | 1478.7288 | 1477.7215 | 1477.7446 | -0.0231 | 0 K.DIELVMTQATVSR.S Oxidation (M)                    |

### Spot 2239

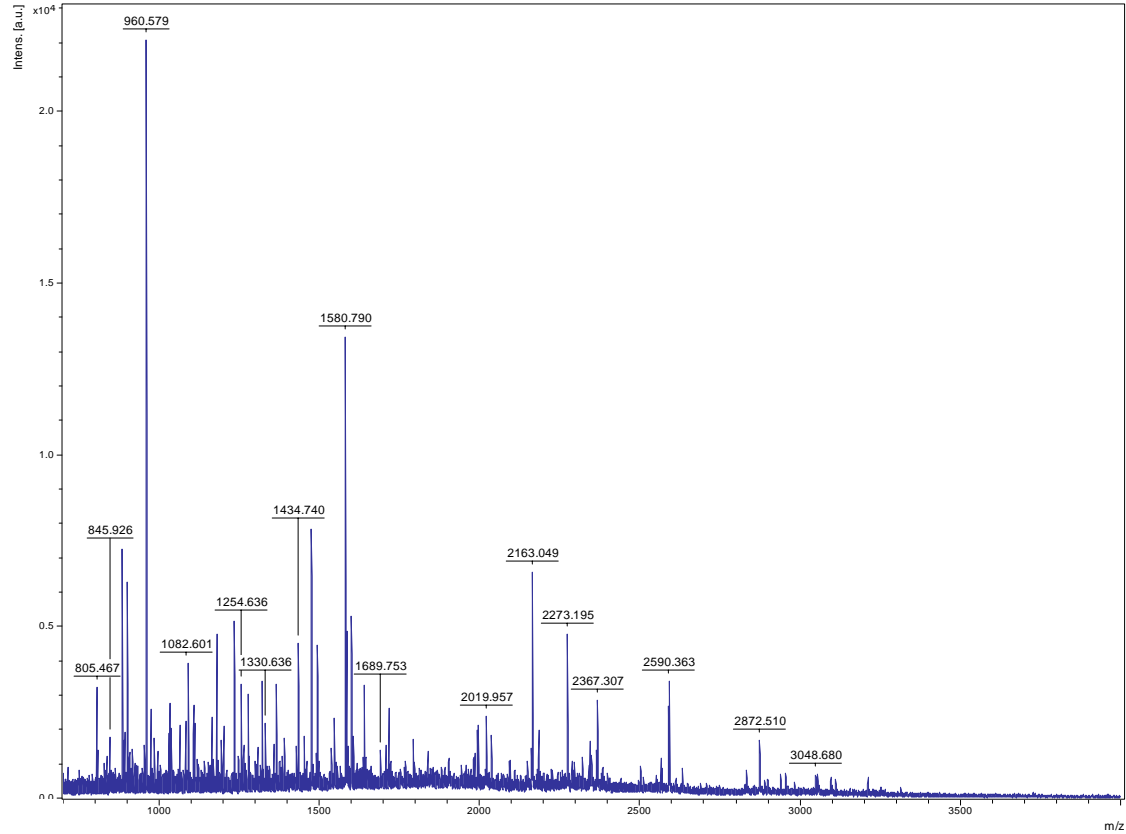

Match to: gi|34913460 Score: 72 Expect: 0.0047

#### Matched peptides:

| Start - End | Observed  | Mr (expt) | Mr (calc) | Delta   | Miss Sequence                                                        |
|-------------|-----------|-----------|-----------|---------|----------------------------------------------------------------------|
| 54 - 65     | 1330.6360 | 1329.6287 | 1329.6088 | 0.0199  | 0 R.DDTTFDAYVVGK.E                                                   |
| 66 - 85     | 2345.2009 | 2344.1937 | 2344.1739 | 0.0198  | 0 K.ENAPGIVVLQEWVWGVVDEIK.N                                          |
| 86 - 99     | 1580.7902 | 1579.7829 | 1579.7855 | -0.0026 | 0 K.NHAVHISQIGEGYR.A                                                 |
| 100 - 107   | 960.5787  | 959.5714  | 959.5440  | 0.0274  | 0 R.ALIPDLR.G                                                        |
| 110 - 131   | 2365.2397 | 2364.2325 | 2364.1783 | 0.0542  | 0 K.VALDVAEAQHLMEGLDWPVAVK.D Oxidation (M)                           |
| 190 - 214   | 2590.3625 | 2589.3553 | 2589.2863 | 0.0690  | 0 K.AQAPIQAHFGELDSFVGFADVTAAK.S                                      |
| 222 - 248   | 2954.4729 | 2953.4656 | 2953.3486 | 0.1170  | 0 K.SSGVPHEVHIYPGCSHAFMNTSPEAVK.R Carbamidomethyl (C); Oxidation (M) |
| 252 - 269   | 2019.9570 | 2018.9498 | 2018.9367 | 0.0130  | 0 K.EMGLTDENQAAIDLAWSR.F                                             |
| 252 - 269   | 2035.9434 | 2034.9361 | 2034.9316 | 0.0045  | 0 K.EMGLTDENQAAIDLAWSR.F Oxidation (M)                               |
| 270 - 276   | 884.4525  | 883.4452  | 883.4010  | 0.0442  | 0 R.FSTWMGR.F                                                        |
| 270 - 276   | 900.4548  | 899.4475  | 899.3959  | 0.0515  | 0 R.FSTWMGR.F Oxidation (M)                                          |

### Spot 2240

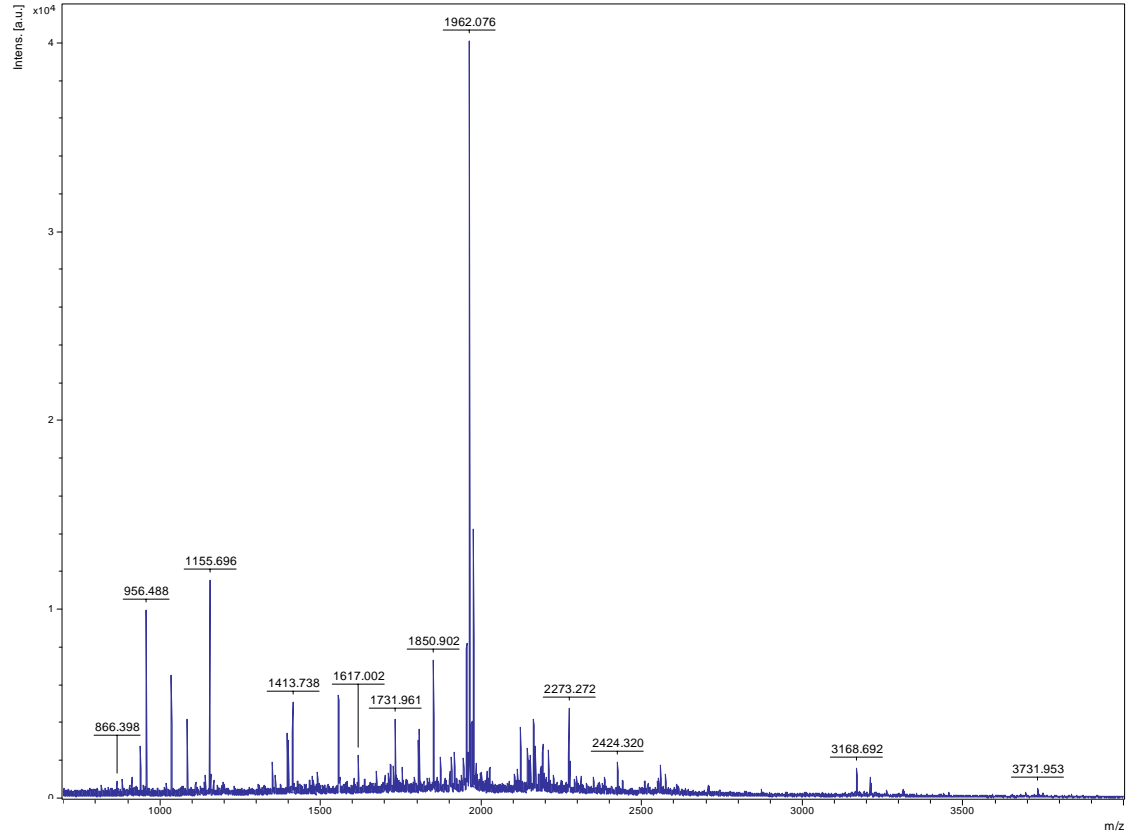

Match to: gi|51979316 Score: 78 Expect: 0.0011

#### Matched peptides:

| Start - End | Observed  | Mr (expt) | Mr (calc) | Delta   | Miss Sequence                           |
|-------------|-----------|-----------|-----------|---------|-----------------------------------------|
| 2 - 18      | 1850.7952 | 1849.7879 | 1849.8370 | -0.0491 | 0 M.GDSQYFSFLTTFSPSGK.L Acetyl (N-term) |
| 19 - 39     | 2122.1792 | 2121.1719 | 2121.1793 | -0.0074 | 0 K.LVQIEHALTAVGSGQTSLGIK.A             |
| 52 - 64     | 1428.7554 | 1427.7481 | 1427.7871 | -0.0390 | 0 K.LPSILVDETSVQK.I                     |
| 92 - 99     | 1084.4329 | 1083.4256 | 1083.5461 | -0.1205 | 1 R.KQAQQYYR.L                          |
| 93 - 99     | 939.3026  | 938.2953  | 938.4246  | -0.1293 | 0 K.QAQQYYR.L Pyro-glu (N-term Q)       |
| 93 - 99     | 956.3248  | 955.3175  | 955.4512  | -0.1336 | 0 K.QAQQYYR.L                           |
| 103 - 112   | 1155.5765 | 1154.5692 | 1154.6659 | -0.0967 | 0 K.ETIPVTQLVR.E                        |
| 177 - 196   | 2348.1846 | 2347.1773 | 2347.1729 | 0.0044  | 1 K.RYTEDMELDDAIHTAILTLK.E              |
| 178 - 196   | 2192.0749 | 2191.0676 | 2191.0718 | -0.0042 | 0 R.YTEDMELDDAIHTAILTLK.E               |
| 197 - 214   | 1961.9739 | 1960.9666 | 1960.9853 | -0.0187 | 0 K.EGYEQISANNIEIGVIR.S                 |
| 221 - 235   | 1731.8600 | 1730.8527 | 1730.8978 | -0.0450 | 1 K.VLTPAEIKDFLEEVE.-                   |

## Spot 2245

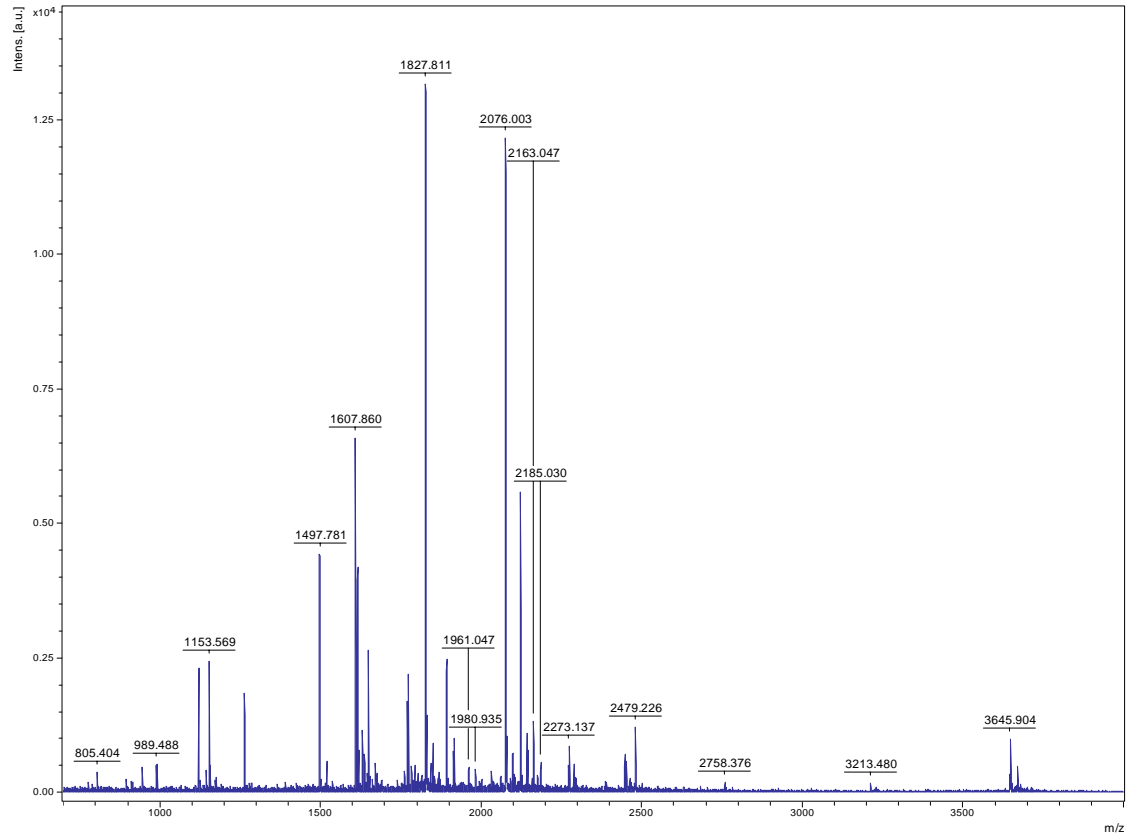

Match to: gi|28192425; Score: 170

### Matched peptides:

| Start - End | Observed | Mr (expt) | Mr (calc) | Delta | Miss Sequence                       |
|-------------|----------|-----------|-----------|-------|-------------------------------------|
| 9 - 25      | 1827.81  | 1826.81   | 1826.84   | -0.03 | 0 AAVGHPTLDGCPFSQR                  |
| 26 - 33     | 944.56   | 943.55    | 943.56    | -0.00 | 0 VLLTLEEK                          |
| 34 - 40     | 894.45   | 893.45    | 893.47    | -0.02 | 1 KVPYEMK                           |
| 41 - 53     | 1615.84  | 1614.84   | 1614.88   | -0.04 | 0 LIDVQNKPDWFLK                     |
| 60 - 69     | 989.49   | 988.49    | 988.50    | -0.01 | 0 VPVFNQGDGK                        |
| 70 - 84     | 1771.86  | 1770.86   | 1770.90   | -0.04 | 0 WIPDSDVITQVIEEK                   |
| 70 - 102    | 3645.90  | 3644.90   | 3644.85   | -0.05 | 1 WIPDSDVITQVIEEKYPTPSLVTPPEYASVGSK |
| 85 - 102    | 1892.94  | 1891.93   | 1891.96   | -0.02 | 0 YTPPSLVTPPEYASVGSK                |
| 123 - 136   | 1607.86  | 1606.86   | 1606.89   | -0.04 | 0 ALLTELQALEEHLK                    |
| 158 - 169   | 1497.78  | 1496.78   | 1496.81   | -0.04 | 0 LYHLQVALEHFK                      |
| 170 - 190   | 2447.23  | 2446.23   | 2446.23   | 0.00  | 1 GWKIPEDLTNVHAYTEALFSR             |
| 173 - 190   | 2076.00  | 2075.00   | 2075.03   | -0.03 | 0 IPEDLTNVHAYTEALFSR                |
| 201 - 210   | 1121.58  | 1120.58   | 1120.60   | -0.02 | 0 EHLAGWAPK                         |

## Spot 2246

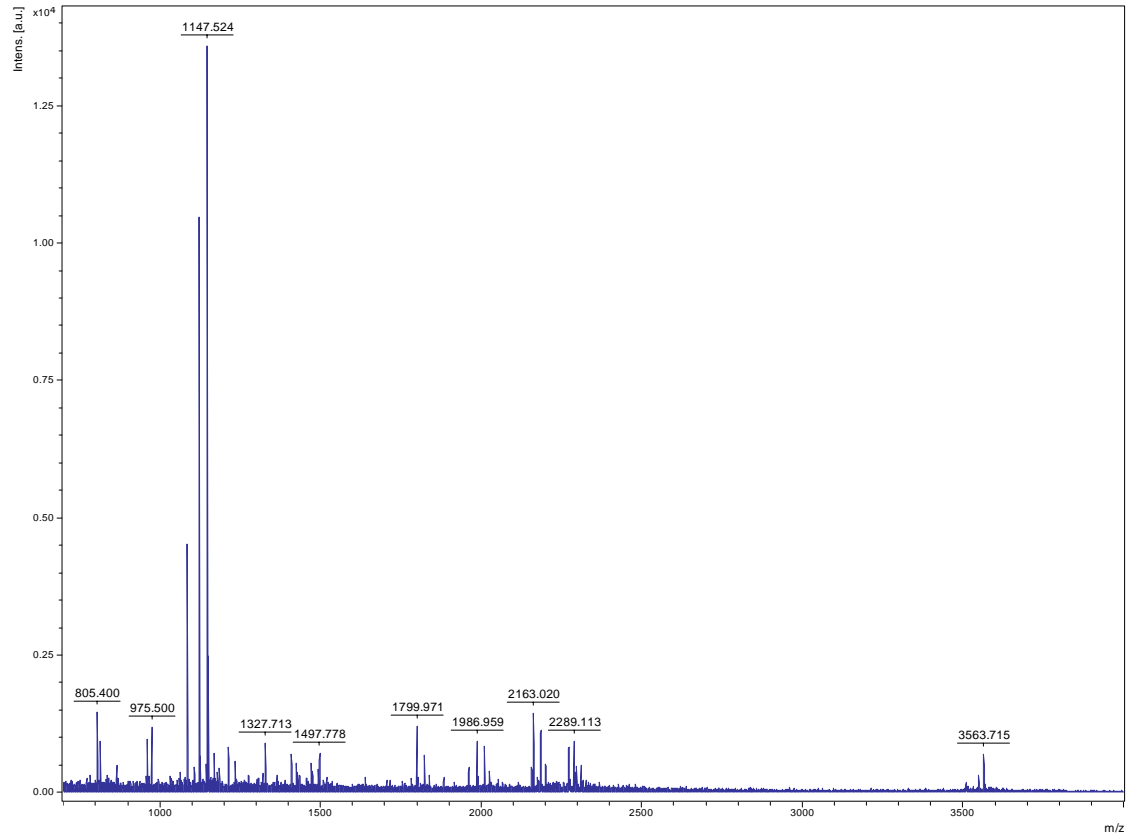

Match to: gi|77556961; Score: 89

### Matched peptides:

| Start - End | Observed | Mr (expt) | Mr (calc) | Delta | Miss Sequence             |
|-------------|----------|-----------|-----------|-------|---------------------------|
| 104 - 112   | 1121.56  | 1120.56   | 1120.58   | -0.02 | 0 DTIELFVER               |
| 117 - 127   | 1085.61  | 1084.60   | 1084.62   | -0.02 | 0 GITVIAGVEAR             |
| 128 - 142   | 1471.83  | 1470.83   | 1470.86   | -0.03 | 0 GFIFGPPIALALGAK         |
| 151 - 169   | 2157.02  | 2156.02   | 2156.05   | -0.03 | 1 KLPGEVISEEYSLEYGTDK     |
| 183 - 201   | 1799.97  | 1798.97   | 1799.00   | -0.04 | 0 AVVVDDLIATGGTLSAAVK     |
| 183 - 205   | 2311.09  | 2310.09   | 2310.32   | -0.22 | 1 AVVVDDLIATGGTLSAAVKLIER |
| 206 - 223   | 1986.96  | 1985.96   | 1985.98   | -0.02 | 0 AGAEVVECACVIELPELK      |
| 228 - 238   | 1213.72  | 1212.71   | 1212.76   | -0.05 | 0 LGNKPVFVLVK             |

## Spot 2248

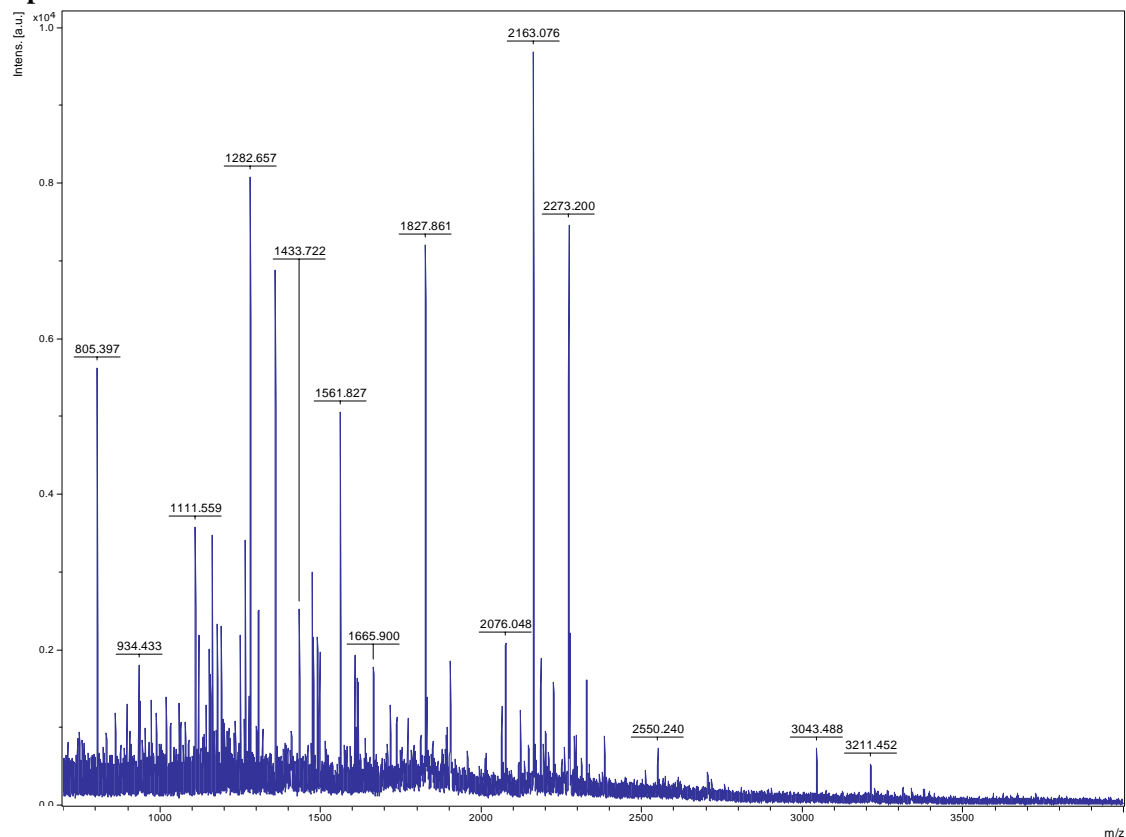

Match to: gi|55168334 Score: 86 Expect: 0.00018

### Matched peptides:

| Start - End | Observed  | Mr (expt) | Mr (calc) | Delta   | Miss Sequence                                     |
|-------------|-----------|-----------|-----------|---------|---------------------------------------------------|
| 1 - 8       | 937.4038  | 936.3965  | 936.4408  | -0.0443 | 0 -.MGVEVCVK.A Carbamidomethyl (C); Oxidation (M) |
| 9 - 25      | 1827.8698 | 1826.8625 | 1826.8369 | 0.0256  | 0 K.AAVGHPDPLGDCPFQSR.V Carbamidomethyl (C)       |
| 41 - 53     | 1615.9221 | 1614.9148 | 1614.8769 | 0.0379  | 0 K.LIDVQNKPDWFLK.I                               |
| 70 - 84     | 1771.9406 | 1770.9333 | 1770.9039 | 0.0294  | 0 K.WIPDSVITQVIEEK.Y                              |
| 85 - 102    | 1892.9678 | 1891.9605 | 1891.9567 | 0.0038  | 0 K.YPTPSLVTPPEYASVGSK.I                          |
| 103 - 112   | 1263.6611 | 1262.6538 | 1262.6369 | 0.0169  | 0 K.IFSCPTFLK.S Carbamidomethyl (C)               |
| 123 - 136   | 1607.9173 | 1606.9100 | 1606.8930 | 0.0170  | 0 K.ALLTELQALEEHLK.A                              |
| 137 - 157   | 2121.1039 | 2120.0966 | 2120.1014 | -0.0048 | 0 K.AHGPFINGQNISAADLSLAPK.L                       |
| 158 - 169   | 1497.8537 | 1496.8464 | 1496.8139 | 0.0325  | 0 K.LYHLQVALEHFK.G                                |
| 173 - 190   | 2076.0375 | 2075.0302 | 2075.0323 | -0.0021 | 0 K.IPEDLTNVHAYTEALFSR.E                          |

Match to: gi|50939487 Score: 82 Expect: 0.00038

### Matched peptides:

| Start - End | Observed  | Mr (expt) | Mr (calc) | Delta   | Miss Sequence                              |
|-------------|-----------|-----------|-----------|---------|--------------------------------------------|
| 67 - 79     | 1471.7604 | 1470.7531 | 1470.7137 | 0.0395  | 0 K.LLGISCDVQSHK.D Carbamidomethyl (C)     |
| 67 - 83     | 2013.9906 | 2012.9833 | 2012.9989 | -0.0156 | 1 K.LLGISCDVQSHKDVIK.D Carbamidomethyl (C) |
| 84 - 93     | 1162.5906 | 1161.5833 | 1161.5778 | 0.0055  | 0 K.DIEAYKPGNR.V                           |
| 94 - 104    | 1249.6232 | 1248.6159 | 1248.6172 | -0.0013 | 0 R.VTYPIMADPSR.E                          |
| 141 - 151   | 1282.6641 | 1281.6568 | 1281.6539 | 0.0029  | 0 K.LSFLYPACVGR.N Carbamidomethyl (C)      |
| 152 - 158   | 862.3514  | 861.3441  | 861.4014  | -0.0573 | 0 R.NMDEVV.R.A                             |
| 159 - 168   | 987.4697  | 986.4624  | 986.5396  | -0.0772 | 0 R.AVDALQTAAK.H                           |
| 169 - 182   | 1561.8504 | 1560.8431 | 1560.8161 | 0.0271  | 0 K.HAVATPVNWKPER.V                        |
| 196 - 211   | 1736.9080 | 1735.9007 | 1735.8417 | 0.0591  | 1 K.EKFPQGFDTADLPSGK.G                     |
| 198 - 211   | 1479.7486 | 1478.7413 | 1478.7041 | 0.0372  | 0 K.FPQGFDTADLPSGK.G                       |



## Spot 2251

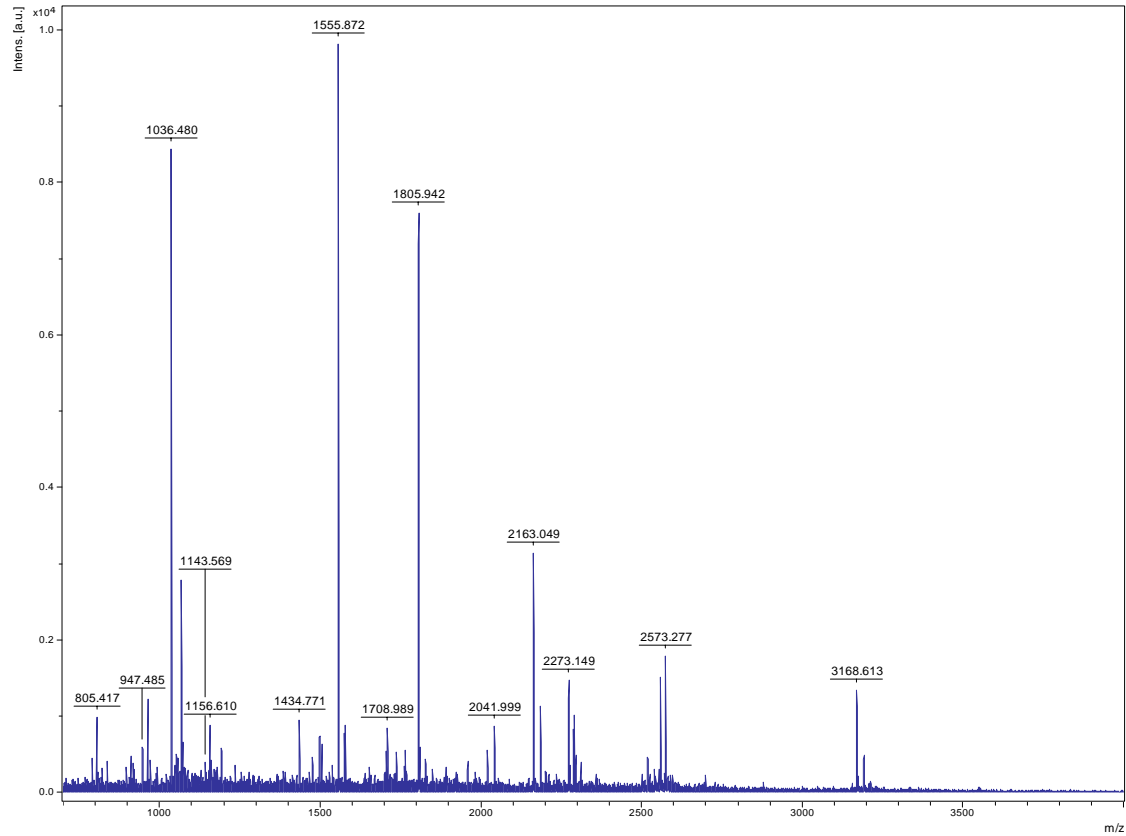

Match to: gi|75220444; Score: 122

### Matched peptides:

| Start - End | Observed | Mr (expt) | Mr (calc) | Delta | Miss Sequence                             |
|-------------|----------|-----------|-----------|-------|-------------------------------------------|
| 31 - 38     | 947.48   | 946.48    | 946.47    | 0.01  | 0 SCAPLMLR                                |
| 31 - 38     | 963.47   | 962.47    | 962.47    | 0.00  | 0 SCAPLMLR Oxidation (M)                  |
| 39 - 52     | 1505.73  | 1504.73   | 1504.73   | -0.00 | 0 LAWHSAGTFDVSSK                          |
| 53 - 61     | 895.45   | 894.45    | 894.43    | 0.02  | 0 TGGPFGTMK                               |
| 53 - 61     | 911.43   | 910.42    | 910.42    | 0.00  | 0 TGGPFGTMK Oxidation (M)                 |
| 62 - 79     | 1805.94  | 1804.94   | 1804.94   | -0.00 | 0 TPAELSHAANAGLDIAVR                      |
| 120 - 130   | 1192.59  | 1191.59   | 1191.59   | 0.00  | 0 EDKPAPPPEGR                             |
| 143 - 167   | 2557.27  | 2556.26   | 2556.28   | -0.01 | 0 QVFGAQMGLSDQDIVALSGGHTLGR               |
| 143 - 167   | 2573.28  | 2572.27   | 2572.27   | 0.00  | 0 QVFGAQMGLSDQDIVALSGGHTLGR Oxidation (M) |
| 173 - 181   | 1036.48  | 1035.48   | 1035.48   | 0.00  | 0 SGFEGPWTR                               |
| 182 - 209   | 3168.61  | 3167.61   | 3167.57   | 0.04  | 1 NPLQFDNSYFTELLSGDKEGLLQLPSDK            |
| 210 - 223   | 1555.87  | 1554.87   | 1554.88   | -0.01 | 0 ALLSDPAFRPLVEK                          |
| 230 - 236   | 919.41   | 918.41    | 918.41    | -0.00 | 0 AFFEDYK                                 |
| 230 - 241   | 1497.73  | 1496.73   | 1496.73   | -0.00 | 1 AFFEDYKEAHLK                            |

## Spot 2254

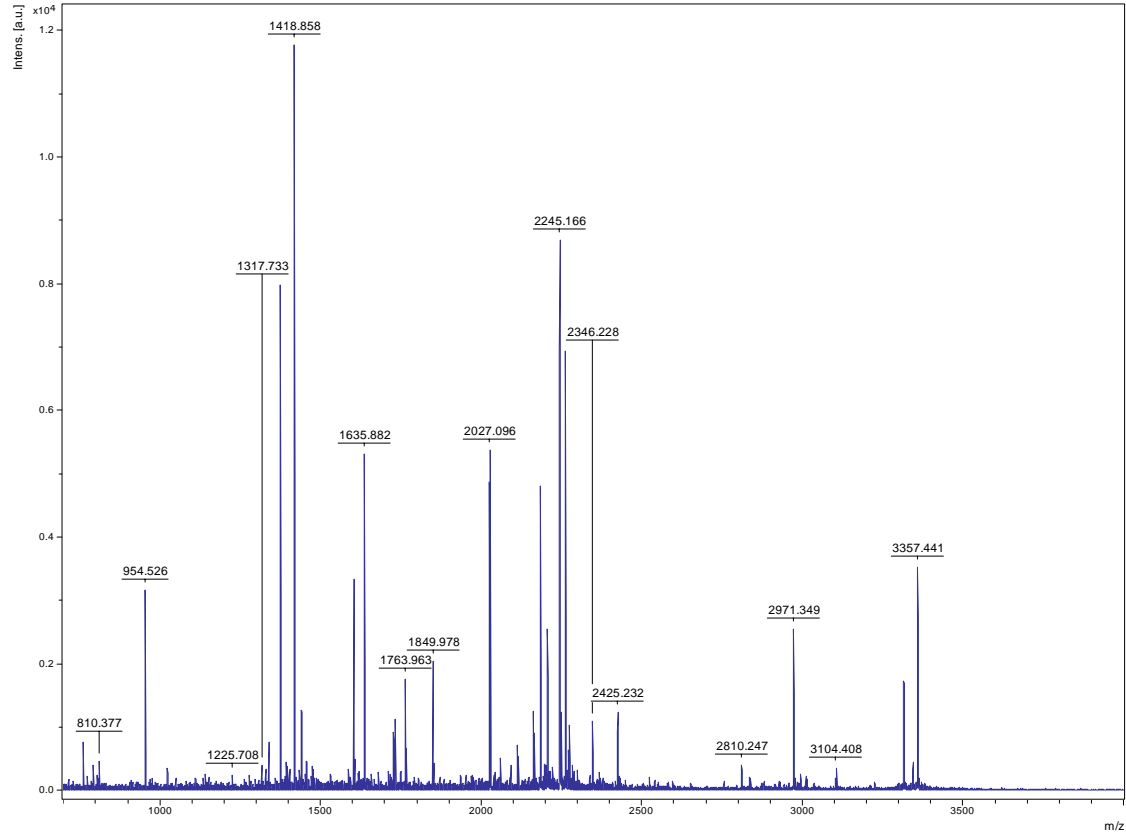

Match to: gj115434516 Score: 151 Expect: 1.1e-10

### Matched peptides:

| Start - End | Observed  | Mr (expt) | Mr (calc) | ppm | Miss Sequence                      |
|-------------|-----------|-----------|-----------|-----|------------------------------------|
| 5 - 12      | 954.5261  | 953.5188  | 953.4760  | 45  | 0 K.FFVGGNWK.C                     |
| 26 - 53     | 3011.4299 | 3010.4226 | 3010.6631 | -80 | 0 K.ILNEGQIASTDVVEVVSPPPYVFLPVVK.S |
| 54 - 70     | 2027.0962 | 2026.0889 | 2026.0418 | 23  | 0 K.SQLRPEIQVAAQNCWVK.K            |
| 101 - 113   | 1394.7527 | 1393.7454 | 1393.6725 | 52  | 0 R.SLLGESNEFVGDK.V                |
| 101 - 123   | 2425.2321 | 2424.2248 | 2424.2536 | -12 | 1 R.SLLGESNEFVGDKVAYALSQGLK.V      |
| 124 - 135   | 1374.7731 | 1373.7658 | 1373.6973 | 50  | 0 K.VIACVGETLEQR.E                 |
| 155 - 175   | 2346.2285 | 2345.2212 | 2345.2420 | -9  | 1 R.IKDWTNVVYAYEPVWAIGTK.V         |
| 176 - 190   | 1635.8815 | 1634.8742 | 1634.8013 | 45  | 0 K.VATPDQAQEVHDGLR.K              |
| 176 - 191   | 1763.9627 | 1762.9554 | 1762.8962 | 34  | 1 K.VATPDQAQEVHDGLR.K              |
| 191 - 206   | 1731.9699 | 1730.9626 | 1730.8951 | 39  | 1 R.KWLAANVSAEVAESTR.I             |
| 192 - 206   | 1603.8876 | 1602.8803 | 1602.8002 | 50  | 0 K.WLAANVSAEVAESTR.I              |
| 207 - 219   | 1339.7437 | 1338.7364 | 1338.6602 | 57  | 0 R.IYGGSVTGANCK.E                 |

Spot 2257

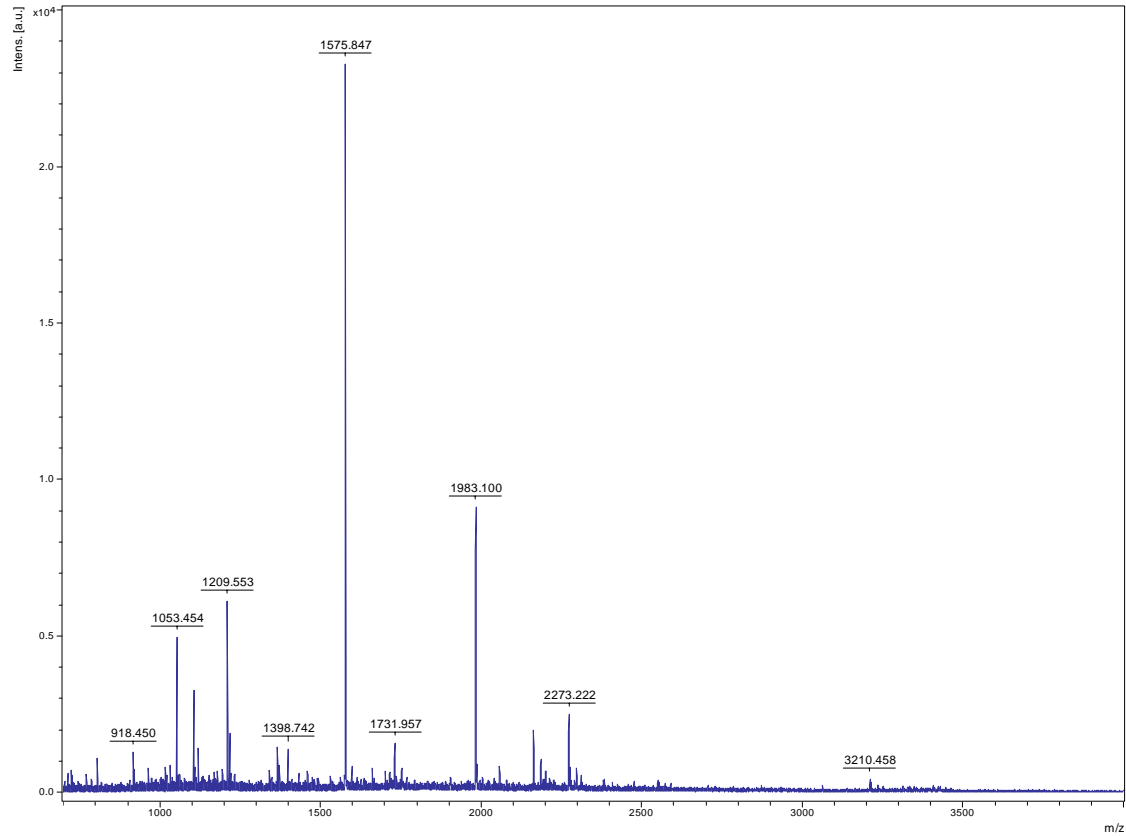

Match to: gi|51535468 Score: 84 Expect: 0.00027

Matched peptides:

| Start - End | Observed  | Mr (expt) | Mr (calc) | Delta   | Miss Sequence                                  |
|-------------|-----------|-----------|-----------|---------|------------------------------------------------|
| 18 - 26     | 1053.4582 | 1052.4509 | 1052.4709 | -0.0200 | 0 K.NCFAIASDR.R Carbamidomethyl (C)            |
| 18 - 27     | 1209.5675 | 1208.5602 | 1208.5720 | -0.0118 | 1 K.NCFAIASDRR.L Carbamidomethyl (C)           |
| 28 - 41     | 1575.8608 | 1574.8535 | 1574.8416 | 0.0119  | 0 R.LGVQLQTVATDFQR.V                           |
| 45 - 66     | 2476.3451 | 2475.3378 | 2475.3121 | 0.0257  | 1 K.IHDKLYIGLSGLATDAQTLYQR.L                   |
| 49 - 66     | 1983.0796 | 1982.0723 | 1982.0472 | 0.0251  | 0 K.LYIGLSGLATDAQTLYQR.L                       |
| 73 - 80     | 1106.5823 | 1105.5750 | 1105.5880 | -0.0129 | 1 K.LYQLREER.D                                 |
| 81 - 98     | 2041.0974 | 2040.0901 | 2040.0601 | 0.0300  | 0 R.DMKPQTFASLVSALLYEK.R                       |
| 81 - 98     | 2057.1166 | 2056.1093 | 2056.0550 | 0.0543  | 0 R.DMKPQTFASLVSALLYEK.R Oxidation (M)         |
| 81 - 99     | 2213.2083 | 2212.2010 | 2212.1561 | 0.0449  | 1 R.DMKPQTFASLVSALLYEK.R.F Oxidation (M)       |
| 177 - 195   | 2078.0390 | 2077.0317 | 2077.0553 | -0.0236 | 0 R.DCLSGWGGFVLLVTPTEV.K.E Carbamidomethyl (C) |

### Spot 2269

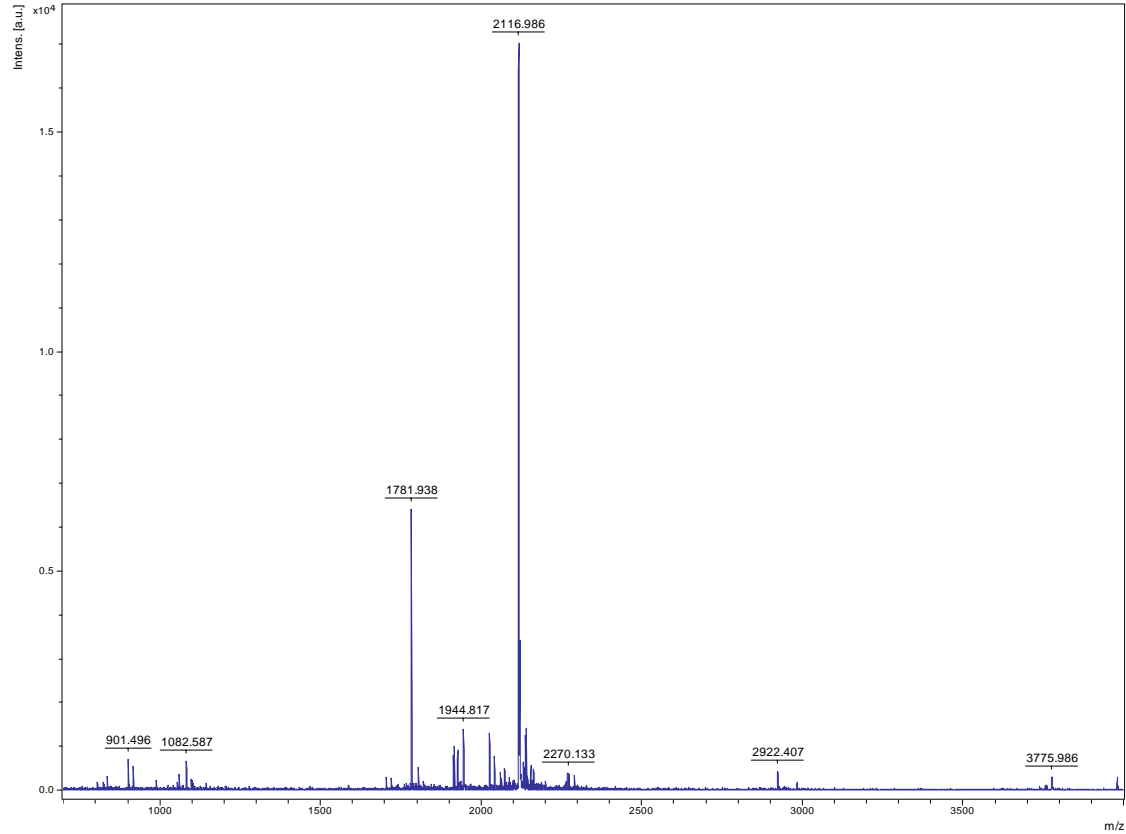

Match to: gi|77548365 Score: 67 Expect: 0.013

#### Matched peptides:

| Start - End | Observed  | Mr (expt) | Mr (calc) | Delta   | Miss Sequence                                                |
|-------------|-----------|-----------|-----------|---------|--------------------------------------------------------------|
| 34 - 53     | 2199.0118 | 2198.0045 | 2198.0412 | -0.0367 | 1 K.TTEIGEDASPMYKEQIASTK.I                                   |
| 63 - 89     | 2981.5373 | 2980.5300 | 2980.3906 | 0.1395  | 1 K.HSSLSACENITSEAVNFLSEKIQDK.I                              |
| 85 - 91     | 900.3527  | 899.3454  | 899.5188  | -0.1734 | 1 K.QIQDKIR.T                                                |
| 90 - 107    | 2153.9575 | 2152.9502 | 2153.0575 | -0.1073 | 1 K.IRTILHDTCSQTFSEQK.C                                      |
| 123 - 139   | 2024.9648 | 2023.9575 | 2024.0335 | -0.0760 | 1 K.IAEIKPAAFCKQYGLCR.D 2 Carbamidomethyl (C)                |
| 149 - 166   | 2162.0581 | 2161.0508 | 2160.9820 | 0.0689  | 0 K.SESTCLFCHHIDEITSK.L Acetyl (N-term); Carbamidomethyl (C) |
| 169 - 186   | 2160.0279 | 2159.0206 | 2159.0820 | -0.0613 | 1 K.DPDAEFIIQLLKECNK.I Acetyl (N-term)                       |
| 197 - 215   | 2261.0721 | 2260.0648 | 2260.2540 | -0.1892 | 1 R.MVLQYVPLVLVNGEKLEK.N Acetyl (N-term)                     |
| 212 - 229   | 2069.9152 | 2068.9079 | 2068.9380 | -0.0300 | 1 K.FLEKNDVCAMIQACDAGK.R 2 Carbamidomethyl (C)               |

## Spot 2275

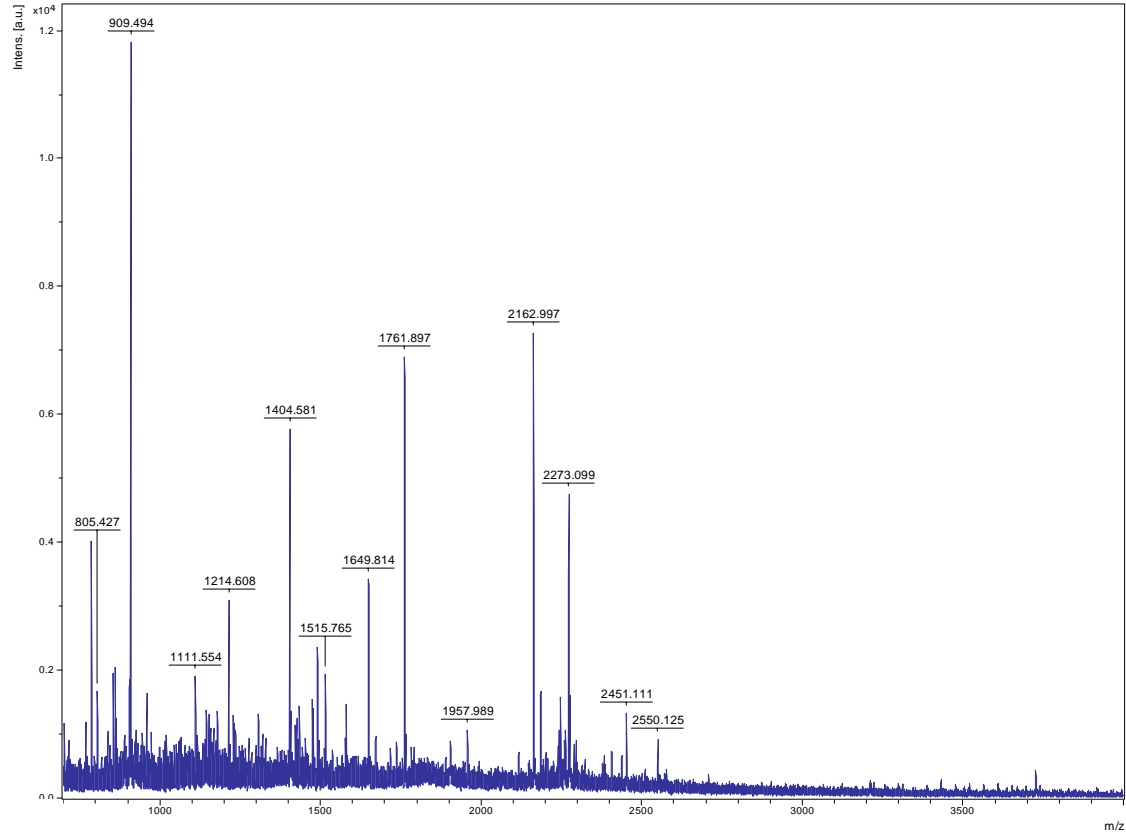

Match to: gi|34912576 Score: 76 Expect: 0.0015

### Matched peptides:

| Start - End | Observed  | Mr (expt) | Mr (calc) | Delta   | Miss Sequence                                   |
|-------------|-----------|-----------|-----------|---------|-------------------------------------------------|
| 2 - 15      | 1649.8138 | 1648.8066 | 1648.8096 | -0.0031 | 0 M.ALPNQQTVDYPSFK.L Acetyl (N-term)            |
| 33 - 40     | 960.4857  | 959.4784  | 959.4712  | 0.0072  | 0 R.HLTGEFEK.K                                  |
| 41 - 61     | 2451.1106 | 2450.1033 | 2450.1940 | -0.0906 | 1 K.KYEPTIGVEVHPLDFFTNCGK.I Carbamidomethyl (C) |
| 64 - 74     | 1404.5811 | 1403.5738 | 1403.5816 | -0.0078 | 0 R.FYCWDTAGQEKF Carbamidomethyl (C)            |
| 80 - 98     | 2245.9670 | 2244.9598 | 2245.0296 | -0.0698 | 0 R.DGYYIHGQCAIMFDVTSRL Carbamidomethyl (C)     |
| 103 - 109   | 909.4938  | 908.4866  | 908.4617  | 0.0249  | 0 K.NVPTWHR.D                                   |
| 114 - 126   | 1515.7649 | 1514.7576 | 1514.7585 | -0.0009 | 0 R.VCENIPVLCGNK.V 2 Carbamidomethyl (C)        |
| 146 - 155   | 1214.6080 | 1213.6008 | 1213.5979 | 0.0029  | 0 K.NLQYYEVSAR.S                                |
| 156 - 169   | 1761.8966 | 1760.8893 | 1760.8885 | 0.0008  | 0 K.SNYNFEKPFYLR.K                              |

## Spot 2283

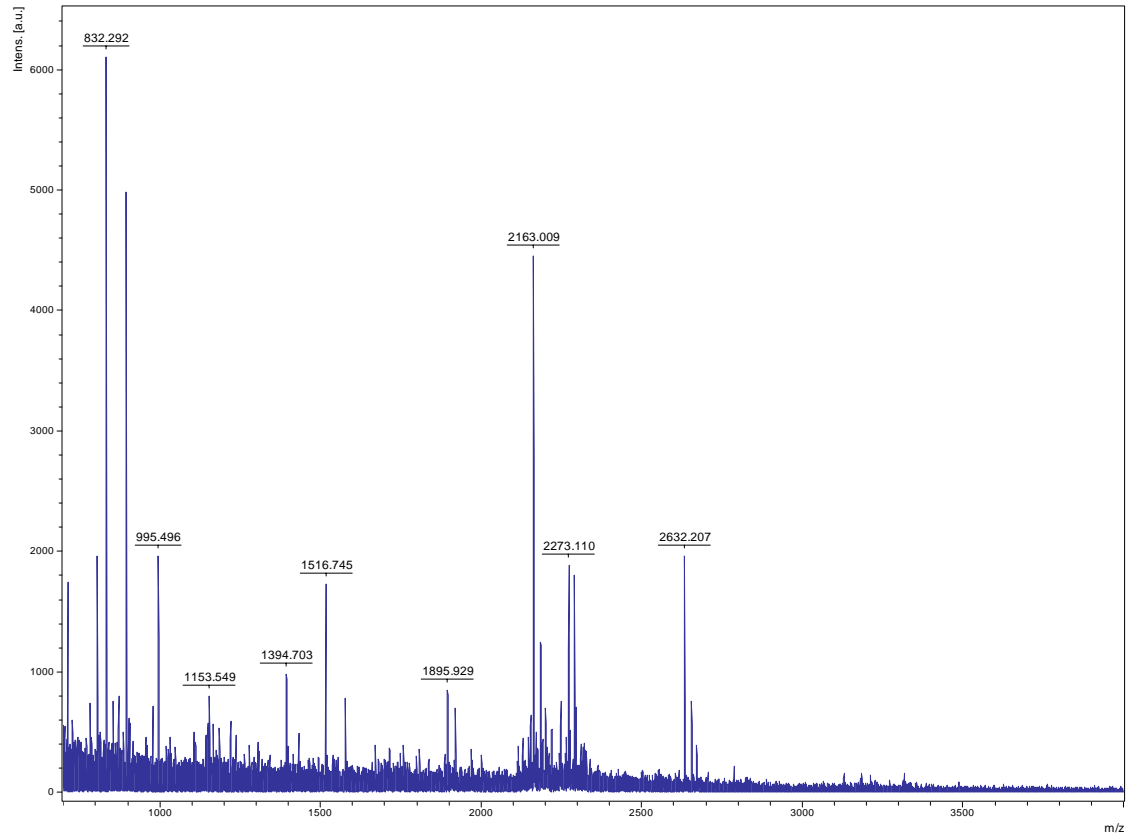

Match to: gi|51964836; Score: 74

### Matched peptides:

| Start - End | Observed | Mr (expt) | Mr (calc) | Delta | Miss Sequence               |
|-------------|----------|-----------|-----------|-------|-----------------------------|
| 13 - 26     | 1576.85  | 1575.85   | 1575.89   | -0.04 | 1 IDKVYITVQLADAK            |
| 16 - 26     | 1220.64  | 1219.64   | 1219.68   | -0.04 | 0 VYITVQLADAK               |
| 30 - 54     | 2632.21  | 2631.20   | 2631.23   | -0.03 | 0 VNLEPÉGVFSFSATAGTDGNLYESK |
| 55 - 67     | 1516.74  | 1515.74   | 1515.78   | -0.04 | 1 LELNDKVNVEESK             |
| 74 - 81     | 995.50   | 994.49    | 994.52    | -0.02 | 0 SIFCIVEK                  |
| 74 - 85     | 1394.70  | 1393.70   | 1393.73   | -0.03 | 1 SIFCIVEKAEAK              |
| 90 - 96     | 873.47   | 872.47    | 872.47    | -0.00 | 1 LVRDDQK                   |
| 93 - 102    | 1184.58  | 1183.58   | 1183.60   | -0.02 | 1 DDQKAPHVK                 |

## Spot 2289

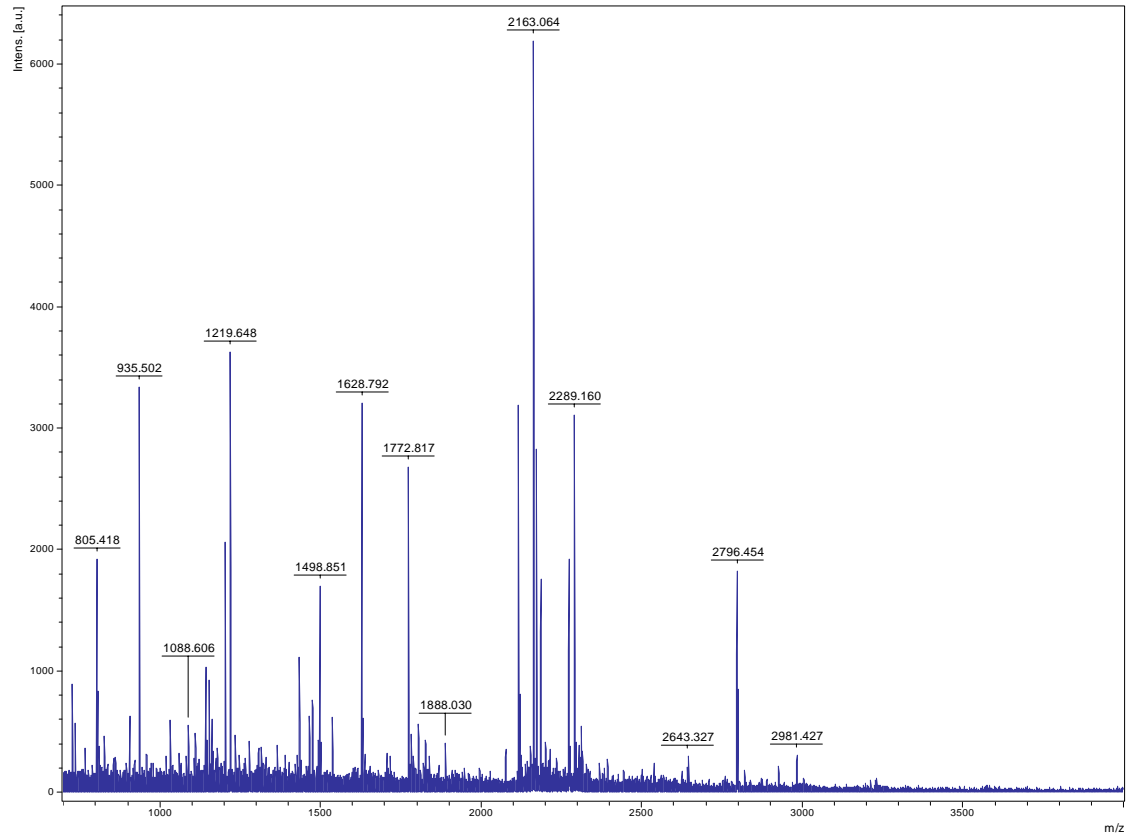

Match to: gi|14140144; Score: 92

### Matched peptides:

| Start - End | Observed | Mr (expt) | Mr (calc) | Delta | Miss Sequence                 |
|-------------|----------|-----------|-----------|-------|-------------------------------|
| 111 - 137   | 2796.45  | 2795.45   | 2795.42   | 0.03  | 0 LGSFAFVGLPTAAYPTPFVAPGEETTR |
| 138 - 153   | 1628.79  | 1627.79   | 1627.78   | 0.01  | 0 YAVIIGGANFGCGSSR            |
| 154 - 166   | 1219.65  | 1218.65   | 1218.65   | -0.00 | 0 EHAPVALGAAGAR               |
| 167 - 175   | 935.50   | 934.50    | 934.49    | 0.01  | 0 AVVAEGYAR                   |
| 167 - 179   | 1498.85  | 1497.85   | 1497.81   | 0.04  | 1 AVVAEGYARIFFR               |
| 180 - 199   | 2121.06  | 2120.05   | 2120.04   | 0.01  | 0 NSVATGEVYPLELADTGAWK        |
| 203 - 223   | 2289.16  | 2288.16   | 2288.08   | 0.08  | 0 TGDVVTVELDNCVMINHTSGK       |
| 227 - 247   | 2115.17  | 2114.17   | 2114.15   | 0.02  | 0 LKPIGDAGPVIEAGGIFAYAR       |

### Spot 2291

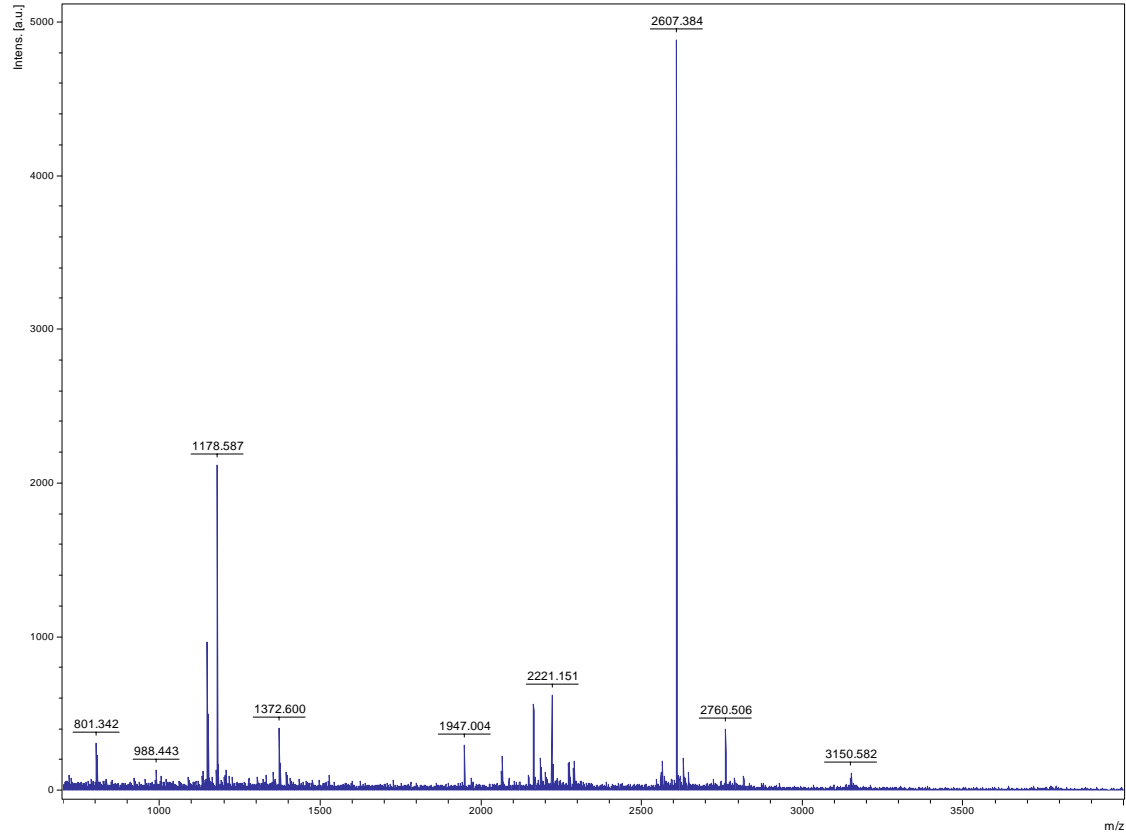

Match to: gi|51090748; Score: 130

#### Matched peptides:

| Start - End | Observed | Mr (expt) | Mr (calc) | Delta | Miss Sequence                 |
|-------------|----------|-----------|-----------|-------|-------------------------------|
| 58 - 67     | 1149.60  | 1148.59   | 1148.62   | -0.03 | 0 YTSKPLGDR                   |
| 79 - 105    | 2607.38  | 2606.38   | 2606.40   | -0.02 | 0 TVGGILLPSTAQSKPQGGEVVAVGEGR |
| 127 - 138   | 1372.60  | 1371.60   | 1371.63   | -0.03 | 0 YAGTEVQFNDTK                |
| 158 - 165   | 988.44   | 987.44    | 987.48    | -0.04 | 0 DMKPLNDR                    |
| 170 - 188   | 1947.00  | 1946.00   | 1946.02   | -0.02 | 1 VAEAEDKTAGGLILTETTK         |
| 189 - 209   | 2065.03  | 2064.03   | 2064.07   | -0.04 | 0 EKPSIGTVVAVGPGPLDDEGK       |
| 189 - 210   | 2221.15  | 2220.15   | 2220.17   | -0.03 | 1 EKPSIGTVVAVGPGPLDDEGKR      |
| 226 - 232   | 801.34   | 800.34    | 800.37    | -0.03 | 0 YAGSEFK                     |
| 233 - 243   | 1178.59  | 1177.58   | 1177.61   | -0.02 | 0 GADGTNYIVLR                 |



### Spot 2296

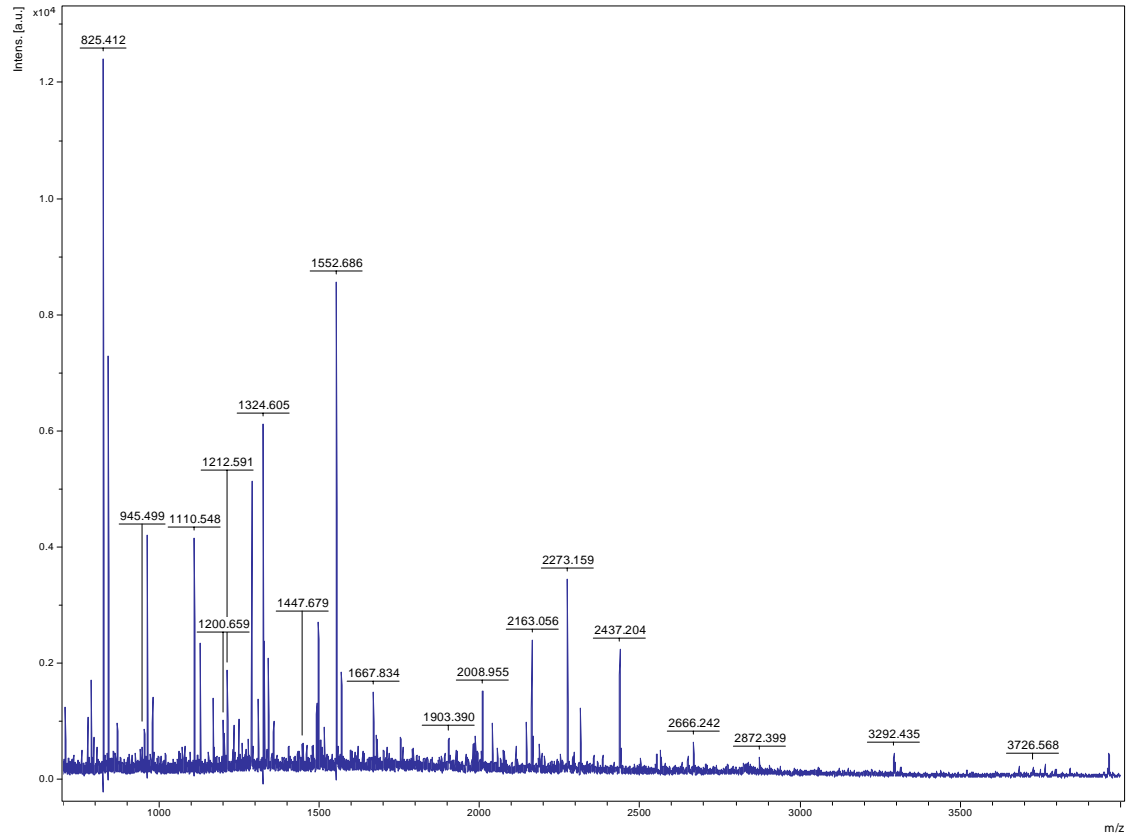

Match to: gi|169805 Score: 79 Expect: 0.0016

#### Matched peptides:

| Start - End | Observed  | Mr (expt) | Mr (calc) | Delta   | Miss Sequence                               |
|-------------|-----------|-----------|-----------|---------|---------------------------------------------|
| 27 - 37     | 1289.6223 | 1288.6150 | 1288.5718 | -0.0433 | 0 R.EVQDSPLDACR.Q                           |
| 38 - 47     | 1168.6125 | 1167.6053 | 1167.6360 | -0.0308 | 1 R.QVLDLDRQLTGR.E Gln->pyro-Glu (N-term Q) |
| 48 - 55     | 1110.5720 | 1109.5647 | 1109.5440 | 0.0207  | 1 R.ERFQPMFR.R                              |
| 50 - 55     | 825.4010  | 824.3937  | 824.4003  | -0.0066 | 0 R.FQPMFR.R                                |
| 50 - 55     | 841.4099  | 840.4026  | 840.3952  | 0.0073  | 0 R.FQPMFR.R Oxidation (M)                  |
| 56 - 63     | 839.5231  | 838.5158  | 838.5137  | 0.0021  | 0 R.RPGALGLR.M                              |
| 64 - 75     | 1552.7600 | 1551.7527 | 1551.6592 | 0.0935  | 0 R.MQCCQLQDVSR.E                           |
| 150 - 160   | 1324.6550 | 1323.6478 | 1323.6064 | 0.0414  | 0 R.QYAAQLPSMCR.V                           |
| 150 - 160   | 1340.6763 | 1339.6690 | 1339.6013 | 0.0677  | 0 R.QYAAQLPSMCR.V Oxidation (M)             |

# Spot 2299

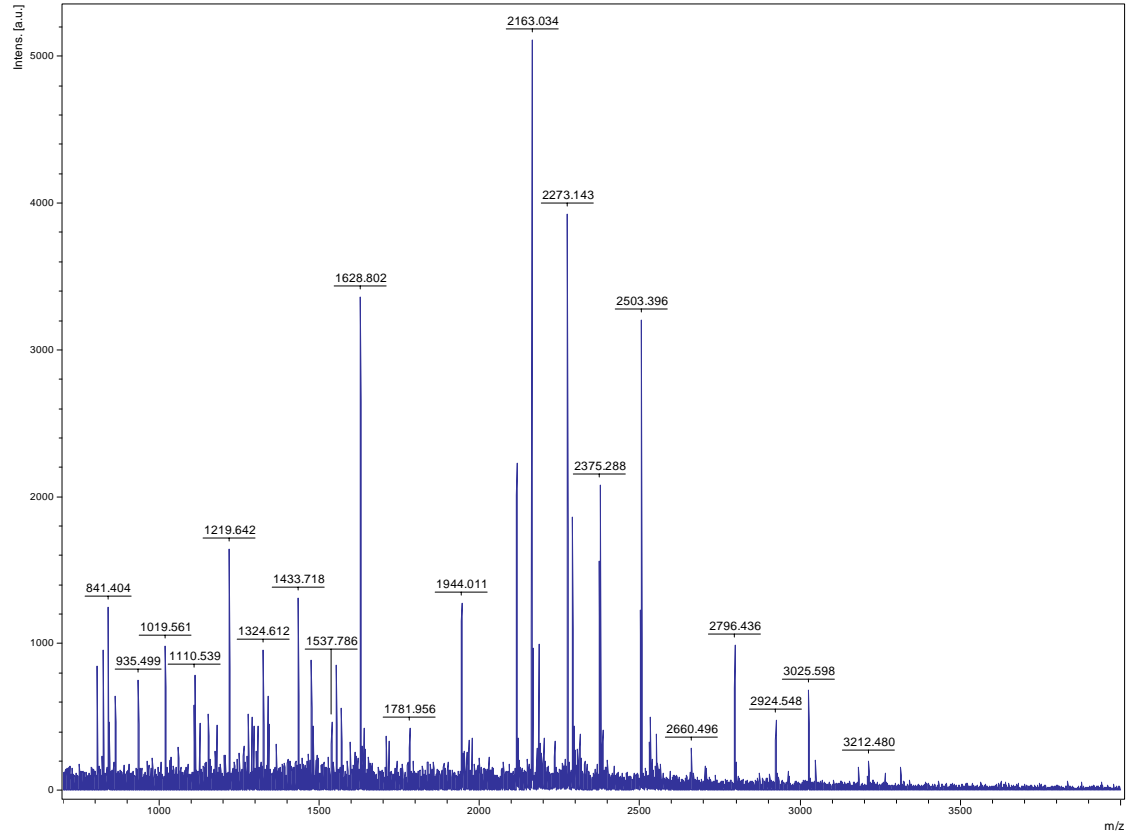

Match to: gi|29367567 Score: 79

| Start - End | Observed  | Mr (expt) | Mr (calc) | Delta   | Miss Sequence                   |
|-------------|-----------|-----------|-----------|---------|---------------------------------|
| 1 - 7       | 863.4642  | 862.4570  | 862.4582  | -0.0012 | 1 -MNVDKL.K Oxidation (M)       |
| 46 - 72     | 3025.5977 | 3024.5904 | 3024.5919 | -0.0015 | 1 R.VGVNIPGIEEVNIFKDDVVIQFQPK.V |
| 73 - 91     | 1944.0111 | 1943.0038 | 1943.0112 | -0.0074 | 0 K.VQASIGANTWVVSGETPQTK.K      |
| 92 - 113    | 2503.3965 | 2502.3892 | 2502.3805 | -0.0087 | 1 K.KLQDLLPTIINQLGPDNLDNLR.R    |
| 93 - 113    | 2375.2876 | 2374.2803 | 2374.2856 | -0.0053 | 0 K.LQDLLPTIINQLGPDNLDNLR.R     |
| 93 - 114    | 2531.3901 | 2530.3829 | 2530.3867 | -0.0038 | 1 K.LQDLLPTIINQLGPDNLDNLR.L     |
| 114 - 121   | 1019.5607 | 1018.5535 | 1018.5559 | -0.0025 | 1 R.RLAEQFQK.Q                  |

# Spot 2302

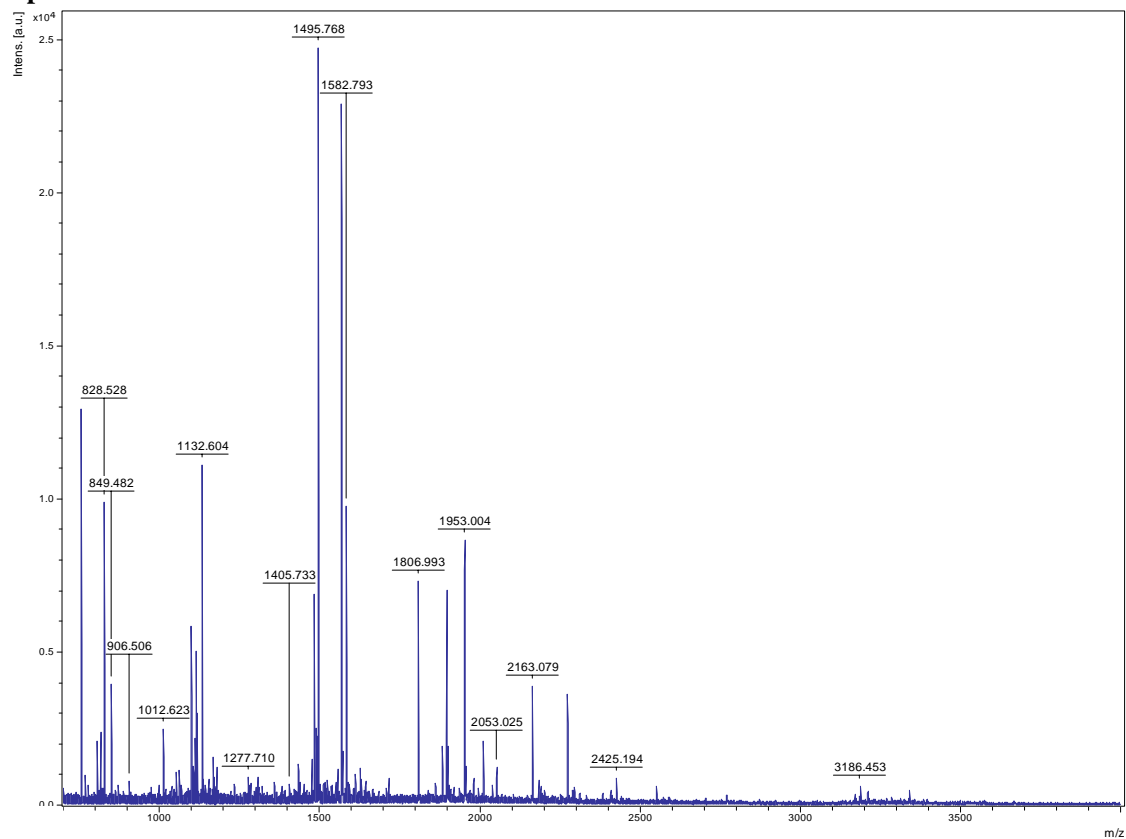

Match to: gi|51979378 Score: 146 Expect: 1.7e-10

## Matched peptides:

| Start - End | Observed  | Mr (expt) | Mr (calc) | Delta   | Miss Sequence                                         |
|-------------|-----------|-----------|-----------|---------|-------------------------------------------------------|
| 45 - 54     | 1099.5261 | 1098.5188 | 1098.5128 | 0.0061  | 0 R.TSTGMYVANR.A                                      |
| 45 - 54     | 1115.5155 | 1114.5082 | 1114.5077 | 0.0005  | 0 R.TSTGMYVANR.A Oxidation (M)                        |
| 55 - 70     | 1896.9638 | 1895.9565 | 1895.9411 | 0.0154  | 1 R.ASDKITQLTDNVYICR.S Carbamidomethyl (C)            |
| 59 - 70     | 1495.7886 | 1494.7813 | 1494.7500 | 0.0313  | 0 K.ITQLTDNVYICR.S Carbamidomethyl (C)                |
| 71 - 85     | 1568.7800 | 1567.7727 | 1567.7478 | 0.0250  | 0 R.SGSAADTVISDYVR.Y                                  |
| 86 - 102    | 1981.0668 | 1980.0595 | 1980.0581 | 0.0014  | 0 R.YFLHQHTIQLGQPATVK.V                               |
| 110 - 116   | 849.4221  | 848.4148  | 848.4756  | -0.0607 | 0 R.LLAYQNK.N                                         |
| 117 - 130   | 1535.7750 | 1534.7677 | 1534.7272 | 0.0406  | 0 K.NMLQAGMIVGGWDK.Y Oxidation (M)                    |
| 117 - 130   | 1551.7530 | 1550.7457 | 1550.7221 | 0.0236  | 0 K.NMLQAGMIVGGWDK.Y 2 Oxidation (M)                  |
| 117 - 147   | 3339.4382 | 3338.4309 | 3338.6790 | -0.2481 | 1 K.NMLQAGMIVGGWDKYEGGQIFSVPLGGTILR.Q 2 Oxidation (M) |
| 131 - 147   | 1806.9914 | 1805.9841 | 1805.9675 | 0.0166  | 0 K.YEGGQIFSVPLGGTILR.Q                               |
| 148 - 169   | 2425.1666 | 2424.1593 | 2424.1749 | -0.0156 | 0 R.QPFAIGGSGSSYLYGLLDHEWK.E                          |
| 170 - 179   | 1153.5692 | 1152.5619 | 1152.4604 | 0.1015  | 0 K.EGMSQEEAEK.F Oxidation (M)                        |
| 170 - 183   | 1610.8113 | 1609.8040 | 1609.7657 | 0.0383  | 1 K.EGMSQEEAEKVVK.V                                   |
| 170 - 183   | 1626.7970 | 1625.7897 | 1625.7606 | 0.0291  | 1 K.EGMSQEEAEKVVK.V Oxidation (M)                     |
| 192 - 200   | 817.3495  | 816.3422  | 816.4089  | -0.0667 | 0 R.DGASGGVVR.T                                       |
| 201 - 211   | 1132.5966 | 1131.5893 | 1131.5884 | 0.0010  | 0 R.TVTINADGVSR.K                                     |
| 212 - 218   | 828.4614  | 827.4541  | 827.4290  | 0.0252  | 1 R.KFHPGDK.L                                         |
| 219 - 246   | 3186.3833 | 3185.3760 | 3185.5703 | -0.1942 | 0 K.LQLWHEELEPQNSLLDILAAGNPPDMVQ.- Oxidation (M)      |

### Spot 2307

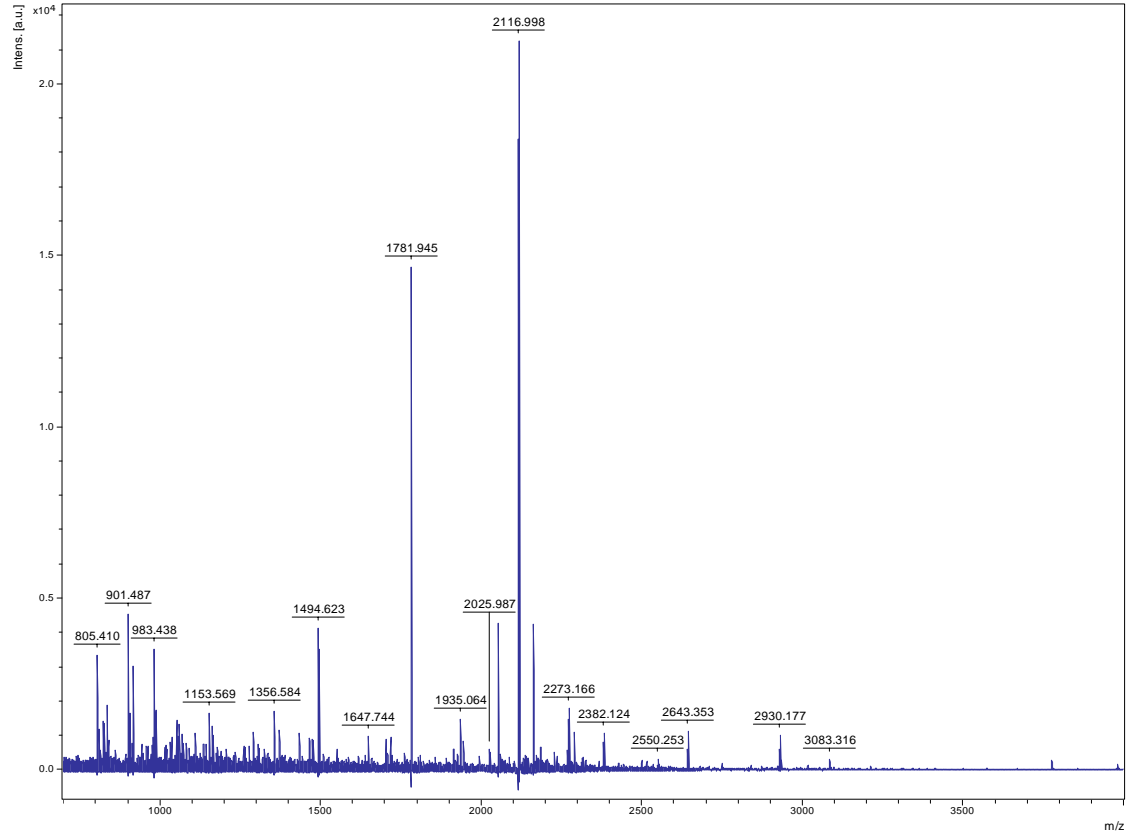

Match to: gi|41052743; Score: 72

#### Matched peptides:

| Start - End | Observed | Mr (expt) | Mr (calc) | Delta | Miss Sequence                 |
|-------------|----------|-----------|-----------|-------|-------------------------------|
| 19 - 40     | 2382.13  | 2381.13   | 2381.12   | 0.01  | 0 GFGFISPDGSEDLFVHQSSIK       |
| 46 - 64     | 2052.93  | 2051.93   | 2051.93   | 0.00  | 0 SLAEGEQVEFAISEEDGR          |
| 67 - 79     | 1291.64  | 1290.64   | 1290.65   | -0.00 | 0 AVDVTGPDGSPVK               |
| 80 - 95     | 1164.53  | 1163.53   | 1163.51   | 0.02  | 0 GGAGGGGGGGGGFGR             |
| 106 - 115   | 983.44   | 982.43    | 982.43    | 0.01  | 0 SYGGSWGGR                   |
| 117 - 128   | 1037.48  | 1036.48   | 1036.44   | 0.04  | 0 SGGGPGGGCFK                 |
| 173 - 204   | 2930.17  | 2929.16   | 2929.13   | 0.03  | 0 DCFNSGGGGGGGGGACYNCGETGHLAR |
| 225 - 237   | 1494.62  | 1493.62   | 1493.61   | 0.00  | 0 SCYNCGEAGHIAR               |

## Spot 2315

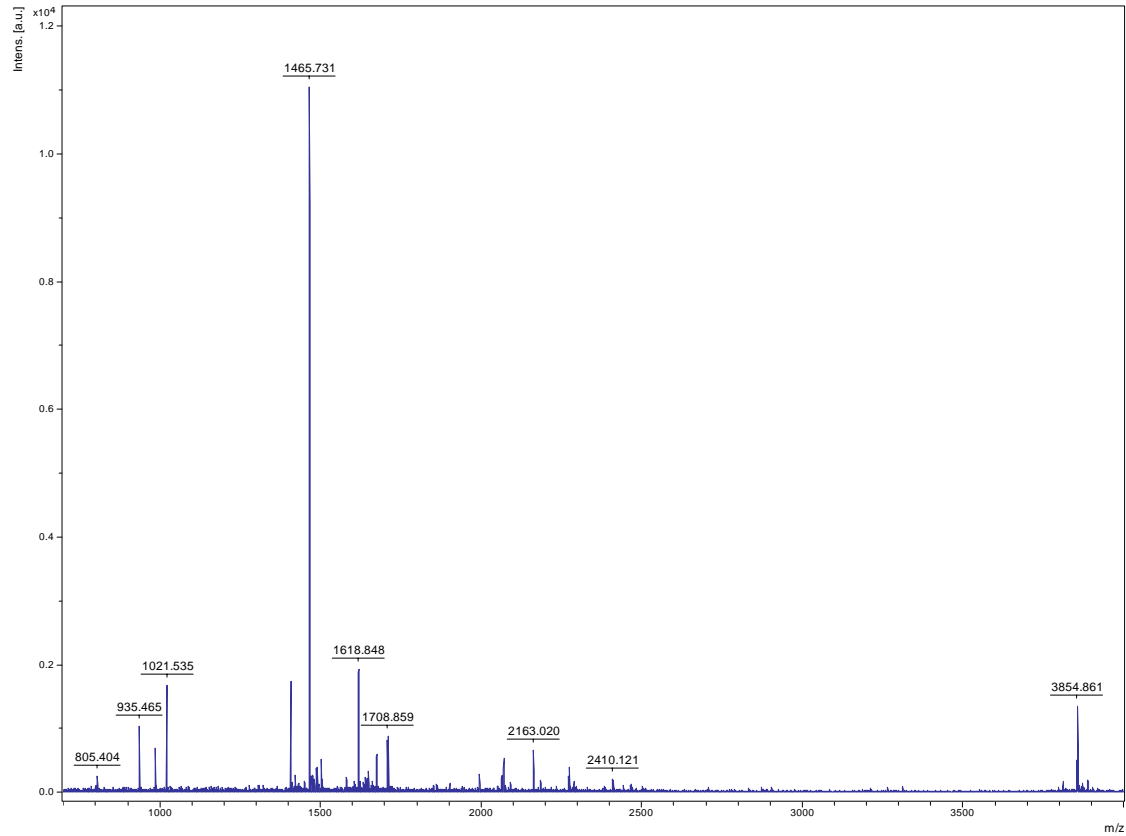

Match to: gi|1583954; Score: 101

Matched peptides:

| Start - End | Observed | Mr (expt) | Mr (calc) | Delta | Miss Sequence                             |
|-------------|----------|-----------|-----------|-------|-------------------------------------------|
| 22 - 32     | 1407.64  | 1406.63   | 1406.66   | -0.03 | 0 LTYYPPEYETK                             |
| 22 - 41     | 2410.12  | 2409.12   | 2409.17   | -0.06 | 1 LTYYPPEYETKDTDILAAFR                    |
| 33 - 41     | 1021.54  | 1020.53   | 1020.52   | -0.01 | 0 DTDILAAFR                               |
| 42 - 79     | 3854.86  | 3853.86   | 3853.86   | -0.01 | 0 VTPQPGVPPPEEAGA AVAAESSTGTWTVWTDGLTSLDR |
| 132 - 139   | 985.57   | 984.57    | 984.57    | 0.00  | 1 ALRLEDLR                                |
| 140 - 146   | 805.40   | 804.40    | 804.44    | -0.04 | 0 IPPTYSK                                 |
| 147 - 161   | 1708.86  | 1707.86   | 1707.87   | -0.01 | 1 TFQGPLPHGIQVERDK                        |
| 165 - 177   | 1502.82  | 1501.82   | 1501.84   | -0.02 | 0 YGRLLGCTIKPK                            |
| 320 - 334   | 1465.73  | 1464.73   | 1464.71   | 0.01  | 0 MSGGDHIHAGTVVGK                         |

### Spot 2317

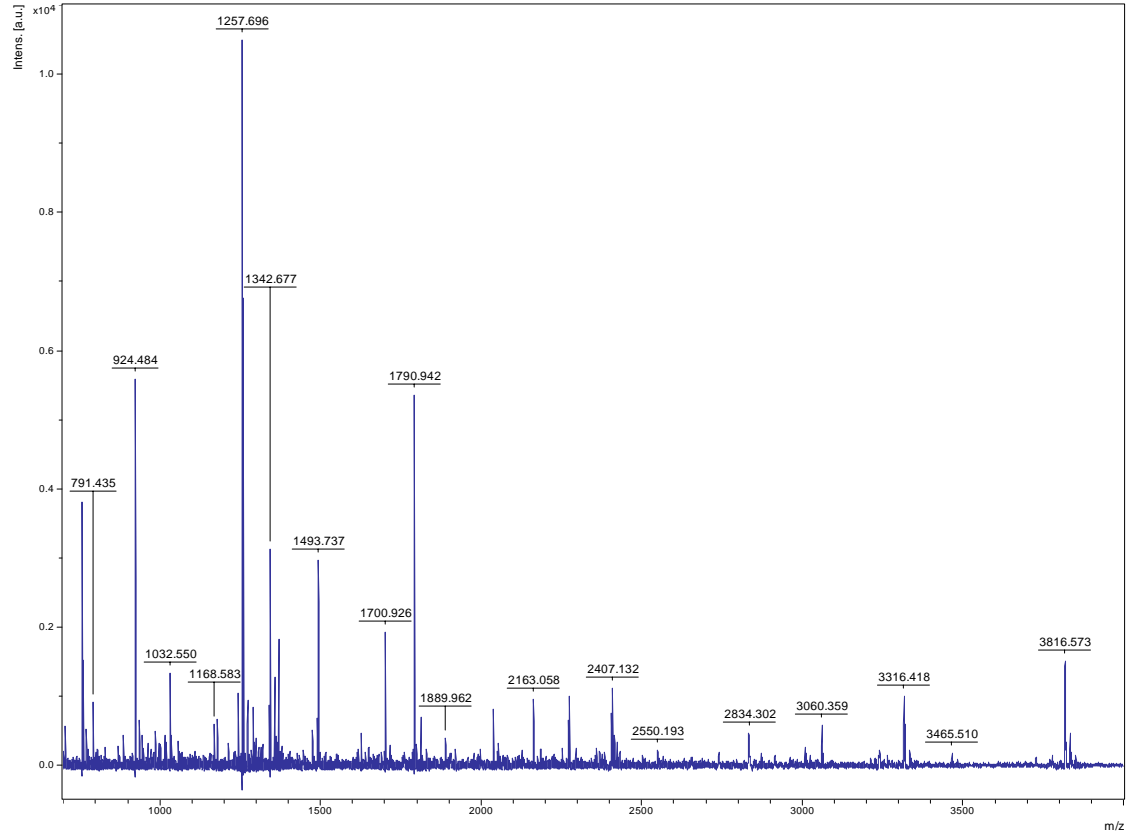

Match to: gi|50924894 Score: 85 Expect: 0.00022

#### Matched peptides:

| Start - End | Observed  | Mr (expt) | Mr (calc) | Delta   | Miss Sequence                          |
|-------------|-----------|-----------|-----------|---------|----------------------------------------|
| 2 - 12      | 1242.6735 | 1241.6662 | 1241.7230 | -0.0568 | 1 M.ASKVELVVEVKS Acetyl (N-term)       |
| 13 - 23     | 1257.6541 | 1256.6468 | 1256.6877 | -0.0409 | 1 K.SPADKLWTALR.D                      |
| 24 - 31     | 936.3169  | 935.3096  | 935.4600  | -0.1504 | 0 R.DSTELFPK.I                         |
| 32 - 38     | 924.3201  | 923.3128  | 923.4752  | -0.1624 | 0 K.IFPEQYK.S                          |
| 58 - 69     | 1342.6407 | 1341.6334 | 1341.6638 | -0.0304 | 0 K.YTEGVPMTFAK.E                      |
| 58 - 69     | 1358.6492 | 1357.6419 | 1357.6587 | -0.0168 | 0 K.YTEGVPMTFAK.E Oxidation (M)        |
| 72 - 80     | 1032.4416 | 1031.4343 | 1031.5135 | -0.0791 | 1 K.VEVADDEK.V                         |
| 81 - 96     | 1790.9734 | 1789.9661 | 1789.9137 | 0.0524  | 0 K.VVSYSVVDGELVSFYKN                  |
| 108 - 128   | 2037.0288 | 2036.0215 | 2035.9309 | 0.0907  | 0 K.GGAAAPADGAVVSWTMDFDK.A             |
| 108 - 140   | 3316.6663 | 3315.6590 | 3315.5604 | 0.0986  | 1 K.GGAAAPADGAVVSWTMDFDKASEEVPDPDVIK.E |
| 129 - 140   | 1298.6207 | 1297.6134 | 1297.6401 | -0.0267 | 0 K.ASEEVDPDVIK.E                      |

### Spot 2322

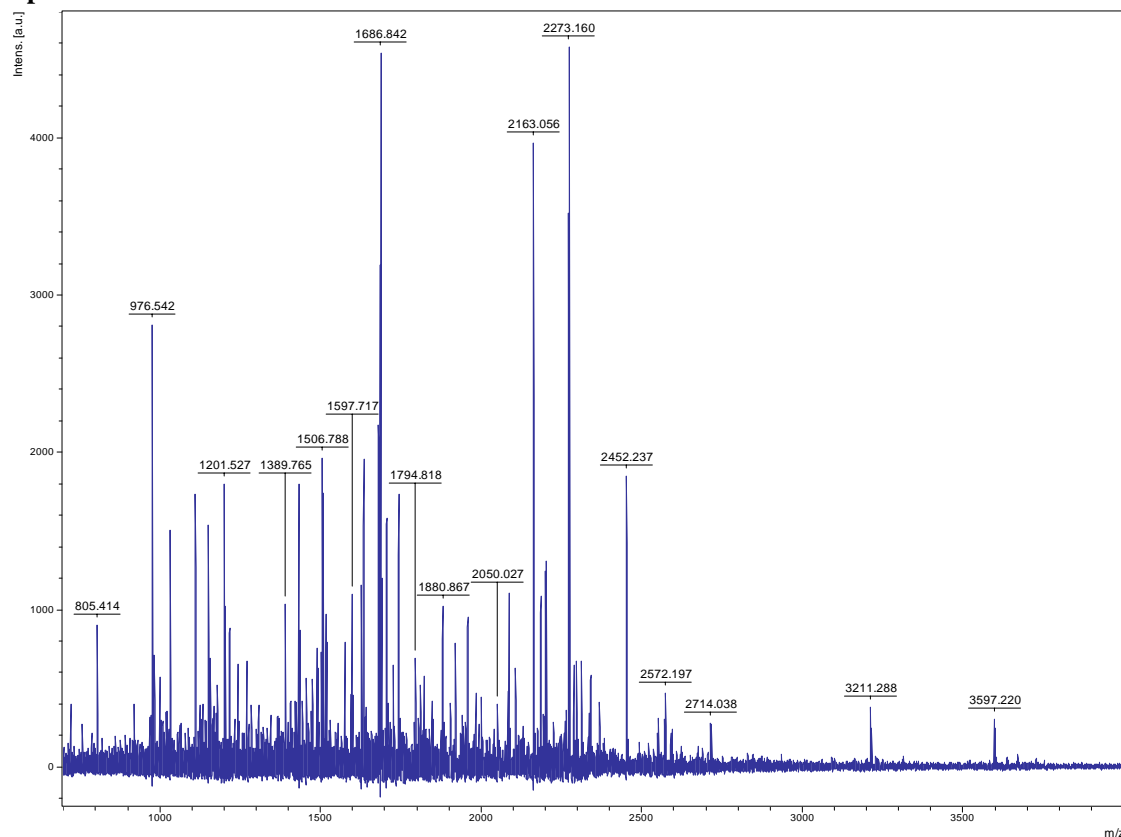

Match to: gi|50923963 Score: 181 Expect: 5.3e-14

#### Matched peptides:

| Start - End | Observed  | Mr (expt) | Mr (calc) | Delta   | Miss Sequence                                 |
|-------------|-----------|-----------|-----------|---------|-----------------------------------------------|
| 65 - 73     | 1156.6166 | 1155.6093 | 1155.6440 | -0.0347 | 1 R.RLFYVPSFK.I                               |
| 66 - 73     | 1000.4940 | 999.4867  | 999.5429  | -0.0562 | 0 R.LFYVPSFK.I                                |
| 74 - 92     | 1956.9385 | 1955.9312 | 1955.9450 | -0.0138 | 0 K.IYGGVAGLYDYGPPGCAVK.A Carbamidomethyl (C) |
| 93 - 100    | 976.4757  | 975.4684  | 975.5290  | -0.0606 | 0 K.ANVLAFWR.Q                                |
| 101 - 124   | 2714.0695 | 2713.0622 | 2713.3164 | -0.2542 | 0 R.QHFVLEEGMLEVDPCVTPPEVVK.A                 |
| 171 - 192   | 2341.2216 | 2340.2143 | 2340.1961 | -0.0183 | 0 K.TAEFNHVLAVLDDLAEQLGAK.I                   |
| 193 - 204   | 1333.7196 | 1332.7123 | 1332.7289 | -0.0165 | 1 K.IKEYGIVAPDTK.N                            |
| 254 - 266   | 1389.7602 | 1388.7529 | 1388.7564 | -0.0035 | 0 K.LPFAAAQIGQAFR.N                           |
| 254 - 272   | 2086.0929 | 2085.0856 | 2085.1119 | -0.0263 | 1 K.LPFAAAQIGQAFRNEISPR.Q                     |
| 280 - 295   | 1918.8930 | 1917.8857 | 1917.8996 | -0.0138 | 0 R.EFTLAEIEHFVDPEDK.S                        |
| 280 - 299   | 2368.1740 | 2367.1667 | 2367.1382 | 0.0285  | 1 R.EFTLAEIEHFVDPEDKSHPK.F                    |
| 300 - 313   | 1821.8797 | 1820.8724 | 1820.8555 | -0.0169 | 1 K.FRVDSDLEFFMFPR.E Oxidation (M)            |
| 302 - 313   | 1502.6904 | 1501.6831 | 1501.6911 | -0.0080 | 0 R.DVSDLEFFMFPR.E                            |
| 302 - 313   | 1518.6781 | 1517.6708 | 1517.6860 | -0.0152 | 0 R.DVSDLEFFMFPR.E Oxidation (M)              |
| 302 - 320   | 2287.1834 | 2286.1761 | 2286.0990 | 0.0771  | 1 R.DVSDLEFFMFPRQQLTGK.S                      |
| 325 - 347   | 2452.2494 | 2451.2421 | 2451.2393 | 0.0028  | 0 K.LNIGQAVSEGTVNNETLGYFIGR.V                 |
| 348 - 359   | 1409.8146 | 1408.8073 | 1408.7966 | 0.0108  | 0 R.VYFLTLQLGIDK.D                            |
| 348 - 361   | 1680.9184 | 1679.9111 | 1679.9246 | -0.0135 | 1 R.VYFLTLQLGIDK.D.L                          |
| 473 - 484   | 1366.6522 | 1365.6449 | 1365.6962 | -0.0512 | 1 K.GEVFVKVCTLQK.D Carbamidomethyl (C)        |
| 506 - 520   | 1634.8753 | 1633.8680 | 1633.8827 | -0.0147 | 1 R.KFTPSVIEPSFGIGR.I                         |
| 507 - 520   | 1506.7874 | 1505.7801 | 1505.7878 | -0.0076 | 0 K.FTPSVIEPSFGIGR.I                          |
| 521 - 536   | 2131.0579 | 2130.0506 | 2130.0179 | 0.0328  | 0 R.IIYCLFEHCFYQRPQK.A 2 Carbamidomethyl (C)  |
| 577 - 596   | 1984.0506 | 1983.0433 | 1983.0459 | -0.0025 | 0 K.ALTAAGISHIIDMTGNTIGK.R                    |
| 577 - 596   | 2000.0291 | 1999.0218 | 1999.0408 | -0.0189 | 0 K.ALTAAGISHIIDMTGNTIGK.R Oxidation (M)      |
| 598 - 621   | 2591.2378 | 2590.2305 | 2590.3602 | -0.1297 | 1 R.YARTDEIGVPLAITVDNTTTSVTVR.D               |
| 601 - 621   | 2201.1289 | 2200.1216 | 2200.1586 | -0.0370 | 0 R.TDEIGVPLAITVDNTTTSVTVR.D                  |
| 627 - 641   | 1685.8797 | 1684.8724 | 1684.8995 | -0.0271 | 1 K.DQIRVEVDEVASVVK.E                         |
| 642 - 656   | 1810.7697 | 1809.7624 | 1809.7992 | -0.0368 | 0 K.EVTDGQSTWADIMWR.Y Oxidation (M)           |
| 657 - 673   | 1792.7412 | 1791.7339 | 1791.7435 | -0.0095 | 0 R.YPAHTASAAAAEEASET.-                       |

Match to: gi|50582723 Score: 90

#### Matched peptides:

| Start - End | Observed  | Mr (expt) | Mr (calc) | Delta   | Miss Sequence                               |
|-------------|-----------|-----------|-----------|---------|---------------------------------------------|
| 77 - 90     | 1270.7390 | 1269.7317 | 1269.7404 | -0.0087 | 0 K.TVVAVILGGGAGTR.L                        |
| 99 - 110    | 1199.6921 | 1198.6849 | 1198.6822 | 0.0027  | 0 R.AKPAVPIGGAYR.L                          |
| 127 - 140   | 1625.8523 | 1624.8450 | 1624.8573 | -0.0122 | 0 K.VYILITQFNASLNR.H                        |
| 175 - 184   | 1150.5699 | 1149.5627 | 1149.5567 | 0.0060  | 0 R.WFQGTADAVR.Q                            |
| 223 - 239   | 1918.9264 | 1917.9191 | 1917.9037 | 0.0155  | 1 R.QRGADISICCLPIDDSR.A Carbamidomethyl (C) |
| 225 - 239   | 1691.7745 | 1690.7673 | 1690.7654 | 0.0018  | 0 R.GADISICCLPIDDSR.A 2 Carbamidomethyl (C) |
| 300 - 307   | 983.6340  | 982.6268  | 982.6175  | 0.0093  | 0 K.EILLNLLR.W                              |
| 308 - 326   | 2107.0684 | 2106.0611 | 2106.0534 | 0.0077  | 1 R.WRFPTANDFGSEIIPASAK.E                   |
| 347 - 361   | 1705.8552 | 1704.8479 | 1704.8471 | 0.0009  | 0 K.SFFEANLSLAEQPPR.F                       |
| 362 - 375   | 1726.7863 | 1725.7790 | 1725.7820 | -0.0031 | 0 R.FSFYDANKPMYTSR.R                        |
| 362 - 375   | 1742.8529 | 1741.8456 | 1741.7770 | 0.0687  | 0 R.FSFYDANKPMYTSR.R Oxidation (M)          |
| 388 - 403   | 1880.8669 | 1879.8597 | 1879.8557 | 0.0040  | 0 K.ITDSIISHGCFLDSR.I 2 Carbamidomethyl (C) |
| 471 - 493   | 2572.2383 | 2571.2310 | 2571.2200 | 0.0110  | 1 K.NVTNISSEGVQEADRTSEGFYR.S                |

## Spot 2328

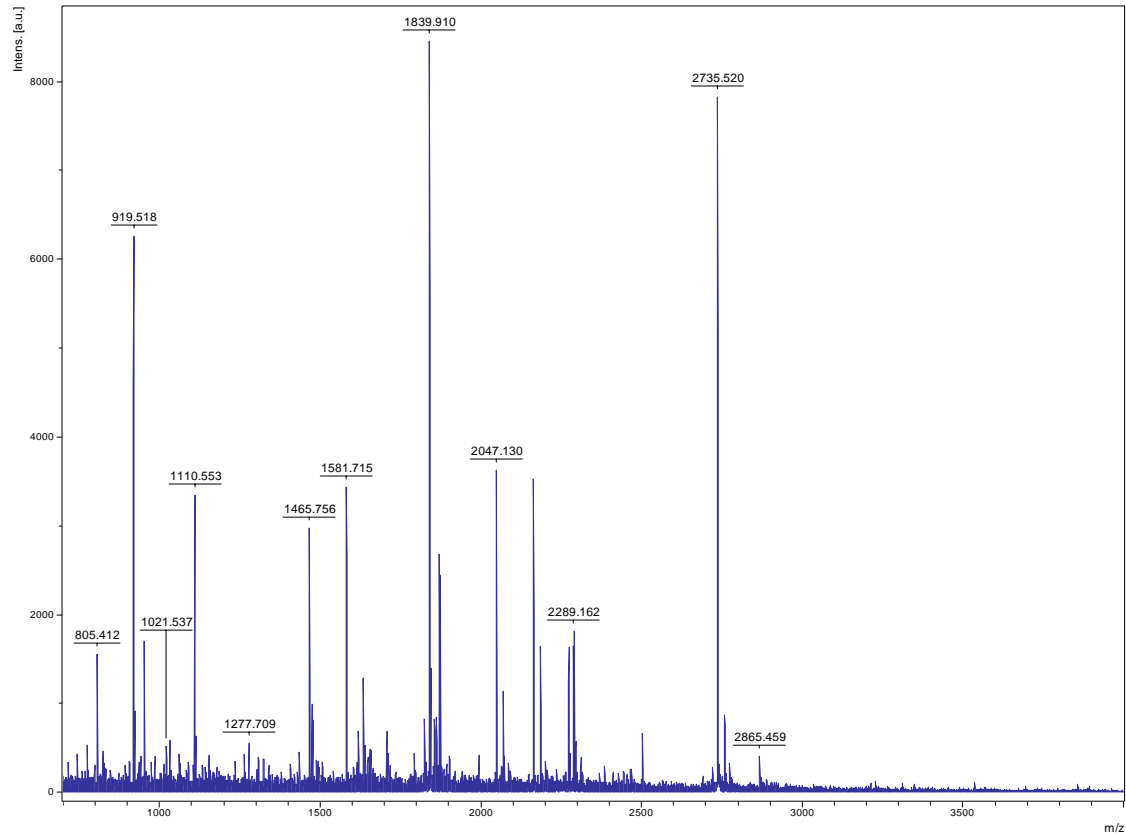

Match to: gi|53793125; Score: 69

### Matched peptides:

| Start - End | Observed | Mr (expt) | Mr (calc) | Delta | Miss Sequence                           |
|-------------|----------|-----------|-----------|-------|-----------------------------------------|
| 11 - 24     | 1581.72  | 1580.71   | 1580.70   | 0.01  | 0 SGAEVHTGHELCEK                        |
| 28 - 52     | 2735.52  | 2734.52   | 2734.48   | 0.04  | 0 ELLVELGLPDGLLPLPSLEEVGYNR             |
| 53 - 60     | 919.52   | 918.52    | 918.51    | 0.01  | 0 AAGFVWLR                              |
| 61 - 76     | 1632.79  | 1631.79   | 1631.79   | 0.00  | 0 QTQAGGATHTFDTIGK                      |
| 77 - 92     | 1822.87  | 1821.87   | 1821.87   | 0.00  | 0 QVWYAGEVTA FVEQGR Pyro-glu (N-term Q) |
| 77 - 92     | 1839.91  | 1838.91   | 1838.90   | 0.01  | 0 QVWYAGEVTA FVEQGR                     |
| 133 - 151   | 2047.13  | 2046.13   | 2046.11   | 0.01  | 1 ALPVTAFQLNPAPPEPEKK                   |



**Spot 2330**

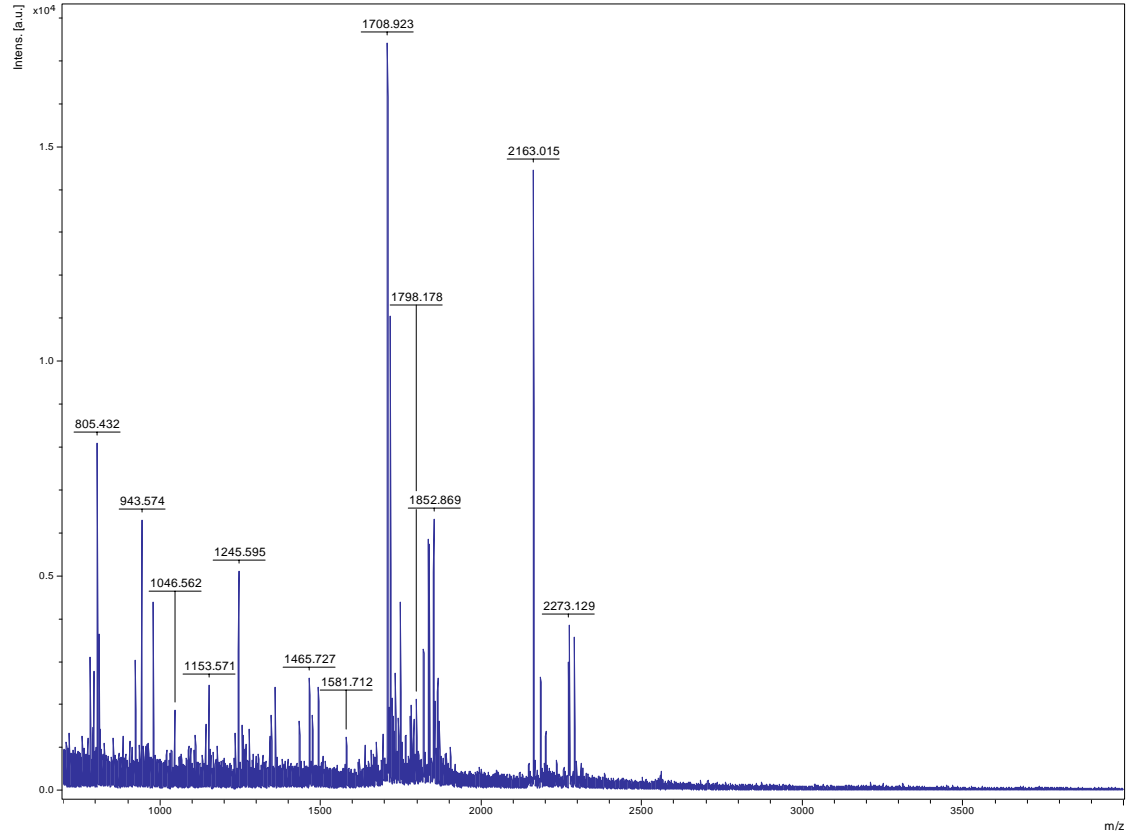

Match to: gi|50096951; Score: 92

**Matched peptides:**

| Start - End | Observed | Mr (expt) | Mr (calc) | Delta | Miss Sequence               |
|-------------|----------|-----------|-----------|-------|-----------------------------|
| 16 - 24     | 943.57   | 942.57    | 942.55    | 0.02  | 0 GLIGDIISR                 |
| 16 - 27     | 1347.74  | 1346.74   | 1346.76   | -0.01 | 1 GLIGDIISRFEK              |
| 34 - 42     | 1111.58  | 1110.58   | 1110.53   | 0.05  | 1 GMKFMNVER                 |
| 34 - 42     | 1143.58  | 1142.58   | 1142.52   | 0.06  | 1 GMKFMNVER 2 Oxidation (M) |
| 37 - 42     | 811.41   | 810.41    | 810.37    | 0.04  | 0 FMNVER Oxidation (M)      |
| 86 - 102    | 1865.02  | 1864.02   | 1864.04   | -0.02 | 1 RIIGATRPWEAAPGTIR         |
| 87 - 102    | 1708.92  | 1707.92   | 1707.94   | -0.02 | 0 IIGATRPWEAAPGTIR          |
| 103 - 111   | 979.50   | 978.50    | 978.48    | 0.02  | 0 ADYAVEVGR                 |
| 140 - 149   | 1245.59  | 1244.59   | 1244.58   | 0.01  | 0 SNLHPWIYES                |

### Spot 2331

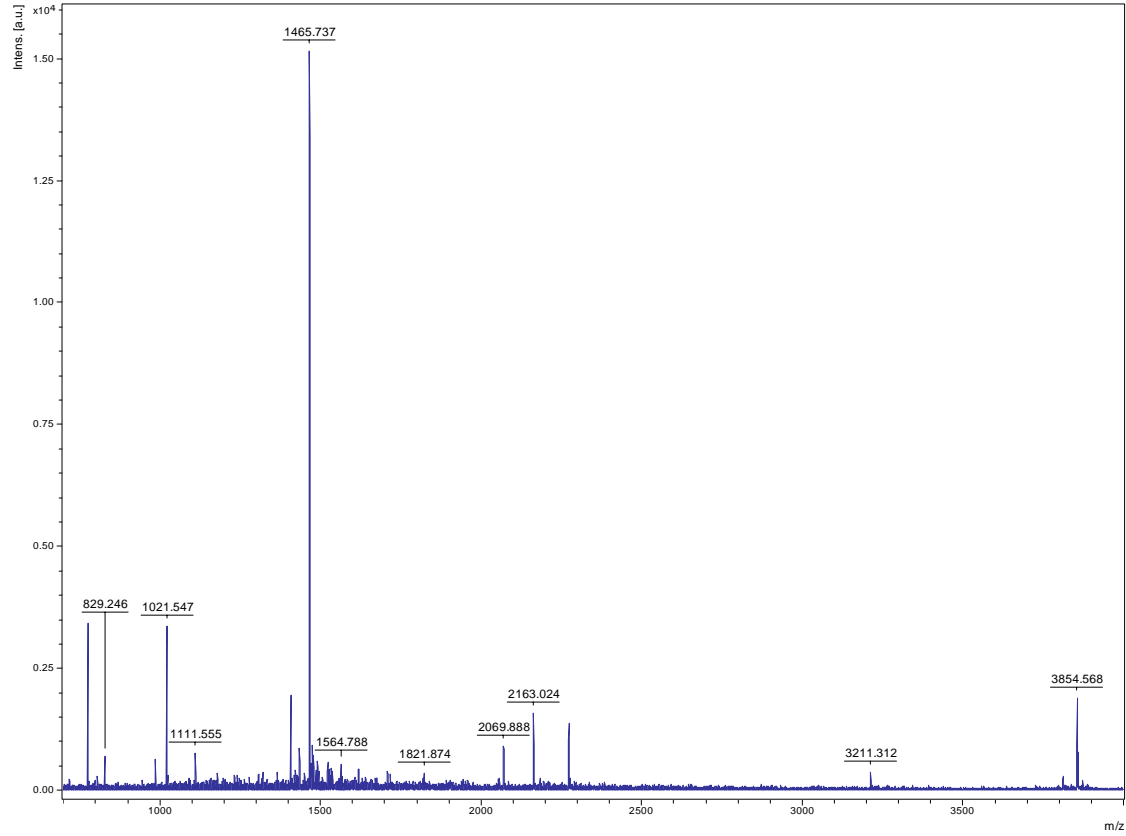

Match to: gi|113534025 Score: 84 Expect: 0.00037

#### Matched peptides:

| Start - End | Observed  | Mr (expt) | Mr (calc) | Delta   | Miss Sequence                       |
|-------------|-----------|-----------|-----------|---------|-------------------------------------|
| 22 - 32     | 1407.6569 | 1406.6496 | 1406.6605 | -0.0110 | 0 K.LTYYPPEYETK.D                   |
| 33 - 41     | 1021.5474 | 1020.5401 | 1020.5240 | 0.0162  | 0 K.DTDILAAFR.V                     |
| 132 - 139   | 985.5954  | 984.5881  | 984.5716  | 0.0165  | 1 R.ALRLDLR.I                       |
| 140 - 146   | 805.4400  | 804.4327  | 804.4381  | -0.0054 | 0 R.IPPYYSK.T                       |
| 147 - 159   | 1465.7366 | 1464.7293 | 1464.7473 | -0.0180 | 0 K.TFQGPPHGIQVER.D                 |
| 147 - 161   | 1708.8309 | 1707.8237 | 1707.8692 | -0.0456 | 1 K.TFQGPPHGIQVERDK.L               |
| 188 - 196   | 1111.5553 | 1110.5480 | 1110.5128 | 0.0352  | 0 R.ACYDSINLR.S Carbamidomethyl (C) |

### Spot 2336

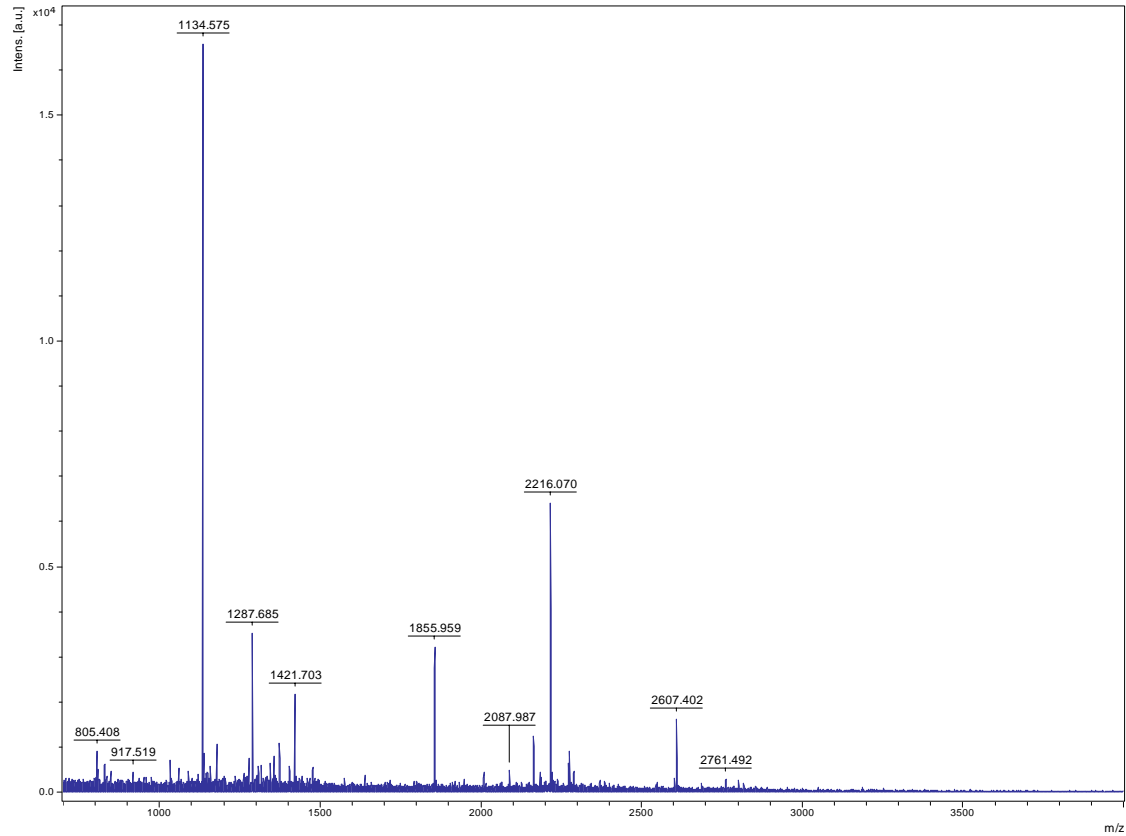

Match to: gi|77555893; Score: 78

#### Matched peptides:

| Start - End | Observed | Mr (expt) | Mr (calc) | Delta | Miss Sequence        |
|-------------|----------|-----------|-----------|-------|----------------------|
| 20 - 29     | 1134.58  | 1133.57   | 1133.58   | -0.01 | 0 TYPQQAGTIR         |
| 59 - 70     | 1421.70  | 1420.70   | 1420.72   | -0.02 | 0 CHFVAIDIFTAK       |
| 71 - 89     | 2216.07  | 2215.07   | 2215.08   | -0.01 | 1 KLEDIVPSSHNCVPHVNR |
| 72 - 89     | 2087.99  | 2086.98   | 2086.99   | -0.00 | 0 LEDIVPSSHNCVPHVNR  |
| 114 - 129   | 1855.96  | 1854.96   | 1854.97   | -0.01 | 1 DDLRLPTDDNLLSQIK   |
| 118 - 129   | 1356.70  | 1355.70   | 1355.73   | -0.03 | 0 LPTDDNLLSQIK       |

Spot 2337

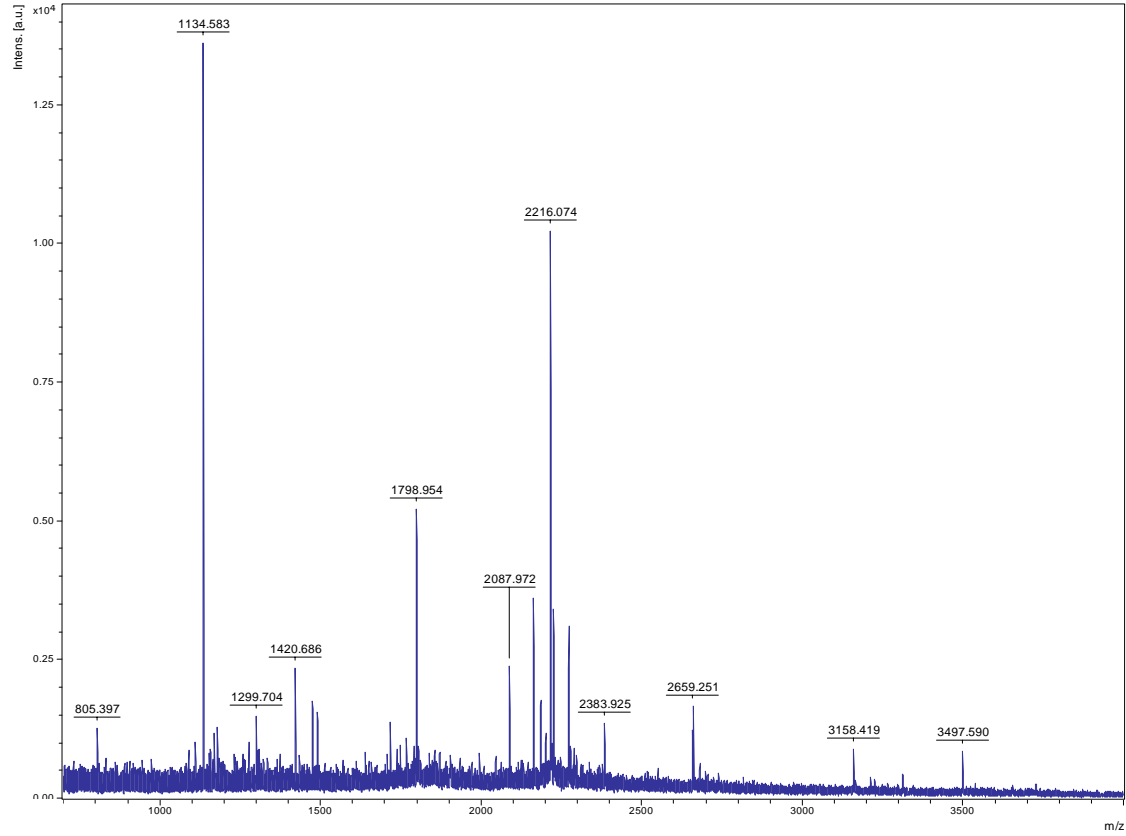

Match to: gi|50938957 Score: 80 Expect: 0.00061

Matched peptides:

| Start - End | Observed  | Mr (expt) | Mr (calc) | Delta   | Miss Sequence                                |
|-------------|-----------|-----------|-----------|---------|----------------------------------------------|
| 20 - 29     | 1134.5830 | 1133.5757 | 1133.5829 | -0.0072 | 0 K.TYPQQAGTIR.K                             |
| 59 - 70     | 1420.6862 | 1419.6789 | 1419.6969 | -0.0180 | 0 K.CHFVAIDIFNGK.K Carbamidomethyl (C)       |
| 71 - 89     | 2216.0737 | 2215.0665 | 2215.0804 | -0.0139 | 1 K.KLEDIVPSSHNCVPHVNR.T Carbamidomethyl (C) |
| 72 - 89     | 2087.9719 | 2086.9646 | 2086.9854 | -0.0207 | 0 K.LEDIVPSSHNCVPHVNR.T Carbamidomethyl (C)  |
| 90 - 113    | 2659.2512 | 2658.2439 | 2658.2912 | -0.0472 | 0 R.TEYQLIDISEDFVSLLETSGNTK.D                |
| 114 - 129   | 1798.9541 | 1797.9468 | 1797.9472 | -0.0004 | 1 K.DDLRLPTDSSLGQIK.T                        |
| 118 - 129   | 1299.7045 | 1298.6972 | 1298.7082 | -0.0110 | 0 R.LPTDSSLGQIK.T                            |

Spot 2338

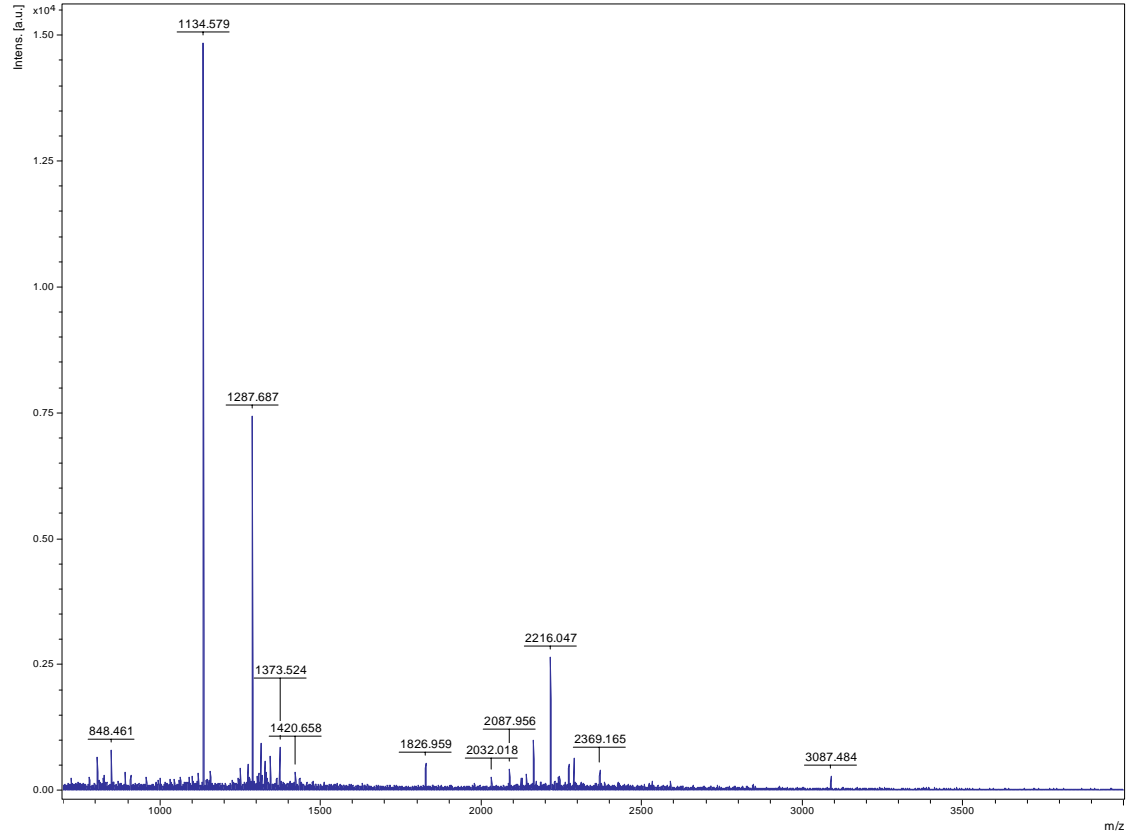

Match to: gi|20429034; Score: 135

Matched peptides:

| Start - End | Observed | Mr (expt) | Mr (calc) | Delta | Miss Sequence                   |
|-------------|----------|-----------|-----------|-------|---------------------------------|
| 20 - 29     | 1134.58  | 1133.58   | 1133.58   | -0.01 | 0 TYPQQAGTIR                    |
| 43 - 50     | 848.46   | 847.46    | 847.47    | -0.01 | 0 VVEVSTSK                      |
| 59 - 70     | 1420.66  | 1419.66   | 1419.70   | -0.04 | 0 CHFVAIDIFNGK                  |
| 71 - 89     | 2216.05  | 2215.04   | 2215.08   | -0.04 | 1 KLEDIVPSSHNCVPHVNR            |
| 72 - 89     | 2087.96  | 2086.95   | 2086.99   | -0.03 | 0 LEDIVPSSHNCVPHVNR             |
| 90 - 117    | 3087.48  | 3086.48   | 3086.49   | -0.01 | 1 TDYQLIDISEDGFVSLLETSGGTKDDLRL |
| 114 - 129   | 1826.96  | 1825.96   | 1825.98   | -0.02 | 1 DDLRLPSDEALLTQIK              |
| 118 - 129   | 1327.71  | 1326.71   | 1326.74   | -0.03 | 0 LPSDEALLTQIK                  |
| 118 - 136   | 2032.02  | 2031.02   | 2031.05   | -0.04 | 1 LPSDEALLTQIKDGF AEGK          |

## Spot 2341

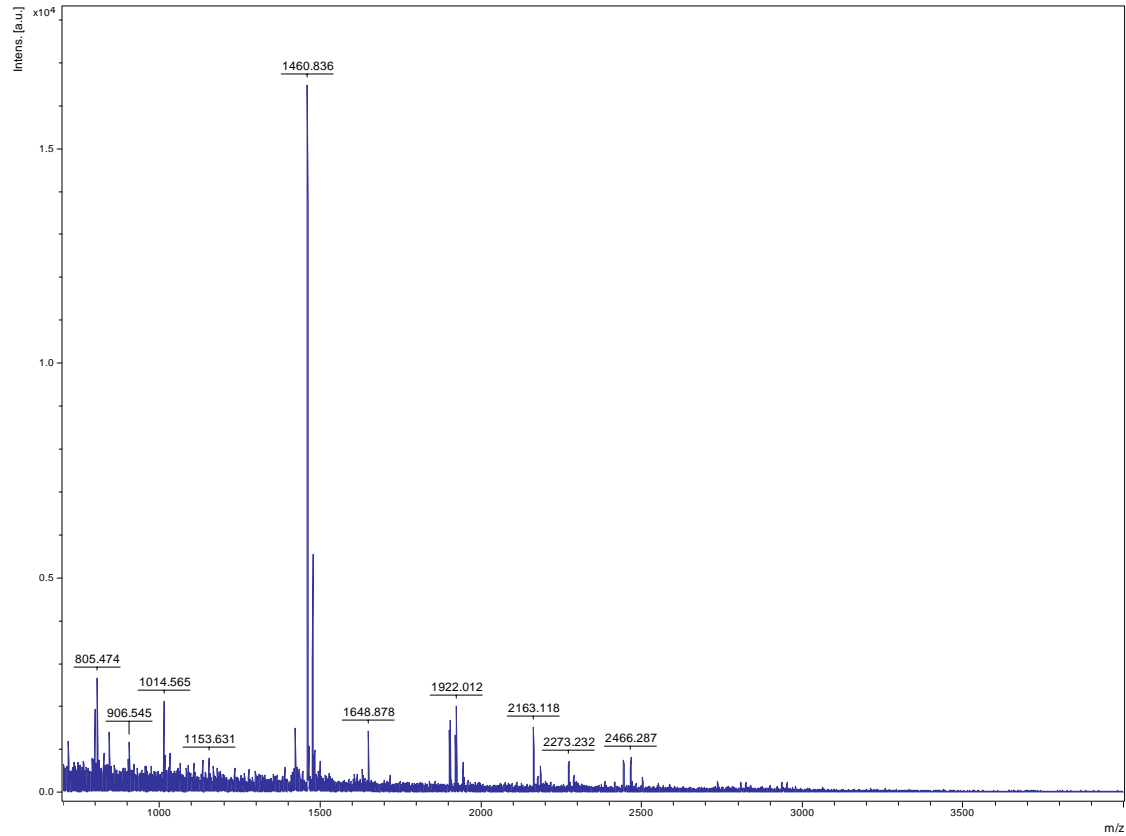

Match to: gi|37535166; Score: 91

### Matched peptides:

| Start - End | Observed | Mr (expt) | Mr (calc) | Delta | Miss Sequence             |
|-------------|----------|-----------|-----------|-------|---------------------------|
| 43 - 49     | 843.58   | 842.58    | 842.52    | 0.05  | 0 TLELVK                  |
| 50 - 64     | 1902.87  | 1901.87   | 1901.78   | 0.09  | 0 SYDGDHICYDHFVFR         |
| 75 - 88     | 1648.88  | 1647.88   | 1647.79   | 0.08  | 0 SLAEFFTFDFGYVPR         |
| 100 - 122   | 2466.29  | 2465.28   | 2465.20   | 0.08  | 0 ALWFSPPTNDGYTGTGVYGPLPR |
| 265 - 272   | 1014.56  | 1013.56   | 1013.48   | 0.08  | 0 SYIEFAER                |
| 280 - 291   | 1474.78  | 1473.78   | 1473.66   | 0.12  | 0 DLPNDEVNEHHR            |
| 280 - 292   | 1630.86  | 1629.86   | 1629.76   | 0.10  | 1 DLPNDEVNEHRR            |
| 293 - 314   | 2443.22  | 2442.22   | 2442.13   | 0.09  | 1 DGFVGNADKIFESTSNDQLTR   |

## Spot 2343

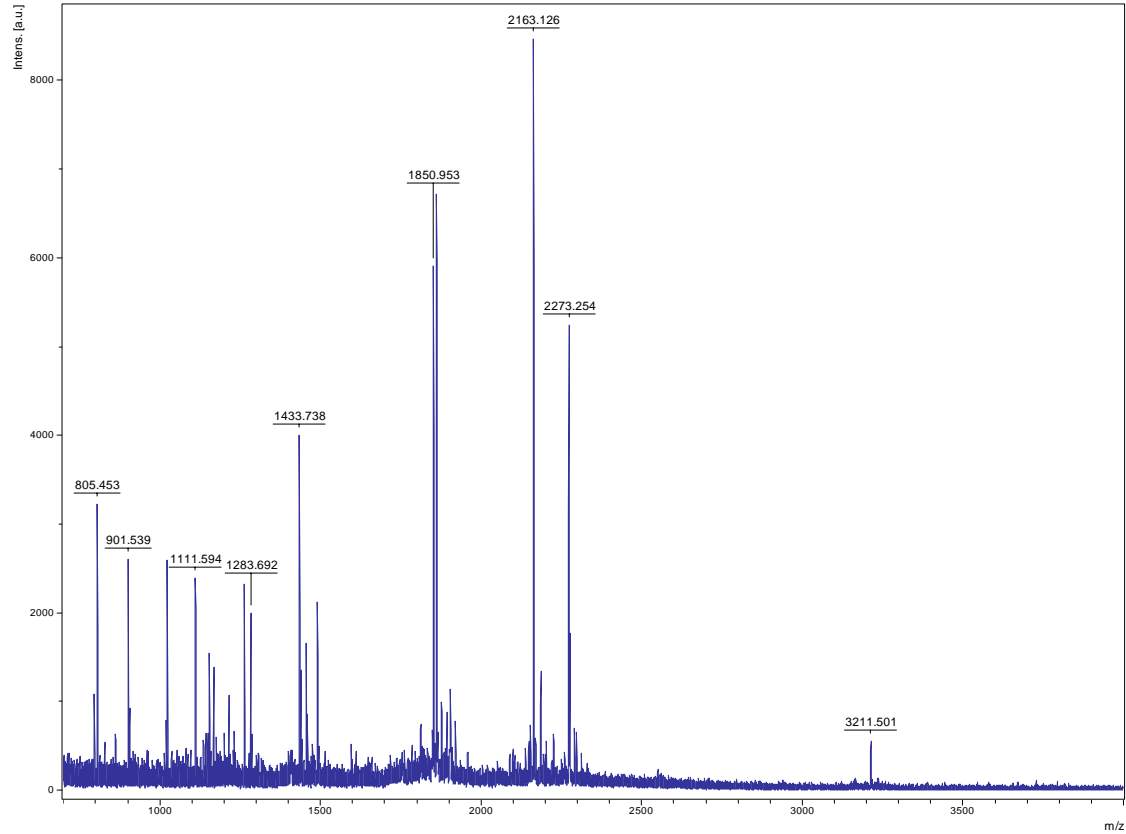

Match to: gi|77557031 Score: 107 Expect: 1.3e-06

### Matched peptides:

| Start - End | Observed  | Mr (expt) | Mr (calc) | Delta   | Miss Sequence |                                                         |
|-------------|-----------|-----------|-----------|---------|---------------|---------------------------------------------------------|
| 2 - 14      | 1283.7052 | 1282.6979 | 1282.6517 | 0.0463  | 0             | M.ASSGDPSAVVVR.N Acetyl (N-term)                        |
| 18 - 24     | 901.5040  | 900.4967  | 900.4916  | 0.0051  | 0             | R.LLEELER.G                                             |
| 18 - 27     | 1215.6925 | 1214.6852 | 1214.6506 | 0.0346  | 1             | R.LLEELERGEK.G                                          |
| 28 - 47     | 2136.8286 | 2135.8213 | 2135.8775 | -0.0562 | 0             | K.GIGDGSVSYGMDDADDIYMR.S                                |
| 28 - 47     | 2152.8815 | 2151.8742 | 2151.8724 | 0.0018  | 0             | K.GIGDGSVSYGMDDADDIYMR.S Oxidation (M)                  |
| 48 - 64     | 1861.9409 | 1860.9336 | 1860.9231 | 0.0106  | 0             | R.SWTGTIIGPHNTVHEGR.I                                   |
| 48 - 64     | 1903.9383 | 1902.9310 | 1902.9336 | -0.0026 | 0             | R.SWTGTIIGPHNTVHEGR.I Acetyl (N-term)                   |
| 70 - 84     | 1850.9058 | 1849.8985 | 1849.9032 | -0.0047 | 1             | K.LFCDKDYPRPPTVK.F Carbamidomethyl (C)                  |
| 89 - 104    | 1875.8950 | 1874.8877 | 1874.8614 | 0.0263  | 0             | R.INMTCVNPENGLVDQR.K Carbamidomethyl (C); Oxidation (M) |
| 106 - 113   | 1022.5559 | 1021.5486 | 1021.5345 | 0.0141  | 0             | K.FLLSNWR.R                                             |
| 115 - 126   | 1439.7649 | 1438.7576 | 1438.7377 | 0.0199  | 0             | R.EYTMEAILTLK.K                                         |
| 115 - 126   | 1455.7618 | 1454.7545 | 1454.7327 | 0.0219  | 0             | R.EYTMEAILTLK.K Oxidation (M)                           |
| 136 - 146   | 1262.7031 | 1261.6958 | 1261.6706 | 0.0252  | 1             | R.KLVQPPEGTF.F-                                         |

## Spot 2344

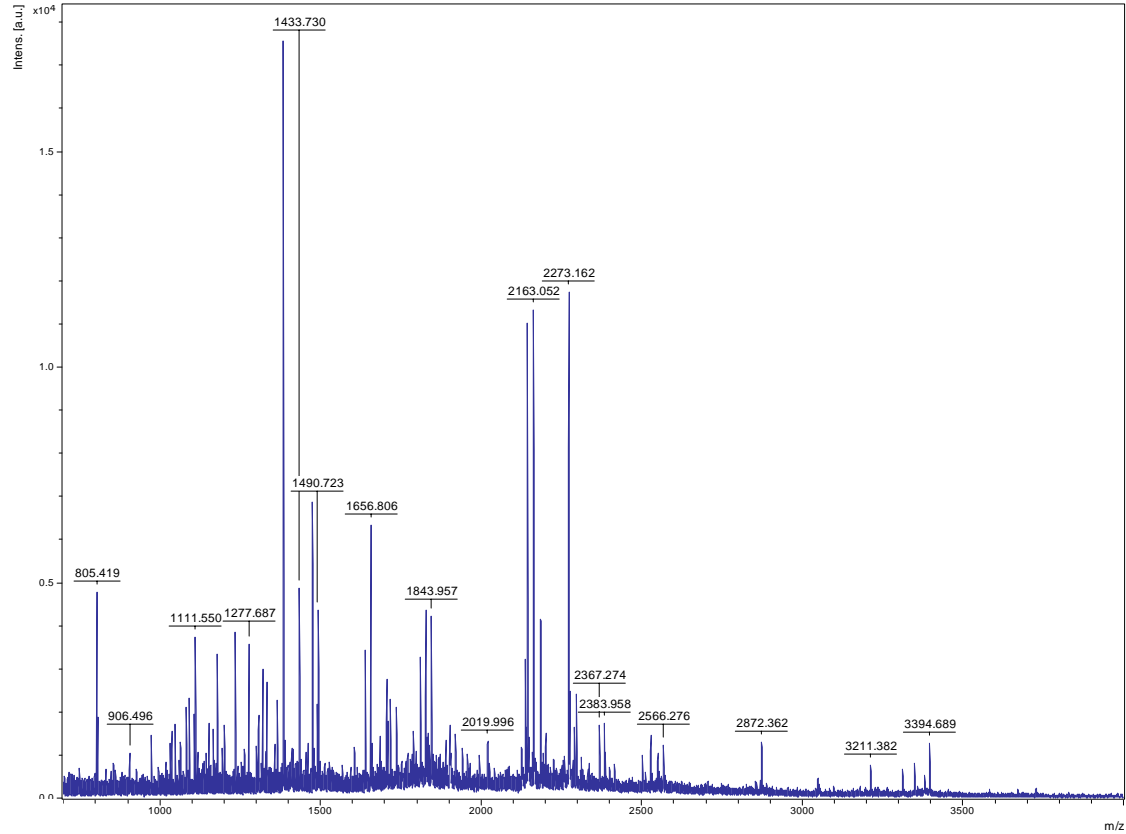

Match to: gi|51535721 Score: 82 Expect: 0.00043

### Matched peptides:

| Start - End | Observed  | Mr (expt) | Mr (calc) | Delta   | Miss Sequence                              |
|-------------|-----------|-----------|-----------|---------|--------------------------------------------|
| 40 - 49     | 1165.5744 | 1164.5671 | 1164.6549 | -0.0878 | 1 R.GRIAVMPHLR.A Oxidation (M)             |
| 106 - 122   | 1835.9920 | 1834.9847 | 1834.9651 | 0.0196  | 0 K.VVLFVPGAFPTCTQK.H Carbamidomethyl (C)  |
| 138 - 154   | 1809.8923 | 1808.8850 | 1808.8549 | 0.0302  | 0 K.GVDAVACVSNDAFVMR.A Carbamidomethyl (C) |
| 155 - 178   | 2528.2296 | 2527.2223 | 2527.2917 | -0.0694 | 1 R.AWKESLGVGDEVLLSDGNGELAR.A              |
| 158 - 178   | 2143.0606 | 2142.0533 | 2142.0803 | -0.0270 | 0 K.ESLGVGDEVLLSDGNGELAR.A                 |
| 179 - 196   | 1827.9956 | 1826.9883 | 1826.9559 | 0.0324  | 0 R.AMGVELDLSKPAAGLVGR.S                   |
| 179 - 196   | 1843.9786 | 1842.9713 | 1842.9509 | 0.0205  | 0 R.AMGVELDLSKPAAGLVGR.S Oxidation (M)     |
| 199 - 210   | 1333.7648 | 1332.7575 | 1332.7401 | 0.0174  | 1 R.RYALLAEDGVVK.V                         |
| 200 - 210   | 1177.6153 | 1176.6080 | 1176.6390 | -0.0310 | 0 R.YALLAEDGVVK.V                          |
| 211 - 230   | 2126.0377 | 2125.0304 | 2125.0248 | 0.0056  | 0 K.VLNLEEGGAFITSSAEMLK.A                  |



## Spot 2351

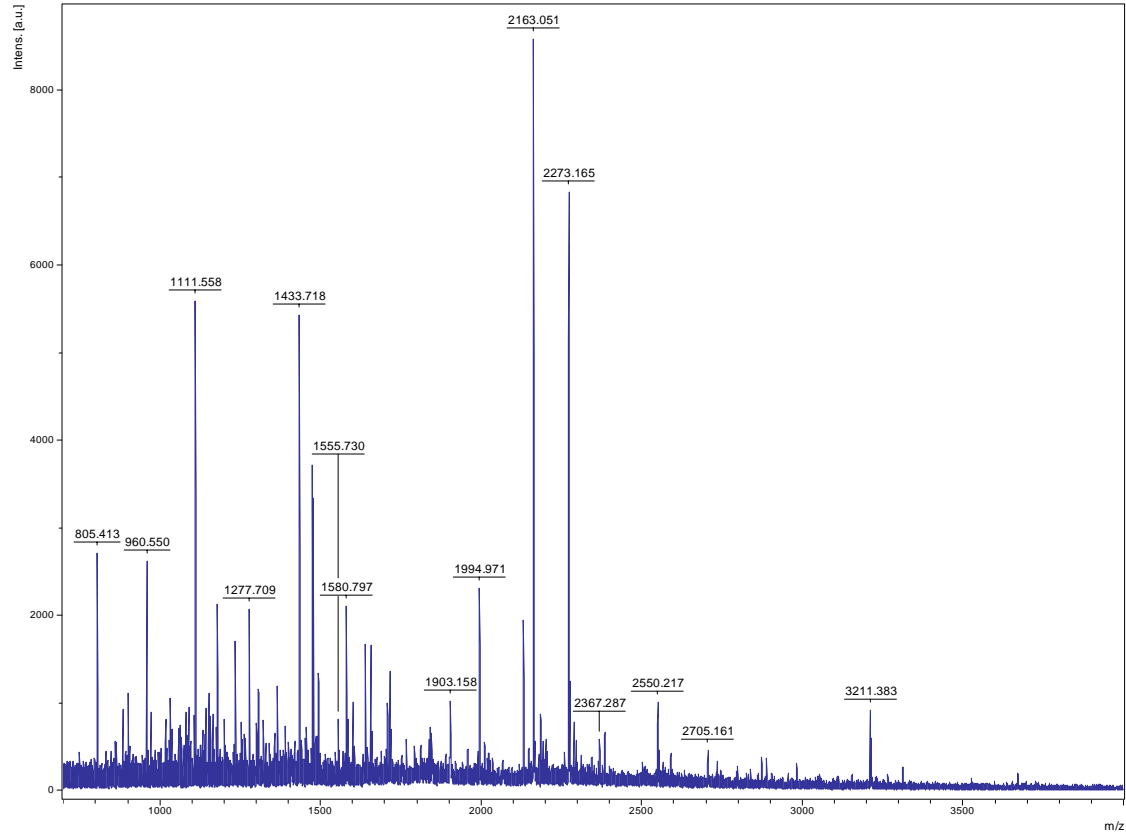

Match to: gj|18539471 Score: 68 Expect: 0.011

### Matched peptides:

| Start - End | Observed  | Mr (expt) | Mr (calc) | Delta   | Miss Sequence                           |
|-------------|-----------|-----------|-----------|---------|-----------------------------------------|
| 35 - 56     | 2131.0178 | 2130.0105 | 2130.0817 | -0.0712 | 0 K.IASHIVASHPVDGGVSGVSR.Q              |
| 57 - 70     | 1688.6033 | 1687.5960 | 1687.7486 | -0.1526 | 0 R.QFNFTSAMPFSHM.K.E Oxidation (M)     |
| 57 - 72     | 1957.9004 | 1956.8931 | 1956.8974 | -0.0043 | 1 R.QFNFTSAMPFSHM.KER.L                 |
| 71 - 80     | 1263.6297 | 1262.6224 | 1262.6506 | -0.0282 | 1 K.ERLEFLDVK.C                         |
| 73 - 84     | 1555.6031 | 1554.5958 | 1554.7058 | -0.1100 | 1 R.LEFLDVKCECK.S 2 Carbamidomethyl (C) |
| 85 - 95     | 1017.6062 | 1016.5989 | 1016.5502 | -0.0488 | 0 K.STLVEGGIG.K.A                       |
| 96 - 117    | 2179.1047 | 2178.0974 | 2178.1644 | -0.0669 | 1 K.AIETATSHKVEPAANGGSVVK.V             |
| 124 - 136   | 1440.7300 | 1439.7227 | 1439.8235 | -0.1008 | 1 K.LLPGVEVKDEITK.A                     |
| 137 - 146   | 1093.5823 | 1092.5750 | 1092.6179 | -0.0428 | 1 K.AKESLTGIFK.T                        |

### Spot 2354

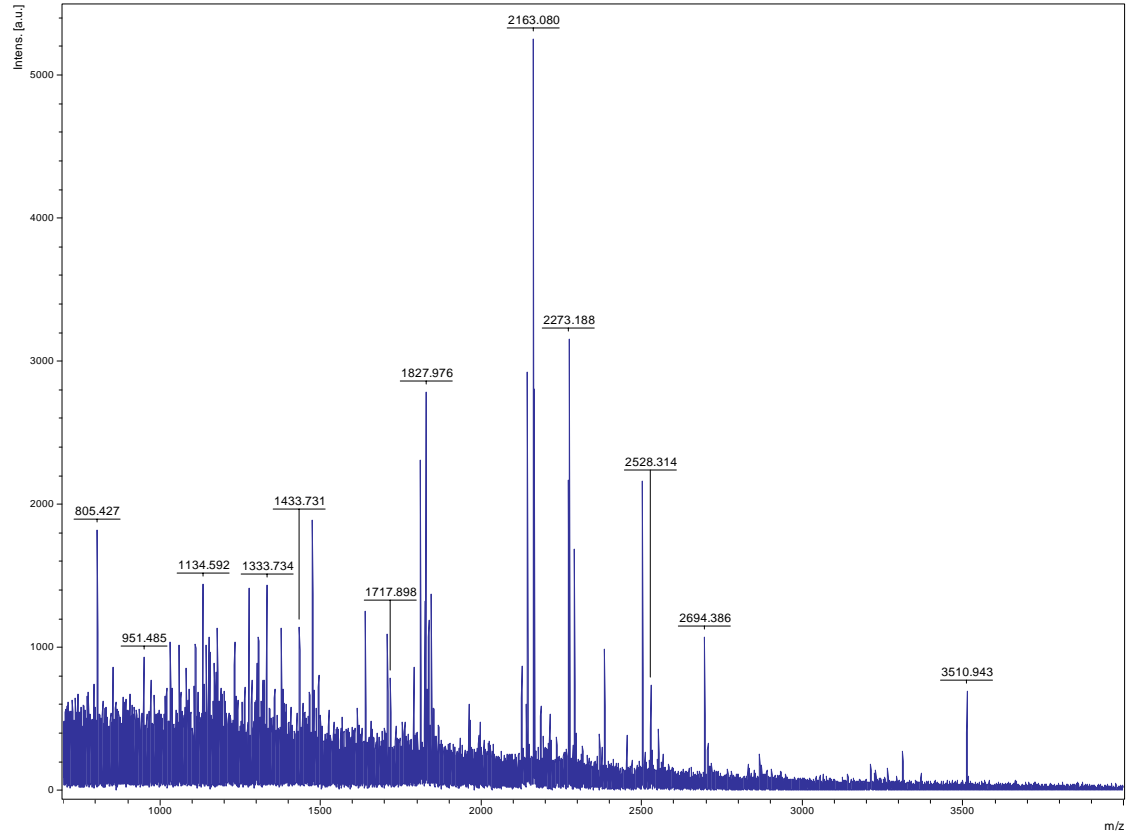

Match to: gi|51535721; Score: 102

#### Matched peptides:

| Start - End | Observed | Mr (expt) | Mr (calc) | Delta | Miss Sequence                       |
|-------------|----------|-----------|-----------|-------|-------------------------------------|
| 106 - 122   | 1835.98  | 1834.98   | 1834.97   | 0.01  | 0 VVLFVPGAFPTCTQK                   |
| 123 - 130   | 854.47   | 853.47    | 853.48    | -0.01 | 0 HVPGFVAK                          |
| 138 - 154   | 1809.89  | 1808.89   | 1808.85   | 0.03  | 0 GVDVAVACVSVNDAFVMR                |
| 138 - 154   | 1825.87  | 1824.87   | 1824.85   | 0.02  | 0 GVDVAVACVSVNDAFVMR Oxidation (M)  |
| 155 - 178   | 2528.31  | 2527.31   | 2527.29   | 0.02  | 1 AWKESLGVGDEVLLLSDGNELAR           |
| 158 - 178   | 2143.10  | 2142.10   | 2142.08   | 0.02  | 0 ESLGVGDEVLLLSDGNELAR              |
| 179 - 196   | 1827.98  | 1826.97   | 1826.96   | 0.02  | 0 AMGVVELDLSDKPAGLGVR               |
| 179 - 196   | 1843.97  | 1842.97   | 1842.95   | 0.02  | 0 AMGVVELDLSDKPAGLGVR Oxidation (M) |
| 199 - 210   | 1333.73  | 1332.73   | 1332.74   | -0.01 | 1 RYALLAEDGVVK                      |
| 211 - 230   | 2126.04  | 2125.04   | 2125.02   | 0.02  | 0 VLNLEEGGAFITSSAEMLK               |

### Spot 2355

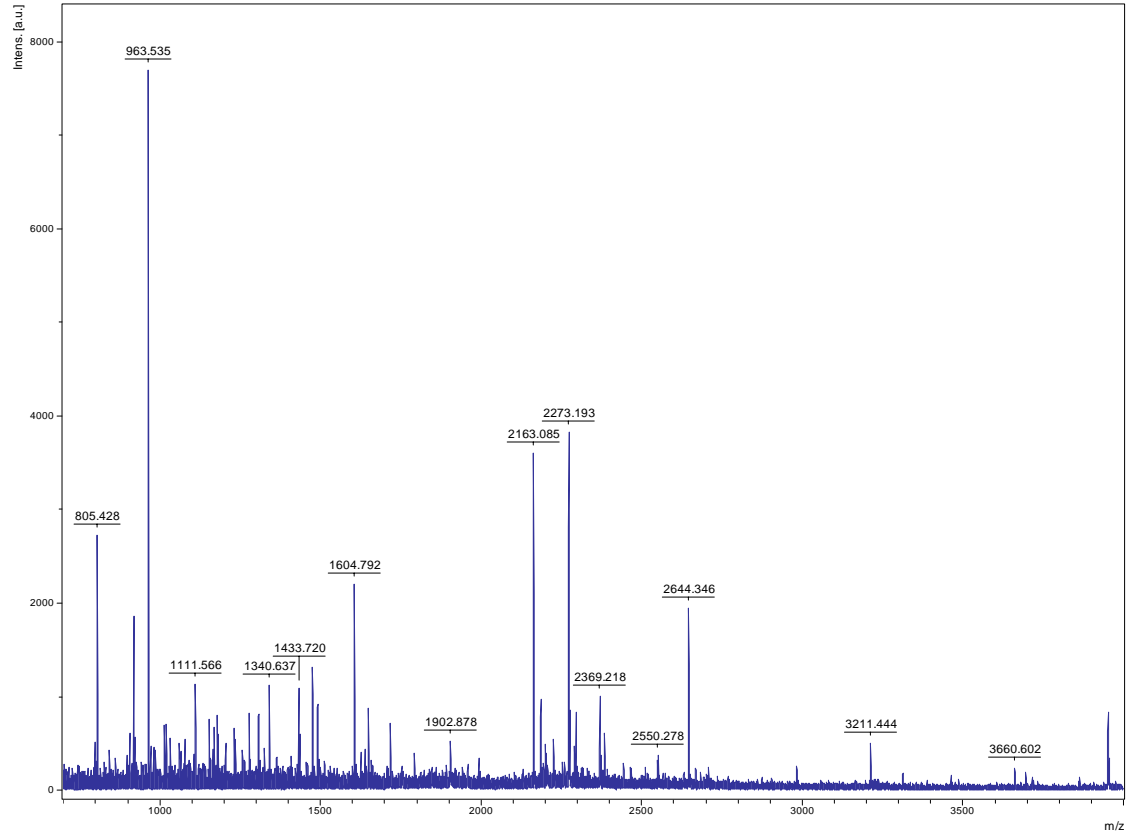

Match to: gi|50251353 Score: 83 Expect: 0.00031

#### Matched peptides:

| Start - End | Observed  | Mr (expt) | Mr (calc) | Delta   | Miss Sequence                                                 |
|-------------|-----------|-----------|-----------|---------|---------------------------------------------------------------|
| 39 - 49     | 1111.5617 | 1110.5544 | 1110.6298 | -0.0754 | 0 R.AIPVGAPHPPR.V                                             |
| 129 - 162   | 3950.6663 | 3949.6590 | 3949.8038 | -0.1448 | 1 K.YKDQGFELAFPCNQFGGQEPGTNNEIVQFACTR.F 2 Carbamidomethyl (C) |
| 131 - 162   | 3659.4581 | 3658.4508 | 3658.6456 | -0.1947 | 0 K.DQGFELAFPCNQFGGQEPGTNNEIVQFACTR.F 2 Carbamidomethyl (C)   |
| 165 - 185   | 2369.2037 | 2368.1964 | 2368.1586 | 0.0378  | 1 K.AEYPIFDKVDVNGDNTAPIYK.F                                   |
| 192 - 200   | 920.4437  | 919.4364  | 919.4763  | -0.0398 | 0 K.GGLFGDNK.W                                                |
| 206 - 213   | 963.4911  | 962.4838  | 962.5185  | -0.0347 | 1 K.FLVDKEGR.V                                                |
| 218 - 229   | 1340.6457 | 1339.6384 | 1339.6329 | 0.0055  | 0 R.YAPTTSPLSMEK.D Oxidation (M)                              |

### Spot 2361

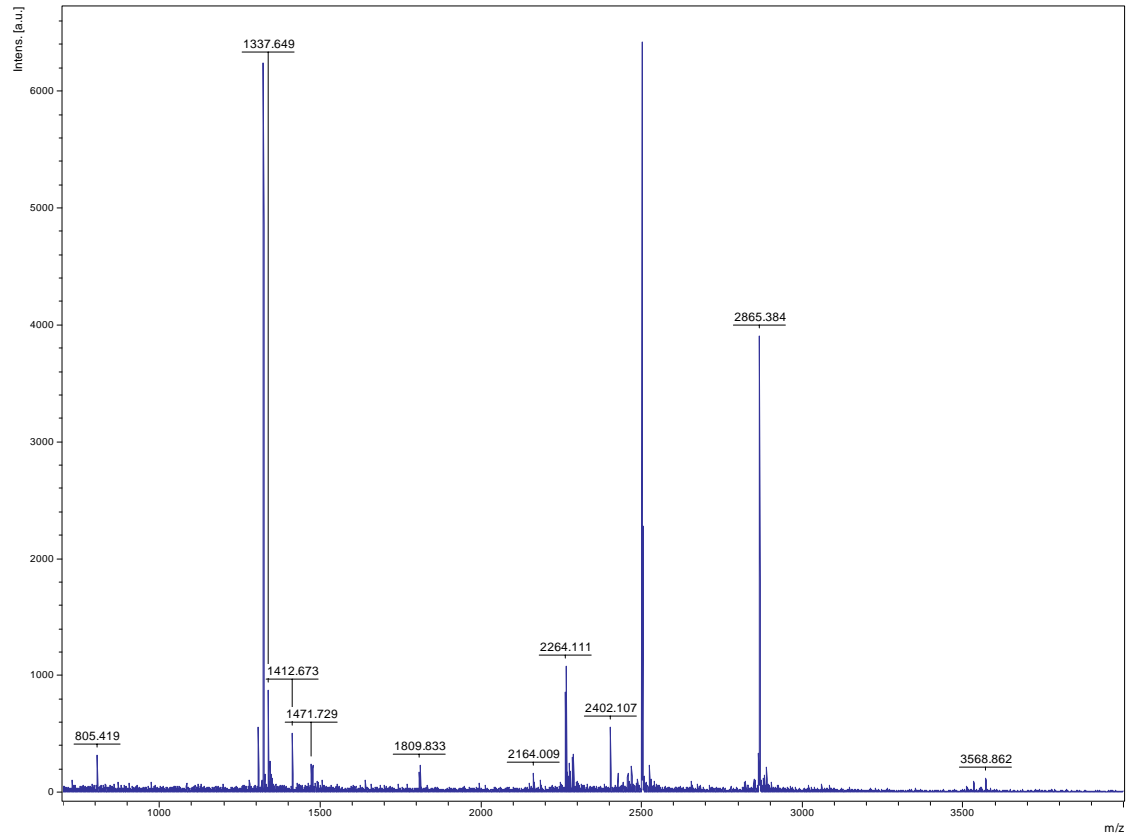

Match to: gi|50948527; Score: 89

#### Matched peptides:

| Start - End | Observed | Mr (expt) | Mr (calc) | Delta | Miss Sequence                          |
|-------------|----------|-----------|-----------|-------|----------------------------------------|
| 129 - 151   | 2264.11  | 2263.11   | 2263.14   | -0.04 | 0 HAGDLGNIVANAEGVAEATIVDK              |
| 129 - 164   | 3568.86  | 3567.86   | 3567.86   | -0.00 | 1 HAGDLGNIVANAEGVAEATIVDKQIPLSGPNSVVGR |
| 152 - 164   | 1306.70  | 1305.69   | 1305.70   | -0.01 | 0 QIPLSGPNSVVGR Pyro-glu (N-term Q)    |
| 165 - 177   | 1471.73  | 1470.73   | 1470.74   | -0.01 | 0 AFVVHELEDDLK                         |
| 165 - 192   | 2865.38  | 2864.38   | 2864.41   | -0.02 | 1 AFVVHELEDDLKGGHELSTGNAGGR            |
| 178 - 192   | 1412.67  | 1411.67   | 1411.68   | -0.01 | 0 GGHELSTGNAGGR                        |

# Spot 2364

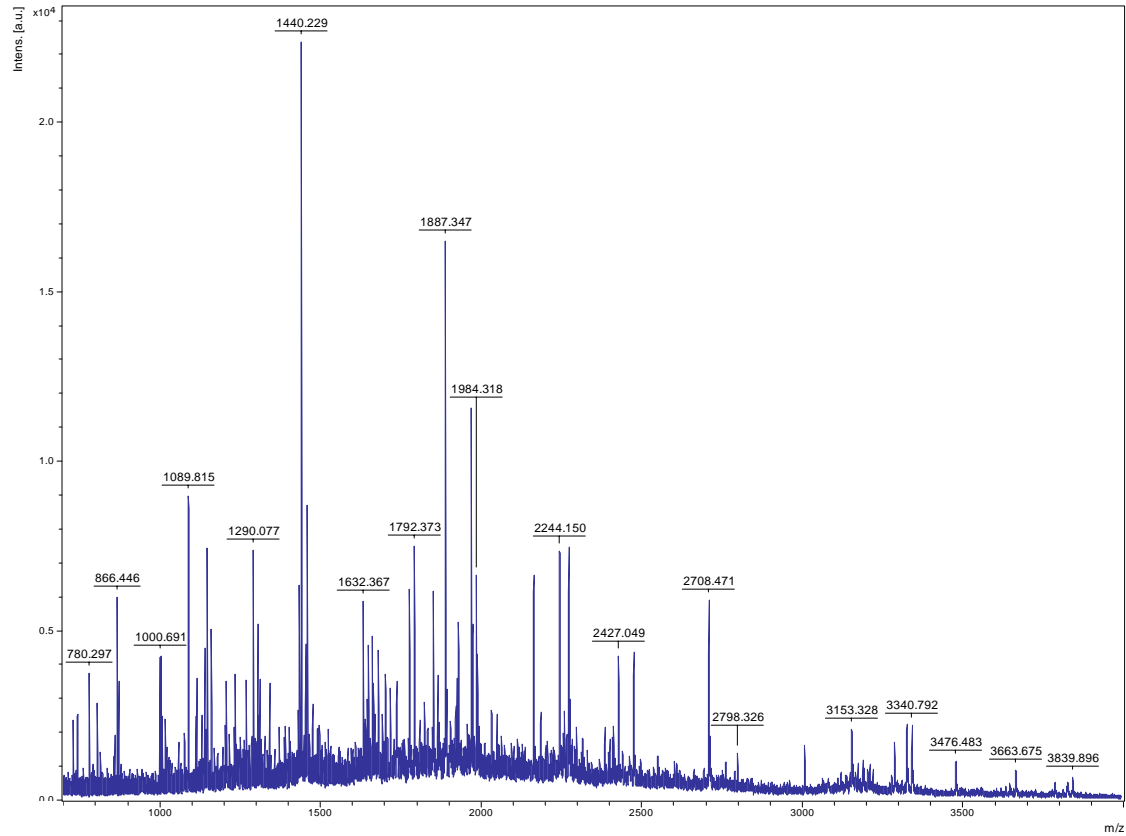

Match to: gi|51090590 Score: 100 Expect: 6.9e-06

## Matched peptides:

| Start - End | Observed  | Mr (expt) | Mr (calc) | Delta   | Miss Sequence                         |                                    |
|-------------|-----------|-----------|-----------|---------|---------------------------------------|------------------------------------|
| 2 - 32      | 3175.2464 | 3174.2391 | 3174.3969 | -0.1577 | 0 M.SSPPPPAAAAAMAVDDADDQLASMSTEDIVR.A | Acetyl (N-term); Oxidation (M)     |
| 2 - 32      | 3191.2760 | 3190.2687 | 3190.3918 | -0.1230 | 0 M.SSPPPPAAAAAMAVDDADDQLASMSTEDIVR.A | Acetyl (N-term); 2 Oxidation (M)   |
| 43 - 50     | 1000.5053 | 999.4980  | 999.5713  | -0.0732 | 1 R.VLKDELQRT                         |                                    |
| 120 - 134   | 1668.9603 | 1667.9530 | 1667.9498 | 0.0033  | 0 R.QTIPLPVIGLVDPEK.L                 |                                    |
| 135 - 145   | 1139.6502 | 1138.6429 | 1138.6709 | -0.0280 | 0 K.LKPGDLVGVNKK.D                    |                                    |
| 135 - 161   | 3007.5081 | 3006.5008 | 3006.5549 | -0.0541 | 1 K.LKPGDLVGVNKKDSYLILDTLPSEYDSRV     |                                    |
| 146 - 161   | 1886.8980 | 1885.8907 | 1885.8945 | -0.0038 | 0 K.DSYLILDTLPSEYDSRV                 |                                    |
| 184 - 199   | 1831.9275 | 1830.9202 | 1830.9913 | -0.0711 | 0 K.QIQELVEAIVLPMTHK.D                | Pyro-glu (N-term Q)                |
| 184 - 199   | 1848.9776 | 1847.9703 | 1848.0179 | -0.0475 | 0 K.QIQELVEAIVLPMTHK.D                |                                    |
| 184 - 199   | 1864.9932 | 1863.9859 | 1864.0128 | -0.0268 | 0 K.QIQELVEAIVLPMTHK.D                | Oxidation (M)                      |
| 184 - 201   | 2136.1137 | 2135.1064 | 2135.1408 | -0.0344 | 1 K.QIQELVEAIVLPMTHKDR.F              | Oxidation (M)                      |
| 205 - 223   | 1919.9654 | 1918.9581 | 1919.1356 | -0.1774 | 1 K.LGIRPPKGVLLYGPPTGK.T              |                                    |
| 212 - 223   | 1158.6166 | 1157.6093 | 1157.6444 | -0.0351 | 0 K.GVLLYGPPTGK.T                     |                                    |
| 241 - 256   | 1660.8513 | 1659.8440 | 1659.8654 | -0.0213 | 0 K.LAGPQLVQMFIGDGAK.L                | Oxidation (M)                      |
| 241 - 259   | 2055.0821 | 2054.0748 | 2054.1346 | -0.0597 | 1 K.LAGPQLVQMFIGDGAKLVR.D             | Acetyl (N-term)                    |
| 267 - 284   | 2049.0387 | 2048.0314 | 2048.0499 | -0.0185 | 1 K.EKSPCIFIDEIDAIGTK.R               | Carbamidomethyl (C)                |
| 299 - 315   | 1967.9360 | 1966.9287 | 1966.9306 | -0.0018 | 0 R.TMLELLNQLDGFSSDER.I               |                                    |
| 299 - 315   | 1983.9308 | 1982.9235 | 1982.9255 | -0.0020 | 0 R.TMLELLNQLDGFSSDER.I               | Oxidation (M)                      |
| 325 - 334   | 1114.5506 | 1113.5433 | 1113.5852 | -0.0419 | 0 R.ADILDPALMR.S                      |                                    |
| 325 - 334   | 1130.5777 | 1129.5704 | 1129.5801 | -0.0097 | 0 R.ADILDPALMR.S                      | Oxidation (M)                      |
| 341 - 352   | 1439.7230 | 1438.7157 | 1438.7204 | -0.0047 | 1 R.KIEFPHSEEAR.A                     |                                    |
| 342 - 352   | 1311.6133 | 1310.6060 | 1310.6255 | -0.0194 | 0 K.IEFPHSEEAR.A                      |                                    |
| 362 - 376   | 1775.8774 | 1774.8701 | 1774.8671 | 0.0030  | 1 R.KMNVNPDVNFELAR.S                  |                                    |
| 377 - 387   | 1195.5654 | 1194.5581 | 1194.5517 | 0.0065  | 0 R.STDDFNGAQLK.A                     |                                    |
| 377 - 399   | 2409.1457 | 2408.1384 | 2408.1827 | -0.0443 | 1 R.STDDFNGAQLKAVCVVEAGMLALR.R        |                                    |
| 388 - 399   | 1289.6446 | 1288.6373 | 1288.6631 | -0.0258 | 0 K.AVCVEAGMLALR.R                    | Carbamidomethyl (C)                |
| 388 - 399   | 1305.6668 | 1304.6595 | 1304.6580 | 0.0015  | 0 K.AVCVEAGMLALR.R                    | Carbamidomethyl (C); Oxidation (M) |
| 400 - 420   | 2400.1127 | 2399.1054 | 2399.1716 | -0.0662 | 1 R.RDATEVTHEDFNEGIIQVQAK.K           |                                    |
| 401 - 420   | 2244.0479 | 2243.0406 | 2243.0705 | -0.0299 | 0 R.RDATEVTHEDFNEGIIQVQAK.K           |                                    |

### Spot 2367

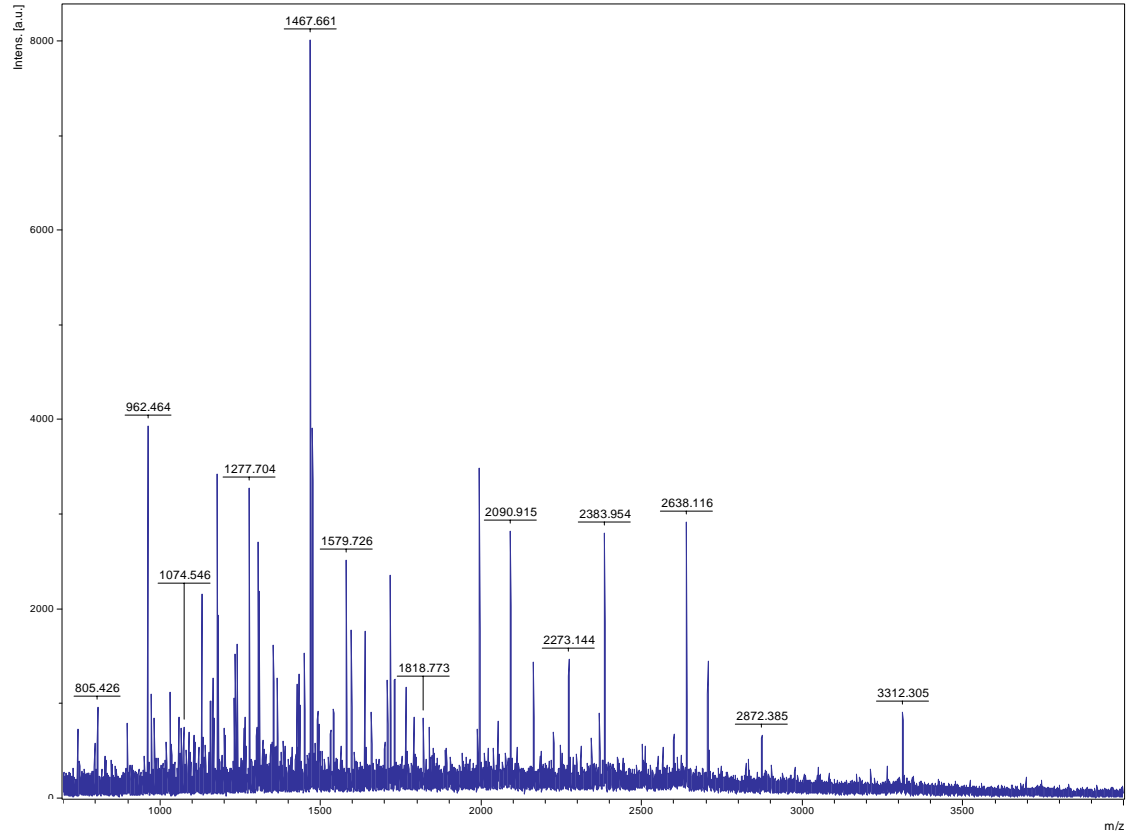

Match to: gi|50881454 Score: 69 Expect: 0.009

#### Matched peptides:

| Start - End | Observed  | Mr (expt) | Mr (calc) | Delta   | Miss Sequence                           |
|-------------|-----------|-----------|-----------|---------|-----------------------------------------|
| 2 - 9       | 962.4064  | 961.3991  | 961.4505  | -0.0513 | 0 M.AAPDVEYR.C Acetyl (N-term)          |
| 10 - 22     | 1467.6794 | 1466.6721 | 1466.6612 | 0.0109  | 0 R.CFVGGLAWATDDR.S Carbamidomethyl (C) |
| 23 - 38     | 1730.8578 | 1729.8505 | 1729.8410 | 0.0095  | 0 R.SLEAAFSTYGEILDSK.I                  |
| 39 - 47     | 1073.5377 | 1072.5304 | 1072.5625 | -0.0321 | 1 K.IINDRETGR.S                         |
| 50 - 63     | 1579.7414 | 1578.7341 | 1578.7136 | 0.0205  | 0 R.GFGFVTFSSSEQSMR.D                   |
| 50 - 63     | 1595.7362 | 1594.7289 | 1594.7085 | 0.0204  | 0 R.GFGFVTFSSSEQSMR.D Oxidation (M)     |
| 78 - 87     | 1131.5708 | 1130.5635 | 1130.5680 | -0.0044 | 0 R.NITVNEAQR.R                         |
| 149 - 161   | 1239.4954 | 1238.4881 | 1238.5064 | -0.0183 | 0 R.GGGYGGDSGGNWR.N                     |
| 149 - 162   | 1353.5745 | 1352.5672 | 1352.5493 | 0.0179  | 1 R.GGGYGGDSGGNWR.-                     |

### Spot 2368

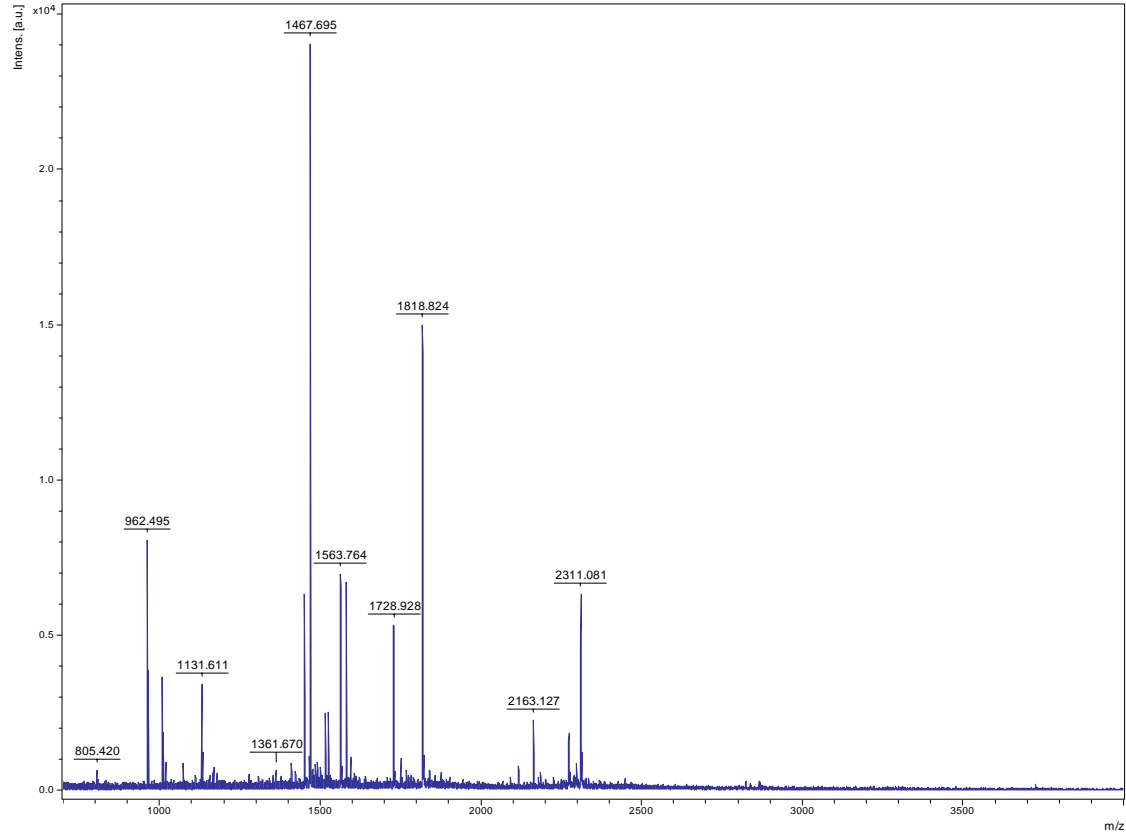

Match to: gi|2624326 Score: 67 Expect: 0.013

#### Matched peptides:

| Start - End | Observed  | Mr (expt) | Mr (calc) | Delta   | Miss Sequence                            |                     |
|-------------|-----------|-----------|-----------|---------|------------------------------------------|---------------------|
| 2 - 9       | 962.4329  | 961.4256  | 961.4505  | -0.0248 | 0 M.AAPDVEYR.C                           | Acetyl (N-term)     |
| 10 - 22     | 1410.6620 | 1409.6547 | 1409.6397 | 0.0150  | 0 R.CFVGGLAWATDDR.S                      |                     |
| 10 - 22     | 1467.6733 | 1466.6660 | 1466.6612 | 0.0048  | 0 R.CFVGGLAWATDDR.S                      | Carbamidomethyl (C) |
| 23 - 38     | 1728.8917 | 1727.8844 | 1727.8617 | 0.0227  | 0 R.SLEAAFSTFGEILES.KI                   |                     |
| 39 - 47     | 1073.5478 | 1072.5405 | 1072.5625 | -0.0220 | 1 K.IINDRETGR.S                          |                     |
| 50 - 63     | 1563.7430 | 1562.7357 | 1562.7187 | 0.0170  | 0 R.GFGFVTFSSSEQAMR.D                    |                     |
| 50 - 63     | 1579.7344 | 1578.7271 | 1578.7136 | 0.0135  | 0 R.GFGFVTFSSSEQAMR.D                    | Oxidation (M)       |
| 78 - 87     | 1131.5845 | 1130.5772 | 1130.5680 | 0.0093  | 0 R.NITVNEAQR.R                          |                     |
| 88 - 100    | 1165.5567 | 1164.5494 | 1164.5383 | 0.0111  | 1 R.RSGGGGGGGYGQR.G                      |                     |
| 89 - 100    | 1009.4170 | 1008.4097 | 1008.4372 | -0.0275 | 0 R.SGGGGGGGGYGQR.G                      |                     |
| 89 - 123    | 2824.0961 | 2823.0888 | 2823.1727 | -0.0839 | 1 R.SGGGGGGGGYGRGGGGGGGGGGGGGGGGGGYASR.E | Acetyl (N-term)     |
| 150 - 159   | 1019.4186 | 1018.4113 | 1018.4216 | -0.0103 | 0 R.GGNSDGNWR.N                          |                     |

### Spot 2373

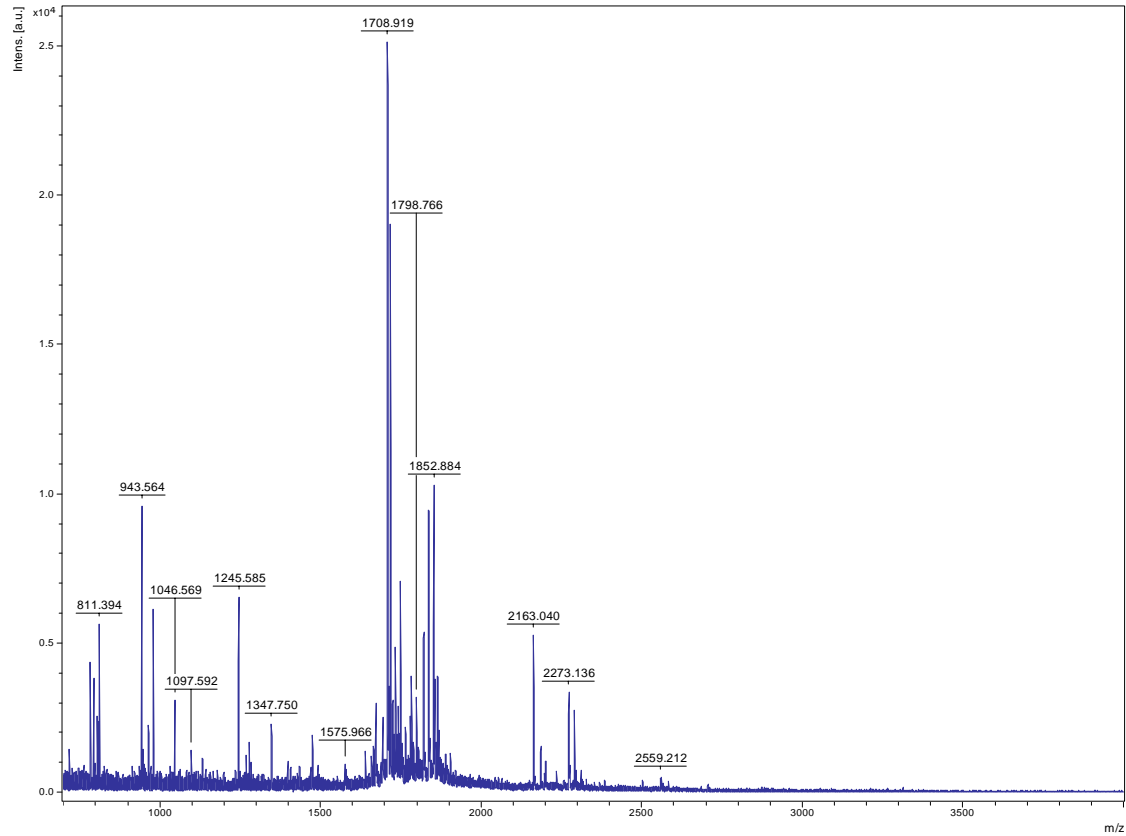

Match to: gi|50096951; Score: 73

#### Matched peptides:

| Start - End | Observed | Mr (expt) | Mr (calc) | Delta | Miss Sequence          |
|-------------|----------|-----------|-----------|-------|------------------------|
| 16 - 24     | 943.56   | 942.56    | 942.55    | 0.01  | 0 GLIGDIISR            |
| 16 - 27     | 1347.75  | 1346.75   | 1346.76   | -0.01 | 1 GLIGDIISRFEK         |
| 37 - 42     | 811.39   | 810.39    | 810.37    | 0.02  | 0 FMNVER Oxidation (M) |
| 86 - 102    | 1865.05  | 1864.05   | 1864.04   | 0.00  | 1 RIIGATRPWEAAPGTIR    |
| 87 - 102    | 1708.92  | 1707.92   | 1707.94   | -0.03 | 0 IIGATRPWEAAPGTIR     |
| 103 - 111   | 979.49   | 978.49    | 978.48    | 0.01  | 0 ADYAVEVGR            |
| 140 - 149   | 1245.59  | 1244.58   | 1244.58   | 0.00  | 0 SNLHPWIYES           |



### Spot 2379

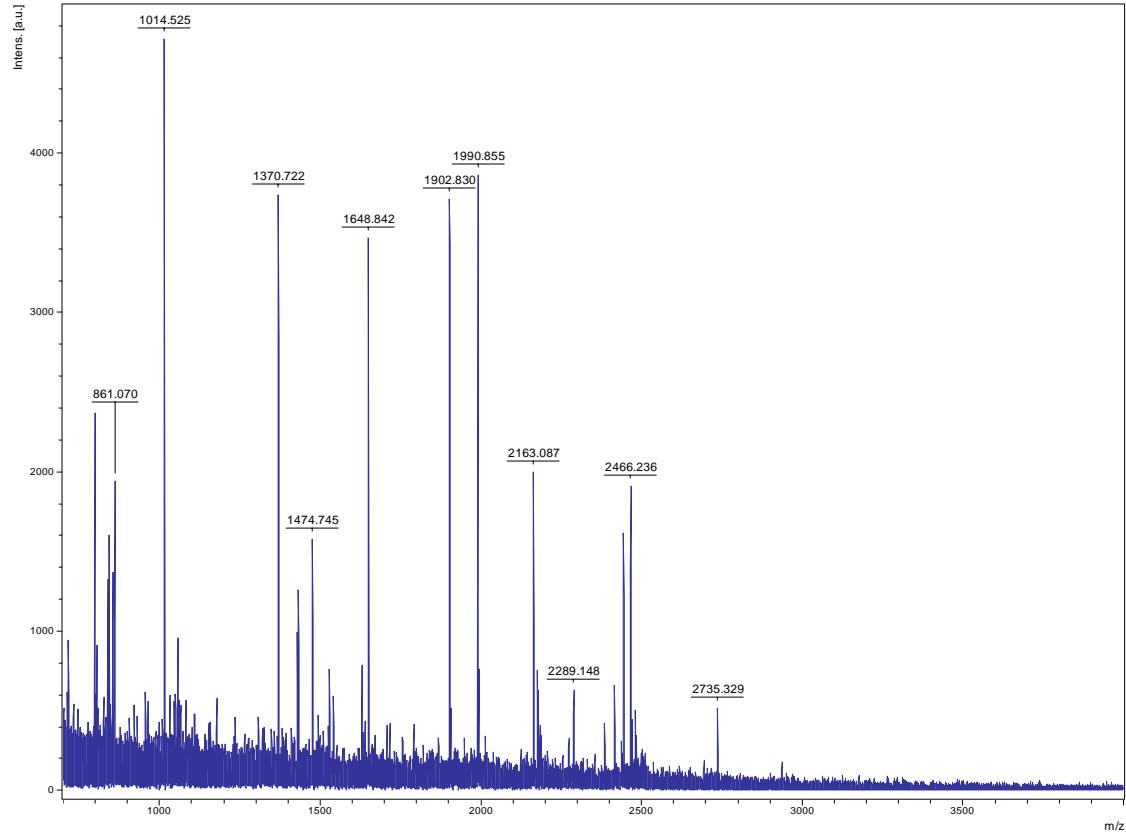

Match to: gi|37535166; Score: 178

#### Matched peptides:

| Start - End | Observed | Mr (expt) | Mr (calc) | Delta | Miss Sequence               |
|-------------|----------|-----------|-----------|-------|-----------------------------|
| 43 - 49     | 843.56   | 842.55    | 842.52    | 0.03  | 0 TLELVR                    |
| 50 - 64     | 1902.83  | 1901.83   | 1901.78   | 0.05  | 0 SYDGDHICYDHFAPR           |
| 65 - 74     | 1056.55  | 1055.55   | 1055.53   | 0.02  | 0 TFGVDGYGIK                |
| 75 - 88     | 1648.84  | 1647.84   | 1647.79   | 0.05  | 0 SLAEFFTFDGYVPR            |
| 75 - 92     | 2176.11  | 2175.11   | 2175.06   | 0.04  | 1 SLAEFFTFDGYVPRELR         |
| 98 - 122    | 2735.33  | 2734.33   | 2734.39   | -0.06 | 1 LRALWFSPPTNDGYTGTGVYGPLPR |
| 100 - 122   | 2466.24  | 2465.23   | 2465.20   | 0.03  | 0 ALWFSPPTNDGYTGTGVYGPLPR   |
| 123 - 143   | 2415.32  | 2414.32   | 2414.29   | 0.02  | 0 IFISELLVDELSPQSQDIQK      |
| 217 - 224   | 955.49   | 954.49    | 954.44    | 0.05  | 0 FVEDNGFK                  |
| 265 - 272   | 1014.52  | 1013.52   | 1013.48   | 0.04  | 0 SYIEFAER                  |
| 280 - 291   | 1474.74  | 1473.74   | 1473.66   | 0.08  | 0 DLPNDEVNEHHR              |
| 280 - 292   | 1630.80  | 1629.80   | 1629.76   | 0.03  | 1 DLPNDEVNEHRR              |
| 293 - 314   | 2443.18  | 2442.18   | 2442.13   | 0.05  | 1 DGFVEGNADKIFESTSNDQLTR    |

## Spot 2381

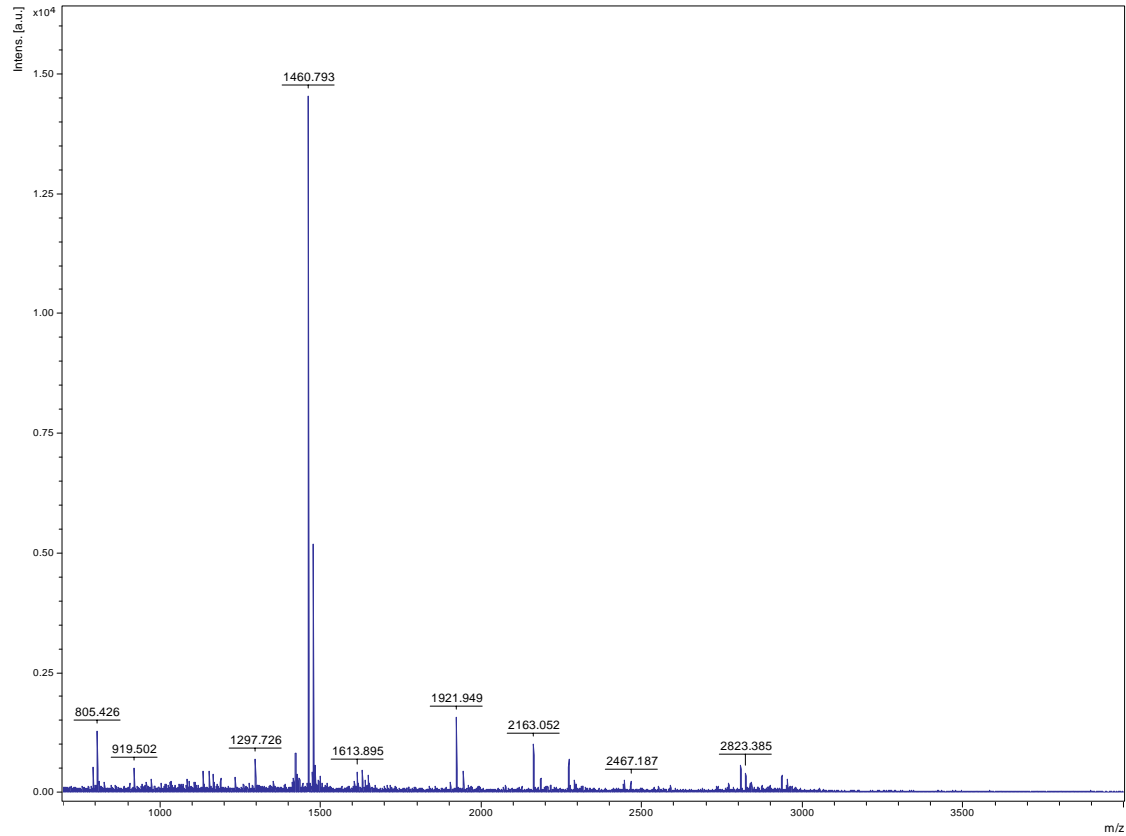

Match to: gi|55775452; Score: 77

### Matched peptides:

| Start - End | Observed | Mr (expt) | Mr (calc) | Delta | Miss Sequence                            |
|-------------|----------|-----------|-----------|-------|------------------------------------------|
| 53 - 71     | 1921.95  | 1920.95   | 1920.95   | 0.00  | DFDEPGSLAPTGLFLGGTK                      |
| 72 - 84     | 1460.79  | 1459.79   | 1459.79   | 0.00  | YMVIQGEPPGVIR                            |
| 72 - 84     | 1476.79  | 1475.79   | 1475.78   | 0.01  | YMVIQGEPPGVIR Oxidation (M)              |
| 88 - 96     | 919.50   | 918.50    | 918.50    | 0.00  | GTGGICVKK                                |
| 96 - 121    | 2935.47  | 2934.47   | 2934.47   | -0.00 | KTGLSLILGIYDEPMTPGQCNMIVER               |
| 96 - 121    | 2951.44  | 2950.43   | 2950.46   | -0.03 | KTGLSLILGIYDEPMTPGQCNMIVER Oxidation (M) |
| 97 - 121    | 2823.39  | 2822.38   | 2822.37   | 0.02  | TGLSLILGIYDEPMTPGQCNMIVER Oxidation (M)  |
| 122 - 131   | 1167.51  | 1166.51   | 1166.53   | -0.02 | LGDYLIQQC                                |

### Spot 2384

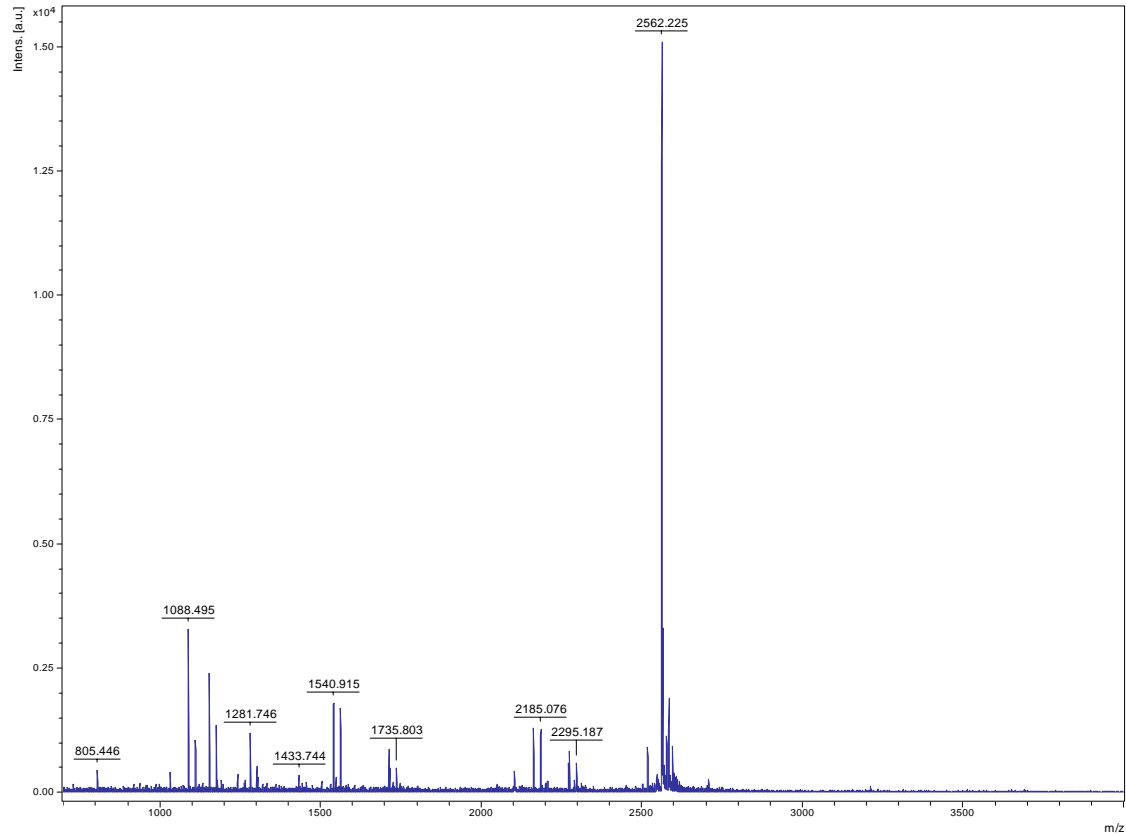

Match to: gi|55584168 Score: 85

#### Matched peptides:

| Start - End | Observed  | Mr (expt) | Mr (calc) | Delta  | Miss Sequence                        |
|-------------|-----------|-----------|-----------|--------|--------------------------------------|
| 6 - 20      | 1548.8784 | 1547.8711 | 1547.8558 | 0.0153 | 1 K.AKETVASAPVVVYSK.S                |
| 21 - 28     | 1031.4713 | 1030.4640 | 1030.4364 | 0.0276 | 0 K.SYCPFCVR.V Carbamidomethyl (C)   |
| 21 - 28     | 1088.4950 | 1087.4877 | 1087.4579 | 0.0298 | 0 K.SYCPFCVR.V 2 Carbamidomethyl (C) |
| 31 - 41     | 1281.7460 | 1280.7387 | 1280.7128 | 0.0259 | 1 K.KLFEQLGATFK.A                    |
| 32 - 41     | 1153.6469 | 1152.6396 | 1152.6179 | 0.0217 | 0 K.LFEQLGATFK.A                     |
| 42 - 65     | 2562.2251 | 2561.2178 | 2561.1881 | 0.0297 | 0 K.AIELDGESDGSSELQSALAEWTGQR.T      |
| 92 - 107    | 1540.9153 | 1539.9080 | 1539.8871 | 0.0209 | 0 K.LVPLLTEAGAIASSAK.T               |

Spot 2461

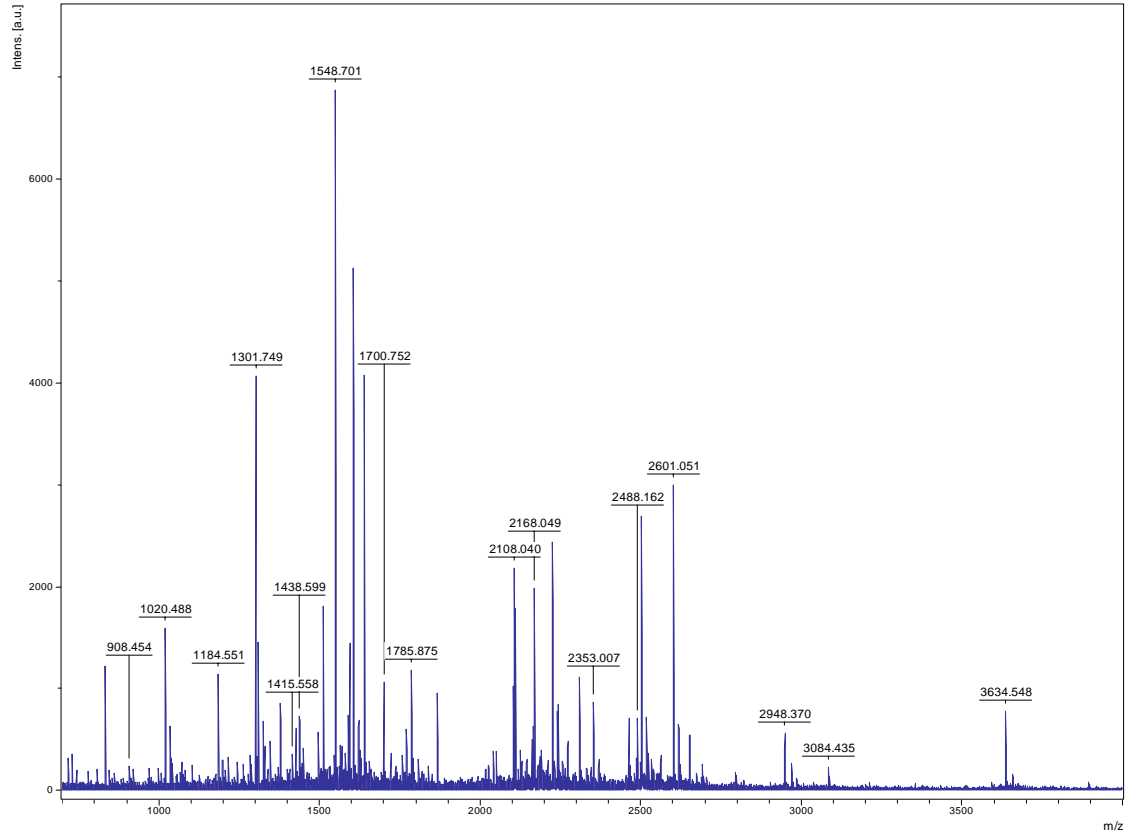

Match to: gi|13195430 Score: 321

Matched peptides:

| Start - End | Observed  | Mr (expt) | Mr (calc) | Delta   | Miss Sequence                                                |
|-------------|-----------|-----------|-----------|---------|--------------------------------------------------------------|
| 37 - 54     | 2106.9888 | 2105.9815 | 2106.0323 | -0.0508 | 0 K.HHAEFTPVFSPHFSPK.A                                       |
| 62 - 80     | 2353.0066 | 2351.9993 | 2352.0732 | -0.0739 | 0 K.SVLDLIMNWNATYDYDR.T                                      |
| 85 - 97     | 1588.7003 | 1587.6930 | 1587.7391 | -0.0461 | 0 K.QAYYLSMEFLQGR.A Pyro-glu (N-term Q)                      |
| 85 - 97     | 1605.7289 | 1604.7216 | 1604.7657 | -0.0440 | 0 K.QAYYLSMEFLQGR.A                                          |
| 85 - 97     | 1621.7211 | 1620.7138 | 1620.7606 | -0.0468 | 0 K.QAYYLSMEFLQGR.A Oxidation (M)                            |
| 143 - 164   | 2488.1619 | 2487.1546 | 2487.2256 | -0.0710 | 0 R.LASCFLDSLATLNYPAWGYGLR.Y Carbamidomethyl (C)             |
| 172 - 197   | 3084.4348 | 3083.4275 | 3083.5021 | -0.0746 | 1 K.QHTKDGQEEVAENWLEMGNPWEIVR.T                              |
| 177 - 197   | 2517.0654 | 2516.0582 | 2516.1277 | -0.0696 | 0 K.DGQEEVAENWLEMGNPWEIVR.T Oxidation (M)                    |
| 198 - 205   | 908.4542  | 907.4469  | 907.4651  | -0.0182 | 0 R.TDVSYPVK.F                                               |
| 218 - 227   | 1184.5507 | 1183.5434 | 1183.5808 | -0.0374 | 0 R.MHWIGGENIK.V                                             |
| 218 - 227   | 1200.5476 | 1199.5403 | 1199.5757 | -0.0354 | 0 R.MHWIGGENIK.V Oxidation (M)                               |
| 228 - 239   | 1308.7019 | 1307.6946 | 1307.7237 | -0.0291 | 0 K.VVAHDPIPGYK.T                                            |
| 299 - 316   | 2108.0400 | 2107.0328 | 2107.1095 | -0.0768 | 1 R.LKQQYTLCSASLQDIAR.F Carbamidomethyl (C)                  |
| 301 - 316   | 1866.8832 | 1865.8759 | 1865.9305 | -0.0546 | 0 K.QQYTLCSASLQDIAR.F Carbamidomethyl (C)                    |
| 320 - 333   | 1594.7045 | 1593.6972 | 1593.7423 | -0.0451 | 1 R.RAGDSLWEDFPSK.V                                          |
| 321 - 333   | 1438.5989 | 1437.5916 | 1437.6412 | -0.0496 | 0 R.AGDSLWEDFPSK.V                                           |
| 334 - 352   | 2168.0496 | 2167.0423 | 2167.0588 | -0.0165 | 0 K.VAVQMNDTHPTLCEPELMR.I                                    |
| 334 - 352   | 2241.0095 | 2240.0022 | 2240.0752 | -0.0729 | 0 K.VAVQMNDTHPTLCEPELMR.I Carbamidomethyl (C); Oxidation (M) |
| 388 - 395   | 1020.4877 | 1019.4804 | 1019.5110 | -0.0306 | 0 K.WSLDIMQK.L                                               |
| 388 - 395   | 1036.4835 | 1035.4762 | 1035.5059 | -0.0297 | 0 K.WSLDIMQK.L Oxidation (M)                                 |
| 407 - 418   | 1345.7050 | 1344.6977 | 1344.7322 | -0.0346 | 0 K.IDGELMNIISK.Y                                            |
| 436 - 448   | 1426.7238 | 1425.7165 | 1425.7715 | -0.0550 | 0 R.ILDNIDLPSIAK.L                                           |
| 471 - 481   | 1215.6161 | 1214.6088 | 1214.6394 | -0.0306 | 0 K.SLEPSVVEEK.T                                             |
| 583 - 594   | 1378.6548 | 1377.6475 | 1377.6962 | -0.0487 | 0 R.FCNPELSAISK.W Carbamidomethyl (C)                        |
| 595 - 607   | 1548.7009 | 1547.6937 | 1547.7256 | -0.0319 | 0 K.WIGSDDWVLTDK.L                                           |
| 595 - 612   | 2103.0129 | 2102.0057 | 2102.0684 | -0.0627 | 1 K.WIGSDDWVLTDKLAELK.K                                      |
| 614 - 625   | 1510.6050 | 1509.5977 | 1509.6372 | -0.0395 | 0 K.FADDEDLQSEWR.A                                           |
| 643 - 658   | 1769.8175 | 1768.8102 | 1768.8705 | -0.0603 | 0 K.TGYIVSPDAMFDVQVK.R                                       |
| 643 - 658   | 1785.8749 | 1784.8676 | 1784.8654 | 0.0022  | 0 K.TGYIVSPDAMFDVQVK.R Oxidation (M)                         |
| 666 - 676   | 1284.7318 | 1283.7245 | 1283.7601 | -0.0356 | 0 R.QLLNILGIVYR.Y Pyro-glu (N-term Q)                        |
| 666 - 676   | 1301.7491 | 1300.7419 | 1300.7867 | -0.0448 | 0 R.QLLNILGIVYR.Y                                            |
| 687 - 695   | 1103.5643 | 1102.5571 | 1102.5883 | -0.0312 | 1 K.DRINSFVPR.V                                              |
| 703 - 711   | 998.5068  | 997.4996  | 997.5232  | -0.0237 | 0 K.AFATYVQAK.R                                              |
| 795 - 816   | 2464.1106 | 2463.1033 | 2463.1705 | -0.0672 | 0 R.EEVGEENFFLPGAEAHEIAGLR.K                                 |
| 839 - 862   | 2601.0510 | 2600.0437 | 2600.1124 | -0.0687 | 0 R.SGVFGTYNYDDLMSLEGNEGYGR.A                                |
| 839 - 862   | 2617.0234 | 2616.0162 | 2616.1073 | -0.0912 | 0 R.SGVFGTYNYDDLMSLEGNEGYGR.A Oxidation (M)                  |
| 863 - 881   | 2309.0015 | 2307.9942 | 2308.0721 | -0.0779 | 1 R.ADYFLVGKDFPSYIECQEK.V Carbamidomethyl (C)                |
| 871 - 881   | 1415.5584 | 1414.5511 | 1414.6075 | -0.0564 | 0 K.DFPSYIECQEK.V Carbamidomethyl (C)                        |
| 871 - 884   | 1700.7524 | 1699.7452 | 1699.7763 | -0.0311 | 1 K.DFPSYIECQEKVDK.A                                         |

### Spot 2477

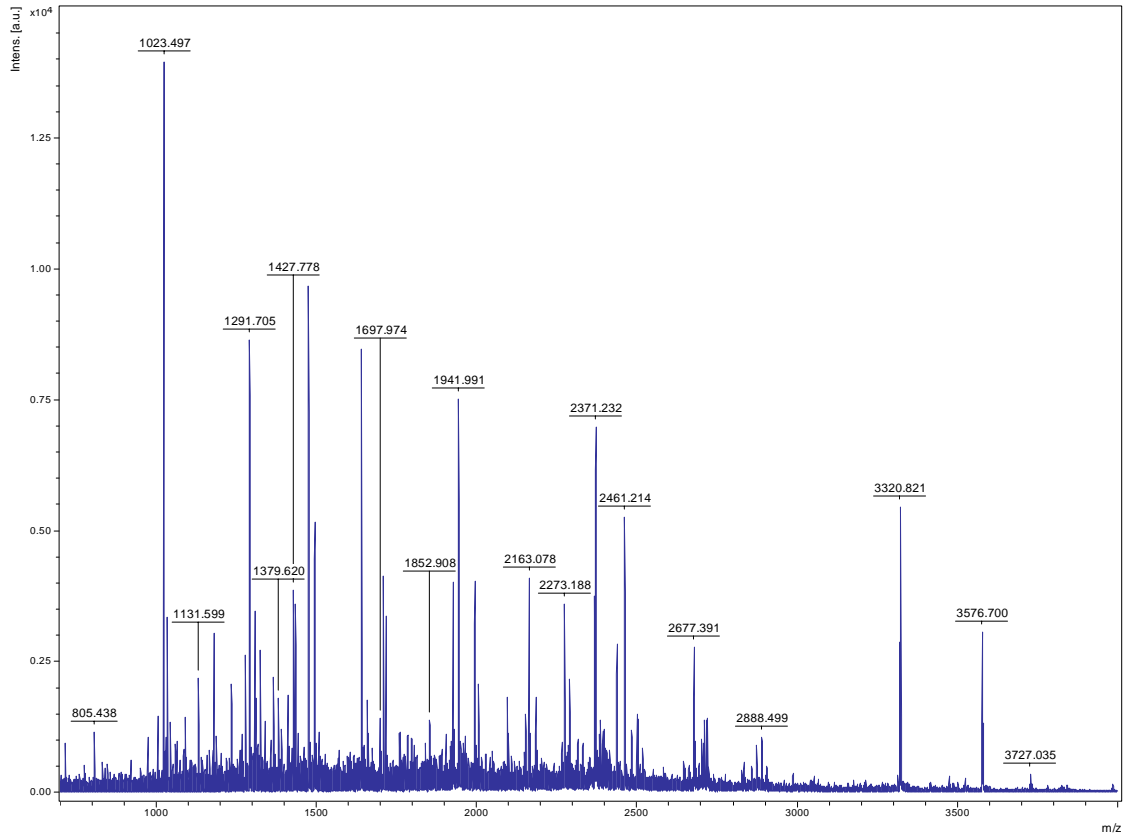

Match to: gi|38344900; Score: 150

#### Matched peptides:

| Start - End | Observed | Mr (expt) | Mr (calc) | Delta | Miss Sequence                           |
|-------------|----------|-----------|-----------|-------|-----------------------------------------|
| 133 - 143   | 1131.60  | 1130.60   | 1130.59   | 0.00  | 0 AIGEVVSTEAR                           |
| 171 - 184   | 1441.71  | 1440.71   | 1440.71   | -0.00 | 0 QQETPGEDPLLASK                        |
| 185 - 204   | 1941.99  | 1940.99   | 1940.95   | 0.04  | 0 YAVGYVTGLQDAGGGSDALK                  |
| 211 - 221   | 1411.63  | 1410.63   | 1410.62   | 0.01  | 0 HYTAYVDNWK                            |
| 211 - 225   | 1852.91  | 1851.91   | 1851.85   | 0.05  | 1 HYTAYVDNWKGVYR                        |
| 226 - 246   | 2461.21  | 2460.21   | 2460.15   | 0.06  | 0 YTFDAVVSQQLDLDDTFQPPFK                |
| 247 - 263   | 1903.86  | 1902.86   | 1902.83   | 0.03  | 0 SCVIDGNVASVMCSYNK                     |
| 320 - 342   | 2371.23  | 2370.23   | 2370.17   | 0.05  | 0 SGLDLNCGNFLAQHTVAAVQAGK               |
| 343 - 350   | 920.44   | 919.44    | 919.42    | 0.01  | 0 LSESDVDR                              |
| 351 - 361   | 1291.70  | 1290.70   | 1290.71   | -0.01 | 0 AITNNFVLMR                            |
| 362 - 370   | 1023.50  | 1022.49   | 1022.48   | 0.01  | 0 LGFFDGDPR                             |
| 371 - 380   | 1043.61  | 1042.61   | 1042.62   | -0.01 | 1 KLPPFGLGPK                            |
| 381 - 392   | 1379.62  | 1378.62   | 1378.61   | 0.00  | 0 DVCTSSNQELAR                          |
| 525 - 547   | 2367.29  | 2366.29   | 2366.22   | 0.07  | 1 GPVILVVMSSGPPDISFAKSSDK Oxidation (M) |
| 579 - 591   | 1494.77  | 1493.77   | 1493.76   | 0.02  | 0 LPVTWYPASFADK                         |
| 599 - 610   | 1339.62  | 1338.62   | 1338.60   | 0.02  | 0 MRPDSSTGYPGR Oxidation (M)            |
| 599 - 613   | 1759.92  | 1758.92   | 1758.81   | 0.11  | 1 MRPDSSTGYPGRTYR Oxidation (M)         |
| 614 - 631   | 2004.96  | 2003.96   | 2003.92   | 0.04  | 0 FYTGDTVYAFDGLSYTK                     |

### Spot 2483

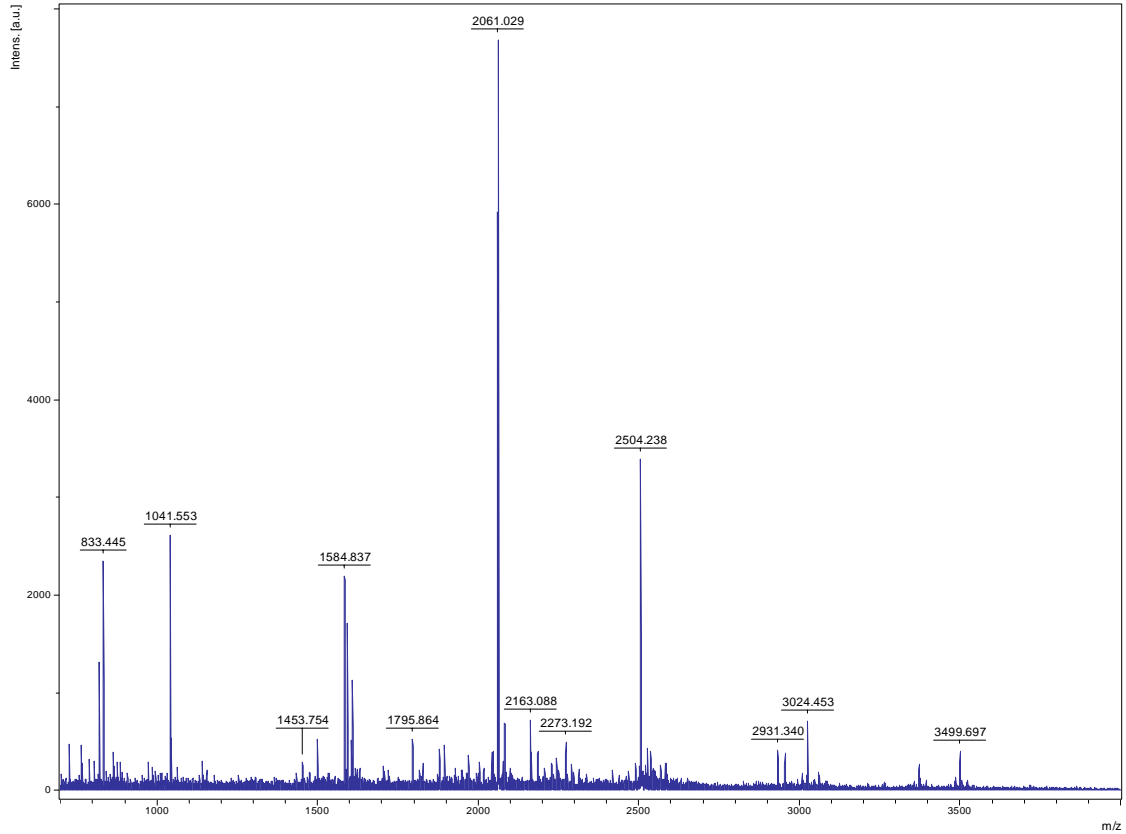

Match to: gi|77554103; Score: 132

#### Matched peptides:

| Start - End | Observed | Mr (expt) | Mr (calc) | Delta | Miss Sequence                    |
|-------------|----------|-----------|-----------|-------|----------------------------------|
| 86 - 104    | 2045.13  | 2044.13   | 2044.14   | -0.01 | 0 VVLAYSGGLDTSVIVPWLR            |
| 105 - 130   | 2931.34  | 2930.34   | 2930.29   | 0.04  | 0 ENYGCEVVCFTADVGGDIELEGLK       |
| 144 - 159   | 2061.03  | 2060.03   | 2059.99   | 0.03  | 1 DLKEEFVSEYIYPCLR               |
| 209 - 221   | 1584.84  | 1583.84   | 1583.82   | 0.01  | 0 FELTFYALNPELK                  |
| 228 - 242   | 1795.86  | 1794.86   | 1794.84   | 0.02  | 1 EWDITGREDAIEYAK                |
| 338 - 344   | 876.45   | 875.45    | 875.42    | 0.03  | 0 IDMVENR                        |
| 352 - 367   | 1592.83  | 1591.83   | 1591.80   | 0.03  | 0 GYYETPGGTIMAAAVR               |
| 352 - 367   | 1608.82  | 1607.82   | 1607.80   | 0.02  | 0 GYYETPGGTIMAAAVR Oxidation (M) |
| 368 - 382   | 1878.95  | 1877.95   | 1877.92   | 0.03  | 1 ELESLLDRETMQWK                 |
| 368 - 382   | 1894.93  | 1893.93   | 1893.91   | 0.02  | 1 ELESLLDRETMQWK Oxidation (M)   |
| 389 - 397   | 1041.55  | 1040.55   | 1040.53   | 0.02  | 0 YAEIVYAGR                      |
| 398 - 403   | 833.44   | 832.44    | 832.42    | 0.02  | 0 WFDPLR                         |
| 444 - 465   | 2504.24  | 2503.24   | 2503.11   | 0.12  | 0 EDISSFENGEIYNQADAEGFIR         |
| 466 - 472   | 819.48   | 818.47    | 818.46    | 0.01  | 0 LYGLPTR                        |

Spot 20d pick

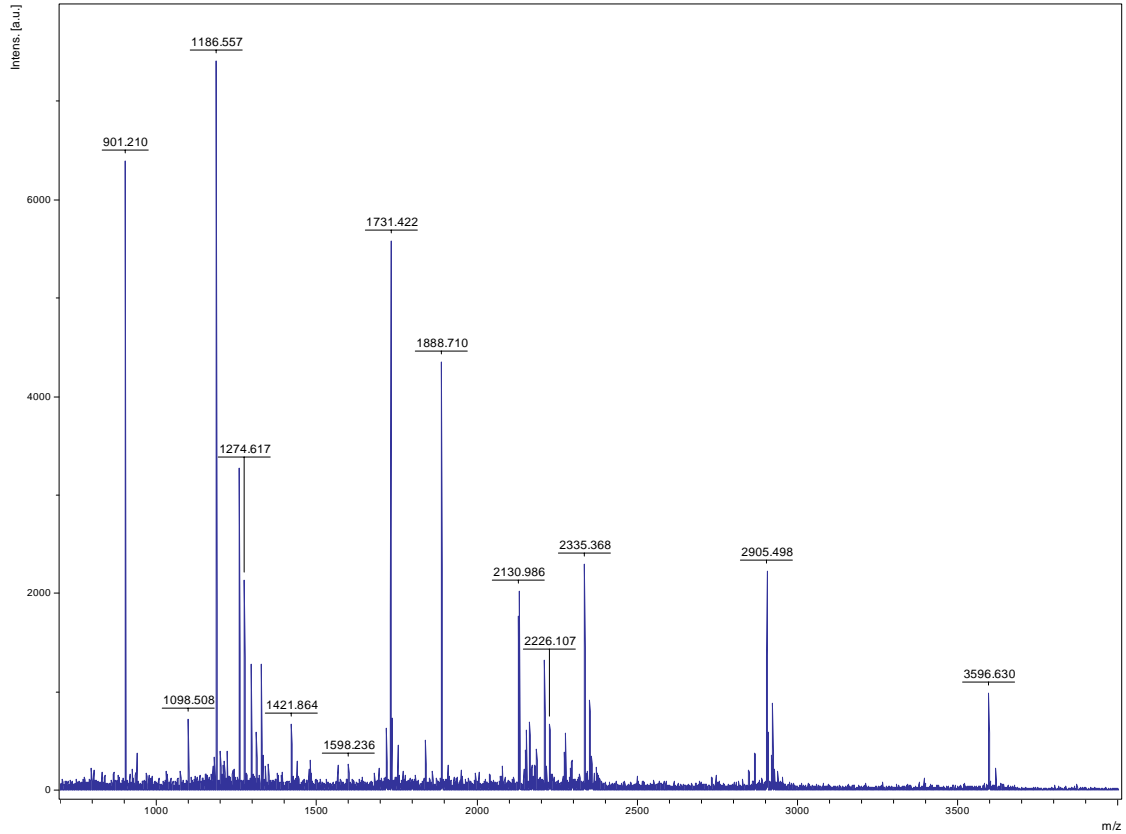

Match to: gi|6979321 Score: 109

Matched peptides:

| Start - End | Observed  | Mr (expt) | Mr (calc) | Delta   | Miss Sequence                |                                    |
|-------------|-----------|-----------|-----------|---------|------------------------------|------------------------------------|
| 37 - 55     | 2357.4236 | 2356.4163 | 2356.1925 | 0.2238  | 1 R.VKILFTSLCHTDVYFWEAK.G    | Carbamidomethyl (C)                |
| 56 - 63     | 901.2103  | 900.2031  | 900.4817  | -0.2787 | 0 K.GQTPVFP.R                |                                    |
| 105 - 115   | 1295.6360 | 1294.6287 | 1294.5645 | 0.0642  | 0 K.SAESNMCDLLR.I            | Carbamidomethyl (C)                |
| 105 - 115   | 1311.6370 | 1310.6297 | 1310.5595 | 0.0702  | 0 K.SAESNMCDLLR.I            | Carbamidomethyl (C); Oxidation (M) |
| 161 - 169   | 938.2363  | 937.2290  | 937.5233  | -0.2943 | 0 K.INPAAPLDK.V              |                                    |
| 170 - 191   | 2130.9858 | 2129.9786 | 2130.1540 | -0.1754 | 0 K.VCVLSCGISTGLGATINVAKPK.G |                                    |
| 219 - 228   | 1098.5083 | 1097.5010 | 1097.6193 | -0.1182 | 0 R.IIGIDLNAN.R              |                                    |
| 234 - 244   | 1326.7611 | 1325.7538 | 1325.6438 | -0.1101 | 1 R.KFGCTEFVNP.K.D           | Carbamidomethyl (C)                |
| 235 - 244   | 1198.5245 | 1197.5173 | 1197.5488 | -0.0315 | 0 K.FGCTEFVNP.K.D            | Carbamidomethyl (C)                |
| 303 - 312   | 1258.6267 | 1257.6194 | 1257.5924 | 0.0270  | 0 K.THPMNFNER.T              |                                    |
| 303 - 312   | 1274.6171 | 1273.6098 | 1273.5873 | 0.0225  | 0 K.THPMNFNER.T              | Oxidation (M)                      |
| 316 - 325   | 1186.5570 | 1185.5497 | 1185.5930 | -0.0433 | 0 K.GTTFGNKPR.T              |                                    |
| 326 - 337   | 1421.8635 | 1420.8562 | 1420.7272 | 0.1291  | 0 R.TDLPNVVELYMK.K           |                                    |
| 326 - 337   | 1437.9139 | 1436.9067 | 1436.7221 | 0.1846  | 0 R.TDLPNVVELYMK.K           | Oxidation (M)                      |

6d12

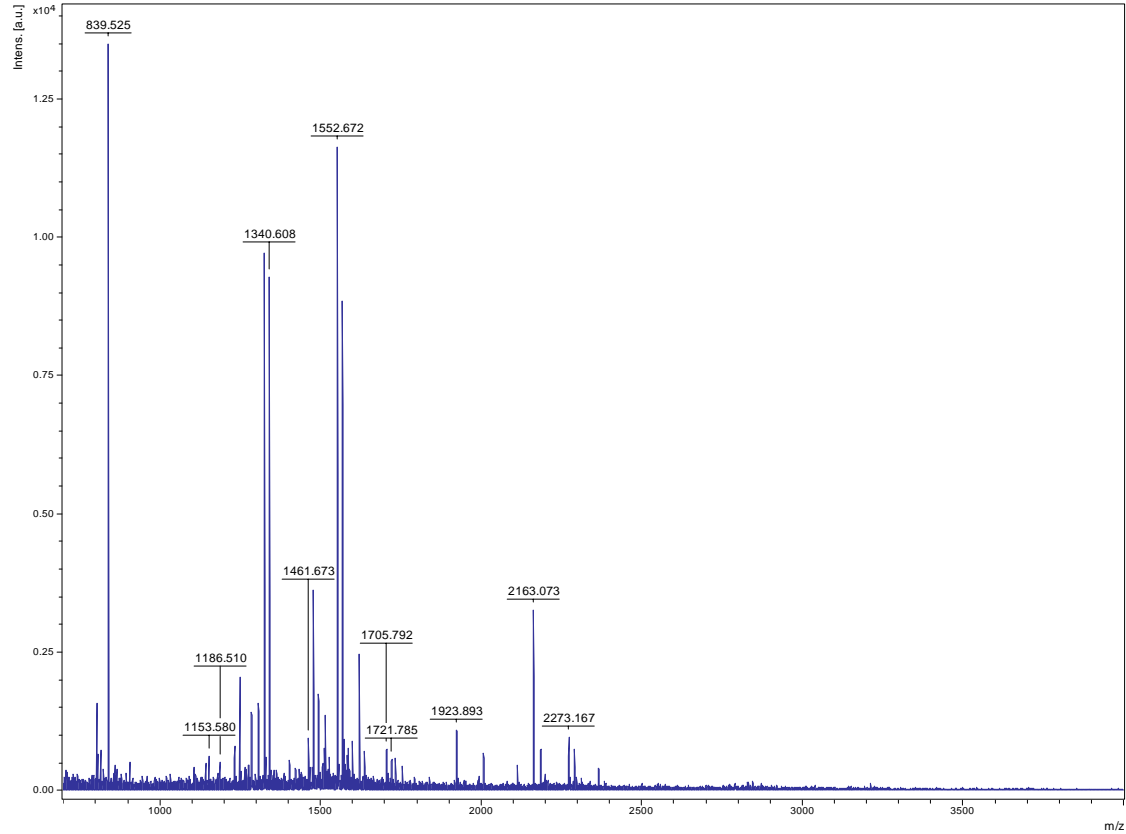

Match to: gi|51964662; Score: 95

Matched peptides:

| Start - End | Observed | Mr (expt) | Mr (calc) | Delta | Miss Sequence              |
|-------------|----------|-----------|-----------|-------|----------------------------|
| 18 - 39     | 2366.15  | 2365.15   | 2365.12   | 0.03  | 0 GFGFITPDDGGEDLFVHQSSLK   |
| 45 - 63     | 1923.89  | 1922.89   | 1922.86   | 0.03  | 0 SLNDGDVVVEFVSGSGNDGR     |
| 66 - 89     | 2112.07  | 2111.07   | 2111.04   | 0.03  | 0 AVDVTAPGGGALTGGSRPSGGGDR |
| 105 - 118   | 1186.51  | 1185.51   | 1185.48   | 0.03  | 0 GYGGGGGYGGGGGDR          |
| 119 - 135   | 1329.57  | 1328.57   | 1328.55   | 0.02  | 0 GYGGGGGYGGGGGGSR         |
| 136 - 148   | 1568.68  | 1567.67   | 1567.63   | 0.04  | 1 ACYKCGEEGHMAR            |
| 149 - 168   | 1732.70  | 1731.70   | 1731.67   | 0.03  | 0 DCSQGGGGGGYGGGGGYR       |
| 169 - 190   | 2007.84  | 2006.83   | 2006.81   | 0.03  | 0 GGGGGGGGCYNCGETGHAR      |



## Spot 6d15

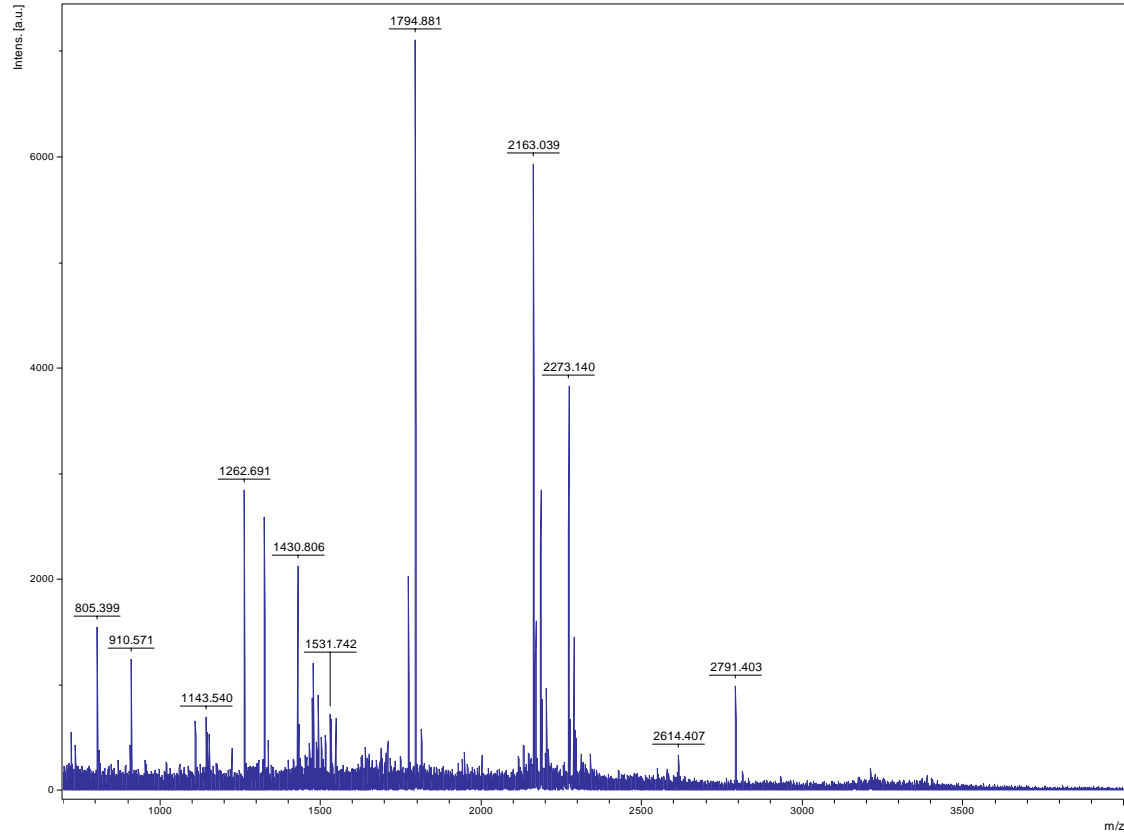

Match to: Q8GVQ3\_ORYSA Score: 122 Expect: 4.2e-08

### Matched peptides:

| Start - End | Observed  | Mr (expt) | Mr (calc) | Delta   | Miss Sequence                               |
|-------------|-----------|-----------|-----------|---------|---------------------------------------------|
| 57 - 67     | 1262.6914 | 1261.6841 | 1261.7030 | -0.0189 | 1 R.FSPIKESIVSR.E                           |
| 136 - 159   | 2791.4036 | 2790.3963 | 2790.4115 | -0.0152 | 0 R.KPAHLFLDELGVAYDEQEDYVVIK.H              |
| 160 - 171   | 1336.6368 | 1335.6296 | 1335.6605 | -0.0309 | 0 K.HAALFTSTVMSR.L Oxidation (M)            |
| 172 - 179   | 910.5715  | 909.5642  | 909.5759  | -0.0117 | 0 R.LLARPNVK.L                              |
| 180 - 192   | 1430.8058 | 1429.7985 | 1429.8180 | -0.0195 | 0 K.LFNVAIVEDLIVK.E                         |
| 225 - 242   | 1773.8628 | 1772.8555 | 1772.8515 | -0.0040 | 0 R.VVVSCHGHDGPFATGVK.R Carbamidomethyl (C) |
| 244 - 257   | 1515.7468 | 1514.7396 | 1514.7585 | -0.0189 | 0 R.LQDIGMIDAVPGMR.A                        |
| 244 - 257   | 1531.7419 | 1530.7347 | 1530.7534 | -0.0187 | 0 R.LQDIGMIDAVPGMR.A Oxidation (M)          |
| 244 - 257   | 1547.7393 | 1546.7320 | 1546.7483 | -0.0163 | 0 R.LQDIGMIDAVPGMR.A 2 Oxidation (M)        |
| 258 - 270   | 1476.6973 | 1475.6900 | 1475.6926 | -0.0026 | 0 R.ALDMNTAEDEIVR.L                         |
| 258 - 270   | 1492.6879 | 1491.6806 | 1491.6875 | -0.0069 | 0 R.ALDMNTAEDEIVR.L Oxidation (M)           |
| 274 - 294   | 2170.0674 | 2169.0601 | 2169.0809 | -0.0208 | 0 R.EVVPGMIVTGMEVAEIDGAPR.M                 |
| 274 - 294   | 2186.0654 | 2185.0582 | 2185.0758 | -0.0176 | 0 R.EVVPGMIVTGMEVAEIDGAPR.M Oxidation (M)   |
| 274 - 294   | 2202.0483 | 2201.0411 | 2201.0707 | -0.0296 | 0 R.EVVPGMIVTGMEVAEIDGAPR.M 2 Oxidation (M) |
| 295 - 308   | 1503.6415 | 1502.6342 | 1502.6567 | -0.0225 | 0 R.MGPTFGAMMISGQK.A 3 Oxidation (M)        |
| 316 - 328   | 1325.7357 | 1324.7284 | 1324.7462 | -0.0178 | 0 K.ALGRPNADGTIK.K                          |

## Spot 6d16

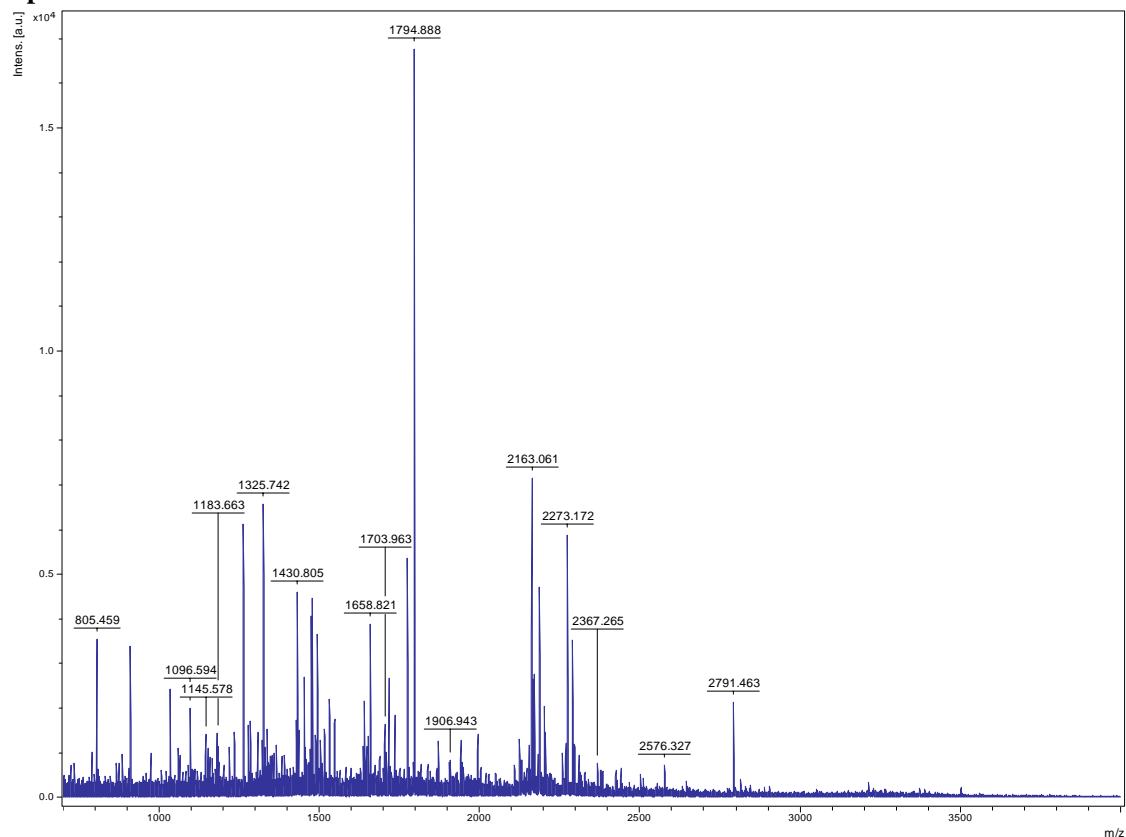

Match to: gi|32352138; Score: 126

### Matched peptides:

| Start - End | Observed | Mr (expt) | Mr (calc) | Delta | Miss Sequence                            |
|-------------|----------|-----------|-----------|-------|------------------------------------------|
| 2 - 20      | 1870.99  | 1869.99   | 1869.96   | 0.03  | 1 AAMATTASSLLKTSFAGAR Oxidation (M)      |
| 60 - 70     | 1262.70  | 1261.70   | 1261.70   | -0.01 | 1 FSPIKESIVSR                            |
| 139 - 162   | 2791.46  | 2790.46   | 2790.41   | 0.05  | 0 KPAHLFLDELGVAYDEQEDYVVIK               |
| 163 - 174   | 1336.66  | 1335.66   | 1335.66   | -0.00 | 0 HAALFTSTVMSR Oxidation (M)             |
| 175 - 182   | 910.61   | 909.61    | 909.58    | 0.04  | 0 LLARPNVK                               |
| 183 - 195   | 1430.80  | 1429.80   | 1429.82   | -0.02 | 0 LFNVAVEDLVK                            |
| 228 - 245   | 1773.86  | 1772.86   | 1772.85   | 0.00  | 0 VVSSCGHDGPFATGVK                       |
| 246 - 260   | 1703.96  | 1702.96   | 1702.85   | 0.11  | 1 RLQDIGMIDAVPGMR 2 Oxidation (M)        |
| 247 - 260   | 1515.75  | 1514.75   | 1514.76   | -0.01 | 0 LQDIGMIDAVPGMR                         |
| 247 - 260   | 1531.76  | 1530.76   | 1530.75   | 0.00  | 0 LQDIGMIDAVPGMR Oxidation (M)           |
| 247 - 260   | 1547.76  | 1546.76   | 1546.75   | 0.01  | 0 LQDIGMIDAVPGMR 2 Oxidation (M)         |
| 261 - 273   | 1492.70  | 1491.70   | 1491.69   | 0.01  | 0 ALDMNTAEDEIVR Oxidation (M)            |
| 277 - 297   | 2170.09  | 2169.08   | 2169.08   | 0.00  | 0 EVVPGMIVTGMVEVAEIDGAPR                 |
| 277 - 297   | 2202.08  | 2201.08   | 2201.07   | 0.01  | 0 EVVPGMIVTGMVEVAEIDGAPR 2 Oxidation (M) |
| 298 - 311   | 1487.69  | 1486.69   | 1486.66   | 0.03  | 0 MGPTFGAMMISGQK 2 Oxidation (M)         |
| 298 - 311   | 1503.67  | 1502.67   | 1502.66   | 0.01  | 0 MGPTFGAMMISGQK 3 Oxidation (M)         |
| 319 - 331   | 1325.74  | 1324.74   | 1324.75   | -0.01 | 0 ALGRPNADGTIK                           |

Match to: gi|77548611; Score: 89

### Matched peptides:

| Start - End | Observed | Mr (expt) | Mr (calc) | Delta | Miss Sequence              |
|-------------|----------|-----------|-----------|-------|----------------------------|
| 93 - 99     | 865.53   | 864.52    | 864.47    | 0.05  | 0 IFDTLLR                  |
| 124 - 145   | 2257.14  | 2256.14   | 2256.13   | 0.01  | 0 LGVDIIEAGFPASSPDDLDAVR   |
| 146 - 170   | 2576.33  | 2575.32   | 2575.31   | 0.02  | 0 SIAIEVGNTPVGEDGHVPVICLSR |
| 175 - 184   | 1145.58  | 1144.58   | 1144.55   | 0.02  | 0 DIDAAWEAVR               |
| 188 - 205   | 2202.08  | 2201.08   | 2201.16   | -0.08 | 1 RPIHTFIATSEIHMQHK        |
| 208 - 218   | 1183.66  | 1182.66   | 1182.70   | -0.04 | 1 KTPQVVAIAK               |
| 226 - 241   | 1735.77  | 1734.77   | 1734.75   | 0.02  | 0 SLGCPDVEFSPEDAGR         |
| 320 - 331   | 1328.70  | 1327.69   | 1327.71   | -0.02 | 0 QLEVTINGIGER             |
| 349 - 368   | 2163.06  | 2162.06   | 2162.10   | -0.05 | 0 ELLGGLYTGINTQHITMSSK     |
| 406 - 420   | 1649.83  | 1648.83   | 1648.83   | -0.00 | 0 GTYEIISPDIGLTR           |
| 520 - 534   | 1492.70  | 1491.70   | 1491.74   | -0.04 | 0 IACAVGTGPVDAAYK          |
| 535 - 547   | 1452.81  | 1451.81   | 1451.83   | -0.02 | 0 AVDDIIQIPTVLR            |
| 587 - 603   | 1635.85  | 1634.85   | 1634.86   | -0.01 | 0 AFSGSGAALDIVVSSVR        |

### Spot 6d17

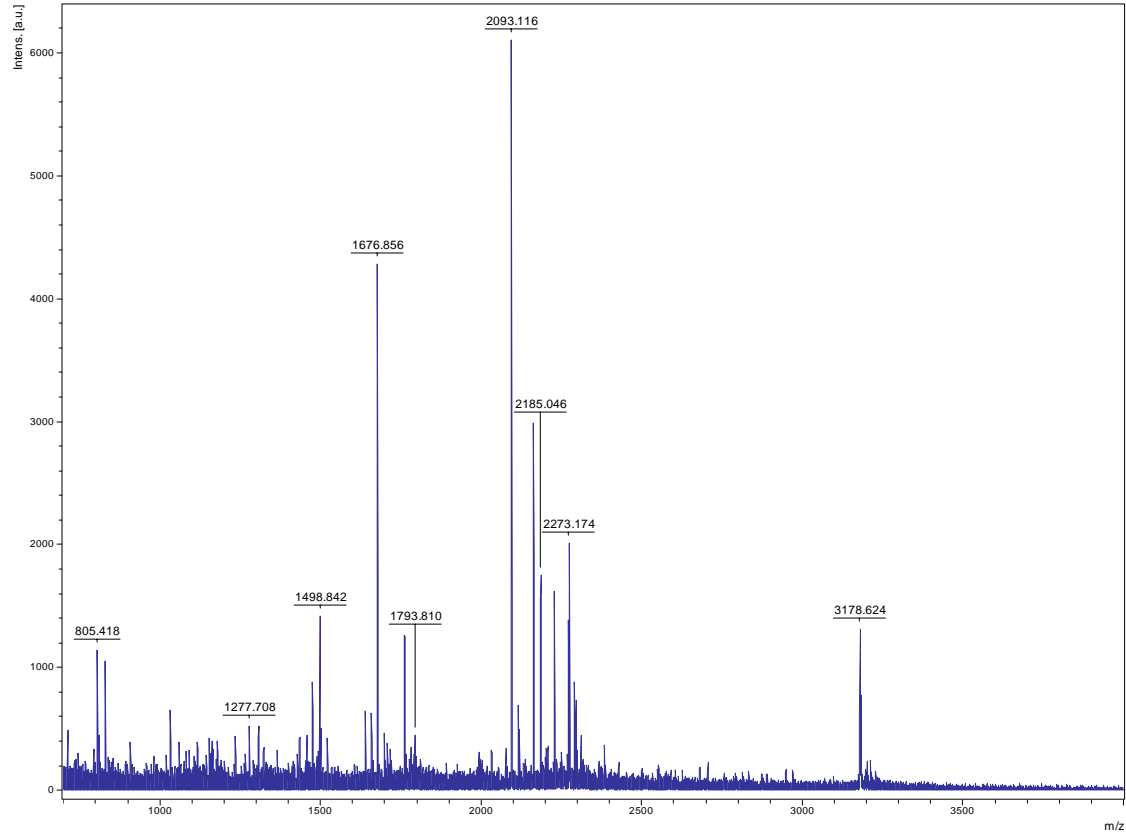

Match to: gi|786178; Score: 71

Matched peptides:

| Start - End | Observed | Mr (expt) | Mr (calc) | Delta | Miss Sequence                 |
|-------------|----------|-----------|-----------|-------|-------------------------------|
| 40 - 52     | 1520.76  | 1519.76   | 1519.73   | 0.03  | 0 FASINVENVEENR               |
| 40 - 53     | 1676.86  | 1675.85   | 1675.83   | 0.03  | 1 FASINVENVEENRR              |
| 85 - 94     | 1117.63  | 1116.63   | 1116.62   | 0.01  | 0 DGKPFVDVLK                  |
| 117 - 129   | 1457.71  | 1456.71   | 1456.69   | 0.02  | 1 ETTTQGHDDLQKR               |
| 133 - 139   | 829.39   | 828.39    | 828.38    | 0.01  | 0 YYEAGAR                     |
| 149 - 168   | 2093.12  | 2092.11   | 2092.09   | 0.02  | 0 IGPNEPSQLSIDLNAQGLAR        |
| 169 - 196   | 3178.62  | 3177.62   | 3177.60   | 0.02  | 0 YAICQENGLVPIVEPEILVDGSHDIER |

## Spot 6d22

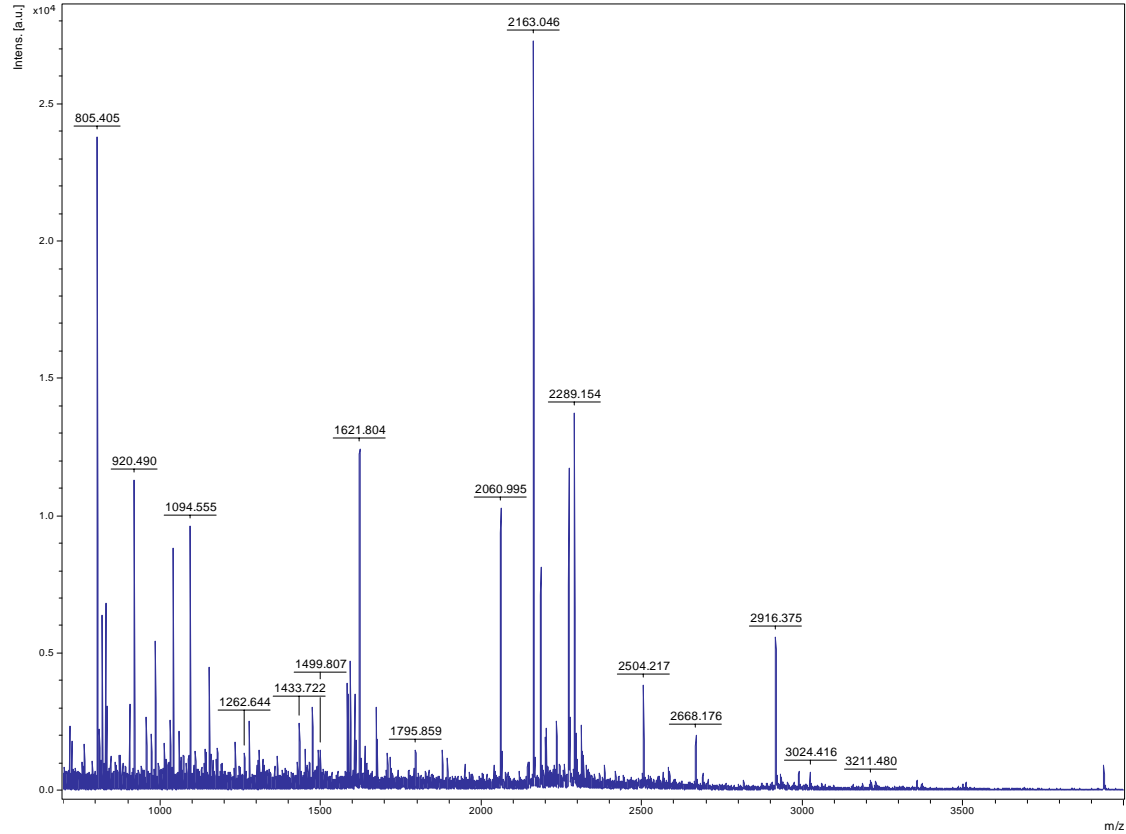

Match to: gi|77554103; Score: 97

### Matched peptides:

| Start - End | Observed | Mr (expt) | Mr (calc) | Delta | Miss Sequence                    |
|-------------|----------|-----------|-----------|-------|----------------------------------|
| 105 - 130   | 2931.33  | 2930.33   | 2930.29   | 0.03  | 0 ENYGCEVVCFTADVGGDIELEGLEK      |
| 144 - 159   | 2060.99  | 2059.99   | 2059.99   | -0.00 | 1 DLKEEFVSEIYPCLR                |
| 168 - 188   | 2234.41  | 2233.41   | 2233.23   | -0.18 | 1 YLLGTSMARPVIAKAMVDVAK          |
| 222 - 234   | 1584.82  | 1583.82   | 1583.82   | -0.00 | 1 VVAPWREWDTGR                   |
| 228 - 242   | 1795.86  | 1794.86   | 1794.84   | -0.01 | 1 EWDITGREDAIEYAK                |
| 316 - 325   | 1014.56  | 1013.56   | 1013.58   | -0.02 | 0 DLSPASLLAK                     |
| 338 - 344   | 876.43   | 875.42    | 875.42    | -0.01 | 0 IDMVENR                        |
| 352 - 367   | 1592.81  | 1591.80   | 1591.80   | -0.00 | 0 GYYETPGGTIMAAAVR               |
| 352 - 367   | 1608.79  | 1607.79   | 1607.80   | -0.01 | 0 GYYETPGGTIMAAAVR Oxidation (M) |
| 368 - 382   | 1878.93  | 1877.93   | 1877.92   | -0.01 | 1 ELESLLDRETMQWK                 |
| 368 - 382   | 1894.93  | 1893.93   | 1893.91   | -0.01 | 1 ELESLLDRETMQWK Oxidation (M)   |
| 389 - 397   | 1041.53  | 1040.53   | 1040.53   | -0.00 | 0 YAELVYAGR                      |
| 398 - 403   | 833.43   | 832.43    | 832.42    | -0.01 | 0 WFDPLR                         |
| 437 - 443   | 885.45   | 884.44    | 884.44    | -0.00 | 0 SPYSLYR                        |
| 444 - 465   | 2504.22  | 2503.21   | 2503.11   | -0.10 | 0 EDISSFENGEIYNQADAEQFIR         |
| 466 - 472   | 819.47   | 818.47    | 818.46    | -0.00 | 0 LYGLPTR                        |

## Spot 6d23

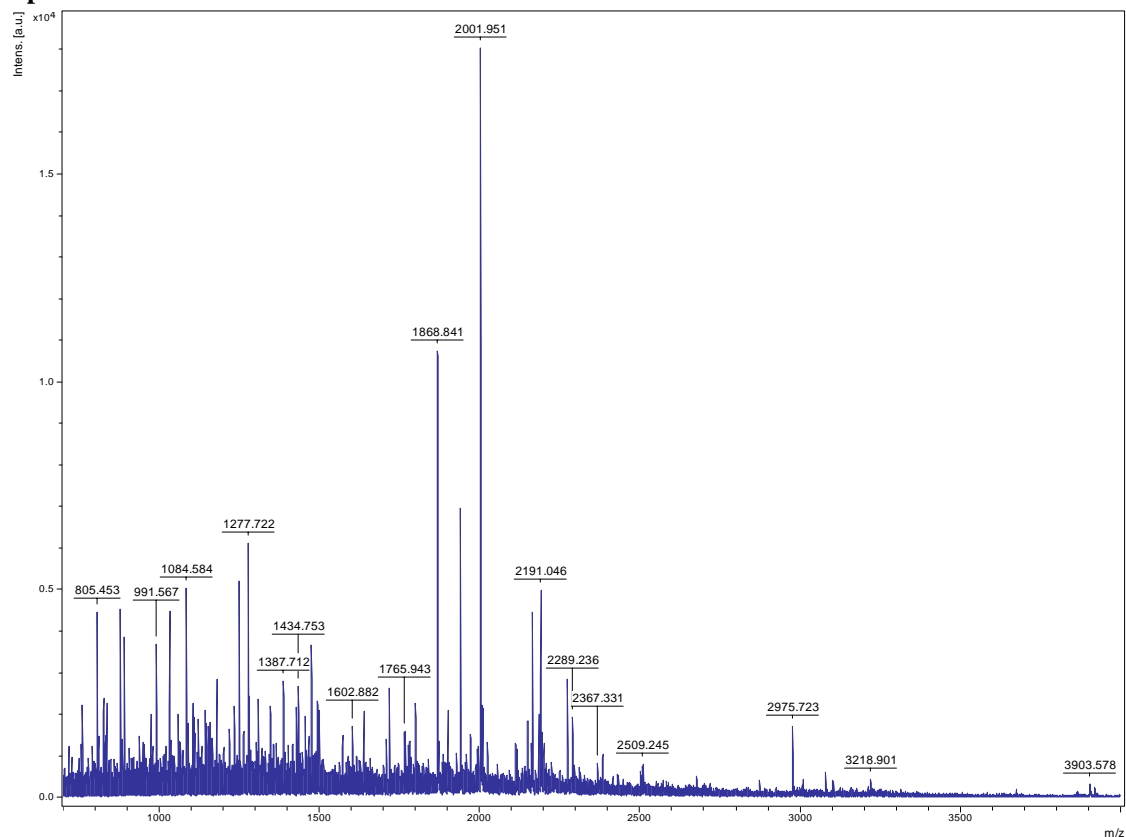

Match to: **gi|12229919**; Score: 118

Matched peptides:

| Start - End | Observed | Mr (expt) | Mr (calc) | Delta | Miss Sequence                    |
|-------------|----------|-----------|-----------|-------|----------------------------------|
| 21 - 29     | 1084.58  | 1083.58   | 1083.56   | 0.02  | 0 VFQVEYATK                      |
| 30 - 41     | 1159.64  | 1158.63   | 1158.62   | 0.01  | 0 AVDNSGTVVGIK                   |
| 58 - 65     | 937.47   | 936.47    | 936.42    | 0.06  | 0 MMLEGSNR                       |
| 58 - 65     | 953.48   | 952.48    | 952.41    | 0.07  | 0 MMLEGSNR Oxidation (M)         |
| 94 - 101    | 884.47   | 883.47    | 883.39    | 0.07  | 0 SEAASYEK                       |
| 102 - 110   | 991.57   | 990.56    | 990.54    | 0.03  | 0 VYGEPIVK                       |
| 144 - 159   | 1783.86  | 1782.86   | 1782.85   | 0.01  | 0 DGPQLYMIEPSGVSYK               |
| 144 - 159   | 1799.84  | 1798.84   | 1798.84   | -0.00 | 0 DGPQLYMIEPSGVSYK Oxidation (M) |
| 160 - 167   | 826.49   | 825.49    | 825.44    | 0.05  | 0 YFGAALGK                       |
| 181 - 187   | 878.47   | 877.47    | 877.43    | 0.04  | 0 LSELTCR                        |
| 196 - 205   | 1144.60  | 1143.60   | 1143.59   | 0.00  | 0 IYGVHDEAK                      |
| 196 - 207   | 1387.71  | 1386.71   | 1386.71   | -0.00 | 1 IYGVHDEAKDK                    |
| 206 - 222   | 2112.01  | 2111.00   | 2110.96   | 0.04  | 1 DKAFELLSWICDESNR               |
| 208 - 222   | 1868.84  | 1867.84   | 1867.84   | -0.00 | 0 AFELELSWICDESNR                |
| 227 - 236   | 1083.61  | 1082.61   | 1082.60   | 0.01  | 0 VPADLLEQAK                     |

Match to: **gi|1346109**; Score: 101

Matched peptides:

| Start - End | Observed | Mr (expt) | Mr (calc) | Delta | Miss Sequence                    |
|-------------|----------|-----------|-----------|-------|----------------------------------|
| 40 - 69     | 3218.90  | 3217.90   | 3217.60   | 0.29  | 1 DKSLLVWDLTNPVQNVGEGAGASEYGVVPR |
| 42 - 69     | 2975.72  | 2974.72   | 2974.48   | 0.24  | 0 SLLVWDLTNPVQNVGEGAGASEYGVVPR   |
| 101 - 111   | 1248.64  | 1247.64   | 1247.65   | -0.01 | 0 LWDLSTGVVTR                    |
| 143 - 151   | 1120.56  | 1119.56   | 1119.54   | 0.02  | 0 LWNTLGECK                      |
| 152 - 172   | 2191.05  | 2190.04   | 2189.99   | 0.05  | 0 YTIGGDLGGGEGHNGWVSCVR          |
| 173 - 189   | 1938.94  | 1937.94   | 1937.93   | 0.01  | 0 FSPNTFQPTIVSGSWDR              |
| 230 - 243   | 1572.83  | 1571.83   | 1571.83   | -0.00 | 1 DGVTLWDLAEGKR                  |
| 244 - 262   | 2150.10  | 2149.10   | 2149.06   | 0.03  | 0 LYSLDAGSIHSLCFSPNR             |
| 263 - 274   | 1455.70  | 1454.70   | 1454.69   | 0.01  | 0 YWLCAATQDSIK                   |
| 275 - 281   | 890.53   | 889.52    | 889.45    | 0.07  | 0 IWDLESK                        |
| 282 - 295   | 1602.88  | 1601.88   | 1601.91   | -0.03 | 0 HIVQDLKPEIPVSK                 |

# Spot 6d24

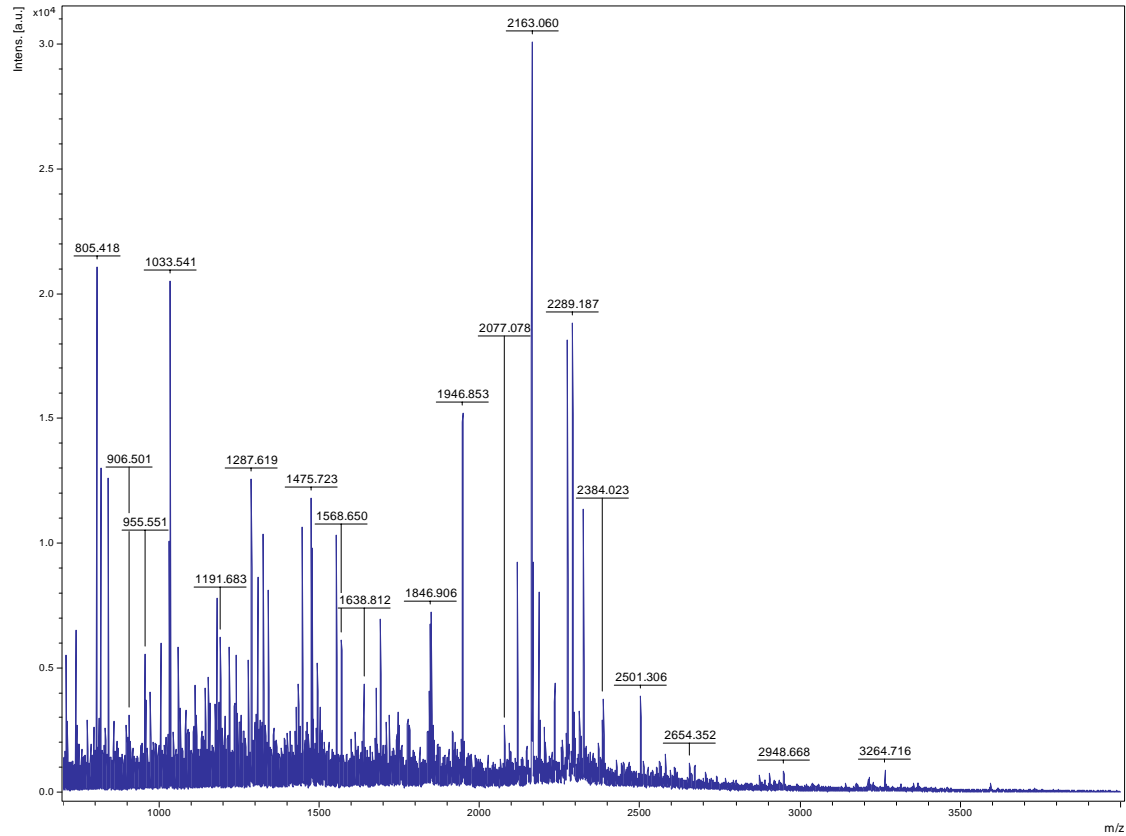

Match to: gi|108710002 Score: 115 Expect: 2.2e-07

## Matched peptides:

| Start - End | Observed  | Mr (expt) | Mr (calc) | Delta   | Miss Sequence |                                                               |
|-------------|-----------|-----------|-----------|---------|---------------|---------------------------------------------------------------|
| 1 - 10      | 1227.6206 | 1226.6133 | 1226.4907 | 0.1226  | 0             | -.MEETSPTNMRR.R 2 Oxidation (M)                               |
| 1 - 11      | 1393.7316 | 1392.7243 | 1392.6125 | 0.1118  | 1             | -.MEETSPTNMRR.K Acetyl (N-term)                               |
| 2 - 11      | 1262.6369 | 1261.6296 | 1261.5721 | 0.0576  | 1             | M.EETSPTNMRR.K Acetyl (N-term)                                |
| 12 - 24     | 1734.8344 | 1733.8271 | 1733.8136 | 0.0135  | 1             | R.KYSWWVNSHCIPK.N                                             |
| 12 - 24     | 1791.7412 | 1790.7339 | 1790.8351 | -0.1012 | 1             | R.KYSWWVNSHCIPK.N Carbamidomethyl (C)                         |
| 25 - 39     | 1850.9291 | 1849.9218 | 1849.8516 | 0.0702  | 1             | K.NSKWLQENLTDMDSK.I Acetyl (N-term)                           |
| 28 - 41     | 1720.8418 | 1719.8345 | 1719.8501 | -0.0156 | 1             | K.WLQENLTDMDSK.I.M                                            |
| 46 - 57     | 1407.7105 | 1406.7032 | 1406.7041 | -0.0009 | 1             | K.IIEEDAESFAKR.A                                              |
| 65 - 80     | 2038.9943 | 2037.9870 | 2038.0669 | -0.0799 | 1             | R.RPELMALLEELYRAYR.A Oxidation (M)                            |
| 86 - 94     | 1073.5625 | 1072.5552 | 1072.4937 | 0.0615  | 0             | R.YDHAAGELR.Q Acetyl (N-term)                                 |
| 148 - 157   | 1217.6095 | 1216.6022 | 1216.5432 | 0.0590  | 1             | K.QAKDNQDNER.L                                                |
| 151 - 157   | 932.5184  | 931.5111  | 931.3631  | 0.1480  | 0             | K.DNQDNER.L Acetyl (N-term)                                   |
| 151 - 160   | 1259.6850 | 1258.6777 | 1258.5902 | 0.0876  | 1             | K.DNQDNERLQK.E                                                |
| 158 - 170   | 1546.7985 | 1545.7912 | 1545.7886 | 0.0027  | 1             | R.LQKELSELSSEENK.D                                            |
| 161 - 170   | 1219.6343 | 1218.6270 | 1218.5615 | 0.0655  | 0             | K.ELESLSEENK.D Acetyl (N-term)                                |
| 176 - 185   | 1174.6445 | 1173.6372 | 1173.6241 | 0.0131  | 0             | R.ISSLLEQTNK.A Acetyl (N-term)                                |
| 176 - 194   | 2116.9771 | 2115.9698 | 2116.1449 | -0.1751 | 1             | R.ISSLLEQTNKAELEVVCLK.E                                       |
| 176 - 194   | 2216.0937 | 2215.0864 | 2215.1769 | -0.0905 | 1             | R.ISSLLEQTNKAELEVVCLK.E Acetyl (N-term); Carbamidomethyl (C)  |
| 186 - 194   | 1060.5868 | 1059.5795 | 1059.5634 | 0.0161  | 0             | K.AELEVVCLK.E Carbamidomethyl (C)                             |
| 205 - 217   | 1446.7256 | 1445.7183 | 1445.7296 | -0.0113 | 0             | K.EAIVLQCQSTAR.L                                              |
| 205 - 217   | 1503.8072 | 1502.7999 | 1502.7511 | 0.0488  | 0             | K.EAIVLQCQSTAR.L Carbamidomethyl (C)                          |
| 223 - 234   | 1501.7846 | 1500.7773 | 1500.7684 | 0.0089  | 1             | K.SEILHTQEKFNRL                                               |
| 237 - 252   | 1914.8953 | 1913.8880 | 1913.8101 | 0.0779  | 0             | K.EEMQSGQFPPTTADERS.S Acetyl (N-term)                         |
| 253 - 269   | 1972.9637 | 1971.9564 | 1972.0298 | -0.0734 | 1             | R.SVLLLEKANQEMNLELNK.L                                        |
| 259 - 269   | 1319.6552 | 1318.6479 | 1318.6187 | 0.0293  | 0             | K.ANQEMNLELNK.L Oxidation (M)                                 |
| 259 - 269   | 1361.6942 | 1360.6869 | 1360.6292 | 0.0577  | 0             | K.ANQEMNLELNK.L Acetyl (N-term); Oxidation (M)                |
| 276 - 284   | 1196.6344 | 1195.6271 | 1195.5833 | 0.0439  | 1             | K.QKHEELNEK.Q Acetyl (N-term)                                 |
| 302 - 314   | 1538.7352 | 1537.7279 | 1537.6938 | 0.0341  | 0             | K.CMQAEMAQLSLEK.Q Carbamidomethyl (C)                         |
| 302 - 322   | 2465.1628 | 2464.1555 | 2464.2011 | -0.0456 | 1             | K.CMQAEMAQLSLEKQLILAQDK.M Acetyl (N-term); 2 Oxidation (M)    |
| 315 - 322   | 970.5673  | 969.5600  | 969.5495  | 0.0106  | 0             | K.QLILAQDK.M Acetyl (N-term)                                  |
| 331 - 336   | 745.3927  | 744.3854  | 744.4017  | -0.0163 | 0             | K.QIEVSK.A Acetyl (N-term)                                    |
| 331 - 338   | 944.5236  | 943.5163  | 943.5338  | -0.0175 | 1             | K.QIEVSKAK.D Acetyl (N-term)                                  |
| 375 - 383   | 1132.5407 | 1131.5334 | 1131.5845 | -0.0511 | 0             | R.LQDEIITMK.N Acetyl (N-term)                                 |
| 375 - 387   | 1617.7862 | 1616.7789 | 1616.8192 | -0.0402 | 1             | R.LQDEIITMKNQQR.R Acetyl (N-term); Oxidation (M)              |
| 389 - 400   | 1471.7558 | 1470.7485 | 1470.6772 | 0.0713  | 1             | R.LEEDVCRHVDEK.K                                              |
| 389 - 400   | 1513.8804 | 1512.8731 | 1512.6878 | 0.1853  | 1             | R.LEEDVCRHVDEK.K Acetyl (N-term)                              |
| 401 - 411   | 1383.7238 | 1382.7165 | 1382.7340 | -0.0175 | 1             | K.KTLQNELCHLK.E Carbamidomethyl (C)                           |
| 402 - 411   | 1240.7176 | 1239.7103 | 1239.6281 | 0.0822  | 0             | K.TLQNELCHLK.E Acetyl (N-term)                                |
| 402 - 414   | 1655.8341 | 1654.8268 | 1654.8097 | 0.0171  | 1             | K.TLQNELCHLKEDRS.S Carbamidomethyl (C)                        |
| 420 - 425   | 741.4721  | 740.4648  | 740.4181  | 0.0468  | 1             | K.KHSSIK.E Acetyl (N-term)                                    |
| 447 - 457   | 1213.6979 | 1212.6906 | 1212.6826 | 0.0081  | 1             | K.DGNVELKGIIR.N                                               |
| 458 - 472   | 1846.9258 | 1845.9185 | 1845.9445 | -0.0260 | 1             | R.NHESTEVLHLENLRR.L                                           |
| 486 - 498   | 1459.7311 | 1458.7238 | 1458.7929 | -0.0691 | 0             | K.SLSAVTTEVLVLR.E Acetyl (N-term)                             |
| 543 - 561   | 2163.0402 | 2162.0329 | 2162.0491 | -0.0161 | 0             | K.NVFLENSLSANAELESRLR.G Acetyl (N-term)                       |
| 564 - 585   | 2533.2193 | 2532.2120 | 2532.2343 | -0.0223 | 1             | K.LKELESSEALYSQNSALQHEK.S                                     |
| 586 - 594   | 1049.5529 | 1048.5456 | 1048.4971 | 0.0485  | 0             | K.STLACQVDR.I Carbamidomethyl (C)                             |
| 612 - 620   | 1141.5724 | 1140.5651 | 1140.5523 | 0.0128  | 1             | K.RHSDLQEEK.G                                                 |
| 630 - 635   | 786.3490  | 785.3417  | 785.4395  | -0.0978 | 0             | K.LQEQIR.F                                                    |
| 640 - 648   | 1136.6078 | 1135.6005 | 1135.5006 | 0.0999  | 0             | K.EHNDLEHSR.K                                                 |
| 640 - 649   | 1264.6549 | 1263.6476 | 1263.5956 | 0.0520  | 1             | K.EHNDLEHSRK.S                                                |
| 650 - 658   | 1082.5951 | 1081.5878 | 1081.5404 | 0.0475  | 0             | K.SQLDALHEK.T Acetyl (N-term)                                 |
| 650 - 669   | 2337.1799 | 2336.1726 | 2336.1872 | -0.0146 | 1             | K.SQLDALHEKINVLSEQGWNR.E                                      |
| 692 - 709   | 2093.0756 | 2092.0683 | 2091.9782 | 0.0901  | 0             | K.QCLEDIADANSDFLAQLK.M Acetyl (N-term); Carbamidomethyl (C)   |
| 692 - 711   | 2310.1175 | 2309.1102 | 2309.1031 | 0.0071  | 1             | K.QCLEDIADANSDFLAQLKMK.Q Carbamidomethyl (C)                  |
| 710 - 721   | 1505.7531 | 1504.7458 | 1504.7265 | 0.0193  | 1             | K.MKQEVQCVLEEK.M Acetyl (N-term)                              |
| 712 - 721   | 1204.6159 | 1203.6086 | 1203.5805 | 0.0281  | 0             | K.QEVQCVLEEK.M                                                |
| 712 - 731   | 2540.2372 | 2539.2299 | 2539.1570 | 0.0730  | 1             | K.QEVQCVLEEKMEYLSENNQL.L Acetyl (N-term); Carbamidomethyl (C) |

|             |           |           |           |         |   |                                     |                                                     |
|-------------|-----------|-----------|-----------|---------|---|-------------------------------------|-----------------------------------------------------|
| 732 - 741   | 1103.5756 | 1102.5683 | 1102.6420 | -0.0736 | 1 | K.LTKICIGSVLK.V                     | Acetyl (N-term)                                     |
| 735 - 748   | 1609.8286 | 1608.8213 | 1608.8908 | -0.0695 | 1 | K.CIGSVLKVHLHEEK.Y                  | Acetyl (N-term)                                     |
| 790 - 807   | 2025.9271 | 2024.9198 | 2025.0894 | -0.1696 | 0 | K.SLVVTLLEHFGQEVADLR.S              |                                                     |
| 821 - 829   | 1157.6113 | 1156.6040 | 1156.6088 | -0.0047 | 0 | K.SEELLQIQRE                        | Acetyl (N-term)                                     |
| 821 - 831   | 1372.7223 | 1371.7150 | 1371.7357 | -0.0207 | 1 | K.SEELLQIQREK.Q                     |                                                     |
| 832 - 850   | 2449.1874 | 2448.1801 | 2448.1557 | 0.0245  | 1 | K.QELVNITDEFWEEVETRNR.K             | Acetyl (N-term)                                     |
| 861 - 873   | 1475.7620 | 1474.7547 | 1474.7779 | -0.0232 | 0 | K.FLVGQSELQGSR.R                    | Acetyl (N-term)                                     |
| 874 - 882   | 1115.6407 | 1114.6334 | 1114.6346 | -0.0012 | 1 | R.RSLQSEIHK.L                       | Acetyl (N-term)                                     |
| 883 - 898   | 1967.9293 | 1966.9220 | 1966.8612 | 0.0608  | 0 | K.LIQENSMLSDELCDSE.R                | Acetyl (N-term); Carbamidomethyl (C); Oxidation (M) |
| 883 - 900   | 2225.0877 | 2224.0804 | 2223.9987 | 0.0817  | 1 | K.LIQENSMLSDELCDSE.R                | Acetyl (N-term); Carbamidomethyl (C); Oxidation (M) |
| 903 - 918   | 1874.9198 | 1873.9125 | 1873.9019 | 0.0107  | 0 | R.VFEDDFSILISEVMSK.D                | Oxidation (M)                                       |
| 919 - 926   | 948.5001  | 947.4928  | 947.5440  | -0.0512 | 0 | K.DILSVVFR.S                        |                                                     |
| 959 - 969   | 1399.7492 | 1398.7419 | 1398.6193 | 0.1227  | 1 | K.MMNMKLGDLEK.E                     | Acetyl (N-term); 3 Oxidation (M)                    |
| 981 - 1011  | 3264.6933 | 3263.6860 | 3263.5112 | 0.1748  | 1 | R.TISICNSTSTENAIAGSGVPGRDTDHLNSGR.S | Acetyl (N-term)                                     |
| 1046 - 1056 | 1314.6497 | 1313.6424 | 1313.5843 | 0.0582  | 0 | K.MQSEMEVLTSE.E                     | 2 Oxidation (M)                                     |
| 1046 - 1056 | 1324.6446 | 1323.6373 | 1323.6050 | 0.0323  | 0 | K.MQSEMEVLTSE.E                     | Acetyl (N-term)                                     |
| 1046 - 1056 | 1340.6401 | 1339.6328 | 1339.5999 | 0.0329  | 0 | K.MQSEMEVLTSE.E                     | Acetyl (N-term); Oxidation (M)                      |
| 1046 - 1056 | 1356.7315 | 1355.7242 | 1355.5948 | 0.1294  | 0 | K.MQSEMEVLTSE.E                     | Acetyl (N-term); 2 Oxidation (M)                    |
| 1046 - 1064 | 2185.0547 | 2184.0474 | 2184.0289 | 0.0185  | 1 | K.MQSEMEVLTSEKNSAIDIK.S             | 2 Oxidation (M)                                     |
| 1057 - 1071 | 1679.8497 | 1678.8424 | 1678.7719 | 0.0705  | 1 | K.ENSADIKSCDEDIK.R                  |                                                     |
| 1091 - 1113 | 2654.3187 | 2653.3114 | 2653.3957 | -0.0843 | 1 | K.VLELIITCESFEISSMVQKEVLK.E         | Oxidation (M)                                       |
| 1164 - 1177 | 1633.8046 | 1632.7973 | 1632.7777 | 0.0196  | 0 | K.QTSLANDCLQSNK.L                   | Acetyl (N-term); Carbamidomethyl (C)                |
| 1178 - 1191 | 1689.8501 | 1688.8428 | 1688.8767 | -0.0338 | 1 | K.LRMEENALSTQVLK.T                  | Acetyl (N-term); Oxidation (M)                      |
| 1180 - 1195 | 1922.9334 | 1921.9261 | 1921.9237 | 0.0024  | 1 | R.MEENALSTQVLKTNMR.S                | Acetyl (N-term); Oxidation (M)                      |
| 1192 - 1204 | 1465.7376 | 1464.7303 | 1464.6739 | 0.0564  | 1 | K.TNMRSSGDQNTVR.T                   |                                                     |
| 1196 - 1204 | 1005.5695 | 1004.5622 | 1004.4523 | 0.1100  | 0 | R.SSGDQNTVR.T                       | Acetyl (N-term)                                     |
| 1205 - 1213 | 1091.5775 | 1090.5702 | 1090.5692 | 0.0010  | 1 | R.TVKDMELQK.L                       |                                                     |
| 1205 - 1213 | 1107.5474 | 1106.5401 | 1106.5641 | -0.0240 | 1 | R.TVKDMELQK.L                       | Oxidation (M)                                       |
| 1208 - 1213 | 805.3653  | 804.3580  | 804.3687  | -0.0107 | 0 | K.DMELQK.L                          | Acetyl (N-term)                                     |
| 1208 - 1219 | 1412.7172 | 1411.7099 | 1411.7493 | -0.0394 | 1 | K.DMELQKHLGTIK.A                    |                                                     |
| 1214 - 1219 | 710.2701  | 709.2628  | 709.4122  | -0.1494 | 0 | K.LHGTIK.A                          | Acetyl (N-term)                                     |
| 1224 - 1236 | 1500.7880 | 1499.7807 | 1499.7831 | -0.0024 | 0 | K.VVTDTAVLLDQER.L                   | Acetyl (N-term)                                     |
| 1237 - 1248 | 1418.7481 | 1417.7408 | 1417.7313 | 0.0095  | 1 | R.LDFNANLQEARQ.Q                    |                                                     |
| 1255 - 1273 | 2353.1692 | 2352.1619 | 2352.1592 | 0.0027  | 1 | K.LKEILDDDLIEMNYEQLK.D              |                                                     |
| 1255 - 1273 | 2427.2689 | 2426.2616 | 2426.1596 | 0.1020  | 1 | K.LKEILDDDLIEMNYEQLK.D              | Acetyl (N-term); 2 Oxidation (M)                    |
| 1274 - 1296 | 2442.2944 | 2441.2871 | 2441.2761 | 0.0110  | 1 | K.DIQLDLIQISSGNKGTSLGQANK.T         | Acetyl (N-term)                                     |
| 1288 - 1304 | 1716.8487 | 1715.8414 | 1715.8802 | -0.0387 | 1 | K.TGSLGQANKTVAQANEK.M               |                                                     |
| 1297 - 1320 | 2510.1954 | 2509.1881 | 2509.2343 | -0.0461 | 1 | K.TVAQANEKMLDHSIGVGASSSHVR.N        | Oxidation (M)                                       |
| 1321 - 1337 | 2095.0386 | 2094.0313 | 2093.9766 | 0.0547  | 1 | R.NDLRPPQSESEFERDNYK.R              |                                                     |
| 1334 - 1347 | 1675.7952 | 1674.7879 | 1674.8763 | -0.0883 | 1 | R.DNYKRPPSESELMVVK.E                |                                                     |
| 1359 - 1371 | 1597.8282 | 1596.8209 | 1596.7896 | 0.0313  | 1 | R.SITTEPHQEWKNK.V                   |                                                     |
| 1376 - 1382 | 760.3954  | 759.3881  | 759.3875  | 0.0006  | 0 | R.LASDAQR.L                         |                                                     |
| 1414 - 1428 | 1663.8228 | 1662.8155 | 1662.8100 | 0.0055  | 0 | R.EAEGFITQLIDSNGK.L                 | Acetyl (N-term)                                     |
| 1457 - 1462 | 775.3824  | 774.3751  | 774.4170  | -0.0419 | 1 | K.IMERAR.K                          |                                                     |
| 1457 - 1462 | 817.4086  | 816.4013  | 816.4276  | -0.0262 | 1 | K.IMERAR.K                          | Acetyl (N-term)                                     |
| 1471 - 1484 | 1657.8236 | 1656.8163 | 1656.9120 | -0.0956 | 1 | R.LEVEMQKVQEAALK.Y                  |                                                     |
| 1485 - 1495 | 1329.6687 | 1328.6614 | 1328.6208 | 0.0406  | 1 | K.YEEQTSTRTK.T                      |                                                     |
| 1496 - 1500 | 758.3775  | 757.3702  | 757.3653  | 0.0049  | 1 | K.TMHRR.S                           | Acetyl (N-term); Oxidation (M)                      |
| 1503 - 1513 | 1365.7149 | 1364.7076 | 1364.7564 | -0.0488 | 1 | K.VQLVDFLYGRR.R                     |                                                     |
| 1522 - 1529 | 942.5164  | 941.5091  | 941.3227  | 0.1864  | 0 | R.CSPCGCMK.A                        | 2 Carbamidomethyl (C)                               |
| 1522 - 1529 | 958.5235  | 957.5162  | 957.3177  | 0.1986  | 0 | R.CSPCGCMK.A                        | 2 Carbamidomethyl (C); Oxidation (M)                |

1. Dai S, Chen T, Chong K, Xue Y, Liu S, Wang T (2007) Proteomics Identification of Differentially Expressed Proteins Associated with Pollen Germination and Tube Growth Reveals Characteristics of Germinated *Oryza sativa* Pollen. *Molecular & Cellular Proteomics* 6: 207
