# Supplementary material
Source: PubMed Central journal article supplement (PMC2556828)
Supplement: pp.108.125633_3.pdf [file pp.108.125633_3.pdf]

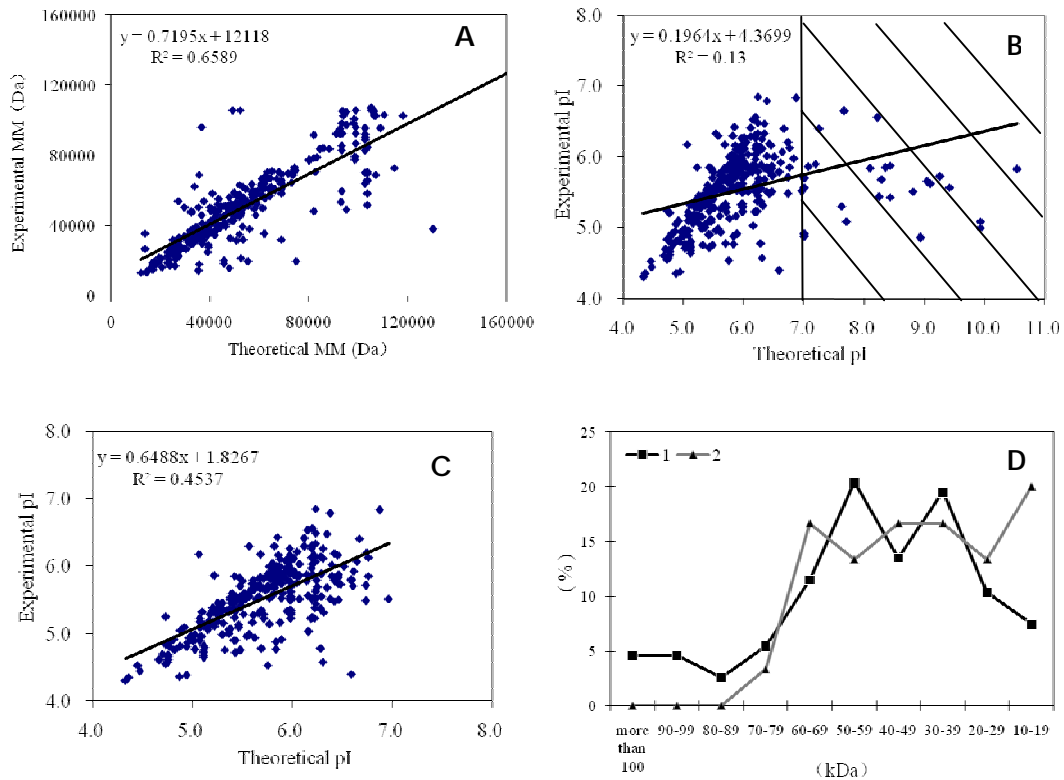

**Figure S3.** The correlation of molecular mass (MM) and isoelectric point (pI) between theoretical and experimental data. A and B, MM and pI analysis of all proteins (345), respectively. C, correlation of theoretical and experimental pI for the proteins with theoretical pI lower than 7 (319). D, histogram of protein distribution in different ranges of MM; 1, all proteins (347); 2, the proteins with theoretical pI more than 7 (26).
